# Supplementary material for: Influence of Ligand Backbone Structure and Connectivity on the Properties of Phosphine-Sulfonate Pd(II)/Ni(II) Catalysts
Source: Polymers (Basel). 2017 May 9;9(5):168. doi: 10.3390/polym9050168 (PMC6431890; doi:10.3390/polym9050168)
Supplement: Supplementary file 1 [file polymers-09-00168-s001.zip]

Archive with 5 entries (5 files):
- checkcif-Ni.pdf
- checkcif-Pd.pdf
- Ni.cif
- Pd.cif
- polymers-09-00168-s001.pdf
