# Supplementary material for: Influence of Ligand Backbone Structure and Connectivity on the Properties of Phosphine-Sulfonate Pd(II)/Ni(II) Catalysts
Source: Polymers (Basel). 2017 May 9;9(5):168. doi: 10.3390/polym9050168 (PMC6431890; doi:10.3390/polym9050168)
Supplement: Supplementary file 1 [file polymers-09-00168-s001.zip › Ni.cif]

 
data_shelxl
 
_audit_creation_method            SHELXL-2013
_chemical_name_systematic
;
 ?
;
_chemical_name_common             ?
_chemical_melting_point           ?
_chemical_formula_moiety          ?
_chemical_formula_sum
 'C46 H36 Ni O3 P2 S' 
_chemical_formula_weight          789.46

loop_
 _atom_type_symbol
 _atom_type_description
 _atom_type_scat_dispersion_real
 _atom_type_scat_dispersion_imag
 _atom_type_scat_source
 'C'  'C'   0.0181   0.0091
 'International Tables Vol C Tables 4.2.6.8 and 6.1.1.4'
 'H'  'H'   0.0000   0.0000
 'International Tables Vol C Tables 4.2.6.8 and 6.1.1.4'
 'O'  'O'   0.0492   0.0322
 'International Tables Vol C Tables 4.2.6.8 and 6.1.1.4'
 'P'  'P'   0.2955   0.4335
 'International Tables Vol C Tables 4.2.6.8 and 6.1.1.4'
 'Ni'  'Ni'  -3.0029   0.5091
 'International Tables Vol C Tables 4.2.6.8 and 6.1.1.4'
 'S'  'S'   0.3331   0.5567
 'International Tables Vol C Tables 4.2.6.8 and 6.1.1.4'
 
_space_group_crystal_system       triclinic
_space_group_IT_number            2
_space_group_name_H-M_alt         'P -1'
_space_group_name_Hall            '-P 1'
 
_shelx_space_group_comment
;
The symmetry employed for this shelxl refinement is uniquely defined
by the following loop, which should always be used as a source of
symmetry information in preference to the above space-group names.
They are only intended as comments.
;
 
loop_
 _space_group_symop_operation_xyz
 'x, y, z'
 '-x, -y, -z'
 
_cell_length_a                    9.1365(3)
_cell_length_b                    13.7655(4)
_cell_length_c                    15.5272(6)
_cell_angle_alpha                 83.902(3)
_cell_angle_beta                  88.918(3)
_cell_angle_gamma                 76.670(2)
_cell_volume                      1889.44(11)
_cell_formula_units_Z             2
_cell_measurement_temperature     291(2)
_cell_measurement_reflns_used     9474
_cell_measurement_theta_min       4.9540
_cell_measurement_theta_max       71.2970
 
_exptl_crystal_description        block 
_exptl_crystal_colour             ? 
_exptl_crystal_density_meas       ? 
_exptl_crystal_density_method     ?              
_exptl_crystal_density_diffrn     1.388          
_exptl_crystal_F_000              820
_exptl_transmission_factor_min    ?                                             
_exptl_transmission_factor_max    ?                                             
_exptl_crystal_size_max           0.250
_exptl_crystal_size_mid           0.220
_exptl_crystal_size_min           0.210
_exptl_absorpt_coefficient_mu     2.388
_shelx_estimated_absorpt_T_min    0.587
_shelx_estimated_absorpt_T_max    0.634
_exptl_absorpt_correction_T_min   0.65889
_exptl_absorpt_correction_T_max                   1.00000
_exptl_absorpt_correction_type            multi-scan
_exptl_absorpt_process_details
;
CrysAlisPro 1.171.38.43f (Rigaku Oxford Diffraction, 2015)
Empirical absorption correction using spherical harmonics,
 implemented in SCALE3 ABSPACK scaling algorithm.
;

_exptl_special_details
;
 ?
;
 
_diffrn_ambient_temperature       291(2)
_diffrn_radiation_wavelength      1.54184
_diffrn_radiation_type            CuK\a
_diffrn_source                    'micro-focus sealed X-ray tube'                       
_diffrn_measurement_device_type   'SuperNova, Dual, Cu at zero, AtlasS2' 
_diffrn_measurement_method        '\w scans' 
_diffrn_detector_area_resol_mean  5.2169
_diffrn_reflns_number             12803
_diffrn_reflns_av_unetI/netI      0.0270
_diffrn_reflns_av_R_equivalents   0.0205
_diffrn_reflns_limit_h_min        -11
_diffrn_reflns_limit_h_max        9
_diffrn_reflns_limit_k_min        -16
_diffrn_reflns_limit_k_max        16
_diffrn_reflns_limit_l_min        -18
_diffrn_reflns_limit_l_max        19
_diffrn_reflns_theta_min          4.150
_diffrn_reflns_theta_max          71.347
_diffrn_reflns_theta_full         67.684
_diffrn_measured_fraction_theta_max   0.971
_diffrn_measured_fraction_theta_full  0.997
_diffrn_reflns_Laue_measured_fraction_max    0.971
_diffrn_reflns_Laue_measured_fraction_full   0.997
_diffrn_reflns_point_group_measured_fraction_max   0.971
_diffrn_reflns_point_group_measured_fraction_full  0.997
_reflns_number_total              7121
_reflns_number_gt                 6637
_reflns_threshold_expression      'I > 2\s(I)'
_reflns_Friedel_coverage          0.000
_reflns_Friedel_fraction_max      .
_reflns_Friedel_fraction_full     .
 
_reflns_special_details
;
 Reflections were merged by SHELXL according to the crystal
 class for the calculation of statistics and refinement.
 
 _reflns_Friedel_fraction is defined as the number of unique
 Friedel pairs measured divided by the number that would be
 possible theoretically, ignoring centric projections and
 systematic absences.
;
 
_computing_data_collection        'CrysAlisPro (Rigaku OD, 2015)'
_computing_cell_refinement        'CrysAlisPro (Rigaku OD, 2015)'
_computing_data_reduction         'CrysAlisPro (Rigaku OD, 2015)'
_computing_structure_solution     'SHELXS-97 (Sheldrick, 1997)'
_computing_structure_refinement   'SHELXL-97 (Sheldrick, 1997)'
_computing_molecular_graphics     'Ortep-3 (L. J. Farrugia, 2001)'
_computing_publication_material   SHELXL-97
 
_refine_special_details
;
 ?
;
_refine_ls_structure_factor_coef  Fsqd
_refine_ls_matrix_type            full
_refine_ls_weighting_scheme       calc
_refine_ls_weighting_details
'w=1/[\s^2^(Fo^2^)+(0.0474P)^2^+0.5772P] where P=(Fo^2^+2Fc^2^)/3'
_atom_sites_solution_primary      ?
_atom_sites_solution_secondary    ?
_atom_sites_solution_hydrogens    geom
_refine_ls_hydrogen_treatment     constr
_refine_ls_extinction_method      none
_refine_ls_extinction_coef        .
_refine_ls_number_reflns          7121
_refine_ls_number_parameters      478
_refine_ls_number_restraints      0
_refine_ls_R_factor_all           0.0331
_refine_ls_R_factor_gt            0.0311
_refine_ls_wR_factor_ref          0.0863
_refine_ls_wR_factor_gt           0.0846
_refine_ls_goodness_of_fit_ref    1.027
_refine_ls_restrained_S_all       1.027
_refine_ls_shift/su_max           0.002
_refine_ls_shift/su_mean          0.000
 
loop_
 _atom_site_label
 _atom_site_type_symbol
 _atom_site_fract_x
 _atom_site_fract_y
 _atom_site_fract_z
 _atom_site_U_iso_or_equiv
 _atom_site_adp_type
 _atom_site_occupancy
 _atom_site_site_symmetry_order  
 _atom_site_calc_flag
 _atom_site_refinement_flags_posn
 _atom_site_refinement_flags_adp
 _atom_site_refinement_flags_occupancy
 _atom_site_disorder_assembly
 _atom_site_disorder_group
Ni1 Ni 0.60080(3) 0.72493(2) 0.23781(2) 0.02610(8) Uani 1 1 d . . . . .
P1 P 0.48995(4) 0.78967(3) 0.35411(2) 0.02603(9) Uani 1 1 d . . . . .
P2 P 0.75114(4) 0.66214(3) 0.13425(2) 0.02777(9) Uani 1 1 d . . . . .
S1 S 0.40800(4) 0.58950(3) 0.29343(2) 0.03246(10) Uani 1 1 d . . . . .
O1 O 0.56819(12) 0.59115(8) 0.27407(7) 0.0332(2) Uani 1 1 d . . . . .
O3 O 0.30693(15) 0.66990(11) 0.24253(8) 0.0513(3) Uani 1 1 d . . . . .
O2 O 0.38490(17) 0.49009(11) 0.29159(9) 0.0519(3) Uani 1 1 d . . . . .
C3 C 0.36879(17) 0.72664(11) 0.51747(10) 0.0301(3) Uani 1 1 d . . . . .
C1 C 0.37944(16) 0.61822(11) 0.40288(9) 0.0279(3) Uani 1 1 d . . . . .
C2 C 0.40477(16) 0.70563(11) 0.42964(9) 0.0279(3) Uani 1 1 d . . . . .
C41 C 0.61972(18) 0.85494(11) 0.19490(10) 0.0311(3) Uani 1 1 d . . . . .
C4 C 0.31799(17) 0.65349(12) 0.57480(10) 0.0318(3) Uani 1 1 d . . . . .
C29 C 0.64823(17) 0.80619(12) 0.41708(9) 0.0305(3) Uani 1 1 d . . . . .
C35 C 0.34387(18) 0.90511(11) 0.33876(10) 0.0316(3) Uani 1 1 d . . . . .
C11 C 0.87361(17) 0.54439(12) 0.18056(11) 0.0347(3) Uani 1 1 d . . . . .
C6 C 0.32520(18) 0.54782(12) 0.46002(10) 0.0337(3) Uani 1 1 d . . . . .
H6 H 0.3086 0.4898 0.4402 0.040 Uiso 1 1 calc R U . . .
C5 C 0.29738(18) 0.56510(12) 0.54384(11) 0.0352(3) Uani 1 1 d . . . . .
H5 H 0.2641 0.5177 0.5815 0.042 Uiso 1 1 calc R U . . .
C23 C 0.87850(17) 0.73528(12) 0.08222(10) 0.0319(3) Uani 1 1 d . . . . .
C42 C 0.7362(2) 0.89851(13) 0.21557(11) 0.0382(4) Uani 1 1 d . . . . .
H42 H 0.8131 0.8621 0.2524 0.046 Uiso 1 1 calc R U . . .
C10 C 0.2881(2) 0.67053(14) 0.66229(11) 0.0417(4) Uani 1 1 d . . . . .
H10 H 0.2595 0.6213 0.7002 0.050 Uiso 1 1 calc R U . . .
C7 C 0.3772(2) 0.81719(13) 0.55044(11) 0.0395(4) Uani 1 1 d . . . . .
H7 H 0.4065 0.8674 0.5141 0.047 Uiso 1 1 calc R U . . .
C17 C 0.65122(19) 0.63490(13) 0.04340(10) 0.0353(3) Uani 1 1 d . . . . .
C40 C 0.3759(2) 0.99675(12) 0.30827(11) 0.0383(4) Uani 1 1 d . . . . .
H40 H 0.4754 1.0017 0.3013 0.046 Uiso 1 1 calc R U . . .
C30 C 0.6681(2) 0.89562(13) 0.44370(11) 0.0387(4) Uani 1 1 d . . . . .
H30 H 0.5929 0.9539 0.4331 0.046 Uiso 1 1 calc R U . . .
C46 C 0.5082(2) 0.91126(14) 0.13809(11) 0.0415(4) Uani 1 1 d . . . . .
H46 H 0.4308 0.8832 0.1219 0.050 Uiso 1 1 calc R U . . .
C36 C 0.1939(2) 0.89951(14) 0.34777(12) 0.0426(4) Uani 1 1 d . . . . .
H36 H 0.1705 0.8387 0.3673 0.051 Uiso 1 1 calc R U . . .
C22 C 0.4951(2) 0.65468(14) 0.04471(11) 0.0399(4) Uani 1 1 d . . . . .
H22 H 0.4432 0.6780 0.0933 0.048 Uiso 1 1 calc R U . . .
C8 C 0.3431(2) 0.83213(15) 0.63474(12) 0.0476(4) Uani 1 1 d . . . . .
H8 H 0.3482 0.8927 0.6546 0.057 Uiso 1 1 calc R U . . .
C16 C 0.9445(2) 0.54524(15) 0.25879(13) 0.0459(4) Uani 1 1 d . . . . .
H16 H 0.9282 0.6045 0.2850 0.055 Uiso 1 1 calc R U . . .
C12 C 0.8965(2) 0.45468(13) 0.14377(14) 0.0479(4) Uani 1 1 d . . . . .
H12 H 0.8487 0.4519 0.0921 0.058 Uiso 1 1 calc R U . . .
C24 C 0.8281(2) 0.80232(14) 0.00958(12) 0.0442(4) Uani 1 1 d . . . . .
H24 H 0.7351 0.8044 -0.0149 0.053 Uiso 1 1 calc R U . . .
C9 C 0.3005(2) 0.75776(15) 0.69177(11) 0.0479(4) Uani 1 1 d . . . . .
H9 H 0.2809 0.7680 0.7495 0.058 Uiso 1 1 calc R U . . .
C34 C 0.7625(2) 0.72024(14) 0.43384(12) 0.0452(4) Uani 1 1 d . . . . .
H34 H 0.7512 0.6598 0.4163 0.054 Uiso 1 1 calc R U . . .
C18 C 0.7274(2) 0.59883(16) -0.02970(12) 0.0482(4) Uani 1 1 d . . . . .
H18 H 0.8319 0.5853 -0.0313 0.058 Uiso 1 1 calc R U . . .
C43 C 0.7389(3) 0.99574(15) 0.18180(13) 0.0512(5) Uani 1 1 d . . . . .
H43 H 0.8177 1.0235 0.1960 0.061 Uiso 1 1 calc R U . . .
C28 C 1.01661(19) 0.73346(14) 0.11765(13) 0.0455(4) Uani 1 1 d . . . . .
H28 H 1.0524 0.6884 0.1657 0.055 Uiso 1 1 calc R U . . .
C21 C 0.4166(2) 0.63961(16) -0.02648(13) 0.0515(5) Uani 1 1 d . . . . .
H21 H 0.3120 0.6538 -0.0258 0.062 Uiso 1 1 calc R U . . .
C45 C 0.5110(3) 1.00875(15) 0.10521(12) 0.0534(5) Uani 1 1 d . . . . .
H45 H 0.4349 1.0455 0.0680 0.064 Uiso 1 1 calc R U . . .
C31 C 0.7988(2) 0.89851(16) 0.48577(13) 0.0516(5) Uani 1 1 d . . . . .
H31 H 0.8108 0.9587 0.5034 0.062 Uiso 1 1 calc R U . . .
C39 C 0.2601(2) 1.08078(14) 0.28816(13) 0.0509(5) Uani 1 1 d . . . . .
H39 H 0.2823 1.1418 0.2680 0.061 Uiso 1 1 calc R U . . .
C20 C 0.4927(3) 0.60374(17) -0.09802(12) 0.0560(5) Uani 1 1 d . . . . .
H20 H 0.4396 0.5934 -0.1454 0.067 Uiso 1 1 calc R U . . .
C19 C 0.6476(3) 0.58315(18) -0.09969(12) 0.0582(5) Uani 1 1 d . . . . .
H19 H 0.6986 0.5586 -0.1481 0.070 Uiso 1 1 calc R U . . .
C32 C 0.9113(2) 0.81304(19) 0.50170(14) 0.0581(5) Uani 1 1 d . . . . .
H32 H 0.9994 0.8156 0.5295 0.070 Uiso 1 1 calc R U . . .
C25 C 0.9154(3) 0.86590(16) -0.02639(14) 0.0566(5) Uani 1 1 d . . . . .
H25 H 0.8815 0.9100 -0.0753 0.068 Uiso 1 1 calc R U . . .
C37 C 0.0793(2) 0.98423(17) 0.32776(14) 0.0543(5) Uani 1 1 d . . . . .
H37 H -0.0205 0.9801 0.3346 0.065 Uiso 1 1 calc R U . . .
C26 C 1.0519(2) 0.86403(16) 0.00980(16) 0.0588(6) Uani 1 1 d . . . . .
H26 H 1.1103 0.9069 -0.0143 0.071 Uiso 1 1 calc R U . . .
C33 C 0.8930(2) 0.72354(18) 0.47638(15) 0.0600(5) Uani 1 1 d . . . . .
H33 H 0.9682 0.6654 0.4878 0.072 Uiso 1 1 calc R U . . .
C38 C 0.1127(2) 1.07418(16) 0.29792(14) 0.0572(5) Uani 1 1 d . . . . .
H38 H 0.0355 1.1307 0.2843 0.069 Uiso 1 1 calc R U . . .
C44 C 0.6256(3) 1.05136(15) 0.12741(14) 0.0585(6) Uani 1 1 d . . . . .
H44 H 0.6266 1.1169 0.1059 0.070 Uiso 1 1 calc R U . . .
C15 C 1.0390(2) 0.45932(18) 0.29825(17) 0.0629(6) Uani 1 1 d . . . . .
H15 H 1.0869 0.4615 0.3501 0.076 Uiso 1 1 calc R U . . .
C13 C 0.9923(3) 0.36793(15) 0.18493(19) 0.0680(7) Uani 1 1 d . . . . .
H13 H 1.0081 0.3079 0.1600 0.082 Uiso 1 1 calc R U . . .
C27 C 1.1023(2) 0.79842(16) 0.08206(17) 0.0587(6) Uani 1 1 d . . . . .
H27 H 1.1943 0.7977 0.1070 0.070 Uiso 1 1 calc R U . . .
C14 C 1.0623(3) 0.37109(18) 0.2612(2) 0.0712(7) Uani 1 1 d . . . . .
H14 H 1.1256 0.3134 0.2880 0.085 Uiso 1 1 calc R U . . .
 
loop_
 _atom_site_aniso_label
 _atom_site_aniso_U_11
 _atom_site_aniso_U_22
 _atom_site_aniso_U_33
 _atom_site_aniso_U_23
 _atom_site_aniso_U_13
 _atom_site_aniso_U_12
Ni1 0.02852(14) 0.02664(14) 0.02265(13) -0.00171(10) 0.00082(9) -0.00581(10)
P1 0.03070(19) 0.02398(18) 0.02276(18) -0.00091(13) 0.00214(13) -0.00582(14)
P2 0.02796(18) 0.03088(19) 0.02470(18) -0.00360(14) 0.00193(14) -0.00703(14)
S1 0.0359(2) 0.0383(2) 0.02658(18) -0.00587(14) -0.00018(14) -0.01435(15)
O1 0.0362(6) 0.0292(5) 0.0347(6) -0.0049(4) 0.0067(4) -0.0080(4)
O3 0.0432(7) 0.0718(9) 0.0347(6) 0.0017(6) -0.0097(5) -0.0068(6)
O2 0.0698(9) 0.0550(8) 0.0453(7) -0.0202(6) 0.0127(6) -0.0378(7)
C3 0.0308(7) 0.0313(7) 0.0268(7) -0.0009(6) 0.0030(6) -0.0056(6)
C1 0.0269(7) 0.0293(7) 0.0268(7) -0.0014(6) -0.0016(5) -0.0054(5)
C2 0.0298(7) 0.0277(7) 0.0250(7) 0.0005(5) 0.0013(5) -0.0053(5)
C41 0.0361(8) 0.0296(7) 0.0257(7) -0.0021(6) 0.0049(6) -0.0043(6)
C4 0.0306(7) 0.0333(8) 0.0288(7) 0.0023(6) 0.0023(6) -0.0047(6)
C29 0.0340(8) 0.0331(8) 0.0241(7) -0.0010(6) 0.0020(6) -0.0080(6)
C35 0.0361(8) 0.0306(7) 0.0253(7) -0.0021(6) 0.0015(6) -0.0024(6)
C11 0.0295(7) 0.0324(8) 0.0407(8) -0.0002(6) 0.0095(6) -0.0063(6)
C6 0.0344(8) 0.0318(8) 0.0364(8) -0.0011(6) 0.0005(6) -0.0118(6)
C5 0.0375(8) 0.0327(8) 0.0344(8) 0.0052(6) 0.0042(6) -0.0103(6)
C23 0.0306(7) 0.0327(8) 0.0317(8) -0.0028(6) 0.0052(6) -0.0063(6)
C42 0.0430(9) 0.0390(9) 0.0337(8) -0.0039(7) 0.0033(7) -0.0117(7)
C10 0.0491(10) 0.0442(9) 0.0298(8) 0.0029(7) 0.0091(7) -0.0107(7)
C7 0.0511(10) 0.0372(8) 0.0331(8) -0.0066(7) 0.0115(7) -0.0154(7)
C17 0.0406(8) 0.0413(9) 0.0274(7) -0.0056(6) 0.0024(6) -0.0154(7)
C40 0.0435(9) 0.0308(8) 0.0377(9) -0.0023(6) 0.0060(7) -0.0033(7)
C30 0.0430(9) 0.0373(8) 0.0369(9) -0.0063(7) -0.0014(7) -0.0102(7)
C46 0.0450(9) 0.0432(9) 0.0326(8) 0.0009(7) -0.0019(7) -0.0046(7)
C36 0.0376(9) 0.0413(9) 0.0465(10) 0.0018(7) -0.0030(7) -0.0071(7)
C22 0.0406(9) 0.0467(9) 0.0332(8) -0.0069(7) -0.0014(7) -0.0105(7)
C8 0.0639(12) 0.0457(10) 0.0379(9) -0.0147(8) 0.0122(8) -0.0188(9)
C16 0.0420(9) 0.0439(10) 0.0491(10) 0.0077(8) -0.0043(8) -0.0100(7)
C12 0.0515(11) 0.0366(9) 0.0550(11) -0.0073(8) 0.0198(9) -0.0090(8)
C24 0.0463(10) 0.0426(9) 0.0420(9) 0.0047(7) -0.0028(7) -0.0110(8)
C9 0.0622(12) 0.0542(11) 0.0279(8) -0.0083(8) 0.0120(8) -0.0134(9)
C34 0.0462(10) 0.0383(9) 0.0483(10) -0.0049(8) -0.0085(8) -0.0032(7)
C18 0.0506(11) 0.0661(12) 0.0355(9) -0.0177(8) 0.0102(8) -0.0244(9)
C43 0.0654(12) 0.0452(10) 0.0498(11) -0.0066(8) 0.0131(9) -0.0272(9)
C28 0.0325(8) 0.0465(10) 0.0546(11) 0.0084(8) -0.0011(7) -0.0093(7)
C21 0.0473(10) 0.0595(12) 0.0495(11) -0.0073(9) -0.0139(8) -0.0143(9)
C45 0.0662(13) 0.0440(10) 0.0383(10) 0.0101(8) 0.0011(9) 0.0046(9)
C31 0.0550(11) 0.0564(12) 0.0502(11) -0.0152(9) -0.0050(9) -0.0222(9)
C39 0.0608(12) 0.0312(9) 0.0529(11) 0.0029(8) 0.0046(9) 0.0017(8)
C20 0.0769(15) 0.0646(13) 0.0336(9) -0.0069(9) -0.0142(9) -0.0290(11)
C19 0.0787(15) 0.0771(15) 0.0299(9) -0.0191(9) 0.0100(9) -0.0349(12)
C32 0.0430(10) 0.0793(15) 0.0547(12) -0.0116(11) -0.0109(9) -0.0166(10)
C25 0.0676(13) 0.0486(11) 0.0508(11) 0.0122(9) 0.0057(10) -0.0160(10)
C37 0.0363(9) 0.0591(12) 0.0601(12) 0.0012(10) -0.0056(8) 0.0015(8)
C26 0.0499(11) 0.0472(11) 0.0784(15) 0.0082(10) 0.0183(10) -0.0176(9)
C33 0.0456(11) 0.0624(13) 0.0641(13) -0.0051(10) -0.0158(9) 0.0041(9)
C38 0.0537(12) 0.0462(11) 0.0576(12) 0.0041(9) -0.0042(9) 0.0136(9)
C44 0.0863(16) 0.0352(10) 0.0509(11) 0.0066(8) 0.0160(11) -0.0135(10)
C15 0.0429(11) 0.0637(14) 0.0746(15) 0.0254(11) -0.0103(10) -0.0106(9)
C13 0.0704(15) 0.0315(10) 0.0943(19) -0.0016(10) 0.0382(14) -0.0011(9)
C27 0.0329(9) 0.0547(12) 0.0864(16) 0.0093(11) 0.0012(9) -0.0135(8)
C14 0.0486(12) 0.0508(13) 0.098(2) 0.0230(13) 0.0121(12) 0.0061(9)
 
_geom_special_details
;
 All esds (except the esd in the dihedral angle between two l.s. planes)
 are estimated using the full covariance matrix.  The cell esds are taken
 into account individually in the estimation of esds in distances, angles
 and torsion angles; correlations between esds in cell parameters are only
 used when they are defined by crystal symmetry.  An approximate (isotropic)
 treatment of cell esds is used for estimating esds involving l.s. planes.
;
 
loop_
 _geom_bond_atom_site_label_1
 _geom_bond_atom_site_label_2
 _geom_bond_distance
 _geom_bond_site_symmetry_2
 _geom_bond_publ_flag
Ni1 C41 1.8873(15) . ?
Ni1 O1 1.9553(11) . ?
Ni1 P2 2.2100(4) . ?
Ni1 P1 2.2221(4) . ?
P1 C35 1.8213(15) . ?
P1 C29 1.8307(16) . ?
P1 C2 1.8471(14) . ?
P2 C17 1.8118(17) . ?
P2 C11 1.8283(16) . ?
P2 C23 1.8309(15) . ?
S1 O2 1.4352(13) . ?
S1 O3 1.4397(13) . ?
S1 O1 1.4934(11) . ?
S1 C1 1.7864(15) . ?
C3 C7 1.415(2) . ?
C3 C4 1.425(2) . ?
C3 C2 1.440(2) . ?
C1 C2 1.383(2) . ?
C1 C6 1.412(2) . ?
C41 C46 1.393(2) . ?
C41 C42 1.394(2) . ?
C4 C5 1.407(2) . ?
C4 C10 1.414(2) . ?
C29 C34 1.390(2) . ?
C29 C30 1.390(2) . ?
C35 C40 1.393(2) . ?
C35 C36 1.393(2) . ?
C11 C12 1.386(2) . ?
C11 C16 1.390(3) . ?
C6 C5 1.357(2) . ?
C6 H6 0.9300 . ?
C5 H5 0.9300 . ?
C23 C28 1.380(2) . ?
C23 C24 1.392(2) . ?
C42 C43 1.390(3) . ?
C42 H42 0.9300 . ?
C10 C9 1.359(3) . ?
C10 H10 0.9300 . ?
C7 C8 1.366(2) . ?
C7 H7 0.9300 . ?
C17 C22 1.389(2) . ?
C17 C18 1.397(2) . ?
C40 C39 1.388(2) . ?
C40 H40 0.9300 . ?
C30 C31 1.382(3) . ?
C30 H30 0.9300 . ?
C46 C45 1.390(3) . ?
C46 H46 0.9300 . ?
C36 C37 1.387(3) . ?
C36 H36 0.9300 . ?
C22 C21 1.388(2) . ?
C22 H22 0.9300 . ?
C8 C9 1.400(3) . ?
C8 H8 0.9300 . ?
C16 C15 1.384(3) . ?
C16 H16 0.9300 . ?
C12 C13 1.406(3) . ?
C12 H12 0.9300 . ?
C24 C25 1.385(3) . ?
C24 H24 0.9300 . ?
C9 H9 0.9300 . ?
C34 C33 1.386(3) . ?
C34 H34 0.9300 . ?
C18 C19 1.383(3) . ?
C18 H18 0.9300 . ?
C43 C44 1.379(3) . ?
C43 H43 0.9300 . ?
C28 C27 1.385(3) . ?
C28 H28 0.9300 . ?
C21 C20 1.375(3) . ?
C21 H21 0.9300 . ?
C45 C44 1.379(3) . ?
C45 H45 0.9300 . ?
C31 C32 1.375(3) . ?
C31 H31 0.9300 . ?
C39 C38 1.375(3) . ?
C39 H39 0.9300 . ?
C20 C19 1.377(3) . ?
C20 H20 0.9300 . ?
C19 H19 0.9300 . ?
C32 C33 1.379(3) . ?
C32 H32 0.9300 . ?
C25 C26 1.371(3) . ?
C25 H25 0.9300 . ?
C37 C38 1.374(3) . ?
C37 H37 0.9300 . ?
C26 C27 1.378(3) . ?
C26 H26 0.9300 . ?
C33 H33 0.9300 . ?
C38 H38 0.9300 . ?
C44 H44 0.9300 . ?
C15 C14 1.369(4) . ?
C15 H15 0.9300 . ?
C13 C14 1.366(4) . ?
C13 H13 0.9300 . ?
C27 H27 0.9300 . ?
C14 H14 0.9300 . ?
 
loop_
 _geom_angle_atom_site_label_1
 _geom_angle_atom_site_label_2
 _geom_angle_atom_site_label_3
 _geom_angle
 _geom_angle_site_symmetry_1
 _geom_angle_site_symmetry_3
 _geom_angle_publ_flag
C41 Ni1 O1 174.92(6) . . ?
C41 Ni1 P2 89.62(5) . . ?
O1 Ni1 P2 89.47(3) . . ?
C41 Ni1 P1 88.18(5) . . ?
O1 Ni1 P1 93.63(3) . . ?
P2 Ni1 P1 169.070(18) . . ?
C35 P1 C29 111.35(7) . . ?
C35 P1 C2 103.88(7) . . ?
C29 P1 C2 102.69(7) . . ?
C35 P1 Ni1 118.54(5) . . ?
C29 P1 Ni1 102.99(5) . . ?
C2 P1 Ni1 116.41(5) . . ?
C17 P2 C11 107.78(8) . . ?
C17 P2 C23 103.04(7) . . ?
C11 P2 C23 105.09(7) . . ?
C17 P2 Ni1 113.34(6) . . ?
C11 P2 Ni1 107.88(5) . . ?
C23 P2 Ni1 118.98(5) . . ?
O2 S1 O3 117.20(9) . . ?
O2 S1 O1 110.49(8) . . ?
O3 S1 O1 111.10(7) . . ?
O2 S1 C1 106.46(7) . . ?
O3 S1 C1 105.20(7) . . ?
O1 S1 C1 105.47(7) . . ?
S1 O1 Ni1 114.11(6) . . ?
C7 C3 C4 117.34(14) . . ?
C7 C3 C2 123.97(14) . . ?
C4 C3 C2 118.67(14) . . ?
C2 C1 C6 121.86(14) . . ?
C2 C1 S1 122.03(11) . . ?
C6 C1 S1 116.08(12) . . ?
C1 C2 C3 118.59(13) . . ?
C1 C2 P1 119.68(11) . . ?
C3 C2 P1 121.69(11) . . ?
C46 C41 C42 117.83(15) . . ?
C46 C41 Ni1 117.07(13) . . ?
C42 C41 Ni1 125.10(12) . . ?
C5 C4 C10 120.52(14) . . ?
C5 C4 C3 119.77(14) . . ?
C10 C4 C3 119.71(15) . . ?
C34 C29 C30 118.48(15) . . ?
C34 C29 P1 114.73(12) . . ?
C30 C29 P1 126.64(12) . . ?
C40 C35 C36 118.72(15) . . ?
C40 C35 P1 122.02(12) . . ?
C36 C35 P1 118.80(12) . . ?
C12 C11 C16 118.49(17) . . ?
C12 C11 P2 124.16(15) . . ?
C16 C11 P2 117.33(13) . . ?
C5 C6 C1 119.79(15) . . ?
C5 C6 H6 120.1 . . ?
C1 C6 H6 120.1 . . ?
C6 C5 C4 121.20(14) . . ?
C6 C5 H5 119.4 . . ?
C4 C5 H5 119.4 . . ?
C28 C23 C24 118.91(15) . . ?
C28 C23 P2 122.00(13) . . ?
C24 C23 P2 118.77(13) . . ?
C43 C42 C41 120.87(17) . . ?
C43 C42 H42 119.6 . . ?
C41 C42 H42 119.6 . . ?
C9 C10 C4 120.95(16) . . ?
C9 C10 H10 119.5 . . ?
C4 C10 H10 119.5 . . ?
C8 C7 C3 121.15(16) . . ?
C8 C7 H7 119.4 . . ?
C3 C7 H7 119.4 . . ?
C22 C17 C18 119.24(16) . . ?
C22 C17 P2 119.34(12) . . ?
C18 C17 P2 121.35(14) . . ?
C39 C40 C35 120.32(17) . . ?
C39 C40 H40 119.8 . . ?
C35 C40 H40 119.8 . . ?
C31 C30 C29 120.48(17) . . ?
C31 C30 H30 119.8 . . ?
C29 C30 H30 119.8 . . ?
C45 C46 C41 120.95(18) . . ?
C45 C46 H46 119.5 . . ?
C41 C46 H46 119.5 . . ?
C37 C36 C35 120.33(17) . . ?
C37 C36 H36 119.8 . . ?
C35 C36 H36 119.8 . . ?
C21 C22 C17 120.03(17) . . ?
C21 C22 H22 120.0 . . ?
C17 C22 H22 120.0 . . ?
C7 C8 C9 121.07(17) . . ?
C7 C8 H8 119.5 . . ?
C9 C8 H8 119.5 . . ?
C15 C16 C11 121.0(2) . . ?
C15 C16 H16 119.5 . . ?
C11 C16 H16 119.5 . . ?
C11 C12 C13 119.8(2) . . ?
C11 C12 H12 120.1 . . ?
C13 C12 H12 120.1 . . ?
C25 C24 C23 120.38(18) . . ?
C25 C24 H24 119.8 . . ?
C23 C24 H24 119.8 . . ?
C10 C9 C8 119.65(16) . . ?
C10 C9 H9 120.2 . . ?
C8 C9 H9 120.2 . . ?
C33 C34 C29 120.76(18) . . ?
C33 C34 H34 119.6 . . ?
C29 C34 H34 119.6 . . ?
C19 C18 C17 120.01(19) . . ?
C19 C18 H18 120.0 . . ?
C17 C18 H18 120.0 . . ?
C44 C43 C42 120.56(19) . . ?
C44 C43 H43 119.7 . . ?
C42 C43 H43 119.7 . . ?
C23 C28 C27 120.34(18) . . ?
C23 C28 H28 119.8 . . ?
C27 C28 H28 119.8 . . ?
C20 C21 C22 120.26(19) . . ?
C20 C21 H21 119.9 . . ?
C22 C21 H21 119.9 . . ?
C44 C45 C46 120.50(18) . . ?
C44 C45 H45 119.7 . . ?
C46 C45 H45 119.7 . . ?
C32 C31 C30 120.50(18) . . ?
C32 C31 H31 119.7 . . ?
C30 C31 H31 119.7 . . ?
C38 C39 C40 120.26(18) . . ?
C38 C39 H39 119.9 . . ?
C40 C39 H39 119.9 . . ?
C21 C20 C19 120.15(17) . . ?
C21 C20 H20 119.9 . . ?
C19 C20 H20 119.9 . . ?
C20 C19 C18 120.30(18) . . ?
C20 C19 H19 119.8 . . ?
C18 C19 H19 119.8 . . ?
C31 C32 C33 119.79(18) . . ?
C31 C32 H32 120.1 . . ?
C33 C32 H32 120.1 . . ?
C26 C25 C24 120.20(19) . . ?
C26 C25 H25 119.9 . . ?
C24 C25 H25 119.9 . . ?
C38 C37 C36 120.26(19) . . ?
C38 C37 H37 119.9 . . ?
C36 C37 H37 119.9 . . ?
C25 C26 C27 119.84(18) . . ?
C25 C26 H26 120.1 . . ?
C27 C26 H26 120.1 . . ?
C32 C33 C34 119.98(19) . . ?
C32 C33 H33 120.0 . . ?
C34 C33 H33 120.0 . . ?
C37 C38 C39 120.10(17) . . ?
C37 C38 H38 119.9 . . ?
C39 C38 H38 119.9 . . ?
C43 C44 C45 119.26(18) . . ?
C43 C44 H44 120.4 . . ?
C45 C44 H44 120.4 . . ?
C14 C15 C16 120.2(2) . . ?
C14 C15 H15 119.9 . . ?
C16 C15 H15 119.9 . . ?
C14 C13 C12 120.6(2) . . ?
C14 C13 H13 119.7 . . ?
C12 C13 H13 119.7 . . ?
C26 C27 C28 120.3(2) . . ?
C26 C27 H27 119.8 . . ?
C28 C27 H27 119.8 . . ?
C13 C14 C15 119.9(2) . . ?
C13 C14 H14 120.1 . . ?
C15 C14 H14 120.1 . . ?
 
loop_
 _geom_torsion_atom_site_label_1
 _geom_torsion_atom_site_label_2
 _geom_torsion_atom_site_label_3
 _geom_torsion_atom_site_label_4
 _geom_torsion
 _geom_torsion_site_symmetry_1
 _geom_torsion_site_symmetry_2
 _geom_torsion_site_symmetry_3
 _geom_torsion_site_symmetry_4
 _geom_torsion_publ_flag
O2 S1 O1 Ni1 161.16(7) . . . . ?
O3 S1 O1 Ni1 29.30(10) . . . . ?
C1 S1 O1 Ni1 -84.18(8) . . . . ?
O2 S1 C1 C2 174.64(13) . . . . ?
O3 S1 C1 C2 -60.31(14) . . . . ?
O1 S1 C1 C2 57.22(14) . . . . ?
O2 S1 C1 C6 -7.15(14) . . . . ?
O3 S1 C1 C6 117.89(12) . . . . ?
O1 S1 C1 C6 -124.57(12) . . . . ?
C6 C1 C2 C3 -2.5(2) . . . . ?
S1 C1 C2 C3 175.59(11) . . . . ?
C6 C1 C2 P1 175.16(11) . . . . ?
S1 C1 C2 P1 -6.74(17) . . . . ?
C7 C3 C2 C1 -174.32(15) . . . . ?
C4 C3 C2 C1 4.1(2) . . . . ?
C7 C3 C2 P1 8.1(2) . . . . ?
C4 C3 C2 P1 -173.53(11) . . . . ?
C35 P1 C2 C1 116.50(12) . . . . ?
C29 P1 C2 C1 -127.40(12) . . . . ?
Ni1 P1 C2 C1 -15.74(14) . . . . ?
C35 P1 C2 C3 -65.91(13) . . . . ?
C29 P1 C2 C3 50.19(13) . . . . ?
Ni1 P1 C2 C3 161.85(10) . . . . ?
P2 Ni1 C41 C46 95.34(12) . . . . ?
P1 Ni1 C41 C46 -95.37(12) . . . . ?
P2 Ni1 C41 C42 -84.60(14) . . . . ?
P1 Ni1 C41 C42 84.69(14) . . . . ?
C7 C3 C4 C5 175.58(15) . . . . ?
C2 C3 C4 C5 -2.9(2) . . . . ?
C7 C3 C4 C10 -4.2(2) . . . . ?
C2 C3 C4 C10 177.32(14) . . . . ?
C35 P1 C29 C34 178.09(13) . . . . ?
C2 P1 C29 C34 67.48(14) . . . . ?
Ni1 P1 C29 C34 -53.84(13) . . . . ?
C35 P1 C29 C30 -6.39(16) . . . . ?
C2 P1 C29 C30 -117.00(14) . . . . ?
Ni1 P1 C29 C30 121.68(14) . . . . ?
C29 P1 C35 C40 50.26(15) . . . . ?
C2 P1 C35 C40 160.10(13) . . . . ?
Ni1 P1 C35 C40 -68.91(15) . . . . ?
C29 P1 C35 C36 -137.64(13) . . . . ?
C2 P1 C35 C36 -27.79(15) . . . . ?
Ni1 P1 C35 C36 103.20(13) . . . . ?
C17 P2 C11 C12 7.40(16) . . . . ?
C23 P2 C11 C12 -101.99(15) . . . . ?
Ni1 P2 C11 C12 130.12(13) . . . . ?
C17 P2 C11 C16 -170.85(13) . . . . ?
C23 P2 C11 C16 79.77(14) . . . . ?
Ni1 P2 C11 C16 -48.13(14) . . . . ?
C2 C1 C6 C5 -0.4(2) . . . . ?
S1 C1 C6 C5 -178.57(12) . . . . ?
C1 C6 C5 C4 1.6(2) . . . . ?
C10 C4 C5 C6 179.82(16) . . . . ?
C3 C4 C5 C6 0.1(2) . . . . ?
C17 P2 C23 C28 -149.77(15) . . . . ?
C11 P2 C23 C28 -37.00(16) . . . . ?
Ni1 P2 C23 C28 83.85(15) . . . . ?
C17 P2 C23 C24 36.85(15) . . . . ?
C11 P2 C23 C24 149.63(14) . . . . ?
Ni1 P2 C23 C24 -89.52(14) . . . . ?
C46 C41 C42 C43 1.3(2) . . . . ?
Ni1 C41 C42 C43 -178.81(13) . . . . ?
C5 C4 C10 C9 -176.75(17) . . . . ?
C3 C4 C10 C9 3.0(3) . . . . ?
C4 C3 C7 C8 2.3(3) . . . . ?
C2 C3 C7 C8 -179.29(17) . . . . ?
C11 P2 C17 C22 119.58(14) . . . . ?
C23 P2 C17 C22 -129.63(14) . . . . ?
Ni1 P2 C17 C22 0.27(16) . . . . ?
C11 P2 C17 C18 -63.45(17) . . . . ?
C23 P2 C17 C18 47.33(17) . . . . ?
Ni1 P2 C17 C18 177.24(14) . . . . ?
C36 C35 C40 C39 0.6(3) . . . . ?
P1 C35 C40 C39 172.73(14) . . . . ?
C34 C29 C30 C31 0.1(3) . . . . ?
P1 C29 C30 C31 -175.30(14) . . . . ?
C42 C41 C46 C45 -1.8(2) . . . . ?
Ni1 C41 C46 C45 178.22(14) . . . . ?
C40 C35 C36 C37 -0.9(3) . . . . ?
P1 C35 C36 C37 -173.25(15) . . . . ?
C18 C17 C22 C21 -0.7(3) . . . . ?
P2 C17 C22 C21 176.33(15) . . . . ?
C3 C7 C8 C9 0.9(3) . . . . ?
C12 C11 C16 C15 1.6(3) . . . . ?
P2 C11 C16 C15 179.98(15) . . . . ?
C16 C11 C12 C13 -1.3(3) . . . . ?
P2 C11 C12 C13 -179.52(14) . . . . ?
C28 C23 C24 C25 0.1(3) . . . . ?
P2 C23 C24 C25 173.67(16) . . . . ?
C4 C10 C9 C8 0.2(3) . . . . ?
C7 C8 C9 C10 -2.2(3) . . . . ?
C30 C29 C34 C33 0.2(3) . . . . ?
P1 C29 C34 C33 176.13(17) . . . . ?
C22 C17 C18 C19 0.0(3) . . . . ?
P2 C17 C18 C19 -177.00(16) . . . . ?
C41 C42 C43 C44 0.4(3) . . . . ?
C24 C23 C28 C27 0.9(3) . . . . ?
P2 C23 C28 C27 -172.45(17) . . . . ?
C17 C22 C21 C20 0.9(3) . . . . ?
C41 C46 C45 C44 0.8(3) . . . . ?
C29 C30 C31 C32 0.2(3) . . . . ?
C35 C40 C39 C38 -0.2(3) . . . . ?
C22 C21 C20 C19 -0.4(3) . . . . ?
C21 C20 C19 C18 -0.3(3) . . . . ?
C17 C18 C19 C20 0.5(3) . . . . ?
C30 C31 C32 C33 -0.7(3) . . . . ?
C23 C24 C25 C26 -0.6(3) . . . . ?
C35 C36 C37 C38 0.7(3) . . . . ?
C24 C25 C26 C27 0.2(4) . . . . ?
C31 C32 C33 C34 1.0(4) . . . . ?
C29 C34 C33 C32 -0.7(3) . . . . ?
C36 C37 C38 C39 -0.3(3) . . . . ?
C40 C39 C38 C37 0.1(3) . . . . ?
C42 C43 C44 C45 -1.4(3) . . . . ?
C46 C45 C44 C43 0.8(3) . . . . ?
C11 C16 C15 C14 -1.1(3) . . . . ?
C11 C12 C13 C14 0.4(3) . . . . ?
C25 C26 C27 C28 0.8(4) . . . . ?
C23 C28 C27 C26 -1.4(3) . . . . ?
C12 C13 C14 C15 0.1(3) . . . . ?
C16 C15 C14 C13 0.2(3) . . . . ?
 
_refine_diff_density_max    0.314
_refine_diff_density_min   -0.429
_refine_diff_density_rms    0.048

_shelxl_version_number 2013-4

_shelx_res_file
;
TITL wzx-ph2_a.res in P-1
CELL  1.54184   9.1365  13.7655  15.5272   83.902   88.918   76.670
ZERR     2.00   0.0003   0.0004   0.0006    0.003    0.003    0.002
LATT   1
SFAC  C    H    O    P    NI   S
UNIT  92   72   6    4    2    2
MERG   2
MORE -1
FMAP   2
PLAN    9
SIZE     0.21   0.22   0.25
ACTA
BOND   $H
CONF
LIST   6
L.S.   4
WGHT    0.047400    0.577200
FVAR       0.53316
NI1   5    0.600799    0.724925    0.237813    11.00000    0.02852    0.02664 =
         0.02265   -0.00171    0.00082   -0.00581
P1    4    0.489950    0.789665    0.354113    11.00000    0.03070    0.02398 =
         0.02276   -0.00091    0.00214   -0.00582
P2    4    0.751139    0.662143    0.134249    11.00000    0.02796    0.03088 =
         0.02470   -0.00360    0.00193   -0.00703
S1    6    0.408001    0.589497    0.293427    11.00000    0.03588    0.03832 =
         0.02658   -0.00587   -0.00018   -0.01435
O1    3    0.568192    0.591150    0.274073    11.00000    0.03618    0.02921 =
         0.03465   -0.00493    0.00670   -0.00805
O3    3    0.306933    0.669903    0.242532    11.00000    0.04316    0.07176 =
         0.03470    0.00171   -0.00969   -0.00678
O2    3    0.384905    0.490086    0.291587    11.00000    0.06976    0.05500 =
         0.04531   -0.02020    0.01266   -0.03782
C3    1    0.368788    0.726638    0.517469    11.00000    0.03081    0.03128 =
         0.02677   -0.00087    0.00305   -0.00557
C1    1    0.379438    0.618218    0.402882    11.00000    0.02691    0.02933 =
         0.02679   -0.00140   -0.00162   -0.00544
C2    1    0.404770    0.705628    0.429640    11.00000    0.02979    0.02767 =
         0.02495    0.00048    0.00127   -0.00525
C41   1    0.619723    0.854938    0.194900    11.00000    0.03613    0.02959 =
         0.02571   -0.00208    0.00486   -0.00427
C4    1    0.317990    0.653494    0.574799    11.00000    0.03063    0.03332 =
         0.02882    0.00232    0.00230   -0.00472
C29   1    0.648234    0.806189    0.417082    11.00000    0.03404    0.03308 =
         0.02407   -0.00097    0.00196   -0.00802
C35   1    0.343866    0.905107    0.338764    11.00000    0.03605    0.03062 =
         0.02533   -0.00215    0.00149   -0.00237
C11   1    0.873605    0.544392    0.180562    11.00000    0.02954    0.03240 =
         0.04073   -0.00019    0.00949   -0.00631
C6    1    0.325198    0.547821    0.460016    11.00000    0.03442    0.03178 =
         0.03636   -0.00113    0.00046   -0.01183
AFIX  43
H6    2    0.308593    0.489797    0.440249    11.00000   -1.20000
AFIX   0
C5    1    0.297384    0.565104    0.543843    11.00000    0.03748    0.03267 =
         0.03444    0.00516    0.00418   -0.01027
AFIX  43
H5    2    0.264095    0.517673    0.581530    11.00000   -1.20000
AFIX   0
C23   1    0.878500    0.735282    0.082221    11.00000    0.03056    0.03270 =
         0.03171   -0.00279    0.00516   -0.00628
C42   1    0.736180    0.898513    0.215572    11.00000    0.04304    0.03898 =
         0.03369   -0.00387    0.00326   -0.01173
AFIX  43
H42   2    0.813089    0.862059    0.252444    11.00000   -1.20000
AFIX   0
C10   1    0.288088    0.670530    0.662292    11.00000    0.04911    0.04419 =
         0.02982    0.00290    0.00906   -0.01069
AFIX  43
H10   2    0.259478    0.621320    0.700207    11.00000   -1.20000
AFIX   0
C7    1    0.377203    0.817187    0.550436    11.00000    0.05107    0.03722 =
         0.03307   -0.00661    0.01155   -0.01536
AFIX  43
H7    2    0.406486    0.867394    0.514058    11.00000   -1.20000
AFIX   0
C17   1    0.651219    0.634900    0.043403    11.00000    0.04057    0.04135 =
         0.02742   -0.00564    0.00239   -0.01543
C40   1    0.375900    0.996746    0.308267    11.00000    0.04347    0.03079 =
         0.03769   -0.00234    0.00595   -0.00329
AFIX  43
H40   2    0.475356    1.001654    0.301342    11.00000   -1.20000
AFIX   0
C30   1    0.668100    0.895618    0.443703    11.00000    0.04296    0.03735 =
         0.03692   -0.00628   -0.00141   -0.01022
AFIX  43
H30   2    0.592913    0.953915    0.433131    11.00000   -1.20000
AFIX   0
C46   1    0.508205    0.911255    0.138090    11.00000    0.04498    0.04321 =
         0.03264    0.00086   -0.00191   -0.00457
AFIX  43
H46   2    0.430825    0.883207    0.121942    11.00000   -1.20000
AFIX   0
C36   1    0.193915    0.899510    0.347770    11.00000    0.03758    0.04129 =
         0.04654    0.00181   -0.00298   -0.00712
AFIX  43
H36   2    0.170525    0.838679    0.367296    11.00000   -1.20000
AFIX   0
C22   1    0.495118    0.654677    0.044711    11.00000    0.04058    0.04674 =
         0.03317   -0.00690   -0.00144   -0.01048
AFIX  43
H22   2    0.443217    0.678021    0.093294    11.00000   -1.20000
AFIX   0
C8    1    0.343073    0.832131    0.634743    11.00000    0.06389    0.04573 =
         0.03795   -0.01471    0.01224   -0.01883
AFIX  43
H8    2    0.348156    0.892680    0.654600    11.00000   -1.20000
AFIX   0
C16   1    0.944529    0.545239    0.258794    11.00000    0.04201    0.04391 =
         0.04915    0.00769   -0.00434   -0.01005
AFIX  43
H16   2    0.928229    0.604460    0.285025    11.00000   -1.20000
AFIX   0
C12   1    0.896507    0.454680    0.143774    11.00000    0.05151    0.03656 =
         0.05496   -0.00730    0.01980   -0.00904
AFIX  43
H12   2    0.848700    0.451875    0.092050    11.00000   -1.20000
AFIX   0
C24   1    0.828058    0.802322    0.009578    11.00000    0.04628    0.04261 =
         0.04205    0.00472   -0.00282   -0.01099
AFIX  43
H24   2    0.735139    0.804404   -0.014920    11.00000   -1.20000
AFIX   0
C9    1    0.300550    0.757756    0.691766    11.00000    0.06216    0.05424 =
         0.02792   -0.00834    0.01200   -0.01345
AFIX  43
H9    2    0.280944    0.768013    0.749503    11.00000   -1.20000
AFIX   0
C34   1    0.762466    0.720238    0.433839    11.00000    0.04623    0.03826 =
         0.04829   -0.00495   -0.00851   -0.00320
AFIX  43
H34   2    0.751199    0.659827    0.416304    11.00000   -1.20000
AFIX   0
C18   1    0.727436    0.598828   -0.029698    11.00000    0.05062    0.06610 =
         0.03552   -0.01768    0.01015   -0.02436
AFIX  43
H18   2    0.831928    0.585350   -0.031315    11.00000   -1.20000
AFIX   0
C43   1    0.738873    0.995738    0.181801    11.00000    0.06542    0.04523 =
         0.04977   -0.00660    0.01314   -0.02723
AFIX  43
H43   2    0.817740    1.023496    0.196024    11.00000   -1.20000
AFIX   0
C28   1    1.016606    0.733465    0.117652    11.00000    0.03250    0.04654 =
         0.05458    0.00838   -0.00111   -0.00930
AFIX  43
H28   2    1.052350    0.688403    0.165673    11.00000   -1.20000
AFIX   0
C21   1    0.416553    0.639608   -0.026478    11.00000    0.04731    0.05948 =
         0.04946   -0.00726   -0.01390   -0.01425
AFIX  43
H21   2    0.311992    0.653828   -0.025779    11.00000   -1.20000
AFIX   0
C45   1    0.510959    1.008750    0.105212    11.00000    0.06622    0.04402 =
         0.03830    0.01008    0.00106    0.00462
AFIX  43
H45   2    0.434862    1.045519    0.067958    11.00000   -1.20000
AFIX   0
C31   1    0.798794    0.898509    0.485767    11.00000    0.05498    0.05641 =
         0.05018   -0.01518   -0.00500   -0.02218
AFIX  43
H31   2    0.810754    0.958704    0.503428    11.00000   -1.20000
AFIX   0
C39   1    0.260141    1.080775    0.288160    11.00000    0.06076    0.03121 =
         0.05290    0.00295    0.00458    0.00172
AFIX  43
H39   2    0.282343    1.141792    0.268002    11.00000   -1.20000
AFIX   0
C20   1    0.492730    0.603739   -0.098020    11.00000    0.07691    0.06463 =
         0.03363   -0.00690   -0.01415   -0.02901
AFIX  43
H20   2    0.439589    0.593361   -0.145389    11.00000   -1.20000
AFIX   0
C19   1    0.647558    0.583147   -0.099687    11.00000    0.07869    0.07706 =
         0.02994   -0.01913    0.00998   -0.03492
AFIX  43
H19   2    0.698609    0.558588   -0.148098    11.00000   -1.20000
AFIX   0
C32   1    0.911283    0.813038    0.501702    11.00000    0.04304    0.07926 =
         0.05472   -0.01156   -0.01091   -0.01664
AFIX  43
H32   2    0.999409    0.815612    0.529465    11.00000   -1.20000
AFIX   0
C25   1    0.915442    0.865905   -0.026394    11.00000    0.06757    0.04860 =
         0.05080    0.01223    0.00570   -0.01601
AFIX  43
H25   2    0.881469    0.910016   -0.075261    11.00000   -1.20000
AFIX   0
C37   1    0.079331    0.984226    0.327757    11.00000    0.03625    0.05912 =
         0.06009    0.00121   -0.00557    0.00151
AFIX  43
H37   2   -0.020482    0.980114    0.334560    11.00000   -1.20000
AFIX   0
C26   1    1.051866    0.864034    0.009799    11.00000    0.04989    0.04725 =
         0.07840    0.00815    0.01833   -0.01760
AFIX  43
H26   2    1.110271    0.906941   -0.014349    11.00000   -1.20000
AFIX   0
C33   1    0.892971    0.723539    0.476383    11.00000    0.04563    0.06239 =
         0.06407   -0.00509   -0.01576    0.00407
AFIX  43
H33   2    0.968157    0.665400    0.487844    11.00000   -1.20000
AFIX   0
C38   1    0.112734    1.074176    0.297924    11.00000    0.05370    0.04617 =
         0.05757    0.00407   -0.00416    0.01365
AFIX  43
H38   2    0.035531    1.130680    0.284315    11.00000   -1.20000
AFIX   0
C44   1    0.625632    1.051358    0.127407    11.00000    0.08628    0.03515 =
         0.05091    0.00658    0.01595   -0.01351
AFIX  43
H44   2    0.626586    1.116898    0.105921    11.00000   -1.20000
AFIX   0
C15   1    1.039018    0.459320    0.298247    11.00000    0.04290    0.06370 =
         0.07463    0.02538   -0.01026   -0.01058
AFIX  43
H15   2    1.086917    0.461502    0.350089    11.00000   -1.20000
AFIX   0
C13   1    0.992274    0.367925    0.184932    11.00000    0.07044    0.03153 =
         0.09426   -0.00157    0.03821   -0.00115
AFIX  43
H13   2    1.008117    0.307871    0.160000    11.00000   -1.20000
AFIX   0
C27   1    1.102278    0.798419    0.082058    11.00000    0.03294    0.05474 =
         0.08640    0.00925    0.00119   -0.01349
AFIX  43
H27   2    1.194263    0.797743    0.107047    11.00000   -1.20000
AFIX   0
C14   1    1.062258    0.371094    0.261241    11.00000    0.04855    0.05079 =
         0.09841    0.02297    0.01212    0.00608
AFIX  43
H14   2    1.125578    0.313417    0.288003    11.00000   -1.20000
AFIX   0
HKLF    4

REM  wzx-ph2_a.res in P-1
REM R1 =  0.0311 for    6637 Fo > 4sig(Fo)  and  0.0331 for all    7121 data
REM    478 parameters refined using      0 restraints

END

WGHT      0.0474      0.5772

REM Highest difference peak  0.314,  deepest hole -0.429,  1-sigma level  0.048
Q1    1   0.6054  0.8010  0.2069  11.00000  0.05    0.31
Q2    1   0.4038  0.6060  0.3577  11.00000  0.05    0.30
Q3    1   0.8378  0.5953  0.1564  11.00000  0.05    0.27
Q4    1   0.3850  0.7215  0.4685  11.00000  0.05    0.27
Q5    1   0.4063  0.8616  0.3429  11.00000  0.05    0.23
Q6    1   0.4369  0.7398  0.4057  11.00000  0.05    0.23
Q7    1   0.3226  0.5423  0.2739  11.00000  0.05    0.22
Q8    1   0.3417  0.6867  0.5494  11.00000  0.05    0.22
Q9    1   0.6067  0.6419  0.2767  11.00000  0.05    0.21
;
_shelx_res_checksum    4954

_shelx_hkl_file
;
   0   0   2  717.98   15.90
   0   0   3  214.17    5.40
   0   0   4  811.86   18.48
   0   0   5 1617.92   35.98
   0   0  -6    0.87    0.23
   0   0   6    0.32    0.27
   0   0   7  593.10   14.63
   0   0   8  107.21    4.12
   0   0   9  365.07   10.32
   0   0  10   79.10    3.82
   0   0  11   24.24    1.67
   0   0  11   26.61    2.20
   0   0  11   25.32    1.74
   0   0  12   27.05    1.86
   0   0  12   29.45    2.48
   0   0  12   31.57    2.04
   0   0  13   23.99    2.32
   0   0  13   22.11    1.75
   0   0  14   67.39    3.27
   0   0  15  147.90    5.35
   0   0  16    1.18    0.62
   0   0  17  134.33    4.38
   0   0  17  146.92    4.88
   0   0  18  104.88    3.68
   0  -1  18   85.66    3.15
   0  -1  17   60.34    2.75
   0  -1  17   58.21    2.54
   0  -1  16  140.46    5.00
   0  -1  15    0.90    0.49
   0  -1  14   15.46    1.48
   0  -1  13    9.94    1.16
   0  -1  13   12.25    1.65
   0  -1  13   12.98    1.40
   0  -1  12  167.43    5.63
   0  -1  12  175.69    5.77
   0  -1  12  174.92    6.92
   0  -1  11  248.21    7.27
   0  -1  11  250.69    7.33
   0  -1  11  253.50    8.53
   0  -1  10  109.52    4.72
   0  -1  10  106.03    3.83
   0  -1  10  109.70    3.91
   0  -1   9    2.99    0.72
   0  -1   8  154.13    5.33
   0  -1   7    2.29    0.53
   0  -1   6  380.92    9.84
   0  -1   5   62.94    2.45
   0  -1   4   39.08    1.67
   0  -1   3   11.82    0.74
   0  -1   2   36.02    1.25
   0  -1   1 4456.72   95.46
   0   1   1 2810.04   60.36
   0   1   2  478.23   10.81
   0   1   3   53.67    1.83
   0   1   4 1420.32   31.23
   0   1   4 1398.85   31.24
   0   1   5  778.10   18.06
   0   1   6 1612.15   36.19
   0   1   7 3074.71   67.75
   0   1   8   96.37    3.85
   0   1   9 1253.81   29.51
   0   1  10  285.92    8.85
   0   1  11  221.13    6.88
   0   1  11  243.21    7.04
   0   1  11  233.81    7.94
   0   1  12    3.18    0.75
   0   1  12    2.24    0.76
   0   1  13  111.66    4.39
   0   1  13  103.60    5.15
   0   1  14    1.43    0.69
   0   1  15   61.40    3.14
   0   1  16   18.55    1.60
   0   1  17    9.58    1.09
   0   1  18  177.39    5.40
   0   1  19    1.26    0.33
   0  -2  18  135.23    4.07
   0  -2  18  123.11    3.79
   0  -2  17   18.40    1.36
   0  -2  17   15.04    1.20
   0  -2  16   80.70    3.42
   0  -2  15    0.27    0.53
   0  -2  14    3.10    0.67
   0  -2  14    4.32    0.81
   0  -2  13  127.12    4.76
   0  -2  13  128.16    4.70
   0  -2  12  876.00   23.04
   0  -2  12  873.31   21.02
   0  -2  12  873.67   21.07
   0  -2  11  327.06    9.04
   0  -2  11  336.68   10.67
   0  -2  11  336.41    9.17
   0  -2  10  319.69    9.97
   0  -2  10  311.61    8.52
   0  -2  10  320.24    8.65
   0  -2   9  199.56    6.89
   0  -2   8    0.54    0.38
   0  -2   7  166.15    5.52
   0  -2   6    4.24    0.67
   0  -2   5   26.66    1.54
   0  -2   4    0.93    0.31
   0  -2   3  276.41    6.92
   0  -2   2  988.07   21.93
   0  -2   1  419.90    9.69
   0   2   0  483.82   11.02
   0   2   1    1.34    0.25
   0   2   2 1100.51   24.32
   0  -2  -3 1287.88   27.81
   0   2   3 1296.16   28.52
   0   2   4  587.38   13.75
   0   2   5 2958.45   64.64
   0   2   6 1748.07   39.14
   0   2   7 2261.82   50.47
   0   2   8 3074.42   68.21
   0   2   9  629.95   16.23
   0   2  10  727.19   18.66
   0   2  11   26.65    2.30
   0   2  11   32.17    2.00
   0   2  12    1.74    0.58
   0   2  12    0.30    0.46
   0   2  13  121.79    5.59
   0   2  13  115.53    4.59
   0   2  14   58.73    3.09
   0   2  15  174.26    6.05
   0   2  16    1.21    0.53
   0   2  17   65.50    2.99
   0   2  18    0.86    0.43
   0   2  19   15.23    0.99
   0  -3  18    2.89    0.45
   0  -3  18    2.57    0.41
   0  -3  17   11.23    1.01
   0  -3  17   10.66    0.99
   0  -3  16    6.48    0.88
   0  -3  15    0.68    0.51
   0  -3  14    8.09    1.06
   0  -3  14    7.53    1.04
   0  -3  13   58.97    2.91
   0  -3  13   59.91    2.91
   0  -3  12   35.23    2.13
   0  -3  12   36.49    2.18
   0  -3  12   36.08    2.96
   0  -3  11 1201.68   27.69
   0  -3  11 1186.30   27.61
   0  -3  11 1182.62   29.84
   0  -3  10   45.16    2.24
   0  -3  10   43.78    2.24
   0  -3  10   41.86    2.99
   0  -3   9  247.57    8.25
   0  -3   8  114.76    4.76
   0  -3   7  224.21    7.13
   0  -3   6   64.36    2.95
   0  -3   5   42.51    2.17
   0  -3   4    2.00    0.44
   0  -3   3   33.99    1.64
   0  -3   2  101.54    3.19
   0  -3   1 1785.66   39.21
   0   3   0  638.13   14.68
   0   3   1   86.87    2.74
   0   3   2 2434.22   53.06
   0   3   3 1519.52   33.68
   0   3   4   62.50    2.41
   0   3   5  508.85   12.48
   0  -3  -6  969.28   21.64
   0   3   6 1003.25   22.87
   0   3   7 1195.90   27.80
   0   3   8  358.42   10.12
   0   3   9   42.88    2.65
   0   3  10  434.48   12.45
   0   3  11  192.43    6.14
   0   3  11  188.77    7.06
   0   3  12    5.72    1.06
   0   3  12    6.85    0.98
   0   3  13   68.71    4.08
   0   3  13   67.96    3.33
   0   3  14  439.15   12.08
   0   3  15    0.60    0.47
   0   3  16  117.49    4.52
   0   3  17   16.09    1.36
   0   3  18   11.04    0.99
   0  -3 -18   10.35    1.02
   0  -4  17   25.47    1.41
   0  -4  17   25.58    1.52
   0  -4  16    1.70    0.50
   0  -4  15    2.83    0.62
   0  -4  15    2.89    0.63
   0  -4  14  120.35    4.45
   0  -4  14  118.00    4.40
   0  -4  13   92.67    3.76
   0  -4  13   87.52    3.68
   0  -4  12  636.72   16.02
   0  -4  12  649.46   16.07
   0  -4  11   75.88    3.23
   0  -4  11   75.22    3.22
   0  -4  11   77.11    4.48
   0  -4  10  489.31   12.47
   0  -4  10  494.83   12.49
   0  -4  10  486.84   14.54
   0  -4   9   46.46    3.17
   0  -4   9   51.55    2.39
   0  -4   9   50.63    2.36
   0  -4   8  161.53    6.23
   0  -4   7   39.82    2.58
   0  -4   6   36.70    2.30
   0  -4   5  555.56   14.19
   0  -4   4  382.51   10.15
   0  -4   3  843.47   19.81
   0  -4   2 1782.22   39.65
   0   4  -1  841.02   19.41
   0   4   0  327.40    8.36
   0   4   1  189.14    5.32
   0   4   2    5.25    0.64
   0   4   3   10.77    0.95
   0   4   4  589.85   14.25
   0   4   5    3.18    0.61
   0   4   6  160.46    5.22
   0   4   7  614.50   15.51
   0   4   8  188.65    6.39
   0   4   9 1010.45   24.82
   0   4  10  316.17    9.91
   0   4  10  308.43    8.73
   0   4  11   85.17    4.40
   0   4  11   82.91    3.59
   0   4  12    1.68    0.65
   0   4  12    6.37    0.95
   0   4  13  207.26    6.86
   0   4  14    4.45    0.86
   0   4  15  295.61    8.83
   0   4  16  107.44    4.23
   0  -4 -17  102.35    4.00
   0   4  17   96.29    3.71
   0  -4 -18   26.98    1.61
   0   4  18   25.48    1.50
   0  -5  17   15.46    1.10
   0  -5  16    0.82    0.33
   0  -5  15   16.63    1.32
   0  -5  15   15.48    1.24
   0  -5  14   36.60    2.08
   0  -5  14   37.78    2.17
   0  -5  13  220.37    6.76
   0  -5  13  216.08    6.65
   0  -5  12  200.33    6.28
   0  -5  12  190.00    6.07
   0  -5  11  833.75   20.06
   0  -5  11  843.71   20.22
   0  -5  10  281.36    7.99
   0  -5  10  289.12    8.14
   0  -5  10  291.52   10.33
   0  -5   9  225.13    6.43
   0  -5   9  214.14    6.46
   0  -5   9  210.49    8.20
   0  -5   8   13.50    1.15
   0  -5   8   12.96    1.71
   0  -5   7   39.35    2.77
   0  -5   6   30.20    2.28
   0  -5   5  476.53   12.92
   0  -5   4   88.60    3.74
   0  -5   3 1522.15   34.78
   0  -5   2  795.98   19.32
   0   5  -2  826.35   19.34
   0   5  -1   15.31    1.21
   0   5   0    5.76    0.74
   0   5   1  314.58    8.37
   0   5   2  115.39    3.91
   0   5   3  278.64    7.71
   0   5   4  555.71   13.79
   0   5   5  102.74    3.87
   0   5   6  527.84   13.61
   0   5   7    0.20    0.45
   0   5   8  587.16   15.53
   0   5   9  120.76    5.14
   0   5  10  133.94    4.43
   0   5  10  134.96    4.63
   0   5  10  139.80    5.72
   0   5  11   40.16    2.38
   0   5  11   42.38    2.25
   0   5  11   46.74    3.25
   0   5  12   11.29    1.29
   0   5  12   13.35    1.76
   0   5  13    0.85    0.53
   0   5  14   98.99    4.20
   0   5  15    4.89    0.87
   0  -5 -16  181.48    6.19
   0   5  16  167.71    5.65
   0   5  17    1.28    0.38
   0  -5 -17    1.10    0.52
   0   5  18    4.96    0.60
   0  -5 -18    5.12    0.69
   0  -6  16   42.06    2.04
   0  -6  15    7.07    0.82
   0  -6  14   16.72    1.36
   0  -6  14   14.68    1.18
   0  -6  13    1.25    0.45
   0  -6  13    0.96    0.48
   0  -6  12    2.02    0.58
   0  -6  12    1.65    0.50
   0  -6  11  101.29    3.81
   0  -6  11   97.59    3.92
   0  -6  10    9.61    1.07
   0  -6   9    7.26    1.49
   0  -6   9    9.57    1.06
   0  -6   8  108.17    5.49
   0  -6   8  114.11    4.07
   0  -6   7   42.55    3.13
   0  -6   7   46.35    2.23
   0  -6   6   71.23    3.90
   0  -6   5 1901.50   44.12
   0  -6   4 1845.97   42.53
   0   6  -3  347.14    9.89
   0   6  -2 1065.66   25.24
   0   6  -1  706.22   17.38
   0   6   0  146.34    4.95
   0   6   1   65.98    2.92
   0   6   2    3.41    0.66
   0   6   3  168.64    5.49
   0   6   4  105.58    4.06
   0   6   5   33.87    2.12
   0   6   6  214.37    6.91
   0   6   7   90.79    4.06
   0   6   8  135.86    5.43
   0   6   9    4.36    1.01
   0   6   9    3.82    0.65
   0   6  10  173.31    5.68
   0   6  10  171.43    5.80
   0   6  11    1.23    0.52
   0   6  11    0.54    0.46
   0   6  11    2.11    0.82
   0   6  12    4.97    0.90
   0   6  12    5.13    1.23
   0   6  12    4.27    0.75
   0   6  13  271.98    8.32
   0  -6 -14   84.04    4.24
   0   6  14   80.95    3.66
   0  -6 -15  335.99   10.07
   0   6  15  322.47    9.28
   0  -6 -16   52.51    2.88
   0   6  16   53.54    2.56
   0  -6 -17   53.29    2.56
   0   6  17   52.41    2.27
   0  -6 -18    4.41    0.59
   0  -7  16    0.27    0.28
   0  -7  15   19.08    1.25
   0  -7  14   49.62    2.34
   0  -7  13   24.20    1.67
   0  -7  12    1.20    0.53
   0  -7  11    7.70    1.03
   0  -7  10   57.43    2.83
   0  -7   9    8.77    1.04
   0  -7   8   38.74    2.20
   0  -7   7    6.04    0.84
   0  -7   7    7.77    1.48
   0  -7   6  334.80    8.94
   0  -7   6  322.22   10.77
   0   7  -5    2.22    0.68
   0   7  -4  716.25   18.71
   0   7  -3  373.57   10.94
   0   7  -2  593.59   15.56
   0   7  -1  122.20    4.76
   0   7   0   94.56    3.95
   0   7   1  270.29    8.07
   0   7   2   27.71    1.91
   0   7   3  166.14    5.74
   0   7   4  555.84   14.52
   0   7   5   40.94    2.50
   0   7   6   69.17    3.49
   0  -7  -7    0.36    0.44
   0   7   7   -0.13    0.45
   0   7   8   10.98    1.42
   0  -7  -8   10.53    1.28
   0   7   8    9.45    1.04
   0   7   9   49.08    3.22
   0   7   9   42.67    2.36
   0   7   9   44.16    3.08
   0  -7  -9   45.85    2.87
   0   7  10   88.46    3.69
   0  -7 -10   87.28    4.38
   0   7  11   22.21    1.67
   0  -7 -11   20.40    2.09
   0   7  11   23.96    2.43
   0  -7 -12   53.15    3.42
   0   7  12   58.14    2.78
   0   7  13  322.86    8.78
   0  -7 -13  312.83   10.21
   0  -7 -14  232.15    7.99
   0  -7 -15  150.23    5.69
   0  -7 -16   33.98    2.19
   0  -7 -17   36.88    1.96
   0  -8  15    0.90    0.37
   0  -8  14  284.24    7.58
   0  -8  13    8.26    0.93
   0  -8  12   72.94    3.13
   0  -8  11   39.72    2.28
   0  -8  10   53.13    2.75
   0  -8   9  308.72    8.91
   0  -8   8  177.84    5.88
   0  -8   7    0.89    0.44
   0   8  -6   31.86    2.86
   0  -8   6   38.13    2.14
   0  -8   5  343.60    9.24
   0   8  -5  333.32   11.06
   0   8  -4   49.29    3.36
   0  -8   4   57.19    2.63
   0   8  -3 1175.00   28.91
   0   8  -2   44.74    2.88
   0   8  -1    0.79    0.54
   0   8   0    8.45    1.18
   0   8   1  482.15   13.13
   0   8   2  342.47   10.05
   0   8   3  705.70   18.11
   0   8   4  141.42    5.47
   0   8   5  781.04   19.92
   0  -8  -6  143.41    5.12
   0   8   6  133.10    5.48
   0   8   6  135.11    4.63
   0  -8  -7  129.87    4.97
   0   8   7  121.42    5.29
   0   8   7  119.34    4.38
   0   8   8   56.76    3.50
   0  -8  -8   57.17    3.18
   0   8   8   53.19    2.69
   0   8   9  528.53   15.27
   0  -8  -9  551.01   14.70
   0   8   9  550.66   15.43
   0   8  10   74.02    4.37
   0  -8 -10   71.50    3.88
   0   8  10   68.77    3.23
   0  -8 -11   17.32    1.90
   0   8  11   17.38    1.49
   0   8  12   28.17    1.87
   0  -8 -12   29.50    2.50
   0   8  13   20.47    1.50
   0  -8 -13   19.76    1.99
   0  -8 -14   13.02    1.54
   0  -8 -15   24.89    1.94
   0  -8 -16   36.46    2.11
   0  -8 -17   -0.13    0.30
   0  -9  14   14.71    1.03
   0  -9  14   14.56    0.98
   0  -9  13   86.91    3.14
   0  -9  12    2.04    0.55
   0  -9  11    6.80    0.89
   0  -9  10   49.00    2.59
   0  -9   9   14.28    1.38
   0  -9   8    2.50    0.66
   0  -9   7    2.19    0.59
   0  -9   6  245.26    7.40
   0  -9   5   33.14    2.04
   0   9  -4  160.79    7.01
   0  -9   4  179.96    5.65
   0  -9   3    0.77    0.70
   0   9  -3    0.05    0.53
   0   9  -2   67.24    3.84
   0  -9   2   67.28    2.95
   0   9  -1  187.04    7.08
   0  -9   1  198.11    6.05
   0  -9   0   18.16    1.40
   0   9   0   16.22    1.73
   0   9   1   93.39    4.44
   0  -9  -1   99.83    3.77
   0  -9  -2  353.19    9.61
   0   9   2  348.47   10.65
   0  -9  -3   20.87    1.59
   0   9   3   21.37    1.99
   0  -9  -4  753.94   18.42
   0   9   4  737.91   19.39
   0   9   5    4.62    0.76
   0  -9  -5    3.81    0.78
   0  -9  -6  787.91   19.23
   0   9   6  751.13   18.56
   0   9   6  758.72   20.08
   0   9   7    0.57    0.56
   0   9   7    0.38    0.40
   0  -9  -7    0.81    0.56
   0   9   8   85.64    3.70
   0   9   8   88.17    4.66
   0  -9  -8   90.55    4.24
   0  -9  -9   56.52    3.36
   0   9   9   58.57    3.79
   0   9   9   53.46    2.83
   0   9   9   54.88    3.69
   0   9  10   72.25    3.34
   0  -9 -10   72.02    3.92
   0  -9 -11    1.80    0.80
   0   9  11    2.16    0.62
   0  -9 -12   44.08    2.97
   0   9  12   43.94    2.37
   0  -9 -13    0.58    0.59
   0  -9 -14   15.88    1.66
   0  -9 -15    0.05    0.39
   0  -9 -16   37.27    1.96
   0 -10  13   54.78    2.12
   0 -10  12    0.56    0.33
   0 -10  12    0.25    0.27
   0 -10  11    1.21    0.47
   0 -10  10  174.08    5.60
   0 -10   9    9.24    1.10
   0 -10   8  111.07    4.33
   0 -10   7  152.23    5.37
   0 -10   6   92.53    3.87
   0 -10   5   69.07    3.20
   0 -10   4   95.80    3.87
   0 -10   3  304.33    8.69
   0  10  -2    1.42    0.75
   0 -10   2    1.09    0.54
   0  10  -1  323.72   10.64
   0 -10   1  330.98    9.22
   0 -10   0  124.51    4.52
   0  10   0  119.50    5.46
   0 -10  -1   97.93    3.89
   0  10   1   93.02    4.70
   0  10   2  135.24    5.86
   0 -10  -2  140.59    4.99
   0  10   3  196.69    7.43
   0 -10  -3  204.49    6.52
   0  10   4  106.24    5.02
   0 -10  -4  108.22    4.33
   0  10   5  447.52   13.39
   0 -10  -5  459.36   12.44
   0  10   6   81.58    4.45
   0 -10  -6   86.61    3.95
   0 -10  -7   68.00    3.53
   0  10   7   65.27    3.98
   0 -10  -8   18.11    1.82
   0 -10  -9    0.67    0.62
   0 -10 -10    7.52    1.26
   0 -10 -11  254.33    8.51
   0 -10 -12   54.23    3.21
   0 -10 -13  235.16    7.68
   0 -10 -14   12.86    1.32
   0 -10 -15    4.90    0.75
   0 -10 -16   28.20    1.47
   0 -11  12    0.57    0.25
   0 -11  11    1.53    0.39
   0 -11  10   47.06    2.24
   0 -11   9   50.33    2.48
   0 -11   8   62.61    2.95
   0 -11   7   97.22    3.95
   0 -11   6  150.34    5.30
   0 -11   5   14.36    1.40
   0 -11   4   57.58    2.91
   0 -11   3  290.35    8.50
   0 -11   2  452.26   12.07
   0 -11   1  138.73    5.02
   0 -11   0  387.46   10.66
   0 -11  -1    5.52    0.91
   0 -11  -2  403.39   11.00
   0  11   2  385.08   12.33
   0 -11  -3  104.27    4.29
   0  11   3  105.27    5.18
   0 -11  -4   43.26    2.59
   0  11   4   45.44    3.25
   0  11   5   64.62    3.99
   0 -11  -5   66.29    3.34
   0 -11  -6    1.12    0.60
   0 -11  -7   24.93    2.05
   0 -11  -8   27.09    2.18
   0 -11  -9   34.15    2.48
   0 -11 -10   97.72    4.48
   0 -11 -11  147.20    5.68
   0 -11 -12  178.23    6.26
   0 -11 -13   29.89    2.02
   0 -11 -14   16.41    1.32
   0 -11 -15    6.83    0.73
   0 -12  11   -0.04    0.22
   0 -12  10    5.15    0.63
   0 -12   9   59.26    2.51
   0 -12   8    0.85    0.45
   0 -12   7  181.25    5.78
   0 -12   6    0.32    0.48
   0 -12   5  342.14    9.47
   0 -12   5  329.67    8.93
   0 -12   4   26.38    1.88
   0  12  -3    7.37    0.88
   0 -12   3    5.90    0.96
   0 -12   2  151.27    5.31
   0 -12   1   70.17    3.28
   0 -12   0    3.47    0.79
   0 -12  -1  202.60    6.59
   0 -12  -2   14.12    1.40
   0 -12  -3    0.04    0.51
   0 -12  -4    0.21    0.53
   0 -12  -5  133.25    5.17
   0 -12  -6   15.95    1.62
   0 -12  -7   44.10    2.74
   0 -12  -8   69.45    3.57
   0 -12  -9    6.60    1.05
   0 -12 -10  266.64    8.35
   0 -12 -11   62.02    3.14
   0 -12 -12  173.13    5.73
   0 -12 -13   28.34    1.75
   0 -12 -14   26.54    1.47
   0 -13   9   25.29    1.30
   0 -13   8  170.19    4.83
   0 -13   8  194.75    5.28
   0 -13   7    0.91    0.42
   0 -13   6  248.71    7.13
   0 -13   5    7.68    0.96
   0 -13   5    7.30    0.78
   0 -13   4   27.37    1.65
   0 -13   4   30.68    1.92
   0  13  -3   47.72    2.22
   0 -13   3   48.11    2.52
   0  13  -2   91.73    3.41
   0 -13   2   89.83    3.71
   0 -13   1    3.53    0.76
   0 -13   0  161.98    5.57
   0 -13  -1    0.97    0.57
   0 -13  -2   21.43    1.71
   0 -13  -3    0.09    0.49
   0 -13  -4   18.60    1.64
   0 -13  -5   -0.13    0.48
   0 -13  -6   18.80    1.68
   0 -13  -7    1.58    0.58
   0 -13  -8   -0.47    0.53
   0 -13  -9   52.19    2.78
   0 -13 -10   23.76    1.75
   0 -13 -11  101.32    3.84
   0 -13 -12   29.06    1.67
   0 -13 -13   18.38    1.14
   0 -14   7   67.40    2.30
   0 -14   7   78.37    2.59
   0 -14   6   14.78    1.08
   0 -14   5   21.81    1.41
   0 -14   4   53.34    2.38
   0 -14   4   46.27    2.04
   0 -14   3    3.46    0.60
   0 -14   3    3.54    0.66
   0  14  -2    2.30    0.48
   0 -14   2    1.92    0.57
   0 -14   1  138.41    4.72
   0  14  -1  137.59    4.38
   0 -14   0   73.80    3.17
   0 -14  -1  147.79    5.04
   0 -14  -2   50.27    2.61
   0 -14  -3  108.75    4.13
   0 -14  -4    1.47    0.56
   0 -14  -5    0.06    0.48
   0 -14  -6   15.36    1.38
   0 -14  -7   19.02    1.52
   0 -14  -8    6.25    0.88
   0 -14  -9    6.92    0.88
   0 -14 -10    6.70    0.79
   0 -14 -11    0.27    0.26
   0 -15   5    0.06    0.24
   0 -15   4    5.87    0.65
   0 -15   3   11.55    0.84
   0 -15   3   12.07    0.96
   0 -15   2   14.77    1.12
   0 -15   2   14.86    1.06
   0 -15   1   32.57    1.75
   0  15  -1   30.36    1.47
   0 -15   0  191.54    5.66
   0  15   0  188.95    5.31
   0 -15  -1  238.21    6.79
   0 -15  -2   38.75    2.04
   0 -15  -3    6.67    0.84
   0 -15  -4    9.67    0.99
   0 -15  -5   46.07    2.25
   0 -15  -6    3.78    0.65
   0 -15  -7    6.31    0.78
   0 -15  -8    8.84    0.87
   0 -15  -9   44.83    1.95
   0 -16   1   26.01    1.31
   0 -16   1   24.66    1.21
   0 -16   0  122.80    3.70
   0 -16   0  126.65    3.78
   0 -16  -1   74.66    2.66
   0  16   2   65.31    2.28
   0 -16  -2   74.14    2.59
   0 -16  -3   -0.69    0.39
   0  16   3   -0.43    0.30
   0 -16  -4    7.04    0.71
   0 -16  -5    0.08    0.26
   0 -16  -6   11.73    0.86
   1 -16  -3    7.89    0.69
   1 -16  -2    3.97    0.50
   1 -16  -1    3.96    0.51
   1 -15  -8    5.58    0.62
   1 -15  -7   59.48    2.40
   1 -15  -6    2.02    0.48
   1 -15  -5   11.52    1.03
   1 -15  -4    2.57    0.55
   1 -15  -3    0.35    0.32
  -1  15   2   12.88    0.98
   1 -15  -2   13.37    1.10
  -1  15   1   66.76    2.52
   1 -15  -1   73.06    2.80
   1 -15   0    1.15    0.45
  -1  15   0    0.41    0.29
  -1  15  -1  234.70    6.27
   1 -15   1  257.43    6.71
   1 -15   2   31.18    1.43
   1 -15   2   34.81    1.70
   1 -15   3   40.90    1.82
   1 -15   4    0.98    0.30
   1 -14 -10   38.22    1.83
   1 -14  -9   29.08    1.68
   1 -14  -8   35.94    1.98
   1 -14  -7    1.74    0.50
   1 -14  -6    1.69    0.52
   1 -14  -5    1.72    0.56
   1 -14  -4  114.55    4.22
   1 -14  -3   61.31    2.87
   1 -14  -2    0.72    0.42
   1 -14  -1   28.91    1.84
  -1  14   0  201.05    5.99
   1 -14   0  221.26    6.42
   1 -14   1   28.29    1.77
  -1  14  -1   26.17    1.53
  -1  14  -2   53.34    2.26
   1 -14   2   58.57    2.58
   1 -14   3   56.61    2.47
   1 -14   3   50.55    2.10
  -1  14  -3   51.50    2.10
   1 -14   4    5.71    0.75
   1 -14   5    3.30    0.53
   1 -14   6    0.17    0.28
   1 -14   7   15.43    0.95
   1 -13 -12   15.13    1.07
   1 -13 -11   84.17    3.21
   1 -13 -10   13.53    1.23
   1 -13  -9   59.78    2.88
   1 -13  -8   15.59    1.45
   1 -13  -7    1.55    0.53
   1 -13  -6    0.56    0.46
   1 -13  -5    3.63    0.79
   1 -13  -4    0.52    0.47
   1 -13  -3    0.01    0.48
   1 -13  -2   51.34    2.73
   1 -13  -1  164.01    5.62
   1 -13   0   48.37    2.63
  -1  13  -1  131.14    4.49
   1 -13   1  139.91    4.87
  -1  13  -2    8.13    0.92
   1 -13   2    9.62    1.10
  -1  13  -3  156.65    4.95
   1 -13   3  166.13    5.39
   1 -13   4   83.40    3.41
  -1  13  -4   83.48    3.06
   1 -13   5   11.38    1.13
   1 -13   6   23.43    1.53
   1 -13   7   64.62    2.61
   1 -13   8   85.92    2.96
   1 -13   9   62.32    2.20
   1 -12 -13    1.43    0.39
   1 -12 -12  103.67    3.85
   1 -12 -11    0.15    0.42
   1 -12 -10  165.21    5.79
   1 -12  -9    0.47    0.50
   1 -12  -8  123.54    4.94
   1 -12  -7   13.91    1.47
   1 -12  -6  101.30    4.37
   1 -12  -5  105.96    4.44
   1 -12  -4   24.64    1.94
   1 -12  -3   32.17    2.20
   1 -12  -2   18.29    1.63
   1 -12  -1   12.59    1.34
   1 -12   0    1.70    0.64
   1 -12   1   11.22    1.26
   1 -12   2   44.51    2.55
  -1  12  -2   49.55    2.43
  -1  12  -3    0.62    0.43
   1 -12   3    1.10    0.68
  -1  12  -4  131.96    4.45
   1 -12   4  132.38    4.81
   1 -12   5   56.59    2.80
  -1  12  -5   53.89    2.42
   1 -12   6    5.97    0.87
   1 -12   7  198.35    6.11
   1 -12   8   32.76    1.87
   1 -12   9  156.55    4.75
   1 -12  10    0.64    0.34
   1 -11 -14    2.64    0.52
   1 -11 -13   11.98    1.17
   1 -11 -12   24.36    1.86
   1 -11 -11  225.42    7.41
   1 -11 -10   35.83    2.48
   1 -11  -9  162.62    6.12
   1 -11  -8   27.34    2.19
   1 -11  -7   22.90    1.96
   1 -11  -6   10.15    1.33
   1 -11  -5  216.14    7.20
   1 -11  -4  149.13    5.51
   1 -11  -3    5.57    0.98
   1 -11  -2    1.83    0.60
   1 -11  -1  389.82   10.91
  -1  11   1  401.45   12.92
   1 -11   0   21.73    1.77
  -1  11   0   24.11    2.66
   1 -11   1   21.31    1.73
   1 -11   2  106.16    4.23
   1 -11   3   53.57    2.79
  -1  11  -3   52.94    2.58
   1 -11   4   19.72    1.66
  -1  11  -4   20.74    1.51
  -1  11  -5   16.47    1.32
   1 -11   5   14.24    1.40
   1 -11   6   93.19    3.90
   1 -11   7    1.94    0.60
   1 -11   8   78.45    3.35
   1 -11   9    0.20    0.42
   1 -11  10   54.62    2.42
   1 -11  11   18.29    1.19
   1 -11  12    0.74    0.27
   1 -10 -15   36.44    1.85
   1 -10 -14   12.68    1.20
   1 -10 -13    0.11    0.43
   1 -10 -12  118.40    4.90
   1 -10 -11   63.66    3.50
   1 -10 -10  152.14    6.02
   1 -10  -9    0.07    0.57
   1 -10  -8   51.59    3.12
   1 -10  -7   98.30    4.43
   1 -10  -6   34.06    2.35
  -1  10   6   26.85    2.47
  -1  10   5   32.59    2.61
   1 -10  -5   32.46    2.23
   1 -10  -4   37.23    2.37
   1 -10  -3  269.35    8.15
  -1  10   2  830.35   21.48
   1 -10  -2  788.53   19.72
   1 -10  -1  557.46   14.45
  -1  10   1  572.34   16.49
  -1  10   0  704.99   20.06
   1 -10   0  721.55   17.78
   1 -10   1   60.38    2.96
   1 -10   2  185.62    6.11
   1 -10   3   96.42    3.94
   1 -10   4   87.82    3.76
  -1  10  -4   91.76    3.53
  -1  10  -4   84.18    5.26
  -1  10  -5  106.60    3.89
   1 -10   5   98.32    4.11
   1 -10   6   82.89    3.65
   1 -10   7    7.03    1.01
   1 -10   8   -0.33    0.57
   1 -10   9    4.85    0.86
   1 -10  10   89.82    3.56
   1 -10  11   -0.14    0.39
   1 -10  12   18.71    1.24
   1 -10  13    5.18    0.57
   1  -9 -16   37.85    1.80
   1  -9 -15    9.87    1.03
   1  -9 -14    8.19    1.07
   1  -9 -13   43.22    2.75
   1  -9 -12    5.87    1.14
   1  -9 -11   63.37    3.63
   1  -9 -10   44.63    2.99
   1  -9  -9    1.41    0.72
  -1   9   8   29.29    2.61
   1  -9  -8   33.01    2.43
  -1   9   8   28.99    2.58
  -1   9   7   17.41    1.97
   1  -9  -7   15.81    1.61
   1  -9  -6  121.66    4.80
  -1   9   6  113.38    5.13
   1  -9  -5   40.42    2.43
  -1   9   5   40.21    2.76
   1  -9  -4  500.95   13.13
  -1   9   4  495.12   13.84
  -1   9   3  206.22    7.18
  -1   9   3  221.07    7.43
   1  -9  -3  207.44    6.60
   1  -9  -2 1172.01   27.23
  -1   9   2 1165.27   28.65
  -1   9   2 1150.38   28.09
   1  -9  -1  188.40    5.99
  -1   9   1  186.80    6.66
   1  -9   0   85.12    3.49
   1  -9   1   39.87    2.21
   1  -9   2    0.14    0.36
   1  -9   3    8.88    1.05
  -1   9  -4    2.27    0.49
   1  -9   4    0.40    0.41
  -1   9  -5    6.48    0.86
   1  -9   5    6.64    0.97
  -1   9  -6   77.05    3.10
   1  -9   6   70.32    3.26
   1  -9   7   22.50    1.75
   1  -9   8   90.98    3.89
   1  -9   9   22.09    1.75
   1  -9  10    2.19    0.63
   1  -9  11   -0.15    0.44
   1  -9  12    0.62    0.36
   1  -9  13   12.52    1.03
   1  -9  14   38.78    1.68
   1  -8 -16    5.75    0.78
   1  -8 -15    0.97    0.47
   1  -8 -14  196.93    6.82
   1  -8 -13   51.34    3.17
   1  -8 -12  323.70   10.30
   1  -8 -11   38.66    2.82
  -1   8  10  139.10    4.97
   1  -8 -10  142.84    5.87
  -1   8   9  530.29   13.59
   1  -8  -9  577.11   14.91
  -1   8   9  555.43   15.57
  -1   8   8   39.64    2.27
  -1   8   8   46.30    3.15
  -1   8   8   43.61    3.07
   1  -8  -8   46.21    2.83
  -1   8   7   52.31    2.72
  -1   8   7   57.30    3.38
   1  -8  -6   81.01    3.59
  -1   8   6   77.55    3.86
  -1   8   5  246.17    7.97
  -1   8   5  231.53    7.11
   1  -8  -5  255.20    7.52
   1  -8  -4   25.58    1.76
  -1   8   4   26.19    2.02
  -1   8   4   24.47    1.67
  -1   8   3 1540.97   36.98
  -1   8   3 1667.73   37.30
  -1   8   2    9.85    1.53
  -1   8   1  153.37    5.53
  -1   8   0    0.65    0.43
  -1   8  -1   12.85    1.36
   1  -8   2   18.52    1.39
   1  -8   3  641.12   15.72
   1  -8   4    2.77    0.62
   1  -8   5 1478.01   34.63
  -1   8  -5 1551.25   34.34
   1  -8   6   16.01    1.42
  -1   8  -6   17.77    1.32
   1  -8   7  332.73    9.37
  -1   8  -7  325.84   11.46
  -1   8  -8   30.94    2.92
   1  -8   8   40.94    2.39
   1  -8   9   -0.10    0.55
   1  -8  10  231.15    7.19
   1  -8  11   55.97    2.79
   1  -8  12   21.72    1.59
   1  -8  13    0.98    0.45
   1  -8  14   31.41    1.66
   1  -8  15   13.93    0.91
   1  -8  15   11.72    0.88
   1  -7 -17    4.01    0.60
   1  -7 -16   -0.28    0.39
   1  -7 -15   99.80    4.24
  -1   7  15   99.73    3.80
   1  -7 -14   64.73    3.53
  -1   7  14   61.29    3.00
   1  -7 -13  393.67   11.71
  -1   7  13  378.80   10.75
  -1   7  12    7.63    1.06
   1  -7 -12    8.84    1.39
  -1   7  11    8.23    0.96
   1  -7 -11    5.99    1.13
  -1   7  11    7.36    1.05
  -1   7  10   91.15    3.61
   1  -7 -10   89.48    4.39
  -1   7  10   83.08    3.55
  -1   7  10   92.88    4.88
   1  -7  -9   55.28    3.19
  -1   7   9   51.93    2.56
  -1   7   9   55.66    3.52
  -1   7   8  295.21    8.40
  -1   7   8  268.49    8.35
  -1   7   8  318.49    9.91
   1  -7  -8  351.19    9.62
  -1   7   8  317.21    9.83
   1  -7  -7  114.22    4.44
  -1   7   7  103.60    3.80
  -1   7   7  105.07    4.60
  -1   7   6  394.28   11.23
  -1   7   5    2.39    0.67
  -1   7   4  570.76   15.14
  -1   7   4  616.44   14.79
  -1   7   3  454.59   12.04
  -1   7   2  190.64    6.14
  -1   7   1  149.52    5.12
  -1   7   0  129.52    4.64
  -1   7  -1    0.47    0.27
  -1   7  -2  292.98    8.58
  -1   7  -3  278.56    8.50
   1  -7   5   35.19    1.97
   1  -7   6 1118.50   26.01
   1  -7   7   17.43    1.44
   1  -7   8  184.36    5.96
  -1   7  -8  174.65    7.42
   1  -7   9   38.97    2.31
  -1   7  -9   38.32    3.12
   1  -7  10  106.88    4.23
   1  -7  11   27.42    1.93
   1  -7  12    8.94    1.11
   1  -7  13   25.84    1.74
   1  -7  14   66.95    2.82
   1  -7  15   63.47    2.49
   1  -6 -17    2.86    0.57
  -1   6  17    3.62    0.56
   1  -6 -16    9.47    1.11
  -1   6  16    7.86    0.90
  -1   6  15   49.70    2.66
   1  -6 -15   52.43    2.99
   1  -6 -14  436.09   12.33
  -1   6  14  399.12   11.43
   1  -6 -13  143.68    5.94
  -1   6  13  137.96    5.31
   1  -6 -12  239.36    8.34
  -1   6  12  231.31    7.56
   1  -6 -11   47.67    3.15
  -1   6  11   50.92    2.84
  -1   6  11   56.03    3.71
   1  -6 -10   82.43    4.11
  -1   6  10   77.79    3.24
  -1   6  10   82.25    4.47
  -1   6  10   79.55    3.58
  -1   6   9    6.78    1.16
  -1   6   9    6.10    0.86
   1  -6  -9    6.52    1.08
  -1   6   9    5.93    0.81
  -1   6   9    7.07    0.95
  -1   6   8   19.21    1.85
   1  -6  -8   19.99    1.73
  -1   6   7   22.96    1.90
  -1   6   6   74.00    3.46
  -1   6   5  639.39   16.08
  -1   6   4   33.48    1.72
  -1   6   4   29.28    1.87
  -1   6   3  247.47    7.16
  -1   6   2  216.39    6.42
  -1   6   1   72.31    2.99
  -1   6   1   76.11    2.60
  -1   6   0    0.26    0.31
  -1   6  -1    5.74    0.76
  -1   6  -2  121.79    4.34
  -1   6  -3  617.48   15.54
  -1   6  -4  231.86    7.27
  -1   6  -5 1472.41   34.48
   1  -6   6  124.71    4.21
   1  -6   7  295.81    8.21
   1  -6   8  376.39   10.12
  -1   6  -8  373.85   11.84
   1  -6   9    4.09    0.77
  -1   6  -9    3.17    1.04
   1  -6  10  158.60    5.18
   1  -6  10  152.53    5.33
   1  -6  11   21.68    1.58
   1  -6  11   21.66    1.70
   1  -6  12  139.72    4.76
   1  -6  12  143.66    5.05
   1  -6  13   64.63    2.81
   1  -6  13   68.14    3.07
   1  -6  14  136.09    4.64
   1  -6  14  132.16    4.34
   1  -6  15  139.88    4.42
   1  -6  15  127.27    4.03
  -1   5  18    2.01    0.39
   1  -5 -18    1.52    0.37
   1  -5 -17    0.60    0.33
  -1   5  17   -0.17    0.39
   1  -5 -16   52.94    2.83
  -1   5  16   50.26    2.61
   1  -5 -15   83.19    3.99
  -1   5  15   80.80    3.68
   1  -5 -14  229.80    7.83
  -1   5  14  211.03    7.17
  -1   5  13  161.54    5.94
  -1   5  12  303.43   10.19
  -1   5  12  280.85    8.78
  -1   5  11    2.18    0.75
  -1   5  11    2.09    0.94
  -1   5  10   54.49    2.84
  -1   5  10   59.49    3.61
  -1   5   9   11.58    1.48
  -1   5   8    3.51    0.82
  -1   5   7  286.91    8.63
  -1   5   6  468.88   12.34
  -1   5   5 1007.95   23.70
  -1   5   4  560.32   13.26
  -1   5   4  568.21   13.92
  -1   5   3   37.88    1.91
  -1   5   2  176.88    4.38
  -1   5   2  179.14    5.25
  -1   5   1    0.95    0.31
  -1   5   0  143.90    4.41
  -1   5  -1   71.37    2.77
  -1   5  -2 1840.64   41.09
  -1   5  -3  456.14   11.65
   1  -5   4 1033.84   24.41
   1  -5   5  292.19    8.66
   1  -5   6  377.64   10.88
   1  -5   7  200.15    7.15
   1  -5   8   54.48    2.62
   1  -5   8   61.59    2.69
  -1   5  -8   59.74    3.49
   1  -5   9   82.78    3.42
  -1   5  -9   86.19    4.33
   1  -5   9   87.60    3.48
   1  -5  10   54.94    2.67
   1  -5  10   56.16    2.73
   1  -5  11  225.64    6.92
   1  -5  11  221.54    6.78
   1  -5  12  713.10   17.69
   1  -5  12  735.68   17.95
   1  -5  13   12.82    1.29
   1  -5  13   13.72    1.28
   1  -5  14    1.54    0.54
   1  -5  14    1.27    0.51
   1  -5  15    2.41    0.53
   1  -5  15    2.08    0.55
   1  -5  16    8.74    0.82
   1  -5  17    8.06    0.76
   1  -4 -18    4.36    0.61
  -1   4  18    3.93    0.57
  -1   4  17   11.12    1.11
   1  -4 -17   13.05    1.21
   1  -4 -16    9.74    1.21
  -1   4  16    8.32    1.09
  -1   4  15  257.50    8.07
  -1   4  14   82.33    3.89
  -1   4  13  141.70    5.45
  -1   4  12  211.97    7.11
  -1   4  12  222.02    8.22
  -1   4  11  123.61    4.82
  -1   4  11  128.58    5.66
  -1   4  10   27.40    1.90
  -1   4  10   31.60    2.48
  -1   4   9  109.33    4.80
  -1   4   8   25.20    1.98
  -1   4   7  931.51   22.50
  -1   4   6  568.88   14.32
  -1   4   5 2805.55   61.83
  -1   4   4   87.49    3.20
  -1   4   4   87.71    2.64
  -1   4   3    2.61    0.42
  -1   4   3    2.01    0.43
  -1   4   2   28.13    1.44
  -1   4   1  153.55    4.08
  -1   4   1  156.97    4.42
  -1   4   0  261.34    6.70
  -1   4  -1  136.71    4.04
  -1   4  -2  805.36   18.56
   1  -4   3 1227.65   27.85
   1  -4   4  634.14   15.42
   1  -4   5   12.73    1.18
   1  -4   6   72.25    3.33
   1  -4   7    1.61    0.51
  -1   4  -8  278.61    8.68
   1  -4   8  264.51    8.72
   1  -4   9   26.65    1.77
  -1   4  -9   30.14    2.25
   1  -4   9   28.04    1.74
   1  -4  10   52.05    2.59
   1  -4  10   51.42    2.53
   1  -4  11  120.66    4.44
   1  -4  11  121.76    4.44
   1  -4  12  696.48   17.17
   1  -4  12  689.61   17.21
   1  -4  13  552.02   14.09
   1  -4  13  546.17   14.13
   1  -4  14  250.70    7.46
   1  -4  14  254.54    7.58
   1  -4  15   15.24    1.32
   1  -4  15   14.82    1.29
   1  -4  16   12.98    1.10
   1  -4  17   15.30    1.04
  -1   3  18    6.92    0.80
   1  -3 -18    7.36    0.79
   1  -3 -17   33.03    2.00
  -1   3  17   31.61    1.96
  -1   3  16   84.23    3.70
  -1   3  15    0.96    0.64
  -1   3  14  224.12    7.44
  -1   3  13    9.31    1.26
  -1   3  12   17.78    1.63
  -1   3  12   19.36    2.07
  -1   3  11   -0.72    0.60
  -1   3  11    0.56    0.45
  -1   3  10   73.30    3.25
  -1   3  10   73.21    3.84
  -1   3   9   26.22    2.10
  -1   3   8 1502.22   34.97
  -1   3   7  649.39   16.29
  -1   3   6 2946.30   65.05
  -1   3   5    0.64    0.11
  -1   3   5    1.03    0.44
  -1   3   4 1119.14   25.15
  -1   3   4 1105.53   24.26
  -1   3   3  483.04   11.49
  -1   3   3  480.83   11.08
  -1   3   2 1285.29   27.75
  -1   3   2 1218.46   27.66
  -1   3   1 1277.43   28.02
  -1   3   1 1291.20   28.29
  -1   3   0  780.25   17.51
  -1   3  -1   22.07    1.07
   1  -3   2    4.86    0.52
   1  -3   3  104.96    3.31
   1  -3   4   27.92    1.51
   1  -3   5  169.04    5.20
   1  -3   6  240.69    7.08
   1  -3   7  123.76    4.66
  -1   3  -8   67.21    3.24
   1  -3   8   66.47    3.33
   1  -3   9  196.81    6.88
   1  -3   9  190.34    5.75
   1  -3   9  187.62    5.87
   1  -3  10    0.73    0.57
   1  -3  10    0.15    0.36
   1  -3  11  841.46   20.37
   1  -3  11  858.27   20.47
   1  -3  12  269.59    7.83
   1  -3  12  254.96    7.74
   1  -3  13  459.47   12.06
   1  -3  13  443.66   11.99
   1  -3  14    2.82    0.65
   1  -3  14    5.05    0.88
   1  -3  15   97.91    3.83
   1  -3  15   95.66    3.81
   1  -3  16   33.94    1.95
   1  -3  17   22.85    1.42
   1  -2 -18   19.56    1.32
  -1   2  18   19.91    1.38
  -1   2  17   88.95    3.62
  -1   2  16   60.65    3.07
  -1   2  15   88.70    3.99
  -1   2  14  106.37    4.51
  -1   2  13    6.22    1.36
  -1   2  13    6.24    1.04
  -1   2  12   15.91    1.83
  -1   2  12   14.17    1.47
  -1   2  11    1.10    0.66
  -1   2  11    1.87    0.60
  -1   2  10   14.52    1.32
  -1   2  10   14.85    1.62
  -1   2   9   50.92    2.91
  -1   2   8   11.81    1.29
  -1   2   7  186.21    5.99
  -1   2   6  677.37   16.46
  -1   2   5 4962.87  107.60
  -1   2   4 4521.64   98.01
  -1   2   4 4531.18   96.99
  -1   2   3  273.72    6.86
  -1   2   3  274.01    6.36
  -1   2   2 3776.16   81.51
  -1   2   2 3805.51   81.66
  -1   2   1   26.24    0.95
  -1   2   1   25.50    1.02
  -1   2   1   25.55    1.14
  -1   2   0  556.38   12.38
  -1   2  -1 9999.00  213.81
   1  -2   2  110.03    2.99
   1  -2   3  974.16   21.70
   1  -2   4  196.15    5.26
   1  -2   5   58.00    2.33
   1  -2   6  108.57    3.81
   1  -2   7   84.74    3.50
  -1   2  -7   98.75    3.65
   1  -2   8  269.67    8.25
  -1   2  -8  291.83    8.03
   1  -2   9   23.32    1.91
   1  -2  10  173.57    6.39
   1  -2  10  167.24    5.38
   1  -2  10  178.20    5.58
   1  -2  11   61.02    2.85
   1  -2  11   59.01    2.76
  -1   2 -12  683.74   20.14
   1  -2  12  736.59   17.83
   1  -2  12  722.04   17.73
   1  -2  13   40.37    2.37
   1  -2  13   40.62    2.38
   1  -2  14   33.20    2.14
   1  -2  14   39.76    2.33
   1  -2  15   94.28    3.86
   1  -2  16   40.01    2.21
   1  -2  17   44.36    2.17
   1  -2  18   71.93    2.58
   1  -2  18   62.59    2.34
  -1   1  18   63.04    2.66
  -1   1  17    7.52    0.99
  -1   1  16  142.20    5.20
  -1   1  15   51.33    2.89
  -1   1  14   14.94    1.53
  -1   1  13  105.97    5.29
  -1   1  13  101.64    4.29
  -1   1  12   35.53    2.79
  -1   1  12   40.43    2.44
  -1   1  11   90.03    3.73
  -1   1  11   87.26    4.40
  -1   1  10   35.48    2.49
  -1   1  10   32.17    1.95
  -1   1   9   69.50    3.43
  -1   1   8   14.61    1.39
  -1   1   7  499.57   12.86
  -1   1   6 1581.41   35.76
  -1   1   5  721.50   17.07
  -1   1   4 5320.98  114.90
  -1   1   3 2275.09   48.63
  -1   1   3 2220.13   49.29
  -1   1   2 1376.68   30.23
  -1   1   2 1385.22   29.96
  -1   1   1  217.58    5.31
  -1   1   1  231.16    5.26
  -1   1   0 1098.46   24.39
  -1   1   0 1122.15   24.00
  -1   1   0 1112.04   24.49
   1  -1   1 4340.20   92.44
  -1   1  -1 4259.96   93.05
   1  -1   2    3.35    0.27
   1  -1   3  916.22   20.23
   1  -1   4  683.92   15.56
   1  -1   5  549.43   13.40
  -1   1  -5  594.39   13.65
  -1   1  -6   15.73    1.11
   1  -1   6   15.31    1.11
   1  -1   7    2.62    0.49
  -1   1  -7    2.70    0.50
  -1   1  -8  155.67    4.78
   1  -1   8  162.74    5.32
   1  -1   9    7.05    0.95
   1  -1  10   91.21    3.51
   1  -1  10   85.56    3.36
   1  -1  10   89.03    4.05
   1  -1  11  171.94    5.51
   1  -1  11  161.06    5.38
   1  -1  11  169.28    6.39
  -1   1 -12    8.93    1.58
   1  -1  12   10.48    1.16
   1  -1  12    8.99    1.06
   1  -1  13    5.29    0.89
   1  -1  13    2.31    0.56
   1  -1  14   66.98    3.19
   1  -1  14   71.58    3.30
   1  -1  15    7.12    0.99
   1  -1  16  256.69    7.60
   1  -1  17    0.27    0.40
   1  -1  18   51.51    2.24
  -1   0  18   18.99    1.33
  -1   0  17  431.33   11.36
  -1   0  16    3.15    0.80
  -1   0  16    2.06    0.53
  -1   0  15  278.76    8.50
  -1   0  14   -0.28    0.65
  -1   0  13   16.52    1.98
  -1   0  13   17.71    1.61
  -1   0  12  225.58    7.17
  -1   0  12  234.05    8.46
  -1   0  11  138.95    4.80
  -1   0  11  143.03    5.94
  -1   0  11  145.32    4.99
  -1   0  10    1.43    0.50
  -1   0  10    8.41    1.19
  -1   0   9  855.34   21.24
  -1   0   8   71.42    3.31
  -1   0   7    3.41    0.66
  -1   0   6  754.20   18.01
  -1   0   5   23.91    1.43
  -1   0   4 4604.98   99.61
  -1   0   3 1711.56   37.57
  -1   0   2   50.92    1.72
  -1   0   2   53.19    1.53
  -1   0   1    4.32    0.33
  -1   0   1    5.52    0.37
  -1   0   0 4471.55   95.49
  -1   0   0 4461.32   95.83
  -1   0  -1 2714.88   55.39
  -1   0  -1 2691.12   55.28
  -1   0  -2 2397.11   50.62
   1   0   2 2300.05   50.33
   1   0   2 2351.02   50.38
   1   0   3   61.03    1.91
  -1   0  -3   62.65    2.00
   1   0   4 2837.66   59.17
  -1   0  -4 2626.37   59.05
  -1   0  -5   85.80    2.76
   1   0   5   93.60    2.98
  -1   0  -6  875.59   20.10
   1   0   6  916.22   20.60
   1   0   7    1.39    0.38
  -1   0  -7    1.32    0.29
   1   0   8  144.45    4.89
   1   0   9   16.03    1.43
   1   0  10  576.04   14.55
   1   0  10  593.73   15.46
   1   0  10  604.67   14.63
   1   0  11   17.61    1.44
   1   0  11   19.46    1.50
   1   0  11   18.56    1.79
  -1   0 -11   19.28    2.04
   1   0  12    4.49    0.80
   1   0  12    5.29    0.85
   1   0  12    6.69    1.15
   1   0  13    0.83    0.58
   1   0  13   -0.93    0.74
   1   0  14   77.46    3.51
   1   0  15   93.87    3.91
   1   0  16   71.20    3.23
   1   0  17    7.16    0.92
   1   0  18    8.18    0.87
  -1  -1  18  118.59    3.92
  -1  -1  17   21.53    1.40
  -1  -1  17   23.06    1.62
  -1  -1  16  221.01    6.79
  -1  -1  16  238.17    7.16
  -1  -1  15   18.95    1.64
  -1  -1  14   14.97    1.48
  -1  -1  13   13.69    1.83
  -1  -1  13   13.99    1.41
  -1  -1  12   29.65    1.92
  -1  -1  12   30.81    2.03
  -1  -1  12   28.81    2.55
  -1  -1  11  152.00    5.09
  -1  -1  11  156.84    6.39
  -1  -1  11  159.72    5.31
  -1  -1  10  559.45   15.14
  -1  -1  10  537.80   13.66
  -1  -1   9  143.56    5.52
  -1  -1   8   93.53    3.96
  -1  -1   7    9.98    1.06
  -1  -1   6  334.67    9.03
  -1  -1   5  405.15   10.28
  -1  -1   4  447.46   10.91
  -1  -1   3  653.81   15.03
  -1  -1   2  120.49    3.30
  -1  -1   1  262.60    6.16
  -1  -1   0   74.06    2.00
  -1  -1   0   68.13    1.93
   1   1   1 6151.70  131.34
  -1  -1  -1 6114.86  131.34
  -1  -1  -2 1887.98   40.25
   1   1   2 1789.35   40.08
  -1  -1  -2 1880.79   40.04
  -1  -1  -3 8238.36  174.07
   1   1   3 8052.61  173.88
  -1  -1  -3 8086.73  173.69
  -1  -1  -4   25.73    1.03
   1   1   4   25.67    1.23
  -1  -1  -5  139.93    3.70
   1   1   5  147.93    4.20
   1   1   6  136.21    4.25
  -1  -1  -6  134.96    3.57
   1   1   7   30.22    1.76
   1   1   8  628.88   15.57
  -1  -1  -9  548.66   15.20
   1   1   9  608.45   14.91
  -1  -1 -10   16.06    1.66
   1   1  10   12.52    1.38
   1   1  11  900.31   22.14
   1   1  11  915.25   21.08
   1   1  12    3.49    0.70
   1   1  12    3.26    0.74
   1   1  12    2.00    0.68
   1   1  13   59.03    3.66
   1   1  13   74.59    3.31
   1   1  14    4.16    0.81
   1   1  15   64.64    3.16
   1   1  16    1.93    0.57
   1   1  17    5.02    0.78
   1   1  18    8.10    0.87
  -1  -2  18   25.90    1.35
  -1  -2  18   30.95    1.56
  -1  -2  17   73.21    2.99
  -1  -2  17   68.15    2.79
  -1  -2  16   17.65    1.46
  -1  -2  16   15.41    1.36
  -1  -2  15   10.55    1.20
  -1  -2  14   -0.20    0.50
  -1  -2  13    0.15    0.37
  -1  -2  13   -0.14    0.48
  -1  -2  12   49.97    2.53
  -1  -2  12   49.48    2.64
  -1  -2  12   48.02    3.45
  -1  -2  11   81.04    3.32
  -1  -2  11   90.17    4.65
  -1  -2  11   85.40    3.51
  -1  -2  10  553.23   13.77
  -1  -2  10  542.23   13.55
  -1  -2  10  560.78   15.46
  -1  -2   9  215.83    7.45
  -1  -2   8   52.39    2.95
  -1  -2   7  243.21    7.50
  -1  -2   6   24.12    1.67
  -1  -2   5  294.35    8.05
  -1  -2   4   48.88    2.14
  -1  -2   3 1495.14   33.19
  -1  -2   2 2855.52   61.94
  -1  -2   1  660.28   14.95
  -1  -2   0    9.60    0.64
   1   2   1   48.56    1.74
   1   2   2  129.75    3.59
   1   2   3    1.14    0.30
  -1  -2  -3    1.73    0.24
  -1  -2  -3    1.75    0.29
  -1  -2  -4 1157.44   24.73
   1   2   4 1093.14   24.80
  -1  -2  -4 1088.32   24.15
   1   2   5  940.59   21.88
  -1  -2  -5  976.14   21.86
   1   2   6  218.63    6.26
  -1  -2  -6  225.54    6.27
   1   2   6  218.70    6.19
  -1  -2  -7 1051.31   24.96
   1   2   7 1103.14   25.04
   1   2   8 1500.53   33.97
  -1  -2  -8 1455.05   33.94
  -1  -2  -9   76.29    3.51
   1   2   9   74.41    3.44
   1   2  10 2948.48   66.03
   1   2  11  102.53    3.86
   1   2  11   95.35    4.42
   1   2  12   79.81    3.43
   1   2  12   79.57    4.11
   1   2  13   61.98    3.03
   1   2  13   64.04    3.75
   1   2  14   21.70    1.73
   1   2  15   53.18    2.81
   1   2  16   19.09    1.57
   1   2  17    2.89    0.60
   1   2  18   54.81    2.40
  -1  -3  17   13.72    1.11
  -1  -3  17   14.29    1.13
  -1  -3  16    6.96    0.90
  -1  -3  16    6.57    0.91
  -1  -3  15   34.80    2.13
  -1  -3  14   62.64    3.06
  -1  -3  14   60.83    2.88
  -1  -3  13    0.21    0.38
  -1  -3  13    1.13    0.51
  -1  -3  12   -0.05    0.36
  -1  -3  12   -0.44    0.40
  -1  -3  12   -0.20    0.38
  -1  -3  11  681.37   18.90
  -1  -3  11  672.67   16.45
  -1  -3  11  672.61   16.65
  -1  -3  10  808.64   19.38
  -1  -3  10  812.78   19.20
  -1  -3  10  807.96   21.43
  -1  -3   9  192.51    7.14
  -1  -3   8  306.80    9.54
  -1  -3   7   55.55    3.01
  -1  -3   6   98.98    4.01
  -1  -3   5  295.99    8.31
  -1  -3   4  507.07   12.61
  -1  -3   3  147.03    4.49
  -1  -3   2 1037.93   23.50
  -1  -3   1 2027.74   44.50
   1   3   0  720.66   16.45
  -1  -3   0  706.43   16.36
   1   3   1 2159.69   47.34
   1   3   2    9.42    0.79
   1   3   3   71.18    2.57
   1   3   4 1331.97   29.89
   1   3   5    5.32    0.67
   1   3   6  685.06   16.78
  -1  -3  -6  710.11   16.34
   1   3   7  539.82   13.69
  -1  -3  -7  541.52   13.21
   1   3   8  514.23   13.39
   1   3   9 1355.15   31.87
   1   3  10   45.08    2.81
   1   3  11   52.67    3.18
   1   3  11   50.49    2.55
   1   3  12    2.20    0.60
   1   3  12    1.95    0.64
   1   3  13   80.36    3.54
   1   3  13   74.76    4.22
   1   3  14   45.94    2.62
   1   3  15   27.87    1.98
   1   3  16   59.82    2.92
   1   3  17  121.57    4.33
   1   3  18    1.82    0.47
  -1  -4  17   32.48    1.73
  -1  -4  17   34.07    1.66
  -1  -4  16   20.64    1.54
  -1  -4  16   19.09    1.38
  -1  -4  15   12.61    1.22
  -1  -4  14    7.96    0.99
  -1  -4  14    6.49    0.89
  -1  -4  13  353.97    9.77
  -1  -4  13  359.06    9.94
  -1  -4  12   23.65    1.72
  -1  -4  12   19.91    2.36
  -1  -4  12   22.96    1.63
  -1  -4  11    4.78    1.17
  -1  -4  11    5.60    0.83
  -1  -4  11    6.31    0.89
  -1  -4  10  470.94   14.20
  -1  -4  10  453.38   11.80
  -1  -4  10  462.37   11.72
  -1  -4   9   54.15    3.50
  -1  -4   9   53.72    2.40
  -1  -4   8  158.02    6.30
  -1  -4   7    0.32    0.45
  -1  -4   6   40.91    2.56
  -1  -4   5  215.06    6.85
  -1  -4   4 1113.93   26.04
  -1  -4   3  571.29   14.13
  -1  -4   2 1350.05   30.58
  -1  -4   1   53.19    2.26
   1   4   0   85.87    3.10
   1   4   1 1141.52   26.00
   1   4   2    6.80    0.77
   1   4   3   75.70    2.89
   1   4   4    4.71    0.68
   1   4   5   60.91    2.66
   1   4   6   37.96    2.11
   1   4   7   18.88    1.52
   1   4   8  125.88    4.85
   1   4   8  127.98    4.81
   1   4   9  110.15    4.63
   1   4  10   13.61    1.23
   1   4  10   14.55    1.63
   1   4  11  100.22    4.75
   1   4  11   93.65    3.76
   1   4  12  159.37    5.50
   1   4  12  161.31    6.53
   1   4  13  178.77    6.01
   1   4  13  177.00    7.12
   1   4  14   38.95    2.37
   1   4  15  265.27    8.01
   1   4  16  193.96    6.20
   1   4  17   63.21    2.77
   1   4  18  119.57    3.89
  -1  -4 -18  126.65    4.21
  -1  -5  17   20.58    1.28
  -1  -5  16    9.33    0.86
  -1  -5  16    9.80    1.02
  -1  -5  15  268.02    7.50
  -1  -5  14   77.29    3.21
  -1  -5  14   77.31    3.25
  -1  -5  13    1.72    0.55
  -1  -5  13    2.07    0.62
  -1  -5  12  247.25    7.42
  -1  -5  12  251.30    7.37
  -1  -5  11  409.78   10.74
  -1  -5  11  401.24   13.42
  -1  -5  11  395.75   10.64
  -1  -5  10    3.29    1.11
  -1  -5  10    3.40    0.68
  -1  -5  10    2.84    0.60
  -1  -5   9  168.85    5.28
  -1  -5   9  171.13    5.07
  -1  -5   9  164.67    7.13
  -1  -5   8   19.14    2.09
  -1  -5   7   26.25    2.30
  -1  -5   6   31.34    2.39
  -1  -5   5   50.78    2.92
  -1  -5   4    8.38    1.09
  -1  -5   3 1936.51   43.82
  -1  -5   2    0.51    0.34
   1   5  -1  337.74    9.04
  -1  -5   1  323.03    8.89
   1   5   0  485.95   12.34
   1   5   1    0.85    0.36
   1   5   2  279.51    7.78
   1   5   3  928.03   21.84
   1   5   4   91.93    3.61
   1   5   5   44.48    2.36
   1   5   6  240.60    7.31
   1   5   7  268.25    8.13
   1   5   8  211.92    7.08
   1   5   9   48.05    3.00
   1   5   9   47.66    2.92
   1   5  10  433.70   12.38
  -1  -5 -10  396.47   10.81
   1   5  10  407.16   10.74
   1   5  11  380.19   10.30
  -1  -5 -11  364.10   10.18
   1   5  11  399.07   11.95
   1   5  12   83.92    4.54
   1   5  12   79.03    3.52
  -1  -5 -12   78.63    3.35
   1   5  13   81.29    3.62
   1   5  14  182.97    6.16
   1   5  15   44.28    2.49
   1   5  16  219.97    6.69
   1   5  17   97.68    3.57
  -1  -5 -17  103.65    4.01
  -1  -5 -18   27.14    1.60
   1   5  18   26.31    1.38
  -1  -6  17    4.24    0.53
  -1  -6  16   20.19    1.37
  -1  -6  15   20.57    1.58
  -1  -6  14    0.91    0.42
  -1  -6  13  133.04    4.61
  -1  -6  12   14.17    1.29
  -1  -6  11   38.88    2.18
  -1  -6  10  264.78    7.25
  -1  -6  10  258.96    7.52
  -1  -6  10  253.09   10.03
  -1  -6   9   14.16    1.24
  -1  -6   9   15.58    2.10
  -1  -6   8    5.54    0.73
  -1  -6   8    4.55    1.11
  -1  -6   7    1.16    0.42
  -1  -6   7    0.09    0.58
  -1  -6   6   16.51    1.86
  -1  -6   5   60.61    3.48
  -1  -6   4  217.00    7.36
  -1  -6   3  524.22   13.96
   1   6  -2 2623.61   57.16
  -1  -6   2 2469.25   56.94
   1   6  -1  101.49    4.07
   1   6   0  603.14   15.29
   1   6   1    1.58    0.54
   1   6   2  225.87    6.87
   1   6   3  100.39    3.96
   1   6   4  266.85    7.96
   1   6   5  209.96    6.76
   1   6   6  325.66    9.51
   1   6   7    7.70    1.11
   1   6   8  258.99    8.46
   1   6   9   16.81    1.85
  -1  -6  -9   14.12    1.33
   1   6  10  475.53   13.55
  -1  -6 -10  436.67   11.95
   1   6  11    1.25    0.63
  -1  -6 -11    0.48    0.38
   1   6  12   22.55    2.33
   1   6  12   19.23    1.62
  -1  -6 -12   17.78    1.55
   1   6  13   27.15    1.83
   1   6  13   25.72    1.89
   1   6  14   20.09    1.49
   1   6  14   21.89    1.70
  -1  -6 -15  104.45    4.60
   1   6  15   97.71    3.92
   1   6  16   42.41    2.18
  -1  -6 -16   39.79    2.47
   1   6  17   37.31    1.84
  -1  -6 -17   43.12    2.28
  -1  -6 -18    8.79    0.85
  -1  -7  16   11.66    0.94
  -1  -7  15   17.92    1.35
  -1  -7  14    8.37    0.88
  -1  -7  13  100.55    3.74
  -1  -7  12    0.92    0.43
  -1  -7  11  116.25    4.27
  -1  -7  10   52.40    2.40
  -1  -7  10   49.53    2.53
  -1  -7   9   19.87    2.42
  -1  -7   9   21.56    1.56
  -1  -7   8   29.26    2.87
  -1  -7   8   36.37    2.02
  -1  -7   7   14.45    1.20
  -1  -7   7   13.72    1.97
  -1  -7   7   13.05    1.13
  -1  -7   6    0.37    0.32
  -1  -7   6    1.06    0.59
  -1  -7   6    0.74    0.38
  -1  -7   5   17.78    1.99
   1   7  -4    0.56    0.52
  -1  -7   4    2.89    0.85
   1   7  -3 1733.66   40.63
   1   7  -2 1105.40   26.87
   1   7  -1  705.18   18.08
   1   7   0   40.16    2.50
   1   7   1  807.77   20.03
   1   7   2  250.13    7.75
   1   7   3  545.57   14.35
   1   7   4  219.33    7.19
   1   7   5  789.88   19.87
   1   7   6   40.71    2.63
   1   7   7  379.61   11.25
  -1  -7  -8   18.11    1.64
   1   7   8   16.56    1.79
   1   7   8   16.22    1.37
  -1  -7  -8   17.67    1.52
  -1  -7  -9   69.09    3.34
  -1  -7  -9   73.87    3.73
   1   7   9   76.55    4.16
   1   7   9   75.04    3.29
  -1  -7 -10  878.69   21.59
   1   7  10  869.66   21.31
  -1  -7 -10  846.53   22.26
  -1  -7 -11    0.26    0.57
  -1  -7 -11   -0.20    0.57
   1   7  11    0.68    0.51
   1   7  11    0.21    0.50
  -1  -7 -12    0.80    0.64
   1   7  12    1.58    0.56
  -1  -7 -13   34.48    2.64
   1   7  13   33.91    2.05
  -1  -7 -14   19.61    1.96
   1   7  14   21.33    1.50
  -1  -7 -15   11.56    1.39
  -1  -7 -16   76.17    3.46
  -1  -7 -17   51.89    2.46
  -1  -7 -18   71.56    2.58
  -1  -8  15    9.35    0.86
  -1  -8  14  153.43    5.02
  -1  -8  14  159.76    4.69
  -1  -8  13    1.72    0.52
  -1  -8  12  258.37    7.39
  -1  -8  11   10.73    1.12
  -1  -8  10   56.01    2.54
  -1  -8  10   52.59    2.65
  -1  -8   9   38.83    2.21
  -1  -8   8  181.36    8.37
   1   8  -8  194.44    8.67
   1   8  -7   47.60    3.80
  -1  -8   7   51.16    3.87
  -1  -8   7   52.28    2.53
  -1  -8   6   65.69    2.79
  -1  -8   6   69.52    2.93
  -1  -8   6   69.44    2.77
  -1  -8   6   64.72    4.29
   1   8  -6   64.23    4.26
  -1  -8   5   47.08    2.20
  -1  -8   5   50.60    2.37
   1   8  -5   49.39    3.55
   1   8  -4  395.00   12.40
   1   8  -3  538.11   15.37
   1   8  -2    2.22    0.83
   1   8  -1    0.79    0.58
   1   8   0    7.46    1.12
   1   8   1   74.78    3.74
   1   8   2  254.45    8.22
   1   8   3  304.79    9.40
   1   8   4  108.32    4.74
   1   8   5  300.76    9.48
  -1  -8  -6  317.91    9.25
   1   8   6  326.39    8.88
  -1  -8  -6  330.72    9.31
   1   8   6  319.70   10.06
  -1  -8  -7  513.38   13.05
   1   8   7  480.38   12.37
   1   8   7  514.19   13.98
  -1  -8  -8  322.74    9.48
  -1  -8  -8  288.19    9.03
   1   8   8  300.14    8.73
   1   8   8  323.75   10.25
   1   8   9    0.10    0.72
  -1  -8  -9    0.54    0.54
   1   8   9    0.70    0.52
  -1  -8 -10    8.06    1.29
   1   8  10    7.80    1.08
   1   8  10    7.62    1.38
   1   8  10    6.72    1.41
   1   8  11    3.00    0.66
  -1  -8 -11    2.98    0.85
  -1  -8 -12   84.35    4.41
   1   8  12   95.27    3.87
  -1  -8 -13    2.14    0.80
   1   8  13    3.17    0.70
   1   8  14   94.82    3.58
  -1  -8 -14  102.55    4.60
   1   8  15   47.31    2.08
  -1  -8 -15   48.53    2.81
  -1  -8 -16   -0.19    0.42
  -1  -8 -17    0.24    0.34
  -1  -9  14   11.38    0.94
  -1  -9  14   11.01    0.81
  -1  -9  13  236.17    6.91
  -1  -9  13  248.32    6.62
  -1  -9  12    0.17    0.38
  -1  -9  12    0.21    0.35
  -1  -9  11  149.44    4.94
  -1  -9  10   32.00    1.96
  -1  -9  10   30.46    1.79
  -1  -9   9    9.52    1.09
  -1  -9   8   45.05    2.44
   1   9  -7   23.76    2.85
  -1  -9   7   20.54    1.56
   1   9  -6   37.21    3.44
  -1  -9   6   43.68    2.22
  -1  -9   6   44.98    2.37
  -1  -9   6   44.68    2.22
  -1  -9   5  410.94   10.63
  -1  -9   5  397.77   10.34
  -1  -9   4  121.33    4.07
   1   9  -4  114.21    5.88
  -1  -9   4  127.54    4.36
  -1  -9   3  103.59    3.82
   1   9  -3  100.45    5.26
  -1  -9   3  106.23    3.60
  -1  -9   2    0.43    0.45
   1   9  -2    0.57    0.55
  -1  -9   1  118.37    4.13
   1   9  -1  110.23    5.23
   1   9   0   59.15    3.52
   1   9   1  168.78    6.52
   1   9   2  131.41    5.53
  -1  -9  -3    4.01    0.71
   1   9   3    5.04    0.72
   1   9   3    5.15    1.05
   1   9   4  567.65   13.86
  -1  -9  -4  547.34   14.14
   1   9   4  550.01   15.47
   1   9   5  114.81    5.21
  -1  -9  -5  117.66    4.49
   1   9   5  118.24    4.21
  -1  -9  -6  908.70   22.26
   1   9   6  895.92   23.36
   1   9   6  925.29   21.81
   1   9   7  214.98    6.80
  -1  -9  -7  224.50    7.32
   1   9   7  224.25    8.15
   1   9   8  620.59   16.42
  -1  -9  -8  661.06   17.19
   1   9   9   52.13    3.59
   1   9   9   42.81    2.53
  -1  -9  -9   46.35    2.98
   1   9  10   68.25    3.29
  -1  -9 -10   65.64    3.73
   1   9  11    0.27    0.40
  -1  -9 -11    0.26    0.50
  -1  -9 -12   96.08    4.71
   1   9  12  107.10    4.16
   1   9  13   44.41    2.34
  -1  -9 -13   39.18    2.75
   1   9  14   84.07    3.21
  -1  -9 -14   84.82    3.98
  -1  -9 -15   38.33    2.34
  -1  -9 -16    2.33    0.54
  -1  -9 -17    6.22    0.67
  -1 -10  13    7.55    0.67
  -1 -10  13    6.88    0.71
  -1 -10  12   91.37    3.12
  -1 -10  12   86.10    3.25
  -1 -10  11    0.28    0.35
  -1 -10  11    0.50    0.36
  -1 -10  10   30.28    1.82
  -1 -10  10   27.62    1.63
  -1 -10  10   28.27    1.88
  -1 -10   9    1.40    0.53
  -1 -10   8    0.02    0.37
  -1 -10   7   -0.49    0.55
  -1 -10   6  230.51    6.87
  -1 -10   6  237.49    7.16
  -1 -10   6  239.59    6.91
  -1 -10   5  107.66    3.91
  -1 -10   5  113.58    4.19
  -1 -10   4 1215.04   27.48
  -1 -10   4 1225.69   27.89
  -1 -10   3  121.04    4.36
   1  10  -3  110.21    5.83
  -1 -10   3  122.18    4.07
  -1 -10   2    6.65    0.94
  -1 -10   2    7.23    0.81
   1  10  -2    7.52    1.42
   1  10  -1   91.01    4.94
  -1 -10   1   95.77    3.75
  -1 -10   1   98.98    3.45
  -1 -10   0   90.28    3.61
   1  10   0   86.91    4.66
   1  10   1   70.96    4.07
  -1 -10  -1   68.98    3.08
   1  10   2   26.88    2.43
  -1 -10  -2   28.69    1.88
   1  10   3  134.08    5.93
  -1 -10  -3  134.73    4.83
   1  10   4    1.73    0.51
   1  10   4    2.28    0.96
  -1 -10  -4    3.79    0.76
   1  10   5  424.38   13.12
  -1 -10  -5  431.26   11.93
   1  10   5  455.76   11.67
  -1 -10  -6   20.86    1.77
   1  10   6   21.07    2.22
   1  10   6   22.27    1.68
   1  10   7  369.65   11.76
  -1 -10  -7  365.52   10.64
   1  10   7  353.21   10.09
   1  10   8  130.21    6.00
  -1 -10  -8  130.72    5.32
   1  10   8  124.01    4.81
  -1 -10  -9    7.32    1.22
   1  10   9    6.60    1.01
  -1 -10 -10    8.32    1.31
   1  10  10    8.04    1.08
   1  10  11  253.28    7.56
  -1 -10 -11  228.41    8.14
  -1 -10 -12    4.74    1.01
   1  10  12    5.62    0.86
  -1 -10 -13  294.98    9.13
  -1 -10 -14   24.84    1.92
  -1 -10 -15   93.50    3.64
  -1 -10 -16   16.98    1.18
  -1 -11  12    1.33    0.32
  -1 -11  11    0.44    0.28
  -1 -11  10   45.51    2.14
  -1 -11  10   44.03    1.97
  -1 -11   9   61.71    2.73
  -1 -11   8   23.95    1.67
  -1 -11   7   20.20    1.58
  -1 -11   6   36.18    2.18
  -1 -11   6   37.02    2.04
  -1 -11   5 1071.23   25.05
  -1 -11   5 1079.14   25.51
  -1 -11   5 1092.98   25.29
  -1 -11   4  200.76    6.41
  -1 -11   4  205.66    6.10
   1  11  -3   31.27    3.05
  -1 -11   3   34.19    2.12
  -1 -11   2  524.82   13.21
   1  11  -2  470.07   15.31
   1  11  -1    5.97    1.38
  -1 -11   1    8.54    1.05
   1  11   0   10.78    1.76
  -1 -11   0    7.46    0.98
  -1 -11  -1   62.25    2.98
   1  11   1   56.31    3.84
   1  11   2    2.41    0.99
  -1 -11  -2    2.17    0.63
   1  11   3   34.44    2.96
  -1 -11  -3   37.01    2.28
  -1 -11  -4  364.48   10.29
   1  11   4  355.46   11.66
   1  11   5    0.14    0.65
  -1 -11  -5   -0.07    0.46
  -1 -11  -6   41.79    2.61
   1  11   6   44.80    3.30
  -1 -11  -7   73.14    3.68
   1  11   8    8.93    1.13
  -1 -11  -8    8.91    1.30
  -1 -11  -9  147.05    5.82
   1  11   9  150.77    5.40
  -1 -11 -10   70.27    3.72
  -1 -11 -11  141.04    5.58
  -1 -11 -12  105.27    4.50
  -1 -11 -13    9.41    1.20
  -1 -11 -14  229.76    6.88
  -1 -11 -15   18.87    1.28
  -1 -12  10    9.90    0.82
  -1 -12   9   22.61    1.38
  -1 -12   9   17.48    1.17
  -1 -12   8    0.36    0.36
  -1 -12   7  205.55    6.27
  -1 -12   6  100.17    3.69
  -1 -12   6  110.08    4.06
  -1 -12   5  171.97    5.66
  -1 -12   5  173.54    5.49
  -1 -12   4   61.38    2.94
  -1 -12   3  120.01    4.47
  -1 -12   2  110.11    4.24
  -1 -12   1   29.28    1.97
  -1 -12   0  155.76    5.41
  -1 -12  -1  168.58    5.76
  -1 -12  -2   80.26    3.57
  -1 -12  -3  346.79    9.91
  -1 -12  -4  147.05    5.39
  -1 -12  -5   18.14    1.66
  -1 -12  -6    0.14    0.47
  -1 -12  -7   46.49    2.82
  -1 -12  -8    0.36    0.50
  -1 -12  -9   18.17    1.71
  -1 -12 -10  144.69    5.48
  -1 -12 -11   52.89    2.91
  -1 -12 -12   33.37    2.14
  -1 -12 -13  102.83    3.86
  -1 -12 -14   55.80    2.37
  -1 -13   9    0.50    0.24
  -1 -13   9    0.33    0.23
  -1 -13   8   33.14    1.65
  -1 -13   8   30.85    1.56
  -1 -13   7   15.33    1.20
  -1 -13   6  232.65    6.58
  -1 -13   6  217.15    6.20
  -1 -13   5  114.00    4.01
  -1 -13   5  127.19    4.33
  -1 -13   4   68.81    2.98
  -1 -13   4   61.19    2.77
  -1 -13   3  109.72    4.13
  -1 -13   2  186.55    5.97
  -1 -13   1    7.08    0.98
  -1 -13   0   90.01    3.72
  -1 -13  -1   30.95    2.04
  -1 -13  -2  272.35    8.16
  -1 -13  -3   93.90    3.95
  -1 -13  -4  197.83    6.54
  -1 -13  -5   56.74    2.99
  -1 -13  -6   74.92    3.53
  -1 -13  -7    0.37    0.46
  -1 -13  -8   79.02    3.65
  -1 -13  -9    1.65    0.56
  -1 -13 -10   94.20    3.90
  -1 -13 -11   18.22    1.49
  -1 -13 -12   94.43    3.53
  -1 -13 -13    8.42    0.81
  -1 -14   7   69.80    2.46
  -1 -14   6   60.87    2.40
  -1 -14   5   16.90    1.13
  -1 -14   5   17.06    1.22
  -1 -14   4    4.96    0.67
  -1 -14   4    5.55    0.74
  -1 -14   3   26.04    1.62
  -1 -14   3   28.35    1.71
  -1 -14   2  102.77    3.80
  -1 -14   1    2.03    0.55
  -1 -14   0    0.96    0.48
  -1 -14  -1   70.72    3.13
  -1 -14  -2    3.05    0.72
  -1 -14  -3  205.23    6.45
  -1 -14  -4    5.31    0.86
  -1 -14  -5   56.40    2.82
  -1 -14  -6   17.72    1.49
  -1 -14  -7   19.02    1.53
  -1 -14  -8    5.47    0.80
  -1 -14  -9   66.32    2.94
  -1 -14 -10    0.00    0.41
  -1 -14 -11   21.88    1.39
  -1 -14 -12   -0.12    0.25
  -1 -15   6   20.06    1.04
  -1 -15   5   16.94    1.02
  -1 -15   4   11.63    0.86
  -1 -15   4   12.42    0.93
  -1 -15   3    7.16    0.73
  -1 -15   3    7.62    0.77
  -1 -15   2   19.21    1.27
  -1 -15   2   17.08    1.21
  -1 -15   1   44.95    2.17
  -1 -15   1   46.36    2.15
  -1 -15   0   90.67    3.31
   1  15   0   86.07    2.95
  -1 -15  -1    6.58    0.82
  -1 -15  -2  256.97    7.24
  -1 -15  -3   73.98    3.04
  -1 -15  -4   75.49    3.08
  -1 -15  -5    8.34    0.94
  -1 -15  -6    0.11    0.33
  -1 -15  -7    4.57    0.70
  -1 -15  -8   11.89    1.03
  -1 -15  -9    6.97    0.74
  -1 -15 -10   37.34    1.68
  -1 -16   2    7.49    0.65
  -1 -16   2    7.53    0.66
  -1 -16   1   10.40    0.81
  -1 -16   1   10.98    0.86
  -1 -16   0   16.08    1.11
  -1 -16   0   17.57    1.09
  -1 -16  -1   69.50    2.54
  -1 -16  -1   68.42    2.63
  -1 -16  -2    5.15    0.63
   1  16   2    3.73    0.48
  -1 -16  -3   22.50    1.31
  -1 -16  -4   63.31    2.43
  -1 -16  -5    0.37    0.29
  -1 -16  -6    3.98    0.54
  -1 -16  -7    0.47    0.26
  -2  15   6   23.55    1.19
  -2  15   5    3.20    0.44
   2 -15  -5    1.95    0.40
   2 -15  -4    1.10    0.33
  -2  15   4    1.62    0.37
   2 -15  -3   20.17    1.24
  -2  15   3   19.36    1.14
  -2  15   2    2.57    0.43
   2 -15  -2    2.03    0.40
  -2  15   1    0.63    0.27
   2 -15  -1    0.75    0.32
  -2  15   0    0.75    0.28
   2 -15   0    1.31    0.41
  -2  15  -1   99.04    3.02
   2 -15   1  107.70    3.33
   2 -15   2   41.38    1.74
   2 -14  -9   69.15    2.51
  -2  14   8   59.72    2.19
   2 -14  -8   59.87    2.43
  -2  14   7  100.83    3.23
   2 -14  -7  105.56    3.65
  -2  14   6    6.63    0.66
   2 -14  -6    7.29    0.85
   2 -14  -5   32.16    1.84
   2 -14  -4   18.52    1.39
   2 -14  -3    8.62    0.95
  -2  14   2    2.81    0.52
   2 -14  -2    1.59    0.44
   2 -14  -1    3.02    0.58
  -2  14   1    2.13    0.45
  -2  14   0   80.10    2.98
   2 -14   0   81.56    3.16
   2 -14   1   14.33    1.18
  -2  14  -1   13.32    1.03
   2 -14   2  177.91    5.25
  -2  14  -2  169.48    4.92
  -2  14  -3   11.93    0.88
   2 -14   3   12.08    1.00
   2 -14   4   13.26    1.03
   2 -14   5   18.32    1.13
   2 -14   6    3.11    0.43
   2 -13 -11   12.09    0.90
  -2  13  11   12.59    0.89
  -2  13  10   46.39    1.96
   2 -13 -10   38.51    1.96
   2 -13  -9   53.01    2.48
   2 -13  -8  106.94    4.00
   2 -13  -7   58.79    2.82
   2 -13  -6   15.35    1.39
  -2  13   6   13.50    1.11
   2 -13  -5    3.52    0.70
  -2  13   5    3.01    0.55
   2 -13  -4   28.81    1.95
   2 -13  -3   39.60    2.30
   2 -13  -2   -0.11    0.39
   2 -13  -1   41.36    2.31
   2 -13   0   21.13    1.59
  -2  13   0   19.95    1.45
  -2  13  -1  126.08    4.30
   2 -13   1  128.42    4.54
   2 -13   2   23.54    1.65
  -2  13  -2   21.61    1.46
   2 -13   3    4.73    0.77
  -2  13  -3    3.47    0.58
   2 -13   4  130.63    4.40
  -2  13  -4  128.84    4.07
   2 -13   5    0.15    0.32
   2 -13   6    8.34    0.85
   2 -13   7   20.48    1.25
   2 -13   8   50.16    1.92
  -2  12  13    3.43    0.43
   2 -12 -12    0.95    0.35
  -2  12  12    1.23    0.36
   2 -12 -11    2.75    0.57
   2 -12 -10   49.63    2.54
   2 -12  -9   15.56    1.42
   2 -12  -8  107.38    4.33
   2 -12  -7    0.25    0.46
   2 -12  -6   12.09    1.35
   2 -12  -5   31.25    2.15
   2 -12  -4    5.65    0.93
   2 -12  -3   -0.45    0.57
  -2  12   3   -0.16    0.33
   2 -12  -2  201.53    6.57
   2 -12  -1   45.68    2.57
   2 -12   0  263.13    7.91
  -2  12  -1   24.69    1.69
   2 -12   1   24.06    1.83
  -2  12  -2  229.80    6.84
   2 -12   2  233.48    7.12
   2 -12   3   73.07    3.29
  -2  12  -3   76.33    3.13
  -2  12  -4  143.95    4.70
   2 -12   4  142.27    4.96
  -2  12  -5    6.48    0.78
   2 -12   5    5.77    0.87
   2 -12   6   -0.14    0.46
   2 -12   7    9.27    0.96
   2 -12   8   33.23    1.75
   2 -12   9   28.17    1.47
   2 -12  10   86.35    2.74
  -2  11  14    0.98    0.27
   2 -11 -13   32.64    1.73
   2 -11 -12   -0.20    0.34
   2 -11 -11   63.72    3.06
   2 -11 -10   33.18    2.23
   2 -11  -9  135.07    5.23
   2 -11  -8   19.35    1.77
   2 -11  -7   96.05    4.26
   2 -11  -6    0.56    0.52
   2 -11  -5   17.30    1.65
   2 -11  -4    2.03    0.63
   2 -11  -3  186.87    6.36
   2 -11  -2   16.34    1.55
   2 -11  -1  309.90    9.07
   2 -11   0   34.51    2.24
   2 -11   1   11.13    1.25
   2 -11   2    8.66    1.13
  -2  11  -2   10.95    1.14
  -2  11  -3    1.89    0.60
   2 -11   3    2.04    0.65
   2 -11   4   10.60    1.21
  -2  11  -4   11.27    1.15
   2 -11   5    0.70    0.49
  -2  11  -5    0.63    0.37
  -2  11  -6    5.64    0.76
   2 -11   6    4.86    0.83
   2 -11   7   59.61    2.84
   2 -11   8   74.35    3.13
   2 -11   9  102.05    3.65
   2 -11  10   13.48    1.05
   2 -11  11    0.55    0.29
   2 -10 -14   12.21    1.03
   2 -10 -13   50.39    2.52
   2 -10 -12   10.71    1.23
   2 -10 -11  182.34    6.40
   2 -10 -10  224.87    7.57
   2 -10  -9   21.04    1.90
   2 -10  -8    4.76    0.98
   2 -10  -7   48.46    2.92
   2 -10  -6    0.25    0.47
   2 -10  -5   41.96    2.59
   2 -10  -4   32.64    2.21
   2 -10  -3   31.88    2.13
   2 -10  -2  484.21   12.86
  -2  10   1   17.25    2.00
   2 -10  -1   18.37    1.58
   2 -10   0  105.15    4.20
  -2  10   0  109.39    5.66
  -2  10  -1   24.21    2.57
   2 -10   1   26.47    1.88
   2 -10   2   95.63    3.90
  -2  10  -2   86.79    5.25
  -2  10  -3    1.98    0.58
   2 -10   3    2.62    0.69
   2 -10   4    3.33    0.75
  -2  10  -4    3.98    0.75
   2 -10   5   26.05    1.88
  -2  10  -5   24.51    1.70
   2 -10   6  116.96    4.52
  -2  10  -6  119.78    4.26
   2 -10   7    8.75    1.13
   2 -10   8  167.40    5.66
   2 -10   9   51.51    2.58
   2 -10  10    0.75    0.46
   2 -10  11    5.09    0.71
   2 -10  12   61.11    2.33
  -2   9  15    1.05    0.27
   2  -9 -15    0.73    0.35
   2  -9 -14   22.95    1.60
   2  -9 -13   20.10    1.68
   2  -9 -12   44.74    2.75
   2  -9 -11   77.38    3.89
   2  -9 -10    0.59    0.74
  -2   9  10    0.68    0.56
   2  -9  -9  472.36   13.03
  -2   9   9  436.18   12.29
  -2   9   8   12.90    1.41
   2  -9  -8   14.62    1.60
  -2   9   7    6.52    1.02
   2  -9  -7    8.62    1.24
  -2   9   7    9.41    1.50
   2  -9  -6   26.86    2.04
  -2   9   6   23.07    2.24
  -2   9   6   22.26    1.82
   2  -9  -5   30.07    2.12
   2  -9  -4   50.71    2.74
   2  -9  -3  602.55   15.35
  -2   9   2   34.58    2.68
   2  -9  -2   33.37    2.10
   2  -9  -1  404.99   10.95
  -2   9   1  414.04   12.60
   2  -9   0  271.29    7.95
  -2   9   0  275.82    9.74
   2  -9   1  480.59   12.51
  -2   9  -1  480.91   14.76
  -2   9  -2  256.75    9.75
   2  -9   2  257.17    7.62
  -2   9  -3   15.83    2.10
   2  -9   3   14.88    1.37
  -2   9  -3   15.46    1.32
   2  -9   4   46.71    2.55
  -2   9  -4   50.60    2.48
  -2   9  -4   48.01    3.78
  -2   9  -5   37.31    2.12
  -2   9  -5   35.14    3.25
   2  -9   5   36.97    2.25
   2  -9   6   12.01    1.28
  -2   9  -6   13.80    1.24
   2  -9   7  136.56    5.02
   2  -9   8    9.64    1.20
   2  -9   9   87.30    3.69
   2  -9  10    3.98    0.78
   2  -9  11   31.37    1.86
   2  -9  12   10.39    0.98
   2  -9  13   49.39    2.07
   2  -8 -15    0.49    0.35
  -2   8  15    0.02    0.23
   2  -8 -14   50.75    2.71
   2  -8 -13   10.17    1.28
   2  -8 -12  257.22    8.72
  -2   8  12  285.55    8.02
  -2   8  11   60.88    2.97
   2  -8 -11   49.41    3.17
   2  -8 -10  299.19    9.71
  -2   8  10  313.00    9.09
   2  -8  -9   40.49    2.75
  -2   8   9   36.15    2.36
  -2   8   9   38.03    2.99
   2  -8  -8    3.77    0.89
  -2   8   8    2.87    0.76
  -2   8   8    3.70    1.05
  -2   8   7  157.44    5.74
  -2   8   7  167.48    6.65
   2  -8  -6    1.81    0.57
  -2   8   6    2.16    0.65
  -2   8   5    3.71    0.83
  -2   8   5    3.02    0.66
   2  -8  -5    2.57    0.62
   2  -8  -4  256.91    7.77
  -2   8   4  270.23    7.84
   2  -8  -3  277.46    8.10
  -2   8   3  293.92    8.77
  -2   8   3  277.79    8.11
  -2   8   2 1186.18   28.26
   2  -8  -2 1143.61   26.98
   2  -8  -1  206.23    6.32
  -2   8   1  212.50    7.60
   2  -8   0   10.49    1.20
  -2   8   0   39.46    2.97
   2  -8   1  108.44    3.98
  -2   8  -1  106.97    5.31
   2  -8   2    8.66    0.98
  -2   8  -2    9.68    1.64
   2  -8   3  167.57    5.42
  -2   8  -3  166.89    7.24
  -2   8  -3  167.37    6.68
   2  -8   4   21.79    1.60
  -2   8  -4   20.08    1.45
  -2   8  -4   18.51    2.24
  -2   8  -4   21.39    2.30
   2  -8   5  445.12   11.64
  -2   8  -5  422.54   13.98
  -2   8  -5  447.26   11.41
  -2   8  -5  420.38   13.82
  -2   8  -6   24.40    2.74
  -2   8  -6   23.29    1.62
   2  -8   6   25.38    1.80
  -2   8  -6   21.40    2.48
  -2   8  -7  163.05    5.19
  -2   8  -7  145.33    7.25
  -2   8  -7  149.92    7.03
   2  -8   7  153.14    5.42
   2  -8   8   47.92    2.65
   2  -8   9  171.72    5.84
   2  -8  10    0.68    0.55
   2  -8  11    4.37    0.84
   2  -8  12    8.38    0.96
   2  -8  13    0.03    0.39
   2  -8  14   -0.37    0.34
  -2   7  16   28.18    1.53
   2  -7 -16   29.75    1.65
  -2   7  15    1.38    0.49
   2  -7 -15    1.65    0.54
   2  -7 -14   30.75    2.18
  -2   7  14   29.49    1.96
   2  -7 -13  155.12    5.99
  -2   7  13  156.70    5.56
  -2   7  12   17.93    1.64
  -2   7  12   19.37    1.53
   2  -7 -12   17.84    1.85
   2  -7 -11  242.60    8.64
  -2   7  11  260.11    8.17
  -2   7  10   49.74    2.73
  -2   7  10   51.71    2.82
  -2   7  10   50.78    3.49
   2  -7 -10   52.53    3.23
  -2   7   9  445.44   13.29
  -2   7   9  414.22   11.72
  -2   7   9  444.82   11.87
   2  -7  -9  449.39   12.61
  -2   7   8   51.97    2.78
   2  -7  -8   58.45    3.19
  -2   7   8   59.04    3.56
  -2   7   7   39.33    2.74
   2  -7  -7   41.08    2.51
  -2   7   7   36.55    2.23
  -2   7   6  199.81    6.91
   2  -7  -6  214.31    6.68
  -2   7   6  192.60    6.27
  -2   7   5   27.49    1.82
  -2   7   5   28.66    2.05
   2  -7  -5   30.13    1.95
  -2   7   4   23.46    1.78
  -2   7   3  532.57   13.50
  -2   7   3  492.87   13.10
  -2   7   2  379.63   10.57
  -2   7   2  356.88    9.81
  -2   7   1   27.67    2.16
  -2   7   0  215.22    7.55
  -2   7  -1   97.97    4.09
  -2   7  -1   98.34    4.71
  -2   7  -2   -0.25    0.43
  -2   7  -2    0.70    0.69
  -2   7  -3   22.79    2.31
   2  -7   3   24.97    1.59
  -2   7  -3   21.42    2.04
  -2   7  -4  576.62   13.83
  -2   7  -4  534.85   15.88
  -2   7  -4  528.40   16.08
   2  -7   4  576.51   14.03
   2  -7   5    9.40    1.02
  -2   7  -5   10.46    1.01
  -2   7  -5    9.73    1.69
  -2   7  -6 1363.61   30.95
   2  -7   6 1376.57   31.28
  -2   7  -6 1295.14   33.72
  -2   7  -7  132.98    6.70
   2  -7   7  133.70    4.84
  -2   7  -7  127.61    6.22
  -2   7  -7  143.53    4.67
  -2   7  -8  852.56   24.08
   2  -7   8  875.79   20.85
  -2   7  -8  825.09   22.96
   2  -7   9    1.00    0.52
   2  -7  10    7.55    1.04
   2  -7  10    7.00    0.91
   2  -7  11   12.94    1.15
   2  -7  11   13.72    1.36
   2  -7  12    6.00    0.92
   2  -7  13   37.57    2.08
   2  -7  14    6.81    0.80
   2  -7  15    0.08    0.27
  -2   6  17    2.93    0.47
  -2   6  16   12.72    1.12
   2  -6 -16   10.79    1.07
  -2   6  15    6.12    0.91
   2  -6 -15    4.60    0.84
  -2   6  14   60.80    3.13
   2  -6 -14   63.29    3.38
   2  -6 -13    3.36    0.88
  -2   6  13    3.65    0.85
  -2   6  12  165.26    6.16
   2  -6 -12  172.71    6.71
  -2   6  12  186.71    5.86
  -2   6  11   -0.14    0.66
  -2   6  11    0.61    0.45
   2  -6 -11    0.28    0.55
  -2   6  11    1.42    0.58
  -2   6  10   15.66    1.51
  -2   6  10   14.00    1.84
   2  -6 -10   14.18    1.62
  -2   6  10   15.99    1.45
  -2   6   9    2.27    0.79
  -2   6   9    3.17    0.70
  -2   6   9    1.87    0.55
   2  -6  -9    2.15    0.73
  -2   6   8    4.19    0.78
  -2   6   8    4.94    0.81
  -2   6   8    6.26    1.09
   2  -6  -8    4.07    0.81
  -2   6   7  109.24    4.14
  -2   6   7  114.12    4.87
   2  -6  -7  120.60    4.60
  -2   6   6   25.90    2.00
  -2   6   5   50.66    2.66
  -2   6   4  809.75   19.64
  -2   6   4  821.17   19.32
  -2   6   3 1379.74   31.26
  -2   6   3 1354.60   31.42
  -2   6   2  717.30   17.17
  -2   6   2  721.64   17.76
  -2   6   1    5.58    0.94
  -2   6   1    5.76    0.70
  -2   6   0    0.78    0.34
  -2   6   0    0.23    0.47
  -2   6  -1    2.43    0.82
  -2   6  -1    0.95    0.46
  -2   6  -2  316.42    9.34
  -2   6  -2  312.66    9.84
  -2   6  -3  164.33    6.46
  -2   6  -4   25.84    2.34
  -2   6  -5  616.75   17.56
   2  -6   5  649.38   15.54
   2  -6   6   37.52    2.04
  -2   6  -6   37.26    1.91
  -2   6  -6   36.54    2.91
  -2   6  -7  619.20   17.53
   2  -6   7  623.66   15.43
  -2   6  -7  621.62   15.09
  -2   6  -8    3.87    1.10
   2  -6   8    4.00    0.77
   2  -6   9  168.78    5.61
  -2   6  -9  172.36    7.92
   2  -6   9  157.93    5.49
  -2   6  -9  164.79    6.93
   2  -6  10   80.72    3.44
   2  -6  10   78.57    3.48
   2  -6  11    3.82    0.73
   2  -6  11    3.93    0.81
   2  -6  12   96.29    3.89
   2  -6  12   94.19    3.65
   2  -6  13  152.71    4.89
   2  -6  13  148.43    5.08
   2  -6  14    0.43    0.49
   2  -6  14   -0.04    0.28
   2  -6  15  219.98    6.04
   2  -6  15  240.37    6.45
   2  -5 -17   34.26    1.73
  -2   5  17   35.56    1.84
  -2   5  16   16.39    1.39
   2  -5 -16   17.05    1.39
   2  -5 -15   33.16    2.22
  -2   5  15   31.26    2.13
   2  -5 -14    3.12    0.84
  -2   5  14    0.54    0.49
  -2   5  13  210.09    7.22
   2  -5 -13  213.80    7.56
  -2   5  12   35.88    2.49
  -2   5  12   37.26    2.18
   2  -5 -12   39.14    2.79
  -2   5  11  101.35    3.96
  -2   5  11  102.32    5.08
  -2   5  11   97.97    4.32
   2  -5 -11   91.45    4.53
  -2   5  10   34.11    2.72
   2  -5 -10   29.84    2.35
  -2   5  10   32.09    2.03
  -2   5  10   33.87    2.26
  -2   5   9   28.65    1.98
   2  -5  -9   30.29    2.23
  -2   5   9   30.66    1.93
  -2   5   9   30.53    2.46
  -2   5   8  139.69    4.84
  -2   5   8  152.88    5.83
  -2   5   7   81.36    3.85
  -2   5   6   19.28    1.61
  -2   5   5  749.38   18.25
  -2   5   4  349.48    9.01
  -2   5   4  354.54    9.37
  -2   5   3  191.97    5.59
  -2   5   3  187.68    5.62
  -2   5   2   56.17    2.58
  -2   5   2   55.96    2.29
  -2   5   1   55.45    2.16
  -2   5   1   51.17    2.14
  -2   5   1   54.08    2.64
  -2   5   0  474.12   11.09
  -2   5   0  447.08   11.46
  -2   5   0  446.87   12.14
  -2   5  -1 1066.28   23.81
  -2   5  -1 1072.66   25.41
  -2   5  -1 1031.13   24.61
  -2   5  -2  173.34    6.18
  -2   5  -3   35.26    2.48
  -2   5  -4   88.05    4.25
  -2   5  -5  416.62   12.25
  -2   5  -6  666.58   17.92
  -2   5  -7    0.79    0.64
   2  -5   7    0.62    0.32
   2  -5   8  157.49    5.18
  -2   5  -8  157.72    6.43
  -2   5  -9  191.71    7.19
   2  -5   9  191.71    5.93
  -2   5  -9  191.57    8.24
  -2   5 -10   42.31    3.74
   2  -5  10   44.34    2.50
   2  -5  10   44.00    2.43
   2  -5  11  356.94    9.81
   2  -5  11  342.05    9.70
   2  -5  12  154.61    5.35
   2  -5  12  167.45    5.59
   2  -5  13   48.95    2.47
   2  -5  13   45.43    2.49
   2  -5  14  296.45    8.24
   2  -5  14  304.65    8.49
   2  -5  15   12.03    1.05
   2  -5  15   12.68    1.14
   2  -5  16  104.42    3.33
  -2   4  18    0.88    0.33
   2  -4 -17   54.80    2.37
  -2   4  17   52.71    2.48
   2  -4 -16  109.11    4.17
  -2   4  16  107.96    4.21
  -2   4  15    0.64    0.48
   2  -4 -15    2.12    0.66
  -2   4  14  144.34    5.62
   2  -4 -14  150.72    5.85
  -2   4  13   16.54    1.71
  -2   4  12  194.73    6.87
  -2   4  12  196.83    6.14
  -2   4  12  197.81    7.76
  -2   4  11  152.21    6.36
  -2   4  11  142.66    5.50
  -2   4  11  149.14    5.07
  -2   4  10   11.69    1.29
  -2   4  10   10.66    1.13
  -2   4  10   13.96    1.67
  -2   4   9   15.00    1.42
  -2   4   9   15.36    1.71
  -2   4   8   19.41    1.79
  -2   4   7  520.38   13.88
  -2   4   6   33.63    2.13
  -2   4   5   72.96    3.11
  -2   4   4 1292.86   29.13
  -2   4   4 1272.53   28.65
  -2   4   3  443.27   10.71
  -2   4   3  424.68   10.64
  -2   4   2   49.03    1.96
  -2   4   2   48.59    2.19
  -2   4   1  189.66    4.89
  -2   4   1  172.35    5.01
  -2   4   1  183.81    5.54
  -2   4   0  150.12    4.08
  -2   4   0  150.64    4.96
  -2   4   0  154.21    4.60
  -2   4  -1  109.13    3.10
  -2   4  -1  109.86    3.80
  -2   4  -1  106.20    4.09
  -2   4  -2    2.90    0.36
  -2   4  -2    2.96    0.75
  -2   4  -3  207.46    7.07
  -2   4  -3  234.14    5.96
  -2   4  -4  659.09   16.94
  -2   4  -5  344.97   10.24
  -2   4  -6   14.67    1.59
  -2   4  -7   49.91    3.03
   2  -4   8  174.49    5.47
  -2   4  -8  180.09    6.65
  -2   4  -9  292.69    9.33
   2  -4   9  295.96    8.27
  -2   4 -10  122.96    6.44
   2  -4  10  121.46    4.65
   2  -4  10  130.66    4.57
  -2   4 -11   58.73    4.35
   2  -4  11   57.07    2.83
   2  -4  11   59.33    2.94
   2  -4  12  505.47   13.41
   2  -4  12  527.32   13.45
   2  -4  13  529.06   13.52
   2  -4  13  510.55   13.39
   2  -4  14    1.01    0.61
   2  -4  14    0.48    0.46
   2  -4  15   78.99    3.19
   2  -4  15   78.39    3.23
   2  -4  16   18.68    1.28
   2  -4  17    1.13    0.31
  -2   3  18   19.84    1.28
  -2   3  17   38.78    2.13
   2  -3 -17   37.96    1.96
  -2   3  16    0.32    0.51
   2  -3 -16    0.36    0.37
  -2   3  15  116.40    4.75
  -2   3  14  163.60    6.08
  -2   3  13  156.33    5.93
  -2   3  12    2.98    0.74
  -2   3  12    1.25    0.62
  -2   3  11   14.65    1.80
  -2   3  11   12.47    1.38
  -2   3  10   54.95    2.94
  -2   3  10   63.78    3.57
  -2   3   9   24.79    1.79
  -2   3   9   25.92    2.10
  -2   3   8  531.02   14.30
  -2   3   7    6.31    0.93
  -2   3   6 1362.68   31.49
  -2   3   5  226.06    5.65
  -2   3   5  216.56    6.55
  -2   3   4 1062.97   23.94
  -2   3   4 1079.45   24.55
  -2   3   3  200.28    5.40
  -2   3   3  202.20    5.53
  -2   3   2  248.70    6.26
  -2   3   2  241.64    6.45
  -2   3   1   58.71    1.93
  -2   3   1   62.49    2.43
  -2   3   0   99.38    2.65
  -2   3   0   94.26    3.18
  -2   3   0   97.40    3.43
  -2   3  -1   34.12    1.14
  -2   3  -1   35.29    1.91
  -2   3  -1   33.82    1.75
  -2   3  -2 1308.59   29.55
  -2   3  -2 1287.65   27.98
  -2   3  -2 1245.28   29.27
  -2   3  -3  684.59   15.42
  -2   3  -3  675.08   16.81
  -2   3  -4  228.73    7.02
   2  -3   4  225.04    5.91
  -2   3  -5  104.79    4.27
   2  -3   5  108.63    3.57
  -2   3  -6   71.08    3.40
  -2   3  -7    4.32    0.82
  -2   3  -8  596.19   15.67
  -2   3  -9    9.95    1.24
   2  -3   9   10.88    1.07
   2  -3  10   54.83    2.81
  -2   3 -10   57.76    4.07
   2  -3  10   54.69    2.64
   2  -3  11   33.50    2.17
  -2   3 -11   32.63    3.23
   2  -3  11   35.35    2.11
   2  -3  12    6.52    0.96
   2  -3  12    5.89    0.97
   2  -3  13   98.55    4.02
   2  -3  13  101.13    4.05
   2  -3  14  120.26    4.48
   2  -3  14  119.18    4.49
   2  -3  15   58.50    2.78
   2  -3  15   60.95    2.80
   2  -3  16   30.25    1.77
   2  -3  17  100.01    3.38
  -2   2  18    0.26    0.29
  -2   2  17    6.91    0.91
   2  -2 -17    7.89    0.89
  -2   2  16  249.34    7.70
  -2   2  15   17.61    1.70
  -2   2  14  171.66    6.27
  -2   2  13   31.45    2.33
  -2   2  12   58.18    3.74
  -2   2  12   52.83    3.02
  -2   2  11  208.94    7.73
  -2   2  11  207.42    6.86
  -2   2  10   11.44    1.25
  -2   2  10    9.73    1.37
  -2   2   9   33.20    2.37
  -2   2   8  262.89    8.17
  -2   2   7    3.10    0.67
  -2   2   6    8.41    1.01
  -2   2   5 4037.47   86.74
  -2   2   5 4006.95   87.97
  -2   2   4   75.37    2.44
  -2   2   4   83.48    3.00
  -2   2   3 1071.47   24.04
  -2   2   3 1087.84   24.39
  -2   2   2  249.28    6.45
  -2   2   2  256.52    6.42
  -2   2   1   53.31    2.05
  -2   2   0  283.60    6.47
  -2   2   0  291.70    7.30
  -2   2   0  293.91    7.45
  -2   2  -1 2799.12   60.75
  -2   2  -1 2748.50   60.61
  -2   2  -2  680.03   15.10
  -2   2  -2  724.75   16.57
   2  -2   3  256.09    6.13
  -2   2  -3  283.92    7.44
  -2   2  -4    7.23    0.89
   2  -2   4    7.37    0.58
  -2   2  -5  196.99    6.13
   2  -2   5  193.88    5.33
  -2   2  -6   71.68    3.15
   2  -2   6   63.15    2.58
  -2   2  -7  243.97    7.41
  -2   2  -8  108.63    4.25
  -2   2  -9   27.76    2.60
   2  -2   9   28.26    1.68
   2  -2  10    5.10    0.78
   2  -2  10    5.54    0.95
  -2   2 -10    5.61    1.32
  -2   2 -11   70.04    4.60
   2  -2  11   72.39    3.30
   2  -2  11   71.91    3.16
   2  -2  12   33.83    2.09
   2  -2  12   33.12    2.14
  -2   2 -12   29.08    2.92
   2  -2  13  123.25    4.65
   2  -2  13  128.33    4.76
   2  -2  14   18.72    1.61
   2  -2  14   23.17    1.73
   2  -2  15    1.26    0.55
   2  -2  16   46.58    2.35
   2  -2  17  136.63    4.40
   2  -2  18   27.29    1.39
  -2   1  18    6.43    0.75
  -2   1  17   35.88    2.07
  -2   1  16  139.13    5.10
  -2   1  15  104.10    4.41
  -2   1  14  128.90    5.17
  -2   1  13   71.67    3.63
  -2   1  13   80.26    3.49
  -2   1  12   13.65    1.72
  -2   1  12   12.01    1.37
  -2   1  11   38.66    2.88
  -2   1  11   37.49    2.36
  -2   1  10   64.77    3.12
  -2   1  10   74.77    3.91
  -2   1   9    2.67    0.75
  -2   1   8    0.05    0.41
  -2   1   7  312.26    8.96
  -2   1   6  321.96    8.89
  -2   1   5  675.31   16.28
  -2   1   4    0.69    0.22
  -2   1   4    0.94    0.35
  -2   1   3  165.82    4.45
  -2   1   3  175.60    4.83
  -2   1   2 1829.56   41.02
  -2   1   2 1924.59   41.05
  -2   1   1  390.51    9.16
  -2   1   1  372.73    8.76
  -2   1   0  446.84   10.80
  -2   1   0  456.02   10.01
  -2   1  -1 4828.06  105.46
  -2   1  -1 4936.88  105.45
  -2   1  -2 6142.30  131.96
  -2   1  -2 6093.91  132.08
  -2   1  -3   10.32    0.98
  -2   1  -3   12.21    1.00
   2  -1   3   11.66    0.52
  -2   1  -4 1372.79   30.62
  -2   1  -4 1378.91   31.08
   2  -1   4 1335.98   29.61
   2  -1   5   91.37    2.92
  -2   1  -5  100.53    3.52
  -2   1  -6 1114.64   23.98
   2  -1   6  968.62   23.20
   2  -1   7   64.06    2.69
  -2   1  -7   67.54    2.89
  -2   1  -8    0.17    0.28
   2  -1   8    1.43    0.46
  -2   1  -9  140.34    6.11
   2  -1  10   69.47    3.17
  -2   1 -10   70.12    4.23
   2  -1  10   74.49    3.08
  -2   1 -11    9.51    1.66
   2  -1  11   10.62    1.12
   2  -1  11   10.60    1.22
   2  -1  12  160.58    5.48
  -2   1 -12  147.51    7.09
   2  -1  12  165.99    5.58
   2  -1  13    8.13    1.07
   2  -1  13    7.69    1.04
   2  -1  14    0.12    0.49
   2  -1  14   -0.33    0.64
   2  -1  15    3.59    0.79
   2  -1  16  107.09    4.02
   2  -1  17    3.10    0.59
   2  -1  18  100.91    3.35
  -2   0  18    0.66    0.30
  -2   0  17   76.83    3.22
  -2   0  16   32.93    2.14
  -2   0  16   31.70    1.86
  -2   0  15  226.81    6.91
  -2   0  15  226.50    7.35
  -2   0  14    0.33    0.54
  -2   0  14    0.80    0.39
  -2   0  13    0.34    0.48
  -2   0  13    0.55    0.52
  -2   0  12    1.20    0.47
  -2   0  12    1.10    0.46
  -2   0  11    0.58    0.42
  -2   0  11    0.08    0.51
  -2   0  10  403.80   11.81
  -2   0  10  381.64   10.55
  -2   0   9  158.92    6.02
  -2   0   8   11.10    1.31
  -2   0   7  210.09    6.70
  -2   0   6  281.38    8.04
  -2   0   5   33.70    1.89
  -2   0   4   99.15    3.42
  -2   0   3  311.62    7.99
  -2   0   3  325.40    7.70
  -2   0   2  365.65    8.59
  -2   0   2  353.05    8.57
  -2   0   1 1775.91   37.87
  -2   0   1 1698.83   38.20
  -2   0   0   83.18    2.60
  -2   0   0   78.91    2.04
  -2   0  -1   21.78    1.13
   2   0   1   19.27    0.59
  -2   0  -1   19.69    1.13
   2   0   2  274.43    5.70
  -2   0  -2  287.55    6.60
  -2   0  -3  389.68    9.80
   2   0   3  380.35    8.66
  -2   0  -3  389.24    9.49
   2   0   4   95.33    2.61
  -2   0  -4   86.72    3.34
  -2   0  -5 1390.11   32.39
   2   0   5 1440.87   31.23
  -2   0  -5 1384.26   31.70
  -2   0  -6  624.28   16.23
   2   0   6  649.61   15.07
  -2   0  -6  643.19   15.34
  -2   0  -7   13.86    1.48
   2   0   7   14.64    1.11
  -2   0  -7   14.48    1.13
   2   0   8  431.55   10.88
  -2   0  -8  390.00   11.90
  -2   0  -9  671.92   18.95
   2   0   9  743.34   17.71
   2   0  10  169.00    5.45
  -2   0 -10  158.31    6.76
   2   0  10  167.85    5.35
   2   0  11  394.45   10.56
  -2   0 -11  376.56   12.48
   2   0  11  397.88   10.61
  -2   0 -12    9.85    1.65
   2   0  12    8.40    1.05
   2   0  12    8.49    1.10
   2   0  13   56.77    2.89
   2   0  13   55.41    2.87
   2   0  14    1.52    0.63
   2   0  15    4.79    0.86
   2   0  16   10.20    1.14
   2   0  17   12.17    1.11
   2   0  18    1.68    0.44
  -2  -1  18    0.10    0.30
  -2  -1  17   11.19    1.10
  -2  -1  17    9.43    0.89
  -2  -1  16   97.51    3.91
  -2  -1  16   90.88    3.58
  -2  -1  15    0.41    0.45
  -2  -1  15    0.02    0.37
  -2  -1  14   40.93    2.55
  -2  -1  14   39.84    2.43
  -2  -1  13    0.34    0.46
  -2  -1  12    0.59    0.41
  -2  -1  12   -0.22    0.37
  -2  -1  11    9.80    1.13
  -2  -1  11    9.92    1.51
  -2  -1  11    9.30    0.89
  -2  -1  10  351.96   10.86
  -2  -1  10  336.54    9.46
  -2  -1   9   85.78    4.16
  -2  -1   8  763.55   19.32
  -2  -1   7   61.83    3.08
  -2  -1   6 1784.14   40.44
  -2  -1   5  399.67   10.42
  -2  -1   4 2157.22   47.69
  -2  -1   3    0.79    0.32
  -2  -1   2  751.29   16.87
  -2  -1   2  739.30   16.92
  -2  -1   1 3995.49   85.78
  -2  -1   1 3971.74   85.98
  -2  -1   0 1728.62   37.64
  -2  -1   0 1743.21   38.01
  -2  -1  -1  387.66    9.40
   2   1   1  397.95    9.09
  -2  -1  -2  692.44   15.33
   2   1   2  650.64   14.84
   2   1   3  781.25   17.82
  -2  -1  -3  815.49   18.29
  -2  -1  -3  820.53   18.66
  -2  -1  -4   69.43    2.76
  -2  -1  -4   65.34    2.39
   2   1   4   64.21    2.19
  -2  -1  -5  657.49   15.57
   2   1   5  649.07   14.60
  -2  -1  -6   18.80    1.19
   2   1   6   21.33    1.27
  -2  -1  -6   20.38    1.60
  -2  -1  -7   32.89    1.62
   2   1   7   33.49    1.79
  -2  -1  -8   10.12    1.30
   2   1   8    8.69    0.93
   2   1   9 1183.56   26.83
  -2  -1  -9 1077.43   27.91
  -2  -1 -10  426.05   13.15
   2   1  10  457.77   12.13
   2   1  10  456.43   11.60
   2   1  10  435.53   11.56
   2   1  11  623.25   15.79
   2   1  11  647.53   15.77
  -2  -1 -11  617.35   17.64
   2   1  12   50.10    2.69
   2   1  12   52.52    2.69
   2   1  13   85.97    3.69
   2   1  14   85.94    3.68
   2   1  15    9.55    1.15
   2   1  16   12.36    1.21
   2   1  17    3.12    0.59
   2   1  18   10.52    0.93
  -2  -2  18   83.02    2.84
  -2  -2  17   89.33    3.28
  -2  -2  17   97.01    3.51
  -2  -2  16   77.03    3.28
  -2  -2  16   69.99    3.07
  -2  -2  15   71.01    3.31
  -2  -2  15   64.47    3.13
  -2  -2  14    3.99    0.84
  -2  -2  14    2.03    0.61
  -2  -2  13   24.84    1.91
  -2  -2  12   98.81    3.82
  -2  -2  12  102.98    4.19
  -2  -2  12  101.84    5.39
  -2  -2  11    3.44    0.66
  -2  -2  11    3.85    0.62
  -2  -2  11    4.13    0.69
  -2  -2  11    4.21    1.01
  -2  -2  10  191.10    6.14
  -2  -2  10  203.79    7.65
  -2  -2  10  193.64    5.63
  -2  -2   9  249.10    8.53
  -2  -2   8  358.75   10.73
  -2  -2   7 2417.42   54.66
  -2  -2   6   29.28    1.97
  -2  -2   5   29.57    1.86
  -2  -2   4   46.91    2.23
  -2  -2   3  912.93   20.99
  -2  -2   2 1405.86   31.25
  -2  -2   1 3453.97   74.74
  -2  -2   0  226.11    5.83
  -2  -2   0  236.49    5.95
   2   2   1 1453.62   32.09
  -2  -2  -1 1453.65   32.09
   2   2   2   42.69    1.67
  -2  -2  -2   42.39    1.71
  -2  -2  -3   65.23    2.28
   2   2   3   65.57    2.29
   2   2   4   60.71    2.25
  -2  -2  -4   62.33    2.54
  -2  -2  -4   63.10    2.24
   2   2   5  144.92    4.29
  -2  -2  -5  135.64    4.05
   2   2   6  536.01   13.20
  -2  -2  -6  544.93   12.71
  -2  -2  -6  549.27   13.81
   2   2   6  537.25   13.06
   2   2   7  435.91   11.03
  -2  -2  -7  427.59   11.68
  -2  -2  -8  333.41   10.07
   2   2   8  358.80    9.54
   2   2   9   78.08    3.41
  -2  -2  -9   74.16    3.82
  -2  -2 -10  475.54   13.95
   2   2  10  461.49   12.53
   2   2  10  502.33   13.22
   2   2  11   33.26    2.34
   2   2  11   34.48    2.04
   2   2  12  213.52    6.61
   2   2  13    4.00    0.80
   2   2  14   93.82    3.90
   2   2  15    5.71    0.91
   2   2  16   10.92    1.16
   2   2  17   22.50    1.54
   2   2  18   16.53    1.16
  -2  -3  17  127.22    4.11
  -2  -3  17  127.25    4.12
  -2  -3  16   93.49    3.58
  -2  -3  16   87.08    3.51
  -2  -3  15    3.94    0.75
  -2  -3  15    3.43    0.74
  -2  -3  14   33.78    2.19
  -2  -3  13    2.03    0.63
  -2  -3  12    0.68    0.45
  -2  -3  12    1.06    0.40
  -2  -3  12    1.09    0.43
  -2  -3  11   27.97    1.75
  -2  -3  11   32.54    2.86
  -2  -3  11   26.95    1.88
  -2  -3  11   28.19    1.64
  -2  -3  10  278.98    7.58
  -2  -3  10  265.99    7.87
  -2  -3  10  273.56    7.39
  -2  -3  10  271.71    9.67
  -2  -3   9  234.93    8.40
  -2  -3   8 1169.61   28.70
  -2  -3   7  134.75    5.40
  -2  -3   6  102.30    4.27
  -2  -3   5  178.98    5.91
  -2  -3   4   24.07    1.64
  -2  -3   3  511.82   12.66
  -2  -3   2 3034.77   66.34
  -2  -3   1  861.81   19.80
   2   3   0 1083.43   24.54
  -2  -3   0 1083.73   24.44
   2   3   1  407.41   10.07
   2   3   2 1059.92   24.03
   2   3   3   76.24    2.76
  -2  -3  -4  136.52    4.01
   2   3   4  142.49    4.34
   2   3   5   91.84    3.29
   2   3   6   87.66    3.31
   2   3   7   67.29    2.98
  -2  -3  -8   48.08    2.70
   2   3   8   52.98    2.65
  -2  -3  -9  367.10   10.95
   2   3   9  406.15   10.91
   2   3  10   13.05    1.18
   2   3  10   11.59    1.36
   2   3  11  483.18   12.36
  -2  -3 -11  480.50   12.14
   2   3  11  473.02   13.33
   2   3  12   16.90    1.74
   2   3  12   14.96    1.32
   2   3  13  110.90    4.28
   2   3  14   19.43    1.64
   2   3  15    0.61    0.41
   2   3  16   20.87    1.58
   2   3  17   98.04    3.63
   2   3  18   17.48    1.18
  -2  -4  17   72.84    2.60
  -2  -4  17   76.69    2.84
  -2  -4  16   34.99    1.87
  -2  -4  16   30.43    1.86
  -2  -4  15   15.37    1.45
  -2  -4  15   16.81    1.37
  -2  -4  14    5.62    0.94
  -2  -4  14    5.53    0.87
  -2  -4  13   21.49    1.54
  -2  -4  13   22.16    1.70
  -2  -4  12  199.47    6.52
  -2  -4  12  209.56    6.30
  -2  -4  12  208.37    6.04
  -2  -4  11   36.53    2.20
  -2  -4  11   41.37    2.16
  -2  -4  11   36.67    1.92
  -2  -4  11   34.59    3.11
  -2  -4  10  137.42    4.80
  -2  -4  10  138.46    6.46
  -2  -4  10  140.39    4.56
  -2  -4  10  136.28    4.42
  -2  -4   9  806.95   21.68
  -2  -4   9  803.64   18.82
  -2  -4   8    3.28    0.97
  -2  -4   7 1020.66   25.51
  -2  -4   6    9.40    1.24
  -2  -4   5   36.82    2.36
  -2  -4   4   24.17    1.78
  -2  -4   3  147.52    4.98
  -2  -4   2  584.50   14.40
  -2  -4   1    6.07    0.74
   2   4   0  382.36    9.99
  -2  -4   0  394.35    9.92
   2   4   1 1764.51   39.50
   2   4   2  176.55    5.32
   2   4   3  808.28   19.07
   2   4   4  126.71    4.29
   2   4   5   86.99    3.38
   2   4   6   15.50    1.30
   2   4   7   73.58    3.29
   2   4   8  917.34   22.34
   2   4   9    3.51    0.79
   2   4  10  534.43   13.20
   2   4  10  497.72   14.25
  -2  -4 -10  531.68   13.22
  -2  -4 -11   -0.21    0.37
   2   4  11    0.43    0.44
   2   4  11    0.43    0.60
   2   4  12    9.32    1.07
   2   4  12   10.11    1.40
  -2  -4 -12    8.31    0.96
   2   4  13   62.34    2.98
   2   4  14    1.57    0.53
   2   4  15   62.61    2.97
   2   4  16   86.32    3.50
   2   4  17   30.27    1.74
   2   4  18   87.59    3.03
  -2  -4 -18   94.99    3.38
  -2  -5  17    5.84    0.68
  -2  -5  16    0.35    0.32
  -2  -5  15   26.13    1.60
  -2  -5  15   23.42    1.73
  -2  -5  14    0.39    0.40
  -2  -5  14    1.07    0.59
  -2  -5  13    5.05    0.73
  -2  -5  13    4.59    0.79
  -2  -5  12  253.05    7.20
  -2  -5  12  243.97    6.91
  -2  -5  12  243.65    7.39
  -2  -5  11   80.34    5.06
  -2  -5  11   76.16    3.32
  -2  -5  11   75.68    3.13
  -2  -5  11   79.40    3.07
  -2  -5  10  530.74   16.41
  -2  -5  10  534.78   13.23
  -2  -5  10  525.03   13.08
  -2  -5   9   14.12    2.07
  -2  -5   9   14.06    1.15
  -2  -5   9   14.99    1.17
  -2  -5   8  284.38   10.00
  -2  -5   7    0.49    0.60
  -2  -5   6   67.12    3.75
  -2  -5   5    7.53    1.17
  -2  -5   4   84.36    3.86
  -2  -5   3 1607.67   37.03
  -2  -5   2 1502.62   34.47
   2   5  -1 2922.92   65.42
  -2  -5   1 2987.57   65.31
   2   5   0 1020.71   24.04
   2   5   1  270.12    7.77
   2   5   2  119.31    4.28
   2   5   3  147.54    4.95
   2   5   4    6.08    0.84
   2   5   5   76.14    3.31
   2   5   6  372.45   10.29
   2   5   7  752.98   18.85
   2   5   8  385.37   11.05
   2   5   9  727.21   19.26
  -2  -5  -9  762.31   18.15
   2   5   9  743.82   19.16
   2   5  10    1.03    0.67
  -2  -5 -10    1.21    0.50
   2   5  11   27.54    1.80
   2   5  11   26.35    2.33
  -2  -5 -11   25.24    1.77
   2   5  12   14.45    1.33
   2   5  12   14.30    1.75
  -2  -5 -12   15.26    1.37
   2   5  13   54.17    2.76
  -2  -5 -13   54.42    2.67
   2   5  14  297.91    8.61
   2   5  15   44.49    2.18
   2   5  15   39.69    2.26
   2   5  16   93.01    3.56
   2   5  17   74.42    2.87
  -2  -5 -17   75.67    3.26
  -2  -5 -18  158.20    4.84
  -2  -6  16    0.99    0.39
  -2  -6  15    7.03    0.90
  -2  -6  14   81.06    3.58
  -2  -6  13    1.65    0.46
  -2  -6  12   14.29    1.24
  -2  -6  12   13.19    1.12
  -2  -6  11  288.31    7.93
  -2  -6  11  274.24    7.73
  -2  -6  10   23.23    2.68
  -2  -6  10   22.07    1.51
  -2  -6  10   26.52    1.66
  -2  -6   9  311.52    8.29
  -2  -6   9  286.08   11.00
  -2  -6   9  301.33    8.26
  -2  -6   8  314.73   11.34
  -2  -6   8  329.27    8.67
  -2  -6   7  191.95    8.03
  -2  -6   7  218.80    6.17
  -2  -6   6   57.50    3.70
  -2  -6   5   49.69    3.23
  -2  -6   4    1.91    0.65
  -2  -6   3  804.82   20.23
  -2  -6   2 3412.01   75.08
   2   6  -2 3347.14   75.22
   2   6  -1  555.79   14.55
   2   6   0  401.33   11.07
   2   6   1   29.46    2.00
   2   6   2  352.21    9.87
   2   6   3  192.27    6.29
   2   6   4  173.35    5.92
   2   6   5   23.24    1.83
   2   6   6  149.31    5.51
   2   6   7  246.70    8.00
   2   6   8 1184.19   28.75
   2   6   9   19.72    2.01
  -2  -6  -9   20.08    1.58
  -2  -6 -10   81.13    3.52
   2   6  10   75.80    4.15
   2   6  11    6.71    1.21
  -2  -6 -11    4.66    0.81
   2   6  12    1.18    0.68
  -2  -6 -12    2.67    0.67
  -2  -6 -13  183.02    5.97
   2   6  14   30.72    1.91
   2   6  14   30.31    1.95
  -2  -6 -14   29.42    1.83
   2   6  15    0.04    0.33
   2   6  15    0.77    0.35
  -2  -6 -16  105.51    4.29
  -2  -6 -17   35.00    2.02
  -2  -6 -18   37.84    1.81
  -2  -7  16    2.63    0.46
  -2  -7  15    0.04    0.32
  -2  -7  14   38.05    2.21
  -2  -7  13   48.10    2.24
  -2  -7  13   48.19    2.69
  -2  -7  12  105.22    3.74
  -2  -7  12   99.82    3.58
  -2  -7  11   90.15    3.47
  -2  -7  11   88.45    3.39
  -2  -7  10  675.10   16.30
  -2  -7  10  658.88   16.21
  -2  -7   9  107.36    6.16
  -2  -7   9  118.88    4.10
  -2  -7   9  112.46    4.07
  -2  -7   8    1.62    0.71
  -2  -7   8    1.08    0.43
  -2  -7   8    1.67    0.45
  -2  -7   7   33.02    1.80
  -2  -7   7   30.61    2.94
  -2  -7   7   31.61    1.74
  -2  -7   7   32.21    1.86
  -2  -7   6   15.78    1.21
  -2  -7   6   14.60    1.13
  -2  -7   6   16.30    2.07
  -2  -7   5  261.48    9.28
  -2  -7   4   53.58    3.40
   2   7  -3  297.06    9.60
  -2  -7   3  292.70    9.44
   2   7  -2   37.04    2.63
   2   7  -1  502.57   13.87
   2   7   0    0.66    0.41
   2   7   1   16.89    1.61
   2   7   2  300.18    9.07
   2   7   3 1321.93   31.28
   2   7   4    4.11    0.90
   2   7   5  621.01   16.40
   2   7   6    9.10    1.26
  -2  -7  -7 1144.08   27.79
   2   7   7 1274.14   29.22
  -2  -7  -8   37.66    2.42
  -2  -7  -8   38.35    2.32
   2   7   8   41.83    2.92
   2   7   9  772.53   20.26
  -2  -7  -9  751.37   18.86
   2   7  10  250.95    8.98
  -2  -7 -10  248.41    7.71
   2   7  10  242.77    8.76
   2   7  11  276.32    9.74
  -2  -7 -11  272.52    8.32
  -2  -7 -12   90.83    3.89
  -2  -7 -13   14.78    1.39
   2   7  13   15.42    1.43
  -2  -7 -13   15.91    1.80
  -2  -7 -14    9.50    1.37
   2   7  14    8.89    1.02
   2   7  15   75.81    3.02
  -2  -7 -15   77.56    3.75
  -2  -7 -16   14.69    1.39
  -2  -7 -17   18.18    1.36
  -2  -7 -18  101.71    3.25
  -2  -8  15   11.73    0.98
  -2  -8  14  107.63    3.87
  -2  -8  13   41.53    2.34
  -2  -8  12  402.36   11.12
  -2  -8  12  415.07   10.34
  -2  -8  12  390.13   10.15
  -2  -8  11  110.85    3.88
  -2  -8  11  102.50    3.77
  -2  -8  10   82.73    3.29
  -2  -8  10   81.96    3.30
  -2  -8   9  364.39    9.75
  -2  -8   8   84.66    3.20
  -2  -8   8   83.06    3.29
  -2  -8   7    0.75    0.47
  -2  -8   7    0.44    0.32
  -2  -8   7    1.71    0.89
  -2  -8   7    0.29    0.32
  -2  -8   6   75.97    2.97
  -2  -8   6   68.29    2.85
  -2  -8   6   65.77    4.45
  -2  -8   6   71.28    2.96
  -2  -8   5  120.25    4.01
  -2  -8   5  115.03    5.82
  -2  -8   5  119.34    4.02
   2   8  -5  109.86    5.80
  -2  -8   5  119.50    4.03
   2   8  -4  272.23   10.03
  -2  -8   4  296.53    7.83
   2   8  -3    2.47    0.89
   2   8  -2  224.52    8.17
   2   8  -1   31.75    2.54
   2   8   0  241.08    8.27
   2   8   1  540.64   14.88
   2   8   2  230.95    7.84
   2   8   3   36.10    2.54
   2   8   4  169.77    6.40
   2   8   5  172.65    6.57
  -2  -8  -6  807.01   19.76
   2   8   6  825.87   21.01
   2   8   6  842.75   19.50
  -2  -8  -6  766.78   19.65
   2   8   7  117.63    5.25
   2   8   7  113.88    4.23
  -2  -8  -7  106.65    4.37
  -2  -8  -7  112.20    4.48
   2   8   8  560.42   15.36
  -2  -8  -8  517.57   13.94
  -2  -8  -8  538.99   14.22
   2   8   8  504.11   13.58
  -2  -8  -9  185.80    6.34
  -2  -8  -9  175.05    6.47
   2   8   9  192.19    7.51
   2   8   9  165.55    5.91
   2   8  10   51.49    3.58
   2   8  10   56.92    3.70
  -2  -8 -10   48.32    3.11
  -2  -8 -10   55.92    3.04
   2   8  10   49.96    2.80
  -2  -8 -11   29.51    2.13
  -2  -8 -11   24.03    2.20
   2   8  11   27.98    2.03
   2   8  12   -0.16    0.47
  -2  -8 -12   -0.54    0.60
  -2  -8 -12    0.06    0.54
  -2  -8 -13    5.33    1.10
   2   8  13    6.58    0.93
  -2  -8 -14  193.59    6.89
   2   8  14  195.32    6.04
   2   8  15   16.06    1.21
  -2  -8 -15   15.74    1.55
  -2  -8 -16   61.22    2.87
   2   8  16   60.83    2.24
  -2  -8 -17    4.47    0.63
  -2  -9  14    5.86    0.69
  -2  -9  13   92.69    3.52
  -2  -9  12   24.51    1.74
  -2  -9  12   24.90    1.42
  -2  -9  11  113.18    4.48
  -2  -9  11  113.24    3.94
  -2  -9  11  123.37    4.04
  -2  -9  10   38.02    2.08
  -2  -9  10   39.65    2.08
  -2  -9  10   40.28    2.47
  -2  -9   9  180.95    5.59
  -2  -9   9  167.97    6.06
  -2  -9   8   21.87    1.55
  -2  -9   8   24.24    1.58
  -2  -9   7   37.42    2.05
  -2  -9   7   38.65    2.18
  -2  -9   7   36.43    2.04
  -2  -9   6    3.77    0.64
  -2  -9   6    5.16    0.80
   2   9  -6    3.07    1.20
  -2  -9   6    5.05    0.76
   2   9  -5   62.62    4.53
  -2  -9   5   64.15    2.79
  -2  -9   5   69.32    2.89
  -2  -9   5   65.84    2.85
   2   9  -4  167.30    7.62
  -2  -9   4  181.51    5.42
  -2  -9   4  170.18    5.34
   2   9  -3 1098.87   29.19
  -2  -9   3 1162.26   26.06
  -2  -9   3 1117.89   26.04
  -2  -9   2   56.91    2.44
  -2  -9   2   52.51    2.41
   2   9  -2   56.76    3.78
   2   9  -1   93.54    4.87
  -2  -9   1   94.36    3.40
   2   9   0   84.08    4.47
   2   9   1    9.15    1.58
   2   9   2   83.11    4.32
   2   9   3   53.45    3.41
   2   9   3   61.17    2.60
   2   9   4   85.95    4.46
  -2  -9  -4   94.83    3.73
  -2  -9  -4   84.68    3.52
   2   9   4   89.77    3.43
   2   9   5  104.42    5.02
   2   9   5  100.66    3.84
  -2  -9  -5  103.40    4.06
  -2  -9  -5  103.45    4.13
   2   9   6  464.16   13.64
  -2  -9  -6  450.09   12.32
  -2  -9  -6  451.72   12.42
   2   9   6  471.55   12.10
   2   9   7  203.72    7.71
  -2  -9  -7  188.13    6.62
   2   9   7  199.99    6.41
  -2  -9  -7  200.17    6.70
  -2  -9  -8  435.88   12.17
  -2  -9  -8  419.01   12.01
   2   9   8  408.63   11.56
   2   9   9   45.98    3.35
  -2  -9  -9   43.10    2.84
  -2  -9  -9   45.71    2.81
   2   9   9   40.75    2.50
   2   9  10   54.81    2.97
  -2  -9 -10   57.53    3.18
  -2  -9 -10   53.25    3.26
  -2  -9 -11    4.14    1.10
   2   9  11    4.70    0.91
   2   9  12  230.28    7.06
  -2  -9 -12  203.37    7.56
  -2  -9 -13   54.20    3.25
   2   9  13   62.91    2.93
  -2  -9 -14   55.71    3.11
   2   9  14   61.34    2.71
  -2  -9 -15  232.91    7.14
   2   9  15  225.18    6.28
  -2  -9 -16   19.00    1.39
  -2  -9 -17   45.58    1.91
  -2 -10  13    3.18    0.52
  -2 -10  12   73.76    2.96
  -2 -10  11    4.58    0.74
  -2 -10  11    4.28    0.60
  -2 -10  10    1.16    0.41
  -2 -10  10    2.23    0.61
  -2 -10  10    1.76    0.45
  -2 -10   9   27.88    1.94
  -2 -10   9   26.56    1.67
  -2 -10   9   27.33    1.76
  -2 -10   8    8.14    0.95
  -2 -10   8    8.62    0.93
  -2 -10   7  146.17    4.95
  -2 -10   7  148.74    4.90
  -2 -10   6   23.44    1.66
  -2 -10   6   22.86    1.61
  -2 -10   6   23.65    1.63
  -2 -10   5   90.95    3.61
   2  10  -5   89.51    5.72
  -2 -10   5  100.06    3.72
  -2 -10   5   96.13    3.69
  -2 -10   4 1245.17   28.56
  -2 -10   4 1262.08   28.54
   2  10  -3    4.53    1.42
  -2 -10   3    6.83    0.92
  -2 -10   3    5.86    0.82
  -2 -10   2  972.79   22.54
  -2 -10   2  958.50   22.65
   2  10  -2  962.38   25.90
   2  10  -1  253.15    9.46
  -2 -10   1  259.26    7.20
  -2 -10   1  253.51    7.32
  -2 -10   0    5.95    0.81
   2  10   0    5.44    1.18
  -2 -10   0    4.95    0.69
   2  10   1   13.59    1.74
  -2 -10  -1   14.91    1.20
  -2 -10  -1   13.40    1.23
   2  10   2   73.69    4.22
  -2 -10  -2   72.46    2.99
  -2 -10  -2   75.16    3.19
   2  10   3   12.95    1.16
   2  10   3   13.01    1.74
  -2 -10  -3   12.85    1.25
  -2 -10  -4   54.86    2.78
   2  10   4   58.94    2.70
   2  10   4   54.27    3.63
   2  10   5  204.04    7.90
  -2 -10  -5  198.05    6.57
   2  10   5  211.55    6.43
   2  10   6   82.70    3.53
   2  10   6   79.84    4.53
  -2 -10  -6   78.94    3.66
  -2 -10  -7  340.26   10.13
   2  10   7  356.80   11.55
   2  10   7  345.61    9.83
   2  10   8   22.87    2.40
  -2 -10  -8   24.59    2.05
   2  10   8   23.51    1.85
   2  10   9   98.82    4.21
  -2 -10  -9   97.78    4.52
  -2 -10 -10    0.68    0.61
   2  10  10    0.85    0.50
  -2 -10 -11  281.44    9.42
   2  10  11  319.96    9.05
   2  10  12   27.65    1.91
  -2 -10 -12   21.84    2.03
   2  10  13   69.82    3.03
  -2 -10 -13   61.76    3.33
  -2 -10 -14   71.36    3.37
   2  10  14   72.86    2.90
  -2 -10 -15  150.93    5.01
  -2 -10 -16   68.66    2.63
  -2 -11  11   23.60    1.28
  -2 -11  10    5.62    0.69
  -2 -11   9   15.46    1.19
  -2 -11   9   14.23    1.21
  -2 -11   8    7.50    0.82
  -2 -11   8    7.02    0.86
  -2 -11   7    6.42    0.83
  -2 -11   7    8.06    0.94
  -2 -11   6   74.89    3.17
  -2 -11   6   76.79    3.22
  -2 -11   6   74.73    3.18
  -2 -11   5  283.45    8.01
  -2 -11   5  283.28    8.04
  -2 -11   5  281.42    8.09
  -2 -11   4    1.28    0.50
  -2 -11   4    1.04    0.52
  -2 -11   3  236.24    6.77
  -2 -11   3  231.75    6.88
  -2 -11   2  182.51    5.59
  -2 -11   2  181.13    5.76
   2  11  -2  173.97    7.97
  -2 -11   1  200.82    6.02
  -2 -11   1  203.30    6.24
   2  11  -1  187.00    8.20
  -2 -11   0   11.69    1.10
   2  11   0   11.50    1.84
  -2 -11   0   10.77    1.11
   2  11   1    0.63    0.87
  -2 -11  -1    0.54    0.35
  -2 -11  -1    0.65    0.35
  -2 -11  -2    0.36    0.32
  -2 -11  -2    0.31    0.40
   2  11   2   -0.07    0.84
   2  11   3   45.56    3.47
  -2 -11  -3   47.72    2.38
  -2 -11  -3   45.55    2.51
   2  11   4    0.81    0.86
  -2 -11  -4    1.74    0.52
   2  11   4    2.47    0.65
  -2 -11  -4    1.55    0.54
   2  11   5  680.58   19.43
  -2 -11  -5  689.24   17.65
   2  11   5  722.86   17.47
   2  11   6   27.65    1.94
   2  11   6   26.82    2.57
  -2 -11  -6   24.35    1.94
   2  11   7   11.59    1.29
  -2 -11  -7    8.95    1.20
   2  11   8   16.91    1.57
  -2 -11  -8   16.02    1.66
  -2 -11  -9   93.80    4.31
   2  11   9   92.12    4.00
   2  11  10   51.81    2.79
  -2 -11 -10   46.65    2.94
  -2 -11 -11  135.57    5.42
   2  11  11  144.40    5.12
   2  11  12   17.82    1.47
  -2 -11 -12   12.13    1.41
  -2 -11 -13    9.12    1.15
   2  11  13    9.64    1.00
  -2 -11 -14  228.77    6.82
  -2 -11 -15    1.85    0.45
  -2 -12  10    0.75    0.29
  -2 -12   9    0.35    0.30
  -2 -12   8    1.09    0.40
  -2 -12   7   60.53    2.61
  -2 -12   7   55.33    2.47
  -2 -12   6  150.54    4.85
  -2 -12   6  139.61    4.75
  -2 -12   5   47.25    2.39
  -2 -12   5   48.13    2.37
  -2 -12   5   48.88    2.46
  -2 -12   4    4.93    0.77
  -2 -12   4    4.85    0.79
  -2 -12   4    4.70    0.84
  -2 -12   3   52.01    2.55
  -2 -12   3   50.51    2.43
  -2 -12   2  116.47    4.31
  -2 -12   2  121.12    4.18
  -2 -12   1    6.00    0.87
  -2 -12   1    5.52    0.76
  -2 -12   0  107.59    3.87
  -2 -12   0  108.19    4.11
  -2 -12  -1   18.46    1.37
  -2 -12  -1   18.01    1.48
  -2 -12  -2    1.63    0.47
  -2 -12  -2    1.11    0.43
  -2 -12  -3   37.86    2.09
  -2 -12  -3   36.68    2.25
  -2 -12  -4  348.44    9.42
  -2 -12  -4  340.87    9.79
  -2 -12  -5   64.73    3.23
  -2 -12  -5   66.50    2.99
  -2 -12  -6  297.31    8.43
  -2 -12  -6  294.45    8.92
  -2 -12  -7    1.99    0.72
  -2 -12  -8   10.57    1.31
  -2 -12  -9   12.80    1.43
  -2 -12 -10   16.42    1.62
  -2 -12 -11   19.79    1.70
  -2 -12 -12   23.77    1.76
  -2 -12 -13   84.61    3.38
  -2 -12 -14    0.15    0.26
  -2 -13   9   18.50    1.09
  -2 -13   8   11.25    0.94
  -2 -13   7   64.94    2.53
  -2 -13   7   72.58    2.68
  -2 -13   6   10.77    1.00
  -2 -13   6    8.93    0.92
  -2 -13   5  109.22    3.81
  -2 -13   5  101.15    3.76
  -2 -13   4    0.06    0.41
  -2 -13   4    0.89    0.35
  -2 -13   4    0.56    0.37
  -2 -13   3    6.84    0.86
  -2 -13   3    7.87    1.03
  -2 -13   3    7.50    0.88
  -2 -13   2   92.42    3.42
  -2 -13   2   90.95    3.58
  -2 -13   1   14.73    1.20
  -2 -13   1   13.64    1.25
  -2 -13   0    0.20    0.31
  -2 -13   0    0.37    0.38
  -2 -13  -1    2.56    0.64
  -2 -13  -1    3.25    0.61
  -2 -13  -2   87.56    3.31
  -2 -13  -2   82.29    3.56
  -2 -13  -3  116.40    4.03
  -2 -13  -3  111.26    4.35
  -2 -13  -4  224.15    7.03
  -2 -13  -5  197.06    6.47
  -2 -13  -6    0.60    0.47
  -2 -13  -7   51.53    2.79
  -2 -13  -8   81.95    3.68
  -2 -13  -9   13.19    1.33
  -2 -13 -10    8.14    1.05
  -2 -13 -11    1.61    0.50
  -2 -13 -12   14.49    1.19
  -2 -13 -13    1.88    0.41
  -2 -14   8    4.18    0.49
  -2 -14   7   13.66    0.98
  -2 -14   6  321.50    8.13
  -2 -14   5   18.46    1.22
  -2 -14   5   17.77    1.23
  -2 -14   4   16.63    1.26
  -2 -14   4   17.77    1.25
  -2 -14   3    0.64    0.38
  -2 -14   3    0.08    0.35
  -2 -14   2   19.96    1.41
  -2 -14   2   20.00    1.51
  -2 -14   1   62.38    2.73
  -2 -14   0   23.23    1.58
  -2 -14  -1   37.69    2.09
  -2 -14  -2    4.47    0.77
  -2 -14  -3  173.36    5.63
  -2 -14  -4   32.87    2.03
  -2 -14  -5  137.79    4.87
  -2 -14  -6    0.55    0.46
  -2 -14  -7   14.90    1.35
  -2 -14  -8   12.19    1.19
  -2 -14  -9    2.51    0.62
  -2 -14 -10    0.18    0.32
  -2 -14 -11    0.89    0.34
  -2 -14 -12   23.04    1.26
  -2 -15   6   12.55    0.86
  -2 -15   5    8.35    0.69
  -2 -15   4   -0.14    0.28
  -2 -15   4   -0.47    0.32
  -2 -15   3    1.68    0.41
  -2 -15   3    2.15    0.44
  -2 -15   2    1.57    0.41
  -2 -15   2    1.10    0.41
  -2 -15   1   32.58    1.70
  -2 -15   1   29.25    1.75
  -2 -15   0   67.81    2.70
  -2 -15   0   65.93    2.88
  -2 -15  -1    3.15    0.58
  -2 -15  -2  104.52    3.70
  -2 -15  -3   14.14    1.19
  -2 -15  -4  163.02    5.13
  -2 -15  -5    1.62    0.53
  -2 -15  -6   20.78    1.42
  -2 -15  -7   20.55    1.40
  -2 -15  -8   10.32    0.94
  -2 -15  -9   15.68    1.11
  -2 -15 -10   35.78    1.62
  -2 -16   3   -0.06    0.22
  -2 -16   2    4.23    0.53
  -2 -16   1    2.40    0.42
  -2 -16   1    1.89    0.40
  -2 -16   0    0.11    0.23
  -2 -16   0    0.42    0.28
  -2 -16  -1   46.59    2.08
  -2 -16  -1   40.76    1.79
  -2 -16  -2   10.63    0.96
  -2 -16  -2    9.11    0.79
  -2 -16  -3  120.76    3.78
  -2 -16  -3  125.80    4.06
  -2 -16  -4    5.93    0.66
  -2 -16  -4    6.66    0.76
  -2 -16  -5   13.30    0.96
  -2 -16  -5   13.01    0.99
  -2 -16  -6   42.54    1.84
  -2 -16  -6   48.42    1.92
  -3  14   6    0.62    0.29
   3 -14  -6    0.91    0.35
   3 -14  -5   23.57    1.35
  -3  14   5   24.15    1.33
  -3  14   4    4.59    0.59
   3 -14  -4    4.45    0.61
   3 -14  -3    4.57    0.63
  -3  14   3    4.40    0.58
  -3  14   2    6.84    0.72
   3 -14  -2    6.26    0.74
   3 -14  -1   29.31    1.58
  -3  14   1   28.95    1.51
  -3  14   0    4.83    0.60
   3 -14   0    4.84    0.61
  -3  14  -1   34.76    1.58
  -3  14  -1   31.53    1.39
   3 -14   1   34.52    1.67
   3 -14   2   29.05    1.49
   3 -14   3  160.08    4.52
  -3  13   9    1.57    0.37
  -3  13   8   94.05    3.09
   3 -13  -8   84.73    3.10
  -3  13   7   21.17    1.29
   3 -13  -7   20.98    1.40
   3 -13  -6   85.47    3.25
  -3  13   6   80.79    2.92
  -3  13   5   16.92    1.12
   3 -13  -5   17.44    1.35
   3 -13  -4    9.48    1.00
   3 -13  -3   15.65    1.29
  -3  13   3   15.32    1.23
  -3  13   2   -0.13    0.42
   3 -13  -2    0.45    0.38
  -3  13   1    9.21    0.96
   3 -13  -1    9.63    1.02
  -3  13   0   52.73    2.40
   3 -13   0   54.35    2.50
  -3  13  -1   24.56    1.51
   3 -13   1   24.68    1.58
  -3  13  -2  140.26    4.38
   3 -13   2  139.00    4.53
   3 -13   3   73.48    2.87
  -3  13  -3   70.22    2.67
   3 -13   4   11.48    1.00
   3 -13   5    0.19    0.27
   3 -13   6    3.18    0.46
  -3  12  11   13.62    0.96
  -3  12  10    2.95    0.50
   3 -12 -10    3.23    0.55
   3 -12  -9   40.71    2.09
  -3  12   9   44.64    2.12
  -3  12   8   35.83    1.91
   3 -12  -8   31.85    1.91
  -3  12   7   59.32    2.65
   3 -12  -7   60.89    2.85
   3 -12  -6   43.21    2.38
  -3  12   6   43.33    2.20
   3 -12  -5   15.11    1.37
  -3  12   5   15.19    1.23
   3 -12  -4   10.11    1.13
  -3  12   4    8.25    0.88
  -3  12   3    2.25    0.45
   3 -12  -3    3.23    0.71
   3 -12  -2    2.88    0.67
  -3  12   1   19.14    1.49
   3 -12  -1   19.30    1.54
   3 -12   0   32.91    2.03
  -3  12   0   35.12    2.03
  -3  12  -1  189.37    5.98
   3 -12   1  203.53    6.22
   3 -12   2   98.97    3.82
  -3  12  -2   97.27    3.67
   3 -12   3  138.25    4.69
  -3  12  -3  134.84    4.52
  -3  12  -4    0.98    0.42
   3 -12   4    1.29    0.51
   3 -12   5   54.80    2.49
   3 -12   6   19.39    1.33
   3 -12   7   24.86    1.43
   3 -12   8   10.42    0.84
  -3  11  13    3.55    0.44
  -3  11  12    2.91    0.49
  -3  11  11    6.90    0.79
   3 -11 -11    5.21    0.72
   3 -11 -10   22.99    1.60
   3 -11  -9   71.12    3.20
   3 -11  -8   98.70    4.05
   3 -11  -7    8.80    1.13
   3 -11  -6    7.66    1.09
   3 -11  -5    0.29    0.48
  -3  11   4   22.36    1.59
   3 -11  -4   21.04    1.73
  -3  11   3   46.49    2.32
   3 -11  -3   46.87    2.60
   3 -11  -2   12.36    1.30
  -3  11   2   11.48    1.06
   3 -11  -1  155.66    5.43
  -3  11   0   24.69    1.76
   3 -11   0   26.02    1.86
  -3  11  -1   78.47    3.34
   3 -11   1   76.56    3.42
   3 -11   2   28.80    1.94
  -3  11  -2   26.36    1.80
  -3  11  -3  101.05    3.88
   3 -11   3  102.08    4.02
   3 -11   4   43.34    2.36
  -3  11  -4   39.75    2.17
   3 -11   5    6.11    0.87
  -3  11  -5    6.44    0.83
   3 -11   6    3.76    0.68
   3 -11   7    2.03    0.53
   3 -11   8    6.39    0.78
   3 -11   9   77.36    2.82
   3 -11  10   47.91    1.91
  -3  10  13   12.03    0.92
  -3  10  12    1.08    0.39
   3 -10 -12    1.81    0.50
   3 -10 -11   44.23    2.38
   3 -10 -10    6.42    0.96
   3 -10  -9  196.72    6.58
   3 -10  -8  142.60    5.36
   3 -10  -7  137.42    5.26
   3 -10  -6    8.44    1.16
   3 -10  -5   60.87    3.12
   3 -10  -4   30.89    2.11
   3 -10  -3   18.29    1.59
   3 -10  -2  199.03    6.48
  -3  10   2  199.51    6.07
   3 -10  -1    1.17    0.52
   3 -10   0  450.61   12.03
   3 -10   1   39.86    2.33
  -3  10  -1   39.03    2.26
   3 -10   2   99.19    3.96
  -3  10  -2   93.21    3.82
   3 -10   3   13.68    1.35
  -3  10  -3   13.15    1.28
  -3  10  -4    0.95    0.46
   3 -10   4    0.67    0.49
  -3  10  -5    8.71    0.96
  -3  10  -5    8.59    1.01
   3 -10   5    9.09    1.10
   3 -10   6    0.57    0.44
   3 -10   7    0.43    0.42
   3 -10   8  154.03    5.10
   3 -10   9   14.12    1.20
   3 -10  10   81.32    3.01
   3 -10  11    9.15    0.82
  -3   9  14    1.16    0.31
   3  -9 -13   23.25    1.52
  -3   9  13   24.61    1.43
   3  -9 -12   19.44    1.53
   3  -9 -11    1.51    0.53
   3  -9 -10  114.46    4.83
  -3   9  10  140.56    5.03
  -3   9   9  458.48   12.35
   3  -9  -9  432.58   12.33
  -3   9   8  814.60   20.53
   3  -9  -8  824.76   20.57
  -3   9   7   10.61    1.36
   3  -9  -7   11.66    1.37
  -3   9   6   17.20    1.67
   3  -9  -6   16.92    1.60
  -3   9   5   31.45    2.20
   3  -9  -5   30.04    2.10
   3  -9  -4  114.45    4.49
   3  -9  -3   11.63    1.26
   3  -9  -2   29.09    1.96
  -3   9   1  106.51    5.28
   3  -9  -1  111.17    4.24
  -3   9   1  109.93    3.90
  -3   9   0    0.25    0.48
   3  -9   0   -0.17    0.45
  -3   9  -1  347.39   11.78
   3  -9   1  344.50    9.58
   3  -9   2  153.68    5.24
  -3   9  -2  146.42    6.96
  -3   9  -2  152.93    5.15
  -3   9  -3    3.19    0.71
   3  -9   3    2.82    0.69
   3  -9   4  126.57    4.68
  -3   9  -4  128.61    4.63
   3  -9   5    4.87    0.82
  -3   9  -5    6.51    0.94
  -3   9  -6   97.56    3.81
   3  -9   6   95.26    3.92
   3  -9   7   92.09    3.81
   3  -9   8    1.83    0.60
   3  -9   9  305.74    8.58
   3  -9  10    1.46    0.49
   3  -9  11    9.29    0.94
   3  -9  12    4.19    0.57
  -3   8  14    0.20    0.24
   3  -8 -13    1.27    0.46
  -3   8  12   20.40    1.57
   3  -8 -12   17.34    1.57
  -3   8  12   19.88    1.54
  -3   8  11   75.56    3.38
  -3   8  11   70.64    3.21
  -3   8  10   41.93    2.55
  -3   8  10   44.11    2.48
  -3   8   9    1.39    0.66
   3  -8  -9    0.37    0.53
  -3   8   8  357.52   10.53
   3  -8  -8  374.53   10.73
  -3   8   7   41.43    2.58
   3  -8  -7   42.28    2.59
  -3   8   6   23.52    1.89
   3  -8  -6   21.51    1.78
  -3   8   5    2.53    0.72
   3  -8  -5    2.55    0.68
  -3   8   4   45.31    2.56
   3  -8  -4   44.45    2.47
  -3   8   3  110.90    4.33
   3  -8  -3  109.97    4.19
   3  -8  -2  266.14    7.86
  -3   8   2  279.43    9.04
  -3   8   1  705.28   18.99
   3  -8  -1  710.06   17.34
  -3   8   0  177.22    7.12
   3  -8   0  177.32    5.65
  -3   8  -1   24.03    2.64
   3  -8   1   13.08    1.43
   3  -8   2   39.90    2.22
  -3   8  -2   40.57    3.31
  -3   8  -3   19.74    2.27
   3  -8   3   23.03    1.66
  -3   8  -3   22.95    1.63
   3  -8   4    1.00    0.49
  -3   8  -4    0.95    0.45
  -3   8  -4    1.74    0.96
  -3   8  -5  257.00    9.95
  -3   8  -5  244.11    9.86
  -3   8  -5  271.68    7.73
   3  -8   5  265.80    7.80
  -3   8  -6   11.45    1.10
   3  -8   6   10.46    1.16
  -3   8  -6   11.17    1.14
   3  -8   7   59.45    2.95
   3  -8   8  105.02    4.16
   3  -8   9    5.95    0.88
   3  -8  10   75.76    3.25
   3  -8  11   34.31    1.97
   3  -8  12   12.69    1.07
   3  -8  13    5.98    0.67
  -3   7  15   18.77    1.30
  -3   7  14   12.53    0.96
  -3   7  14   12.54    1.18
  -3   7  13    1.30    0.45
  -3   7  13    0.93    0.46
   3  -7 -13    1.44    0.55
  -3   7  12    0.92    0.47
  -3   7  12    0.65    0.46
   3  -7 -12   -0.40    0.60
  -3   7  11  186.99    6.03
  -3   7  11  170.81    5.96
  -3   7  10    0.43    0.53
  -3   7  10    1.68    0.59
   3  -7 -10    1.06    0.62
  -3   7   9  212.53    7.16
  -3   7   9  228.74    8.30
   3  -7  -9  217.83    7.42
  -3   7   9  229.04    7.23
  -3   7   8   81.16    3.75
  -3   7   8   82.50    4.43
   3  -7  -8   83.29    3.89
  -3   7   8   82.53    3.65
  -3   7   7   11.30    1.28
  -3   7   7    7.46    1.22
   3  -7  -7    8.16    1.11
  -3   7   7    9.30    1.07
  -3   7   6   22.93    1.79
  -3   7   6   26.25    2.20
   3  -7  -6   24.13    1.81
  -3   7   6   22.77    1.66
   3  -7  -5    0.66    0.47
  -3   7   5   -0.11    0.42
  -3   7   4  139.34    4.93
   3  -7  -4  140.74    4.87
  -3   7   3  298.39    8.40
   3  -7  -3  282.45    8.19
  -3   7   3  305.17    9.04
  -3   7   2   20.98    1.88
  -3   7   2   23.08    1.64
   3  -7  -2   21.19    1.51
  -3   7   1  704.39   18.45
  -3   7   1  724.62   17.23
   3  -7  -1  684.17   16.94
   3  -7   0   59.72    2.67
  -3   7   0   64.28    3.71
   3  -7   1   18.37    1.36
  -3   7  -1   18.03    2.01
  -3   7  -2   37.95    3.01
   3  -7   2   37.03    2.01
  -3   7  -3   53.73    3.73
  -3   7  -3   53.53    3.51
  -3   7  -3   55.42    2.52
   3  -7   3   51.62    2.48
   3  -7   4   17.70    1.39
  -3   7  -4   17.55    2.10
  -3   7  -4   18.18    1.40
  -3   7  -4   17.62    2.19
  -3   7  -5    1.51    0.46
  -3   7  -5    2.48    0.94
  -3   7  -5    1.10    0.80
   3  -7   5    1.93    0.55
  -3   7  -6  308.09    8.64
  -3   7  -6  325.90    8.53
   3  -7   6  307.03    8.75
  -3   7  -6  293.54   10.76
  -3   7  -6  293.40   11.21
   3  -7   7  333.55    9.33
  -3   7  -7  325.32   11.39
  -3   7  -7  326.66   12.17
   3  -7   8   98.82    3.99
   3  -7   9   53.14    2.72
   3  -7   9   52.91    2.72
   3  -7  10   46.28    2.42
   3  -7  10   49.52    2.59
   3  -7  11    2.50    0.58
   3  -7  11    1.81    0.51
   3  -7  12   48.30    2.17
   3  -7  12   47.86    2.38
   3  -7  13    0.02    0.34
   3  -7  14    2.60    0.50
  -3   6  16   28.37    1.60
  -3   6  15    5.13    0.78
  -3   6  14   15.84    1.47
  -3   6  13    0.71    0.40
  -3   6  13    0.14    0.42
   3  -6 -13   -0.10    0.53
   3  -6 -12   68.21    3.62
  -3   6  12   75.60    3.71
  -3   6  11    3.34    0.77
   3  -6 -11    2.17    0.74
  -3   6  11    3.16    0.84
  -3   6  10   42.87    3.08
   3  -6 -10   35.81    2.55
  -3   6  10   39.19    2.53
  -3   6  10   40.41    2.45
  -3   6   9   22.50    1.80
  -3   6   9   19.93    2.09
   3  -6  -9   20.61    1.85
  -3   6   9   21.86    1.81
  -3   6   8    1.93    0.69
  -3   6   8    1.16    0.49
  -3   6   8    1.35    0.74
   3  -6  -8    1.24    0.53
  -3   6   7    0.86    0.52
  -3   6   7    0.32    0.35
  -3   6   7    0.85    0.52
   3  -6  -7    1.16    0.50
   3  -6  -6    1.98    0.60
  -3   6   6    2.79    0.63
  -3   6   6    2.10    0.67
  -3   6   6    2.08    0.57
  -3   6   5   -0.16    0.38
  -3   6   5    0.58    0.41
  -3   6   4   40.45    2.18
  -3   6   4   40.49    2.38
  -3   6   3    0.49    0.38
  -3   6   2  485.39   13.04
  -3   6   1   83.36    3.87
  -3   6   0  184.71    6.67
  -3   6  -1  223.03    7.77
  -3   6  -1  213.40    7.11
  -3   6  -2   18.64    1.97
  -3   6  -2   19.06    1.80
  -3   6  -3   17.92    1.99
  -3   6  -3   16.16    1.83
  -3   6  -3   16.57    1.22
  -3   6  -4   84.72    4.65
  -3   6  -4   86.97    4.68
  -3   6  -4   90.51    3.33
   3  -6   4   85.38    3.29
   3  -6   5    6.99    0.84
  -3   6  -5    4.98    0.71
  -3   6  -5    5.96    1.28
  -3   6  -5    5.23    1.26
  -3   6  -6  120.85    4.27
  -3   6  -6  124.65    4.17
   3  -6   6  123.97    4.37
  -3   6  -6  127.63    6.03
  -3   6  -6  123.30    6.28
  -3   6  -7  122.27    6.48
   3  -6   7  120.56    4.45
  -3   6  -7  117.39    5.86
  -3   6  -7  133.55    4.30
  -3   6  -8  144.05    6.59
   3  -6   8  145.38    5.10
  -3   6  -8  154.89    7.57
   3  -6   9   69.21    3.18
   3  -6  10    1.38    0.53
   3  -6  10    0.52    0.51
   3  -6  11    6.09    0.95
   3  -6  11    5.37    0.88
   3  -6  12  149.92    5.10
   3  -6  12  152.93    5.00
   3  -6  13  140.75    4.53
   3  -6  13  142.25    4.71
   3  -6  14  168.35    4.91
   3  -6  14  170.99    5.13
   3  -6  15    5.99    0.66
  -3   5  17    4.25    0.58
  -3   5  16   10.66    1.07
  -3   5  15    0.69    0.46
  -3   5  14    3.17    0.61
  -3   5  14    1.34    0.55
  -3   5  13  201.51    7.12
  -3   5  13  215.58    6.55
  -3   5  12  111.65    4.80
  -3   5  12  117.16    4.40
  -3   5  11  200.94    6.97
  -3   5  11  218.41    6.65
  -3   5  10    2.97    0.72
  -3   5  10    4.05    0.82
  -3   5  10    2.29    0.89
   3  -5 -10    1.91    0.66
  -3   5   9    8.57    1.18
  -3   5   9    8.91    1.11
  -3   5   9    7.99    1.32
   3  -5  -9    8.00    1.17
  -3   5   8   45.75    2.56
  -3   5   8   39.14    2.32
  -3   5   8   43.63    2.87
   3  -5  -8   42.02    2.53
  -3   5   7    5.39    0.85
  -3   5   7    4.35    0.77
  -3   5   6   39.51    2.18
  -3   5   6   44.40    2.64
  -3   5   5   40.48    2.40
  -3   5   4   93.67    3.54
  -3   5   4   82.22    3.54
  -3   5   3  947.17   22.56
  -3   5   3  953.66   22.35
  -3   5   2   15.88    1.41
  -3   5   1  424.05   11.53
  -3   5   0   41.46    2.54
  -3   5  -1   86.43    4.05
  -3   5  -1   92.56    3.90
  -3   5  -2   26.12    2.04
  -3   5  -2   28.44    2.27
  -3   5  -3   22.03    2.06
  -3   5  -3   19.94    1.90
  -3   5  -4    0.26    0.54
  -3   5  -4    2.07    0.79
  -3   5  -5   24.84    2.29
  -3   5  -5   26.08    1.55
  -3   5  -5   23.82    2.37
  -3   5  -6   74.61    2.98
  -3   5  -6   77.48    2.93
  -3   5  -6   83.01    4.78
   3  -5   6   72.51    3.01
  -3   5  -6   75.83    4.25
  -3   5  -7  288.50   10.64
  -3   5  -7  294.53    7.77
   3  -5   7  275.07    7.97
  -3   5  -7  276.39    9.68
  -3   5  -8   46.67    3.87
   3  -5   8   49.28    2.50
  -3   5  -8   48.91    3.40
   3  -5   9   56.86    2.76
  -3   5  -9   50.14    3.54
  -3   5  -9   55.83    4.32
   3  -5  10    2.74    0.68
   3  -5  10    2.37    0.73
   3  -5  11   60.87    3.06
   3  -5  11   65.06    3.04
   3  -5  12   10.89    1.21
   3  -5  12   11.61    1.23
   3  -5  13   33.56    1.97
   3  -5  13   32.04    1.97
   3  -5  14   92.08    3.35
   3  -5  14   81.79    3.29
   3  -5  15   32.16    1.62
   3  -5  15   31.10    1.68
  -3   4  17   14.33    1.12
  -3   4  16    4.33    0.76
  -3   4  15  156.15    5.58
  -3   4  14    2.19    0.55
  -3   4  14    1.13    0.57
  -3   4  13  187.99    6.82
  -3   4  13  193.95    6.11
  -3   4  12  450.44   12.80
  -3   4  12  450.52   12.00
  -3   4  11  113.47    4.90
  -3   4  11  117.41    4.51
  -3   4  11  120.52    5.61
  -3   4  10   74.41    3.38
  -3   4  10   74.50    3.67
  -3   4  10   73.20    4.11
  -3   4   9   27.78    2.04
  -3   4   9   26.83    2.30
  -3   4   8    0.97    0.43
  -3   4   8    2.08    0.59
  -3   4   7  135.56    5.31
  -3   4   6    7.51    1.07
  -3   4   5  528.85   13.67
  -3   4   4 1080.61   25.00
  -3   4   4 1084.35   25.28
  -3   4   3  101.27    3.61
  -3   4   3   95.90    3.63
  -3   4   2 1270.46   28.32
  -3   4   2 1228.41   28.88
  -3   4   1   11.95    1.17
  -3   4   1   14.36    0.96
  -3   4   0  141.12    5.00
  -3   4  -1    0.23    0.46
  -3   4  -1    0.64    0.37
  -3   4  -2    7.91    1.11
  -3   4  -2    8.57    1.14
  -3   4  -3  142.43    5.56
  -3   4  -3  150.49    5.65
  -3   4  -4    0.93    0.48
  -3   4  -4    2.04    0.75
  -3   4  -5    0.74    0.61
  -3   4  -5    0.94    0.68
  -3   4  -6  221.36    8.44
  -3   4  -6  225.57    7.88
  -3   4  -7  343.84    8.77
  -3   4  -7  331.64   10.56
   3  -4   7  330.54    8.98
  -3   4  -7  328.82   11.45
  -3   4  -8   54.07    3.41
   3  -4   8   55.24    2.59
  -3   4  -8   54.69    4.06
   3  -4   9   22.52    1.61
  -3   4  -9   20.02    2.06
  -3   4  -9   18.56    2.42
  -3   4 -10   25.68    3.04
   3  -4  10   26.96    1.82
   3  -4  11    9.38    1.22
   3  -4  11   10.85    1.20
   3  -4  12  237.19    7.22
   3  -4  12  238.85    7.41
   3  -4  13  296.91    8.39
   3  -4  13  275.69    8.19
   3  -4  14   66.72    2.95
   3  -4  14   67.61    2.98
   3  -4  15   24.00    1.51
   3  -4  15   20.40    1.42
   3  -4  16    0.14    0.27
  -3   3  18    0.81    0.27
  -3   3  17    0.38    0.32
  -3   3  16   75.38    3.33
  -3   3  15   65.34    3.30
  -3   3  14   50.49    3.00
  -3   3  14   50.23    2.43
  -3   3  13  593.64   15.95
  -3   3  13  591.81   14.91
  -3   3  12  151.57    5.90
  -3   3  11   54.87    3.16
  -3   3  11   58.80    3.73
  -3   3  10  117.33    4.80
  -3   3  10  120.46    5.42
  -3   3   9   71.99    3.46
  -3   3   9   72.99    3.86
  -3   3   8    7.39    1.01
  -3   3   8    8.28    1.19
  -3   3   7  132.35    5.11
  -3   3   6    3.21    0.69
  -3   3   5  228.60    6.27
  -3   3   5  227.65    6.92
  -3   3   4  344.58    9.02
  -3   3   4  357.29    9.40
  -3   3   3  687.60   16.55
  -3   3   3  700.30   16.51
  -3   3   2  154.26    4.90
  -3   3   2  154.58    4.51
  -3   3   1   26.30    1.66
  -3   3   1   26.49    1.25
  -3   3   0   98.47    3.75
  -3   3  -1  219.49    6.77
  -3   3  -1  224.56    6.72
  -3   3  -2  448.31   11.92
  -3   3  -2  442.68   11.85
  -3   3  -3  265.42    8.24
  -3   3  -3  286.86    8.51
  -3   3  -4  126.72    5.01
  -3   3  -4  133.60    5.30
  -3   3  -5  872.93   22.14
  -3   3  -5  852.65   21.45
  -3   3  -6  324.55    9.90
  -3   3  -6  327.30   10.61
  -3   3  -7  266.15    8.68
  -3   3  -7  271.33    9.67
   3  -3   8    1.46    0.45
  -3   3  -8    0.12    0.44
  -3   3  -8    0.08    0.62
  -3   3  -9   45.35    2.95
   3  -3   9   48.34    2.39
  -3   3  -9   48.77    3.83
   3  -3  10   72.24    3.13
  -3   3 -10   63.47    4.63
   3  -3  11  150.29    5.57
   3  -3  11  157.06    5.29
   3  -3  12    5.84    1.02
   3  -3  12    5.34    0.87
   3  -3  13   19.43    1.58
   3  -3  13   19.28    1.65
   3  -3  14  103.82    3.96
   3  -3  14   94.53    3.80
   3  -3  15    7.16    0.91
   3  -3  16   13.76    1.10
   3  -3  17   12.32    0.91
  -3   2  18   22.71    1.30
  -3   2  17    2.09    0.51
  -3   2  16   70.82    3.25
  -3   2  15    3.50    0.84
  -3   2  14  397.18   11.53
  -3   2  14  402.02   10.52
  -3   2  13   42.93    2.84
  -3   2  12  464.97   14.42
  -3   2  12  489.33   13.46
  -3   2  11   10.42    1.35
  -3   2  11   11.89    1.72
  -3   2  10   24.26    1.95
  -3   2  10   27.92    2.41
  -3   2   9  574.52   15.20
  -3   2   9  612.86   16.18
  -3   2   8  253.90    8.20
  -3   2   7  714.44   18.06
  -3   2   6  699.04   17.39
  -3   2   5  505.50   12.93
  -3   2   5  508.51   12.19
  -3   2   4  829.70   19.39
  -3   2   4  850.64   19.79
  -3   2   3  123.18    3.96
  -3   2   3  125.02    4.00
  -3   2   2  164.12    4.97
  -3   2   2  164.23    4.59
  -3   2   1  295.99    7.99
  -3   2   1  296.79    7.12
  -3   2   0    4.97    0.70
  -3   2   0    2.89    0.23
  -3   2  -1   83.26    3.30
  -3   2  -1   85.61    3.37
  -3   2  -2  947.66   21.95
  -3   2  -2  897.08   21.91
  -3   2  -3 2026.67   45.36
  -3   2  -3 1991.66   45.56
  -3   2  -4  336.18    9.69
  -3   2  -4  357.32   10.20
  -3   2  -5  808.99   20.28
  -3   2  -5  842.91   21.04
  -3   2  -6  322.59   10.48
  -3   2  -6  343.08    9.87
  -3   2  -7    6.29    1.01
  -3   2  -7    6.19    1.22
  -3   2  -8   13.66    1.86
  -3   2  -8   12.05    1.34
   3  -2   8   12.10    1.06
  -3   2  -9   55.37    3.99
   3  -2   9   57.77    2.62
   3  -2  10    7.98    0.97
  -3   2 -10    8.26    1.76
   3  -2  11    5.36    1.04
  -3   2 -11    3.59    1.11
   3  -2  11    3.18    0.70
   3  -2  12   28.82    2.08
   3  -2  12   24.90    1.83
   3  -2  13  109.19    4.34
   3  -2  13  107.43    4.21
   3  -2  14   15.87    1.42
   3  -2  14   19.12    1.57
   3  -2  15   27.45    1.80
   3  -2  16    3.92    0.67
   3  -2  17    2.51    0.50
  -3   1  18    2.86    0.48
  -3   1  17    7.44    0.87
  -3   1  16   55.62    2.81
  -3   1  15  178.37    6.25
  -3   1  14   71.63    3.65
  -3   1  13  498.22   13.78
  -3   1  12   69.45    3.60
  -3   1  12   67.95    3.26
  -3   1  12   73.70    4.40
  -3   1  11   76.48    3.72
  -3   1  11   75.74    4.38
  -3   1  11   76.60    3.45
  -3   1  10   24.13    1.89
  -3   1  10   22.89    1.71
  -3   1  10   28.52    2.41
  -3   1   9   14.17    1.38
  -3   1   9   17.34    1.80
  -3   1   8   20.93    1.86
  -3   1   7 1054.01   25.39
  -3   1   6  104.69    4.13
  -3   1   5 1210.80   27.79
  -3   1   5 1193.91   26.92
  -3   1   4   91.15    3.07
  -3   1   4   90.27    3.33
  -3   1   3  616.99   14.53
  -3   1   3  607.79   14.50
  -3   1   2   12.19    0.98
  -3   1   2   13.19    0.86
  -3   1   1   88.98    3.22
  -3   1   1   92.53    2.60
  -3   1   0  453.34   10.76
  -3   1   0  415.20    9.28
  -3   1  -1   75.22    2.98
  -3   1  -2 3147.60   71.06
  -3   1  -2 3308.32   71.01
  -3   1  -3  642.09   15.50
  -3   1  -3  606.32   15.63
  -3   1  -4 1366.98   31.42
  -3   1  -4 1355.91   31.87
  -3   1  -5  149.13    5.19
  -3   1  -5  148.84    5.68
  -3   1  -6  894.01   21.53
  -3   1  -6  874.60   22.45
  -3   1  -7  224.90    7.12
  -3   1  -7  217.82    8.01
  -3   1  -8    2.58    0.68
  -3   1  -8    3.27    0.92
  -3   1  -9    0.15    0.66
   3  -1   9    1.32    0.43
   3  -1  10  212.76    6.40
  -3   1 -10  203.62    8.60
  -3   1 -11   10.37    1.93
   3  -1  11   12.17    1.42
   3  -1  11   12.56    1.24
   3  -1  12  411.63   11.35
   3  -1  12  410.55   11.13
   3  -1  13  140.81    5.10
   3  -1  13  133.43    4.93
   3  -1  14  186.15    6.08
   3  -1  14  180.92    5.99
   3  -1  15   36.10    2.14
   3  -1  16    0.73    0.43
   3  -1  17    8.13    0.85
  -3   0  18    4.13    0.55
  -3   0  17    2.97    0.59
  -3   0  16   29.20    1.95
  -3   0  15   15.32    1.52
  -3   0  15   15.48    1.35
  -3   0  14  154.82    5.79
  -3   0  14  154.67    5.42
  -3   0  13   94.91    4.32
  -3   0  13   98.45    4.12
  -3   0  12    1.72    0.59
  -3   0  12    1.65    0.80
  -3   0  12    2.18    0.62
  -3   0  11   14.30    1.50
  -3   0  11   14.82    1.42
  -3   0  11   15.51    1.97
  -3   0  10   28.42    2.04
  -3   0  10   26.75    1.88
  -3   0  10   28.37    2.49
  -3   0   9  206.62    6.77
  -3   0   9  220.57    6.27
  -3   0   9  225.27    7.78
  -3   0   8   10.64    1.48
  -3   0   7 1152.51   27.55
  -3   0   6 1606.50   36.90
  -3   0   5  404.19   10.71
  -3   0   4 1740.22   38.12
  -3   0   4 1694.35   38.55
  -3   0   3  191.96    5.41
  -3   0   3  191.29    5.37
  -3   0   2 1362.44   31.09
  -3   0   2 1408.89   30.79
  -3   0   1  248.01    6.74
  -3   0   1  251.63    6.12
  -3   0   0 1871.15   41.83
  -3   0   0 1887.09   40.73
  -3   0  -1 1576.64   35.39
  -3   0  -2   57.23    2.51
  -3   0  -3  698.94   16.89
  -3   0  -3  703.64   17.22
  -3   0  -4    6.25    0.83
  -3   0  -4    6.31    0.95
  -3   0  -5 1017.77   24.27
  -3   0  -5 1056.04   25.07
  -3   0  -6   77.00    3.90
  -3   0  -6   84.93    3.49
  -3   0  -7    0.68    0.41
  -3   0  -7    0.86    0.55
  -3   0  -8  555.72   16.37
  -3   0  -8  598.61   14.93
  -3   0  -9  876.16   23.88
   3   0   9  919.38   21.37
   3   0  10   15.12    1.49
   3   0  10   14.46    1.27
  -3   0 -10   17.51    2.13
  -3   0 -10   15.12    1.14
   3   0  11  444.71   11.96
  -3   0 -11  427.04   14.26
   3   0  11  455.21   11.86
  -3   0 -12    7.25    1.59
   3   0  12    8.14    1.16
   3   0  12    4.56    0.84
   3   0  13  461.81   11.98
   3   0  13  421.25   11.78
   3   0  14   23.95    1.78
   3   0  15   52.21    2.65
   3   0  16    3.92    0.70
   3   0  17    1.64    0.60
   3   0  18    0.10    0.25
  -3  -1  18   26.50    1.36
  -3  -1  17    8.04    0.88
  -3  -1  16    7.39    0.86
  -3  -1  16    6.98    0.97
  -3  -1  15  157.38    5.47
  -3  -1  15  139.55    5.03
  -3  -1  14  113.78    4.70
  -3  -1  14  113.96    4.51
  -3  -1  13    1.81    0.63
  -3  -1  13    1.30    0.56
  -3  -1  12    9.15    1.18
  -3  -1  12    8.18    1.16
  -3  -1  12    6.59    1.37
  -3  -1  11   30.24    2.15
  -3  -1  11   31.21    2.16
  -3  -1  11   30.14    2.76
  -3  -1  10    6.24    0.93
  -3  -1  10    6.83    1.03
  -3  -1  10    6.74    1.29
  -3  -1  10    5.90    0.77
  -3  -1   9  178.11    6.03
  -3  -1   9  191.67    6.14
  -3  -1   9  193.37    7.21
  -3  -1   9  188.72    5.59
  -3  -1   8  572.48   15.57
  -3  -1   7 1803.30   41.67
  -3  -1   6 1747.73   40.08
  -3  -1   5   17.59    1.45
  -3  -1   4  842.91   19.95
  -3  -1   3   48.05    2.12
  -3  -1   3   47.13    2.01
  -3  -1   2 1036.03   23.43
  -3  -1   2 1024.11   23.24
  -3  -1   1  559.96   13.29
  -3  -1   1  551.23   12.84
  -3  -1   0  682.67   16.24
  -3  -1   0  694.53   15.58
   3   1   1   44.78    1.59
  -3  -1  -1   49.95    2.15
  -3  -1  -2  904.51   20.22
   3   1   2  851.11   19.11
  -3  -1  -3  107.30    3.69
   3   1   3  100.59    2.83
  -3  -1  -4 2682.33   57.82
   3   1   4 2550.56   56.12
   3   1   4 2605.96   55.94
  -3  -1  -4 2546.19   57.16
  -3  -1  -5  229.96    6.85
  -3  -1  -5  242.78    7.55
   3   1   5  240.38    6.04
  -3  -1  -6   20.94    1.50
  -3  -1  -6   20.99    1.83
   3   1   6   23.37    1.27
  -3  -1  -7    1.66    0.59
  -3  -1  -7    2.08    0.53
  -3  -1  -8    2.63    0.82
  -3  -1  -9  323.65   10.79
   3   1  10  248.07    7.59
   3   1  10  263.38    7.56
  -3  -1 -10  249.75    9.39
  -3  -1 -10  266.53    7.15
   3   1  11   76.90    3.41
   3   1  11   73.16    3.31
  -3  -1 -11   74.92    4.61
  -3  -1 -11   80.15    3.06
   3   1  12  443.74   12.12
   3   1  12  468.49   12.21
   3   1  13  201.41    6.50
   3   1  14  151.18    5.28
   3   1  15    4.08    0.84
   3   1  16    0.24    0.39
   3   1  17   65.24    2.69
   3   1  18   28.64    1.46
  -3  -2  17    1.16    0.38
  -3  -2  17    1.35    0.40
  -3  -2  16  233.62    6.77
  -3  -2  16  213.88    6.50
  -3  -2  15    3.16    0.74
  -3  -2  15    2.81    0.70
  -3  -2  14  163.12    5.83
  -3  -2  14  166.20    5.82
  -3  -2  13   24.34    1.94
  -3  -2  13   25.77    1.99
  -3  -2  12   70.79    3.48
  -3  -2  12   72.54    3.55
  -3  -2  11  519.83   15.57
  -3  -2  11  496.16   13.42
  -3  -2  11  518.01   13.61
  -3  -2  11  493.14   12.62
  -3  -2  10  204.31    8.02
  -3  -2  10  197.52    6.56
  -3  -2  10  211.40    6.78
  -3  -2  10  204.99    6.04
  -3  -2   9  361.37   10.20
  -3  -2   9  377.70   11.85
  -3  -2   9  386.36    9.77
  -3  -2   8  260.60    8.80
  -3  -2   7  824.23   20.90
  -3  -2   6    6.18    0.98
  -3  -2   5   73.89    3.33
  -3  -2   4  963.04   22.71
  -3  -2   3   38.68    1.97
  -3  -2   2  564.13   13.56
  -3  -2   2  566.69   13.55
  -3  -2   1   77.70    2.83
  -3  -2   1   78.70    2.72
  -3  -2   0    1.82    0.36
  -3  -2   0    1.65    0.40
  -3  -2  -1 1733.59   38.69
   3   2   1 1741.55   38.37
  -3  -2  -2   12.36    1.01
   3   2   2   10.86    0.80
  -3  -2  -3 2769.04   60.04
   3   2   3 2705.33   59.40
   3   2   4   23.13    1.24
  -3  -2  -4   24.18    1.50
   3   2   5  451.63   10.83
  -3  -2  -5  430.70   11.20
  -3  -2  -6  112.05    3.97
   3   2   6  111.96    3.82
  -3  -2  -6  120.29    4.76
   3   2   6  120.94    3.74
  -3  -2  -7   67.43    2.75
  -3  -2  -7   60.38    3.39
   3   2   7   63.12    2.62
  -3  -2  -8  237.94    8.61
   3   2   8  283.69    7.62
  -3  -2  -9   47.52    3.23
   3   2  10   57.41    2.77
   3   2  10   54.42    2.70
  -3  -2 -10   57.13    3.76
  -3  -2 -10   61.89    2.58
  -3  -2 -11  312.00    8.49
   3   2  11  317.50    8.90
   3   2  12  443.07   11.67
  -3  -2 -12  433.23   11.22
   3   2  13   20.48    1.66
   3   2  14  181.42    5.95
   3   2  15    7.85    0.99
   3   2  16   46.63    2.36
   3   2  17    0.32    0.40
   3   2  18   11.75    0.89
  -3  -3  17  196.08    5.40
  -3  -3  17  189.01    5.43
  -3  -3  16   27.25    1.67
  -3  -3  16   25.46    1.66
  -3  -3  15  229.65    6.89
  -3  -3  15  213.41    6.82
  -3  -3  14   44.85    2.55
  -3  -3  14   41.04    2.51
  -3  -3  13   11.75    1.29
  -3  -3  13   13.44    1.46
  -3  -3  12   19.11    1.67
  -3  -3  12   19.88    1.79
  -3  -3  12   18.68    1.38
  -3  -3  11  488.52   13.11
  -3  -3  11  513.91   13.47
  -3  -3  11  508.27   15.59
  -3  -3  11  473.71   12.34
  -3  -3  10   23.59    1.79
  -3  -3  10   25.33    1.59
  -3  -3  10   24.64    2.56
  -3  -3   9    1.17    0.43
  -3  -3   9    1.16    0.51
  -3  -3   9    2.27    0.81
  -3  -3   8  905.20   23.44
  -3  -3   7  244.34    8.33
  -3  -3   6  131.54    5.27
  -3  -3   5  211.48    6.92
  -3  -3   4  246.94    7.43
  -3  -3   3   42.25    2.21
  -3  -3   2  103.76    3.69
  -3  -3   1  669.71   15.92
   3   3   0 1122.39   26.27
  -3  -3   0 1137.49   26.14
  -3  -3  -1    1.13    0.36
   3   3   1    0.67    0.28
   3   3   2 1845.15   41.60
  -3  -3  -2 1910.16   41.75
  -3  -3  -3    0.81    0.33
   3   3   3    0.24    0.30
  -3  -3  -4 1718.59   39.87
   3   3   4 1858.97   39.88
   3   3   5  951.04   21.78
  -3  -3  -5  927.07   21.80
   3   3   6  603.43   14.86
  -3  -3  -6  615.65   14.73
   3   3   7   48.99    2.42
   3   3   7   45.36    2.23
   3   3   8   25.23    1.72
   3   3   9   89.53    3.78
   3   3  10  120.69    4.32
  -3  -3 -10  123.11    4.21
   3   3  11  277.84    7.95
  -3  -3 -11  273.62    7.75
   3   3  12  107.39    4.11
  -3  -3 -12  108.33    3.97
   3   3  13  261.51    7.71
  -3  -3 -13  255.55    7.35
   3   3  14  143.47    5.03
   3   3  15   10.84    1.13
   3   3  16   52.48    2.50
   3   3  17   34.77    1.81
   3   3  18    9.67    0.79
  -3  -4  17   36.31    1.71
  -3  -4  16  123.49    3.96
  -3  -4  16  118.53    4.16
  -3  -4  15   43.00    2.20
  -3  -4  15   36.00    2.21
  -3  -4  14  112.69    4.25
  -3  -4  14  105.96    4.36
  -3  -4  13    9.96    1.18
  -3  -4  13   10.69    1.33
  -3  -4  13    8.67    0.91
  -3  -4  12    3.58    0.82
  -3  -4  12    3.97    0.77
  -3  -4  12    5.68    0.78
  -3  -4  11   28.44    1.98
  -3  -4  11   30.62    2.23
  -3  -4  11   28.97    2.97
  -3  -4  11   26.82    1.71
  -3  -4  10    0.47    0.44
  -3  -4  10    0.80    0.43
  -3  -4  10    0.39    0.31
  -3  -4   9  617.67   15.86
  -3  -4   9  655.86   18.55
  -3  -4   9  651.54   15.50
  -3  -4   8  374.59   12.61
  -3  -4   8  426.62   10.53
  -3  -4   7 1073.44   27.04
  -3  -4   6    2.05    0.72
  -3  -4   5  823.13   20.78
  -3  -4   4    6.64    1.01
  -3  -4   3   86.73    3.66
  -3  -4   2    1.44    0.49
  -3  -4   1 1097.63   25.43
   3   4   0   27.95    1.73
  -3  -4   0   27.27    1.65
   3   4   1  442.80   11.40
   3   4   2   10.85    1.03
   3   4   3 1455.75   33.06
   3   4   4    5.22    0.75
   3   4   5  112.19    4.04
   3   4   6  172.93    5.59
   3   4   7   12.57    1.26
   3   4   8  152.45    5.34
   3   4   8  135.48    4.99
  -3  -4  -9  208.19    6.20
   3   4   9  201.77    6.76
  -3  -4 -10  130.44    4.50
   3   4  10  130.66    4.47
   3   4  10  124.57    5.09
   3   4  11  225.70    6.74
  -3  -4 -11  221.26    6.69
  -3  -4 -12  123.61    4.41
   3   4  12  122.90    4.46
   3   4  13   30.02    1.93
  -3  -4 -13   30.17    1.87
   3   4  14   91.07    3.68
   3   4  15   87.83    3.54
   3   4  16   -0.09    0.38
   3   4  17   34.05    1.74
  -3  -4 -18   99.05    3.36
  -3  -5  17    8.87    0.76
  -3  -5  16   79.36    3.07
  -3  -5  15    1.53    0.49
  -3  -5  14   15.75    1.50
  -3  -5  13    0.64    0.48
  -3  -5  13   -0.20    0.30
  -3  -5  12  184.82    6.37
  -3  -5  12  166.52    5.36
  -3  -5  11   -0.27    0.48
  -3  -5  11    0.53    0.36
  -3  -5  10   11.11    1.90
  -3  -5  10    8.06    0.92
  -3  -5   9  420.37   13.91
  -3  -5   9  421.14   10.84
  -3  -5   8  693.86   20.34
  -3  -5   8  747.55   17.43
  -3  -5   8  720.34   17.41
  -3  -5   7   33.03    1.74
  -3  -5   7   28.01    2.64
  -3  -5   7   30.93    1.71
  -3  -5   7   31.41    1.73
  -3  -5   6   83.89    4.47
  -3  -5   5    0.45    0.67
  -3  -5   4    4.58    0.93
  -3  -5   3  514.55   13.79
  -3  -5   2  254.84    7.75
  -3  -5   1   51.64    2.64
   3   5  -1   52.39    2.73
   3   5   0 1059.62   25.14
   3   5   1  655.47   16.37
   3   5   2  273.99    7.99
   3   5   3  251.54    7.47
   3   5   4  351.88    9.76
   3   5   5    4.20    0.80
   3   5   6   88.26    3.78
   3   5   7   77.23    3.59
   3   5   8  138.38    5.35
   3   5   9  122.27    5.22
   3   5   9  127.85    5.16
  -3  -5  -9  136.74    4.64
   3   5  10  587.09   16.09
  -3  -5 -10  606.80   15.06
   3   5  11   22.00    1.56
  -3  -5 -11   17.34    1.47
   3   5  12   26.54    1.79
  -3  -5 -12   26.51    1.82
   3   5  13  137.15    4.77
  -3  -5 -13  131.43    4.70
   3   5  14   49.71    2.51
  -3  -5 -14   46.86    2.36
   3   5  15    0.68    0.36
   3   5  16   43.57    2.14
   3   5  16   46.77    2.07
   3   5  17   41.69    1.87
  -3  -5 -17   44.23    2.24
  -3  -5 -18   32.27    1.61
  -3  -6  16    9.88    0.91
  -3  -6  15    0.39    0.40
  -3  -6  14   19.15    1.58
  -3  -6  13    4.32    0.85
  -3  -6  13    3.82    0.60
  -3  -6  12   41.35    2.60
  -3  -6  12   40.43    2.10
  -3  -6  11  172.35    6.19
  -3  -6  11  162.40    5.28
  -3  -6  10   18.27    1.70
  -3  -6  10   17.61    2.47
  -3  -6  10   16.43    1.34
  -3  -6   9  629.74   19.28
  -3  -6   9  638.65   15.60
  -3  -6   8   23.96    2.69
  -3  -6   8   25.14    1.68
  -3  -6   8   25.08    1.62
  -3  -6   7  168.77    5.15
  -3  -6   7  162.21    7.33
  -3  -6   7  174.74    5.31
  -3  -6   6    6.50    0.76
  -3  -6   6    6.54    0.78
  -3  -6   5   -0.24    0.52
  -3  -6   4   11.63    1.51
  -3  -6   3   17.25    1.74
  -3  -6   2  104.17    4.48
   3   6  -2  111.94    4.73
   3   6  -1 1056.48   25.64
   3   6   0 1026.74   24.88
   3   6   1  793.58   19.79
   3   6   2  955.50   23.18
   3   6   3  210.81    6.87
   3   6   4   29.91    2.10
   3   6   5  159.30    5.83
   3   6   6   65.30    3.35
   3   6   7    3.31    0.81
   3   6   8  141.17    5.67
  -3  -6  -8  139.86    4.88
   3   6   9  806.23   21.43
  -3  -6  -9  853.15   20.28
  -3  -6 -10  322.78    9.11
   3   6  10  309.98   10.08
   3   6  11  272.56    9.34
  -3  -6 -11  280.04    8.22
  -3  -6 -12    0.82    0.55
  -3  -6 -13   42.92    2.39
  -3  -6 -14    0.18    0.32
   3   6  15    2.65    0.61
  -3  -6 -16   16.69    1.48
   3   6  16   18.41    1.21
  -3  -6 -17    0.52    0.36
  -3  -7  16    6.20    0.65
  -3  -7  15    0.30    0.36
  -3  -7  14   56.43    2.73
  -3  -7  13    2.04    0.65
  -3  -7  13    2.21    0.48
  -3  -7  12  109.35    4.47
  -3  -7  12  106.69    3.81
  -3  -7  11   65.77    3.40
  -3  -7  11   65.40    2.85
  -3  -7  10  231.20    7.56
  -3  -7  10  222.23    6.68
  -3  -7   9   -0.24    0.47
  -3  -7   9    0.23    0.76
  -3  -7   9    1.13    0.51
  -3  -7   8  643.46   17.03
  -3  -7   8  611.80   19.63
  -3  -7   8  700.43   16.53
  -3  -7   8  672.59   16.14
  -3  -7   8  666.54   16.33
  -3  -7   7  110.93    4.56
  -3  -7   7  117.16    6.30
  -3  -7   7  120.81    4.14
  -3  -7   7  130.17    4.37
  -3  -7   6   12.31    1.27
  -3  -7   6   12.02    1.11
  -3  -7   6   10.66    1.78
  -3  -7   6   13.50    1.11
  -3  -7   6   12.99    1.11
  -3  -7   5   76.91    2.91
  -3  -7   5   74.60    4.48
  -3  -7   5   78.66    3.03
  -3  -7   5   82.70    3.09
  -3  -7   4    3.90    1.04
   3   7  -3  269.51    9.06
  -3  -7   3  238.18    8.52
   3   7  -2  271.44    9.07
   3   7  -1    1.02    0.57
   3   7   0  233.64    7.92
   3   7   1  509.57   14.07
   3   7   2  116.10    4.85
   3   7   3  476.62   13.21
   3   7   4  351.53   10.50
   3   7   5   29.77    2.29
   3   7   6   19.44    1.86
   3   7   7  753.49   19.28
  -3  -7  -7  742.49   18.18
  -3  -7  -7  708.23   17.93
   3   7   8   62.77    3.65
  -3  -7  -8   58.56    2.96
   3   7   9  855.96   22.61
  -3  -7  -9  880.74   21.31
   3   7  10  519.41   15.24
   3   7  10  510.50   14.95
  -3  -7 -10  529.45   13.82
   3   7  11   16.67    1.98
  -3  -7 -11   18.46    1.64
  -3  -7 -12  252.13    7.75
  -3  -7 -13  124.78    4.59
  -3  -7 -13  116.67    5.14
  -3  -7 -14    6.88    0.89
  -3  -7 -14    5.84    1.09
  -3  -7 -15   15.27    1.50
   3   7  15   13.81    1.19
   3   7  16   33.48    1.65
  -3  -7 -16   35.88    2.10
  -3  -7 -17   68.81    2.74
  -3  -8  15   66.09    2.52
  -3  -8  14    2.44    0.55
  -3  -8  13    1.02    0.52
  -3  -8  13    0.82    0.32
  -3  -8  12   16.64    1.53
  -3  -8  12   16.79    1.24
  -3  -8  11   86.26    3.91
  -3  -8  11   86.83    3.37
  -3  -8  10   80.98    3.86
  -3  -8  10   84.60    3.39
  -3  -8   9  141.85    5.46
  -3  -8   9  145.73    4.93
  -3  -8   8   59.93    3.23
  -3  -8   8   63.68    4.75
  -3  -8   8   66.33    3.06
  -3  -8   8   67.75    2.87
  -3  -8   7  115.63    4.73
  -3  -8   7  115.71    6.50
  -3  -8   7  133.87    4.58
  -3  -8   7  127.53    4.35
  -3  -8   6   55.80    2.92
  -3  -8   6   60.01    4.33
  -3  -8   6   64.08    2.80
  -3  -8   6   59.80    2.68
  -3  -8   5   43.04    2.10
  -3  -8   5   42.35    2.37
  -3  -8   5   45.43    3.58
   3   8  -5   41.83    3.52
  -3  -8   5   46.18    2.24
  -3  -8   5   48.25    2.29
  -3  -8   4   47.01    2.23
  -3  -8   4   45.11    2.08
   3   8  -4   43.80    3.46
  -3  -8   4   43.68    3.40
  -3  -8   4   47.66    2.25
   3   8  -3  394.79   12.98
  -3  -8   3  420.65   10.56
   3   8  -2    5.55    1.18
   3   8  -1  295.53    9.90
   3   8   0    0.26    0.50
   3   8   1    0.00    0.57
   3   8   2   15.50    1.72
   3   8   3  784.82   20.37
   3   8   4   36.49    2.68
  -3  -8  -5   58.37    2.81
   3   8   5   63.54    3.66
  -3  -8  -6  598.05   15.17
  -3  -8  -6  575.25   15.14
   3   8   7  103.10    4.89
  -3  -8  -7   91.68    3.94
  -3  -8  -7   93.05    3.98
   3   8   8  875.27   21.99
  -3  -8  -8  840.50   20.41
   3   8   9   37.10    2.93
  -3  -8  -9   34.35    2.45
  -3  -8  -9   37.92    2.45
   3   8  10  365.42   11.78
   3   8  10  367.79   11.61
  -3  -8 -10  371.28   10.41
  -3  -8 -11    5.78    1.03
  -3  -8 -11    4.21    0.95
  -3  -8 -12    6.71    1.03
  -3  -8 -12    8.05    1.29
   3   8  12    7.52    1.08
  -3  -8 -13   55.67    2.81
  -3  -8 -13   53.66    3.21
   3   8  13   58.56    2.90
  -3  -8 -14   10.50    1.31
   3   8  14   10.46    1.11
  -3  -8 -15    0.91    0.51
   3   8  15    1.55    0.46
  -3  -8 -16   60.23    2.69
   3   8  16   57.71    2.22
  -3  -8 -17   38.95    1.80
  -3  -9  14   10.98    0.92
  -3  -9  13   25.88    1.64
  -3  -9  13   26.40    1.33
  -3  -9  12   28.28    1.86
  -3  -9  12   25.95    1.49
  -3  -9  11   20.35    1.69
  -3  -9  11   20.93    1.42
  -3  -9  10   56.46    3.00
  -3  -9  10   57.34    2.64
  -3  -9   9   24.88    1.95
  -3  -9   9   25.12    1.72
  -3  -9   8   22.24    1.82
  -3  -9   8   21.78    1.53
   3   9  -7   10.68    2.01
  -3  -9   7   13.06    1.35
  -3  -9   7   11.23    1.21
  -3  -9   7   10.17    1.08
   3   9  -6   -0.28    1.32
  -3  -9   6    1.29    0.53
  -3  -9   6    0.84    0.45
   3   9  -5   30.79    3.23
  -3  -9   5   34.04    1.99
  -3  -9   5   32.22    1.92
  -3  -9   4   43.58    2.11
   3   9  -4   44.39    3.70
  -3  -9   4   45.89    2.32
  -3  -9   4   44.51    2.26
  -3  -9   3  288.39    7.88
  -3  -9   3  284.04    7.58
   3   9  -3  271.86   10.38
  -3  -9   2  352.30    9.29
   3   9  -2  340.67   11.77
  -3  -9   1  180.09    5.49
   3   9  -1  174.60    7.41
  -3  -9   0  446.32   11.30
   3   9   0  430.86   13.47
  -3  -9  -1  266.03    7.47
   3   9   1  267.36    9.30
   3   9   2   12.02    1.62
  -3  -9  -3    2.62    0.56
   3   9   3    1.14    0.63
   3   9   3    0.89    0.44
   3   9   4   16.92    1.98
   3   9   4   16.19    1.29
  -3  -9  -4   15.72    1.35
  -3  -9  -4   16.02    1.38
   3   9   5   60.95    3.77
  -3  -9  -5   59.17    2.85
  -3  -9  -5   59.45    2.95
   3   9   5   61.55    2.82
  -3  -9  -6    0.61    0.52
  -3  -9  -6    0.22    0.46
   3   9   6    0.30    0.36
   3   9   7   68.65    4.01
  -3  -9  -7   60.74    3.13
  -3  -9  -7   56.87    3.10
   3   9   7   63.96    3.07
  -3  -9  -8   22.05    1.87
   3   9   8   23.78    2.35
   3   9   8   20.91    1.74
  -3  -9  -8   21.06    1.85
  -3  -9  -9    1.65    0.66
   3   9   9    0.67    0.65
  -3  -9  -9    1.17    0.58
   3   9   9    1.16    0.53
  -3  -9 -10  108.02    4.84
  -3  -9 -10  121.91    4.86
   3   9  10  109.48    4.60
  -3  -9 -11    1.26    0.67
  -3  -9 -11    1.13    0.67
   3   9  11    1.03    0.62
   3   9  12  367.08   10.30
  -3  -9 -12  400.39   10.55
   3   9  13    4.52    0.83
  -3  -9 -13    5.20    1.08
   3   9  14   64.13    2.81
  -3  -9 -14   61.89    3.16
  -3  -9 -15  113.41    4.24
   3   9  15  116.12    3.80
  -3  -9 -16    3.47    0.61
   3   9  16    3.94    0.49
  -3 -10  13   55.45    2.22
  -3 -10  12   11.22    1.02
  -3 -10  12   10.87    0.86
  -3 -10  11  170.18    5.10
  -3 -10  11  172.32    5.55
  -3 -10  10    0.81    0.45
  -3 -10  10    1.32    0.44
  -3 -10   9   57.75    2.95
  -3 -10   9   57.60    2.68
  -3 -10   8   24.61    1.86
  -3 -10   8   25.18    1.64
  -3 -10   7   13.54    1.29
  -3 -10   7   14.21    1.26
  -3 -10   6   10.01    1.08
  -3 -10   6   10.20    1.14
   3  10  -5    4.29    1.30
  -3 -10   5    5.26    0.83
  -3 -10   5    4.64    0.76
  -3 -10   4  185.81    5.93
  -3 -10   4  194.42    5.94
   3  10  -3   32.23    3.29
  -3 -10   3   36.21    2.04
  -3 -10   3   35.69    2.09
  -3 -10   2  527.14   13.18
   3  10  -2  513.98   16.33
  -3 -10   1  357.52    9.53
   3  10  -1  351.04   12.13
  -3 -10   0   16.65    1.33
   3  10   0   17.72    2.20
  -3 -10  -1   50.44    2.47
   3  10   1   50.82    3.61
  -3 -10  -2  132.32    4.55
   3  10   2  125.98    5.97
  -3 -10  -2  123.63    4.41
   3  10   2  135.44    4.40
  -3 -10  -3    0.60    0.41
   3  10   3    0.97    0.68
   3  10   3    0.91    0.40
   3  10   4   21.08    2.27
  -3 -10  -4   22.47    1.66
   3  10   4   23.51    1.62
   3  10   5   30.31    2.70
   3  10   5   30.13    1.93
  -3 -10  -5   29.13    1.97
  -3 -10  -5   29.91    2.07
   3  10   6  165.34    6.91
  -3 -10  -6  155.33    5.55
  -3 -10  -6  157.78    5.78
   3  10   6  164.26    5.54
  -3 -10  -7    7.89    1.14
   3  10   7   11.21    1.65
  -3 -10  -7    7.88    1.08
   3  10   7    8.96    1.13
  -3 -10  -8   11.13    1.32
  -3 -10  -8   10.81    1.39
   3  10   8   11.53    1.33
   3  10   9   14.93    1.52
  -3 -10  -9   12.95    1.47
  -3 -10  -9   12.73    1.46
  -3 -10 -10    4.58    0.92
  -3 -10 -10    4.32    0.91
   3  10  10    4.37    0.86
   3  10  11  152.48    5.40
  -3 -10 -11  135.56    5.55
  -3 -10 -12    7.26    1.09
   3  10  12    8.12    1.05
  -3 -10 -13   61.01    3.16
   3  10  13   65.37    2.93
  -3 -10 -14    1.76    0.60
   3  10  14    2.58    0.57
  -3 -10 -15   41.77    2.11
   3  10  15   43.33    1.88
  -3 -10 -16  103.41    3.30
  -3 -11  12   99.55    2.96
  -3 -11  11   17.88    1.13
  -3 -11  10   74.95    2.87
  -3 -11   9   12.46    1.12
  -3 -11   8  126.35    4.45
  -3 -11   8  126.12    4.25
  -3 -11   7   28.48    1.78
  -3 -11   7   27.35    1.84
  -3 -11   6    0.85    0.47
  -3 -11   6    0.51    0.42
  -3 -11   5   49.37    2.56
  -3 -11   5   51.32    2.57
  -3 -11   4   16.44    1.39
  -3 -11   4   14.04    1.32
  -3 -11   3   31.29    1.92
  -3 -11   3   28.91    1.93
   3  11  -2    0.23    0.66
  -3 -11   2    0.97    0.52
  -3 -11   1  707.96   17.05
   3  11  -1  671.97   20.18
  -3 -11   0   57.57    2.71
   3  11   0   56.00    4.08
  -3 -11  -1    3.84    0.69
   3  11   1    4.14    1.21
  -3 -11  -1    4.23    0.68
  -3 -11  -2   32.31    1.95
   3  11   2   30.56    2.88
  -3 -11  -2   33.66    1.99
   3  11   3   11.96    1.79
  -3 -11  -3   11.33    1.15
  -3 -11  -3   10.16    1.09
   3  11   3   12.95    1.19
   3  11   4   28.54    1.86
  -3 -11  -4   28.46    1.91
   3  11   4   26.06    2.63
   3  11   5  455.12   11.96
   3  11   5  469.54   14.30
  -3 -11  -5  439.09   12.04
   3  11   6  134.88    4.92
  -3 -11  -6  130.58    4.95
   3  11   7  230.35    7.26
  -3 -11  -7  228.48    7.39
  -3 -11  -8   13.56    1.46
   3  11   8   13.66    1.42
   3  11   9   27.70    2.03
  -3 -11  -9   24.43    1.99
  -3 -11 -10    1.69    0.56
   3  11  10    0.77    0.54
  -3 -11 -11   28.35    2.13
   3  11  11   33.41    2.13
   3  11  12   11.15    1.17
  -3 -11 -12    8.80    1.12
  -3 -11 -13    1.49    0.52
   3  11  13    1.88    0.55
  -3 -11 -14   20.49    1.44
   3  11  14   23.78    1.40
  -3 -11 -15   25.41    1.39
  -3 -12  11   87.42    2.69
  -3 -12  10    1.21    0.35
  -3 -12   9    1.82    0.42
  -3 -12   8    2.82    0.56
  -3 -12   7    6.01    0.77
  -3 -12   6   39.12    2.14
  -3 -12   6   39.21    2.14
  -3 -12   5   51.98    2.59
  -3 -12   5   52.16    2.56
  -3 -12   4  185.81    6.09
  -3 -12   4  197.25    6.04
  -3 -12   3   34.04    2.13
  -3 -12   3   33.82    1.99
  -3 -12   2   67.15    3.14
  -3 -12   2   65.83    2.92
  -3 -12   1   18.01    1.42
  -3 -12   0    1.77    0.49
  -3 -12   0    0.83    0.48
  -3 -12  -1  151.60    5.06
  -3 -12  -1  151.56    5.06
  -3 -12  -2   51.26    2.55
  -3 -12  -2   49.84    2.51
  -3 -12  -3   65.64    3.01
  -3 -12  -3   64.30    2.96
  -3 -12  -4  139.73    4.87
  -3 -12  -4  134.85    4.87
  -3 -12  -5    7.55    1.02
  -3 -12  -5    9.71    1.13
   3  12   5    7.33    1.01
  -3 -12  -6  527.08   13.99
   3  12   6  545.50   13.96
  -3 -12  -7   37.19    2.36
   3  12   7   41.54    2.42
   3  12   8   47.28    2.63
  -3 -12  -8   44.01    2.61
   3  12   9    7.65    1.05
  -3 -12  -9    8.47    1.10
  -3 -12 -10    6.82    0.99
   3  12  10    7.85    1.03
  -3 -12 -11    0.10    0.44
   3  12  11    0.14    0.40
   3  12  12    6.97    0.86
  -3 -12 -12    5.61    0.83
  -3 -12 -13   11.71    1.06
  -3 -12 -14   41.69    1.86
  -3 -13   9   13.74    0.94
  -3 -13   8   -0.24    0.38
  -3 -13   7   11.57    1.04
  -3 -13   7   12.25    0.99
  -3 -13   6   64.04    2.69
  -3 -13   5  134.03    4.54
  -3 -13   5  133.33    4.43
  -3 -13   4   11.71    1.11
  -3 -13   4   12.39    1.21
  -3 -13   3   10.36    1.04
  -3 -13   3   10.74    1.17
  -3 -13   2   55.47    2.54
  -3 -13   2   51.86    2.69
  -3 -13   1   -0.42    0.55
  -3 -13   1    0.70    0.37
  -3 -13   0   21.59    1.52
  -3 -13   0   22.47    1.53
  -3 -13  -1   23.51    1.60
  -3 -13  -1   24.99    1.65
  -3 -13  -2   14.21    1.24
  -3 -13  -2   13.30    1.22
  -3 -13  -3   74.66    3.16
  -3 -13  -3   77.92    3.28
  -3 -13  -4   68.71    3.01
  -3 -13  -4   67.32    3.07
  -3 -13  -5  194.75    6.09
  -3 -13  -5  196.43    6.24
  -3 -13  -6    2.20    0.61
  -3 -13  -6    2.76    0.64
  -3 -13  -7    5.21    0.85
  -3 -13  -7    3.76    0.71
  -3 -13  -8    0.01    0.42
  -3 -13  -8   -0.24    0.40
  -3 -13  -9    6.36    0.82
  -3 -13  -9    9.90    1.10
  -3 -13 -10    0.91    0.40
  -3 -13 -10    0.77    0.33
  -3 -13 -11    0.16    0.30
  -3 -13 -11   -0.04    0.29
  -3 -13 -12    1.08    0.36
  -3 -13 -12    0.34    0.26
  -3 -14   8    5.52    0.57
  -3 -14   7    7.81    0.74
  -3 -14   6   86.53    2.99
  -3 -14   5   22.24    1.39
  -3 -14   4   55.23    2.33
  -3 -14   4   56.23    2.50
  -3 -14   3   22.71    1.42
  -3 -14   3   20.08    1.47
  -3 -14   2    8.43    0.90
  -3 -14   2    6.70    0.90
  -3 -14   1    0.54    0.31
  -3 -14   1    0.80    0.42
  -3 -14   0    8.75    1.07
  -3 -14   0    8.61    0.90
  -3 -14  -1    8.73    0.93
  -3 -14  -1    9.97    0.97
  -3 -14  -2    8.16    0.92
  -3 -14  -2    6.65    0.82
  -3 -14  -3   25.68    1.59
  -3 -14  -3   24.29    1.61
  -3 -14  -4  174.79    5.41
  -3 -14  -4  181.07    5.60
  -3 -14  -5   68.98    2.83
  -3 -14  -5   70.97    3.02
  -3 -14  -6   28.62    1.69
  -3 -14  -6   30.74    1.85
  -3 -14  -7   32.86    1.78
  -3 -14  -7   33.05    1.92
  -3 -14  -8   14.73    1.11
  -3 -14  -8   14.32    1.22
  -3 -14  -9    4.52    0.66
  -3 -14  -9    3.74    0.54
  -3 -14 -10   21.13    1.36
  -3 -14 -11    2.18    0.42
  -3 -15   6    1.87    0.39
  -3 -15   5  177.97    4.94
  -3 -15   5  184.89    5.12
  -3 -15   4   30.92    1.58
  -3 -15   3   95.35    3.35
  -3 -15   2   10.25    0.98
  -3 -15   1    1.27    0.43
  -3 -15   1    3.44    0.53
  -3 -15   0    2.29    0.45
  -3 -15   0    2.38    0.56
  -3 -15  -1    6.66    0.89
  -3 -15  -2    7.85    0.81
  -3 -15  -2    8.73    1.00
  -3 -15  -3   98.57    3.45
  -3 -15  -3  103.27    3.84
  -3 -15  -4   16.39    1.19
  -3 -15  -4   14.79    1.27
  -3 -15  -5   27.51    1.58
  -3 -15  -5   27.91    1.68
  -3 -15  -6   44.53    2.07
  -3 -15  -6   48.43    2.15
  -3 -15  -7    5.66    0.69
  -3 -15  -8   32.04    1.61
  -3 -15  -9   23.45    1.27
  -3 -16   4   34.77    1.47
  -3 -16   3    4.99    0.54
  -3 -16   2    1.09    0.33
  -3 -16   1    0.05    0.26
  -3 -16   0    1.56    0.41
  -3 -16  -1   -0.40    0.35
  -3 -16  -2   37.98    1.89
  -3 -16  -3   39.08    1.90
  -3 -16  -4   93.34    3.24
  -3 -16  -5   31.64    1.56
  -4  13   6   72.89    2.50
  -4  13   5    2.67    0.46
  -4  13   4    1.99    0.45
   4 -13  -4    1.63    0.42
  -4  13   3    0.98    0.35
   4 -13  -3    0.29    0.30
   4 -13  -2   14.39    1.07
  -4  13   2   14.10    1.07
  -4  13   1    2.39    0.48
   4 -13  -1    1.96    0.48
  -4  13   0    1.07    0.36
   4 -13   0    0.85    0.34
  -4  13  -1    0.38    0.25
   4 -13   1    0.23    0.28
  -4  13  -1    0.30    0.29
  -4  13  -2   15.44    0.93
   4 -13   2   14.32    1.01
   4 -13   3   12.07    0.87
  -4  12  10    1.08    0.29
  -4  12   9    2.38    0.43
  -4  12   8   36.86    1.77
  -4  12   8   36.71    1.58
  -4  12   7   46.56    1.99
  -4  12   7   46.14    2.08
   4 -12  -6   11.12    1.00
  -4  12   6   10.58    0.94
  -4  12   6   10.29    0.93
  -4  12   5    9.15    0.91
   4 -12  -5    7.05    0.81
  -4  12   5    7.28    0.78
  -4  12   4   30.17    1.60
  -4  12   4   32.26    1.81
   4 -12  -4   31.99    1.81
  -4  12   3   26.98    1.67
   4 -12  -3   27.48    1.67
  -4  12   2   56.10    2.55
   4 -12  -2   56.56    2.55
   4 -12  -1   21.27    1.46
  -4  12   1   21.48    1.49
  -4  12   0    0.23    0.38
   4 -12   0   -0.07    0.39
  -4  12  -1  135.96    4.50
   4 -12   1  141.08    4.56
   4 -12   2    5.39    0.74
  -4  12  -2    5.23    0.73
  -4  12  -3  189.46    5.56
  -4  12  -3  190.36    5.37
   4 -12   3  198.00    5.67
  -4  12  -4    0.38    0.26
   4 -12   4    0.71    0.37
   4 -12   5   39.11    1.80
   4 -12   6    0.69    0.30
  -4  11  11   14.25    0.98
  -4  11  10    0.49    0.31
  -4  11   9   10.48    1.00
  -4  11   8  210.72    6.41
  -4  11   8  227.06    6.12
   4 -11  -7   92.92    3.60
  -4  11   7  103.90    3.78
  -4  11   6   10.12    1.06
   4 -11  -6    8.84    0.99
   4 -11  -5    1.15    0.42
  -4  11   5    2.18    0.55
   4 -11  -4    0.81    0.42
  -4  11   4    0.49    0.33
   4 -11  -3  108.77    4.09
  -4  11   3  113.73    4.13
  -4  11   3  105.18    3.79
  -4  11   2   99.48    3.81
  -4  11   2   90.85    3.35
   4 -11  -2   94.26    3.71
   4 -11  -1    2.22    0.64
  -4  11   1    2.66    0.65
   4 -11   0    9.17    1.03
  -4  11   0    9.62    1.09
   4 -11   1   15.58    1.32
  -4  11  -1   15.13    1.34
   4 -11   2   77.86    3.20
  -4  11  -2   73.67    3.15
   4 -11   3   55.65    2.59
  -4  11  -3   54.78    2.57
   4 -11   4   93.33    3.52
  -4  11  -4   93.21    3.32
  -4  11  -4   91.93    3.47
  -4  11  -5   -0.11    0.30
   4 -11   5    0.52    0.42
   4 -11   6   15.07    1.14
   4 -11   7    7.57    0.78
   4 -11   8    6.11    0.62
  -4  10  12    4.81    0.58
  -4  10  11    2.23    0.50
  -4  10  10    0.16    0.42
  -4  10   9  108.41    4.01
  -4  10   8    8.02    1.05
   4 -10  -7  375.00   10.46
  -4  10   7  407.10   10.65
   4 -10  -6   89.97    3.70
  -4  10   6   89.77    3.72
   4 -10  -5   55.87    2.80
  -4  10   5   59.65    2.86
  -4  10   4   18.01    1.48
   4 -10  -4   18.73    1.54
   4 -10  -3   16.47    1.44
  -4  10   3   16.39    1.36
  -4  10   2    4.88    0.75
   4 -10  -2    6.88    0.93
  -4  10   1  117.57    4.06
   4 -10  -1  124.15    4.47
  -4  10   1  112.54    4.37
  -4  10   0    0.45    0.49
   4 -10   0    0.85    0.52
  -4  10  -1   13.28    1.33
   4 -10   1   12.54    1.26
   4 -10   2   83.01    3.49
  -4  10  -2   85.84    3.57
  -4  10  -3    3.32    0.74
   4 -10   3    2.24    0.61
  -4  10  -4    1.61    0.49
  -4  10  -4    2.24    0.58
   4 -10   4    1.85    0.57
  -4  10  -5   28.49    1.66
   4 -10   5   25.78    1.73
  -4  10  -6   33.41    1.72
   4 -10   6   31.81    1.88
   4 -10   7   15.58    1.23
   4 -10   8   39.77    1.94
   4 -10   9   15.78    1.08
   4 -10  10   18.68    1.07
  -4   9  13    5.07    0.57
  -4   9  12   15.88    1.16
  -4   9  11   20.63    1.43
  -4   9  10  119.99    4.33
  -4   9   9    7.07    1.11
  -4   9   9    8.48    1.07
  -4   9   8  670.33   17.33
  -4   9   8  680.85   16.94
  -4   9   7   22.35    1.90
   4  -9  -7   19.27    1.63
  -4   9   7   20.30    1.69
  -4   9   6  153.22    5.66
   4  -9  -6  156.95    5.41
  -4   9   6  145.98    5.31
   4  -9  -5   -0.44    0.48
  -4   9   5    0.28    0.41
   4  -9  -4   82.97    3.55
  -4   9   4   82.09    3.53
   4  -9  -3    2.54    0.65
  -4   9   3    2.93    0.66
   4  -9  -2   22.63    1.68
  -4   9   2   24.33    1.67
   4  -9  -1   27.54    1.89
  -4   9   1   33.00    1.89
   4  -9   0  366.52    9.89
  -4   9   0  350.84    9.90
   4  -9   1  146.56    5.00
  -4   9  -1  138.32    5.00
   4  -9   2   32.31    2.00
  -4   9  -2   29.98    2.01
   4  -9   3   40.83    2.30
  -4   9  -3   42.50    2.38
  -4   9  -4    5.62    0.86
   4  -9   4    6.03    0.89
  -4   9  -5    0.38    0.45
  -4   9  -5    0.74    0.39
   4  -9   5    0.23    0.38
  -4   9  -6   30.44    1.77
   4  -9   6   26.32    1.77
   4  -9   7   72.34    3.09
   4  -9   8   26.44    1.67
   4  -9   9   27.42    1.63
   4  -9  10   52.08    2.22
   4  -9  11   79.45    2.71
  -4   8  14    3.27    0.42
  -4   8  13   40.22    1.83
  -4   8  12   23.34    1.49
  -4   8  12   23.65    1.63
  -4   8  11    2.69    0.70
  -4   8  11    1.87    0.56
  -4   8  10   28.77    2.06
  -4   8  10   30.96    1.97
  -4   8   9   69.84    3.49
  -4   8   8   86.29    3.98
  -4   8   7  192.63    6.66
  -4   8   6   28.89    2.15
   4  -8  -5    5.33    0.87
  -4   8   5    3.83    0.89
  -4   8   4   78.52    3.62
   4  -8  -4   74.42    3.30
  -4   8   4   77.87    3.41
  -4   8   3   13.80    1.40
   4  -8  -3   13.87    1.30
  -4   8   3   14.56    1.34
   4  -8  -2   19.80    1.54
  -4   8   2   19.82    1.51
   4  -8  -1  249.72    7.29
  -4   8   1  245.62    8.96
  -4   8   1  246.25    7.18
  -4   8   0   24.38    2.43
  -4   8   0   23.96    1.58
  -4   8   0   23.88    1.72
   4  -8   0   22.76    1.63
  -4   8  -1  299.35    8.62
  -4   8  -1  297.37   10.72
   4  -8   1  309.45    8.55
  -4   8  -2  182.72    7.92
   4  -8   2  184.16    5.82
  -4   8  -2  181.77    5.92
   4  -8   3  110.00    4.16
  -4   8  -3  115.51    4.31
   4  -8   4    6.66    0.95
  -4   8  -4    6.67    0.96
  -4   8  -5   34.58    2.03
  -4   8  -5   32.51    2.07
   4  -8   5   33.08    2.04
  -4   8  -6    5.79    0.81
   4  -8   6    4.57    0.77
  -4   8  -7   13.13    1.16
   4  -8   7   10.78    1.15
   4  -8   8   81.61    3.38
   4  -8   9   24.89    1.67
   4  -8  10  154.21    4.89
   4  -8  11    7.26    0.81
   4  -8  12   34.50    1.62
  -4   7  14   19.87    1.24
  -4   7  13   29.62    1.77
  -4   7  13   31.12    1.63
  -4   7  12    8.19    1.02
  -4   7  12    8.77    0.94
  -4   7  12    8.43    1.09
  -4   7  11   25.85    1.93
  -4   7  11   27.21    1.77
  -4   7  11   23.37    1.84
  -4   7  10  263.93    8.15
  -4   7  10  253.00    8.00
  -4   7   9   19.26    1.79
  -4   7   9   20.83    1.76
  -4   7   8   19.82    1.78
  -4   7   7    5.21    0.97
  -4   7   6   22.94    1.85
  -4   7   5   13.23    1.40
  -4   7   4   19.17    1.64
  -4   7   3    5.61    0.91
  -4   7   3    8.52    0.99
   4  -7  -2  168.72    5.41
  -4   7   2  175.06    5.77
  -4   7   2  172.86    6.70
  -4   7   2  171.90    5.48
  -4   7   1  372.77   10.05
  -4   7   1  360.13   11.43
   4  -7  -1  359.39    9.68
  -4   7   1  366.76    9.71
  -4   7   0  703.25   19.18
   4  -7   0  691.58   16.88
  -4   7   0  702.92   16.82
  -4   7  -1  175.18    7.26
   4  -7   1  173.08    5.44
  -4   7  -1  169.67    5.53
  -4   7  -1  173.58    5.28
  -4   7  -2   84.17    4.80
   4  -7   2   83.04    3.29
  -4   7  -2   79.92    3.35
  -4   7  -3    2.29    0.83
  -4   7  -3    2.80    0.68
   4  -7   3    2.91    0.61
  -4   7  -4    3.62    0.75
  -4   7  -4    2.53    0.75
  -4   7  -5    3.56    1.16
  -4   7  -5    4.15    0.79
  -4   7  -5    4.25    1.20
   4  -7   5    3.52    0.72
  -4   7  -6   66.82    2.93
   4  -7   6   60.45    2.89
  -4   7  -7  157.68    5.07
   4  -7   7  144.92    5.12
  -4   7  -8    9.48    0.98
   4  -7   8    8.60    1.06
   4  -7   9  133.04    4.88
   4  -7   9  146.20    4.90
   4  -7  10    4.35    0.74
   4  -7  10    4.28    0.73
   4  -7  11   24.19    1.50
   4  -7  11   21.99    1.49
   4  -7  12   37.74    1.75
   4  -7  12   38.33    1.88
   4  -7  13    2.61    0.46
  -4   6  15    5.74    0.73
  -4   6  14   19.45    1.30
  -4   6  14   17.52    1.43
  -4   6  13    0.61    0.36
  -4   6  13    0.93    0.50
  -4   6  13    1.75    0.60
  -4   6  12    5.87    0.93
  -4   6  12    4.66    0.92
  -4   6  12    5.23    0.73
  -4   6  11  133.60    4.69
  -4   6  11  131.76    5.28
  -4   6  10   51.87    2.91
  -4   6  10   51.65    2.99
  -4   6   9   79.68    3.76
  -4   6   9   73.55    3.62
  -4   6   8    5.34    0.95
  -4   6   8    5.52    0.97
  -4   6   7    3.30    0.76
  -4   6   7    1.98    0.63
  -4   6   6    4.49    0.87
  -4   6   6    4.87    0.84
  -4   6   5   53.26    2.78
  -4   6   4   23.22    1.72
  -4   6   3  279.79    8.20
  -4   6   3  298.75    9.09
  -4   6   2  222.68    7.61
  -4   6   2  212.43    6.59
  -4   6   2  223.68    6.49
  -4   6   1  230.92    8.15
  -4   6   1  236.80    7.02
  -4   6   1  248.71    6.89
  -4   6   0  407.41   10.54
  -4   6   0  400.80   12.14
  -4   6   0  392.18   10.23
  -4   6  -1   14.04    1.80
  -4   6  -1   16.22    1.21
   4  -6   2    6.95    0.80
  -4   6  -2    6.99    1.33
  -4   6  -2    7.04    0.87
  -4   6  -3   -1.09    0.75
  -4   6  -3   -0.75    0.91
  -4   6  -3    0.12    0.31
   4  -6   3   -0.01    0.36
   4  -6   4   10.59    1.03
  -4   6  -4   13.58    1.22
  -4   6  -4   11.89    1.83
  -4   6  -4   12.67    1.92
   4  -6   5   13.02    1.19
  -4   6  -5   13.02    1.22
  -4   6  -5   11.65    1.88
  -4   6  -5   11.36    1.85
  -4   6  -6   31.58    1.88
   4  -6   6   25.78    1.75
  -4   6  -6   27.19    2.71
  -4   6  -6   27.83    2.93
  -4   6  -7   59.97    2.71
   4  -6   7   54.76    2.72
  -4   6  -8  415.81   10.63
   4  -6   8  391.04   10.77
   4  -6   9   35.90    2.14
   4  -6  10   24.93    1.90
   4  -6  10   29.91    1.87
   4  -6  11   17.14    1.44
   4  -6  11   15.86    1.33
   4  -6  12    4.08    0.67
   4  -6  12    3.65    0.65
   4  -6  13   66.42    2.54
   4  -6  13   61.53    2.55
   4  -6  14   41.10    1.70
   4  -6  14   40.95    1.79
  -4   5  16   27.17    1.52
  -4   5  15    6.22    0.68
  -4   5  15    6.12    0.83
  -4   5  14   59.70    2.59
  -4   5  14   55.92    2.89
  -4   5  13   10.16    1.13
  -4   5  13    9.32    1.21
  -4   5  12  454.66   11.82
  -4   5  12  425.13   11.03
  -4   5  12  415.61   12.18
  -4   5  11  127.43    4.86
  -4   5  11  122.21    4.35
  -4   5  11  118.57    5.05
  -4   5  10  101.75    4.33
  -4   5  10  106.73    4.63
  -4   5   9   20.49    1.76
  -4   5   9   21.84    2.19
  -4   5   9   22.55    1.92
  -4   5   8   17.76    1.61
  -4   5   8   17.97    1.64
  -4   5   7   87.37    3.83
  -4   5   7   96.64    4.04
  -4   5   6   27.38    1.90
  -4   5   6   26.66    1.88
  -4   5   5   16.75    1.42
  -4   5   5   16.77    1.44
  -4   5   4    8.70    1.01
  -4   5   4    7.85    1.09
  -4   5   3  309.09    8.60
  -4   5   3  323.16    9.42
  -4   5   2  112.67    4.69
  -4   5   1  304.65    9.45
  -4   5   0    2.76    0.78
  -4   5  -1  152.21    6.13
  -4   5  -2   30.69    2.56
  -4   5  -2   31.52    1.76
  -4   5  -3   47.89    3.31
  -4   5  -3   50.23    2.34
  -4   5  -3   48.72    3.30
  -4   5  -4    1.07    0.56
  -4   5  -4    2.57    1.00
  -4   5  -4    1.98    0.54
   4  -5   4    2.01    0.47
  -4   5  -5  228.02    6.64
   4  -5   5  223.00    6.48
  -4   5  -5  214.45    8.41
  -4   5  -5  212.10    8.72
  -4   5  -6    1.94    0.82
  -4   5  -6    1.41    0.78
  -4   5  -6    1.81    0.53
   4  -5   6    0.99    0.40
  -4   5  -7  328.81    8.74
   4  -5   7  304.84    8.74
  -4   5  -7  318.35   11.05
  -4   5  -7  320.35   11.93
  -4   5  -8   33.18    1.93
   4  -5   8   32.61    1.99
  -4   5  -8   31.14    2.85
  -4   5  -8   35.41    3.48
  -4   5  -9  133.53    4.46
   4  -5   9  129.60    4.64
   4  -5  10    1.03    0.51
   4  -5  11   82.79    3.65
   4  -5  11   78.31    3.31
   4  -5  12   10.74    1.17
   4  -5  12   10.49    1.06
   4  -5  13   44.31    2.18
   4  -5  13   38.60    2.04
   4  -5  14   76.05    2.80
   4  -5  14   71.44    2.76
   4  -5  15   41.12    1.70
  -4   4  17    0.24    0.23
  -4   4  16    3.73    0.65
  -4   4  15    1.15    0.36
  -4   4  15    1.77    0.56
  -4   4  14    3.55    0.66
  -4   4  14    4.07    0.86
  -4   4  13  206.85    6.48
  -4   4  13  205.57    7.13
  -4   4  12  285.94    8.29
  -4   4  12  256.69    8.69
  -4   4  11  734.85   19.87
  -4   4  11  798.30   19.43
  -4   4  11  788.82   18.67
  -4   4  10  108.38    4.79
  -4   4  10  112.96    4.54
  -4   4  10  116.22    5.44
  -4   4   9  166.50    5.89
  -4   4   9  175.41    6.80
  -4   4   9  173.11    6.25
  -4   4   8    3.72    0.81
  -4   4   8    3.25    0.86
  -4   4   7   38.08    2.35
  -4   4   7   41.47    2.67
  -4   4   6   20.12    1.57
  -4   4   6   24.26    1.90
  -4   4   6   23.26    1.71
  -4   4   5   66.01    2.94
  -4   4   5   71.04    3.11
  -4   4   4  533.15   13.78
  -4   4   3  325.88    9.39
  -4   4   2 1139.93   27.18
  -4   4   1    9.96    1.21
  -4   4   0  525.05   14.18
  -4   4  -1  117.85    5.00
  -4   4  -2   79.12    4.04
  -4   4  -3    9.85    1.45
  -4   4  -3    9.75    1.42
  -4   4  -4   84.15    3.18
  -4   4  -4   81.92    4.39
  -4   4  -4   87.00    4.59
   4  -4   5   84.63    3.20
  -4   4  -5   89.50    3.28
  -4   4  -5   85.27    4.57
  -4   4  -5   88.89    4.91
  -4   4  -5   85.94    3.31
  -4   4  -6  429.69   10.79
   4  -4   6  404.07   10.73
  -4   4  -6  427.91   13.07
  -4   4  -6  427.52   13.81
  -4   4  -7   10.90    1.05
   4  -4   7   10.93    1.09
  -4   4  -7    8.68    1.43
  -4   4  -7    8.83    1.64
  -4   4  -8  442.13   11.31
  -4   4  -8  446.65   13.64
  -4   4  -8  443.42   15.01
   4  -4   8  436.73   11.47
  -4   4  -9   58.60    2.63
  -4   4  -9   65.24    4.81
   4  -4   9   60.04    2.81
   4  -4  10    4.34    0.75
   4  -4  11   67.33    3.40
   4  -4  11   68.05    3.07
   4  -4  12    0.23    0.59
   4  -4  12   -0.04    0.36
   4  -4  13    0.27    0.43
   4  -4  13    1.08    0.56
   4  -4  14    0.03    0.40
   4  -4  14    0.35    0.32
   4  -4  15   38.13    1.81
  -4   3  17   12.19    0.96
  -4   3  16   32.91    1.92
  -4   3  15   37.89    1.86
  -4   3  15   36.62    2.27
  -4   3  14   33.27    2.31
  -4   3  14   34.72    1.97
  -4   3  13   39.02    2.66
  -4   3  13   37.34    2.22
  -4   3  12  519.91   14.58
  -4   3  12  536.09   13.87
  -4   3  11  206.48    7.32
  -4   3  10  291.12    9.12
  -4   3  10  287.85    9.80
  -4   3  10  283.88    7.96
  -4   3   9  162.22    5.96
  -4   3   9  156.57    6.42
  -4   3   8  128.94    5.01
  -4   3   8  129.63    5.43
  -4   3   7  183.02    6.09
  -4   3   7  178.33    6.45
  -4   3   6   11.94    1.31
  -4   3   6   11.57    1.19
  -4   3   5   51.97    2.70
  -4   3   5   56.23    2.63
  -4   3   4   75.90    3.25
  -4   3   4   75.59    3.14
  -4   3   3  720.41   17.77
  -4   3   2   34.97    2.18
  -4   3   1 1298.91   30.46
  -4   3   0  846.78   20.94
  -4   3  -1  173.89    6.17
  -4   3  -2  888.23   22.16
  -4   3  -3  155.61    6.09
  -4   3  -3  152.22    5.97
  -4   3  -4   11.79    1.49
  -4   3  -4   12.40    1.63
  -4   3  -5  232.52    8.26
  -4   3  -5  242.17    8.81
  -4   3  -6  110.08    3.77
  -4   3  -6  104.05    5.04
  -4   3  -6  109.45    5.65
  -4   3  -7 1216.62   28.07
   4  -3   7 1243.48   28.19
  -4   3  -7 1205.82   31.72
  -4   3  -7 1244.04   30.57
  -4   3  -8   50.03    2.35
   4  -3   8   49.98    2.44
  -4   3  -8   56.09    4.21
  -4   3  -8   50.42    3.40
  -4   3  -9  146.66    4.74
   4  -3   9  147.65    4.93
  -4   3  -9  144.31    7.44
  -4   3 -10   21.84    1.46
   4  -3  10   22.15    1.61
   4  -3  11   42.44    2.68
   4  -3  11   40.86    2.30
   4  -3  12   30.95    2.17
   4  -3  12   31.42    1.96
   4  -3  13   26.03    1.86
   4  -3  13   21.99    1.61
   4  -3  14   49.33    2.41
   4  -3  14   40.99    2.17
   4  -3  15    6.46    0.83
   4  -3  16    8.80    0.79
  -4   2  17   38.75    1.88
  -4   2  16   20.74    1.54
  -4   2  15    5.63    0.70
  -4   2  15    5.14    0.92
  -4   2  14   49.33    2.88
  -4   2  14   44.20    2.30
  -4   2  13   34.02    2.46
  -4   2  12  430.95   12.46
  -4   2  11    0.07    0.63
  -4   2  11   -0.07    0.56
  -4   2  10  241.66    8.14
  -4   2  10  264.26    9.12
  -4   2   9    3.30    0.80
  -4   2   9    4.88    1.08
  -4   2   8    1.74    0.54
  -4   2   8    2.42    0.73
  -4   2   7    0.53    0.37
  -4   2   7    0.83    0.55
  -4   2   6  591.66   15.37
  -4   2   5   79.63    3.18
  -4   2   5   78.06    3.40
  -4   2   4 1016.41   23.87
  -4   2   4 1019.99   23.78
  -4   2   3  424.99   11.42
  -4   2   3  448.08   10.96
  -4   2   2  561.96   14.27
  -4   2   1   25.49    1.81
  -4   2   0   13.85    1.36
  -4   2  -1  456.63   12.37
  -4   2  -2  699.49   17.84
  -4   2  -3 1211.74   29.37
  -4   2  -3 1246.39   29.65
  -4   2  -4  184.90    6.77
  -4   2  -4  202.67    7.24
  -4   2  -5  434.78   12.71
  -4   2  -5  456.59   13.42
  -4   2  -6  647.01   17.47
  -4   2  -6  655.74   18.43
  -4   2  -7  700.85   16.89
   4  -2   7  726.93   17.02
  -4   2  -7  716.91   18.98
  -4   2  -7  695.24   20.11
  -4   2  -8  105.08    3.73
   4  -2   8  109.09    3.88
  -4   2  -8  112.24    5.10
  -4   2  -8  102.37    5.81
  -4   2  -9  256.87    7.22
   4  -2   9  265.89    7.51
  -4   2  -9  254.76   10.38
  -4   2 -10    0.48    0.37
  -4   2 -10   -0.27    1.09
   4  -2  10    1.28    0.52
   4  -2  11   57.68    3.20
   4  -2  11   65.97    2.98
   4  -2  12   70.39    3.43
   4  -2  12   63.17    3.01
   4  -2  13   42.83    2.50
   4  -2  13   40.33    2.28
   4  -2  14   60.21    2.86
   4  -2  15   55.77    2.55
   4  -2  16   38.76    1.88
   4  -2  17   11.30    0.82
  -4   1  17   39.51    1.92
  -4   1  16   46.39    2.39
  -4   1  15    0.36    0.29
  -4   1  15    0.53    0.46
  -4   1  14    6.47    1.04
  -4   1  13  399.17   11.63
  -4   1  12   16.33    1.74
  -4   1  12   16.05    1.51
  -4   1  11  237.34    7.98
  -4   1  11  237.94    7.51
  -4   1  11  242.86    9.03
  -4   1  10  164.11    6.08
  -4   1  10  163.75    5.68
  -4   1  10  161.57    6.83
  -4   1   9   24.85    1.97
  -4   1   9   23.39    1.75
  -4   1   9   23.95    2.25
  -4   1   8   17.64    1.57
  -4   1   8   16.86    1.44
  -4   1   8   18.01    1.81
  -4   1   7  270.95    8.64
  -4   1   6  164.92    5.82
  -4   1   5 1242.71   27.49
  -4   1   5 1137.81   27.84
  -4   1   4   21.47    1.50
  -4   1   4   22.33    1.53
  -4   1   3  639.62   15.08
  -4   1   3  617.45   15.45
  -4   1   2    0.34    0.37
  -4   1   2    0.28    0.24
  -4   1   1  151.13    5.12
  -4   1   0   25.69    1.80
  -4   1  -1   29.49    2.00
  -4   1  -2   11.16    1.24
  -4   1  -3  375.86   10.70
  -4   1  -4  110.76    4.68
  -4   1  -4  118.78    5.04
  -4   1  -5  554.45   15.35
  -4   1  -5  530.99   14.61
  -4   1  -6  258.49    8.44
  -4   1  -6  256.92    9.14
  -4   1  -7   82.66    4.09
  -4   1  -7   80.39    4.66
  -4   1  -8  150.63    4.80
   4  -1   8  163.72    5.03
  -4   1  -8  159.91    6.15
  -4   1  -8  153.74    7.17
  -4   1  -9  635.69   15.43
   4  -1   9  653.17   15.76
  -4   1  -9  623.05   19.06
   4  -1  10   66.61    2.99
  -4   1 -10   67.30    2.76
  -4   1 -10   64.76    4.71
   4  -1  11    4.83    1.12
  -4   1 -11    3.63    0.64
   4  -1  11    4.58    0.79
   4  -1  12  136.21    5.14
   4  -1  12  127.38    4.71
   4  -1  13   48.82    2.70
   4  -1  13   44.06    2.44
   4  -1  14  231.13    7.06
   4  -1  15   97.78    3.71
   4  -1  16   94.72    3.41
   4  -1  17    0.20    0.26
  -4   0  17   19.35    1.27
  -4   0  16    9.83    1.06
  -4   0  15   28.58    1.99
  -4   0  14   75.80    3.63
  -4   0  14   69.76    3.20
  -4   0  13    0.14    0.41
  -4   0  13    0.15    0.58
  -4   0  12  105.06    4.63
  -4   0  12  101.68    4.31
  -4   0  11    8.20    1.23
  -4   0  11    8.58    1.17
  -4   0  10   28.12    2.13
  -4   0  10   28.64    2.05
  -4   0  10   29.61    2.67
  -4   0   9  332.86    9.90
  -4   0   9  344.97    9.75
  -4   0   9  351.72   11.09
  -4   0   8   33.01    2.17
  -4   0   8   35.90    2.15
  -4   0   8   36.15    2.69
  -4   0   7  136.01    5.45
  -4   0   6  524.08   14.01
  -4   0   5  392.79   10.76
  -4   0   4  729.52   17.48
  -4   0   4  727.67   17.65
  -4   0   3  484.09   12.34
  -4   0   3  490.40   12.09
  -4   0   2  606.58   15.42
  -4   0   2  643.63   14.80
  -4   0   1  587.43   13.47
  -4   0   1  576.92   14.58
  -4   0   0  699.16   17.14
  -4   0  -1   90.43    3.69
  -4   0  -2  297.40    8.67
  -4   0  -3  188.95    6.31
  -4   0  -4 1178.18   28.05
  -4   0  -5  221.84    7.10
  -4   0  -5  190.66    7.26
  -4   0  -6   94.05    4.17
  -4   0  -6   85.32    4.54
  -4   0  -7  118.50    4.85
  -4   0  -7  106.70    5.42
  -4   0  -8  181.72    5.41
  -4   0  -8  193.66    6.64
  -4   0  -8  171.75    7.60
  -4   0  -9   67.19    2.74
   4   0   9   68.92    2.93
  -4   0  -9   63.51    4.43
  -4   0 -10  254.91    7.18
   4   0  10  262.06    7.55
  -4   0 -10  253.35   10.14
   4   0  11   11.21    1.40
   4   0  11   10.21    1.14
  -4   0 -11    9.93    1.85
  -4   0 -11    9.70    0.98
   4   0  12   16.95    1.61
   4   0  12   15.87    1.46
  -4   0 -12   17.85    1.33
   4   0  13  560.83   14.52
   4   0  14    8.14    1.06
   4   0  15  116.63    4.20
   4   0  16   10.61    1.03
   4   0  17   16.54    1.11
  -4  -1  17   27.52    1.49
  -4  -1  16   19.81    1.44
  -4  -1  16   17.76    1.23
  -4  -1  15   37.74    2.26
  -4  -1  15   35.39    2.05
  -4  -1  14   46.88    2.74
  -4  -1  14   43.56    2.50
  -4  -1  13  447.25   12.67
  -4  -1  13  464.98   12.52
  -4  -1  12    3.01    0.73
  -4  -1  12    3.64    0.85
  -4  -1  11    4.89    0.89
  -4  -1  11    3.32    0.81
  -4  -1  11    4.13    1.18
  -4  -1  10    3.22    0.78
  -4  -1  10    3.78    0.84
  -4  -1  10    2.74    0.95
  -4  -1   9  428.92   12.01
  -4  -1   9  430.93   11.97
  -4  -1   9  454.06   13.58
  -4  -1   9  451.11   11.42
  -4  -1   8  200.70    6.64
  -4  -1   8  218.76    6.75
  -4  -1   8  206.19    7.65
  -4  -1   8  210.54    6.21
  -4  -1   7    0.51    0.44
  -4  -1   6   34.10    2.36
  -4  -1   5  831.40   20.46
  -4  -1   4  385.48   10.38
  -4  -1   3  619.05   15.24
  -4  -1   3  631.73   15.24
  -4  -1   2  961.35   22.83
  -4  -1   2  988.67   22.42
  -4  -1   1  154.28    5.09
  -4  -1   1  159.17    4.52
  -4  -1   0  282.64    8.01
   4   1   0  285.61    7.07
  -4  -1   0  277.89    6.96
   4   1   1   75.53    2.28
  -4  -1  -1   85.43    3.41
  -4  -1  -2  451.58   11.91
  -4  -1  -3  230.29    7.12
  -4  -1  -4   98.23    4.05
  -4  -1  -5  357.37   10.18
  -4  -1  -6  117.43    4.66
  -4  -1  -7   20.31    1.72
  -4  -1  -8   18.59    1.27
  -4  -1  -9  540.00   12.98
   4   1   9  507.26   13.16
  -4  -1 -10   -0.33    0.45
   4   1  10    2.64    0.59
   4   1  11    0.53    0.63
  -4  -1 -11    0.60    0.39
   4   1  11    0.38    0.42
   4   1  12  236.57    7.33
  -4  -1 -12  229.31    6.72
   4   1  13   11.12    1.30
   4   1  14   85.42    3.58
   4   1  15    4.10    0.77
   4   1  16   16.99    1.28
   4   1  17   85.72    3.00
  -4  -2  17    3.36    0.50
  -4  -2  16   68.30    2.80
  -4  -2  16   65.63    2.68
  -4  -2  15   25.05    1.76
  -4  -2  15   23.19    1.67
  -4  -2  14  360.70   10.12
  -4  -2  14  345.32    9.98
  -4  -2  13   42.02    2.61
  -4  -2  13   41.47    2.60
  -4  -2  12   83.28    3.90
  -4  -2  12   83.15    3.90
  -4  -2  11    6.06    1.02
  -4  -2  11    5.90    1.02
  -4  -2  11    8.74    1.64
  -4  -2  11    5.24    0.80
  -4  -2  10  164.84    5.99
  -4  -2  10  176.02    6.13
  -4  -2  10  168.89    7.42
  -4  -2  10  169.95    5.45
  -4  -2   9  108.75    4.50
  -4  -2   9  117.99    4.67
  -4  -2   9  121.80    5.84
  -4  -2   9  123.71    4.23
  -4  -2   8   42.12    2.40
  -4  -2   8   38.44    2.97
  -4  -2   8   46.39    2.24
  -4  -2   8   42.10    2.45
  -4  -2   7   16.46    1.81
  -4  -2   6  665.62   17.47
  -4  -2   5  153.03    5.62
  -4  -2   4  962.07   23.06
  -4  -2   3  317.35    8.78
  -4  -2   2  210.98    6.35
  -4  -2   2  218.19    6.26
  -4  -2   1   17.04    1.18
  -4  -2   1   18.90    1.40
  -4  -2   0    1.04    0.32
   4   2   0    1.41    0.30
  -4  -2   0    0.88    0.40
  -4  -2  -1 1349.49   31.09
   4   2   1 1351.71   30.19
   4   2   2  269.60    6.96
  -4  -2  -2  287.09    8.04
   4   2   3  847.41   19.30
  -4  -2  -3  870.09   20.65
  -4  -2  -4  753.09   19.07
   4   2   4  792.95   17.85
  -4  -2  -5  475.40   12.63
  -4  -2  -6    0.48    0.35
  -4  -2  -7  324.39    9.31
  -4  -2  -8    6.13    0.74
   4   2   9    0.22    0.44
  -4  -2  -9    0.28    0.31
  -4  -2 -10   92.33    3.44
   4   2  10   83.11    3.66
   4   2  11    8.21    1.12
  -4  -2 -11    7.40    0.92
   4   2  12   15.23    1.45
  -4  -2 -12   16.77    1.34
   4   2  13  103.40    4.05
  -4  -2 -13   99.96    3.72
   4   2  14   35.47    2.14
   4   2  15   22.82    1.61
   4   2  16   70.55    2.86
   4   2  17   16.67    1.13
  -4  -3  16    5.34    0.71
  -4  -3  16    4.08    0.59
  -4  -3  15  225.41    6.60
  -4  -3  15  214.06    6.66
  -4  -3  14    3.48    0.80
  -4  -3  14    3.31    0.71
  -4  -3  13  201.32    6.70
  -4  -3  13  205.92    6.91
  -4  -3  12   50.89    2.87
  -4  -3  12   55.04    3.09
  -4  -3  12   50.00    2.47
  -4  -3  11   90.81    4.09
  -4  -3  11   98.54    4.33
  -4  -3  11   95.71    3.71
  -4  -3  10  122.33    4.89
  -4  -3  10  130.94    5.14
  -4  -3  10  124.52    6.41
  -4  -3  10  134.35    4.55
  -4  -3   9    9.52    1.18
  -4  -3   9    8.76    1.15
  -4  -3   9    8.47    1.52
  -4  -3   9    9.23    0.98
  -4  -3   8   16.28    1.46
  -4  -3   8   19.94    1.65
  -4  -3   8   19.63    2.23
  -4  -3   8   18.96    1.37
  -4  -3   7  181.39    5.93
  -4  -3   7  187.45    5.50
  -4  -3   6  153.26    6.16
  -4  -3   5  110.26    4.73
  -4  -3   4  313.26    9.27
  -4  -3   3 1644.21   37.65
  -4  -3   2    5.63    0.79
  -4  -3   1  205.38    6.10
   4   3   0    1.92    0.50
  -4  -3   0    1.96    0.53
  -4  -3   0    2.59    0.49
   4   3   1  122.43    4.12
  -4  -3  -1  121.10    4.34
   4   3   2 2535.47   56.18
  -4  -3  -2 2581.07   56.89
  -4  -3  -3  764.51   18.88
   4   3   3  785.59   18.22
  -4  -3  -4  855.15   21.06
   4   3   4  889.90   20.33
   4   3   5  126.87    4.06
  -4  -3  -5  113.99    4.43
   4   3   6  310.78    8.25
  -4  -3  -6  294.13    8.65
  -4  -3  -7   23.10    1.69
  -4  -3  -8   28.21    1.66
   4   3   9   30.75    1.95
  -4  -3  -9   35.11    1.92
   4   3  10   53.90    2.74
  -4  -3 -10   60.80    2.70
   4   3  11    9.22    1.14
  -4  -3 -11   10.56    1.12
   4   3  12  216.00    6.71
  -4  -3 -12  218.16    6.55
   4   3  13   26.85    1.83
  -4  -3 -13   25.55    1.68
   4   3  14   19.45    1.52
  -4  -3 -14   20.85    1.44
   4   3  15  198.75    6.03
   4   3  16   40.44    2.00
   4   3  17   21.03    1.25
  -4  -4  16  124.27    4.06
  -4  -4  15   46.58    2.19
  -4  -4  15   46.68    2.42
  -4  -4  14   75.22    3.17
  -4  -4  14   69.02    3.30
  -4  -4  13  129.34    4.74
  -4  -4  13  124.89    4.98
  -4  -4  12   20.25    1.68
  -4  -4  12   20.90    1.88
  -4  -4  12   17.86    1.41
  -4  -4  11  194.44    6.59
  -4  -4  11  200.09    6.96
  -4  -4  11  201.98    6.16
  -4  -4  10   51.38    2.79
  -4  -4  10   50.12    2.95
  -4  -4  10   52.00    4.10
  -4  -4  10   51.61    2.54
  -4  -4   9    2.35    0.60
  -4  -4   9    4.13    0.83
  -4  -4   9    1.83    0.85
  -4  -4   8  709.17   18.60
  -4  -4   8  709.22   20.69
  -4  -4   7  114.59    3.83
  -4  -4   7  111.89    4.37
  -4  -4   7  109.18    5.48
  -4  -4   7  108.57    3.74
  -4  -4   7  118.32    3.98
  -4  -4   6  244.10    8.68
  -4  -4   5    2.51    0.68
  -4  -4   4  191.93    6.78
  -4  -4   3  156.62    5.65
  -4  -4   2 1086.38   25.77
  -4  -4   1  137.16    4.77
   4   4  -1  136.71    4.90
   4   4   0    3.66    0.67
   4   4   1  210.96    6.49
   4   4   2  295.88    8.29
   4   4   3  549.89   13.71
  -4  -4  -3  541.39   13.98
   4   4   4   77.04    3.14
  -4  -4  -4   67.59    3.17
   4   4   5    1.35    0.46
  -4  -4  -5    1.36    0.51
   4   4   6  201.36    6.27
   4   4   7   30.05    1.97
   4   4   8  471.84   12.76
  -4  -4  -8  479.55   12.13
   4   4   9   64.09    2.87
  -4  -4  -9   64.47    2.85
   4   4  10   11.52    1.17
  -4  -4 -10   12.40    1.20
   4   4  11  422.77   11.12
  -4  -4 -11  417.66   11.12
  -4  -4 -12    0.50    0.41
   4   4  12   -0.24    0.52
   4   4  13  150.21    5.01
  -4  -4 -13  143.06    4.88
   4   4  14   53.06    2.58
  -4  -4 -14   56.26    2.54
   4   4  15   13.67    1.18
   4   4  16   37.86    1.87
   4   4  17   94.87    3.09
  -4  -4 -17   97.46    3.42
  -4  -5  16   26.26    1.49
  -4  -5  15   53.92    2.55
  -4  -5  14   27.68    1.92
  -4  -5  13    0.06    0.44
  -4  -5  13    0.33    0.34
  -4  -5  12   25.58    2.05
  -4  -5  12   22.90    1.57
  -4  -5  11    1.07    0.55
  -4  -5  11    0.83    0.42
  -4  -5  10  127.66    5.18
  -4  -5  10  129.63    7.00
  -4  -5  10  133.14    4.59
  -4  -5   9  160.05    6.00
  -4  -5   9  161.59    7.81
  -4  -5   9  171.13    5.41
  -4  -5   8   51.37    2.90
  -4  -5   8   46.97    3.78
  -4  -5   8   52.36    2.45
  -4  -5   8   53.92    2.52
  -4  -5   7  447.88   12.54
  -4  -5   7  440.29   14.51
  -4  -5   7  474.28   11.84
  -4  -5   7  489.43   12.02
  -4  -5   7  481.09   11.86
  -4  -5   6   10.02    1.13
  -4  -5   6   11.17    1.00
  -4  -5   6   10.21    1.57
  -4  -5   6   10.18    0.92
  -4  -5   6   10.92    1.00
  -4  -5   5  228.80    8.33
  -4  -5   4  220.86    7.81
  -4  -5   3    0.88    0.47
  -4  -5   2   33.27    2.28
   4   5  -1    7.62    1.05
  -4  -5   1    5.88    0.91
   4   5   0  141.61    5.21
   4   5   1   -0.25    0.38
   4   5   2   76.32    3.43
   4   5   3   88.91    3.74
   4   5   4  141.40    5.07
   4   5   5   27.56    1.92
   4   5   6   16.39    1.50
   4   5   7  393.70   11.13
  -4  -5  -7  402.81   10.51
   4   5   8   41.64    2.62
  -4  -5  -8   44.29    2.33
  -4  -5  -9    9.97    1.10
  -4  -5 -10  462.03   12.13
  -4  -5 -11   62.16    2.97
   4   5  12   35.14    2.01
  -4  -5 -12   32.45    2.04
  -4  -5 -13    1.11    0.44
   4   5  13    1.29    0.48
   4   5  14  123.16    4.25
  -4  -5 -14  122.67    4.28
   4   5  15   16.24    1.23
  -4  -5 -15   16.58    1.20
  -4  -5 -17    2.84    0.52
  -4  -6  16   38.28    1.73
  -4  -6  15   12.95    1.13
  -4  -6  14   16.27    1.40
  -4  -6  13    0.24    0.46
  -4  -6  13    0.05    0.29
  -4  -6  12    5.78    1.00
  -4  -6  12    5.43    0.77
  -4  -6  11  151.68    5.80
  -4  -6  11  155.29    5.10
  -4  -6  10    0.45    0.53
  -4  -6  10    1.04    0.46
  -4  -6   9  209.13    7.18
  -4  -6   9  201.47    9.22
  -4  -6   9  219.55    6.53
  -4  -6   8  219.93    7.46
  -4  -6   8  214.39    9.44
  -4  -6   8  237.59    6.92
  -4  -6   8  243.56    6.95
  -4  -6   7  169.47    6.05
  -4  -6   7  162.59    7.74
  -4  -6   7  184.66    5.60
  -4  -6   7  183.34    5.57
  -4  -6   7  179.20    5.60
  -4  -6   6  166.33    5.04
  -4  -6   6  151.20    5.47
  -4  -6   6  149.17    6.99
  -4  -6   6  163.40    5.03
  -4  -6   6  162.00    5.07
  -4  -6   6  160.81    5.12
  -4  -6   5   22.86    1.68
  -4  -6   5   23.44    1.46
  -4  -6   5   21.85    2.29
  -4  -6   5   23.54    1.51
  -4  -6   5   24.39    1.47
  -4  -6   4    0.06    0.69
  -4  -6   3    5.87    1.09
   4   6  -2    4.66    0.99
  -4  -6   2    7.16    1.13
   4   6  -1    9.52    1.33
   4   6   0    4.81    0.93
   4   6   1  502.12   13.70
   4   6   2  104.86    4.44
   4   6   3   81.82    3.77
   4   6   4  375.72   10.79
   4   6   5  109.08    4.58
   4   6   6   67.34    3.43
  -4  -6  -6   62.74    2.84
   4   6   7    2.25    0.70
  -4  -6  -7    2.21    0.60
   4   6   8  211.80    7.44
  -4  -6  -8  218.46    6.73
   4   6   9  272.15    9.00
  -4  -6  -9  274.62    8.09
  -4  -6 -10    2.39    0.68
  -4  -6 -11  330.91    9.43
  -4  -6 -12   34.83    2.16
  -4  -6 -13    8.52    1.05
  -4  -6 -14    0.90    0.42
  -4  -6 -15   11.87    1.03
  -4  -6 -15   11.83    1.26
  -4  -6 -16    1.16    0.46
   4   6  16    0.66    0.33
  -4  -6 -17   11.10    0.91
  -4  -7  15    6.11    0.73
  -4  -7  14   59.76    2.72
  -4  -7  13   72.65    3.28
  -4  -7  13   65.49    2.64
  -4  -7  12    0.42    0.45
  -4  -7  12    1.02    0.44
  -4  -7  11    6.24    1.03
  -4  -7  11    7.85    0.92
  -4  -7  10  126.42    5.16
  -4  -7  10  130.16    4.55
  -4  -7   9   15.18    1.62
  -4  -7   9   16.34    1.38
  -4  -7   8  383.71   11.49
  -4  -7   8  385.90   14.15
  -4  -7   8  417.09   10.95
  -4  -7   8  427.79   10.94
  -4  -7   7  115.92    4.86
  -4  -7   7  118.40    6.66
  -4  -7   7  136.36    4.61
  -4  -7   7  131.28    4.47
  -4  -7   7  133.26    4.52
  -4  -7   7  127.93    4.51
  -4  -7   6  125.00    4.21
  -4  -7   6  115.63    4.62
  -4  -7   6  110.95    6.12
  -4  -7   6  123.16    4.26
  -4  -7   6  123.69    4.26
  -4  -7   5   17.21    1.50
  -4  -7   5   21.02    1.41
  -4  -7   5   19.95    2.33
  -4  -7   5   19.84    1.42
  -4  -7   5   19.73    1.40
  -4  -7   4  132.14    4.33
  -4  -7   4  136.04    4.30
  -4  -7   4  129.74    4.39
  -4  -7   4  128.06    6.04
  -4  -7   3   35.24    1.85
   4   7  -3   40.04    3.05
  -4  -7   3   35.96    2.80
  -4  -7   3   36.72    1.94
   4   7  -2  438.74   13.23
   4   7  -1   22.38    2.13
   4   7   0  399.44   11.96
   4   7   1  179.89    6.70
   4   7   2  489.51   13.71
   4   7   3   99.10    4.50
   4   7   4    4.54    0.97
   4   7   5    8.21    1.27
  -4  -7  -5    8.23    0.97
   4   7   6  211.77    7.25
  -4  -7  -6  184.58    6.07
   4   7   7  210.92    7.43
  -4  -7  -7  194.76    6.37
   4   7   8   48.00    3.17
  -4  -7  -8   44.48    2.59
  -4  -7  -8   46.11    2.57
  -4  -7  -9    2.18    0.69
  -4  -7  -9    3.42    0.85
   4   7  10   21.35    2.16
  -4  -7 -10   15.96    1.64
  -4  -7 -10   21.55    1.77
  -4  -7 -11  167.71    6.58
  -4  -7 -11  215.41    6.59
  -4  -7 -12   49.26    3.04
  -4  -7 -12   53.85    2.81
  -4  -7 -13   74.39    3.75
  -4  -7 -13   79.98    3.41
  -4  -7 -14    0.56    0.42
  -4  -7 -14    1.21    0.58
  -4  -7 -15    9.46    0.91
  -4  -7 -15   10.93    1.18
   4   7  15   10.28    1.01
  -4  -7 -16    3.38    0.62
   4   7  16    3.72    0.53
  -4  -8  15   16.97    1.06
  -4  -8  14    1.08    0.40
  -4  -8  13   59.81    2.77
  -4  -8  13   57.32    2.29
  -4  -8  12    0.60    0.50
  -4  -8  12    0.17    0.29
  -4  -8  11    2.32    0.69
  -4  -8  11    2.73    0.59
  -4  -8  10   51.45    2.51
  -4  -8  10   49.35    2.90
  -4  -8   9  318.41    9.95
  -4  -8   9  353.33    9.40
  -4  -8   8    8.34    1.20
  -4  -8   8   10.34    1.17
  -4  -8   8    9.07    1.07
  -4  -8   7  130.92    5.25
  -4  -8   7  135.67    7.31
  -4  -8   7  147.93    5.01
  -4  -8   7  140.20    4.79
  -4  -8   7  144.26    4.91
  -4  -8   6   15.17    1.49
   4   8  -6   14.93    2.18
  -4  -8   6   17.76    2.49
  -4  -8   6   17.11    1.40
  -4  -8   6   16.86    1.36
  -4  -8   6   16.81    1.36
  -4  -8   5   84.97    3.76
  -4  -8   5   90.77    3.41
  -4  -8   5   91.67    3.56
   4   8  -5   89.74    5.45
  -4  -8   5   82.95    5.20
  -4  -8   5   93.61    3.55
  -4  -8   4   23.54    1.57
  -4  -8   4   23.63    1.72
   4   8  -4   24.52    2.63
  -4  -8   4   25.06    1.55
  -4  -8   4   24.63    2.62
  -4  -8   4   23.80    1.61
  -4  -8   3  250.35    7.17
   4   8  -3  248.63    9.57
  -4  -8   3  256.23    7.05
  -4  -8   3  261.26    7.32
  -4  -8   2    1.59    0.44
   4   8  -2    1.96    0.93
  -4  -8   2    2.00    0.51
  -4  -8   2    2.93    0.63
  -4  -8   1 1089.47   24.90
  -4  -8   1 1083.16   25.15
   4   8  -1 1112.45   27.92
  -4  -8   1 1082.63   25.18
   4   8   0    1.56    0.76
  -4  -8   0    1.86    0.48
  -4  -8   0    2.09    0.55
   4   8   1  601.86   16.72
   4   8   2   23.56    2.20
   4   8   3    4.56    0.98
   4   8   4   18.49    1.93
  -4  -8  -4   17.86    1.43
   4   8   5   37.52    2.82
  -4  -8  -5   35.48    2.12
   4   8   6   78.60    4.15
  -4  -8  -6   66.81    3.19
   4   8   7   24.66    2.31
  -4  -8  -7   24.54    1.97
   4   8   8   19.57    2.03
  -4  -8  -8   17.29    1.60
  -4  -8  -8   18.60    1.67
   4   8   9  124.75    5.69
  -4  -8  -9  110.24    4.71
  -4  -8  -9  122.11    4.81
  -4  -8 -10  169.09    6.39
  -4  -8 -10  195.32    6.44
  -4  -8 -11   28.47    2.24
  -4  -8 -11   35.37    2.30
  -4  -8 -12   54.19    3.17
  -4  -8 -12   63.39    3.06
  -4  -8 -13   12.87    1.44
  -4  -8 -13   14.55    1.33
  -4  -8 -14   20.22    1.46
  -4  -8 -14   22.06    1.76
   4   8  14   23.60    1.64
  -4  -8 -15   70.03    3.05
   4   8  15   71.57    2.82
  -4  -8 -16   54.74    2.32
   4   8  16   56.50    2.14
  -4  -9  14   56.26    2.18
  -4  -9  13    5.74    0.77
  -4  -9  13    4.89    0.57
  -4  -9  12   10.41    1.10
  -4  -9  12   10.77    0.93
  -4  -9  11   18.96    1.59
  -4  -9  11   16.32    1.25
  -4  -9  10   99.49    4.18
  -4  -9  10   94.50    3.62
  -4  -9   9    7.69    1.13
  -4  -9   9    7.98    0.99
  -4  -9   8    0.53    0.45
  -4  -9   8    1.14    0.57
  -4  -9   8    0.51    0.39
  -4  -9   7   10.06    1.25
  -4  -9   7   13.77    1.31
  -4  -9   7   10.92    1.12
  -4  -9   7   11.16    1.18
  -4  -9   6   31.32    2.14
   4   9  -6   26.18    3.08
  -4  -9   6   30.96    1.98
  -4  -9   6   28.59    1.86
  -4  -9   5  163.46    5.24
  -4  -9   5  160.90    5.41
   4   9  -5  158.09    7.98
  -4  -9   5  175.63    5.53
  -4  -9   4   24.08    1.55
   4   9  -4   22.68    2.70
  -4  -9   4   20.63    1.56
  -4  -9   4   23.81    1.65
   4   9  -3    1.64    0.86
  -4  -9   3    1.69    0.44
  -4  -9   3    1.06    0.42
  -4  -9   3    1.58    0.49
  -4  -9   2  202.05    6.12
   4   9  -2  206.70    8.53
  -4  -9   2  200.74    5.84
  -4  -9   2  197.01    6.15
  -4  -9   1  291.64    8.07
   4   9  -1  288.22   10.42
  -4  -9   1  291.94    8.15
  -4  -9   1  280.50    7.71
  -4  -9   0 1284.94   29.48
   4   9   0 1319.88   32.73
  -4  -9   0 1314.98   29.91
   4   9   1   18.10    2.09
  -4  -9  -1   16.91    1.36
  -4  -9  -1   17.14    1.25
   4   9   2  246.93    8.94
   4   9   3   37.39    2.90
  -4  -9  -3   39.41    2.16
   4   9   3   41.77    2.11
  -4  -9  -4    0.82    0.49
   4   9   4    0.27    0.54
   4   9   4    0.01    0.29
   4   9   5   11.78    1.66
  -4  -9  -5   12.21    1.30
   4   9   5   12.93    1.24
   4   9   6   69.54    4.07
  -4  -9  -6   62.93    3.17
   4   9   7   31.52    2.72
  -4  -9  -7   27.52    2.05
   4   9   8  305.44   10.23
  -4  -9  -8  287.43    8.72
  -4  -9  -8  280.19    8.81
  -4  -9  -9   21.07    1.84
  -4  -9  -9   24.66    1.99
  -4  -9 -10   24.19    2.02
  -4  -9 -10   30.02    2.18
  -4  -9 -11  111.89    4.46
   4   9  11  106.44    4.40
   4   9  12   23.17    1.81
  -4  -9 -12   20.06    1.67
  -4  -9 -12   18.49    1.71
  -4  -9 -13    3.62    0.71
  -4  -9 -13    3.98    0.82
   4   9  13    3.45    0.74
  -4  -9 -14  146.78    5.12
   4   9  14  155.69    4.96
   4   9  15   19.38    1.27
  -4  -9 -15   18.37    1.33
   4   9  16    0.59    0.25
  -4 -10  12   14.49    1.14
  -4 -10  12   14.49    1.00
  -4 -10  11  124.75    4.31
  -4 -10  11  117.08    3.90
  -4 -10  10   57.80    2.84
  -4 -10  10   59.69    2.59
  -4 -10   9   31.75    2.11
  -4 -10   9   31.02    1.87
  -4 -10   8    8.16    1.10
  -4 -10   8    8.93    1.04
  -4 -10   7   23.16    1.82
  -4 -10   7   25.98    1.83
  -4 -10   7   24.80    1.71
  -4 -10   7   25.27    1.77
  -4 -10   6    4.65    0.82
  -4 -10   6    4.92    0.81
  -4 -10   5   39.32    2.25
  -4 -10   5   40.12    2.28
  -4 -10   4    1.28    0.48
  -4 -10   4    0.26    0.43
  -4 -10   4    0.33    0.38
  -4 -10   3    0.47    0.42
  -4 -10   3    0.97    0.47
  -4 -10   3    1.34    0.55
  -4 -10   2   21.38    1.56
   4  10  -2   20.18    2.47
  -4 -10   2   19.26    1.36
  -4 -10   2   19.49    1.56
  -4 -10   1  109.09    4.05
   4  10  -1  109.95    5.95
  -4 -10   1  108.31    3.76
  -4 -10   1  111.70    4.18
  -4 -10   0   10.72    1.14
   4  10   0   12.40    1.90
  -4 -10   0   12.05    1.04
  -4 -10  -1  226.90    6.39
   4  10   1  223.99    8.78
  -4 -10  -1  220.73    6.76
   4  10   2   82.66    4.72
  -4 -10  -2   79.87    3.40
   4  10   3   22.63    2.35
  -4 -10  -3   22.84    1.68
   4  10   3   25.04    1.63
   4  10   4   54.16    3.68
  -4 -10  -4   49.33    2.63
   4  10   4   51.67    2.55
   4  10   5  102.61    4.07
   4  10   5  107.28    5.47
  -4 -10  -5  112.10    4.40
   4  10   6  298.77   10.31
  -4 -10  -6  284.24    8.79
   4  10   6  300.67    8.65
  -4 -10  -7  382.42   10.51
   4  10   7  392.80   10.67
  -4 -10  -8   15.53    1.48
  -4 -10  -8   12.70    1.47
   4  10   8   15.40    1.51
  -4 -10  -9   38.34    2.47
  -4 -10  -9   45.37    2.76
   4  10   9   39.26    2.50
  -4 -10 -10    5.82    1.03
  -4 -10 -10    5.90    0.97
   4  10  10    7.37    1.08
  -4 -10 -11    6.22    1.00
  -4 -10 -11    5.15    0.90
   4  10  11    5.70    0.96
  -4 -10 -12    3.68    0.76
   4  10  12    3.90    0.78
  -4 -10 -13   66.90    3.10
   4  10  13   72.96    3.09
  -4 -10 -14    2.61    0.57
   4  10  14    1.25    0.41
  -4 -10 -15   13.06    0.98
   4  10  15   13.81    0.96
  -4 -11  12  229.01    5.78
  -4 -11  11   28.94    1.47
  -4 -11  10  418.03   10.47
  -4 -11   9   62.58    2.67
  -4 -11   8   -0.02    0.43
  -4 -11   7    4.69    0.80
  -4 -11   7    3.95    0.68
  -4 -11   7    4.28    0.75
  -4 -11   6   50.72    2.56
  -4 -11   6   51.23    2.62
  -4 -11   5   14.36    1.31
  -4 -11   5   13.82    1.32
  -4 -11   4    0.78    0.47
  -4 -11   4    0.29    0.45
  -4 -11   3    0.38    0.39
  -4 -11   3    0.27    0.43
  -4 -11   3    0.68    0.49
  -4 -11   2    6.49    0.81
  -4 -11   2    6.02    0.89
  -4 -11   2    6.16    0.94
  -4 -11   1  346.97    9.48
   4  11  -1  334.25   12.27
  -4 -11   1  345.39    9.68
  -4 -11   0  239.70    7.19
   4  11   0  243.71    9.67
  -4 -11   0  240.01    7.35
   4  11   1    1.16    0.60
  -4 -11  -1    0.91    0.45
  -4 -11  -2  131.96    4.75
   4  11   2  136.27    6.53
   4  11   3    1.68    0.91
  -4 -11  -3    0.65    0.46
   4  11   3    2.32    0.55
   4  11   4    0.74    0.37
   4  11   5  122.12    4.50
   4  11   6  200.37    6.47
  -4 -11  -7  215.68    6.73
  -4 -11  -7  195.71    6.94
   4  11   7  213.79    6.82
  -4 -11  -8   98.26    4.01
  -4 -11  -8   87.71    4.11
   4  11   8   94.86    4.04
  -4 -11  -9   96.65    4.06
   4  11   9   95.20    4.08
  -4 -11 -10   23.94    1.82
   4  11  10   24.62    1.88
  -4 -11 -11   -0.12    0.41
   4  11  11    0.57    0.44
  -4 -11 -12    8.85    1.03
   4  11  12    9.16    1.06
  -4 -11 -13    1.24    0.39
   4  11  13    1.77    0.48
  -4 -11 -14   -0.14    0.26
   4  11  14    0.11    0.26
  -4 -12  11  324.36    7.83
  -4 -12  10    4.14    0.55
  -4 -12   9   51.61    2.21
  -4 -12   8    0.88    0.42
  -4 -12   7    3.44    0.65
  -4 -12   6   -0.06    0.38
  -4 -12   6    0.19    0.44
  -4 -12   5   26.35    1.77
  -4 -12   5   24.52    1.72
  -4 -12   4    0.06    0.43
  -4 -12   4   -0.30    0.43
  -4 -12   3  399.36   10.85
  -4 -12   3  401.20   10.68
  -4 -12   2   16.40    1.47
  -4 -12   2   13.39    1.28
  -4 -12   1   78.02    3.32
  -4 -12   1   80.60    3.54
  -4 -12   0  106.12    4.04
  -4 -12   0  102.51    4.17
  -4 -12  -1   73.85    3.26
  -4 -12  -1   78.44    3.48
  -4 -12  -2    5.81    0.89
  -4 -12  -3  161.79    5.49
  -4 -12  -4    5.49    0.86
  -4 -12  -5    2.13    0.61
   4  12   5    2.51    0.63
   4  12   6  102.01    4.03
   4  12   7  189.47    6.20
  -4 -12  -8  153.33    5.22
   4  12   8  144.38    5.21
  -4 -12  -9    2.82    0.64
   4  12   9    1.86    0.53
  -4 -12 -10   20.87    1.57
   4  12  10   22.82    1.68
  -4 -12 -11    2.53    0.58
   4  12  11    3.41    0.67
  -4 -12 -12    5.27    0.73
   4  12  12    5.68    0.77
  -4 -12 -13    2.48    0.45
   4  12  13    1.99    0.46
  -4 -13   9   18.00    1.06
  -4 -13   8    2.27    0.43
  -4 -13   7    3.70    0.61
  -4 -13   6   75.84    2.99
  -4 -13   6   79.66    3.12
  -4 -13   5   90.04    3.38
  -4 -13   5   83.13    3.33
  -4 -13   4  309.61    8.45
  -4 -13   4  303.87    8.54
  -4 -13   3  112.51    4.24
  -4 -13   3  113.48    4.07
  -4 -13   2  316.70    8.89
  -4 -13   2  303.76    8.51
  -4 -13   1   23.53    1.75
  -4 -13   1   23.75    1.64
  -4 -13   0   18.98    1.44
  -4 -13   0   17.83    1.55
  -4 -13  -1    0.68    0.46
  -4 -13  -1   -0.10    0.52
  -4 -13  -2   91.64    3.66
  -4 -13  -2   94.73    3.91
  -4 -13  -3    0.71    0.45
  -4 -13  -3    0.99    0.51
  -4 -13  -4   10.74    1.14
  -4 -13  -4   11.56    1.23
  -4 -13  -5    9.75    1.10
  -4 -13  -5   13.41    1.25
  -4 -13  -6    1.59    0.52
  -4 -13  -6    2.25    0.55
  -4 -13  -7  173.60    5.69
  -4 -13  -8    6.93    0.92
  -4 -13  -9   15.16    1.28
  -4 -13  -9   14.99    1.21
  -4 -13 -10   10.27    1.03
  -4 -13 -10   13.16    1.09
  -4 -13 -11   -0.30    0.35
  -4 -13 -12    0.17    0.23
  -4 -14   8    8.25    0.66
  -4 -14   7   -0.16    0.27
  -4 -14   6   48.67    2.11
  -4 -14   5   54.69    2.34
  -4 -14   5   58.26    2.45
  -4 -14   4  138.35    4.37
  -4 -14   4  137.03    4.50
  -4 -14   3   51.53    2.33
  -4 -14   3   52.28    2.46
  -4 -14   2   78.36    3.02
  -4 -14   2   74.77    3.19
  -4 -14   1   20.45    1.55
  -4 -14   1   18.91    1.36
  -4 -14   0    2.25    0.51
  -4 -14   0    3.05    0.69
  -4 -14  -1  101.12    3.71
  -4 -14  -1  111.21    4.15
  -4 -14  -2    6.12    0.79
  -4 -14  -2    6.70    0.93
  -4 -14  -3    9.93    1.02
  -4 -14  -3   11.90    1.20
  -4 -14  -4  128.07    4.44
  -4 -14  -4  139.77    4.73
  -4 -14  -5   14.26    1.22
  -4 -14  -5   15.79    1.30
  -4 -14  -6  134.16    4.67
  -4 -14  -6  160.56    4.77
  -4 -14  -7    1.53    0.49
  -4 -14  -8   34.54    1.84
  -4 -14  -9   28.30    1.57
  -4 -14 -10   19.37    1.19
  -4 -15   6    2.01    0.37
  -4 -15   5  135.99    4.00
  -4 -15   4   64.56    2.48
  -4 -15   4   69.40    2.56
  -4 -15   3   30.52    1.52
  -4 -15   3   32.67    1.69
  -4 -15   2   23.01    1.32
  -4 -15   2   24.89    1.51
  -4 -15   1   18.72    1.20
  -4 -15   1   18.67    1.36
  -4 -15   0    0.34    0.26
  -4 -15   0    0.23    0.33
  -4 -15  -1    3.02    0.53
  -4 -15  -1    3.71    0.67
  -4 -15  -2    1.74    0.43
  -4 -15  -2    1.48    0.49
  -4 -15  -3   62.15    2.50
  -4 -15  -3   65.73    2.79
  -4 -15  -4   28.04    1.53
  -4 -15  -4   30.14    1.72
  -4 -15  -5   65.27    2.56
  -4 -15  -5   71.06    2.71
  -4 -15  -6    0.70    0.30
  -4 -15  -7   11.30    0.88
  -4 -15  -8   28.50    1.37
  -4 -16   3   10.85    0.77
  -4 -16   3   11.10    0.77
  -4 -16   2   16.20    1.03
  -4 -16   2   15.58    0.98
  -4 -16   1    0.19    0.23
  -4 -16   1    0.13    0.23
  -4 -16   0    1.24    0.37
  -4 -16  -1   -0.09    0.28
  -4 -16  -2   13.70    1.04
  -4 -16  -3    1.55    0.39
  -4 -16  -4   74.34    2.63
  -5  12   6   84.56    2.72
  -5  12   5    3.68    0.50
  -5  12   5    2.13    0.38
  -5  12   4   20.10    1.20
  -5  12   4   18.74    1.05
  -5  12   3    4.70    0.62
  -5  12   2   43.38    1.97
  -5  12   1   42.21    1.94
  -5  12   0    6.44    0.72
  -5  12   0    5.53    0.65
  -5  12  -1    0.77    0.30
  -5  12  -2    0.08    0.24
  -5  12  -3   25.62    1.21
  -5  11   9   20.67    1.20
  -5  11   8   37.96    1.79
  -5  11   7  251.92    6.84
  -5  11   6   33.15    1.75
  -5  11   6   31.98    1.60
  -5  11   5  196.73    5.67
  -5  11   5  194.26    5.62
  -5  11   4   27.47    1.55
  -5  11   4   28.27    1.66
  -5  11   3   20.26    1.40
  -5  11   3   19.51    1.25
  -5  11   2   12.29    1.11
  -5  11   1   22.12    1.51
  -5  11   0    7.44    0.89
  -5  11  -1    3.28    0.63
  -5  11  -2   57.01    2.42
  -5  11  -2   58.51    2.52
  -5  11  -3    4.96    0.64
   5 -11   3    4.78    0.66
  -5  11  -4   76.99    2.73
   5 -11   4   81.18    2.79
  -5  11  -5   -0.17    0.24
  -5  10  11    0.10    0.22
  -5  10  10    1.97    0.43
  -5  10   9   31.34    1.71
  -5  10   8    1.89    0.52
  -5  10   7  313.69    8.60
  -5  10   6  180.78    5.77
  -5  10   6  191.34    5.55
  -5  10   5   29.51    1.75
  -5  10   5   30.11    1.84
  -5  10   4   13.76    1.21
  -5  10   4   12.27    1.15
  -5  10   3   28.23    1.72
  -5  10   3   28.53    1.81
  -5  10   2    0.96    0.35
  -5  10   2    1.08    0.50
  -5  10   1   12.24    1.21
  -5  10   1   11.72    1.00
  -5  10   0    2.07    0.56
  -5  10  -1   92.23    3.68
  -5  10  -2    2.58    0.63
   5 -10   2    1.79    0.45
  -5  10  -3   78.64    3.13
   5 -10   3   80.89    3.10
  -5  10  -3   81.01    3.27
  -5  10  -4    9.84    0.94
   5 -10   4   10.24    0.96
  -5  10  -5    2.88    0.52
   5 -10   5    2.07    0.45
  -5  10  -6   37.60    1.69
   5 -10   6   38.13    1.77
   5 -10   7    3.16    0.49
  -5   9  12   11.82    0.83
  -5   9  11   51.80    2.17
  -5   9  10   80.75    3.10
  -5   9   9   31.88    1.89
  -5   9   8   27.42    1.81
  -5   9   7    0.16    0.45
  -5   9   6  155.07    4.95
  -5   9   6  150.42    5.26
  -5   9   5   42.98    2.24
  -5   9   5   40.89    2.34
  -5   9   4   82.19    3.43
  -5   9   4   86.40    3.58
  -5   9   3    5.96    0.86
  -5   9   3    6.47    0.91
  -5   9   2   15.23    1.37
  -5   9   2   15.54    1.31
  -5   9   1   41.85    2.36
  -5   9   1   41.57    2.16
  -5   9   0  398.80   10.81
  -5   9   0  398.01   10.25
  -5   9  -1   37.67    2.26
   5  -9   2  162.65    5.22
  -5   9  -2  160.55    5.46
  -5   9  -3    2.96    0.71
   5  -9   3    2.54    0.54
  -5   9  -4    0.25    0.36
   5  -9   4    0.24    0.31
  -5   9  -5    7.19    0.86
   5  -9   5    5.91    0.76
  -5   9  -6   28.42    1.63
   5  -9   6   28.08    1.64
  -5   9  -7   60.48    2.39
   5  -9   7   64.13    2.53
   5  -9   8    2.00    0.43
   5  -9   9   24.21    1.26
  -5   8  13   26.83    1.22
  -5   8  12   18.14    1.14
  -5   8  11    6.93    0.81
  -5   8  11    7.42    0.92
  -5   8  10    1.16    0.57
  -5   8  10    0.11    0.39
  -5   8   9   14.48    1.45
  -5   8   9   15.10    1.34
  -5   8   8    4.48    0.91
  -5   8   8    4.75    0.84
  -5   8   7  180.92    6.32
  -5   8   7  186.51    6.13
  -5   8   6   30.12    2.20
  -5   8   6   30.00    1.80
  -5   8   6   32.24    2.13
  -5   8   5  261.40    8.10
  -5   8   5  258.07    7.49
  -5   8   5  260.93    7.90
  -5   8   4   74.81    3.51
  -5   8   4   80.44    3.48
  -5   8   4   72.20    3.20
  -5   8   3   26.02    1.84
  -5   8   3   28.56    1.90
  -5   8   2    5.57    0.86
  -5   8   2    5.95    0.84
  -5   8   1   85.98    3.64
  -5   8   1   87.00    3.47
  -5   8   0    6.97    0.92
  -5   8   0    9.45    1.17
  -5   8  -1  637.74   16.08
  -5   8  -2    5.53    0.89
   5  -8   3   98.94    3.76
  -5   8  -3  100.95    4.02
  -5   8  -4    0.33    0.43
  -5   8  -4    1.51    0.50
   5  -8   4    0.69    0.37
  -5   8  -5    3.81    0.72
   5  -8   5    2.95    0.58
  -5   8  -6    0.13    0.34
   5  -8   6    0.10    0.31
  -5   8  -7    5.71    0.73
   5  -8   7    4.76    0.71
  -5   8  -8    6.86    0.74
   5  -8   8    6.11    0.82
   5  -8   8    6.16    0.74
   5  -8   9  112.98    3.67
   5  -8   9  110.23    3.63
   5  -8  10   34.29    1.60
  -5   7  13    2.56    0.51
  -5   7  13    2.69    0.42
  -5   7  12   59.61    2.69
  -5   7  12   55.89    2.33
  -5   7  11   15.47    1.43
  -5   7  11   14.71    1.20
  -5   7  10   32.65    2.19
  -5   7  10   34.36    2.03
  -5   7   9   38.11    2.47
  -5   7   9   40.99    2.33
  -5   7   8   25.27    1.85
  -5   7   8   24.60    2.00
  -5   7   7   10.13    1.29
  -5   7   7    8.53    1.11
  -5   7   6   51.39    2.91
  -5   7   6   52.26    2.81
  -5   7   5  335.52    9.78
  -5   7   5  334.34    9.58
  -5   7   4   38.78    2.40
  -5   7   4   35.23    2.06
  -5   7   4   38.61    2.31
  -5   7   3   89.74    3.81
  -5   7   3   85.79    3.54
  -5   7   3   85.93    3.64
  -5   7   2   16.47    1.48
  -5   7   2   15.37    1.35
  -5   7   2   15.86    1.39
  -5   7   1  169.86    5.69
  -5   7   1  173.59    5.60
  -5   7   1  182.87    7.41
  -5   7   0  454.61   14.04
  -5   7   0  442.90   11.71
  -5   7   0  432.85   11.39
  -5   7  -1   60.81    2.73
  -5   7  -1   65.90    4.38
  -5   7  -1   67.23    3.09
  -5   7  -2  487.23   12.77
  -5   7  -3   46.72    2.55
  -5   7  -4   33.97    2.07
   5  -7   4   31.89    1.90
  -5   7  -4   32.98    2.10
  -5   7  -5   16.07    1.40
   5  -7   5   13.00    1.20
  -5   7  -6   39.25    2.18
   5  -7   6   37.68    2.09
  -5   7  -7    7.96    0.99
   5  -7   7    6.90    0.90
  -5   7  -8   31.61    1.78
   5  -7   8   31.61    1.81
   5  -7   9    5.85    0.87
   5  -7   9    6.73    0.80
   5  -7  10   75.43    2.97
   5  -7  10   77.11    2.87
   5  -7  11   32.63    1.58
   5  -7  11   28.33    1.48
   5  -7  12    0.01    0.25
  -5   6  14    4.71    0.61
  -5   6  13   66.21    2.77
  -5   6  13   63.91    2.35
  -5   6  12    1.96    0.56
  -5   6  12    1.97    0.47
  -5   6  11  112.60    4.42
  -5   6  11  114.12    4.05
  -5   6  10   14.98    1.51
  -5   6  10   15.27    1.35
  -5   6   9  205.56    6.96
  -5   6   9  211.59    6.62
  -5   6   8    1.57    0.64
  -5   6   8    0.75    0.47
  -5   6   7   83.53    3.87
  -5   6   7   85.01    3.70
  -5   6   6    6.64    1.01
  -5   6   6    7.13    1.04
  -5   6   5   73.78    3.47
  -5   6   5   71.69    3.33
  -5   6   4   51.48    2.78
  -5   6   4   54.48    2.79
  -5   6   3   66.25    3.15
  -5   6   3   66.08    2.95
  -5   6   3   70.03    3.16
  -5   6   2    1.37    0.70
  -5   6   2    1.36    0.58
  -5   6   2    1.31    0.48
  -5   6   2    1.24    0.53
  -5   6   1   90.59    3.62
  -5   6   1   90.44    4.72
  -5   6   1   88.67    3.54
  -5   6   1   83.98    3.47
  -5   6   0  162.40    6.88
  -5   6   0  155.09    5.23
  -5   6   0  155.98    5.10
  -5   6  -1  348.59   11.80
  -5   6  -1  358.21    9.73
  -5   6  -1  351.60    9.40
  -5   6  -2  237.51    9.22
  -5   6  -2  239.46    7.19
  -5   6  -2  236.13    6.79
  -5   6  -3   56.35    4.09
  -5   6  -3   65.02    3.00
  -5   6  -4   56.81    2.74
  -5   6  -4   49.12    3.85
  -5   6  -4   52.84    2.71
  -5   6  -5   12.15    1.21
   5  -6   5   10.23    1.05
  -5   6  -6   33.22    2.02
   5  -6   6   31.58    1.90
  -5   6  -7    0.55    0.45
   5  -6   7    0.84    0.39
  -5   6  -8  103.33    3.83
   5  -6   8  104.48    3.84
  -5   6  -9  128.51    4.16
   5  -6   9  114.49    4.12
   5  -6  10   93.00    3.83
   5  -6  10   99.26    3.53
   5  -6  11    0.59    0.47
   5  -6  11   -0.18    0.30
   5  -6  12   16.11    1.12
   5  -6  12   14.30    1.02
   5  -6  13    4.34    0.53
  -5   5  15    7.15    0.65
  -5   5  14    7.78    0.81
  -5   5  13    3.96    0.70
  -5   5  13    4.10    0.74
  -5   5  12  141.59    5.07
  -5   5  12  149.18    4.53
  -5   5  11    0.34    0.60
  -5   5  11    1.18    0.68
  -5   5  11    1.34    0.52
  -5   5  10  536.94   14.24
  -5   5  10  535.55   13.63
  -5   5  10  529.31   14.51
  -5   5   9    1.65    0.70
  -5   5   9    1.29    0.59
  -5   5   9    2.34    0.63
  -5   5   8  181.60    6.46
  -5   5   8  189.96    6.22
  -5   5   8  200.57    6.79
  -5   5   7  123.50    4.91
  -5   5   7  128.00    4.76
  -5   5   7  134.17    5.15
  -5   5   6   18.45    1.63
  -5   5   6   16.53    1.48
  -5   5   5   33.28    2.15
  -5   5   5   33.16    2.09
  -5   5   4  236.77    7.40
  -5   5   4  254.62    7.45
  -5   5   3    4.87    0.81
  -5   5   3    2.79    0.79
  -5   5   3    4.94    0.81
  -5   5   2    3.18    0.68
  -5   5   2    2.51    0.83
  -5   5   2    2.02    0.48
  -5   5   2    3.20    0.64
  -5   5   1  153.95    5.13
  -5   5   1  162.35    6.52
  -5   5   1  158.02    5.11
  -5   5   1  157.45    5.13
  -5   5   0  123.77    4.24
  -5   5   0  116.71    5.50
  -5   5   0  116.02    4.19
  -5   5   0  116.30    4.12
  -5   5  -1  119.41    5.74
  -5   5  -1  123.11    4.32
  -5   5  -1  119.40    4.12
  -5   5  -2   10.56    1.09
  -5   5  -2    7.99    1.43
  -5   5  -2    8.84    0.90
  -5   5  -3  267.25    9.97
  -5   5  -3  274.92    7.93
  -5   5  -3  277.48    7.53
  -5   5  -4  143.82    4.86
  -5   5  -4  138.21    4.84
  -5   5  -5   48.35    2.50
  -5   5  -5   52.86    3.93
  -5   5  -6    2.12    0.61
   5  -5   6    1.48    0.49
  -5   5  -7  301.35    8.46
   5  -5   7  294.64    8.26
  -5   5  -8  204.62    6.25
   5  -5   8  202.24    6.19
  -5   5  -9  298.27    8.24
   5  -5   9  299.07    8.27
  -5   5 -10    1.47    0.44
   5  -5  10    1.73    0.52
   5  -5  11   33.24    2.09
   5  -5  11   31.24    1.76
   5  -5  12    3.91    0.72
   5  -5  12    3.44    0.55
   5  -5  13   44.50    1.99
   5  -5  13   39.45    1.80
   5  -5  14   43.81    1.77
  -5   4  15    2.90    0.47
  -5   4  15    2.88    0.59
  -5   4  14    5.89    0.76
  -5   4  14    5.30    0.86
  -5   4  13   18.26    1.46
  -5   4  13   17.07    1.56
  -5   4  12    6.21    0.96
  -5   4  12    5.03    0.97
  -5   4  11  747.99   18.30
  -5   4  11  723.80   17.40
  -5   4  11  695.51   18.65
  -5   4  10    1.41    0.75
  -5   4  10    2.04    0.85
  -5   4  10    1.63    0.58
  -5   4   9  344.04   10.08
  -5   4   9  347.03    9.55
  -5   4   9  343.23   10.40
  -5   4   8   40.65    2.53
  -5   4   8   42.33    2.37
  -5   4   8   43.86    2.75
  -5   4   7    7.99    1.13
  -5   4   7    8.07    1.13
  -5   4   7    7.98    1.01
  -5   4   6   18.74    1.62
  -5   4   6   17.48    1.47
  -5   4   6   22.51    1.82
  -5   4   5   10.09    1.15
  -5   4   5   10.19    1.12
  -5   4   4    1.57    0.58
  -5   4   4    1.78    0.47
  -5   4   3   23.19    1.62
  -5   4   3   23.95    2.04
  -5   4   3   26.46    1.71
  -5   4   2   88.79    3.49
  -5   4   2   99.47    4.55
  -5   4   2   98.13    3.67
  -5   4   1  325.11    8.75
  -5   4   1  331.26   10.32
  -5   4   1  317.19    8.70
  -5   4   1  335.71    8.86
  -5   4   0  102.31    4.91
  -5   4   0  101.24    3.70
  -5   4   0  104.17    3.70
  -5   4  -1    0.12    0.30
  -5   4  -1   -0.39    0.73
  -5   4  -1    0.15    0.34
  -5   4  -2    0.41    0.67
  -5   4  -2    0.37    0.37
  -5   4  -2    0.29    0.31
  -5   4  -3  171.78    7.28
  -5   4  -3  175.55    5.58
  -5   4  -3  179.06    5.31
  -5   4  -4   25.77    1.72
  -5   4  -4   22.85    2.46
  -5   4  -4   29.79    1.83
  -5   4  -5  352.82    9.43
  -5   4  -5  328.01   11.61
  -5   4  -6  172.04    5.55
  -5   4  -6  174.61    7.62
  -5   4  -7  186.09    5.86
   5  -4   7  180.73    5.66
  -5   4  -7  190.31    7.99
  -5   4  -8  515.15   13.26
   5  -4   8  531.25   13.21
  -5   4  -9   14.98    1.28
   5  -4   9   15.06    1.29
  -5   4 -10  103.79    3.70
   5  -4  10  102.24    3.80
   5  -4  11   12.85    1.46
   5  -4  11   10.42    1.04
   5  -4  12   10.98    1.21
   5  -4  12    7.90    0.86
   5  -4  13    0.86    0.50
   5  -4  13    0.34    0.28
   5  -4  14   24.82    1.43
  -5   3  16   27.66    1.53
  -5   3  15  105.35    3.45
  -5   3  15  107.02    3.94
  -5   3  14    8.00    0.90
  -5   3  14    7.73    1.05
  -5   3  13    5.76    0.85
  -5   3  13    5.91    0.99
  -5   3  12   57.41    2.91
  -5   3  12   53.44    3.15
  -5   3  11   25.90    1.99
  -5   3  11   22.70    2.08
  -5   3  10  685.23   16.60
  -5   3  10  672.45   17.90
  -5   3   9   34.12    2.02
  -5   3   9   32.63    2.42
  -5   3   8  141.83    4.91
  -5   3   8  143.47    5.57
  -5   3   7   34.79    2.07
  -5   3   7   35.63    2.38
  -5   3   6   43.97    2.36
  -5   3   6   46.90    2.66
  -5   3   5   32.29    1.96
  -5   3   5   35.01    2.19
  -5   3   4  341.68    9.75
  -5   3   4  315.32    8.87
  -5   3   3   40.63    2.12
  -5   3   3   43.84    2.67
  -5   3   3   40.31    2.14
  -5   3   2  706.17   18.27
  -5   3   2  708.46   17.03
  -5   3   1  159.00    6.11
  -5   3   0  329.55   10.30
  -5   3  -1   42.79    2.97
  -5   3  -2   46.09    2.23
  -5   3  -2   46.70    3.21
  -5   3  -3    0.17    0.53
  -5   3  -3    0.17    0.29
  -5   3  -3    0.23    0.37
  -5   3  -4  451.33   11.44
  -5   3  -4  450.22   11.08
  -5   3  -5    1.19    0.75
  -5   3  -5    0.51    0.34
  -5   3  -6    6.34    1.34
  -5   3  -6    5.95    0.82
  -5   3  -7  125.18    4.36
  -5   3  -7  115.78    5.90
  -5   3  -8  121.50    4.35
   5  -3   8  128.87    4.35
  -5   3  -8  117.67    5.94
  -5   3  -9   70.66    3.02
   5  -3   9   72.95    3.05
  -5   3 -10  141.46    4.65
   5  -3  10  137.21    4.70
  -5   3 -11   40.08    2.02
   5  -3  11   36.24    2.51
   5  -3  11   37.19    2.08
   5  -3  12   21.39    1.78
   5  -3  12   17.34    1.34
   5  -3  13    0.14    0.49
   5  -3  13   -0.05    0.28
   5  -3  14   54.46    2.42
   5  -3  15   42.64    1.88
  -5   2  16    3.81    0.59
  -5   2  15  139.23    4.30
  -5   2  15  142.38    4.85
  -5   2  14    4.93    0.76
  -5   2  14    5.02    0.90
  -5   2  13    2.63    0.62
  -5   2  13    3.26    0.84
  -5   2  12   65.10    3.52
  -5   2  11  139.78    5.67
  -5   2  10   86.58    4.20
  -5   2   9  109.34    3.98
  -5   2   9  107.33    4.72
  -5   2   8   81.86    3.34
  -5   2   8   84.00    3.93
  -5   2   7   98.15    3.76
  -5   2   7  100.21    4.27
  -5   2   6  568.72   14.70
  -5   2   6  633.38   15.48
  -5   2   5  460.41   12.32
  -5   2   5  486.69   12.83
  -5   2   4  164.77    5.69
  -5   2   4  151.59    4.98
  -5   2   4  155.20    5.26
  -5   2   3  401.72   11.29
  -5   2   2  288.36    8.87
  -5   2   1  532.30   14.41
  -5   2   0  191.58    6.85
  -5   2  -1  181.83    6.77
  -5   2  -2  109.31    5.02
  -5   2  -3  906.63   23.38
  -5   2  -4   67.94    2.79
  -5   2  -4   57.54    3.68
  -5   2  -5   83.18    3.26
  -5   2  -5   84.23    4.62
  -5   2  -5   85.12    3.05
  -5   2  -6   73.54    3.03
  -5   2  -6   71.42    4.29
  -5   2  -7  510.09   12.87
  -5   2  -7  509.01   15.21
  -5   2  -8  287.23    7.94
  -5   2  -8  267.10    9.77
  -5   2  -9  171.51    5.48
   5  -2   9  179.41    5.58
  -5   2 -10   34.22    1.92
   5  -2  10   33.97    2.00
  -5   2 -11   22.80    1.51
   5  -2  11   21.69    1.57
   5  -2  12    0.99    0.73
  -5   2 -12    1.85    0.47
   5  -2  13   43.92    2.42
   5  -2  14   43.56    2.23
   5  -2  15    2.27    0.51
   5  -2  16   97.55    3.08
  -5   1  16   16.76    1.22
  -5   1  15   37.92    1.85
  -5   1  15   42.28    2.27
  -5   1  14    0.68    0.40
  -5   1  14    0.98    0.55
  -5   1  13    0.91    0.60
  -5   1  12   38.20    2.62
  -5   1  11   21.22    1.96
  -5   1  11   22.17    1.77
  -5   1  10    0.10    0.42
  -5   1  10    0.40    0.49
  -5   1  10   -0.29    0.82
  -5   1   9   46.21    2.88
  -5   1   9   47.09    2.66
  -5   1   9   50.60    3.50
  -5   1   8  277.78    8.27
  -5   1   8  279.42    9.47
  -5   1   8  276.68    7.77
  -5   1   8  285.68    8.76
  -5   1   7  309.88    8.78
  -5   1   7  314.23    9.85
  -5   1   7  297.58    8.38
  -5   1   7  311.62    9.16
  -5   1   6  160.73    5.28
  -5   1   6  166.30    6.03
  -5   1   6  148.79    4.99
  -5   1   6  160.65    5.56
  -5   1   5  315.81    8.81
  -5   1   5  284.18    8.49
  -5   1   4   86.25    3.74
  -5   1   3 1077.00   25.78
  -5   1   2   22.46    1.82
  -5   1   1  175.93    6.22
  -5   1   0    1.93    0.68
  -5   1  -1  846.39   21.38
  -5   1  -2  158.95    6.18
  -5   1  -3  136.29    5.71
  -5   1  -4    8.20    1.31
  -5   1  -5  149.50    4.75
  -5   1  -5  139.94    6.10
  -5   1  -6  189.66    5.72
  -5   1  -6  182.70    7.29
  -5   1  -6  188.09    5.43
  -5   1  -7  203.77    6.11
  -5   1  -7  206.12    7.80
  -5   1  -8    0.44    0.43
  -5   1  -8    2.54    1.00
  -5   1  -9    3.12    0.64
   5  -1   9    2.79    0.64
  -5   1 -10  538.35   13.25
   5  -1  10  516.15   13.35
   5  -1  11   16.67    1.40
  -5   1 -11   16.70    1.32
   5  -1  12   19.09    1.74
   5  -1  12   15.71    1.34
  -5   1 -12   20.59    1.41
   5  -1  13    4.37    0.87
   5  -1  14   41.83    2.23
   5  -1  15   93.88    3.40
   5  -1  16    9.04    0.80
  -5   0  16    8.45    0.85
  -5   0  15    8.65    0.85
  -5   0  15    6.87    0.92
  -5   0  14    9.00    0.99
  -5   0  14   13.13    1.40
  -5   0  13   65.46    3.10
  -5   0  13   67.23    3.44
  -5   0  12   12.70    1.50
  -5   0  12   15.15    1.48
  -5   0  11   36.49    2.58
  -5   0  11   40.27    2.52
  -5   0  10   43.00    2.78
  -5   0  10   42.37    2.60
  -5   0  10   44.68    3.45
  -5   0   9   22.76    1.96
  -5   0   9   23.56    1.90
  -5   0   9   25.07    2.56
  -5   0   8   19.67    1.78
  -5   0   8   22.88    1.78
  -5   0   8   20.48    2.11
  -5   0   7  367.62   10.31
  -5   0   7  370.41   11.40
  -5   0   7  376.90   10.54
  -5   0   6    8.72    1.04
  -5   0   6    8.93    1.23
  -5   0   6   10.70    1.20
  -5   0   5  153.49    5.60
  -5   0   4  624.70   15.74
  -5   0   4  614.71   15.63
  -5   0   3    3.06    0.69
  -5   0   2  887.91   21.69
  -5   0   1   74.22    3.53
  -5   0   0    2.80    0.77
  -5   0  -1    1.65    0.64
  -5   0  -2  162.40    6.12
  -5   0  -3   73.70    3.84
  -5   0  -4  251.70    8.48
  -5   0  -5   16.71    1.82
  -5   0  -6  446.36   11.21
  -5   0  -6  426.36   12.93
  -5   0  -6  438.13   10.90
  -5   0  -7    7.94    0.89
  -5   0  -7    7.89    1.27
  -5   0  -7    9.08    0.92
  -5   0  -8   10.16    1.02
  -5   0  -8    8.64    1.37
  -5   0  -9    2.74    0.58
  -5   0 -10  168.25    5.31
   5   0  10  165.14    5.42
   5   0  11   89.06    3.59
   5   0  11   83.62    3.94
  -5   0 -11   94.06    3.53
   5   0  12   47.66    2.72
  -5   0 -12   43.47    2.21
   5   0  13   21.52    1.72
  -5   0 -13   21.83    1.44
   5   0  14   11.62    1.17
   5   0  15   29.47    1.71
   5   0  16   91.40    3.12
  -5  -1  16   79.03    2.90
  -5  -1  15   18.30    1.29
  -5  -1  15   20.47    1.50
  -5  -1  14  226.24    6.93
  -5  -1  14  240.22    7.30
  -5  -1  13   57.18    3.08
  -5  -1  13   53.92    2.87
  -5  -1  12  307.24    9.44
  -5  -1  12  309.32    9.28
  -5  -1  11   18.18    1.78
  -5  -1  11   22.02    1.86
  -5  -1  10  220.17    7.50
  -5  -1  10  226.98    7.48
  -5  -1  10  222.40    8.90
  -5  -1   9  278.64    8.71
  -5  -1   9  277.35    8.58
  -5  -1   9  279.64   10.04
  -5  -1   8  123.26    4.91
  -5  -1   8  133.43    5.01
  -5  -1   8  123.05    5.83
  -5  -1   7  116.59    4.53
  -5  -1   7  115.46    4.51
  -5  -1   7  115.93    5.31
  -5  -1   7  110.75    4.07
  -5  -1   6    0.71    0.45
  -5  -1   6    0.61    0.42
  -5  -1   6    0.46    0.54
  -5  -1   6    0.79    0.40
  -5  -1   5   10.29    1.32
  -5  -1   4    4.00    0.78
  -5  -1   4    3.32    0.70
  -5  -1   3  365.48   10.39
  -5  -1   3  384.40   10.18
  -5  -1   2  624.08   15.94
  -5  -1   1   20.34    1.71
  -5  -1   0  236.68    7.55
  -5  -1  -1  450.76   12.47
  -5  -1  -2  351.62   10.40
  -5  -1  -3  740.51   19.10
  -5  -1  -4    2.60    0.79
  -5  -1  -5  486.97   13.79
  -5  -1  -6   17.66    1.30
  -5  -1  -6   18.09    1.86
  -5  -1  -7  299.71    8.09
  -5  -1  -7  294.24    9.54
  -5  -1  -7  292.18    7.85
  -5  -1  -8    1.26    0.45
  -5  -1  -8    1.39    0.59
  -5  -1  -9   32.75    1.88
  -5  -1 -10   43.14    2.24
   5   1  11   83.04    3.82
  -5  -1 -11   88.47    3.45
   5   1  12    0.23    0.59
  -5  -1 -12    0.43    0.41
   5   1  13   10.01    1.17
  -5  -1 -13   11.51    1.06
   5   1  14    0.60    0.50
   5   1  15    8.65    0.91
   5   1  16   66.23    2.54
  -5  -2  16    0.18    0.25
  -5  -2  16   -0.17    0.28
  -5  -2  15   75.21    3.00
  -5  -2  15   78.01    3.09
  -5  -2  14  225.82    6.93
  -5  -2  14  226.55    6.94
  -5  -2  13  284.40    8.57
  -5  -2  13  283.09    8.57
  -5  -2  12   49.70    2.89
  -5  -2  12   51.01    2.94
  -5  -2  11    0.91    0.62
  -5  -2  11    4.64    0.88
  -5  -2  10  179.40    6.41
  -5  -2  10  180.71    6.52
  -5  -2  10  186.42    8.09
  -5  -2   9  116.78    4.81
  -5  -2   9  123.41    4.99
  -5  -2   9  120.48    6.17
  -5  -2   9  125.35    4.49
  -5  -2   8   33.50    2.26
  -5  -2   8   34.99    2.35
  -5  -2   8   34.94    2.99
  -5  -2   8   36.61    2.08
  -5  -2   7    7.95    1.09
  -5  -2   7    6.86    0.96
  -5  -2   7    8.65    1.42
  -5  -2   7    7.73    0.93
  -5  -2   7    7.02    0.79
  -5  -2   6   50.87    2.65
  -5  -2   6   45.54    3.08
  -5  -2   6   45.35    2.25
  -5  -2   5  320.63    9.90
  -5  -2   4   50.62    2.88
  -5  -2   3  342.56    9.66
  -5  -2   2    0.56    0.51
  -5  -2   2    2.08    0.52
  -5  -2   1    9.09    1.14
  -5  -2   0    6.07    0.96
  -5  -2  -1  353.05   10.26
  -5  -2  -2   72.26    3.58
  -5  -2  -3  221.85    7.43
  -5  -2  -4   62.90    3.41
  -5  -2  -5   36.11    2.53
  -5  -2  -6  540.17   13.23
  -5  -2  -6  523.61   14.63
  -5  -2  -7  311.08    8.31
  -5  -2  -7  299.64    9.52
  -5  -2  -7  303.12    8.10
  -5  -2  -8   31.75    1.87
  -5  -2  -8   31.25    1.77
  -5  -2  -9   51.00    2.46
  -5  -2 -10   13.10    1.22
   5   2  11   47.31    2.67
  -5  -2 -11   47.76    2.41
  -5  -2 -12    0.73    0.42
   5   2  12    0.93    0.58
   5   2  13   17.30    1.46
  -5  -2 -13   18.55    1.38
   5   2  14   60.74    2.73
  -5  -2 -14   60.64    2.53
   5   2  15   27.13    1.62
   5   2  16    0.50    0.34
  -5  -3  16    0.89    0.32
  -5  -3  15  317.61    8.67
  -5  -3  15  330.48    8.53
  -5  -3  14   15.32    1.40
  -5  -3  14   17.19    1.37
  -5  -3  13  205.51    6.56
  -5  -3  13  202.73    6.74
  -5  -3  12   96.20    4.12
  -5  -3  12   96.80    4.30
  -5  -3  11   93.30    4.11
  -5  -3  11   94.77    4.32
  -5  -3  10   80.34    3.80
  -5  -3  10   84.64    4.05
  -5  -3  10   83.10    3.48
  -5  -3   9    4.16    0.91
  -5  -3   9    3.77    0.78
  -5  -3   9    2.86    1.25
  -5  -3   9    3.94    0.77
  -5  -3   8   53.99    2.83
  -5  -3   8   48.43    2.86
  -5  -3   8   45.02    3.59
  -5  -3   8   49.39    2.50
  -5  -3   7  249.17    7.64
  -5  -3   7  248.20    6.99
  -5  -3   7  276.91    8.14
  -5  -3   7  249.01    9.29
  -5  -3   7  254.76    7.35
  -5  -3   6  208.75    6.60
  -5  -3   6  197.86    5.71
  -5  -3   6  197.96    7.65
  -5  -3   6  195.03    5.97
  -5  -3   5  680.94   16.87
  -5  -3   5  673.19   18.17
  -5  -3   4  152.78    5.85
  -5  -3   3 1058.61   25.57
  -5  -3   2  527.03   13.65
   5   3  -1  251.54    7.60
  -5  -3   1  267.28    8.07
  -5  -3   1  260.34    7.51
   5   3   0   19.30    1.44
  -5  -3   0   17.88    1.62
  -5  -3  -1  124.91    4.89
  -5  -3  -2    0.51    0.42
  -5  -3  -3   79.94    3.81
  -5  -3  -4   96.05    4.31
  -5  -3  -5  173.58    6.31
  -5  -3  -6   74.52    2.95
  -5  -3  -6   66.96    3.53
  -5  -3  -6   68.85    2.75
  -5  -3  -7   51.60    2.42
  -5  -3  -7   47.23    2.86
  -5  -3  -7   48.24    2.24
  -5  -3  -8   56.96    2.55
  -5  -3  -8   58.01    2.67
  -5  -3  -9    5.04    0.77
   5   3  10  141.49    5.15
  -5  -3 -10  152.79    5.04
   5   3  11  104.21    4.10
  -5  -3 -11  103.55    3.94
   5   3  12   62.16    2.94
  -5  -3 -12   63.60    2.86
   5   3  13   35.43    2.05
  -5  -3 -13   32.63    1.89
   5   3  14   11.90    1.11
  -5  -3 -14    9.77    0.95
   5   3  15    7.30    0.82
   5   3  16    7.32    0.72
  -5  -4  16   79.10    2.71
  -5  -4  15    9.78    0.98
  -5  -4  14  207.04    6.47
  -5  -4  13   16.97    1.58
  -5  -4  12   39.49    2.33
  -5  -4  12   41.70    2.64
  -5  -4  11   29.04    2.25
  -5  -4  11   27.01    1.80
  -5  -4  10  128.85    5.30
  -5  -4  10  130.05    4.67
  -5  -4   9   17.10    2.35
  -5  -4   9   17.24    1.45
  -5  -4   8  153.49    5.80
  -5  -4   8  162.25    5.25
  -5  -4   7   22.05    1.48
  -5  -4   7   21.70    1.85
  -5  -4   7   19.57    2.31
  -5  -4   7   21.22    1.41
  -5  -4   7   19.67    1.49
  -5  -4   6 1044.80   24.91
  -5  -4   6 1068.60   23.93
  -5  -4   6 1025.66   26.82
  -5  -4   6  998.63   23.71
  -5  -4   6 1050.98   24.21
  -5  -4   5   49.00    2.64
  -5  -4   5   51.49    2.24
  -5  -4   5   49.76    3.35
  -5  -4   5   47.94    2.30
  -5  -4   4  886.17   22.62
  -5  -4   3   31.37    2.33
   5   4  -2  219.39    7.24
  -5  -4   2  216.89    7.10
   5   4  -1    0.40    0.33
  -5  -4   1    0.21    0.39
   5   4   0   66.31    3.17
   5   4   1    5.27    0.82
   5   4   2  417.96   10.93
  -5  -4  -2  406.15   11.66
   5   4   3    0.19    0.36
  -5  -4  -3    0.59    0.46
  -5  -4  -4  385.74   11.17
  -5  -4  -5  215.80    7.31
  -5  -4  -6   98.08    4.38
  -5  -4  -6  100.92    3.60
  -5  -4  -6  104.44    3.77
  -5  -4  -7    1.79    0.51
  -5  -4  -7    3.11    0.69
  -5  -4  -8   12.74    1.20
   5   4   9   18.74    1.53
  -5  -4  -9   18.79    1.51
   5   4  10   80.98    3.41
  -5  -4 -10   77.59    3.35
   5   4  11  287.77    8.14
  -5  -4 -11  276.81    8.14
   5   4  12  156.61    5.07
  -5  -4 -12  141.74    5.00
   5   4  13   47.06    2.33
  -5  -4 -13   47.38    2.37
   5   4  14   34.95    1.89
  -5  -4 -14   35.08    1.89
   5   4  15  115.44    3.79
  -5  -4 -15  115.54    3.73
   5   4  16   11.04    0.85
  -5  -4 -16   10.37    0.93
  -5  -5  15  172.80    5.20
  -5  -5  14   31.44    1.94
  -5  -5  13    0.91    0.53
  -5  -5  12    5.81    1.04
  -5  -5  12    6.88    0.87
  -5  -5  11   25.55    2.11
  -5  -5  11   26.53    1.77
  -5  -5  10   87.83    4.23
  -5  -5  10   93.99    3.72
  -5  -5   9   31.46    2.38
  -5  -5   9   32.08    2.01
  -5  -5   8   61.32    3.36
  -5  -5   8   67.08    2.98
  -5  -5   7  814.46   18.98
  -5  -5   7  788.96   19.97
  -5  -5   7  755.99   22.21
  -5  -5   7  769.18   18.74
  -5  -5   7  815.14   19.16
  -5  -5   6   59.59    3.12
  -5  -5   6   61.43    2.65
  -5  -5   6   62.84    4.19
  -5  -5   6   62.72    2.60
  -5  -5   6   61.01    2.76
  -5  -5   5  395.40   10.92
  -5  -5   5  410.07   10.21
  -5  -5   5  404.32   12.70
  -5  -5   5  383.00    9.98
  -5  -5   5  395.54   10.33
  -5  -5   4  105.26    4.01
  -5  -5   4   95.33    4.83
  -5  -5   4   96.79    3.45
  -5  -5   4   96.78    3.55
  -5  -5   3  144.50    5.89
   5   5  -2  249.86    8.24
  -5  -5   2  239.32    7.98
   5   5  -1    0.35    0.55
   5   5   0   86.47    3.98
   5   5   1  128.70    4.98
   5   5   2   72.31    3.40
   5   5   3  342.31    9.73
   5   5   4  154.25    5.43
  -5  -5  -5  203.04    5.99
  -5  -5  -5  201.53    6.10
  -5  -5  -6   18.49    1.40
  -5  -5  -6   19.25    1.46
  -5  -5  -7  179.58    5.76
  -5  -5  -8   13.21    1.28
  -5  -5  -9   71.45    3.22
  -5  -5 -10   81.04    3.50
  -5  -5 -11    4.35    0.82
  -5  -5 -12  267.87    7.82
  -5  -5 -13  126.39    4.44
  -5  -5 -14  209.98    6.16
  -5  -5 -15    1.50    0.38
  -5  -5 -15    1.34    0.45
  -5  -5 -16   10.35    0.91
  -5  -6  15   10.24    0.91
  -5  -6  14    7.77    0.91
  -5  -6  13    7.48    1.04
  -5  -6  12   17.28    1.61
  -5  -6  12   17.62    1.34
  -5  -6  11   96.98    4.32
  -5  -6  11   94.18    3.69
  -5  -6  10   19.06    1.82
  -5  -6  10   17.74    1.45
  -5  -6   9  131.40    5.38
  -5  -6   9  133.83    4.74
  -5  -6   8  558.85   15.37
  -5  -6   8  551.52   18.08
  -5  -6   8  597.83   14.62
  -5  -6   7   15.44    1.60
  -5  -6   7   18.08    2.49
  -5  -6   7   19.05    1.45
  -5  -6   7   18.74    1.49
  -5  -6   7   22.22    1.59
  -5  -6   6  879.67   22.16
  -5  -6   6  927.55   21.33
  -5  -6   6  884.60   24.77
  -5  -6   6  895.29   21.18
  -5  -6   6  908.32   21.45
  -5  -6   5   46.59    2.64
  -5  -6   5   47.68    2.28
  -5  -6   5   48.15    3.63
  -5  -6   5   45.15    2.18
  -5  -6   5   44.47    2.30
  -5  -6   4   75.41    3.39
  -5  -6   4   78.24    4.46
  -5  -6   4   76.91    3.01
  -5  -6   4   81.34    3.20
  -5  -6   4   74.49    3.08
  -5  -6   4   73.98    2.90
  -5  -6   3   12.28    1.05
  -5  -6   3    9.67    0.90
  -5  -6   3   12.05    1.17
   5   6  -3   11.49    1.64
  -5  -6   3    8.72    1.35
  -5  -6   3   10.51    1.03
  -5  -6   3   10.15    0.98
   5   6  -2   12.05    1.58
  -5  -6   2   11.89    1.03
  -5  -6   2   10.88    1.48
   5   6  -1   97.26    4.65
   5   6   0   92.29    4.41
   5   6   1  156.53    5.94
   5   6   2  531.33   14.40
   5   6   3   40.75    2.60
   5   6   4    9.73    1.27
  -5  -6  -4   10.03    1.05
   5   6   5   22.44    1.87
  -5  -6  -5   22.68    1.59
  -5  -6  -5   21.49    1.57
   5   6   6  191.49    6.58
  -5  -6  -6  178.62    5.85
  -5  -6  -7   23.06    1.73
  -5  -6  -8   51.89    2.74
  -5  -6  -9   50.94    2.72
  -5  -6 -10   51.67    2.75
  -5  -6 -11  443.28   11.87
  -5  -6 -12  141.16    4.97
  -5  -6 -13   10.13    1.23
  -5  -6 -13   10.50    1.11
  -5  -6 -14    3.03    0.64
  -5  -6 -14    3.04    0.72
  -5  -6 -15   10.82    1.05
  -5  -6 -15   11.19    0.95
   5   6  16    9.38    0.80
  -5  -7  15   55.98    2.14
  -5  -7  14   65.54    2.71
  -5  -7  13   27.15    1.79
  -5  -7  12    2.22    0.63
  -5  -7  12    3.49    0.62
  -5  -7  11   15.30    1.53
  -5  -7  11   14.75    1.26
  -5  -7  10    0.73    0.53
  -5  -7  10    0.78    0.46
  -5  -7   9   28.73    2.25
  -5  -7   9   30.85    1.94
  -5  -7   8    4.80    0.92
  -5  -7   8    5.95    0.89
  -5  -7   8    4.86    0.81
  -5  -7   7  139.57    5.53
  -5  -7   7  140.74    7.39
  -5  -7   7  154.73    5.05
  -5  -7   7  144.61    4.98
  -5  -7   7  146.05    5.02
  -5  -7   6  129.99    4.42
  -5  -7   6  119.13    4.87
  -5  -7   6  119.84    4.28
  -5  -7   6  121.51    6.57
  -5  -7   6  119.38    4.38
  -5  -7   5   66.59    3.33
  -5  -7   5   77.92    3.08
   5   7  -5   61.31    4.40
  -5  -7   5   66.10    4.54
  -5  -7   5   71.95    3.09
  -5  -7   5   69.84    2.93
  -5  -7   5   67.16    2.99
  -5  -7   4  360.31   10.32
   5   7  -4  358.81   12.42
  -5  -7   4  357.07   12.27
  -5  -7   4  399.34    9.90
  -5  -7   4  370.54    9.98
  -5  -7   4  374.36    9.97
  -5  -7   4  368.05    9.75
  -5  -7   3   20.63    1.42
  -5  -7   3   20.99    1.62
   5   7  -3   19.68    2.20
  -5  -7   3   21.39    1.55
  -5  -7   3   23.38    1.52
  -5  -7   2  406.57   10.93
  -5  -7   2  412.23   10.65
  -5  -7   2  427.55   10.71
   5   7  -2  423.49   13.11
  -5  -7   2  421.03   10.91
  -5  -7   1   65.54    2.75
   5   7  -1   66.86    4.00
  -5  -7   1   69.32    2.80
  -5  -7   1   70.53    2.94
   5   7   0  270.76    9.01
  -5  -7   0  248.22    7.07
  -5  -7   0  251.97    7.21
   5   7   1  924.84   23.57
   5   7   2  613.23   16.16
  -5  -7  -2  573.02   14.45
   5   7   3  677.92   17.64
  -5  -7  -3  649.84   15.97
   5   7   4    3.80    0.92
  -5  -7  -4    3.64    0.71
   5   7   5   21.98    2.05
  -5  -7  -5   18.21    1.48
   5   7   6    2.61    0.81
  -5  -7  -6    1.53    0.53
   5   7   7   89.70    4.28
  -5  -7  -7   74.60    3.46
  -5  -7  -8    1.34    0.56
  -5  -7  -9    5.65    0.94
  -5  -7 -10   16.70    1.53
  -5  -7 -11  160.37    5.62
  -5  -7 -12  234.02    7.16
  -5  -7 -13   12.04    1.30
  -5  -7 -13   11.41    1.16
  -5  -7 -14    3.61    0.64
  -5  -7 -14    4.24    0.72
  -5  -7 -15   68.84    2.63
   5   7  15   74.84    2.84
   5   7  16    1.52    0.36
  -5  -8  14   26.18    1.43
  -5  -8  13   53.99    2.47
  -5  -8  12   20.32    1.58
  -5  -8  12   19.01    1.28
  -5  -8  11   34.86    2.26
  -5  -8  11   34.29    1.90
  -5  -8  10   11.06    1.33
  -5  -8  10   11.91    1.14
  -5  -8   9   21.78    1.93
  -5  -8   9   29.11    1.85
  -5  -8   8   33.53    2.41
  -5  -8   8   38.46    2.22
  -5  -8   8   40.21    2.24
  -5  -8   7    7.60    1.14
  -5  -8   7    9.15    1.05
  -5  -8   7    8.80    1.04
  -5  -8   6    9.42    1.10
  -5  -8   6    6.07    1.01
   5   8  -6    7.34    1.66
  -5  -8   6    9.05    1.74
  -5  -8   6    7.69    1.00
  -5  -8   6    8.17    1.02
  -5  -8   5  164.29    5.87
  -5  -8   5  168.29    5.40
   5   8  -5  157.66    7.82
  -5  -8   5  159.32    7.77
  -5  -8   5  168.38    5.54
  -5  -8   5  180.93    5.54
  -5  -8   5  166.00    5.52
  -5  -8   4   17.12    1.53
   5   8  -4   17.64    2.32
  -5  -8   4   19.95    1.46
  -5  -8   4   18.73    1.49
  -5  -8   4   19.53    1.45
  -5  -8   3   10.33    1.05
  -5  -8   3   12.23    1.25
   5   8  -3   12.20    1.91
  -5  -8   3   12.53    1.12
  -5  -8   3   11.68    1.17
  -5  -8   2   41.41    2.11
  -5  -8   2   39.51    2.12
   5   8  -2   39.93    3.28
  -5  -8   2   41.20    2.25
  -5  -8   1  753.84   18.02
   5   8  -1  782.03   20.88
  -5  -8   1  745.48   17.90
  -5  -8   1  739.01   18.16
  -5  -8   0  312.60    8.55
   5   8   0  324.35   10.61
  -5  -8   0  289.48    8.34
  -5  -8   0  309.58    8.32
   5   8   1  962.65   24.13
  -5  -8  -1  905.30   21.76
  -5  -8  -1  922.79   21.79
   5   8   2  427.73   12.71
  -5  -8  -2  406.57   10.74
   5   8   3  470.13   13.71
  -5  -8  -3  463.24   11.93
  -5  -8  -4    1.73    0.49
   5   8   4    3.09    0.77
  -5  -8  -5    0.23    0.41
   5   8   5    0.96    0.56
   5   8   6   62.28    3.68
  -5  -8  -6   55.06    2.89
   5   8   7   62.81    3.70
  -5  -8  -7   55.08    2.94
  -5  -8  -8  138.96    5.21
  -5  -8  -9    5.22    0.96
  -5  -8 -10    2.52    0.76
  -5  -8 -11   63.86    3.15
  -5  -8 -12   10.71    1.19
  -5  -8 -13    3.22    0.65
  -5  -8 -14  114.52    3.99
   5   8  14  124.85    4.23
   5   8  15   40.61    1.90
   5   8  16  109.00    3.24
  -5  -9  13   -0.23    0.32
  -5  -9  12    4.74    0.73
  -5  -9  12    4.33    0.58
  -5  -9  11   40.02    2.26
  -5  -9  11   36.67    1.90
  -5  -9  10    3.38    0.76
  -5  -9  10    2.96    0.65
  -5  -9   9  450.47   12.44
  -5  -9   9  456.77   11.75
  -5  -9   8    8.74    1.17
  -5  -9   8   10.84    1.14
  -5  -9   7   16.67    1.62
  -5  -9   7   19.19    1.55
  -5  -9   7   18.18    1.48
  -5  -9   6   38.41    2.47
  -5  -9   6   42.41    2.35
  -5  -9   6   43.01    2.35
  -5  -9   6   41.01    2.26
  -5  -9   6   38.59    2.25
  -5  -9   5   48.85    2.43
  -5  -9   5   45.17    2.62
  -5  -9   5   45.97    2.48
  -5  -9   5   46.00    2.44
  -5  -9   5   43.73    2.42
  -5  -9   4   47.41    2.35
   5   9  -4   47.14    4.01
  -5  -9   4   46.17    2.49
  -5  -9   4   45.15    2.40
  -5  -9   3   17.86    1.42
   5   9  -3   17.36    2.36
  -5  -9   3   17.61    1.39
  -5  -9   3   16.45    1.43
   5   9  -2    4.84    1.25
  -5  -9   2    3.52    0.65
  -5  -9   2    3.29    0.71
  -5  -9   2    3.10    0.60
  -5  -9   1   13.54    1.18
  -5  -9   1   13.92    1.24
   5   9  -1   13.75    1.91
  -5  -9   1   14.86    1.34
  -5  -9   0  918.31   21.90
   5   9   0  947.69   24.76
  -5  -9   0  913.29   21.61
  -5  -9   0  925.27   22.01
   5   9   1  195.65    7.74
  -5  -9  -1  180.54    5.85
  -5  -9  -1  182.08    5.64
  -5  -9  -1  185.92    5.92
  -5  -9  -2  655.45   16.49
  -5  -9  -2  661.52   16.45
   5   9   3   78.11    4.45
  -5  -9  -3   78.80    3.28
  -5  -9  -3   76.67    3.22
   5   9   4   81.15    4.55
  -5  -9  -4   78.08    3.45
   5   9   4   91.96    3.53
   5   9   5  239.65    8.55
  -5  -9  -5  212.40    6.90
   5   9   6  226.12    8.28
  -5  -9  -6  212.74    6.99
   5   9   7  125.87    5.73
  -5  -9  -7  108.46    4.56
  -5  -9  -8  220.70    7.29
  -5  -9  -9   29.13    2.16
  -5  -9 -10  271.95    8.36
  -5  -9 -11    4.86    0.92
  -5  -9 -12   34.53    2.13
   5   9  12   34.68    2.19
  -5  -9 -13   20.96    1.51
   5   9  13   21.86    1.60
   5   9  14   56.83    2.49
   5   9  15    8.99    0.79
  -5 -10  12   11.02    0.89
  -5 -10  12   10.64    0.80
  -5 -10  11   42.40    2.10
  -5 -10  11   43.18    1.93
  -5 -10  10  146.38    4.96
  -5 -10  10  146.66    4.62
  -5 -10   9  109.74    4.27
  -5 -10   9  112.39    3.95
  -5 -10   8  133.79    5.03
  -5 -10   8  145.35    4.82
  -5 -10   7   20.47    1.71
  -5 -10   7   24.66    1.74
  -5 -10   7   23.62    1.67
  -5 -10   6   16.51    1.43
  -5 -10   6   14.91    1.35
  -5 -10   6   16.73    1.42
  -5 -10   5    3.08    0.68
  -5 -10   5    3.89    0.74
  -5 -10   5    3.86    0.70
  -5 -10   5    3.65    0.70
  -5 -10   4   29.57    1.83
  -5 -10   4   29.15    1.92
  -5 -10   3   42.39    2.32
  -5 -10   3   40.88    2.14
  -5 -10   3   38.20    2.29
  -5 -10   2   14.92    1.34
   5  10  -2   12.49    2.15
  -5 -10   2   14.95    1.24
  -5 -10   2   15.07    1.39
  -5 -10   1  129.66    4.62
  -5 -10   1  129.29    4.38
   5  10  -1  128.39    6.57
  -5 -10   1  127.65    4.71
  -5 -10   0   69.99    2.95
  -5 -10   0   72.64    3.18
   5  10   0   69.86    4.58
  -5 -10   0   71.17    3.24
  -5 -10  -1  325.06    9.45
  -5 -10  -1  354.25    9.27
   5  10   1  354.79   11.92
  -5 -10  -1  345.85    9.62
  -5 -10  -2    0.60    0.37
   5  10   2    1.53    0.73
  -5 -10  -2    0.41    0.45
  -5 -10  -2    1.37    0.51
   5  10   3   84.43    4.80
  -5 -10  -3   76.32    3.45
  -5 -10  -3   90.29    3.53
  -5 -10  -3   80.37    3.42
   5  10   4  326.56   11.21
  -5 -10  -4  320.76    9.25
   5  10   4  335.35    9.09
   5  10   5   69.81    4.28
  -5 -10  -5   63.34    3.16
   5  10   5   67.54    3.09
  -5 -10  -6   67.20    3.34
   5  10   6   69.79    3.25
  -5 -10  -7  428.43   12.39
   5  10   7  484.86   12.48
  -5 -10  -8    8.29    1.20
   5  10   8    9.12    1.16
  -5 -10  -9  372.33   10.64
   5  10   9  365.65   10.52
  -5 -10 -10   29.86    2.13
   5  10  10   26.76    2.00
  -5 -10 -11  194.76    6.30
   5  10  11  184.18    6.19
  -5 -10 -12    6.89    0.94
   5  10  12    8.58    1.02
   5  10  13   13.59    1.19
   5  10  14    2.24    0.48
   5  10  15    6.37    0.61
  -5 -11  11   56.56    2.11
  -5 -11  10  246.69    6.64
  -5 -11   9   97.72    3.45
  -5 -11   8   87.99    3.36
  -5 -11   7    7.59    0.97
  -5 -11   7    6.73    0.89
  -5 -11   6   33.08    2.02
  -5 -11   6   29.85    1.90
  -5 -11   6   30.70    1.91
  -5 -11   5   16.67    1.43
  -5 -11   5   15.62    1.38
  -5 -11   5   14.91    1.33
  -5 -11   4    4.84    0.80
  -5 -11   4    5.12    0.83
  -5 -11   4    4.69    0.78
  -5 -11   3    4.32    0.73
  -5 -11   3    4.02    0.76
  -5 -11   3    3.68    0.71
  -5 -11   2   34.76    2.10
  -5 -11   2   34.19    1.89
  -5 -11   2   31.23    2.08
  -5 -11   1   32.44    2.01
  -5 -11   1   29.77    1.77
  -5 -11   1   31.96    2.09
  -5 -11   0   74.48    3.30
  -5 -11   0   78.45    3.10
  -5 -11   0   76.55    3.45
  -5 -11  -1   28.30    1.92
  -5 -11  -1   28.25    1.95
  -5 -11  -1   29.10    1.73
  -5 -11  -2   37.41    2.00
  -5 -11  -2   35.74    2.21
  -5 -11  -2   37.76    2.26
  -5 -11  -3    3.42    0.71
  -5 -11  -3    3.47    0.69
  -5 -11  -3    5.04    0.73
  -5 -11  -4   31.06    2.09
  -5 -11  -4   34.02    1.92
   5  11   4   36.30    2.04
  -5 -11  -4   35.45    2.09
  -5 -11  -5  200.36    6.43
   5  11   5  197.44    6.14
  -5 -11  -5  181.51    5.75
  -5 -11  -6    7.31    1.04
   5  11   6    8.12    1.06
  -5 -11  -7   36.79    2.44
   5  11   7   45.07    2.50
  -5 -11  -8  277.06    8.65
   5  11   8  293.67    8.55
  -5 -11  -9  141.59    5.24
   5  11   9  131.69    4.94
  -5 -11 -10   81.84    3.60
   5  11  10   72.98    3.36
   5  11  11   34.09    2.05
   5  11  12    9.69    1.00
   5  11  13   31.82    1.71
   5  11  14    0.16    0.24
  -5 -12  10   69.37    2.39
  -5 -12   9  222.47    6.05
  -5 -12   8    4.67    0.66
  -5 -12   7   50.38    2.33
  -5 -12   6   11.23    1.12
  -5 -12   6    9.46    1.01
  -5 -12   5    0.73    0.46
  -5 -12   5    0.76    0.45
  -5 -12   5    0.36    0.41
  -5 -12   4   -0.08    0.45
  -5 -12   4    0.14    0.43
  -5 -12   3  162.80    5.52
  -5 -12   3  158.78    5.02
  -5 -12   3  171.30    5.46
  -5 -12   2   41.76    2.07
  -5 -12   2   41.70    2.40
  -5 -12   2   44.63    2.36
  -5 -12   1  125.36    4.47
  -5 -12   1  123.13    4.10
  -5 -12   1  118.48    4.56
  -5 -12   0    0.03    0.35
  -5 -12   0    0.48    0.54
  -5 -12   0    0.53    0.48
  -5 -12  -1   94.63    3.82
  -5 -12  -1   96.99    3.96
  -5 -12  -2   24.86    1.78
  -5 -12  -2   24.45    1.79
  -5 -12  -3   31.67    2.05
  -5 -12  -3   29.61    1.96
  -5 -12  -4   25.82    1.84
  -5 -12  -4   25.64    1.76
  -5 -12  -5  106.99    4.28
   5  12   5  115.06    4.11
   5  12   6    9.10    1.03
  -5 -12  -6    8.93    1.12
   5  12   7   37.39    2.16
   5  12   8   27.74    1.85
   5  12   9   26.89    1.80
   5  12  10   60.16    2.76
   5  12  11    0.92    0.39
   5  12  12   68.04    2.69
   5  12  13    0.34    0.25
  -5 -13   9    0.01    0.19
  -5 -13   8   25.08    1.34
  -5 -13   7   28.09    1.52
  -5 -13   6   14.19    1.13
  -5 -13   5   11.74    1.09
  -5 -13   5   12.41    1.11
  -5 -13   5   12.10    1.09
  -5 -13   4  133.29    4.50
  -5 -13   4  134.18    4.57
  -5 -13   4  135.25    4.54
  -5 -13   3   14.32    1.25
  -5 -13   3   16.02    1.38
  -5 -13   2  376.74   10.17
  -5 -13   2  370.56    9.91
  -5 -13   1   59.72    2.90
  -5 -13   1   60.10    2.74
  -5 -13   0  226.87    6.85
  -5 -13   0  240.79    7.21
  -5 -13  -1    7.34    0.97
  -5 -13  -1    6.84    0.96
  -5 -13  -2    0.37    0.41
  -5 -13  -2    0.70    0.43
  -5 -13  -3   14.03    1.30
  -5 -13  -3   16.03    1.37
  -5 -13  -4   17.48    1.47
  -5 -13  -4   19.13    1.47
  -5 -13  -5   10.54    1.13
  -5 -13  -6    7.66    0.95
  -5 -13  -7   17.32    1.47
  -5 -13  -8   92.23    3.67
   5  13   8   99.37    3.64
  -5 -13  -9   13.77    1.21
   5  13   9   16.66    1.28
  -5 -13 -10    5.07    0.70
   5  13  10    5.92    0.74
  -5 -13 -11   31.38    1.66
  -5 -13 -12   41.40    1.76
  -5 -14   7    4.70    0.52
  -5 -14   6   -0.26    0.31
  -5 -14   5   11.81    0.96
  -5 -14   4   23.93    1.44
  -5 -14   4   24.33    1.49
  -5 -14   4   24.14    1.46
  -5 -14   3  391.35   10.04
  -5 -14   3  389.09   10.19
  -5 -14   3  402.16   10.14
  -5 -14   2   11.37    1.05
  -5 -14   2   11.37    1.12
  -5 -14   2    9.89    0.99
  -5 -14   1  187.14    5.84
  -5 -14   1  190.29    5.64
  -5 -14   0   -0.03    0.43
  -5 -14   0    0.65    0.41
  -5 -14  -1   -0.60    0.52
  -5 -14  -1   -0.15    0.40
  -5 -14  -2   11.40    1.07
  -5 -14  -2   11.65    1.14
  -5 -14  -3    0.55    0.40
  -5 -14  -3    0.60    0.37
  -5 -14  -4   10.80    1.06
  -5 -14  -4   12.38    1.09
  -5 -14  -5   13.29    1.17
  -5 -14  -6   15.23    1.23
  -5 -14  -7   65.81    2.75
  -5 -14  -8    0.86    0.32
  -5 -14  -9    2.88    0.49
  -5 -14 -10   17.57    1.10
  -5 -15   5   60.64    2.13
  -5 -15   4  116.21    3.51
  -5 -15   3   24.78    1.34
  -5 -15   3   25.53    1.41
  -5 -15   3   25.79    1.37
  -5 -15   2   97.91    3.24
  -5 -15   2   92.40    3.20
  -5 -15   1   40.04    1.86
  -5 -15   1   42.66    2.03
  -5 -15   1   41.56    1.87
  -5 -15   0    0.91    0.32
  -5 -15   0    1.02    0.41
  -5 -15   0    0.43    0.26
  -5 -15  -1   12.18    1.07
  -5 -15  -1   12.84    1.00
  -5 -15  -2    2.19    0.45
  -5 -15  -2    2.02    0.47
  -5 -15  -3   22.45    1.35
  -5 -15  -3   22.27    1.39
  -5 -15  -4    5.90    0.69
  -5 -15  -4    6.08    0.68
  -5 -15  -5   23.21    1.37
  -5 -15  -6  114.60    3.66
  -5 -15  -7    4.86    0.60
  -5 -15  -8   12.69    0.87
  -5 -16   1    0.38    0.24
  -5 -16   0   12.09    0.81
  -5 -16   0   15.36    0.99
  -5 -16  -1   -0.09    0.24
  -5 -16  -1    0.27    0.24
  -5 -16  -2   28.22    1.33
  -5 -16  -2   29.47    1.42
  -5 -16  -3    1.07    0.31
  -6  11   6   10.23    0.75
  -6  11   5  263.09    6.74
  -6  11   5  260.73    6.59
  -6  11   4    9.57    0.83
  -6  11   4    7.33    0.65
  -6  11   3   88.14    3.05
  -6  11   2   10.39    0.89
  -6  11   1   22.08    1.32
  -6  11   0    0.53    0.30
  -6  11  -1    0.06    0.25
  -6  11  -2    3.07    0.45
  -6  11  -3    9.74    0.71
  -6  10   9   41.19    1.68
  -6  10   8    1.18    0.36
  -6  10   7   30.78    1.59
  -6  10   6  236.58    6.49
  -6  10   5    8.07    0.87
  -6  10   4  235.83    6.41
  -6  10   4  238.18    6.52
  -6  10   3   45.58    2.10
  -6  10   3   46.60    2.05
  -6  10   2    4.19    0.65
  -6  10   2    3.45    0.52
  -6  10   1    0.71    0.35
  -6  10   0   13.39    1.13
  -6  10  -1    2.61    0.56
  -6  10  -2   70.77    2.77
  -6  10  -3   12.02    0.97
  -6  10  -4   55.86    2.19
  -6  10  -5   20.00    1.09
  -6   9  10    7.62    0.70
  -6   9   9    0.44    0.30
  -6   9   8    0.84    0.38
  -6   9   7    5.03    0.73
  -6   9   6   71.26    2.99
  -6   9   5   48.48    2.38
  -6   9   4  121.26    4.06
  -6   9   4  120.08    4.20
  -6   9   3    4.69    0.72
  -6   9   3    5.01    0.73
  -6   9   2   28.29    1.75
  -6   9   2   25.26    1.58
  -6   9   1   42.23    2.19
  -6   9   1   36.03    1.87
  -6   9   0  133.96    4.54
  -6   9   0  126.11    4.04
  -6   9  -1  132.86    4.58
  -6   9  -1  132.39    4.58
  -6   9  -2  101.94    3.78
  -6   9  -3  129.79    4.35
  -6   9  -4   87.00    3.24
  -6   9  -5   45.56    2.05
  -6   9  -6    5.08    0.59
  -6   9  -7   15.60    0.91
  -6   8  11    1.73    0.37
  -6   8  10   19.40    1.25
  -6   8   9   20.20    1.52
  -6   8   9   19.52    1.36
  -6   8   8    7.14    0.96
  -6   8   8    7.50    0.91
  -6   8   7   12.35    1.25
  -6   8   7   11.34    1.14
  -6   8   6   41.37    2.31
  -6   8   5   24.90    1.76
  -6   8   4    8.58    0.94
  -6   8   4    9.77    1.11
  -6   8   3    0.30    0.33
  -6   8   3    1.16    0.47
  -6   8   2   12.81    1.22
  -6   8   2   15.00    1.31
  -6   8   1   32.12    1.99
  -6   8   1   30.83    1.84
  -6   8   0   42.89    2.34
  -6   8   0   38.41    2.02
  -6   8  -1  215.95    6.55
  -6   8  -1  199.48    5.91
  -6   8  -2  182.55    5.89
  -6   8  -2  183.80    5.92
  -6   8  -3  179.44    5.76
  -6   8  -4    0.19    0.45
  -6   8  -5   25.02    1.60
  -6   8  -6    0.47    0.31
  -6   8  -7   23.38    1.36
  -6   8  -8   39.46    1.64
   6  -8   8   38.53    1.77
  -6   7  12    2.83    0.53
  -6   7  12    2.24    0.37
  -6   7  11    8.44    0.93
  -6   7  11    7.97    0.76
  -6   7  10   -0.06    0.41
  -6   7  10   -0.05    0.31
  -6   7   9   76.67    3.42
  -6   7   9   78.52    3.19
  -6   7   8   11.92    1.33
  -6   7   8   12.58    1.22
  -6   7   7   79.38    3.58
  -6   7   7   76.58    3.40
  -6   7   6    4.11    0.85
  -6   7   6    3.79    0.80
  -6   7   5   27.32    1.96
  -6   7   5   27.69    1.93
  -6   7   4    4.09    0.80
  -6   7   4    4.85    0.86
  -6   7   3   32.95    2.07
  -6   7   3   31.57    1.93
  -6   7   3   31.49    2.02
  -6   7   2    7.28    0.94
  -6   7   2    6.11    0.88
  -6   7   1   58.38    2.83
  -6   7   1   59.15    2.79
  -6   7   0   52.49    2.70
  -6   7   0   53.79    2.56
  -6   7  -1    3.07    0.67
  -6   7  -1    3.37    0.63
  -6   7  -2   98.60    3.94
  -6   7  -2   91.98    3.83
  -6   7  -2   94.49    3.46
  -6   7  -3    4.33    0.83
  -6   7  -4  157.63    5.32
  -6   7  -5  147.54    4.98
  -6   7  -6    2.88    0.58
  -6   7  -7    1.53    0.47
  -6   7  -8    1.17    0.41
   6  -7   9    4.39    0.70
  -6   7  -9    4.46    0.55
   6  -7  10  122.16    3.69
  -6   6  13    2.02    0.45
  -6   6  12    0.19    0.34
  -6   6  12    0.38    0.21
  -6   6  11    0.40    0.42
  -6   6  11    0.43    0.31
  -6   6  10  107.33    4.27
  -6   6  10  115.49    3.98
  -6   6   9    8.84    1.22
  -6   6   9    8.25    1.00
  -6   6   8   72.25    3.50
  -6   6   8   76.81    3.35
  -6   6   7   47.80    2.75
  -6   6   7   44.85    2.53
  -6   6   6   28.18    2.08
  -6   6   6   27.78    1.99
  -6   6   5   68.40    3.31
  -6   6   5   66.41    3.23
  -6   6   4  101.59    4.13
  -6   6   4   98.94    4.09
  -6   6   3   12.58    1.28
  -6   6   3   10.84    1.11
  -6   6   3   14.88    1.41
  -6   6   2   69.71    3.14
  -6   6   2   69.47    3.09
  -6   6   2   67.42    3.15
  -6   6   1    6.83    0.93
  -6   6   1    6.95    0.93
  -6   6   0    1.16    0.44
  -6   6   0    1.55    0.48
  -6   6  -1   57.37    2.86
  -6   6  -1   56.67    2.65
  -6   6  -2   36.85    2.25
  -6   6  -2   38.41    2.05
  -6   6  -3  286.83    8.40
  -6   6  -4   62.74    3.01
  -6   6  -5   15.37    1.38
  -6   6  -6  177.13    5.70
  -6   6  -7    0.49    0.47
  -6   6  -8    4.56    0.69
  -6   6  -9  118.33    3.82
   6  -6  10    0.16    0.51
  -6   6 -10    0.11    0.28
   6  -6  11   87.83    3.01
  -6   5  14    2.60    0.42
  -6   5  13    1.31    0.42
  -6   5  12    5.42    0.81
  -6   5  12    5.09    0.58
  -6   5  11    6.86    0.98
  -6   5  11    7.24    0.79
  -6   5  10  103.30    4.28
  -6   5  10  110.99    3.94
  -6   5   9  140.14    5.37
  -6   5   9  154.33    5.11
  -6   5   8  187.11    6.46
  -6   5   8  191.17    6.19
  -6   5   7   79.83    3.75
  -6   5   7   83.51    3.63
  -6   5   6  298.50    8.89
  -6   5   6  292.91    8.72
  -6   5   5    4.42    0.85
  -6   5   5    4.29    0.82
  -6   5   4   40.64    2.39
  -6   5   4   40.91    2.42
  -6   5   3    1.93    0.61
  -6   5   3    1.23    0.53
  -6   5   2    8.78    1.06
  -6   5   2    9.71    1.05
  -6   5   2    8.11    1.31
  -6   5   2   10.51    1.15
  -6   5   1    4.49    0.74
  -6   5   1    3.75    1.06
  -6   5   1    3.97    0.71
  -6   5   1    3.88    0.73
  -6   5   0   34.30    2.97
  -6   5   0   34.73    2.09
  -6   5   0   33.73    2.01
  -6   5  -1   21.76    2.45
  -6   5  -1   16.52    1.44
  -6   5  -1   19.52    1.47
  -6   5  -2   25.71    1.84
  -6   5  -2   27.03    1.87
  -6   5  -2   23.86    1.62
  -6   5  -3   -0.27    0.51
  -6   5  -3    0.43    0.41
  -6   5  -4   20.37    1.64
  -6   5  -5  381.35   10.45
  -6   5  -6   14.40    1.34
  -6   5  -7    0.67    0.47
  -6   5  -8   39.63    2.12
  -6   5  -9   97.02    3.51
  -6   5 -10   52.08    2.19
   6  -5  10   47.98    2.58
   6  -5  11   16.19    1.32
   6  -5  12   41.04    1.88
  -6   4  14   27.29    1.46
  -6   4  13    4.63    0.71
  -6   4  12   17.17    1.43
  -6   4  11  158.39    5.52
  -6   4  11  161.26    4.89
  -6   4  10   59.45    3.10
  -6   4  10   60.45    2.70
  -6   4   9  393.03   11.22
  -6   4   9  403.21   10.69
  -6   4   8  182.44    6.41
  -6   4   8  188.36    6.09
  -6   4   7  294.12    8.99
  -6   4   7  305.65    8.79
  -6   4   6   12.26    1.35
  -6   4   6   13.24    1.33
  -6   4   5    5.03    0.87
  -6   4   5    4.97    0.88
  -6   4   4  332.79    9.40
  -6   4   4  330.84    9.46
  -6   4   3    2.71    0.62
  -6   4   3    3.28    0.76
  -6   4   3    1.55    0.51
  -6   4   2    8.87    1.03
  -6   4   2    8.50    1.33
  -6   4   2   11.10    1.19
  -6   4   1    2.10    0.66
  -6   4   1    1.93    0.54
  -6   4   1    2.25    0.59
  -6   4   0   10.55    1.14
  -6   4   0    9.03    1.41
  -6   4   0    8.28    0.98
  -6   4  -1  140.42    6.52
  -6   4  -1  139.23    4.90
  -6   4  -1  144.33    4.81
  -6   4  -2   66.93    3.11
  -6   4  -2   66.80    3.07
  -6   4  -2   69.63    4.44
  -6   4  -2   68.40    2.92
  -6   4  -3   66.58    3.08
  -6   4  -3   65.02    4.40
  -6   4  -3   61.94    2.75
  -6   4  -4  184.84    5.98
  -6   4  -4  171.93    7.89
  -6   4  -4  182.41    5.56
  -6   4  -5    2.33    0.73
  -6   4  -6  123.32    4.56
  -6   4  -7    7.64    1.00
  -6   4  -8    2.76    0.59
  -6   4  -9  101.04    3.72
  -6   4 -10  174.78    5.27
   6  -4  11   98.87    3.89
  -6   4 -11   96.75    3.28
   6  -4  12   44.25    2.17
   6  -4  13    0.25    0.30
  -6   3  14   30.57    1.63
  -6   3  13   14.96    1.24
  -6   3  13   14.86    1.38
  -6   3  12    6.19    0.92
  -6   3  12    5.16    0.94
  -6   3  11   15.14    1.45
  -6   3  11   13.69    1.53
  -6   3  10  230.93    7.31
  -6   3  10  216.74    6.48
  -6   3  10  228.31    7.63
  -6   3   9   29.83    2.17
  -6   3   9   28.06    1.82
  -6   3   9   28.73    2.28
  -6   3   8  172.22    6.25
  -6   3   8  186.65    5.96
  -6   3   8  188.73    6.71
  -6   3   7    6.21    1.01
  -6   3   7    6.98    0.99
  -6   3   6   -0.05    0.53
  -6   3   6    0.18    0.36
  -6   3   5    3.28    0.77
  -6   3   5    4.44    0.79
  -6   3   4    5.24    0.80
  -6   3   4    6.36    0.94
  -6   3   4    5.48    0.87
  -6   3   3   17.24    1.38
  -6   3   3   17.15    1.40
  -6   3   3   16.16    1.76
  -6   3   3   18.44    1.52
  -6   3   2  292.59    8.13
  -6   3   2  279.32    8.09
  -6   3   2  300.11    9.76
  -6   3   2  303.04    8.43
  -6   3   1   18.29    1.42
  -6   3   1   19.26    2.07
  -6   3   1   18.07    1.45
  -6   3   0  529.55   13.30
  -6   3   0  515.79   13.28
  -6   3   0  536.34   15.48
  -6   3   0  536.64   13.39
  -6   3  -1   22.98    1.63
  -6   3  -1   22.66    2.34
  -6   3  -1   22.59    1.57
  -6   3  -2  507.76   13.19
  -6   3  -2  525.84   15.59
  -6   3  -2  509.49   12.87
  -6   3  -3  363.27    9.97
  -6   3  -3  352.41   12.16
  -6   3  -3  364.21    9.58
  -6   3  -4  227.85    6.91
  -6   3  -4  215.11    8.88
  -6   3  -4  224.05    6.50
  -6   3  -5  222.76    6.88
  -6   3  -5  217.13    8.99
  -6   3  -5  226.93    6.47
  -6   3  -6   28.33    1.90
  -6   3  -7   45.10    2.43
  -6   3  -8    4.17    0.76
  -6   3  -9  120.79    4.27
  -6   3 -10   16.14    1.27
   6  -3  11  112.22    4.43
  -6   3 -11  108.98    3.73
   6  -3  12    3.20    0.74
  -6   3 -12    3.53    0.53
   6  -3  13   40.30    1.99
   6  -3  14   25.53    1.35
  -6   2  15   31.66    1.46
  -6   2  14    6.13    0.75
  -6   2  14    7.29    0.92
  -6   2  13    9.72    1.04
  -6   2  13    9.21    1.13
  -6   2  12   16.30    1.47
  -6   2  12   17.94    1.66
  -6   2  11   59.58    3.04
  -6   2  11   57.03    3.21
  -6   2  10   44.53    2.85
  -6   2   9    6.33    1.12
  -6   2   9    6.65    0.86
  -6   2   8    7.44    1.18
  -6   2   8    6.64    0.89
  -6   2   7   28.24    1.92
  -6   2   7   27.46    1.86
  -6   2   7   27.37    2.15
  -6   2   6  493.25   12.64
  -6   2   6  467.64   12.55
  -6   2   6  487.80   13.24
  -6   2   5    2.71    0.59
  -6   2   5    3.18    0.70
  -6   2   4    0.24    0.37
  -6   2   4    1.15    0.73
  -6   2   4    0.89    0.51
  -6   2   3  587.63   14.89
  -6   2   3  618.76   16.38
  -6   2   3  603.88   15.05
  -6   2   2    3.43    0.67
  -6   2   2    3.14    0.68
  -6   2   2    2.06    0.81
  -6   2   2    3.16    0.70
  -6   2   1 1144.03   27.19
  -6   2   1 1197.57   29.26
  -6   2   1 1204.13   27.34
  -6   2   0   32.91    1.95
  -6   2   0   34.42    2.02
  -6   2   0   33.17    2.72
  -6   2   0   36.06    2.00
  -6   2  -1  961.08   22.48
  -6   2  -1  932.96   22.52
  -6   2  -1  960.41   24.83
  -6   2  -1  962.05   22.37
  -6   2  -2  236.17    7.02
  -6   2  -2  235.36    8.80
  -6   2  -2  236.00    6.80
  -6   2  -3  177.06    5.67
  -6   2  -3  175.33    7.43
  -6   2  -3  170.65    5.34
  -6   2  -4   25.46    1.77
  -6   2  -4   25.34    2.64
  -6   2  -4   29.55    1.71
  -6   2  -5   19.49    1.53
  -6   2  -5   15.40    2.13
  -6   2  -5   17.50    1.30
  -6   2  -6   24.32    1.74
  -6   2  -6   23.02    2.53
  -6   2  -6   25.15    1.58
  -6   2  -7    7.44    0.98
  -6   2  -8    2.80    0.64
  -6   2  -9   15.32    1.30
  -6   2 -10    0.32    0.40
   6  -2  11    6.59    1.13
  -6   2 -11    6.48    0.81
   6  -2  12    7.43    1.06
  -6   2 -12    7.54    0.80
   6  -2  13   67.87    2.88
   6  -2  14   23.03    1.38
   6  -2  15   18.19    1.04
  -6   1  15    6.00    0.63
  -6   1  14    6.49    0.77
  -6   1  14    4.45    0.76
  -6   1  13   22.13    1.58
  -6   1  13   23.92    1.81
  -6   1  12   66.90    3.41
  -6   1  11   95.26    3.84
  -6   1  11   94.70    4.33
  -6   1  10   68.88    3.27
  -6   1  10   72.56    3.74
  -6   1   9  186.02    6.31
  -6   1   9  193.43    6.86
  -6   1   8   33.42    2.22
  -6   1   8   37.74    2.08
  -6   1   8   37.56    2.56
  -6   1   7  201.09    6.50
  -6   1   7  193.63    6.14
  -6   1   7  199.74    6.87
  -6   1   6  164.21    5.62
  -6   1   6  159.42    5.40
  -6   1   6  174.35    6.06
  -6   1   5   97.42    3.88
  -6   1   5   92.71    3.71
  -6   1   4  118.06    4.38
  -6   1   4  130.93    5.19
  -6   1   4  119.07    4.36
  -6   1   3  178.19    5.74
  -6   1   3  181.51    6.68
  -6   1   3  184.36    5.78
  -6   1   2  681.30   16.80
  -6   1   2  695.79   18.27
  -6   1   2  690.52   16.78
  -6   1   1  462.34   12.07
  -6   1   1  468.20   11.95
  -6   1   1  487.37   13.71
  -6   1   1  472.53   12.04
  -6   1   0  327.91    8.97
  -6   1   0  316.36    8.87
  -6   1   0  343.52   10.67
  -6   1   0  335.08    8.90
  -6   1  -1  304.46    8.38
  -6   1  -1  296.72    8.31
  -6   1  -1  300.72   10.03
  -6   1  -1  296.85    8.17
  -6   1  -2  279.92    7.71
  -6   1  -2  262.90    7.59
  -6   1  -2  258.09    9.29
  -6   1  -2  259.38    7.36
  -6   1  -3    0.17    0.72
  -6   1  -3    0.59    0.44
  -6   1  -3    0.30    0.34
  -6   1  -4   76.36    3.24
  -6   1  -4   69.20    4.34
  -6   1  -4   80.23    3.07
  -6   1  -5   52.68    2.57
  -6   1  -5   44.09    3.47
  -6   1  -5   49.60    2.30
  -6   1  -6  591.42   14.93
  -6   1  -6  584.70   17.39
  -6   1  -6  602.59   14.55
  -6   1  -7   15.98    1.39
  -6   1  -7   17.51    2.24
  -6   1  -7   17.19    1.32
  -6   1  -8  198.00    6.17
  -6   1  -9   34.58    2.01
  -6   1 -10  113.68    4.09
   6  -1  11    1.37    0.81
  -6   1 -11   -0.03    0.36
   6  -1  12   45.58    2.56
  -6   1 -12   48.28    2.21
   6  -1  13   14.28    1.25
  -6   1 -13   13.10    1.00
   6  -1  14   61.33    2.53
   6  -1  15    8.21    0.74
  -6   0  15    4.99    0.59
  -6   0  15    3.94    0.58
  -6   0  14    8.09    0.86
  -6   0  14    8.49    0.98
  -6   0  13   85.33    3.33
  -6   0  13   87.91    3.75
  -6   0  12   26.98    1.85
  -6   0  12   31.36    2.20
  -6   0  11  254.14    7.72
  -6   0  11  238.43    7.98
  -6   0  10   55.54    2.99
  -6   0  10   54.84    3.17
  -6   0   9   65.94    3.35
  -6   0   9   68.54    3.60
  -6   0   8    6.01    0.98
  -6   0   8    6.29    1.08
  -6   0   7   93.40    4.03
  -6   0   7   93.68    3.58
  -6   0   7   94.67    4.21
  -6   0   6   11.17    1.25
  -6   0   6   11.90    1.14
  -6   0   6   13.21    1.41
  -6   0   5   13.26    1.30
  -6   0   5   13.96    1.23
  -6   0   5   11.60    1.29
  -6   0   4  129.03    4.73
  -6   0   4  143.07    5.48
  -6   0   4  129.53    4.52
  -6   0   3  107.58    4.14
  -6   0   3  115.35    4.11
  -6   0   2  257.26    7.53
  -6   0   2  273.86    8.73
  -6   0   2  259.60    7.43
  -6   0   1   15.12    1.29
  -6   0   1   16.45    1.78
  -6   0   1   17.31    1.31
  -6   0   0  248.75    7.28
  -6   0   0  258.30    8.69
  -6   0   0  254.98    7.16
  -6   0  -1   78.28    3.20
  -6   0  -1   73.23    3.06
  -6   0  -1   76.34    4.16
  -6   0  -1   77.00    3.03
  -6   0  -2  623.41   14.89
  -6   0  -2  592.82   14.77
  -6   0  -2  585.89   16.69
  -6   0  -2  584.59   14.51
  -6   0  -3    1.78    0.71
  -6   0  -3    1.98    0.79
  -6   0  -3    0.03    0.40
  -6   0  -3    0.32    0.36
  -6   0  -4  747.04   18.07
  -6   0  -4  722.60   20.30
  -6   0  -4  753.80   17.74
  -6   0  -5  305.23    8.60
  -6   0  -5  308.91   10.60
  -6   0  -5  309.07    8.27
  -6   0  -6  305.23    8.49
  -6   0  -6  291.08   10.36
  -6   0  -6  298.40    8.13
  -6   0  -7  431.45   11.28
  -6   0  -7  412.53   13.28
  -6   0  -7  430.98   10.96
  -6   0  -8   84.35    3.45
  -6   0  -8   86.48    3.31
  -6   0  -9  349.83    9.52
  -6   0 -10    9.65    1.08
   6   0  11   30.29    2.18
  -6   0 -11   34.56    1.95
   6   0  12    2.91    0.80
  -6   0 -12    1.65    0.47
   6   0  13   31.50    1.91
  -6   0 -13   29.29    1.61
   6   0  14    4.40    0.70
   6   0  15    0.44    0.28
  -6  -1  15    0.66    0.30
  -6  -1  15    0.17    0.26
  -6  -1  14  191.56    5.70
  -6  -1  14  206.76    6.08
  -6  -1  13    0.20    0.37
  -6  -1  13    0.62    0.52
  -6  -1  12  345.03    9.79
  -6  -1  12  341.99    9.96
  -6  -1  11    0.18    0.48
  -6  -1  11   -0.18    0.54
  -6  -1  10  152.43    5.71
  -6  -1  10  150.80    5.77
  -6  -1   9   30.99    2.25
  -6  -1   9   30.12    2.27
  -6  -1   8    1.15    0.60
  -6  -1   8    1.04    0.53
  -6  -1   7   14.26    1.49
  -6  -1   7   14.16    1.48
  -6  -1   6   34.97    2.27
  -6  -1   6   36.34    2.00
  -6  -1   6   36.62    2.33
  -6  -1   5   11.16    1.28
  -6  -1   5   10.50    1.07
  -6  -1   5   13.16    1.34
  -6  -1   4  343.95    9.44
  -6  -1   4  322.10    8.93
  -6  -1   3   58.87    2.80
  -6  -1   3   58.37    3.28
  -6  -1   3   55.34    2.56
  -6  -1   2  243.76    7.17
  -6  -1   2  254.97    8.22
  -6  -1   2  237.48    6.95
  -6  -1   1    0.60    0.40
  -6  -1   1    1.53    0.68
  -6  -1   1    0.74    0.36
  -6  -1   0   26.25    1.71
  -6  -1   0   29.57    2.35
  -6  -1   0   30.16    1.72
  -6  -1  -1   52.28    2.52
  -6  -1  -1   54.91    3.35
  -6  -1  -1   50.80    2.34
  -6  -1  -2   76.82    3.17
  -6  -1  -2   69.81    3.01
  -6  -1  -2   74.77    4.12
  -6  -1  -2   79.14    2.99
  -6  -1  -3  233.87    6.73
  -6  -1  -3  218.03    6.58
  -6  -1  -3  212.39    8.05
  -6  -1  -3  223.17    6.37
  -6  -1  -4    0.67    0.50
  -6  -1  -4    0.48    0.44
  -6  -1  -4    1.01    0.41
  -6  -1  -5  418.40   10.83
  -6  -1  -5  384.89   12.58
  -6  -1  -5  413.46   10.50
  -6  -1  -6  133.84    4.58
  -6  -1  -6  120.07    5.77
  -6  -1  -6  127.58    4.30
  -6  -1  -7  824.32   19.48
  -6  -1  -7  790.65   21.54
  -6  -1  -7  804.25   19.16
  -6  -1  -8   44.99    2.35
  -6  -1  -8   42.66    2.20
  -6  -1  -9   80.86    3.43
  -6  -1  -9   89.17    3.37
  -6  -1 -10   10.90    1.16
   6   1  11   47.48    2.73
  -6  -1 -11   50.62    2.48
   6   1  12   10.22    1.18
  -6  -1 -12    8.07    0.93
  -6  -1 -13    3.61    0.59
   6   1  13    3.47    0.70
   6   1  14   16.32    1.24
  -6  -1 -14   17.86    1.14
   6   1  15   50.41    2.08
  -6  -2  15   31.14    1.51
  -6  -2  15   32.82    1.53
  -6  -2  14    3.58    0.61
  -6  -2  14    3.04    0.56
  -6  -2  13  228.78    6.99
  -6  -2  13  230.51    6.95
  -6  -2  12    1.28    0.61
  -6  -2  12    0.55    0.49
  -6  -2  11   93.85    4.17
  -6  -2  11   90.71    4.04
  -6  -2  10  249.19    8.06
  -6  -2  10  242.20    7.87
  -6  -2   9  412.84   11.65
  -6  -2   9  388.35   11.33
  -6  -2   8    6.55    1.12
  -6  -2   8    7.23    1.10
  -6  -2   7    3.66    0.68
  -6  -2   7    3.94    0.85
  -6  -2   7    3.56    0.79
  -6  -2   6   11.95    1.35
  -6  -2   6   11.48    1.00
  -6  -2   6   11.15    1.25
  -6  -2   5   79.06    3.51
  -6  -2   5   72.83    2.76
  -6  -2   5   66.21    2.94
  -6  -2   5   72.63    3.29
  -6  -2   4   36.09    2.21
  -6  -2   4   34.53    1.73
  -6  -2   4   30.01    1.80
  -6  -2   4   33.83    1.88
  -6  -2   3  609.14   14.73
  -6  -2   3  554.41   14.15
  -6  -2   2   15.22    1.30
  -6  -2   2   14.95    1.64
  -6  -2   2   13.91    1.18
  -6  -2   1   -0.73    0.57
  -6  -2   1    0.26    0.55
  -6  -2   0   86.25    3.43
  -6  -2   0   90.14    4.31
  -6  -2  -1   78.74    3.25
  -6  -2  -1   87.47    4.31
  -6  -2  -1   82.17    3.12
  -6  -2  -2    1.22    0.56
  -6  -2  -2    1.43    0.33
  -6  -2  -3   41.59    2.16
  -6  -2  -3   34.79    1.96
  -6  -2  -3   37.21    2.82
  -6  -2  -3   36.66    1.91
  -6  -2  -4  190.39    5.83
  -6  -2  -4  182.44    5.70
  -6  -2  -4  172.58    7.05
  -6  -2  -4  183.91    5.51
  -6  -2  -5  132.98    4.50
  -6  -2  -5  117.24    5.61
  -6  -2  -5  127.50    4.26
  -6  -2  -6 1179.15   26.68
  -6  -2  -6 1098.41   28.61
  -6  -2  -6 1136.30   26.33
  -6  -2  -7   28.36    1.83
  -6  -2  -7   24.67    2.34
  -6  -2  -7   28.12    1.75
  -6  -2  -8  225.09    6.70
  -6  -2  -8  211.91    6.42
  -6  -2  -9  138.58    4.81
  -6  -2 -10  137.07    4.79
   6   2  11   52.11    2.79
  -6  -2 -11   53.11    2.57
   6   2  12   50.04    2.54
  -6  -2 -12   45.86    2.33
  -6  -2 -13    2.03    0.51
   6   2  13    2.06    0.54
   6   2  14   91.51    3.30
  -6  -2 -14   91.19    3.15
   6   2  15   16.63    1.10
  -6  -3  15    0.16    0.25
  -6  -3  14   97.55    3.58
  -6  -3  13   29.59    1.95
  -6  -3  13   30.92    1.84
  -6  -3  12  218.02    7.09
  -6  -3  12  218.48    6.78
  -6  -3  11    4.34    0.89
  -6  -3  11    4.70    0.83
  -6  -3  10    3.01    0.85
  -6  -3  10    3.54    0.83
  -6  -3   9  345.07   10.35
  -6  -3   9  335.44    9.89
  -6  -3   8   29.88    2.28
  -6  -3   8   27.72    2.94
  -6  -3   8   31.01    2.01
  -6  -3   8   31.66    2.18
  -6  -3   7    6.16    0.82
  -6  -3   7    4.69    0.93
  -6  -3   7    5.38    0.89
  -6  -3   7    5.84    1.44
  -6  -3   7    3.88    0.75
  -6  -3   6   92.33    4.03
  -6  -3   6   84.79    3.19
  -6  -3   6   84.60    4.76
  -6  -3   6   81.88    3.46
  -6  -3   6   85.65    3.69
  -6  -3   5  103.15    4.19
  -6  -3   5   95.74    3.42
  -6  -3   5   93.37    3.66
  -6  -3   4  292.73    8.45
  -6  -3   4  289.62    7.62
  -6  -3   4  267.07    7.75
  -6  -3   3  372.64    9.88
  -6  -3   3  357.93    9.12
  -6  -3   3  345.98    9.26
  -6  -3   3  339.31    9.18
  -6  -3   2  420.80   10.76
  -6  -3   2  383.01   10.02
  -6  -3   1   93.71    3.67
  -6  -3   0   34.84    1.99
  -6  -3   0   37.49    2.64
  -6  -3  -1   75.08    3.11
  -6  -3  -1   73.52    3.93
  -6  -3  -1   72.31    2.91
  -6  -3  -2    0.93    0.48
  -6  -3  -2    0.78    0.46
  -6  -3  -2    1.30    0.39
  -6  -3  -3    1.58    0.53
  -6  -3  -3    1.46    0.45
  -6  -3  -3    2.30    0.75
  -6  -3  -3    1.14    0.40
  -6  -3  -4    3.05    0.73
  -6  -3  -4    2.28    0.79
  -6  -3  -4    1.56    0.47
  -6  -3  -4    0.42    0.39
  -6  -3  -5  492.12   12.26
  -6  -3  -5  478.22   12.01
  -6  -3  -6    1.73    0.57
  -6  -3  -6    0.58    0.51
  -6  -3  -6    2.30    0.64
  -6  -3  -7   15.80    1.36
  -6  -3  -7   15.23    1.75
  -6  -3  -7   15.93    1.32
  -6  -3  -8   34.45    2.00
  -6  -3  -8   35.15    2.11
  -6  -3  -9   78.31    3.37
   6   3  10  226.56    7.20
  -6  -3 -10  246.68    7.19
   6   3  11  128.26    4.65
  -6  -3 -11  126.46    4.55
   6   3  12   79.41    3.27
  -6  -3 -12   78.51    3.24
   6   3  13   32.75    1.84
  -6  -3 -13   31.61    1.81
  -6  -3 -14    4.79    0.64
   6   3  14    4.51    0.62
   6   3  15  151.15    4.35
  -6  -3 -15  148.95    4.25
  -6  -4  15   19.80    1.18
  -6  -4  14   65.63    2.76
  -6  -4  13   34.17    2.09
  -6  -4  12  153.64    5.55
  -6  -4  11   12.42    1.42
  -6  -4  10  253.57    8.27
  -6  -4  10  251.42    7.49
  -6  -4   9    0.00    0.55
  -6  -4   9    1.09    0.55
  -6  -4   8    2.62    0.72
  -6  -4   8    0.51    0.85
  -6  -4   8    1.27    0.51
  -6  -4   7  290.08    8.10
  -6  -4   7  303.04    9.25
  -6  -4   7  277.25   10.75
  -6  -4   7  299.73    8.49
  -6  -4   6  155.45    5.86
  -6  -4   6  162.58    5.08
  -6  -4   6  161.47    7.21
  -6  -4   6  160.76    5.34
  -6  -4   5  538.56   14.26
  -6  -4   5  540.74   13.28
  -6  -4   5  553.91   15.93
  -6  -4   5  524.09   13.53
  -6  -4   4  624.98   15.83
  -6  -4   4  653.06   17.28
  -6  -4   4  626.84   14.97
  -6  -4   3  298.49    8.64
  -6  -4   3  309.57    8.06
  -6  -4   3  283.99    8.02
  -6  -4   2  165.74    5.46
  -6  -4   2  159.69    4.99
  -6  -4   1   14.45    1.27
  -6  -4   0    1.06    0.31
  -6  -4   0    0.92    0.32
  -6  -4  -1    9.65    0.99
  -6  -4  -1   11.07    1.02
  -6  -4  -2    5.55    0.77
  -6  -4  -2    6.15    0.78
  -6  -4  -3   12.89    1.15
  -6  -4  -3   13.91    1.22
  -6  -4  -3   11.41    1.55
  -6  -4  -3   14.00    1.19
  -6  -4  -4    4.94    0.80
  -6  -4  -4    4.53    0.74
  -6  -4  -4    3.65    0.98
  -6  -4  -4    5.53    0.82
  -6  -4  -5   37.41    2.13
  -6  -4  -5   35.33    2.74
  -6  -4  -5   38.35    2.05
  -6  -4  -6  150.13    4.93
  -6  -4  -6  149.56    5.08
  -6  -4  -7   12.51    1.22
  -6  -4  -7   12.95    1.26
  -6  -4  -8   11.13    1.20
  -6  -4  -9   87.15    3.67
   6   4  10    9.60    1.10
  -6  -4 -10    8.98    1.13
   6   4  11   83.21    3.37
  -6  -4 -11   78.92    3.39
   6   4  12  115.77    4.00
  -6  -4 -12  108.97    4.07
   6   4  13    7.60    0.84
  -6  -4 -13    6.35    0.81
   6   4  14  111.08    3.60
  -6  -4 -14  112.60    3.73
  -6  -4 -15   49.88    1.99
  -6  -5  15   41.69    1.75
  -6  -5  14  102.39    3.60
  -6  -5  13   14.42    1.32
  -6  -5  12   17.25    1.56
  -6  -5  11    1.04    0.60
  -6  -5  10   15.66    1.64
  -6  -5  10   14.88    1.34
  -6  -5   9   19.57    1.89
  -6  -5   9   19.80    1.57
  -6  -5   8   33.43    2.48
  -6  -5   8   36.28    2.18
  -6  -5   7  308.10    8.43
  -6  -5   7  298.02    9.36
  -6  -5   7  284.67   11.16
  -6  -5   7  304.28    8.66
  -6  -5   6    2.21    0.69
  -6  -5   6    1.18    0.53
  -6  -5   6    1.10    0.43
  -6  -5   6    1.93    1.19
  -6  -5   6    2.31    0.61
  -6  -5   5 1399.18   33.15
  -6  -5   5 1439.22   32.17
  -6  -5   5 1428.65   35.39
  -6  -5   5 1412.04   31.87
  -6  -5   5 1383.66   32.36
  -6  -5   4   31.64    2.14
   6   5  -4   29.14    2.64
  -6  -5   4   33.63    2.79
  -6  -5   4   30.89    1.79
  -6  -5   4   26.78    1.57
  -6  -5   4   29.86    1.83
  -6  -5   3  867.44   20.90
  -6  -5   3  856.95   20.18
   6   5  -3  913.00   22.56
  -6  -5   3  906.76   22.44
  -6  -5   2    2.57    0.68
   6   5  -2    1.87    0.77
  -6  -5   2    1.52    0.48
  -6  -5   2    2.35    0.52
  -6  -5   1  187.85    5.91
  -6  -5   1  179.09    5.57
  -6  -5   0   47.00    2.36
  -6  -5   0   44.41    2.22
  -6  -5  -1   -0.02    0.36
  -6  -5  -1    0.49    0.49
  -6  -5  -2   21.44    1.51
  -6  -5  -2   23.74    1.59
  -6  -5  -3  292.61    8.07
  -6  -5  -3  278.26    8.05
  -6  -5  -4  191.63    5.78
  -6  -5  -4  197.49    5.95
  -6  -5  -4  186.16    5.93
  -6  -5  -5  394.47   10.33
  -6  -5  -5  382.61   10.41
  -6  -5  -6   36.49    2.10
  -6  -5  -6   34.74    2.15
  -6  -5  -7   12.04    1.27
  -6  -5  -8   16.88    1.50
  -6  -5  -9  102.82    4.13
  -6  -5 -10   13.01    1.31
  -6  -5 -11    5.93    0.90
  -6  -5 -12  120.38    4.35
  -6  -5 -13  260.44    7.36
  -6  -5 -14   36.10    1.82
  -6  -5 -15   23.31    1.27
  -6  -6  14   21.31    1.34
  -6  -6  13   90.61    3.52
  -6  -6  12   66.28    3.14
  -6  -6  11   11.27    1.32
  -6  -6  11   10.08    1.04
  -6  -6  10    2.22    0.71
  -6  -6  10    2.60    0.59
  -6  -6   9  115.08    4.97
  -6  -6   9  125.27    4.50
  -6  -6   8   14.15    1.58
  -6  -6   8   16.59    1.44
  -6  -6   7   71.44    3.74
  -6  -6   7   74.16    3.06
  -6  -6   7   76.53    3.34
  -6  -6   7   75.78    3.25
  -6  -6   6  821.33   21.06
  -6  -6   6  868.76   20.13
  -6  -6   6  802.92   23.48
  -6  -6   6  833.42   19.84
  -6  -6   6  841.98   20.28
  -6  -6   5   17.30    1.68
   6   6  -5   14.74    2.03
  -6  -6   5   18.71    1.47
  -6  -6   5   13.63    2.08
  -6  -6   5   18.04    1.34
  -6  -6   5   17.37    1.45
  -6  -6   4  682.45   16.96
   6   6  -4  653.58   18.82
  -6  -6   4  646.27   18.75
  -6  -6   4  681.81   16.21
  -6  -6   4  652.94   15.86
  -6  -6   4  646.87   16.21
  -6  -6   3   51.05    2.31
  -6  -6   3   55.49    2.84
   6   6  -3   52.51    3.60
  -6  -6   3   52.26    2.49
  -6  -6   3   52.38    2.48
  -6  -6   2  249.00    7.49
  -6  -6   2  243.42    6.90
  -6  -6   2  250.78    7.15
  -6  -6   2  248.57    7.08
  -6  -6   1  252.04    7.50
  -6  -6   1  254.47    7.08
   6   6  -1  274.17    9.05
  -6  -6   1  257.03    7.29
  -6  -6   0   63.81    2.86
  -6  -6   0   61.80    2.63
   6   6   0   70.18    3.78
  -6  -6   0   63.67    2.81
  -6  -6  -1    1.05    0.42
  -6  -6  -1    1.91    0.67
  -6  -6  -1    1.27    0.43
  -6  -6  -2  621.67   15.40
  -6  -6  -2  645.58   15.62
  -6  -6  -3   84.33    3.25
  -6  -6  -3   88.53    3.49
  -6  -6  -3   83.31    3.36
  -6  -6  -4  684.24   16.32
  -6  -6  -4  635.81   16.21
  -6  -6  -5  111.67    4.15
  -6  -6  -5  108.63    4.19
  -6  -6  -6   55.61    2.82
  -6  -6  -7    1.15    0.56
  -6  -6  -8   42.72    2.49
  -6  -6  -9    0.63    0.52
  -6  -6 -10   30.52    2.04
  -6  -6 -11   55.62    2.80
  -6  -6 -12    2.81    0.65
  -6  -6 -13   45.64    2.28
  -6  -6 -14    3.04    0.55
  -6  -6 -15   41.25    1.76
  -6  -7  14   75.71    2.66
  -6  -7  13    0.58    0.33
  -6  -7  12    0.50    0.43
  -6  -7  11    0.97    0.49
  -6  -7  11    0.18    0.39
  -6  -7  10   40.64    2.56
  -6  -7  10   39.81    2.16
  -6  -7   9    3.13    0.82
  -6  -7   9    3.24    0.72
  -6  -7   8   19.95    1.88
  -6  -7   8   24.02    1.70
  -6  -7   7   65.41    3.52
  -6  -7   7   68.92    2.97
  -6  -7   7   68.55    3.07
  -6  -7   7   66.52    3.07
  -6  -7   6   37.72    2.55
  -6  -7   6   39.60    2.22
  -6  -7   6   38.16    2.11
  -6  -7   6   39.60    2.26
  -6  -7   5  408.39   11.69
  -6  -7   5  427.59   11.01
   6   7  -5  388.53   13.76
  -6  -7   5  399.46   13.94
  -6  -7   5  423.99   10.85
  -6  -7   5  420.51   11.11
  -6  -7   4   10.93    1.25
   6   7  -4   12.72    1.90
  -6  -7   4   12.55    1.22
  -6  -7   4   12.00    1.11
  -6  -7   4    9.77    1.08
  -6  -7   3    9.68    0.97
  -6  -7   3   12.50    1.30
   6   7  -3    8.94    1.45
  -6  -7   3    9.12    1.02
  -6  -7   3   10.69    1.08
  -6  -7   2  230.42    7.24
  -6  -7   2  232.66    6.85
   6   7  -2  248.76    9.18
  -6  -7   2  242.78    7.24
  -6  -7   2  242.05    7.02
  -6  -7   1    4.92    0.80
   6   7  -1    3.83    1.05
  -6  -7   1    4.14    0.71
  -6  -7   1    3.37    0.65
  -6  -7   1    5.39    0.82
  -6  -7   0  844.58   19.61
  -6  -7   0  806.96   19.59
  -6  -7   0  819.39   19.47
  -6  -7   0  784.73   19.50
  -6  -7   0  822.40   19.68
  -6  -7  -1  169.31    5.35
  -6  -7  -1  162.30    5.42
  -6  -7  -1  173.77    5.44
  -6  -7  -2   19.35    1.46
  -6  -7  -2   23.04    1.68
  -6  -7  -3 1520.78   35.12
  -6  -7  -3 1547.79   34.97
  -6  -7  -4  117.29    4.35
  -6  -7  -5   81.82    3.54
  -6  -7  -6   72.97    3.38
  -6  -7  -7   39.70    2.42
  -6  -7  -8    0.34    0.51
  -6  -7  -9   16.16    1.55
  -6  -7 -10   20.37    1.69
  -6  -7 -11    0.24    0.49
  -6  -7 -12   77.04    3.27
  -6  -7 -13   66.95    2.85
  -6  -7 -14    0.28    0.30
  -6  -7 -15   21.72    1.20
   6   7  15   24.26    1.33
  -6  -8  13   16.77    1.13
  -6  -8  12    0.08    0.37
  -6  -8  11   10.58    1.13
  -6  -8  11   10.01    0.94
  -6  -8  10    1.21    0.59
  -6  -8  10    0.74    0.41
  -6  -8   9   46.14    2.78
  -6  -8   9   50.17    2.49
  -6  -8   8   33.31    2.36
  -6  -8   8   34.10    2.04
  -6  -8   7   54.81    3.12
  -6  -8   7   54.45    2.65
  -6  -8   7   59.99    2.84
  -6  -8   7   57.65    2.78
  -6  -8   6    0.49    0.46
  -6  -8   6    0.29    0.54
  -6  -8   6    0.31    0.39
  -6  -8   6    0.86    0.47
  -6  -8   5   63.59    3.27
  -6  -8   5   65.52    2.94
  -6  -8   5   59.95    2.79
  -6  -8   5   61.48    2.91
  -6  -8   4   67.78    3.34
   6   8  -4   64.58    4.61
  -6  -8   4   72.60    3.11
  -6  -8   4   72.02    3.04
  -6  -8   4   70.96    3.12
  -6  -8   3   11.48    1.11
  -6  -8   3   12.02    1.26
   6   8  -3   12.25    1.92
  -6  -8   3   12.75    1.23
  -6  -8   3   13.08    1.29
  -6  -8   3   12.35    1.21
  -6  -8   2  117.39    4.38
  -6  -8   2  115.38    4.17
   6   8  -2  120.75    6.10
  -6  -8   2  113.99    4.36
  -6  -8   2  118.41    4.23
  -6  -8   2  120.73    4.26
  -6  -8   1  494.01   12.84
  -6  -8   1  529.65   13.04
   6   8  -1  522.00   15.54
  -6  -8   1  502.51   13.14
  -6  -8   0   33.43    1.97
   6   8   0   37.50    3.01
  -6  -8   0   34.26    2.02
  -6  -8   0   37.00    2.15
   6   8   1  879.54   22.46
  -6  -8  -1  836.31   20.13
  -6  -8  -1  831.02   20.18
   6   8   2  847.60   21.38
  -6  -8  -2  807.86   19.17
   6   8   3   36.10    2.79
  -6  -8  -3   37.60    2.12
  -6  -8  -4  301.67    8.60
  -6  -8  -5  672.87   16.88
  -6  -8  -6   23.58    1.83
  -6  -8  -7   77.97    3.60
  -6  -8  -8    0.30    0.49
  -6  -8  -9   68.92    3.35
  -6  -8 -10   71.86    3.37
  -6  -8 -11    0.54    0.48
  -6  -8 -12   91.98    3.65
  -6  -8 -13   12.52    1.11
  -6  -8 -14    2.80    0.50
   6   8  14    3.37    0.58
   6   8  15   11.25    0.84
  -6  -9  12   46.52    2.05
  -6  -9  11    2.87    0.57
  -6  -9  11    2.35    0.46
  -6  -9  10   13.79    1.29
  -6  -9  10   13.83    1.14
  -6  -9   9  153.00    5.50
  -6  -9   9  163.58    5.13
  -6  -9   8   54.89    2.97
  -6  -9   8   57.60    2.69
  -6  -9   7   34.30    2.31
  -6  -9   7   35.73    2.06
  -6  -9   7   35.11    2.07
  -6  -9   6    1.07    0.56
  -6  -9   6    0.33    0.45
  -6  -9   6    1.25    0.50
  -6  -9   6    0.39    0.36
  -6  -9   5   10.34    1.21
  -6  -9   5   11.21    1.19
  -6  -9   5   11.51    1.18
  -6  -9   5   10.48    1.16
  -6  -9   4   21.81    1.75
  -6  -9   4   23.19    1.64
  -6  -9   4   20.98    1.57
  -6  -9   4   20.97    1.59
  -6  -9   3   34.24    2.01
  -6  -9   3   31.49    2.04
  -6  -9   3   29.86    1.91
  -6  -9   3   33.24    1.97
   6   9  -2    6.26    1.49
  -6  -9   2    6.58    0.89
  -6  -9   2    7.04    0.94
  -6  -9   2    6.60    0.88
  -6  -9   1   13.49    1.25
  -6  -9   1   10.91    1.12
   6   9  -1   10.62    1.67
  -6  -9   1   12.73    1.29
  -6  -9   1   11.93    1.14
  -6  -9   0   59.07    2.81
   6   9   0   62.99    4.15
  -6  -9   0   63.59    2.85
  -6  -9   0   61.39    2.93
  -6  -9  -1  250.45    7.41
   6   9   1  254.61    9.29
  -6  -9  -1  249.51    7.31
  -6  -9  -1  246.82    7.42
   6   9   2   33.65    2.84
  -6  -9  -2   31.74    2.03
  -6  -9  -2   38.76    2.16
   6   9   3   43.52    3.21
  -6  -9  -3   35.72    2.20
  -6  -9  -4  368.69   10.12
  -6  -9  -5  176.94    5.97
  -6  -9  -6  164.45    5.76
  -6  -9  -7  130.83    4.99
  -6  -9  -8  126.06    4.93
  -6  -9  -9    7.97    1.16
  -6  -9 -10  240.30    7.46
  -6  -9 -11  217.45    6.76
  -6  -9 -12  107.78    3.95
   6   9  12  103.96    3.96
  -6  -9 -13    6.61    0.80
   6   9  13    7.69    0.91
  -6  -9 -14   -0.09    0.29
   6   9  14    0.15    0.28
  -6 -10  11   30.87    1.56
  -6 -10  11   30.11    1.45
  -6 -10  10   46.84    2.23
  -6 -10  10   50.15    2.13
  -6 -10   9   -0.29    0.42
  -6 -10   9    0.71    0.44
  -6 -10   8  509.29   13.77
  -6 -10   8  576.69   13.61
  -6 -10   7    1.98    0.59
  -6 -10   7    2.85    0.69
  -6 -10   7    3.52    0.72
  -6 -10   6  164.22    5.64
  -6 -10   6  167.34    5.46
  -6 -10   6  167.30    5.43
  -6 -10   5    0.94    0.50
  -6 -10   5    0.77    0.41
  -6 -10   5    1.36    0.50
  -6 -10   4   14.27    1.31
  -6 -10   4   15.26    1.33
  -6 -10   4   15.59    1.37
  -6 -10   3    0.32    0.44
  -6 -10   3    0.46    0.38
  -6 -10   3    0.65    0.40
  -6 -10   3    0.64    0.38
  -6 -10   2    2.01    0.55
  -6 -10   2    1.34    0.54
  -6 -10   2    1.85    0.55
  -6 -10   2    2.61    0.60
  -6 -10   1  155.52    5.22
  -6 -10   1  159.08    5.16
  -6 -10   1  149.60    5.33
  -6 -10   1  154.12    5.12
  -6 -10   0    3.88    0.73
  -6 -10   0    3.57    0.69
  -6 -10   0    4.15    0.77
  -6 -10  -1   15.94    1.42
  -6 -10  -1   16.70    1.37
  -6 -10  -1   15.82    1.40
  -6 -10  -2   98.21    3.96
  -6 -10  -2  100.64    3.84
  -6 -10  -2   98.42    3.88
  -6 -10  -3   15.70    1.43
  -6 -10  -3   16.36    1.37
  -6 -10  -4  151.21    5.47
  -6 -10  -4  167.69    5.49
  -6 -10  -5  120.80    4.58
   6  10   5  119.58    4.36
  -6 -10  -6  235.90    7.40
   6  10   6  232.96    7.15
  -6 -10  -7    6.86    1.04
   6  10   7    7.92    1.06
  -6 -10  -8    0.86    0.59
   6  10   8    2.18    0.67
  -6 -10  -9  245.16    7.31
   6  10   9  205.84    6.86
  -6 -10 -10   57.16    2.85
   6  10  10   50.25    2.67
  -6 -10 -11  213.15    6.35
   6  10  11  186.05    6.10
  -6 -10 -12   20.19    1.45
   6  10  12   18.75    1.38
   6  10  13   42.16    1.98
   6  10  14   30.45    1.45
  -6 -11  10    6.87    0.67
  -6 -11   9  140.98    4.31
  -6 -11   8   74.90    2.90
  -6 -11   7  149.27    4.79
  -6 -11   6   94.10    3.61
  -6 -11   6   93.35    3.56
  -6 -11   5    8.96    1.02
  -6 -11   5    8.70    0.99
  -6 -11   4   15.06    1.27
  -6 -11   4   14.48    1.31
  -6 -11   4   15.56    1.33
  -6 -11   3    9.23    1.01
  -6 -11   3    9.75    1.12
  -6 -11   3   10.35    1.09
  -6 -11   3    9.18    1.03
  -6 -11   2  188.12    5.75
  -6 -11   2  186.71    6.11
  -6 -11   2  183.98    5.88
  -6 -11   2  188.73    5.94
  -6 -11   1   88.62    3.60
  -6 -11   1   94.01    3.49
  -6 -11   1   83.69    3.65
  -6 -11   1   84.04    3.44
  -6 -11   0    7.78    1.02
  -6 -11   0    7.99    0.93
  -6 -11   0    8.54    1.05
  -6 -11  -1   30.35    1.98
  -6 -11  -1   30.45    2.00
  -6 -11  -1   32.69    1.89
  -6 -11  -2    2.69    0.60
  -6 -11  -2    1.76    0.59
  -6 -11  -2    3.10    0.65
  -6 -11  -3    9.29    1.11
  -6 -11  -3    8.86    0.98
  -6 -11  -3    9.75    1.06
  -6 -11  -4    0.15    0.42
  -6 -11  -4    0.12    0.35
  -6 -11  -5    7.81    0.99
  -6 -11  -5    6.91    0.87
  -6 -11  -5    6.28    0.98
  -6 -11  -6   -0.34    0.47
  -6 -11  -6    0.27    0.46
   6  11   6    0.10    0.33
  -6 -11  -7   92.89    3.93
   6  11   7   93.98    3.74
  -6 -11  -8   55.84    2.90
   6  11   8   59.35    2.81
  -6 -11  -9   28.62    1.94
   6  11   9   25.30    1.76
  -6 -11 -10   26.06    1.79
   6  11  10   22.83    1.61
   6  11  11    0.02    0.31
   6  11  12   71.01    2.75
   6  11  13   45.77    1.91
  -6 -12   9   25.73    1.29
  -6 -12   8  108.73    3.50
  -6 -12   7  103.85    3.53
  -6 -12   6    0.27    0.39
  -6 -12   6    0.29    0.35
  -6 -12   5   10.98    1.09
  -6 -12   5    9.80    1.01
  -6 -12   4   -0.06    0.40
  -6 -12   4    0.42    0.36
  -6 -12   3   89.79    3.58
  -6 -12   3   93.01    3.53
  -6 -12   3   79.82    3.15
  -6 -12   3   88.88    3.44
  -6 -12   2   37.73    1.97
  -6 -12   2   39.32    2.25
  -6 -12   2   39.98    2.18
  -6 -12   2   39.59    2.12
  -6 -12   1  119.92    4.31
  -6 -12   1  118.87    4.04
  -6 -12   1  118.86    4.43
  -6 -12   1  119.36    4.19
  -6 -12   0  117.64    4.24
  -6 -12   0  113.81    3.93
  -6 -12   0  113.05    4.32
  -6 -12  -1   77.84    3.30
  -6 -12  -1   78.21    3.05
  -6 -12  -1   74.07    3.29
  -6 -12  -2   29.94    1.93
  -6 -12  -2   28.96    1.69
  -6 -12  -2   27.66    1.82
  -6 -12  -3    8.90    1.06
  -6 -12  -3    8.60    0.97
  -6 -12  -3    9.14    0.93
  -6 -12  -4    7.57    0.85
  -6 -12  -4    6.82    0.93
  -6 -12  -5    0.20    0.28
  -6 -12  -5    1.44    0.53
  -6 -12  -6   12.41    1.07
   6  12   6   12.34    1.10
  -6 -12  -7    6.24    0.93
   6  12   7    3.67    0.65
   6  12   8    7.06    0.85
  -6 -12  -8    7.78    0.99
  -6 -12  -9    0.55    0.38
   6  12   9    0.90    0.37
  -6 -12 -10    0.79    0.40
   6  12  10    0.46    0.32
  -6 -12 -11   23.73    1.49
   6  12  11   25.10    1.44
  -6 -12 -12   57.85    2.32
   6  12  12   63.59    2.29
  -6 -13   8   32.95    1.42
  -6 -13   7    4.44    0.55
  -6 -13   6   13.85    1.01
  -6 -13   5   69.42    2.69
  -6 -13   5   63.01    2.55
  -6 -13   4   47.04    2.19
  -6 -13   4   42.04    2.03
  -6 -13   3    0.28    0.42
  -6 -13   3   -0.19    0.32
  -6 -13   2  113.49    4.03
  -6 -13   2  106.94    3.83
  -6 -13   2  105.27    3.73
  -6 -13   1   96.29    3.68
  -6 -13   1   92.96    3.53
  -6 -13   1   95.49    3.42
  -6 -13   1   90.55    3.21
  -6 -13   0  119.37    4.23
  -6 -13   0  120.18    3.89
  -6 -13   0  129.13    4.45
  -6 -13  -1   78.88    3.22
  -6 -13  -1   78.90    3.29
  -6 -13  -2   58.12    2.70
  -6 -13  -2   63.29    2.80
  -6 -13  -3    3.15    0.67
  -6 -13  -3    3.51    0.61
  -6 -13  -4    0.11    0.36
  -6 -13  -5    2.29    0.58
  -6 -13  -6   12.12    1.15
  -6 -13  -7    2.04    0.54
  -6 -13  -8    7.26    0.87
  -6 -13  -9    1.86    0.46
  -6 -13 -10   32.38    1.69
  -6 -13 -11   16.52    1.06
  -6 -14   6   24.88    1.20
  -6 -14   5   27.91    1.37
  -6 -14   4   76.68    2.77
  -6 -14   4   78.23    2.71
  -6 -14   3   83.71    2.99
  -6 -14   3   80.22    2.84
  -6 -14   2   43.76    2.02
  -6 -14   2   43.17    1.92
  -6 -14   1  181.21    5.40
  -6 -14   1  176.53    5.24
  -6 -14   1  174.12    5.03
  -6 -14   0    0.11    0.38
  -6 -14   0    0.93    0.45
  -6 -14  -1  126.38    4.26
  -6 -14  -1  129.97    4.22
  -6 -14  -2   -0.28    0.51
  -6 -14  -2   -0.11    0.32
  -6 -14  -3    2.32    0.49
  -6 -14  -3    3.20    0.54
  -6 -14  -4   19.93    1.38
  -6 -14  -5   14.53    1.17
  -6 -14  -6    9.50    0.94
  -6 -14  -7   65.22    2.61
  -6 -14  -8    5.85    0.70
  -6 -14  -9    8.67    0.77
  -6 -15   3    6.98    0.65
  -6 -15   2   67.73    2.43
  -6 -15   1    1.39    0.40
  -6 -15   0  100.59    3.28
  -6 -15  -1   27.50    1.45
  -6 -15  -2    2.84    0.49
  -6 -15  -3   14.94    1.05
  -6 -15  -4    0.99    0.33
  -6 -15  -5   13.55    0.98
  -6 -15  -6   78.55    2.71
  -6 -15  -7    0.71    0.26
  -7  10   3    3.15    0.46
  -7  10   2   75.38    2.61
  -7  10   1   14.10    0.96
  -7  10   0    1.87    0.39
  -7  10  -1   50.27    1.95
  -7  10  -2   11.30    0.79
  -7   9   7    1.27    0.34
  -7   9   6    0.87    0.34
  -7   9   5  123.44    3.75
  -7   9   5  129.38    3.93
  -7   9   4    2.53    0.48
  -7   9   4    2.17    0.47
  -7   9   3   24.71    1.45
  -7   9   3   24.73    1.38
  -7   9   2    1.24    0.40
  -7   9   2    0.96    0.34
  -7   9   1    2.88    0.54
  -7   9   1    2.83    0.45
  -7   9   0   67.52    2.69
  -7   9  -1   15.46    1.14
  -7   9  -2    3.23    0.55
  -7   9  -3   58.37    2.28
  -7   9  -4    1.01    0.35
  -7   9  -5  153.27    4.17
  -7   8   9    2.79    0.42
  -7   8   8   19.27    1.20
  -7   8   7    5.59    0.70
  -7   8   6   31.43    1.74
  -7   8   5    0.80    0.35
  -7   8   5    0.72    0.37
  -7   8   4   15.65    1.19
  -7   8   4   14.73    1.20
  -7   8   3   -0.13    0.31
  -7   8   3    0.09    0.30
  -7   8   2   18.92    1.40
  -7   8   2   17.60    1.28
  -7   8   1   46.95    2.31
  -7   8   1   42.07    2.01
  -7   8   0    2.05    0.58
  -7   8   0    2.73    0.48
  -7   8  -1  156.17    5.03
  -7   8  -2    8.23    0.92
  -7   8  -3    4.93    0.72
  -7   8  -4  240.91    6.64
  -7   8  -5   27.62    1.48
  -7   8  -6   26.67    1.33
  -7   7  10   41.93    1.73
  -7   7   9    3.35    0.60
  -7   7   9    3.02    0.51
  -7   7   8    0.13    0.39
  -7   7   8   -0.26    0.40
  -7   7   7   23.86    1.63
  -7   7   7   25.49    1.61
  -7   7   6    1.85    0.55
  -7   7   6    2.18    0.59
  -7   7   5   60.10    2.53
  -7   7   5   55.43    2.68
  -7   7   4   48.29    2.33
  -7   7   4   46.09    2.40
  -7   7   3   21.17    1.54
  -7   7   3   19.34    1.49
  -7   7   2    3.73    0.75
  -7   7   2    3.34    0.62
  -7   7   1    0.37    0.46
  -7   7   1    0.27    0.34
  -7   7   0   42.12    2.31
  -7   7   0   38.08    2.00
  -7   7  -1    0.23    0.49
  -7   7  -1    0.46    0.39
  -7   7  -2   44.56    2.33
  -7   7  -2   39.96    1.89
  -7   7  -3   51.81    2.51
  -7   7  -4   68.31    2.90
  -7   7  -5   25.63    1.58
  -7   7  -6   47.03    2.10
  -7   7  -7   24.23    1.32
  -7   7  -8   12.41    0.81
   7  -7   8   11.92    0.93
  -7   6  12   24.73    1.27
  -7   6  11   35.86    1.76
  -7   6  11   31.78    1.39
  -7   6  10   16.48    1.27
  -7   6  10   14.73    1.02
  -7   6   9   17.39    1.39
  -7   6   9   13.82    1.11
  -7   6   8  166.71    5.54
  -7   6   8  168.82    5.27
  -7   6   7   28.77    1.95
  -7   6   7   28.39    1.83
  -7   6   6  309.72    8.69
  -7   6   6  292.67    8.51
  -7   6   5   27.16    1.84
  -7   6   5   25.54    1.61
  -7   6   5   23.99    1.75
  -7   6   4   11.85    1.20
  -7   6   4   12.08    1.14
  -7   6   4   10.66    1.17
  -7   6   3   54.60    2.60
  -7   6   3   53.67    2.63
  -7   6   3   47.38    2.57
  -7   6   2   29.71    1.94
  -7   6   2   32.23    1.99
  -7   6   1    1.41    0.51
  -7   6   1    1.74    0.53
  -7   6   0    2.11    0.59
  -7   6   0    1.82    0.53
  -7   6  -1   18.13    1.54
  -7   6  -1   16.98    1.33
  -7   6  -2   15.55    1.41
  -7   6  -2   15.93    1.24
  -7   6  -3    1.75    0.58
  -7   6  -3    0.41    0.30
  -7   6  -4    9.81    1.09
  -7   6  -5   58.28    2.68
  -7   6  -6  123.63    4.21
  -7   6  -7   39.33    1.93
  -7   6  -8   15.61    1.07
  -7   6  -9   42.35    1.71
   7  -6   9   43.27    1.99
   7  -6  10    0.52    0.30
  -7   5  12    2.05    0.45
  -7   5  11    9.43    0.97
  -7   5  11    7.92    0.68
  -7   5  10    0.67    0.44
  -7   5  10    0.50    0.30
  -7   5   9  121.50    4.49
  -7   5   9  123.52    4.14
  -7   5   8   10.81    1.25
  -7   5   8   11.12    1.11
  -7   5   7  374.54   10.39
  -7   5   7  370.05   10.10
  -7   5   6  130.98    4.84
  -7   5   6  129.15    4.73
  -7   5   5   45.49    2.53
  -7   5   5   45.18    2.54
  -7   5   4   14.43    1.35
  -7   5   4   15.05    1.29
  -7   5   4   15.91    1.45
  -7   5   3    1.17    0.44
  -7   5   3    1.33    0.47
  -7   5   3    0.33    0.53
  -7   5   2   23.72    1.74
  -7   5   2   24.25    1.78
  -7   5   1    3.54    0.70
  -7   5   1    2.52    0.63
  -7   5   0   18.95    1.59
  -7   5   0   21.03    1.59
  -7   5  -1  217.35    6.88
  -7   5  -1  216.22    6.56
  -7   5  -2    0.40    0.50
  -7   5  -2    0.93    0.50
  -7   5  -3   77.09    3.43
  -7   5  -3   75.96    3.04
  -7   5  -4    1.34    0.62
  -7   5  -4    0.71    0.34
  -7   5  -5    3.15    0.72
  -7   5  -6   25.83    1.72
  -7   5  -7   61.53    2.70
  -7   5  -8   16.60    1.22
  -7   5  -9    5.64    0.66
   7  -5  10   32.09    1.71
  -7   5 -10   28.48    1.36
   7  -5  11   11.49    0.86
  -7   4  13    0.58    0.30
  -7   4  12    4.10    0.64
  -7   4  11    1.05    0.46
  -7   4  10    1.33    0.55
  -7   4  10    1.19    0.34
  -7   4   9   19.72    1.63
  -7   4   9   18.28    1.35
  -7   4   8   87.98    3.87
  -7   4   8   98.01    3.72
  -7   4   7  211.47    6.92
  -7   4   7  218.13    6.72
  -7   4   6   81.19    3.63
  -7   4   6   77.04    3.46
  -7   4   5  330.58    9.40
  -7   4   5  324.36    9.38
  -7   4   4  112.37    4.31
  -7   4   4  112.48    4.10
  -7   4   4  113.86    4.45
  -7   4   3   11.31    1.17
  -7   4   3   11.53    1.16
  -7   4   3   11.19    1.26
  -7   4   2   70.58    3.21
  -7   4   2   73.86    3.36
  -7   4   1   29.91    2.01
  -7   4   1   32.47    2.08
  -7   4   0  208.63    6.72
  -7   4   0  213.56    6.63
  -7   4  -1   31.45    2.12
  -7   4  -1   35.64    2.10
  -7   4  -2  352.80    9.93
  -7   4  -2  350.76    9.55
  -7   4  -3   17.83    1.57
  -7   4  -3   20.16    1.46
  -7   4  -4   17.66    1.54
  -7   4  -4   15.70    1.25
  -7   4  -5    4.22    0.81
  -7   4  -5    4.04    0.63
  -7   4  -6    2.94    0.69
  -7   4  -7   -0.15    0.44
  -7   4  -8   13.06    1.15
  -7   4  -9   25.42    1.51
   7  -4  10    1.04    0.59
  -7   4 -10    0.10    0.32
   7  -4  11   52.16    2.25
  -7   4 -11   46.72    1.83
   7  -4  12    4.64    0.56
  -7   3  13    8.45    0.81
  -7   3  12    5.45    0.75
  -7   3  11    1.70    0.57
  -7   3  10   31.15    2.06
  -7   3  10   33.35    1.72
  -7   3   9   51.03    2.78
  -7   3   9   52.78    2.43
  -7   3   8  123.44    4.85
  -7   3   8  131.55    4.56
  -7   3   7  159.12    5.66
  -7   3   7  154.98    5.34
  -7   3   6  103.57    4.23
  -7   3   6  102.06    4.11
  -7   3   5    9.27    1.12
  -7   3   5    8.14    1.09
  -7   3   4   83.65    3.43
  -7   3   4   83.78    3.56
  -7   3   4   80.10    3.61
  -7   3   3   12.78    1.23
  -7   3   3   13.12    1.26
  -7   3   3   11.38    1.15
  -7   3   3   12.10    1.27
  -7   3   2   31.75    1.96
  -7   3   2   28.74    1.90
  -7   3   2   29.27    2.03
  -7   3   1    1.38    0.52
  -7   3   1    1.30    0.52
  -7   3   0  358.85   10.07
  -7   3   0  365.65   10.03
  -7   3  -1  163.28    5.66
  -7   3  -1  165.03    5.48
  -7   3  -2  310.00    8.96
  -7   3  -2  306.76    8.64
  -7   3  -3   75.55    3.45
  -7   3  -3   74.65    3.15
  -7   3  -4    1.13    0.51
  -7   3  -4    0.33    0.42
  -7   3  -5    1.84    0.59
  -7   3  -5    2.39    0.52
  -7   3  -6    4.53    0.80
  -7   3  -7   26.05    1.78
  -7   3  -8   34.79    1.99
  -7   3  -9    6.86    0.83
  -7   3 -10   21.78    1.37
   7  -3  11    4.10    0.76
  -7   3 -11    3.74    0.55
   7  -3  12   13.72    1.07
   7  -3  13   18.84    1.05
  -7   2  14    0.54    0.25
  -7   2  13   -0.16    0.33
  -7   2  12    0.52    0.35
  -7   2  11   10.28    1.14
  -7   2  10   95.07    3.94
  -7   2   9   14.52    1.48
  -7   2   9   14.49    1.18
  -7   2   8  100.60    4.29
  -7   2   8  105.28    3.90
  -7   2   7  136.05    4.82
  -7   2   7  126.11    4.98
  -7   2   7  136.62    4.79
  -7   2   6  106.64    4.13
  -7   2   6  102.44    4.24
  -7   2   6  101.55    4.08
  -7   2   5    1.03    0.48
  -7   2   5    1.48    0.60
  -7   2   5    1.54    0.58
  -7   2   4   96.77    3.88
  -7   2   4   98.36    3.90
  -7   2   4   93.47    3.92
  -7   2   3    2.32    0.70
  -7   2   3    2.36    0.61
  -7   2   3    1.25    0.51
  -7   2   2  226.28    6.84
  -7   2   2  213.69    6.68
  -7   2   2  231.23    8.44
  -7   2   2  221.27    6.95
  -7   2   1  652.57   16.25
  -7   2   1  633.69   16.23
  -7   2   1  654.17   18.40
  -7   2   1  676.81   16.48
  -7   2   0    5.63    0.96
  -7   2   0    4.56    0.84
  -7   2   0    2.41    0.86
  -7   2   0    3.88    0.93
  -7   2  -1  487.55   12.98
  -7   2  -1  496.27   15.33
  -7   2  -1  508.35   12.91
  -7   2  -2   28.43    1.99
  -7   2  -2   30.63    2.95
  -7   2  -2   29.82    1.91
  -7   2  -3  678.95   17.13
  -7   2  -3  687.31   16.74
  -7   2  -4    2.88    0.70
  -7   2  -4    1.65    0.49
  -7   2  -5   57.57    2.91
  -7   2  -5   56.61    2.60
  -7   2  -6   85.62    3.65
  -7   2  -6   88.49    3.37
  -7   2  -7   97.37    3.86
  -7   2  -8   10.33    1.10
  -7   2  -9   51.63    2.45
  -7   2 -10   75.53    2.97
   7  -2  11    4.32    0.84
  -7   2 -11    4.04    0.60
   7  -2  12   14.95    1.20
  -7   2 -12   12.26    0.89
   7  -2  13    5.46    0.64
  -7   1  14    1.65    0.37
  -7   1  13    1.21    0.43
  -7   1  12    0.27    0.37
  -7   1  11   76.87    3.36
  -7   1  10   12.21    1.18
  -7   1   9  314.22    8.97
  -7   1   8   50.48    2.71
  -7   1   8   51.49    2.47
  -7   1   7    3.72    0.78
  -7   1   7    3.79    0.70
  -7   1   6   53.57    2.82
  -7   1   6   51.89    2.65
  -7   1   5   88.20    3.77
  -7   1   5   87.20    3.67
  -7   1   4    0.05    0.55
  -7   1   4    1.36    0.61
  -7   1   4    0.23    0.38
  -7   1   3   75.92    3.41
  -7   1   3   80.41    3.30
  -7   1   3   75.22    4.16
  -7   1   3   76.53    3.43
  -7   1   2  187.91    6.15
  -7   1   2  199.88    7.61
  -7   1   2  189.62    6.19
  -7   1   1    2.44    0.81
  -7   1   1    0.38    0.49
  -7   1   1    1.57    0.55
  -7   1   1    1.43    0.65
  -7   1   0 1065.10   25.20
  -7   1   0 1042.85   25.15
  -7   1   0 1090.80   27.65
  -7   1   0 1089.20   25.22
  -7   1  -1   11.38    1.28
  -7   1  -1   10.14    1.17
  -7   1  -1   11.89    1.81
  -7   1  -1   10.41    1.15
  -7   1  -2  151.06    5.28
  -7   1  -2  152.04    6.95
  -7   1  -2  150.79    5.09
  -7   1  -3  175.67    5.89
  -7   1  -3  167.74    7.66
  -7   1  -3  181.84    5.67
  -7   1  -4   -0.05    0.49
  -7   1  -4   -0.34    0.62
  -7   1  -5   52.98    2.76
  -7   1  -5   54.45    2.55
  -7   1  -6    1.42    0.49
  -7   1  -6    2.01    0.56
  -7   1  -7  142.91    5.00
  -7   1  -7  143.67    4.71
  -7   1  -8  101.54    3.90
  -7   1  -9    7.30    0.94
  -7   1 -10  185.67    5.68
   7  -1  11    1.60    0.68
  -7   1 -11    0.98    0.44
   7  -1  12    0.86    0.48
  -7   1 -12    1.42    0.41
  -7   1 -13    2.56    0.42
   7  -1  13    2.83    0.54
   7  -1  14   20.15    1.09
  -7   0  14   23.20    1.28
  -7   0  13   57.98    2.47
  -7   0  12   35.55    1.87
  -7   0  11   50.21    2.51
  -7   0  10  131.41    4.81
  -7   0   9  249.58    7.75
  -7   0   8  368.17   10.51
  -7   0   7   -0.15    0.54
  -7   0   7    0.42    0.33
  -7   0   6   -0.22    0.61
  -7   0   6    0.14    0.33
  -7   0   5    5.25    0.88
  -7   0   5    5.76    0.83
  -7   0   4    1.49    0.49
  -7   0   4    0.90    0.46
  -7   0   3   48.60    2.65
  -7   0   3   51.76    3.31
  -7   0   3   48.87    2.60
  -7   0   2   14.11    1.39
  -7   0   2   14.75    1.75
  -7   0   2   14.08    1.33
  -7   0   1  345.13    9.79
  -7   0   1  372.66   11.58
  -7   0   1  352.06    9.75
  -7   0   0   52.55    2.68
  -7   0   0   50.52    2.60
  -7   0   0   54.56    3.68
  -7   0   0   53.56    2.66
  -7   0  -1   40.39    2.30
  -7   0  -1   34.89    2.12
  -7   0  -1   35.52    3.02
  -7   0  -1   37.88    2.16
  -7   0  -2  632.80   15.59
  -7   0  -2  603.28   15.48
  -7   0  -2  602.15   17.82
  -7   0  -2  620.07   15.31
  -7   0  -3    0.41    0.93
  -7   0  -3    0.83    0.51
  -7   0  -3    0.71    0.46
  -7   0  -4  533.19   13.70
  -7   0  -4  504.27   16.01
  -7   0  -4  537.14   13.39
  -7   0  -5   13.61    1.34
  -7   0  -5   12.75    1.91
  -7   0  -5   12.70    1.20
  -7   0  -6  157.65    5.47
  -7   0  -6  168.48    5.30
  -7   0  -7  217.55    6.78
  -7   0  -7  220.67    6.51
  -7   0  -8   88.24    3.69
  -7   0  -8   99.45    3.60
  -7   0  -9  381.51   10.23
  -7   0 -10    2.50    0.62
   7   0  11   48.11    2.57
  -7   0 -11   49.49    2.31
   7   0  12    5.97    0.84
  -7   0 -12    4.70    0.65
   7   0  13   34.09    1.73
  -7   0 -13   31.16    1.52
   7   0  14   -0.78    0.34
  -7  -1  14   47.86    1.97
  -7  -1  13    0.68    0.36
  -7  -1  12  105.65    3.86
  -7  -1  11   90.76    3.74
  -7  -1  10   62.66    3.15
  -7  -1   9    2.93    0.93
  -7  -1   8  187.79    6.54
  -7  -1   7    2.34    0.74
  -7  -1   6    5.77    0.99
  -7  -1   6    6.83    0.87
  -7  -1   5    2.84    0.76
  -7  -1   5    3.42    0.69
  -7  -1   4   35.39    2.26
  -7  -1   4   34.95    2.11
  -7  -1   3   20.80    1.70
  -7  -1   3   19.80    1.58
  -7  -1   2  578.41   14.97
  -7  -1   2  611.76   16.61
  -7  -1   2  576.81   14.74
  -7  -1   1   54.97    2.82
  -7  -1   1   58.16    3.65
  -7  -1   1   58.25    2.81
  -7  -1   0   33.76    2.10
  -7  -1   0   28.40    1.82
  -7  -1   0   34.04    2.78
  -7  -1   0   31.20    1.94
  -7  -1  -1   51.21    2.63
  -7  -1  -1   45.28    2.41
  -7  -1  -1   47.16    3.42
  -7  -1  -1   48.20    2.45
  -7  -1  -2   32.28    2.06
  -7  -1  -2   29.16    1.91
  -7  -1  -2   29.32    2.79
  -7  -1  -2   30.24    1.87
  -7  -1  -3  287.58    8.30
  -7  -1  -3  279.11    8.18
  -7  -1  -3  275.40   10.16
  -7  -1  -3  281.20    7.98
  -7  -1  -4   12.95    1.29
  -7  -1  -4   12.92    1.98
  -7  -1  -4   13.55    1.25
  -7  -1  -5  154.44    5.27
  -7  -1  -5  150.02    6.98
  -7  -1  -5  152.06    5.05
  -7  -1  -6  434.97   11.41
  -7  -1  -6  404.20   13.54
  -7  -1  -6  424.27   11.09
  -7  -1  -7  343.09    9.54
  -7  -1  -7  341.84    9.26
  -7  -1  -8  109.63    4.18
  -7  -1  -8  109.95    3.98
  -7  -1  -9   83.60    3.46
  -7  -1 -10   64.48    2.89
   7   1  11   24.55    1.80
  -7  -1 -11   23.51    1.57
   7   1  12   30.73    1.83
  -7  -1 -12   32.63    1.75
   7   1  13   24.22    1.45
  -7  -1 -13   26.75    1.43
   7   1  14   11.10    0.84
  -7  -1 -14   12.06    0.80
  -7  -2  14   10.00    0.82
  -7  -2  13   42.66    2.03
  -7  -2  12    3.32    0.64
  -7  -2  11   93.77    3.91
  -7  -2  10    0.88    0.52
  -7  -2   9  507.23   13.79
  -7  -2   8   16.96    1.70
  -7  -2   7    7.02    1.15
  -7  -2   6   26.50    2.07
  -7  -2   5   42.19    2.61
  -7  -2   5   43.32    2.27
  -7  -2   4    7.08    1.06
  -7  -2   4    6.87    0.91
  -7  -2   3  351.60    9.89
  -7  -2   3  338.88    9.40
  -7  -2   3  337.57    8.85
  -7  -2   2   35.62    2.28
  -7  -2   2   32.85    1.80
  -7  -2   2   39.18    2.21
  -7  -2   1  291.25    8.55
  -7  -2   1  313.88   10.10
  -7  -2   1  306.03    8.36
  -7  -2   0   -0.01    0.50
  -7  -2   0    0.43    0.60
  -7  -2   0    0.76    0.44
  -7  -2  -1   28.52    1.94
  -7  -2  -1   27.13    1.74
  -7  -2  -1   29.14    2.61
  -7  -2  -1   25.28    1.74
  -7  -2  -2    7.22    1.00
  -7  -2  -2    8.27    1.52
  -7  -2  -2    6.09    0.84
  -7  -2  -2    6.39    0.88
  -7  -2  -3  179.55    5.89
  -7  -2  -3  180.04    5.80
  -7  -2  -3  171.72    7.43
  -7  -2  -3  180.31    5.69
  -7  -2  -4    0.32    0.93
  -7  -2  -4    1.43    0.57
  -7  -2  -4    0.59    0.50
  -7  -2  -5  173.69    5.63
  -7  -2  -5  166.81    5.40
  -7  -2  -6  263.16    7.64
  -7  -2  -6  239.88    9.26
  -7  -2  -6  252.28    7.37
  -7  -2  -7   64.32    3.01
  -7  -2  -7   59.99    2.80
  -7  -2  -8   80.27    3.43
  -7  -2  -8   77.26    3.23
  -7  -2  -9    0.94    0.51
  -7  -2 -10  232.63    6.95
   7   2  11   74.95    3.24
  -7  -2 -11   77.57    3.15
   7   2  12  136.75    4.54
  -7  -2 -12  141.67    4.53
   7   2  13   36.02    1.78
  -7  -2 -13   38.01    1.80
   7   2  14   75.59    2.58
  -7  -2 -14   78.98    2.60
  -7  -3  14    8.57    0.73
  -7  -3  13    9.80    0.95
  -7  -3  12   67.71    3.03
  -7  -3  11   54.87    2.89
  -7  -3  10   32.46    2.25
  -7  -3   9  317.09    9.63
  -7  -3   8   27.68    2.19
  -7  -3   7   81.86    3.94
  -7  -3   7   78.59    3.08
  -7  -3   6   95.40    4.28
  -7  -3   6   92.07    3.40
  -7  -3   5  328.59    9.76
  -7  -3   5  325.44    8.68
  -7  -3   4  126.00    4.94
  -7  -3   4  123.23    4.14
  -7  -3   4  124.14    4.37
  -7  -3   3   12.96    1.37
  -7  -3   3   12.12    1.19
  -7  -3   3   11.87    1.05
  -7  -3   2  672.33   16.40
  -7  -3   2  625.00   15.44
  -7  -3   2  636.68   15.85
  -7  -3   1    0.27    0.46
  -7  -3   1   -0.01    0.39
  -7  -3   1    0.05    0.62
  -7  -3   0   12.04    1.25
  -7  -3   0   12.46    1.18
  -7  -3  -1   28.08    1.94
  -7  -3  -1   29.74    1.80
  -7  -3  -1   30.86    2.72
  -7  -3  -1   31.61    1.92
  -7  -3  -2   40.41    2.30
  -7  -3  -2   36.76    2.10
  -7  -3  -2   41.15    3.22
  -7  -3  -2   40.28    2.20
  -7  -3  -3    2.53    0.72
  -7  -3  -3    1.94    0.54
  -7  -3  -3    2.44    0.92
  -7  -3  -3    2.63    0.62
  -7  -3  -4    1.92    0.75
  -7  -3  -4   -0.08    0.44
  -7  -3  -4    0.24    0.91
  -7  -3  -4    0.49    0.56
  -7  -3  -5    0.70    0.52
  -7  -3  -5    2.04    1.02
  -7  -3  -5    1.18    0.64
  -7  -3  -6   91.31    3.77
  -7  -3  -6   87.93    4.92
  -7  -3  -6   91.09    3.62
  -7  -3  -7    6.19    0.91
  -7  -3  -7    6.95    0.95
  -7  -3  -8    1.93    0.63
  -7  -3  -8    2.12    0.64
  -7  -3  -9  190.99    6.15
   7   3  10   89.28    3.70
  -7  -3 -10  100.44    3.85
   7   3  11  104.96    3.88
  -7  -3 -11  109.73    4.00
   7   3  12  155.55    4.80
  -7  -3 -12  153.01    4.90
   7   3  13  115.14    3.66
  -7  -3 -13  115.75    3.78
  -7  -3 -14   17.70    1.08
  -7  -4  14   12.34    0.88
  -7  -4  13   68.96    2.76
  -7  -4  12    0.78    0.41
  -7  -4  11   77.53    3.52
  -7  -4  10   31.62    2.25
  -7  -4   9    0.13    0.53
  -7  -4   8  108.15    4.71
  -7  -4   7   71.15    3.69
  -7  -4   7   69.44    2.92
  -7  -4   6  234.66    7.78
  -7  -4   6  241.89    6.82
  -7  -4   6  224.20    7.05
  -7  -4   5   52.23    3.01
  -7  -4   5   53.07    2.45
  -7  -4   5   52.41    2.62
  -7  -4   4   21.53    1.82
  -7  -4   4   19.55    1.40
  -7  -4   4   16.89    1.37
  -7  -4   3   78.92    3.65
  -7  -4   3   77.98    3.21
  -7  -4   3   76.74    3.13
  -7  -4   3   76.16    3.09
  -7  -4   2   95.82    4.04
  -7  -4   2   99.22    3.64
  -7  -4   2   96.29    3.74
  -7  -4   1  473.84   12.42
  -7  -4   1  475.25   12.11
  -7  -4   1  449.72   11.79
  -7  -4   0  312.19    9.03
  -7  -4   0  319.76    8.86
  -7  -4  -1   15.93    1.41
  -7  -4  -1   15.73    1.36
  -7  -4  -2   37.28    2.08
  -7  -4  -2   37.69    2.20
  -7  -4  -2   39.82    2.22
  -7  -4  -3    2.68    0.70
  -7  -4  -3    2.15    0.56
  -7  -4  -3    1.84    0.63
  -7  -4  -4    1.01    0.59
  -7  -4  -4    0.16    0.41
  -7  -4  -4    0.23    0.57
  -7  -4  -5  110.55    4.14
  -7  -4  -5  106.46    4.17
  -7  -4  -6   59.86    2.83
  -7  -4  -6   58.12    2.89
  -7  -4  -7   17.07    1.46
  -7  -4  -7   18.06    1.55
  -7  -4  -8    3.09    0.73
  -7  -4  -9   45.98    2.54
  -7  -4 -10    4.85    0.86
  -7  -4 -11  158.89    5.22
  -7  -4 -12   11.68    1.10
  -7  -4 -13   18.65    1.27
  -7  -4 -14   34.65    1.61
  -7  -5  13    2.69    0.52
  -7  -5  12   51.57    2.52
  -7  -5  11    0.80    0.51
  -7  -5  10   19.14    1.71
  -7  -5   9   10.32    1.34
  -7  -5   8   51.28    3.06
  -7  -5   8   53.81    2.68
  -7  -5   7   19.31    1.89
  -7  -5   7   22.55    1.69
  -7  -5   7   21.07    1.55
  -7  -5   6   17.83    1.74
  -7  -5   6   18.17    1.42
  -7  -5   6   18.71    1.52
  -7  -5   5   55.11    3.12
  -7  -5   5   57.03    2.62
  -7  -5   5   55.29    2.73
  -7  -5   4  239.23    7.63
  -7  -5   4  238.15    6.84
  -7  -5   4  223.46    6.89
  -7  -5   3   19.01    1.69
  -7  -5   3   21.91    1.52
  -7  -5   3   20.05    1.46
  -7  -5   2  158.21    5.57
  -7  -5   2  156.22    5.09
  -7  -5   2  155.76    5.15
  -7  -5   1  405.70   10.94
  -7  -5   1  390.07   10.42
  -7  -5   1  396.81   10.59
  -7  -5   0   15.68    1.41
  -7  -5   0   16.50    1.40
  -7  -5  -1  194.28    6.23
  -7  -5  -1  198.94    6.21
  -7  -5  -2  132.89    4.69
  -7  -5  -2  130.75    4.70
  -7  -5  -3    6.80    0.92
  -7  -5  -3    6.94    0.89
  -7  -5  -3    8.58    1.10
  -7  -5  -4  514.86   12.89
  -7  -5  -4  514.06   13.04
  -7  -5  -4  477.94   12.94
  -7  -5  -5   70.26    3.20
  -7  -5  -5   76.23    3.36
  -7  -5  -6    1.24    0.49
  -7  -5  -6    1.62    0.72
  -7  -5  -7    5.35    0.91
  -7  -5  -8    9.23    1.17
  -7  -5  -9   12.09    1.30
  -7  -5 -10   48.96    2.60
  -7  -5 -11   82.58    3.41
  -7  -5 -12   96.52    3.59
  -7  -5 -13   86.47    3.14
  -7  -5 -14   12.13    0.91
  -7  -6  13  179.21    5.16
  -7  -6  12   29.93    1.78
  -7  -6  11   19.69    1.57
  -7  -6  10   13.41    1.42
  -7  -6   9    3.32    0.84
  -7  -6   9    2.54    0.60
  -7  -6   8   96.39    4.36
  -7  -6   8  101.40    3.93
  -7  -6   7   16.08    1.62
  -7  -6   7   14.94    1.36
  -7  -6   7   15.48    1.35
  -7  -6   6   92.14    4.27
  -7  -6   6   93.52    3.66
  -7  -6   6   96.14    3.84
  -7  -6   5   70.94    3.61
  -7  -6   5   72.81    3.14
  -7  -6   5   73.96    3.23
  -7  -6   4  209.86    7.11
  -7  -6   4  218.86    6.51
  -7  -6   4  214.06    6.57
  -7  -6   3    0.24    0.47
  -7  -6   3    0.48    0.42
  -7  -6   3    0.83    0.41
  -7  -6   2  107.17    4.32
  -7  -6   2  104.74    3.95
  -7  -6   1    9.23    1.11
  -7  -6   1    8.72    1.00
  -7  -6   1    9.81    1.14
  -7  -6   0  444.58   11.45
  -7  -6   0  425.06   11.24
  -7  -6   0  404.70   11.06
  -7  -6  -1  186.09    5.93
  -7  -6  -1  179.84    5.91
  -7  -6  -2   51.25    2.54
  -7  -6  -2   49.88    2.62
  -7  -6  -3  114.89    4.21
  -7  -6  -3  123.51    4.54
  -7  -6  -3  121.93    4.39
  -7  -6  -4  392.04   10.58
  -7  -6  -4  401.64   10.28
  -7  -6  -5   44.69    2.51
  -7  -6  -5   41.16    2.43
  -7  -6  -6   97.01    4.02
  -7  -6  -7   80.47    3.61
  -7  -6  -8   53.89    2.85
  -7  -6  -9    8.14    1.07
  -7  -6 -10   30.37    1.99
  -7  -6 -11    4.75    0.81
  -7  -6 -12   26.64    1.67
  -7  -6 -13    1.09    0.44
  -7  -6 -14   26.07    1.37
  -7  -7  13    5.44    0.61
  -7  -7  12   92.13    3.32
  -7  -7  11    0.64    0.39
  -7  -7  10   62.85    3.04
  -7  -7   9  117.69    4.71
  -7  -7   9  121.36    4.24
  -7  -7   8    7.85    1.17
  -7  -7   8   10.10    1.08
  -7  -7   7    4.91    0.89
  -7  -7   7    5.36    0.97
  -7  -7   7    5.06    0.82
  -7  -7   6   14.11    1.31
  -7  -7   6   11.95    1.40
  -7  -7   6   12.38    1.10
  -7  -7   6   13.73    1.29
  -7  -7   5   87.41    4.06
  -7  -7   5   93.67    3.67
  -7  -7   5   91.34    3.43
  -7  -7   5   91.20    3.69
  -7  -7   4   62.77    3.28
  -7  -7   4   72.79    3.10
  -7  -7   4   67.06    2.81
  -7  -7   4   68.75    3.05
  -7  -7   3   86.09    3.81
  -7  -7   3   85.71    3.48
  -7  -7   3   83.02    3.40
  -7  -7   3   86.43    3.27
  -7  -7   2    0.25    0.37
  -7  -7   2   -0.04    0.51
  -7  -7   2    0.02    0.40
  -7  -7   1   -0.44    0.46
  -7  -7   1    0.38    0.30
  -7  -7   1    0.08    0.45
  -7  -7   0  154.36    5.27
  -7  -7   0  161.15    5.01
  -7  -7   0  152.64    5.22
  -7  -7   0  154.25    5.21
  -7  -7  -1  267.53    7.71
  -7  -7  -1  265.20    7.48
  -7  -7  -1  262.88    7.83
  -7  -7  -2   37.92    2.09
  -7  -7  -2   33.96    1.96
  -7  -7  -2   38.31    2.29
  -7  -7  -3   59.68    2.77
  -7  -7  -3   62.72    3.03
  -7  -7  -3   66.64    2.94
  -7  -7  -4   17.51    1.51
  -7  -7  -5  376.79   10.44
  -7  -7  -6    1.92    0.65
  -7  -7  -7  166.56    5.79
  -7  -7  -8   33.21    2.19
  -7  -7  -9   10.11    1.18
  -7  -7 -10    6.94    0.99
  -7  -7 -11    0.76    0.48
  -7  -7 -12   28.42    1.72
  -7  -7 -13   97.30    3.39
  -7  -7 -14   20.41    1.16
  -7  -8  12   29.73    1.51
  -7  -8  11    1.32    0.46
  -7  -8  10    8.43    1.00
  -7  -8  10    9.54    0.91
  -7  -8   9    9.61    1.15
  -7  -8   9    9.23    0.95
  -7  -8   8   41.70    2.54
  -7  -8   8   46.50    2.32
  -7  -8   7  143.33    5.45
  -7  -8   7  155.44    5.08
  -7  -8   6    1.97    0.70
  -7  -8   6    2.37    0.69
  -7  -8   6    2.39    0.58
  -7  -8   6    1.62    0.50
  -7  -8   5  209.59    7.05
  -7  -8   5  221.40    6.59
  -7  -8   5  212.86    6.36
  -7  -8   5  214.37    6.59
  -7  -8   4    5.81    0.98
  -7  -8   4    3.91    0.69
  -7  -8   4    4.44    0.82
  -7  -8   3  162.41    5.73
  -7  -8   3  163.91    5.45
  -7  -8   3  170.33    5.44
  -7  -8   3  168.13    5.27
  -7  -8   2   70.51    2.95
  -7  -8   2   70.77    3.27
  -7  -8   2   70.95    3.12
  -7  -8   1   77.14    3.37
  -7  -8   1   80.22    3.20
  -7  -8   1   80.15    3.37
  -7  -8   0   17.92    1.45
  -7  -8   0   18.48    1.42
  -7  -8   0   17.45    1.46
  -7  -8  -1  351.84    9.53
  -7  -8  -1  357.92    9.78
  -7  -8  -2   28.01    1.79
  -7  -8  -3   -0.08    0.46
  -7  -8  -4  221.60    6.98
  -7  -8  -4  247.77    7.21
  -7  -8  -5   25.22    1.83
  -7  -8  -6  233.88    7.33
  -7  -8  -7   98.93    4.11
  -7  -8  -8   34.85    2.24
  -7  -8  -9  130.75    4.84
  -7  -8 -10   27.78    1.87
  -7  -8 -11    0.57    0.49
  -7  -8 -12  119.01    4.06
  -7  -8 -13    3.42    0.56
   7   8  13    3.83    0.60
  -7  -8 -14   48.16    1.88
   7   8  14   48.95    1.92
  -7  -9  11   79.75    2.82
  -7  -9  10   19.17    1.34
  -7  -9  10   19.39    1.21
  -7  -9   9   23.69    1.64
  -7  -9   9   24.45    1.48
  -7  -9   8   32.83    2.06
  -7  -9   8   35.32    1.91
  -7  -9   7  180.60    6.17
  -7  -9   7  198.57    5.92
  -7  -9   6   59.94    3.05
  -7  -9   6   63.05    2.75
  -7  -9   6   64.76    2.88
  -7  -9   6   67.59    2.92
  -7  -9   5   41.10    2.42
  -7  -9   5   40.85    2.22
  -7  -9   5   39.38    2.11
  -7  -9   5   38.19    2.16
  -7  -9   4   66.98    3.20
  -7  -9   4   70.69    3.06
  -7  -9   4   69.89    2.96
  -7  -9   4   68.96    3.02
  -7  -9   3   67.15    3.16
  -7  -9   3   72.82    3.13
  -7  -9   3   70.91    2.99
  -7  -9   3   70.47    3.03
  -7  -9   2   37.13    2.14
  -7  -9   2   37.21    2.04
  -7  -9   2   37.35    2.06
  -7  -9   1   31.34    1.88
  -7  -9   1   30.07    1.92
  -7  -9   0    8.62    0.99
  -7  -9   0    9.31    1.08
  -7  -9  -1    3.72    0.76
  -7  -9  -1    3.84    0.70
  -7  -9  -2   -0.08    0.42
  -7  -9  -2   -0.02    0.37
  -7  -9  -3   83.23    3.48
  -7  -9  -4   20.99    1.63
  -7  -9  -4   25.67    1.75
  -7  -9  -5   56.04    2.82
  -7  -9  -5   59.85    2.90
  -7  -9  -6    5.55    0.95
  -7  -9  -7   12.23    1.33
  -7  -9  -8  355.92   10.05
  -7  -9  -9   13.05    1.32
  -7  -9 -10  112.18    4.19
  -7  -9 -11   71.75    2.95
   7   9  11   60.08    2.74
  -7  -9 -12   14.92    1.17
   7   9  12   15.55    1.18
  -7  -9 -13  129.27    3.92
   7   9  13  124.54    3.87
  -7 -10  10   -0.38    0.30
  -7 -10   9    2.18    0.46
  -7 -10   9    1.97    0.44
  -7 -10   8  147.00    4.92
  -7 -10   8  171.85    4.92
  -7 -10   7   79.96    3.35
  -7 -10   7   93.79    3.35
  -7 -10   6  212.41    6.67
  -7 -10   6  229.38    6.52
  -7 -10   6  232.72    6.60
  -7 -10   5    0.59    0.51
  -7 -10   5   -0.38    0.46
  -7 -10   5    0.70    0.44
  -7 -10   5   -0.11    0.34
  -7 -10   4    8.21    0.98
  -7 -10   4    7.56    0.93
  -7 -10   4    8.31    0.96
  -7 -10   3    8.00    0.96
  -7 -10   3    6.74    0.86
  -7 -10   3    8.09    0.94
  -7 -10   2    3.97    0.69
  -7 -10   2    4.24    0.76
  -7 -10   2    3.57    0.63
  -7 -10   1    7.19    0.94
  -7 -10   1    7.32    0.95
  -7 -10   0   55.12    2.65
  -7 -10   0   57.40    2.71
  -7 -10  -1  170.90    5.52
  -7 -10  -1  165.72    5.46
  -7 -10  -2  221.08    6.85
  -7 -10  -2  236.55    6.96
  -7 -10  -3    0.13    0.48
  -7 -10  -3   -0.17    0.54
  -7 -10  -4    4.19    0.77
  -7 -10  -4    3.20    0.64
  -7 -10  -5   82.29    3.58
  -7 -10  -5   91.37    3.65
  -7 -10  -6   85.47    3.62
  -7 -10  -6   86.77    3.64
  -7 -10  -7   85.92    3.59
  -7 -10  -7   82.67    3.57
   7  10   7   80.01    3.30
  -7 -10  -8  173.76    5.58
   7  10   8  149.23    5.12
  -7 -10  -9  129.78    4.49
   7  10   9  107.87    4.07
  -7 -10 -10    1.28    0.51
   7  10  10    0.97    0.38
  -7 -10 -11   59.10    2.52
   7  10  11   48.52    2.26
  -7 -10 -12  103.21    3.35
   7  10  12   86.95    3.11
   7  10  13   35.08    1.51
  -7 -11   9   37.58    1.60
  -7 -11   8    2.69    0.45
  -7 -11   7  151.10    4.57
  -7 -11   6   13.91    1.12
  -7 -11   6   13.97    1.11
  -7 -11   5   95.89    3.48
  -7 -11   5   93.77    3.44
  -7 -11   4   10.19    1.02
  -7 -11   4    8.95    0.93
  -7 -11   4    9.58    1.00
  -7 -11   3   16.37    1.32
  -7 -11   3   16.07    1.30
  -7 -11   3   16.95    1.27
  -7 -11   2   85.90    3.34
  -7 -11   2   83.99    3.23
  -7 -11   2   94.11    3.49
  -7 -11   1  359.61    9.46
  -7 -11   1  341.18    9.30
  -7 -11   0  131.11    4.52
  -7 -11   0  127.27    4.39
  -7 -11  -1   54.85    2.63
  -7 -11  -1   52.85    2.52
  -7 -11  -2    2.68    0.60
  -7 -11  -2    3.21    0.68
  -7 -11  -3   33.74    2.05
  -7 -11  -3   33.82    1.97
  -7 -11  -4    3.27    0.65
  -7 -11  -4    5.54    0.84
  -7 -11  -5   20.53    1.59
  -7 -11  -5   23.60    1.60
  -7 -11  -5   19.53    1.46
  -7 -11  -6    0.41    0.40
  -7 -11  -6    0.22    0.44
  -7 -11  -6   -0.28    0.47
  -7 -11  -7   99.44    3.70
  -7 -11  -7  107.36    4.00
  -7 -11  -7  109.31    4.01
   7  11   7   96.00    3.54
  -7 -11  -8   34.82    2.01
  -7 -11  -8   31.55    1.94
   7  11   8   28.02    1.67
  -7 -11  -9   -0.12    0.35
   7  11   9    0.02    0.30
  -7 -11 -10   -0.12    0.40
  -7 -11 -10    0.09    0.30
   7  11  10    0.54    0.35
  -7 -11 -11   42.69    1.95
   7  11  11   41.67    1.83
  -7 -11 -11   38.23    1.62
  -7 -11 -12   12.28    0.88
  -7 -12   8   62.42    2.15
  -7 -12   7    3.58    0.51
  -7 -12   6   27.36    1.45
  -7 -12   5    8.21    0.84
  -7 -12   5    6.97    0.74
  -7 -12   4    1.04    0.44
  -7 -12   4    1.54    0.43
  -7 -12   3  146.32    4.56
  -7 -12   3  138.18    4.35
  -7 -12   3  132.79    4.33
  -7 -12   2   15.50    1.20
  -7 -12   2   17.05    1.29
  -7 -12   1   57.69    2.50
  -7 -12   1   62.96    2.70
  -7 -12   0  206.73    6.08
  -7 -12   0  194.56    5.81
  -7 -12  -1    1.19    0.65
  -7 -12  -1    0.56    0.49
  -7 -12  -2  242.53    6.94
  -7 -12  -2  229.21    6.62
  -7 -12  -3   36.02    2.04
  -7 -12  -3   34.67    1.86
  -7 -12  -4   14.01    1.14
  -7 -12  -4   16.96    1.38
  -7 -12  -5    0.33    0.29
  -7 -12  -5    0.15    0.37
  -7 -12  -6   14.08    1.11
  -7 -12  -6   15.29    1.29
  -7 -12  -7    0.28    0.29
  -7 -12  -7    0.46    0.41
  -7 -12  -8    0.29    0.32
  -7 -12  -8    0.26    0.25
  -7 -12  -9   -0.08    0.34
   7  12   9   -0.08    0.25
  -7 -12 -10   50.47    2.09
   7  12  10   42.23    1.78
  -7 -12 -11   -0.01    0.22
  -7 -13   6    1.41    0.31
  -7 -13   5    1.25    0.32
  -7 -13   4   62.62    2.40
  -7 -13   4   58.58    2.23
  -7 -13   3   10.87    0.96
  -7 -13   3    9.12    0.79
  -7 -13   2   31.52    1.69
  -7 -13   1   39.44    1.93
  -7 -13   1   36.39    1.74
  -7 -13   0    7.69    0.78
  -7 -13   0    8.11    0.89
  -7 -13  -1  181.83    5.30
  -7 -13  -1  163.74    4.90
  -7 -13  -2   43.05    2.10
  -7 -13  -2   40.99    1.88
  -7 -13  -3   14.42    1.17
  -7 -13  -3   13.85    1.02
  -7 -13  -4   14.11    1.16
  -7 -13  -4   13.85    1.00
  -7 -13  -5    6.28    0.79
  -7 -13  -6   16.74    1.25
  -7 -13  -7   54.92    2.37
  -7 -13  -8    5.63    0.68
  -7 -13  -9   21.21    1.25
  -7 -14   3   37.16    1.65
  -7 -14   2    9.00    0.80
  -7 -14   1    2.46    0.47
  -7 -14   0   63.11    2.45
  -7 -14  -1  123.94    3.92
  -7 -14  -2    6.16    0.71
  -7 -14  -3   19.26    1.24
  -7 -14  -4    2.87    0.51
  -7 -14  -5   36.12    1.73
  -7 -14  -6    6.47    0.69
  -7 -14  -7   15.71    1.03
  -7 -14  -8   21.57    1.15
  -7 -15   1   35.16    1.48
  -7 -15   0   43.18    1.73
  -7 -15  -1    9.85    0.77
  -7 -15  -2   77.63    2.59
  -7 -15  -3   26.66    1.32
  -7 -15  -4   28.10    1.33
  -8   8   5   79.00    2.61
  -8   8   4   34.93    1.56
  -8   8   3   32.48    1.46
  -8   8   3   33.79    1.51
  -8   8   2    4.49    0.53
  -8   8   2    4.72    0.53
  -8   8   1    3.41    0.50
  -8   8   1    2.56    0.37
  -8   8   0    1.78    0.38
  -8   8  -1   45.07    1.89
  -8   8  -2    0.74    0.30
  -8   8  -3   13.13    0.87
  -8   7   7   58.01    2.18
  -8   7   6   25.78    1.41
  -8   7   5  112.16    3.66
  -8   7   4   58.15    2.21
  -8   7   4   65.13    2.52
  -8   7   3   10.64    0.89
  -8   7   3   11.13    0.96
  -8   7   2    0.33    0.31
  -8   7   2    0.07    0.30
  -8   7   1    1.40    0.43
  -8   7   1    1.27    0.35
  -8   7   0    1.71    0.45
  -8   7   0    1.00    0.31
  -8   7  -1    0.01    0.32
  -8   7  -1   -0.65    0.39
  -8   7  -2   21.21    1.36
  -8   7  -3   68.56    2.62
  -8   7  -4    0.78    0.36
  -8   7  -5   43.28    1.76
  -8   6   8   36.28    1.65
  -8   6   7    0.30    0.28
  -8   6   6   99.62    3.49
  -8   6   5   15.69    1.23
  -8   6   4   69.21    2.88
  -8   6   3    3.41    0.56
  -8   6   3    3.81    0.65
  -8   6   2    0.51    0.34
  -8   6   2   -0.37    0.33
  -8   6   1    4.85    0.73
  -8   6   1    5.23    0.72
  -8   6   0    1.92    0.55
  -8   6   0    1.94    0.47
  -8   6  -1    2.98    0.64
  -8   6  -1    2.71    0.49
  -8   6  -2  142.53    4.60
  -8   6  -2  132.08    4.08
  -8   6  -3    5.45    0.79
  -8   6  -4   68.17    2.73
  -8   6  -5    1.62    0.43
  -8   6  -6    0.53    0.34
  -8   6  -7   56.69    2.04
  -8   5  10   36.80    1.69
  -8   5   9   -0.05    0.30
  -8   5   9    0.33    0.25
  -8   5   8    2.42    0.56
  -8   5   8    2.39    0.48
  -8   5   7   75.69    3.05
  -8   5   7   80.04    3.02
  -8   5   6   69.20    2.88
  -8   5   6   68.09    2.88
  -8   5   5  116.98    4.01
  -8   5   5  110.85    4.07
  -8   5   4    1.41    0.47
  -8   5   4    0.44    0.46
  -8   5   3   23.22    1.50
  -8   5   3   24.03    1.66
  -8   5   2    7.97    0.94
  -8   5   2    6.51    0.88
  -8   5   1    0.11    0.35
  -8   5   1    0.27    0.48
  -8   5   0   21.17    1.57
  -8   5   0   21.91    1.52
  -8   5  -1   19.98    1.53
  -8   5  -1   19.58    1.38
  -8   5  -2    3.19    0.70
  -8   5  -2    2.25    0.50
  -8   5  -3  233.52    6.80
  -8   5  -3  223.21    6.25
  -8   5  -4   15.52    1.29
  -8   5  -5    3.14    0.59
  -8   5  -6   23.51    1.42
  -8   5  -7   24.11    1.36
  -8   5  -8   28.98    1.38
   8  -5   9   25.64    1.32
  -8   4  11    8.79    0.78
  -8   4  10   29.77    1.62
  -8   4   9    1.30    0.44
  -8   4   9    1.20    0.35
  -8   4   8   33.45    1.92
  -8   4   8   32.91    1.72
  -8   4   7   13.86    1.25
  -8   4   7   14.28    1.19
  -8   4   6  164.42    5.31
  -8   4   6  159.23    5.22
  -8   4   5   13.79    1.24
  -8   4   5   12.66    1.23
  -8   4   4   40.38    2.14
  -8   4   4   39.85    2.28
  -8   4   3   93.91    3.53
  -8   4   3   96.90    3.87
  -8   4   2    9.86    1.05
  -8   4   2    9.54    1.14
  -8   4   1  109.83    4.11
  -8   4   1  106.64    4.10
  -8   4   0   44.76    2.40
  -8   4   0   39.10    2.22
  -8   4  -1    0.33    0.46
  -8   4  -1    0.72    0.49
  -8   4  -2  208.56    6.37
  -8   4  -2  187.41    5.88
  -8   4  -3   23.93    1.73
  -8   4  -3   22.52    1.48
  -8   4  -4  145.29    4.89
  -8   4  -4  137.73    4.40
  -8   4  -5    5.06    0.78
  -8   4  -6    4.33    0.67
  -8   4  -7   11.18    0.98
  -8   4  -8    8.42    0.79
   8  -4   9    1.23    0.49
  -8   4  -9    0.04    0.25
   8  -4  10    7.35    0.71
  -8   3  11    3.84    0.57
  -8   3  10    2.05    0.50
  -8   3   9    6.79    0.90
  -8   3   9    5.43    0.64
  -8   3   8   17.81    1.43
  -8   3   8   16.80    1.23
  -8   3   7  109.84    4.14
  -8   3   7  110.45    3.96
  -8   3   6   25.84    1.78
  -8   3   6   24.49    1.71
  -8   3   5   11.29    1.16
  -8   3   5    8.88    1.07
  -8   3   4  194.56    5.92
  -8   3   4  177.43    6.01
  -8   3   3    1.88    0.63
  -8   3   2  184.58    5.93
  -8   3   2  200.09    6.30
  -8   3   1   19.43    1.54
  -8   3   1   22.86    1.71
  -8   3   0    6.51    0.94
  -8   3   0    7.99    1.07
  -8   3  -1  181.80    6.05
  -8   3  -1  188.42    5.95
  -8   3  -2   29.02    1.99
  -8   3  -2   28.91    1.85
  -8   3  -3  166.13    5.55
  -8   3  -3  156.23    5.13
  -8   3  -4    3.15    0.76
  -8   3  -4    1.83    0.50
  -8   3  -5   10.11    1.11
  -8   3  -5    9.69    0.93
  -8   3  -6    6.19    0.83
  -8   3  -7    9.13    0.97
  -8   3  -8    5.25    0.70
  -8   3  -9    3.15    0.54
   8  -3  10    6.97    0.81
  -8   3 -10    5.58    0.60
   8  -3  11   46.68    1.85
  -8   2  12    7.55    0.72
  -8   2  11    1.21    0.41
  -8   2  10   31.65    1.84
  -8   2   9    4.41    0.79
  -8   2   9    4.43    0.58
  -8   2   8  176.86    5.78
  -8   2   8  178.46    5.34
  -8   2   7    0.98    0.49
  -8   2   7    2.13    0.55
  -8   2   6  157.19    5.22
  -8   2   6  165.55    5.50
  -8   2   6  165.34    5.41
  -8   2   5    0.24    0.39
  -8   2   5    1.04    0.50
  -8   2   5    0.03    0.45
  -8   2   4   13.44    1.30
  -8   2   4   12.50    1.21
  -8   2   4   13.01    1.30
  -8   2   3   70.48    3.14
  -8   2   3   68.01    3.23
  -8   2   2   31.34    1.99
  -8   2   2   29.70    2.05
  -8   2   1   91.87    3.71
  -8   2   1   97.50    3.97
  -8   2   0   17.62    1.49
  -8   2   0   18.89    1.60
  -8   2  -1    3.81    0.76
  -8   2  -1    3.98    0.81
  -8   2  -2   27.48    1.94
  -8   2  -2   29.54    1.92
  -8   2  -3  511.16   13.48
  -8   2  -3  523.71   13.18
  -8   2  -4   66.34    3.12
  -8   2  -4   64.97    2.86
  -8   2  -5    8.17    1.02
  -8   2  -5    6.75    0.85
  -8   2  -6   13.22    1.26
  -8   2  -6   11.78    1.05
  -8   2  -7   74.54    3.09
  -8   2  -8    2.52    0.59
  -8   2  -9   15.25    1.17
   8  -2  10  100.83    3.72
  -8   2 -10  111.93    3.49
   8  -2  11    4.73    0.65
  -8   2 -11    3.67    0.47
  -8   1  12    3.01    0.51
  -8   1  11    4.64    0.68
  -8   1  10    7.24    0.92
  -8   1   9  108.91    3.84
  -8   1   9  115.67    4.23
  -8   1   8    0.89    0.43
  -8   1   8    0.64    0.56
  -8   1   8    0.54    0.41
  -8   1   7  264.75    7.97
  -8   1   7  280.83    8.22
  -8   1   7  290.56    7.87
  -8   1   6   10.47    1.16
  -8   1   6    9.78    1.12
  -8   1   6    9.71    1.09
  -8   1   5   -0.18    0.42
  -8   1   5    0.61    0.45
  -8   1   5    0.05    0.43
  -8   1   4    0.82    0.54
  -8   1   4    0.32    0.38
  -8   1   4   -0.09    0.47
  -8   1   3  145.46    5.11
  -8   1   3  139.80    5.12
  -8   1   2   88.49    3.72
  -8   1   2   87.53    3.76
  -8   1   1   12.67    1.34
  -8   1   1   10.88    1.11
  -8   1   1   11.76    1.30
  -8   1   0   15.36    1.48
  -8   1   0   12.83    1.27
  -8   1   0   14.19    1.41
  -8   1  -1   23.98    1.78
  -8   1  -1   23.41    1.75
  -8   1  -2  358.42   10.08
  -8   1  -2  363.66    9.95
  -8   1  -3   35.63    2.22
  -8   1  -3   32.86    2.05
  -8   1  -4  224.64    7.01
  -8   1  -4  222.34    6.70
  -8   1  -5   22.79    1.74
  -8   1  -5   24.14    1.63
  -8   1  -6  109.13    4.09
  -8   1  -6  101.77    3.75
  -8   1  -7    4.10    0.77
  -8   1  -7    3.76    0.69
  -8   1  -8   77.47    3.15
  -8   1  -9    7.84    0.91
   8  -1  10   88.98    3.55
  -8   1 -10  103.39    3.41
   8  -1  11   80.00    2.97
  -8   1 -11   80.45    2.76
   8  -1  12    2.22    0.41
  -8   0  13   66.38    2.30
  -8   0  12   19.12    1.24
  -8   0  11   10.77    1.02
  -8   0  10   11.07    1.02
  -8   0  10   12.03    1.17
  -8   0   9   41.27    2.25
  -8   0   9   47.50    2.48
  -8   0   8  220.89    6.83
  -8   0   7   -0.08    0.45
  -8   0   7    0.40    0.36
  -8   0   6   74.81    3.44
  -8   0   6   73.28    3.13
  -8   0   5    2.40    0.67
  -8   0   5    2.92    0.67
  -8   0   4  171.05    5.87
  -8   0   4  171.07    5.57
  -8   0   4  165.30    5.67
  -8   0   3    0.23    0.47
  -8   0   3    0.58    0.52
  -8   0   2   20.69    1.75
  -8   0   2   27.25    1.92
  -8   0   1    3.72    0.90
  -8   0   1    1.82    0.70
  -8   0   0  268.27    7.97
  -8   0   0  250.78    7.62
  -8   0   0  275.18    8.01
  -8   0  -1  110.05    4.34
  -8   0  -1  108.88    4.23
  -8   0  -1  117.84    4.39
  -8   0  -2    3.93    0.77
  -8   0  -2    1.04    0.53
  -8   0  -3  229.18    7.13
  -8   0  -3  231.39    6.99
  -8   0  -4  174.70    5.89
  -8   0  -4  178.65    5.74
  -8   0  -5    3.40    0.80
  -8   0  -5    1.47    0.55
  -8   0  -6  189.93    6.07
  -8   0  -6  185.31    5.78
  -8   0  -7   27.03    1.81
  -8   0  -7   25.16    1.63
  -8   0  -8   92.22    3.54
  -8   0  -8   83.84    3.20
  -8   0  -9   97.52    3.61
   8   0  10    7.97    0.99
  -8   0 -10    8.00    0.87
   8   0  11  116.18    3.89
  -8   0 -11  117.87    3.75
   8   0  12   15.49    1.03
  -8   0 -12   16.58    1.01
  -8  -1  13   14.71    0.94
  -8  -1  12    6.80    0.67
  -8  -1  12    9.58    0.85
  -8  -1  11   16.73    1.22
  -8  -1  11   21.93    1.46
  -8  -1  10   -0.24    0.44
  -8  -1   9    6.04    0.89
  -8  -1   8  168.63    5.78
  -8  -1   7   99.58    4.17
  -8  -1   6    3.58    0.80
  -8  -1   6    4.72    0.73
  -8  -1   5    0.08    0.50
  -8  -1   5    0.09    0.35
  -8  -1   4   29.59    2.12
  -8  -1   4   28.76    1.92
  -8  -1   3    9.09    1.19
  -8  -1   3    9.66    1.13
  -8  -1   2   22.66    1.83
  -8  -1   2   22.07    1.74
  -8  -1   1  584.55   15.15
  -8  -1   1  588.48   15.03
  -8  -1   0    0.83    0.71
  -8  -1   0    0.37    0.58
  -8  -1  -1   89.24    3.85
  -8  -1  -1   89.33    3.64
  -8  -1  -1   95.49    3.84
  -8  -1  -2   17.98    1.61
  -8  -1  -2   15.92    1.43
  -8  -1  -2   17.45    1.50
  -8  -1  -3   17.17    1.48
  -8  -1  -3   16.55    1.47
  -8  -1  -4   79.35    3.48
  -8  -1  -4   79.39    3.39
  -8  -1  -5  220.53    6.81
  -8  -1  -5  210.28    6.55
  -8  -1  -6    0.43    0.53
  -8  -1  -6    0.69    0.55
  -8  -1  -7  153.71    5.23
  -8  -1  -7  152.13    5.00
  -8  -1  -8   28.91    1.77
  -8  -1  -8   35.87    2.06
  -8  -1  -9   26.33    1.74
   8   1  10  110.25    4.16
  -8  -1 -10  136.31    4.28
   8   1  11    9.44    0.93
  -8  -1 -11    9.10    0.88
   8   1  12   35.47    1.63
  -8  -1 -12   36.24    1.65
  -8  -2  13    0.87    0.29
  -8  -2  12   11.75    0.92
  -8  -2  12   14.46    1.07
  -8  -2  11   38.45    1.99
  -8  -2  10  191.05    6.02
  -8  -2   9   12.39    1.29
  -8  -2   8    2.79    0.63
  -8  -2   7    6.77    1.00
  -8  -2   6    9.64    1.27
  -8  -2   5   69.32    3.50
  -8  -2   5   71.77    3.07
  -8  -2   4   93.23    4.11
  -8  -2   4   95.46    3.79
  -8  -2   3   67.09    3.34
  -8  -2   3   65.27    3.07
  -8  -2   2   15.75    1.56
  -8  -2   2   13.71    1.32
  -8  -2   1  287.86    8.57
  -8  -2   1  279.01    8.31
  -8  -2   0  243.05    7.70
  -8  -2   0  261.62    7.73
  -8  -2  -1   22.88    1.79
  -8  -2  -1   23.97    1.64
  -8  -2  -1   23.28    1.76
  -8  -2  -1   21.79    1.46
  -8  -2  -2    1.70    0.70
  -8  -2  -2    1.21    0.41
  -8  -2  -2   -0.22    0.60
  -8  -2  -3   19.87    1.58
  -8  -2  -3   17.82    1.50
  -8  -2  -4    3.42    0.73
  -8  -2  -4    2.32    0.63
  -8  -2  -5    7.63    1.02
  -8  -2  -5    6.57    0.96
  -8  -2  -6    0.51    0.46
  -8  -2  -6    0.12    0.52
  -8  -2  -7   42.01    2.27
  -8  -2  -7   45.22    2.44
  -8  -2  -8   16.91    1.39
  -8  -2  -8   21.10    1.63
  -8  -2  -9   82.28    3.37
  -8  -2 -10    0.35    0.38
   8   2  10    0.41    0.44
   8   2  11    9.24    0.90
  -8  -2 -11   10.04    0.95
   8   2  12   89.88    2.95
  -8  -2 -12   92.97    3.10
  -8  -2 -13   16.96    0.98
  -8  -3  13   23.20    1.18
  -8  -3  12    5.56    0.66
  -8  -3  11   47.38    2.30
  -8  -3  10    2.84    0.69
  -8  -3   9    3.90    0.77
  -8  -3   8   18.02    1.63
  -8  -3   7   10.62    1.33
  -8  -3   6   27.30    2.11
  -8  -3   5   15.02    1.57
  -8  -3   5   14.26    1.12
  -8  -3   4  222.58    7.25
  -8  -3   4  211.38    6.12
  -8  -3   4  214.71    6.53
  -8  -3   3    7.87    1.10
  -8  -3   3    9.21    0.92
  -8  -3   3    7.11    0.96
  -8  -3   2   28.94    2.10
  -8  -3   2   28.40    1.92
  -8  -3   2   28.44    1.66
  -8  -3   1  184.94    6.19
  -8  -3   1  168.64    5.36
  -8  -3   1  182.96    5.95
  -8  -3   0  206.49    6.68
  -8  -3   0  193.53    6.00
  -8  -3   0  214.90    6.61
  -8  -3  -1    2.86    0.79
  -8  -3  -1    1.22    0.51
  -8  -3  -2    1.06    0.61
  -8  -3  -2    0.61    0.40
  -8  -3  -2    1.13    0.56
  -8  -3  -3   63.55    2.99
  -8  -3  -3   63.75    3.05
  -8  -3  -3   68.10    3.19
  -8  -3  -4    1.21    0.55
  -8  -3  -4    2.52    0.80
  -8  -3  -5   47.38    2.52
  -8  -3  -5   47.10    2.57
  -8  -3  -6   -0.45    0.62
  -8  -3  -6    0.46    0.52
  -8  -3  -7   38.02    2.19
  -8  -3  -7   42.39    2.40
  -8  -3  -8  201.37    6.35
   8   3   9    6.71    0.90
  -8  -3  -9    9.01    1.05
   8   3  10    8.96    0.92
  -8  -3 -10   10.57    1.09
   8   3  11   21.42    1.29
  -8  -3 -11   20.15    1.38
  -8  -3 -12  131.33    4.07
  -8  -3 -13   76.60    2.56
  -8  -4  12  111.52    3.63
  -8  -4  11   88.40    3.37
  -8  -4  10  129.53    4.64
  -8  -4   9   22.09    1.76
  -8  -4   8   10.32    1.29
  -8  -4   7    4.42    0.94
  -8  -4   6   72.19    3.59
  -8  -4   6   70.10    2.83
  -8  -4   5  115.54    4.76
  -8  -4   5  110.20    3.87
  -8  -4   4    3.94    0.86
  -8  -4   4    3.23    0.61
  -8  -4   3   95.72    4.21
  -8  -4   3   95.84    3.56
  -8  -4   3  100.72    3.85
  -8  -4   2    0.28    0.36
  -8  -4   2    0.01    0.61
  -8  -4   2    0.89    0.51
  -8  -4   1  186.14    6.19
  -8  -4   1  170.13    5.45
  -8  -4   1  175.02    5.84
  -8  -4   0   51.76    2.79
  -8  -4   0   47.39    2.38
  -8  -4   0   52.89    2.72
  -8  -4  -1   61.46    3.05
  -8  -4  -1   61.98    3.02
  -8  -4  -2  133.67    4.89
  -8  -4  -2  134.89    4.91
  -8  -4  -2  134.82    4.67
  -8  -4  -3    0.66    0.54
  -8  -4  -3    0.28    0.42
  -8  -4  -3    0.39    0.57
  -8  -4  -4    4.28    0.82
  -8  -4  -4    5.46    0.95
  -8  -4  -5  103.12    4.07
  -8  -4  -5  102.68    4.10
  -8  -4  -6    6.18    0.96
  -8  -4  -6    7.88    1.08
  -8  -4  -7  102.32    3.98
  -8  -4  -7  108.88    4.22
  -8  -4  -8   41.10    2.35
  -8  -4  -9   65.76    3.01
  -8  -4 -10    0.09    0.44
  -8  -4 -11   68.15    2.78
  -8  -4 -12    5.47    0.70
  -8  -4 -13   41.55    1.74
  -8  -5  12   54.27    2.19
  -8  -5  11  157.19    4.96
  -8  -5  10  102.48    3.92
  -8  -5   9   14.33    1.40
  -8  -5   8    3.57    0.84
  -8  -5   7   62.93    3.27
  -8  -5   6    0.42    0.51
  -8  -5   6    0.98    0.48
  -8  -5   5    9.92    1.30
  -8  -5   5   11.24    1.08
  -8  -5   4   99.97    4.34
  -8  -5   4   97.24    3.64
  -8  -5   3    2.08    0.68
  -8  -5   3    2.46    0.59
  -8  -5   2   95.17    4.09
  -8  -5   2   94.54    3.73
  -8  -5   2   92.43    3.57
  -8  -5   1    1.37    0.62
  -8  -5   1    0.92    0.46
  -8  -5   1    1.21    0.56
  -8  -5   0   73.24    3.35
  -8  -5   0   63.67    2.93
  -8  -5   0   69.98    3.21
  -8  -5  -1  194.43    6.24
  -8  -5  -1  207.96    6.60
  -8  -5  -1  216.94    6.69
  -8  -5  -2   30.05    2.00
  -8  -5  -2   30.82    2.09
  -8  -5  -3  116.47    4.35
  -8  -5  -3  119.65    4.51
  -8  -5  -3  109.95    4.20
  -8  -5  -4  295.57    8.45
  -8  -5  -4  276.87    8.25
  -8  -5  -5    6.92    0.99
  -8  -5  -5    6.75    1.07
  -8  -5  -6   33.12    2.10
  -8  -5  -6   31.30    2.08
  -8  -5  -7    1.57    0.67
  -8  -5  -8  289.35    8.42
  -8  -5  -9    2.42    0.66
  -8  -5 -10    4.92    0.79
  -8  -5 -11    6.89    0.83
  -8  -5 -12   27.40    1.52
  -8  -5 -13    1.03    0.35
  -8  -6  12   61.87    2.28
  -8  -6  11   76.80    2.94
  -8  -6  10    4.94    0.76
  -8  -6   9   29.74    1.97
  -8  -6   8   34.09    2.23
  -8  -6   7    0.29    0.49
  -8  -6   6   19.08    1.74
  -8  -6   6   20.23    1.45
  -8  -6   5    2.77    0.73
  -8  -6   5    2.92    0.63
  -8  -6   4   22.16    1.86
  -8  -6   4   19.63    1.46
  -8  -6   3  140.47    5.27
  -8  -6   3  139.06    4.70
  -8  -6   2   13.93    1.42
  -8  -6   2   14.54    1.27
  -8  -6   1    0.04    0.48
  -8  -6   1    1.16    0.53
  -8  -6   0   53.69    2.78
  -8  -6   0   49.42    2.52
  -8  -6   0   51.26    2.67
  -8  -6  -1    0.67    0.43
  -8  -6  -1    1.35    0.63
  -8  -6  -1    1.20    0.66
  -8  -6  -2  381.42   10.41
  -8  -6  -2  389.20   10.65
  -8  -6  -3    8.15    1.04
  -8  -6  -3    8.43    1.20
  -8  -6  -3    8.03    0.98
  -8  -6  -4  173.78    5.82
  -8  -6  -4  164.90    5.58
  -8  -6  -5   88.68    3.72
  -8  -6  -5   82.66    3.61
  -8  -6  -6   13.84    1.36
  -8  -6  -7  174.09    5.84
  -8  -6  -8   55.01    2.78
  -8  -6  -9   14.76    1.35
  -8  -6 -10   41.99    2.23
  -8  -6 -11    3.37    0.63
  -8  -6 -12   13.45    1.04
  -8  -6 -13    4.45    0.54
  -8  -7  11    4.96    0.62
  -8  -7  10    1.36    0.46
  -8  -7   9    0.21    0.44
  -8  -7   8    0.82    0.45
  -8  -7   7   53.69    2.86
  -8  -7   6   75.53    3.57
  -8  -7   6   78.26    3.13
  -8  -7   5   41.40    2.55
  -8  -7   5   44.62    2.27
  -8  -7   5   44.54    2.25
  -8  -7   4  209.46    6.86
  -8  -7   4  207.73    6.25
  -8  -7   4  203.63    6.15
  -8  -7   3   28.77    2.06
  -8  -7   3   28.07    1.80
  -8  -7   2   45.59    2.60
  -8  -7   2   48.31    2.45
  -8  -7   1    4.35    0.82
  -8  -7   1    3.97    0.73
  -8  -7   1    4.88    0.80
  -8  -7   0   71.26    3.18
  -8  -7   0   63.45    2.96
  -8  -7   0   67.17    3.08
  -8  -7  -1    1.11    0.41
  -8  -7  -1    2.39    0.66
  -8  -7  -1    3.17    0.78
  -8  -7  -2   42.83    2.26
  -8  -7  -2   36.61    2.20
  -8  -7  -2   43.46    2.45
  -8  -7  -3  120.55    4.64
  -8  -7  -3  126.10    4.34
  -8  -7  -4   10.92    1.15
  -8  -7  -5   90.49    3.71
  -8  -7  -6   24.41    1.80
  -8  -7  -7  150.59    5.24
  -8  -7  -8    0.12    0.45
  -8  -7  -9  107.55    4.05
  -8  -7 -10   17.81    1.39
  -8  -7 -11   54.35    2.40
  -8  -7 -12   82.89    2.94
  -8  -7 -13    3.74    0.49
   8   7  13    3.76    0.47
  -8  -8  10   64.45    2.53
  -8  -8   9    5.31    0.74
  -8  -8   8   69.87    3.05
  -8  -8   7   30.91    2.00
  -8  -8   6    2.65    0.61
  -8  -8   6    3.89    0.65
  -8  -8   5  217.61    7.04
  -8  -8   5  238.87    6.69
  -8  -8   5  221.67    6.55
  -8  -8   4   12.20    1.29
  -8  -8   4   14.16    1.27
  -8  -8   4   14.50    1.20
  -8  -8   3  227.33    6.97
  -8  -8   3  211.85    6.49
  -8  -8   2    6.10    0.95
  -8  -8   2    8.28    0.99
  -8  -8   2    7.00    0.80
  -8  -8   1    2.57    0.61
  -8  -8   1    2.49    0.58
  -8  -8   1    1.77    0.42
  -8  -8   0   18.90    1.49
  -8  -8   0   18.76    1.32
  -8  -8   0   18.36    1.49
  -8  -8  -1   30.07    1.84
  -8  -8  -1   29.59    1.70
  -8  -8  -1   28.39    1.88
  -8  -8  -2   12.31    1.08
  -8  -8  -2   10.52    1.18
  -8  -8  -3   47.95    2.31
  -8  -8  -4   49.89    2.38
  -8  -8  -5    1.66    0.57
  -8  -8  -5    1.41    0.47
  -8  -8  -6   14.53    1.23
  -8  -8  -6   15.79    1.39
  -8  -8  -7    4.09    0.76
  -8  -8  -7    3.32    0.63
  -8  -8  -8   49.37    2.34
  -8  -8  -8   56.27    2.70
  -8  -8  -9   82.96    3.19
  -8  -8  -9   97.84    3.65
  -8  -8 -10   76.58    2.91
  -8  -8 -10   96.39    3.43
  -8  -8 -11   14.14    1.13
  -8  -8 -12   48.26    1.99
   8   8  12   44.25    1.87
  -8  -9   9   14.84    1.07
  -8  -9   8    1.71    0.48
  -8  -9   7  132.28    4.55
  -8  -9   7  140.08    4.29
  -8  -9   6  166.54    5.43
  -8  -9   6  168.83    5.08
  -8  -9   5   36.12    1.96
  -8  -9   5   33.83    2.05
  -8  -9   5   35.36    1.77
  -8  -9   5   34.39    1.84
  -8  -9   4  265.50    7.79
  -8  -9   4  278.39    7.60
  -8  -9   4  266.92    7.26
  -8  -9   4  264.02    7.35
  -8  -9   3    9.71    1.08
  -8  -9   3    8.95    1.06
  -8  -9   3   10.07    0.95
  -8  -9   2   12.96    1.21
  -8  -9   2   13.49    1.23
  -8  -9   2   12.43    1.07
  -8  -9   1  101.50    3.81
  -8  -9   1  101.13    3.59
  -8  -9   0   45.01    2.17
  -8  -9   0   45.64    2.36
  -8  -9  -1  304.81    8.31
  -8  -9  -1  314.97    8.68
  -8  -9  -2   -0.01    0.53
  -8  -9  -2    1.22    0.48
  -8  -9  -3  133.82    4.42
  -8  -9  -3  124.34    4.56
  -8  -9  -4   35.78    1.97
  -8  -9  -4   30.39    1.95
  -8  -9  -5   17.45    1.36
  -8  -9  -5   21.15    1.53
  -8  -9  -6   48.21    2.35
  -8  -9  -6   49.32    2.47
  -8  -9  -7    6.73    0.90
  -8  -9  -7    5.82    0.76
  -8  -9  -8   84.11    3.17
  -8  -9  -8   95.63    3.53
  -8  -9  -9   14.77    1.14
   8   9   9   14.62    1.13
  -8  -9 -10   77.74    2.84
   8   9  10   74.19    2.84
  -8  -9 -11   24.34    1.27
   8   9  11   25.89    1.37
  -8  -9 -12    5.00    0.57
  -8 -10   8   31.95    1.52
  -8 -10   7   17.10    1.16
  -8 -10   6   52.05    2.30
  -8 -10   6   53.27    2.19
  -8 -10   5  133.25    4.13
  -8 -10   5  132.70    4.29
  -8 -10   5  134.82    4.20
  -8 -10   4   57.18    2.50
  -8 -10   4   59.31    2.41
  -8 -10   4   55.83    2.36
  -8 -10   3   11.88    1.10
  -8 -10   3   12.08    1.03
  -8 -10   2  107.43    3.87
  -8 -10   2  111.70    3.77
  -8 -10   1   35.91    2.00
  -8 -10   1   34.31    1.85
  -8 -10   0   85.96    3.24
  -8 -10   0   88.64    3.43
  -8 -10  -1   42.33    2.09
  -8 -10  -1   40.03    2.17
  -8 -10  -2   49.36    2.33
  -8 -10  -2   47.30    2.40
  -8 -10  -3  110.93    3.86
  -8 -10  -3  101.53    3.92
  -8 -10  -4   81.10    3.19
  -8 -10  -4   77.82    3.28
  -8 -10  -5  152.38    4.89
  -8 -10  -5  149.49    5.02
  -8 -10  -6    8.52    0.95
  -8 -10  -6    7.78    0.89
  -8 -10  -6   10.96    1.06
  -8 -10  -7    1.25    0.48
  -8 -10  -7   -0.20    0.43
  -8 -10  -8   27.42    1.59
  -8 -10  -8   27.11    1.67
  -8 -10  -9  104.74    3.41
  -8 -10  -9  117.42    3.70
  -8 -10 -10    0.92    0.35
  -8 -10 -10    0.85    0.31
   8  10  10    0.57    0.25
  -8 -10 -11    0.81    0.32
  -8 -10 -11    0.20    0.20
  -8 -11   6   84.87    2.79
  -8 -11   5    1.87    0.37
  -8 -11   4    2.93    0.57
  -8 -11   4    2.52    0.49
  -8 -11   3   50.43    2.26
  -8 -11   3   52.95    2.23
  -8 -11   2   76.51    3.00
  -8 -11   2   84.14    3.02
  -8 -11   1   45.77    2.17
  -8 -11   1   45.93    2.12
  -8 -11   0    0.37    0.37
  -8 -11   0    0.66    0.42
  -8 -11  -1   29.60    1.67
  -8 -11  -1   27.30    1.66
  -8 -11  -2   41.39    2.06
  -8 -11  -2   39.59    2.08
  -8 -11  -3  359.33    9.55
  -8 -11  -3  367.34    9.52
  -8 -11  -4   40.96    2.05
  -8 -11  -4   39.26    2.05
  -8 -11  -5   75.09    2.94
  -8 -11  -5   71.82    2.93
  -8 -11  -6    0.31    0.43
  -8 -11  -6    1.14    0.42
  -8 -11  -7    0.60    0.31
  -8 -11  -7    0.13    0.32
  -8 -11  -7    0.26    0.34
  -8 -11  -8   24.72    1.42
  -8 -11  -8   22.66    1.36
  -8 -11  -8   24.09    1.42
  -8 -11  -9   10.77    0.86
  -8 -11  -9    9.83    0.82
  -8 -12   4   -0.13    0.28
  -8 -12   3   74.22    2.64
  -8 -12   3   71.17    2.62
  -8 -12   2   13.61    1.02
  -8 -12   2   14.33    1.05
  -8 -12   1   32.08    1.66
  -8 -12   1   33.38    1.69
  -8 -12   0   10.27    0.93
  -8 -12   0   11.44    0.95
  -8 -12  -1   27.19    1.55
  -8 -12  -1   30.72    1.64
  -8 -12  -2  246.55    6.69
  -8 -12  -2  239.31    6.61
  -8 -12  -3    8.11    0.86
  -8 -12  -3    9.49    0.89
  -8 -12  -4   27.91    1.56
  -8 -12  -4   26.44    1.49
  -8 -12  -5    4.71    0.62
  -8 -12  -5    5.17    0.70
  -8 -12  -6    7.60    0.78
  -8 -12  -6    7.73    0.75
  -8 -12  -7   20.80    1.20
  -8 -12  -7   23.41    1.33
  -8 -12  -8    0.16    0.20
  -8 -12  -8    0.61    0.28
  -8 -13   3    0.57    0.26
  -8 -13   2  108.53    3.36
  -8 -13   1    3.84    0.52
  -8 -13   1    2.87    0.48
  -8 -13   0    0.35    0.28
  -8 -13   0    0.18    0.28
  -8 -13  -1   83.89    2.86
  -8 -13  -1   94.31    3.06
  -8 -13  -2    2.08    0.44
  -8 -13  -2    1.29    0.39
  -8 -13  -3   19.54    1.19
  -8 -13  -3   17.71    1.09
  -8 -13  -4    0.43    0.31
  -8 -13  -4   -0.27    0.30
  -8 -13  -5   21.95    1.24
  -8 -13  -5   18.85    1.04
  -8 -13  -6   32.23    1.52
  -8 -13  -7    8.37    0.69
  -8 -14   0   17.72    1.00
  -8 -14  -1   -0.22    0.26
  -8 -14  -2   18.90    1.06
  -8 -14  -3   13.83    0.89
  -8 -14  -4   13.52    0.86
  -9   6   5   44.16    1.72
  -9   6   4   31.88    1.46
  -9   6   3   45.97    1.85
  -9   6   2    0.06    0.28
  -9   6   1    0.31    0.24
  -9   6   0    0.40    0.25
  -9   6   0    0.34    0.25
  -9   6  -1   24.81    1.26
  -9   6  -2   11.95    0.83
  -9   6  -3   15.43    0.92
  -9   5   6    5.87    0.60
  -9   5   5    2.61    0.46
  -9   5   4    5.19    0.65
  -9   5   3   54.80    2.27
  -9   5   2    0.01    0.34
  -9   5   1    6.62    0.68
  -9   5   1    5.84    0.68
  -9   5   0   35.95    1.72
  -9   5   0   39.77    1.79
  -9   5  -1   15.16    1.07
  -9   5  -1   14.75    1.00
  -9   5  -2    4.95    0.63
  -9   5  -2    4.53    0.55
  -9   5  -3   93.96    3.13
  -9   5  -4   83.58    2.80
  -9   5  -5   16.77    0.99
  -9   4   7    3.42    0.47
  -9   4   6    4.26    0.59
  -9   4   5   60.40    2.45
  -9   4   4    1.88    0.49
  -9   4   3   11.65    1.04
  -9   4   2   26.77    1.62
  -9   4   1   79.68    2.93
  -9   4   1   86.97    3.19
  -9   4   0    0.59    0.36
  -9   4   0    0.62    0.36
  -9   4  -1    6.64    0.79
  -9   4  -1    6.31    0.73
  -9   4  -2   38.99    1.94
  -9   4  -2   39.71    1.84
  -9   4  -3    0.28    0.31
  -9   4  -3    0.68    0.34
  -9   4  -4  125.94    3.87
  -9   4  -4  112.54    3.43
  -9   4  -5   63.09    2.41
  -9   4  -6    5.68    0.61
  -9   4  -7    9.36    0.71
  -9   3   8    6.73    0.68
  -9   3   8    6.22    0.57
  -9   3   7    1.23    0.39
  -9   3   7    2.19    0.43
  -9   3   6  170.83    5.04
  -9   3   5   38.84    1.98
  -9   3   4   -0.33    0.38
  -9   3   3    7.67    0.93
  -9   3   2   88.74    3.45
  -9   3   1    1.44    0.43
  -9   3   1    1.41    0.53
  -9   3   0   51.16    2.34
  -9   3   0   54.60    2.49
  -9   3  -1    0.86    0.40
  -9   3  -1    1.51    0.46
  -9   3  -2    1.28    0.41
  -9   3  -2    0.61    0.34
  -9   3  -3   53.50    2.38
  -9   3  -3   48.40    2.18
  -9   3  -4   14.23    1.14
  -9   3  -4   14.15    1.03
  -9   3  -5   63.25    2.51
  -9   3  -5   56.22    2.15
  -9   3  -6    6.32    0.72
  -9   3  -7    0.08    0.27
  -9   3  -8   31.25    1.40
  -9   2   9    5.61    0.63
  -9   2   8   57.92    2.34
  -9   2   8   57.70    2.07
  -9   2   7  129.02    4.13
  -9   2   7  130.18    3.98
  -9   2   6   80.29    2.99
  -9   2   6   80.36    3.01
  -9   2   5  179.71    5.48
  -9   2   4    0.87    0.48
  -9   2   3   39.81    2.17
  -9   2   2   34.36    2.03
  -9   2   1   47.12    2.43
  -9   2   0   20.67    1.42
  -9   2   0   21.48    1.56
  -9   2  -1    1.75    0.50
  -9   2  -1    2.20    0.60
  -9   2  -2   34.97    1.95
  -9   2  -2   33.99    1.91
  -9   2  -3   11.10    1.07
  -9   2  -3   12.22    1.09
  -9   2  -4   56.65    2.53
  -9   2  -4   53.29    2.34
  -9   2  -5   17.85    1.31
  -9   2  -5   15.35    1.12
  -9   2  -6    8.24    0.88
  -9   2  -6    7.21    0.71
  -9   2  -7   51.47    2.18
  -9   2  -8    4.20    0.58
   9  -2   9   42.40    1.86
  -9   2  -9   47.01    1.78
  -9   1  10    2.58    0.44
  -9   1   9   28.06    1.50
  -9   1   8    5.98    0.75
  -9   1   7  167.67    5.09
  -9   1   7  177.49    5.28
  -9   1   7  178.54    5.02
  -9   1   6  210.82    6.38
  -9   1   6  224.65    6.37
  -9   1   5   24.92    1.63
  -9   1   5   24.25    1.59
  -9   1   4    1.07    0.54
  -9   1   4    0.91    0.45
  -9   1   3   54.92    2.66
  -9   1   3   58.28    2.74
  -9   1   2    9.53    1.10
  -9   1   1   21.58    1.63
  -9   1   0   12.07    1.10
  -9   1   0   13.28    1.25
  -9   1  -1   27.96    1.74
  -9   1  -1   30.69    1.91
  -9   1  -2   22.11    1.56
  -9   1  -2   23.12    1.63
  -9   1  -3    0.96    0.45
  -9   1  -3    0.45    0.43
  -9   1  -4   17.96    1.39
  -9   1  -4   17.47    1.32
  -9   1  -5    6.94    0.88
  -9   1  -5    7.91    0.88
  -9   1  -6   43.70    2.12
  -9   1  -6   37.92    1.85
  -9   1  -7   38.74    1.92
  -9   1  -7   36.35    1.66
  -9   1  -8   69.49    2.63
   9  -1   9    4.64    0.66
  -9   1  -9    4.51    0.59
  -9   1 -10   32.93    1.41
  -9   0  10    2.36    0.43
  -9   0   9    2.10    0.45
  -9   0   9    1.24    0.42
  -9   0   8   76.47    2.91
  -9   0   8   80.83    3.04
  -9   0   7    1.10    0.48
  -9   0   7    0.09    0.42
  -9   0   7    0.65    0.33
  -9   0   6   29.44    1.84
  -9   0   6   30.70    1.77
  -9   0   6   31.41    1.70
  -9   0   5    0.09    0.44
  -9   0   5   -0.39    0.46
  -9   0   4   13.76    1.31
  -9   0   4   11.25    1.16
  -9   0   3  128.51    4.66
  -9   0   3  127.49    4.56
  -9   0   2   14.41    1.39
  -9   0   2   13.17    1.29
  -9   0   1   11.43    1.30
  -9   0   1    9.31    1.12
  -9   0   0  145.33    5.07
  -9   0  -1   14.62    1.25
  -9   0  -1   13.65    1.32
  -9   0  -2  234.77    6.99
  -9   0  -2  245.84    7.19
  -9   0  -3    8.53    1.02
  -9   0  -3    8.16    1.02
  -9   0  -4   52.47    2.55
  -9   0  -4   51.68    2.49
  -9   0  -5   31.92    1.88
  -9   0  -5   28.66    1.74
  -9   0  -6   32.03    1.84
  -9   0  -6   25.50    1.56
  -9   0  -7    9.96    0.90
  -9   0  -7   11.92    1.09
  -9   0  -8    2.27    0.55
   9   0   9   20.82    1.35
  -9   0  -9   24.93    1.38
   9   0  10    4.82    0.57
  -9   0 -10    4.80    0.56
  -9  -1  10    0.29    0.26
  -9  -1  10    0.15    0.30
  -9  -1   9    5.78    0.70
  -9  -1   9    5.52    0.71
  -9  -1   8   45.90    2.23
  -9  -1   8   47.17    2.22
  -9  -1   7  109.08    4.06
  -9  -1   7  115.26    3.97
  -9  -1   6    0.94    0.52
  -9  -1   6    0.35    0.35
  -9  -1   6    1.08    0.38
  -9  -1   5    9.48    1.12
  -9  -1   5    8.38    0.92
  -9  -1   4   78.91    3.48
  -9  -1   4   80.45    3.29
  -9  -1   3    5.44    0.93
  -9  -1   3    4.97    0.78
  -9  -1   2   15.28    1.44
  -9  -1   2   13.01    1.29
  -9  -1   1    7.57    1.09
  -9  -1   1    7.70    0.97
  -9  -1   0    9.12    1.24
  -9  -1   0    8.10    1.08
  -9  -1  -1  239.17    6.96
  -9  -1  -1  250.51    7.41
  -9  -1  -2    0.99    0.45
  -9  -1  -2    0.55    0.52
  -9  -1  -3  180.33    5.75
  -9  -1  -3  182.58    5.85
  -9  -1  -4   58.54    2.73
  -9  -1  -4   54.20    2.64
  -9  -1  -5    0.84    0.46
  -9  -1  -5    0.86    0.61
  -9  -1  -6   20.23    1.44
  -9  -1  -6   23.40    1.60
  -9  -1  -7   22.80    1.45
  -9  -1  -7   25.03    1.61
  -9  -1  -8   11.32    1.03
   9   1   9   26.06    1.52
  -9  -1  -9   32.57    1.67
  -9  -1 -10    2.07    0.45
   9   1  10    2.05    0.42
  -9  -1 -11    1.64    0.33
  -9  -2  10  123.43    3.89
  -9  -2  10  135.49    4.01
  -9  -2   9   68.64    2.80
  -9  -2   9   77.40    2.88
  -9  -2   8   39.28    2.13
  -9  -2   8   43.64    2.12
  -9  -2   7   13.42    1.26
  -9  -2   7   13.74    1.17
  -9  -2   6   16.09    1.44
  -9  -2   6   17.06    1.32
  -9  -2   5    0.59    0.55
  -9  -2   5    0.27    0.35
  -9  -2   4    1.59    0.62
  -9  -2   4    0.49    0.44
  -9  -2   3   42.08    2.48
  -9  -2   3   40.45    2.26
  -9  -2   2    4.97    0.99
  -9  -2   2    2.08    0.57
  -9  -2   1   37.91    2.33
  -9  -2   1   35.57    2.20
  -9  -2   0  228.40    7.05
  -9  -2   0  220.33    6.94
  -9  -2  -1    6.66    1.08
  -9  -2  -1    4.44    0.86
  -9  -2  -2   23.87    1.62
  -9  -2  -2   24.18    1.79
  -9  -2  -3   20.89    1.55
  -9  -2  -3   21.19    1.64
  -9  -2  -4    9.72    1.17
  -9  -2  -4    9.06    1.04
  -9  -2  -5   11.75    1.19
  -9  -2  -5   11.92    1.19
  -9  -2  -6   48.57    2.42
  -9  -2  -6   56.91    2.65
  -9  -2  -7    4.40    0.74
  -9  -2  -7    4.89    0.76
  -9  -2  -8   21.22    1.45
  -9  -2  -9    6.16    0.78
   9   2   9    4.73    0.65
  -9  -2 -10   36.81    1.75
  -9  -2 -11   16.24    0.99
  -9  -3  10    0.35    0.32
  -9  -3  10    1.50    0.45
  -9  -3   9  163.20    5.07
  -9  -3   8    1.88    0.53
  -9  -3   7   10.20    1.12
  -9  -3   6    4.15    0.80
  -9  -3   5   44.33    2.55
  -9  -3   4   18.69    1.66
  -9  -3   4   19.16    1.41
  -9  -3   3   16.91    1.58
  -9  -3   3   17.83    1.43
  -9  -3   2   52.02    2.82
  -9  -3   2   50.70    2.59
  -9  -3   1   43.59    2.55
  -9  -3   1   38.73    2.29
  -9  -3   0  159.83    5.50
  -9  -3   0  154.60    5.40
  -9  -3  -1   68.00    3.17
  -9  -3  -1   61.68    2.63
  -9  -3  -1   64.23    3.07
  -9  -3  -2   45.75    2.21
  -9  -3  -2   50.88    2.67
  -9  -3  -3    0.85    0.39
  -9  -3  -3   -0.05    0.40
  -9  -3  -3    0.23    0.55
  -9  -3  -4   15.35    1.41
  -9  -3  -4   15.22    1.31
  -9  -3  -5    0.75    0.49
  -9  -3  -5    0.04    0.51
  -9  -3  -6    0.75    0.45
  -9  -3  -6    0.38    0.56
  -9  -3  -7    0.08    0.42
  -9  -3  -8   44.06    2.22
  -9  -3  -9  104.92    3.66
  -9  -3 -10   18.77    1.23
  -9  -3 -11    2.15    0.42
  -9  -4  10  219.89    6.06
  -9  -4   9    7.36    0.88
  -9  -4   8   21.62    1.56
  -9  -4   7   -0.04    0.43
  -9  -4   6   12.96    1.34
  -9  -4   5   21.12    1.74
  -9  -4   4    4.77    0.89
  -9  -4   4    5.46    0.68
  -9  -4   3   87.25    3.80
  -9  -4   3   78.74    2.98
  -9  -4   3   85.00    3.34
  -9  -4   2  105.04    4.23
  -9  -4   2   99.75    3.52
  -9  -4   2  105.06    3.96
  -9  -4   1  132.78    4.92
  -9  -4   1  131.53    4.73
  -9  -4   1  131.79    4.30
  -9  -4   0   28.79    2.02
  -9  -4   0   24.33    1.55
  -9  -4   0   28.76    1.93
  -9  -4  -1   28.88    1.96
  -9  -4  -1   26.13    1.63
  -9  -4  -1   29.79    2.00
  -9  -4  -2    6.01    0.98
  -9  -4  -2    4.02    0.64
  -9  -4  -3   34.50    2.17
  -9  -4  -3   33.36    1.93
  -9  -4  -3   28.90    1.77
  -9  -4  -4   28.19    1.90
  -9  -4  -4   24.51    1.69
  -9  -4  -5   69.93    3.12
  -9  -4  -5   68.81    3.05
  -9  -4  -6    0.85    0.53
  -9  -4  -6    1.55    0.65
  -9  -4  -7   56.17    2.65
  -9  -4  -8   90.58    3.47
  -9  -4  -9   60.69    2.57
  -9  -4 -10   25.29    1.45
  -9  -4 -11    5.68    0.62
  -9  -5  10    0.52    0.36
  -9  -5   9  130.96    4.29
  -9  -5   8   44.50    2.28
  -9  -5   7   30.85    1.96
  -9  -5   6   20.11    1.65
  -9  -5   5    0.77    0.38
  -9  -5   5    0.20    0.46
  -9  -5   4    6.22    0.77
  -9  -5   4    5.82    0.95
  -9  -5   3  111.74    4.38
  -9  -5   3  105.09    3.67
  -9  -5   2   44.72    2.55
  -9  -5   2   41.78    2.07
  -9  -5   2   43.36    2.29
  -9  -5   1   74.21    3.37
  -9  -5   1   69.85    3.14
  -9  -5   1   71.53    2.90
  -9  -5   0    2.70    0.70
  -9  -5   0    1.15    0.41
  -9  -5   0    2.57    0.73
  -9  -5  -1   41.60    2.39
  -9  -5  -1   41.41    2.15
  -9  -5  -1   44.97    2.46
  -9  -5  -2   31.38    1.89
  -9  -5  -2   35.10    2.19
  -9  -5  -3   81.52    3.40
  -9  -5  -3   61.17    2.82
  -9  -5  -4   24.50    1.81
  -9  -5  -4   22.50    1.58
  -9  -5  -5   52.32    2.62
  -9  -5  -5   47.83    2.45
  -9  -5  -6  134.54    4.66
  -9  -5  -7   16.40    1.36
  -9  -5  -8  177.92    5.51
  -9  -5  -9   39.72    2.01
  -9  -5 -10  106.17    3.54
  -9  -5 -11   17.10    1.07
  -9  -6  10  103.90    3.29
  -9  -6   9   66.57    2.65
  -9  -6   8   -0.24    0.40
  -9  -6   7   68.36    3.00
  -9  -6   6    0.33    0.44
  -9  -6   5    4.92    0.85
  -9  -6   5    6.04    0.75
  -9  -6   4   11.16    1.23
  -9  -6   4   10.82    1.00
  -9  -6   3    8.54    1.14
  -9  -6   3    8.39    0.90
  -9  -6   2  294.54    8.40
  -9  -6   2  273.09    7.66
  -9  -6   1  116.43    4.38
  -9  -6   1  113.51    4.13
  -9  -6   1  111.28    3.96
  -9  -6   0    1.25    0.60
  -9  -6   0    1.01    0.41
  -9  -6   0    1.33    0.60
  -9  -6  -1    2.24    0.64
  -9  -6  -1    0.94    0.39
  -9  -6  -1    3.33    0.78
  -9  -6  -2  105.77    4.01
  -9  -6  -2  115.32    4.34
  -9  -6  -2  117.66    4.21
  -9  -6  -3   28.03    1.91
  -9  -6  -3   20.37    1.52
  -9  -6  -4   82.55    3.27
  -9  -6  -5   66.03    2.89
  -9  -6  -6    0.62    0.42
  -9  -6  -7  135.70    4.59
  -9  -6  -8    1.33    0.46
  -9  -6  -9   70.23    2.80
  -9  -6 -10   51.33    2.18
  -9  -6 -11    6.45    0.65
  -9  -7   9   13.11    0.97
  -9  -7   8    2.96    0.58
  -9  -7   7   75.30    3.07
  -9  -7   6   18.17    1.44
  -9  -7   5    9.28    1.07
  -9  -7   5    8.80    0.89
  -9  -7   4   38.71    2.23
  -9  -7   4   36.10    1.87
  -9  -7   3  144.85    5.03
  -9  -7   3  140.56    4.53
  -9  -7   2  165.18    5.48
  -9  -7   2  158.83    5.03
  -9  -7   1   25.58    1.76
  -9  -7   1   24.47    1.58
  -9  -7   0   71.84    3.08
  -9  -7   0   64.71    2.83
  -9  -7  -1    1.00    0.54
  -9  -7  -1   -0.20    0.48
  -9  -7  -2   20.97    1.51
  -9  -7  -3   50.16    2.47
  -9  -7  -4   16.31    1.34
  -9  -7  -5   11.22    1.06
  -9  -7  -6   49.00    2.35
  -9  -7  -7    5.08    0.73
[truncated: 10,636 more chars]
