# Supplementary material for: Influence of Ligand Backbone Structure and Connectivity on the Properties of Phosphine-Sulfonate Pd(II)/Ni(II) Catalysts
Source: Polymers (Basel). 2017 May 9;9(5):168. doi: 10.3390/polym9050168 (PMC6431890; doi:10.3390/polym9050168)
Supplement: Supplementary file 1 [file polymers-09-00168-s001.zip › Pd.cif]

 
data_shelxl
 
_audit_creation_method            SHELXL-2013
_chemical_name_systematic
;
 ?
;
_chemical_name_common             ?
_chemical_melting_point           ?
_chemical_formula_moiety          ?
_chemical_formula_sum
 'C25 H37 O4 P Pd S2' 
_chemical_formula_weight          603.03

loop_
 _atom_type_symbol
 _atom_type_description
 _atom_type_scat_dispersion_real
 _atom_type_scat_dispersion_imag
 _atom_type_scat_source
 'C'  'C'   0.0181   0.0091
 'International Tables Vol C Tables 4.2.6.8 and 6.1.1.4'
 'H'  'H'   0.0000   0.0000
 'International Tables Vol C Tables 4.2.6.8 and 6.1.1.4'
 'P'  'P'   0.2955   0.4335
 'International Tables Vol C Tables 4.2.6.8 and 6.1.1.4'
 'S'  'S'   0.3331   0.5567
 'International Tables Vol C Tables 4.2.6.8 and 6.1.1.4'
 'Pd'  'Pd'   0.1215   3.9337
 'International Tables Vol C Tables 4.2.6.8 and 6.1.1.4'
 'O'  'O'   0.0492   0.0322
 'International Tables Vol C Tables 4.2.6.8 and 6.1.1.4'
 
_space_group_crystal_system       monoclinic
_space_group_IT_number            15
_space_group_name_H-M_alt         'C 2/c'
_space_group_name_Hall            '-C 2yc'
 
_shelx_space_group_comment
;
The symmetry employed for this shelxl refinement is uniquely defined
by the following loop, which should always be used as a source of
symmetry information in preference to the above space-group names.
They are only intended as comments.
;
 
loop_
 _space_group_symop_operation_xyz
 'x, y, z'
 '-x, y, -z+1/2'
 'x+1/2, y+1/2, z'
 '-x+1/2, y+1/2, -z+1/2'
 '-x, -y, -z'
 'x, -y, z-1/2'
 '-x+1/2, -y+1/2, -z'
 'x+1/2, -y+1/2, z-1/2'
 
_cell_length_a                    32.7912(14)
_cell_length_b                    11.1661(4)
_cell_length_c                    15.8654(5)
_cell_angle_alpha                 90
_cell_angle_beta                  101.751(4)
_cell_angle_gamma                 90
_cell_volume                      5687.4(4)
_cell_formula_units_Z             8
_cell_measurement_temperature     290(2)
_cell_measurement_reflns_used     5376
_cell_measurement_theta_min       4.1950
_cell_measurement_theta_max       70.1440
 
_exptl_crystal_description        block 
_exptl_crystal_colour             ? 
_exptl_crystal_density_meas       ? 
_exptl_crystal_density_method     ?              
_exptl_crystal_density_diffrn     1.409          
_exptl_crystal_F_000              2496
_exptl_transmission_factor_min    ?                                             
_exptl_transmission_factor_max    ?                                             
_exptl_crystal_size_max           0.360
_exptl_crystal_size_mid           0.320
_exptl_crystal_size_min           0.250
_exptl_absorpt_coefficient_mu     7.386
_shelx_estimated_absorpt_T_min    0.176
_shelx_estimated_absorpt_T_max    0.260
_exptl_absorpt_correction_T_min                   0.07266
_exptl_absorpt_correction_T_max                   1.00000
_exptl_absorpt_correction_type            'multi-scan'
_exptl_absorpt_process_details
;
CrysAlisPro, Agilent Technologies,
Version 1.171.37.35 (release 13-08-2014 CrysAlis171 .NET)
(compiled Aug 13 2014,18:06:01)
Empirical absorption correction using spherical harmonics,
 implemented in SCALE3 ABSPACK scaling algorithm.
;
 
_exptl_special_details
;
 ?
;
 
_diffrn_ambient_temperature       290(2)
_diffrn_radiation_wavelength      1.54184
_diffrn_radiation_type            CuK\a
_diffrn_source                    'Enhance Ultra (Cu) X-ray Source'
_diffrn_measurement_device_type    'Gemini S Ultra, Agilent Technologies' 
_diffrn_measurement_method        '\w scans' 
_diffrn_detector_area_resol_mean  15.9149 
_diffrn_reflns_number             20998
_diffrn_reflns_av_unetI/netI      0.0809
_diffrn_reflns_av_R_equivalents   0.1260
_diffrn_reflns_limit_h_min        -39
_diffrn_reflns_limit_h_max        39
_diffrn_reflns_limit_k_min        -13
_diffrn_reflns_limit_k_max        13
_diffrn_reflns_limit_l_min        -19
_diffrn_reflns_limit_l_max        13
_diffrn_reflns_theta_min          4.192
_diffrn_reflns_theta_max          70.637
_diffrn_reflns_theta_full         67.684
_diffrn_measured_fraction_theta_max   0.984
_diffrn_measured_fraction_theta_full  0.999
_diffrn_reflns_Laue_measured_fraction_max    0.984
_diffrn_reflns_Laue_measured_fraction_full   0.999
_diffrn_reflns_point_group_measured_fraction_max   0.984
_diffrn_reflns_point_group_measured_fraction_full  0.999
_reflns_number_total              5373
_reflns_number_gt                 4233
_reflns_threshold_expression      'I > 2\s(I)'
_reflns_Friedel_coverage          0.000
_reflns_Friedel_fraction_max      .
_reflns_Friedel_fraction_full     .
 
_reflns_special_details
;
 Reflections were merged by SHELXL according to the crystal
 class for the calculation of statistics and refinement.
 
 _reflns_Friedel_fraction is defined as the number of unique
 Friedel pairs measured divided by the number that would be
 possible theoretically, ignoring centric projections and
 systematic absences.
;
 
_computing_data_collection        'CrysAlisPro (Agilent Technologies)'
_computing_cell_refinement        'CrysAlisPro (Agilent Technologies)'
_computing_data_reduction         'CrysAlisPro (Agilent Technologies)'
_computing_structure_solution     'SHELXS-97 (Sheldrick, 1997)'
_computing_structure_refinement   'SHELXL-2013 (Sheldrick, 2013)'
_computing_molecular_graphics     'Ortep-3 (L. J. Farrugia, 2001)'
_computing_publication_material   SHELXL-2013
 
_refine_special_details
;
 ?
;
_refine_ls_structure_factor_coef  Fsqd
_refine_ls_matrix_type            full
_refine_ls_weighting_scheme       calc
_refine_ls_weighting_details
'w=1/[\s^2^(Fo^2^)+(0.0980P)^2^+95.2500P] where P=(Fo^2^+2Fc^2^)/3'
_atom_sites_solution_primary      ?
_atom_sites_solution_secondary    ?
_atom_sites_solution_hydrogens    geom
_refine_ls_hydrogen_treatment     constr
_refine_ls_extinction_method      none
_refine_ls_extinction_coef        .
_refine_ls_number_reflns          5373
_refine_ls_number_parameters      301
_refine_ls_number_restraints      0
_refine_ls_R_factor_all           0.1206
_refine_ls_R_factor_gt            0.1079
_refine_ls_wR_factor_ref          0.2703
_refine_ls_wR_factor_gt           0.2583
_refine_ls_goodness_of_fit_ref    1.078
_refine_ls_restrained_S_all       1.078
_refine_ls_shift/su_max           0.000
_refine_ls_shift/su_mean          0.000
 
loop_
 _atom_site_label
 _atom_site_type_symbol
 _atom_site_fract_x
 _atom_site_fract_y
 _atom_site_fract_z
 _atom_site_U_iso_or_equiv
 _atom_site_adp_type
 _atom_site_occupancy
 _atom_site_site_symmetry_order  
 _atom_site_calc_flag
 _atom_site_refinement_flags_posn
 _atom_site_refinement_flags_adp
 _atom_site_refinement_flags_occupancy
 _atom_site_disorder_assembly
 _atom_site_disorder_group
Pd1 Pd 0.38675(2) 0.23732(7) 0.18906(4) 0.0535(3) Uani 1 1 d . . . . .
S1 S 0.39982(8) 0.0281(2) 0.31367(14) 0.0544(6) Uani 1 1 d . . . . .
P1 P 0.34817(8) 0.2969(2) 0.28036(13) 0.0487(6) Uani 1 1 d . . . . .
S2 S 0.46936(9) 0.1529(3) 0.13675(16) 0.0754(9) Uani 1 1 d . . . . .
O3 O 0.4237(2) 0.1262(7) 0.2855(4) 0.0634(18) Uani 1 1 d . . . . .
O1 O 0.3687(3) -0.0202(7) 0.2450(5) 0.074(2) Uani 1 1 d . . . . .
O4 O 0.4252(2) 0.1881(8) 0.1013(4) 0.068(2) Uani 1 1 d . . . . .
O2 O 0.4275(3) -0.0572(7) 0.3616(5) 0.077(2) Uani 1 1 d . . . . .
C23 C 0.3557(4) 0.3410(12) 0.0882(7) 0.075(3) Uani 1 1 d . . . . .
H23A H 0.3716 0.4119 0.0835 0.113 Uiso 1 1 calc R U . . .
H23B H 0.3289 0.3631 0.0988 0.113 Uiso 1 1 calc R U . . .
H23C H 0.3522 0.2961 0.0356 0.113 Uiso 1 1 calc R U . . .
C21 C 0.3740(3) 0.0217(10) 0.4625(6) 0.058(2) Uani 1 1 d . . . . .
H21 H 0.3880 -0.0512 0.4673 0.069 Uiso 1 1 calc R U . . .
C15 C 0.3069(4) 0.3465(10) 0.4443(6) 0.061(3) Uani 1 1 d . . . . .
H15 H 0.3041 0.3964 0.3965 0.073 Uiso 1 1 calc R U . . .
C13 C 0.3511(3) 0.2014(9) 0.3778(5) 0.049(2) Uani 1 1 d . . . . .
C14 C 0.3304(3) 0.2389(9) 0.4462(5) 0.053(2) Uani 1 1 d . . . . .
C22 C 0.3725(3) 0.0934(8) 0.3883(5) 0.048(2) Uani 1 1 d . . . . .
C7 C 0.2903(3) 0.2997(10) 0.2383(6) 0.058(2) Uani 1 1 d . . . . .
H7 H 0.2778 0.2832 0.2881 0.069 Uiso 1 1 calc R U . . .
C20 C 0.3553(4) 0.0582(11) 0.5266(6) 0.066(3) Uani 1 1 d . . . . .
H20 H 0.3569 0.0107 0.5753 0.079 Uiso 1 1 calc R U . . .
C19 C 0.3336(3) 0.1657(10) 0.5202(6) 0.058(2) Uani 1 1 d . . . . .
C17 C 0.2926(4) 0.3069(12) 0.5840(7) 0.074(3) Uani 1 1 d . . . . .
H17 H 0.2807 0.3307 0.6297 0.088 Uiso 1 1 calc R U . . .
C24 C 0.4693(5) -0.0056(18) 0.1331(11) 0.116(6) Uani 1 1 d . . . . .
H24A H 0.4511 -0.0362 0.1685 0.174 Uiso 1 1 calc R U . . .
H24B H 0.4970 -0.0349 0.1540 0.174 Uiso 1 1 calc R U . . .
H24C H 0.4596 -0.0318 0.0748 0.174 Uiso 1 1 calc R U . . .
C12 C 0.2769(4) 0.1970(10) 0.1759(7) 0.065(3) Uani 1 1 d . . . . .
H12A H 0.2906 0.2047 0.1276 0.078 Uiso 1 1 calc R U . . .
H12B H 0.2856 0.1219 0.2047 0.078 Uiso 1 1 calc R U . . .
C1 C 0.3698(4) 0.4435(10) 0.3259(7) 0.065(3) Uani 1 1 d . . . . .
H1 H 0.3513 0.4764 0.3614 0.078 Uiso 1 1 calc R U . . .
C8 C 0.2726(3) 0.4203(9) 0.2032(7) 0.061(2) Uani 1 1 d . . . . .
H8A H 0.2791 0.4802 0.2482 0.073 Uiso 1 1 calc R U . . .
H8B H 0.2857 0.4444 0.1562 0.073 Uiso 1 1 calc R U . . .
C6 C 0.4129(4) 0.4208(11) 0.3835(8) 0.078(3) Uani 1 1 d . . . . .
H6A H 0.4099 0.3671 0.4299 0.094 Uiso 1 1 calc R U . . .
H6B H 0.4307 0.3822 0.3498 0.094 Uiso 1 1 calc R U . . .
C18 C 0.3137(4) 0.2045(12) 0.5886(6) 0.072(3) Uani 1 1 d . . . . .
H18 H 0.3156 0.1566 0.6372 0.087 Uiso 1 1 calc R U . . .
C9 C 0.2266(4) 0.4143(11) 0.1719(8) 0.071(3) Uani 1 1 d . . . . .
H9A H 0.2169 0.4897 0.1448 0.085 Uiso 1 1 calc R U . . .
H9B H 0.2133 0.4028 0.2207 0.085 Uiso 1 1 calc R U . . .
C11 C 0.2310(4) 0.1943(12) 0.1434(8) 0.079(3) Uani 1 1 d . . . . .
H11A H 0.2175 0.1715 0.1900 0.095 Uiso 1 1 calc R U . . .
H11B H 0.2244 0.1339 0.0988 0.095 Uiso 1 1 calc R U . . .
C16 C 0.2883(4) 0.3785(11) 0.5109(6) 0.065(3) Uani 1 1 d . . . . .
H16 H 0.2727 0.4485 0.5073 0.078 Uiso 1 1 calc R U . . .
C2 C 0.3748(5) 0.5362(11) 0.2576(9) 0.087(4) Uani 1 1 d . . . . .
H2A H 0.3926 0.5037 0.2214 0.104 Uiso 1 1 calc R U . . .
H2B H 0.3478 0.5529 0.2215 0.104 Uiso 1 1 calc R U . . .
C25 C 0.4947(4) 0.1796(18) 0.0501(8) 0.100(5) Uani 1 1 d . . . . .
H25A H 0.4826 0.1297 0.0022 0.149 Uiso 1 1 calc R U . . .
H25B H 0.5238 0.1613 0.0677 0.149 Uiso 1 1 calc R U . . .
H25C H 0.4914 0.2622 0.0333 0.149 Uiso 1 1 calc R U . . .
C10 C 0.2138(4) 0.3126(11) 0.1076(7) 0.075(3) Uani 1 1 d . . . . .
H10A H 0.1836 0.3079 0.0927 0.090 Uiso 1 1 calc R U . . .
H10B H 0.2238 0.3297 0.0553 0.090 Uiso 1 1 calc R U . . .
C4 C 0.4350(5) 0.6290(15) 0.3510(12) 0.107(5) Uani 1 1 d . . . . .
H4A H 0.4464 0.7034 0.3773 0.128 Uiso 1 1 calc R U . . .
H4B H 0.4533 0.6001 0.3146 0.128 Uiso 1 1 calc R U . . .
C5 C 0.4331(5) 0.5370(14) 0.4212(10) 0.104(5) Uani 1 1 d . . . . .
H5A H 0.4611 0.5204 0.4528 0.125 Uiso 1 1 calc R U . . .
H5B H 0.4174 0.5698 0.4614 0.125 Uiso 1 1 calc R U . . .
C3 C 0.3934(6) 0.6510(13) 0.2982(13) 0.119(6) Uani 1 1 d . . . . .
H3A H 0.3954 0.7087 0.2535 0.143 Uiso 1 1 calc R U . . .
H3B H 0.3754 0.6844 0.3339 0.143 Uiso 1 1 calc R U . . .
 
loop_
 _atom_site_aniso_label
 _atom_site_aniso_U_11
 _atom_site_aniso_U_22
 _atom_site_aniso_U_33
 _atom_site_aniso_U_23
 _atom_site_aniso_U_13
 _atom_site_aniso_U_12
Pd1 0.0688(5) 0.0600(5) 0.0308(4) -0.0010(3) 0.0084(3) 0.0016(3)
S1 0.0715(15) 0.0505(13) 0.0399(11) -0.0021(9) 0.0082(10) 0.0045(10)
P1 0.0658(14) 0.0525(13) 0.0258(10) 0.0005(9) 0.0050(9) 0.0027(10)
S2 0.0728(17) 0.113(3) 0.0376(12) -0.0050(14) 0.0038(11) 0.0079(16)
O3 0.073(4) 0.071(5) 0.044(4) 0.005(3) 0.006(3) 0.004(3)
O1 0.094(6) 0.075(5) 0.049(4) -0.024(4) 0.006(4) -0.006(4)
O4 0.074(5) 0.096(6) 0.037(3) -0.010(4) 0.015(3) 0.007(4)
O2 0.096(6) 0.067(5) 0.068(5) 0.019(4) 0.020(4) 0.025(4)
C23 0.101(9) 0.091(9) 0.042(5) 0.014(5) 0.031(6) 0.014(7)
C21 0.067(6) 0.061(6) 0.040(5) 0.007(4) 0.000(4) 0.001(5)
C15 0.086(7) 0.060(6) 0.034(4) -0.004(4) 0.007(4) 0.000(5)
C13 0.060(5) 0.054(5) 0.028(4) -0.001(4) 0.000(4) -0.004(4)
C14 0.067(6) 0.062(6) 0.025(4) -0.002(4) 0.000(4) -0.002(4)
C22 0.059(5) 0.050(5) 0.030(4) -0.003(4) -0.001(4) -0.003(4)
C7 0.080(7) 0.064(6) 0.030(4) 0.006(4) 0.011(4) 0.006(5)
C20 0.088(8) 0.072(7) 0.034(5) 0.014(5) 0.003(5) 0.002(6)
C19 0.074(6) 0.063(6) 0.033(4) 0.001(4) 0.004(4) -0.002(5)
C17 0.108(9) 0.080(8) 0.037(5) -0.014(5) 0.027(6) -0.005(7)
C24 0.073(9) 0.164(18) 0.107(12) -0.012(12) 0.008(8) 0.018(10)
C12 0.085(7) 0.051(6) 0.053(6) 0.000(5) 0.000(5) -0.011(5)
C1 0.081(7) 0.061(6) 0.049(5) -0.002(5) 0.003(5) -0.001(5)
C8 0.073(6) 0.053(6) 0.050(5) -0.002(4) -0.001(5) 0.011(5)
C6 0.084(8) 0.072(8) 0.067(7) -0.004(6) -0.014(6) -0.013(6)
C18 0.103(9) 0.088(8) 0.024(4) 0.000(5) 0.010(5) -0.007(7)
C9 0.069(7) 0.071(7) 0.065(7) 0.009(6) -0.002(5) 0.016(5)
C11 0.087(8) 0.070(8) 0.070(7) -0.002(6) -0.008(6) -0.015(6)
C16 0.078(7) 0.073(7) 0.044(5) -0.013(5) 0.012(5) 0.000(5)
C2 0.099(9) 0.064(7) 0.083(8) 0.017(6) -0.017(7) -0.014(6)
C25 0.070(8) 0.175(16) 0.052(7) 0.003(8) 0.010(6) 0.009(9)
C10 0.088(8) 0.074(8) 0.053(6) 0.004(5) -0.008(5) -0.011(6)
C4 0.103(11) 0.093(11) 0.114(12) -0.007(9) -0.003(9) -0.030(9)
C5 0.112(11) 0.097(11) 0.088(10) -0.025(9) -0.015(8) -0.020(9)
C3 0.132(14) 0.053(8) 0.151(16) 0.014(9) -0.020(12) -0.015(8)
 
_geom_special_details
;
 All esds (except the esd in the dihedral angle between two l.s. planes)
 are estimated using the full covariance matrix.  The cell esds are taken
 into account individually in the estimation of esds in distances, angles
 and torsion angles; correlations between esds in cell parameters are only
 used when they are defined by crystal symmetry.  An approximate (isotropic)
 treatment of cell esds is used for estimating esds involving l.s. planes.
;
 
loop_
 _geom_bond_atom_site_label_1
 _geom_bond_atom_site_label_2
 _geom_bond_distance
 _geom_bond_site_symmetry_2
 _geom_bond_publ_flag
Pd1 C23 2.067(11) . ?
Pd1 O4 2.131(7) . ?
Pd1 O3 2.143(7) . ?
Pd1 P1 2.211(2) . ?
S1 O2 1.423(8) . ?
S1 O1 1.436(8) . ?
S1 O3 1.469(8) . ?
S1 C22 1.781(9) . ?
P1 C13 1.864(9) . ?
P1 C1 1.869(11) . ?
P1 C7 1.879(11) . ?
S2 O4 1.496(8) . ?
S2 C25 1.770(13) . ?
S2 C24 1.77(2) . ?
C23 H23A 0.9600 . ?
C23 H23B 0.9600 . ?
C23 H23C 0.9600 . ?
C21 C20 1.352(15) . ?
C21 C22 1.416(13) . ?
C21 H21 0.9300 . ?
C15 C16 1.371(14) . ?
C15 C14 1.424(14) . ?
C15 H15 0.9300 . ?
C13 C22 1.387(13) . ?
C13 C14 1.455(13) . ?
C14 C19 1.416(13) . ?
C7 C12 1.519(14) . ?
C7 C8 1.525(14) . ?
C7 H7 0.9800 . ?
C20 C19 1.388(15) . ?
C20 H20 0.9300 . ?
C19 C18 1.443(15) . ?
C17 C18 1.330(18) . ?
C17 C16 1.391(16) . ?
C17 H17 0.9300 . ?
C24 H24A 0.9600 . ?
C24 H24B 0.9600 . ?
C24 H24C 0.9600 . ?
C12 C11 1.488(16) . ?
C12 H12A 0.9700 . ?
C12 H12B 0.9700 . ?
C1 C2 1.531(16) . ?
C1 C6 1.540(16) . ?
C1 H1 0.9800 . ?
C8 C9 1.491(15) . ?
C8 H8A 0.9700 . ?
C8 H8B 0.9700 . ?
C6 C5 1.524(17) . ?
C6 H6A 0.9700 . ?
C6 H6B 0.9700 . ?
C18 H18 0.9300 . ?
C9 C10 1.528(16) . ?
C9 H9A 0.9700 . ?
C9 H9B 0.9700 . ?
C11 C10 1.501(18) . ?
C11 H11A 0.9700 . ?
C11 H11B 0.9700 . ?
C16 H16 0.9300 . ?
C2 C3 1.507(18) . ?
C2 H2A 0.9700 . ?
C2 H2B 0.9700 . ?
C25 H25A 0.9600 . ?
C25 H25B 0.9600 . ?
C25 H25C 0.9600 . ?
C10 H10A 0.9700 . ?
C10 H10B 0.9700 . ?
C4 C3 1.47(2) . ?
C4 C5 1.53(2) . ?
C4 H4A 0.9700 . ?
C4 H4B 0.9700 . ?
C5 H5A 0.9700 . ?
C5 H5B 0.9700 . ?
C3 H3A 0.9700 . ?
C3 H3B 0.9700 . ?
 
loop_
 _geom_angle_atom_site_label_1
 _geom_angle_atom_site_label_2
 _geom_angle_atom_site_label_3
 _geom_angle
 _geom_angle_site_symmetry_1
 _geom_angle_site_symmetry_3
 _geom_angle_publ_flag
C23 Pd1 O4 84.4(4) . . ?
C23 Pd1 O3 174.0(4) . . ?
O4 Pd1 O3 89.6(3) . . ?
C23 Pd1 P1 94.7(3) . . ?
O4 Pd1 P1 177.3(2) . . ?
O3 Pd1 P1 91.3(2) . . ?
O2 S1 O1 115.6(5) . . ?
O2 S1 O3 109.9(5) . . ?
O1 S1 O3 112.9(5) . . ?
O2 S1 C22 105.7(5) . . ?
O1 S1 C22 106.4(5) . . ?
O3 S1 C22 105.6(4) . . ?
C13 P1 C1 103.2(4) . . ?
C13 P1 C7 100.5(4) . . ?
C1 P1 C7 113.5(5) . . ?
C13 P1 Pd1 115.5(3) . . ?
C1 P1 Pd1 107.1(4) . . ?
C7 P1 Pd1 116.3(3) . . ?
O4 S2 C25 103.6(5) . . ?
O4 S2 C24 104.8(6) . . ?
C25 S2 C24 98.1(9) . . ?
S1 O3 Pd1 112.9(4) . . ?
S2 O4 Pd1 118.6(4) . . ?
Pd1 C23 H23A 109.5 . . ?
Pd1 C23 H23B 109.5 . . ?
H23A C23 H23B 109.5 . . ?
Pd1 C23 H23C 109.5 . . ?
H23A C23 H23C 109.5 . . ?
H23B C23 H23C 109.5 . . ?
C20 C21 C22 120.7(10) . . ?
C20 C21 H21 119.7 . . ?
C22 C21 H21 119.7 . . ?
C16 C15 C14 121.8(10) . . ?
C16 C15 H15 119.1 . . ?
C14 C15 H15 119.1 . . ?
C22 C13 C14 117.4(8) . . ?
C22 C13 P1 122.5(7) . . ?
C14 C13 P1 120.1(7) . . ?
C19 C14 C15 116.9(9) . . ?
C19 C14 C13 119.0(9) . . ?
C15 C14 C13 124.0(8) . . ?
C13 C22 C21 121.5(9) . . ?
C13 C22 S1 125.9(7) . . ?
C21 C22 S1 112.6(7) . . ?
C12 C7 C8 113.0(8) . . ?
C12 C7 P1 110.9(7) . . ?
C8 C7 P1 115.2(8) . . ?
C12 C7 H7 105.6 . . ?
C8 C7 H7 105.6 . . ?
P1 C7 H7 105.6 . . ?
C21 C20 C19 120.6(9) . . ?
C21 C20 H20 119.7 . . ?
C19 C20 H20 119.7 . . ?
C20 C19 C14 120.7(9) . . ?
C20 C19 C18 120.6(10) . . ?
C14 C19 C18 118.8(10) . . ?
C18 C17 C16 120.3(10) . . ?
C18 C17 H17 119.9 . . ?
C16 C17 H17 119.9 . . ?
S2 C24 H24A 109.5 . . ?
S2 C24 H24B 109.5 . . ?
H24A C24 H24B 109.5 . . ?
S2 C24 H24C 109.5 . . ?
H24A C24 H24C 109.5 . . ?
H24B C24 H24C 109.5 . . ?
C11 C12 C7 112.4(10) . . ?
C11 C12 H12A 109.1 . . ?
C7 C12 H12A 109.1 . . ?
C11 C12 H12B 109.1 . . ?
C7 C12 H12B 109.1 . . ?
H12A C12 H12B 107.9 . . ?
C2 C1 C6 108.3(10) . . ?
C2 C1 P1 113.9(8) . . ?
C6 C1 P1 108.3(8) . . ?
C2 C1 H1 108.7 . . ?
C6 C1 H1 108.7 . . ?
P1 C1 H1 108.7 . . ?
C9 C8 C7 111.5(9) . . ?
C9 C8 H8A 109.3 . . ?
C7 C8 H8A 109.3 . . ?
C9 C8 H8B 109.3 . . ?
C7 C8 H8B 109.3 . . ?
H8A C8 H8B 108.0 . . ?
C5 C6 C1 111.6(11) . . ?
C5 C6 H6A 109.3 . . ?
C1 C6 H6A 109.3 . . ?
C5 C6 H6B 109.3 . . ?
C1 C6 H6B 109.3 . . ?
H6A C6 H6B 108.0 . . ?
C17 C18 C19 121.7(10) . . ?
C17 C18 H18 119.1 . . ?
C19 C18 H18 119.1 . . ?
C8 C9 C10 112.2(10) . . ?
C8 C9 H9A 109.2 . . ?
C10 C9 H9A 109.2 . . ?
C8 C9 H9B 109.2 . . ?
C10 C9 H9B 109.2 . . ?
H9A C9 H9B 107.9 . . ?
C12 C11 C10 112.9(10) . . ?
C12 C11 H11A 109.0 . . ?
C10 C11 H11A 109.0 . . ?
C12 C11 H11B 109.0 . . ?
C10 C11 H11B 109.0 . . ?
H11A C11 H11B 107.8 . . ?
C15 C16 C17 120.5(11) . . ?
C15 C16 H16 119.8 . . ?
C17 C16 H16 119.8 . . ?
C3 C2 C1 111.4(12) . . ?
C3 C2 H2A 109.3 . . ?
C1 C2 H2A 109.3 . . ?
C3 C2 H2B 109.3 . . ?
C1 C2 H2B 109.3 . . ?
H2A C2 H2B 108.0 . . ?
S2 C25 H25A 109.5 . . ?
S2 C25 H25B 109.5 . . ?
H25A C25 H25B 109.5 . . ?
S2 C25 H25C 109.5 . . ?
H25A C25 H25C 109.5 . . ?
H25B C25 H25C 109.5 . . ?
C11 C10 C9 111.7(9) . . ?
C11 C10 H10A 109.3 . . ?
C9 C10 H10A 109.3 . . ?
C11 C10 H10B 109.3 . . ?
C9 C10 H10B 109.3 . . ?
H10A C10 H10B 107.9 . . ?
C3 C4 C5 111.1(14) . . ?
C3 C4 H4A 109.4 . . ?
C5 C4 H4A 109.4 . . ?
C3 C4 H4B 109.4 . . ?
C5 C4 H4B 109.4 . . ?
H4A C4 H4B 108.0 . . ?
C6 C5 C4 111.4(12) . . ?
C6 C5 H5A 109.3 . . ?
C4 C5 H5A 109.3 . . ?
C6 C5 H5B 109.3 . . ?
C4 C5 H5B 109.3 . . ?
H5A C5 H5B 108.0 . . ?
C4 C3 C2 110.5(13) . . ?
C4 C3 H3A 109.6 . . ?
C2 C3 H3A 109.6 . . ?
C4 C3 H3B 109.6 . . ?
C2 C3 H3B 109.6 . . ?
H3A C3 H3B 108.1 . . ?
 
loop_
 _geom_torsion_atom_site_label_1
 _geom_torsion_atom_site_label_2
 _geom_torsion_atom_site_label_3
 _geom_torsion_atom_site_label_4
 _geom_torsion
 _geom_torsion_site_symmetry_1
 _geom_torsion_site_symmetry_2
 _geom_torsion_site_symmetry_3
 _geom_torsion_site_symmetry_4
 _geom_torsion_publ_flag
O2 S1 O3 Pd1 166.5(4) . . . . ?
O1 S1 O3 Pd1 36.0(6) . . . . ?
C22 S1 O3 Pd1 -79.9(5) . . . . ?
C25 S2 O4 Pd1 -156.8(8) . . . . ?
C24 S2 O4 Pd1 100.8(8) . . . . ?
C1 P1 C13 C22 -123.2(8) . . . . ?
C7 P1 C13 C22 119.4(8) . . . . ?
Pd1 P1 C13 C22 -6.6(9) . . . . ?
C1 P1 C13 C14 57.1(9) . . . . ?
C7 P1 C13 C14 -60.3(8) . . . . ?
Pd1 P1 C13 C14 173.7(6) . . . . ?
C16 C15 C14 C19 0.3(15) . . . . ?
C16 C15 C14 C13 -179.3(10) . . . . ?
C22 C13 C14 C19 1.2(13) . . . . ?
P1 C13 C14 C19 -179.1(7) . . . . ?
C22 C13 C14 C15 -179.2(9) . . . . ?
P1 C13 C14 C15 0.5(13) . . . . ?
C14 C13 C22 C21 0.3(13) . . . . ?
P1 C13 C22 C21 -179.4(7) . . . . ?
C14 C13 C22 S1 179.5(7) . . . . ?
P1 C13 C22 S1 -0.2(12) . . . . ?
C20 C21 C22 C13 -1.5(15) . . . . ?
C20 C21 C22 S1 179.3(8) . . . . ?
O2 S1 C22 C13 161.1(8) . . . . ?
O1 S1 C22 C13 -75.6(9) . . . . ?
O3 S1 C22 C13 44.6(9) . . . . ?
O2 S1 C22 C21 -19.7(8) . . . . ?
O1 S1 C22 C21 103.7(8) . . . . ?
O3 S1 C22 C21 -136.1(7) . . . . ?
C13 P1 C7 C12 -90.1(7) . . . . ?
C1 P1 C7 C12 160.3(7) . . . . ?
Pd1 P1 C7 C12 35.4(8) . . . . ?
C13 P1 C7 C8 139.9(7) . . . . ?
C1 P1 C7 C8 30.4(9) . . . . ?
Pd1 P1 C7 C8 -94.5(7) . . . . ?
C22 C21 C20 C19 1.0(16) . . . . ?
C21 C20 C19 C14 0.6(17) . . . . ?
C21 C20 C19 C18 -180.0(11) . . . . ?
C15 C14 C19 C20 178.7(10) . . . . ?
C13 C14 C19 C20 -1.7(15) . . . . ?
C15 C14 C19 C18 -0.8(15) . . . . ?
C13 C14 C19 C18 178.8(10) . . . . ?
C8 C7 C12 C11 -50.7(13) . . . . ?
P1 C7 C12 C11 178.2(8) . . . . ?
C13 P1 C1 C2 174.4(9) . . . . ?
C7 P1 C1 C2 -77.7(10) . . . . ?
Pd1 P1 C1 C2 52.0(10) . . . . ?
C13 P1 C1 C6 53.8(9) . . . . ?
C7 P1 C1 C6 161.7(8) . . . . ?
Pd1 P1 C1 C6 -68.5(8) . . . . ?
C12 C7 C8 C9 51.5(12) . . . . ?
P1 C7 C8 C9 -179.6(7) . . . . ?
C2 C1 C6 C5 54.4(15) . . . . ?
P1 C1 C6 C5 178.4(10) . . . . ?
C16 C17 C18 C19 2(2) . . . . ?
C20 C19 C18 C17 -179.7(12) . . . . ?
C14 C19 C18 C17 -0.2(18) . . . . ?
C7 C8 C9 C10 -53.0(13) . . . . ?
C7 C12 C11 C10 51.7(14) . . . . ?
C14 C15 C16 C17 1.2(17) . . . . ?
C18 C17 C16 C15 -2.3(19) . . . . ?
C6 C1 C2 C3 -57.8(16) . . . . ?
P1 C1 C2 C3 -178.4(11) . . . . ?
C12 C11 C10 C9 -53.3(15) . . . . ?
C8 C9 C10 C11 54.3(14) . . . . ?
C1 C6 C5 C4 -53.9(18) . . . . ?
C3 C4 C5 C6 55(2) . . . . ?
C5 C4 C3 C2 -58(2) . . . . ?
C1 C2 C3 C4 61(2) . . . . ?
 
_refine_diff_density_max    2.160
_refine_diff_density_min   -1.732
_refine_diff_density_rms    0.226

_shelxl_version_number 2013-4

_shelx_res_file
;
TITL WZX1512 in C2/c
CELL  1.54184  32.7912  11.1661  15.8654   90.000  101.751   90.000
ZERR     8.00   0.0014   0.0004   0.0005    0.000    0.004    0.000
LATT   7
SYMM  - X,   Y, 1/2 - Z
SFAC  C    H    P    S    PD   O
UNIT  200  296  8   16   8   32
MERG   2
FMAP   2
PLAN   25
L.S.   4
acta
bond $H
conf
size 0.36 0.32 0.25
WGHT    0.098000   95.250000
FVAR       1.63647
PD1   5    0.386751    0.237316    0.189064    11.00000    0.06879    0.06003 =
         0.03084   -0.00104    0.00841    0.00162
S1    4    0.399819    0.028056    0.313675    11.00000    0.07153    0.05050 =
         0.03988   -0.00215    0.00816    0.00448
P1    3    0.348167    0.296883    0.280363    11.00000    0.06584    0.05254 =
         0.02583    0.00054    0.00495    0.00267
S2    4    0.469360    0.152909    0.136750    11.00000    0.07284    0.11265 =
         0.03763   -0.00499    0.00383    0.00794
O3    6    0.423731    0.126190    0.285481    11.00000    0.07257    0.07092 =
         0.04438    0.00531    0.00621    0.00384
O1    6    0.368732   -0.020169    0.245013    11.00000    0.09366    0.07550 =
         0.04901   -0.02395    0.00578   -0.00600
O4    6    0.425177    0.188113    0.101310    11.00000    0.07355    0.09584 =
         0.03725   -0.01034    0.01463    0.00678
O2    6    0.427479   -0.057159    0.361641    11.00000    0.09637    0.06746 =
         0.06772    0.01855    0.01972    0.02465
C23   1    0.355702    0.341007    0.088232    11.00000    0.10061    0.09104 =
         0.04161    0.01443    0.03071    0.01362
AFIX 137
H23A  2    0.371614    0.411950    0.083456    11.00000   -1.50000
H23B  2    0.328893    0.363109    0.098775    11.00000   -1.50000
H23C  2    0.352180    0.296118    0.035638    11.00000   -1.50000
AFIX   0
C21   1    0.373987    0.021730    0.462541    11.00000    0.06693    0.06124 =
         0.04008    0.00730   -0.00011    0.00121
AFIX  43
H21   2    0.387996   -0.051153    0.467285    11.00000   -1.20000
AFIX   0
C15   1    0.306925    0.346473    0.444299    11.00000    0.08583    0.06008 =
         0.03396   -0.00378    0.00701   -0.00043
AFIX  43
H15   2    0.304112    0.396368    0.396526    11.00000   -1.20000
AFIX   0
C13   1    0.351138    0.201401    0.377798    11.00000    0.06013    0.05368 =
         0.02824   -0.00054    0.00007   -0.00406
C14   1    0.330434    0.238894    0.446248    11.00000    0.06693    0.06166 =
         0.02490   -0.00245   -0.00032   -0.00185
C22   1    0.372484    0.093397    0.388335    11.00000    0.05911    0.05034 =
         0.03025   -0.00336   -0.00063   -0.00329
C7    1    0.290322    0.299693    0.238256    11.00000    0.08007    0.06358 =
         0.02968    0.00581    0.01078    0.00587
AFIX  13
H7    2    0.277787    0.283172    0.288088    11.00000   -1.20000
AFIX   0
C20   1    0.355264    0.058165    0.526583    11.00000    0.08832    0.07227 =
         0.03395    0.01355    0.00265    0.00247
AFIX  43
H20   2    0.356890    0.010709    0.575328    11.00000   -1.20000
AFIX   0
C19   1    0.333646    0.165715    0.520231    11.00000    0.07409    0.06328 =
         0.03327    0.00099    0.00397   -0.00184
C17   1    0.292633    0.306903    0.583951    11.00000    0.10815    0.08040 =
         0.03728   -0.01418    0.02715   -0.00514
AFIX  43
H17   2    0.280738    0.330735    0.629692    11.00000   -1.20000
AFIX   0
C24   1    0.469253   -0.005643    0.133077    11.00000    0.07314    0.16391 =
         0.10675   -0.01211    0.00751    0.01849
AFIX 137
H24A  2    0.451129   -0.036203    0.168504    11.00000   -1.50000
H24B  2    0.497002   -0.034896    0.153953    11.00000   -1.50000
H24C  2    0.459569   -0.031758    0.074783    11.00000   -1.50000
AFIX   0
C12   1    0.276862    0.197037    0.175933    11.00000    0.08453    0.05115 =
         0.05330    0.00041    0.00020   -0.01105
AFIX  23
H12A  2    0.290634    0.204712    0.127580    11.00000   -1.20000
H12B  2    0.285636    0.121903    0.204658    11.00000   -1.20000
AFIX   0
C1    1    0.369754    0.443482    0.325872    11.00000    0.08113    0.06095 =
         0.04887   -0.00193    0.00321   -0.00138
AFIX  13
H1    2    0.351259    0.476446    0.361407    11.00000   -1.20000
AFIX   0
C8    1    0.272619    0.420252    0.203232    11.00000    0.07294    0.05349 =
         0.04961   -0.00247   -0.00072    0.01052
AFIX  23
H8A   2    0.279096    0.480208    0.248215    11.00000   -1.20000
H8B   2    0.285651    0.444429    0.156248    11.00000   -1.20000
AFIX   0
C6    1    0.412853    0.420789    0.383478    11.00000    0.08443    0.07197 =
         0.06657   -0.00359   -0.01382   -0.01331
AFIX  23
H6A   2    0.409886    0.367110    0.429923    11.00000   -1.20000
H6B   2    0.430713    0.382172    0.349847    11.00000   -1.20000
AFIX   0
C18   1    0.313695    0.204506    0.588619    11.00000    0.10328    0.08817 =
         0.02431   -0.00025    0.01045   -0.00713
AFIX  43
H18   2    0.315614    0.156646    0.637243    11.00000   -1.20000
AFIX   0
C9    1    0.226600    0.414262    0.171941    11.00000    0.06945    0.07065 =
         0.06514    0.00930   -0.00237    0.01558
AFIX  23
H9A   2    0.216854    0.489723    0.144850    11.00000   -1.20000
H9B   2    0.213331    0.402807    0.220689    11.00000   -1.20000
AFIX   0
C11   1    0.230980    0.194323    0.143357    11.00000    0.08747    0.06963 =
         0.06996   -0.00208   -0.00771   -0.01502
AFIX  23
H11A  2    0.217504    0.171473    0.189989    11.00000   -1.20000
H11B  2    0.224420    0.133861    0.098750    11.00000   -1.20000
AFIX   0
C16   1    0.288330    0.378479    0.510921    11.00000    0.07805    0.07339 =
         0.04417   -0.01273    0.01179    0.00022
AFIX  43
H16   2    0.272729    0.448536    0.507262    11.00000   -1.20000
AFIX   0
C2    1    0.374770    0.536199    0.257626    11.00000    0.09858    0.06381 =
         0.08278    0.01726   -0.01719   -0.01375
AFIX  23
H2A   2    0.392585    0.503715    0.221355    11.00000   -1.20000
H2B   2    0.347762    0.552860    0.221483    11.00000   -1.20000
AFIX   0
C25   1    0.494677    0.179565    0.050064    11.00000    0.07005    0.17543 =
         0.05202    0.00292    0.00998    0.00900
AFIX 137
H25A  2    0.482573    0.129700    0.002193    11.00000   -1.50000
H25B  2    0.523773    0.161268    0.067695    11.00000   -1.50000
H25C  2    0.491413    0.262180    0.033299    11.00000   -1.50000
AFIX   0
C10   1    0.213798    0.312591    0.107553    11.00000    0.08775    0.07392 =
         0.05299    0.00441   -0.00806   -0.01121
AFIX  23
H10A  2    0.183646    0.307925    0.092689    11.00000   -1.20000
H10B  2    0.223799    0.329687    0.055339    11.00000   -1.20000
AFIX   0
C4    1    0.434974    0.628967    0.351018    11.00000    0.10332    0.09291 =
         0.11399   -0.00745   -0.00270   -0.02957
AFIX  23
H4A   2    0.446355    0.703440    0.377266    11.00000   -1.20000
H4B   2    0.453321    0.600096    0.314618    11.00000   -1.20000
AFIX   0
C5    1    0.433139    0.536984    0.421246    11.00000    0.11193    0.09699 =
         0.08815   -0.02479   -0.01523   -0.02050
AFIX  23
H5A   2    0.461147    0.520351    0.452756    11.00000   -1.20000
H5B   2    0.417385    0.569758    0.461409    11.00000   -1.20000
AFIX   0
C3    1    0.393389    0.651011    0.298219    11.00000    0.13250    0.05349 =
         0.15105    0.01413   -0.02025   -0.01481
AFIX  23
H3A   2    0.395398    0.708720    0.253547    11.00000   -1.20000
H3B   2    0.375442    0.684360    0.333887    11.00000   -1.20000
AFIX   0
HKLF    4

REM  WZX1512 in C2/c
REM R1 =  0.1079 for    4233 Fo > 4sig(Fo)  and  0.1206 for all    5373 data
REM    301 parameters refined using      0 restraints

END

WGHT      0.2000      0.0000

REM Highest difference peak  2.160,  deepest hole -1.732,  1-sigma level  0.226
Q1    1   0.3577  0.2412  0.1812  11.00000  0.05    2.16
Q2    1   0.3864  0.3355  0.1856  11.00000  0.05    2.06
Q3    1   0.4166  0.2392  0.2020  11.00000  0.05    1.99
Q4    1   0.3708  0.2634  0.2346  11.00000  0.05    1.72
Q5    1   0.3940  0.1838  0.1505  11.00000  0.05    1.65
Q6    1   0.3484  0.1970  0.2825  11.00000  0.05    1.46
Q7    1   0.4229  0.2938  0.1022  11.00000  0.05    1.07
Q8    1   0.4292  0.0339  0.3252  11.00000  0.05    0.97
Q9    1   0.1607  0.2385  0.0636  11.00000  0.05    0.92
Q10   1   0.3186  0.3030  0.2692  11.00000  0.05    0.89
Q11   1   0.4296  0.3223  0.6026  11.00000  0.05    0.82
Q12   1   0.4632  0.2322  0.1728  11.00000  0.05    0.80
Q13   1   0.4406  0.3340  0.6122  11.00000  0.05    0.79
Q14   1   0.4420  0.0859  0.2229  11.00000  0.05    0.79
Q15   1   0.3698  0.0310  0.2960  11.00000  0.05    0.78
Q16   1   0.4776  0.1777  0.0872  11.00000  0.05    0.70
Q17   1   0.3890  0.0621  0.3622  11.00000  0.05    0.70
Q18   1   0.4683  0.2163  0.0803  11.00000  0.05    0.69
Q19   1   0.4373  0.1591  0.2304  11.00000  0.05    0.68
Q20   1   0.3709  0.1814  0.3865  11.00000  0.05    0.67
Q21   1   0.4007  0.1226  0.3267  11.00000  0.05    0.63
Q22   1   0.3881  0.0236  0.1897  11.00000  0.05    0.63
Q23   1   0.5384  0.6275  0.3572  11.00000  0.05    0.62
Q24   1   0.4473  0.1698  0.1907  11.00000  0.05    0.61
Q25   1   0.3585  0.2600  0.1087  11.00000  0.05    0.60
;
_shelx_res_checksum   42394

_shelx_hkl_file
;
   0   0  -2 208490. 5715.28  28
   0   0  -2 332875. 6841.88  33
   0   0  -3 168.299 246.430  33
   0   0  -3 59.3135 61.2099  36
   0   0   3 158.090 132.017   1
   0   0  -4 76368.1 3899.67  36
   0   0  -4 83766.3 4951.58  33
   0   0   5 248.735 202.313   1
   0   0  -5-0.98244 91.5220  36
   0   0  -5 119.879 247.545  37
   0   0   5 46.2682 254.785  29
   0   0  -5-91.7592 164.783  33
   0   0  -5 31.7598 82.7902  40
   0   0  -5 191.365 288.114  38
   0   0  -6 83042.8 5095.30  38
   0   0  -6 54760.2 3349.97  40
   0   0   6 81574.3 3533.87   1
   0   0  -6 52100.8 4900.64  33
   0   0   6 36021.5 4576.78  29
   0   0  -6 41806.7 4189.04  37
   0   0  -6 50146.6 3908.23  36
   0   0  -7 262.705 354.254  37
   0   0   7-48.3843 221.616   1
   0   0  -7-120.882 263.176  40
   0   0  -7 34.3212 516.081  33
   0   0  -7-45.4904 298.657  38
   0   0  -7-10.8157 275.114  36
   0   0  -8 66711.4 6600.47  37
   0   0  -8 114789. 7656.23  38
   0   0   8 103072. 4539.84   1
   0   0  -8 103819. 7275.30  36
   0   0  -8 81694.1 7320.37  33
   0   0  -9-528.037 751.784  33
   0   0  -9-126.072 134.414  38
   0   0  -9 309.950 406.826  36
   0   0 -10 85911.5 7429.99  36
   0   0 -10 83867.5 7227.81  38
   0   0 -11-298.686 458.645  38
   0   0 -12 16311.3 3312.93  31
   0   0 -12 13750.7 2389.37  13
   0   0 -13-321.036 808.601  31
   0   0 -13-94.6153 302.859  16
   0   0 -13-231.696 538.119  13
   0   0 -14 10657.9 2230.58  16
   0   0 -14 14815.7 3482.60  31
   0   0 -14 13901.0 2726.79  13
   0   0 -15-91.6809 601.246  31
   0   0 -15-216.590 266.788  13
   0   0 -15 207.414 388.675  16
   0   0 -16 20364.5 3097.74  16
   0   0 -16 22098.7 3810.58  13
   0   0 -16 25968.1 4467.25  31
   0   0 -16 25795.8 3650.63  14
   0   0 -17 374.828 396.779  13
   0   0 -17 657.890 754.194  14
   0   0 -17-562.082 786.486  16
   0   0 -18 9789.38 2309.32  13
   0   0 -18 12881.6 2117.39  16
   0   0 -18 13154.0 2437.47  14
   0   2   0 489484. 6347.88   2
   0   2   1 59003.9 2126.35   2
   0   2  -1 56097.7 2173.30   2
   0   2  -2 38874.5 1272.66  40
   0   2   2 51945.0 1991.39   2
   0   2   2 42860.6 1823.72  35
   0   2  -2 46735.2 2030.65   2
   0  -2  -2 38879.7 5698.30  30
   0  -2  -2 31181.1 4930.22  34
   0  -2  -3 5753.56 1842.77  33
   0   2  -3 5589.91 640.309  40
   0   2  -3 6510.67 792.684   2
   0   2   3 13133.4 1010.87   2
   0   2   3 10254.0 1052.85  35
   0   2  -3 2872.54 1203.04  29
   0  -2  -4 17982.4 3256.08  33
   0  -2  -4 17463.2 3206.26  39
   0   2  -4 21634.4 2332.22  36
   0   2   4 12068.6 3322.80  30
   0   2  -4 13207.6 1182.72  40
   0   2   4 18424.0 1174.52   2
   0   2  -4 11238.1 2329.74  29
   0   2  -4 13241.6 1157.12   2
   0  -2  -5 53230.1 5856.49  33
   0   2  -5 47366.2 5340.39  29
   0   2  -5 42736.4 2088.33   2
   0   2  -5 65232.8 4402.85  38
   0  -2  -5 55858.4 5966.09  39
   0   2  -5 45020.7 5117.54  28
   0   2   5 48807.6 1975.90   2
   0   2  -5 42118.1 2435.56  40
   0   2  -5 55105.4 4373.04  36
   0  -2  -5 62267.5 3912.91  36
   0   2   5 32207.5 5475.93  30
   0   2  -6 2438.56 981.372  36
   0   2  -6 2404.73 636.792  40
   0   2  -6 3589.38 1118.12  38
   0  -2  -6 3510.21 1526.26  33
   0  -2  -6 3215.30 959.926  36
   0   2  -6 3192.77 1391.37  28
   0   2  -7 1030.67 450.282  40
   0  -2  -7 1924.67 1282.88  33
   0   2  -7 1432.20 868.849  36
   0  -2  -7 2542.64 941.447  36
   0   2  -7 2219.95 966.245  38
   0   2  -7 1107.39 854.643  28
   0   2  -8 106035. 7056.93  38
   0  -2  -8 99588.4 9299.44  33
   0   2  -8 96217.0 9267.81  28
   0   2  -8 85321.0 7716.25  37
   0  -2  -8 122660. 6885.99  36
   0   2  -9 494.983 387.519  38
   0  -2  -9 450.458 510.648  33
   0   2  -9-203.854 562.941  36
   0   2  -9 316.881 609.577  37
   0  -2 -10 69001.6 8771.55  33
   0   2 -10 58306.9 7419.03  37
   0   2 -10 64858.1 6451.43  38
   0   2 -11 1882.35 1298.56  37
   0  -2 -11 2819.63 2051.75  33
   0   2 -11 2622.09 1259.90  38
   0   2 -12 5888.45 1501.63  13
   0   2 -12 8524.48 2439.56  31
   0   2 -12 6323.01 1477.07  19
   0  -2 -12 7802.34 2538.21  31
   0   2 -12 5749.83 1349.07  16
   0  -2 -12 7062.51 1348.96  27
   0   2 -13 2261.98 985.605  13
   0  -2 -13 2249.33 825.829  27
   0   2 -13 2118.06 915.767  16
   0   2 -13 3135.90 1145.88  14
   0  -2 -13 1714.39 1198.54  31
   0   2 -13 2537.08 1334.52  31
   0  -2 -14 363.465 365.391  27
   0   2 -14-55.4668 369.623  13
   0   2 -14 298.049 292.812  14
   0   2 -14 517.606 443.598  16
   0   2 -14 67.0348 314.239  31
   0   2 -15 3014.96 1307.21  14
   0   2 -15 2117.80 698.103  16
   0  -2 -15 1605.46 790.801  16
   0   2 -15 2511.58 1184.86  13
   0   2 -15 3361.05 1761.21  31
   0  -2 -16 4935.43 1657.91  16
   0   2 -16 5968.02 1976.46  31
   0   2 -16 4812.14 1713.96  13
   0   2 -16 4171.66 1311.16  16
   0   2 -16 5776.18 1770.93  14
   0   2 -17 4948.08 1667.26  14
   0  -2 -17 4051.89 1265.81  14
   0   2 -17 4565.31 1604.79  13
   0   2 -17 5847.97 1921.14  31
   0  -2 -17 3473.06 1181.22  16
   0   2 -18 2486.25 995.744  15
   0   2 -18 2818.67 1221.14  14
   0   2 -18 1422.94 918.026  13
   0  -2 -18 2578.38 1025.36  16
   0  -2 -18 2284.61 883.469  14
   0   4   0 194418. 5824.63   2
   0   4  -1 65948.6 3427.30   2
   0   4   1 67792.1 2810.92  35
   0   4   1 66615.8 3346.36   2
   0   4   2 153767. 5100.67   2
   0   4   2 158895. 4344.42  35
   0   4  -2 149129. 5269.54   2
   0   4   3 28330.0 2178.93   2
   0   4  -3 26325.0 2320.30   2
   0  -4  -3 22323.3 6320.42  34
   0   4   3 29650.8 2018.61  35
   0   4   4 19521.1 1783.80   2
   0   4  -4 19909.5 2025.25   2
   0   4   5 135359. 4893.42  35
   0   4   5 105470. 4160.15   2
   0  -4  -5 153193. 13465.1  39
   0  -4  -5 136948. 12753.0  33
   0   4  -5 109289. 4954.94   2
   0   4  -6 22587.1 3443.72  38
   0   4  -6 24355.7 3554.98  36
   0   4  -6 14865.9 1863.17   2
   0   4   6 17855.6 1907.22  35
   0  -4  -6 19171.1 4794.48  33
   0  -4  -6 18397.7 4531.77  39
   0   4  -7 13255.8 2717.24  38
   0   4   7 10247.3 1551.77  35
   0   4  -7 13607.7 2974.83  36
   0  -4  -7 9075.77 3326.25  39
   0   4  -7 13435.5 3858.18  28
   0  -4  -7 10760.5 3610.46  33
   0   4  -8 165904. 10216.1  38
   0   4  -8 161481. 11687.3  36
   0  -4  -8 158354. 14470.6  33
   0   4   8 146197. 6335.88  35
   0   4  -8 165177. 14402.8  28
   0   4  -9 1919.33 1310.42  28
   0  -4  -9 3169.44 2048.94  33
   0   4  -9 2455.60 1533.38  36
   0   4  -9 2492.33 1292.28  38
   0   4 -10 32033.2 6854.82  28
   0   4 -10 27123.7 4455.25  38
   0  -4 -10 27452.3 6342.95  33
   0   4 -10 28006.2 5748.30  37
   0  -4 -11-194.910 631.954  18
   0  -4 -11-51.3986 645.164  17
   0   4 -11 51.7575 215.997  21
   0   4 -11-214.694 717.038  31
   0   4 -11-88.3274 659.023  16
   0   4 -11-355.326 345.632  14
   0  -4 -11 493.070 411.899  27
   0  -4 -12 385.498 253.176  27
   0   4 -12 766.875 126.783  14
   0   4 -12 54.1793 203.146  16
   0  -4 -12 1179.21 796.446  17
   0   4 -12 421.209 265.033  21
   0   4 -12 499.938 403.550  31
   0   4 -13-256.495 414.879  14
   0   4 -13 363.247 354.541  13
   0   4 -13 39.8944 166.604  31
   0  -4 -13-185.349 294.691  27
   0   4 -14 31002.9 4309.68  14
   0   4 -14 31652.1 4870.64  31
   0   4 -14 26577.9 3804.51  13
   0  -4 -14 31433.3 3250.75  27
   0   4 -15 5690.07 1815.94  13
   0   4 -15 4746.99 1831.89  15
   0   4 -15 7328.98 2163.95  31
   0  -4 -15 4909.22 1291.25  27
   0   4 -15 5979.23 1803.92  14
   0   4 -16 21878.9 3525.46  13
   0  -4 -16 24510.3 2955.68  27
   0   4 -16 24448.1 3922.83  31
   0   4 -16 22303.9 3500.24  15
   0  -4 -16 13585.2 2472.89  16
   0   4 -17 6349.54 1738.28  31
   0   4 -17 6278.09 1836.57  13
   0  -4 -17 4245.66 1180.72  27
   0  -4 -17 4594.97 1224.78  14
   0   4 -17 5305.00 1538.56  15
   0  -4 -17 3159.66 1080.23  16
   0   4 -18 8084.99 1724.46  15
   0   4 -18 6781.36 1812.57  13
   0  -4 -18 5488.49 1152.92  16
   0   6   0 968.835 535.584   2
   0  -6  -1 56.5966 3010.86  34
   0   6   1 715.027 433.365   2
   0   6  -1 431.413 208.535   2
   0  -6  -2 18410.1 6885.89  34
   0   6   2 24296.3 2626.99   2
   0   6  -2 26783.7 2949.52   2
   0   6   3 6537.29 1210.42  35
   0   6  -3 6241.35 1522.48   2
   0   6   3 6017.00 1316.60   2
   0  -6  -3 5428.72 3397.34  34
   0   6   4 1166.06 543.007  35
   0   6  -4 510.881 409.972   2
   0   6   4 1231.90 612.980   2
   0  -6  -5 4341.50 2638.87  33
   0   6   5 5714.08 1240.70   2
   0   6  -5 6459.25 1571.93   2
   0  -6  -5 9438.59 4178.68  39
   0   6   5 7114.45 1282.70  35
   0  -6  -6 33343.0 7753.74  39
   0  -6  -6 31472.5 7378.18  33
   0   6  -6 29887.3 3469.65   2
   0   6   6 31029.0 2776.13  35
   0   6  -7 47388.3 6290.91  38
   0  -6  -7 31508.5 7456.02  33
   0  -6  -7 32245.7 7632.51  39
   0   6   7 31384.6 2898.57  35
   0   6  -7 49573.6 6517.25  36
   0  -6  -8 52021.2 9699.81  39
   0   6  -8 65187.7 8242.11  36
   0   6  -8 57407.0 7013.11  38
   0   6  -8 66650.0 10864.4  28
   0  -6  -8 47352.2 9599.29  33
   0  -6  -9 23790.3 2395.94  27
   0   6  -9 43298.2 5711.12  31
   0  -6   9 34979.9 3437.56   9
   0  -6  -9 26453.1 3330.76  18
   0   6  -9 25258.8 3671.78  15
   0   6  -9 36986.0 3970.53  21
   0  -6 -10 19083.6 2888.02  18
   0  -6 -10 24191.8 2580.95  27
   0  -6 -10 35482.0 5798.85  17
   0   6 -10 24434.6 3764.52  15
   0   6 -10 23413.5 3316.47  21
   0   6 -10 29159.8 4793.47  31
   0  -6 -11-117.966 282.701  18
   0   6 -11 516.025 617.821  31
   0   6 -11 257.946 335.231  21
   0   6 -11-83.2026 790.904  15
   0  -6 -11 1407.81 1117.59  17
   0  -6 -11 256.068 274.662  27
   0  -6 -12 55.5559 402.836  18
   0   6 -12 185.562 366.813  21
   0   6 -12 189.110 172.685  13
   0   6 -12-68.3344 390.376  15
   0   6 -12-795.701 784.517  31
   0  -6 -12 612.753 475.709  27
   0  -6 -12 610.615 1091.51  17
   0   6 -13 4084.35 1291.46  13
   0  -6 -13 4781.76 1177.40  27
   0   6 -13 5278.14 1670.07  15
   0  -6 -13 3594.22 1719.95  17
   0   6 -13 5481.99 2069.10  31
   0  -6 -14 7142.91 1512.88  27
   0   6 -14 5248.16 1631.65  13
   0   6 -14 6378.88 1912.59  15
   0   6 -14 7993.56 2368.18  31
   0   6 -15 22472.5 3458.42  15
   0  -6 -15 24519.5 2794.56  27
   0   6 -15 23039.8 3735.51  31
   0   6 -15 19566.6 3034.66  13
   0   6 -16 9099.46 2095.27  31
   0   6 -16 6638.69 1666.54  13
   0   6 -16 10918.1 2258.53  15
   0  -6 -16 8094.10 1518.88  27
   0  -6 -16 2968.85 1015.93  16
   0  -8   0 515.827 1291.18  34
   0   8   0 1409.94 789.056   2
   0  -8   1-2108.08 3032.10  34
   0   8   1 841.655 465.972   2
   0  -8  -1 1873.27 1956.42  34
   0   8  -1 1514.97 911.588   2
   0   8  -2 6349.18 1712.82   2
   0   8   2 7512.03 1821.45   2
   0  -8  -2 4056.48 2746.32  34
   0  -8  -3-109.134 1703.23  34
   0   8   3 1358.98 710.481   2
   0   8  -3 2178.02 1106.45   2
   0  -8  -4 3658.79 1008.20  25
   0   8  -4 4654.02 2021.51  31
   0  -8  -4 5448.26 1363.88  11
   0   8   4 2641.29 1050.99   2
   0  -8   4 3010.63 948.681   9
   0  -8  -4 1086.92 2790.60   3
   0   8  -4 2942.93 1171.21   2
   0  -8  -5-5.84546 625.819   3
   0  -8  -5 524.714 297.545  25
   0  -8  -5 1071.23 649.668  11
   0  -8   5 1036.22 554.146   9
   0   8  -5 385.400 538.245  31
   0  -8  -6 16674.1 2363.91  25
   0  -8   6 17576.4 2582.40   9
   0  -8  -6 21834.9 2417.60  11
   0  -8  -6 20006.7 4950.15   3
   0   8  -6 25109.9 4785.29  31
   0  -8  -7 2060.06 658.788  27
   0   8  -7 3388.55 1717.24  31
   0  -8  -7 2187.80 798.336  25
   0  -8   7 2062.72 877.663   9
   0  -8  -7 2763.58 811.849  11
   0   8  -7 2281.72 912.657  15
   0  -8  -8 29993.8 2768.17  11
   0  -8   8 26813.8 3362.82   9
   0   8  -8 22653.0 3796.54  15
   0  -8  -8 29264.9 2810.54  27
   0   8  -8 32879.6 5385.81  31
   0   8  -9 3025.69 1432.16  15
   0   8  -9 3106.41 1591.88  31
   0  -8   9 2195.36 958.396   9
   0  -8  -9 2050.33 751.142  27
   0  -8  -9 847.685 244.222  18
   0   8 -10 4472.67 1821.64  31
   0  -8  10 3381.81 1245.39   9
   0  -8 -10 4782.25 2021.14  17
   0  -8 -10 3691.97 1043.50  27
   0  -8 -10 3109.56 1077.33  18
   0   8 -10 2968.77 1377.86  15
   0  -8 -11 305.258 240.507  27
   0  -8 -11 538.250 287.557  18
   0  -8 -11-689.279 1998.21  17
   0   8 -11 163.565 826.921  31
   0   8 -11 457.902 387.209  15
   0  -8  11 633.984 646.965   9
   0   8 -12 644.504 641.336  15
   0  -8 -12 864.417 1259.49  17
   0  -8 -12 344.940 351.040  27
   0   8 -12-997.456 940.610  31
   0  -8 -12 229.488 352.516  18
   0  -8 -13 1865.80 690.928  27
   0   8 -13 2881.48 1216.72  31
   0   8 -13 2609.90 1185.06  15
   0   8 -14 2431.59 1076.55  31
   0  -8 -14 2332.62 802.192  27
   0  -8 -15 3323.47 910.559  27
   0   8 -15 4219.09 1257.35  31
   0 -10   0 5830.39 1620.01   9
   0 -10   0 4074.67 1219.82  25
   0 -10  -1 31562.6 3457.00  25
   0 -10   1 33202.8 3454.14  25
   0 -10   1 41219.5 4364.78   9
   0 -10  -2 772.947 1512.22   3
   0 -10   2 384.871 382.030   9
   0 -10   2 689.067 490.184  25
   0 -10  -2 831.704 656.527  25
   0 -10   3 2580.38 1045.17   9
   0 -10   3 1753.12 784.324  25
   0 -10  -3 188.321 1806.48   3
   0 -10  -3 2231.95 981.497  25
   0  10  -3 1557.52 1038.45  31
   0 -10   4 240.025 416.854   9
   0 -10  -4-661.443 2249.46   3
   0 -10  -4 135.854 266.591  25
   0  10  -4-102.609 1226.11  31
   0 -10  -4 523.049 296.308  11
   0 -10  -5 2832.97 968.757  11
   0  10  -5 1233.44 997.116  31
   0 -10  -5 795.447 1251.27   3
   0 -10   5 2521.40 1061.29   9
   0 -10  -5 1873.88 876.345  25
   0 -10   6 16728.6 2804.66   9
   0  10  -6 17885.2 3966.21  31
   0 -10  -6 14893.4 2109.10  11
   0 -10  -6 14983.2 2518.00  25
   0 -10  -7 31754.5 3645.48  26
   0 -10  -7 28522.8 3494.06  25
   0 -10   7 33288.9 3999.23   9
   0  10  -7 30924.4 5079.78  31
   0 -10  -7 30385.6 2849.02  11
   0 -10  -8 13599.5 1784.69  11
   0 -10   8 16225.2 2799.39   9
   0  10  -8 16399.8 3515.97  31
   0 -10  -9 9829.18 1406.21  11
   0 -10  -9 4936.11 1229.25  18
   0 -10  -9 7017.98 2546.48  17
   0 -10   9 12306.5 2400.86   9
   0  10  -9 11824.9 2878.99  31
   0  10 -10 724.159 714.061  31
   0 -10 -10 1144.19 753.372  17
   0 -10 -10 264.336 317.482  18
   0 -10  10 523.793 487.934   9
   0  10 -11 2850.03 1180.74  31
   0 -10 -11 181.420 173.090  18
   0 -10 -11 426.398 449.329  17
   0 -10 -11 3265.06 870.308  27
   0 -10  11 3968.41 1234.80   9
   0 -10 -12 833.015 748.322  17
   0 -10 -12 212.358 202.552  27
   0  10 -12-85.5802 333.792  31
   0 -12   0 369.942 671.876   3
   0  12   0-118.497 200.834  31
   0 -12   0 482.436 411.636   6
   0 -12   0 93.0167 154.777  25
   0  12   1 2012.92 1154.05  31
   0  12  -1 2428.09 1403.57  31
   0 -12   1 3044.39 1082.07   6
   0 -12   1 3009.72 1091.56  25
   0 -12   1 393.539 1239.08   3
   0 -12  -1 3471.51 1155.22  25
   0 -12  -1 434.535 292.574   3
   0 -12   2 472.861 310.447  25
   0 -12   2 1859.08 1957.26   3
   0 -12  -2 789.247 955.739   3
   0 -12  -2 671.061 537.891  25
   0  12  -2 158.821 674.614  31
   0 -12   2 658.698 528.570   6
   0 -12  -3 4208.17 1294.50  25
   0 -12  -3-1026.45 1815.77   3
   0  12  -3 3114.67 1580.82  31
   0 -12   3-1220.48 1450.76   3
   0 -12   3 4092.65 1172.66  25
   0 -12   3 4436.35 1247.72   6
   0  12  -4 368.892 205.666  31
   0 -12  -4 1267.44 678.879  25
   0 -12  -5 206.441 375.296  26
   0  12  -5 130.170 471.989  31
   0 -12  -6 558.327 355.254  18
   0 -12  -6 1118.92 537.209  26
   0  12  -6 1410.68 1005.54  31
   0 -12   7 478.433 475.931   6
   0 -12  -7 250.502 366.158  18
   0 -12  -7 217.902 221.250  26
   0 -12  -7-143.637 602.022  17
   0  12  -7 242.612 494.300  31
   0 -12   8 2140.58 755.315   6
   0 -12  -8 751.661 381.097  18
   0  12  -8 960.598 582.091  31
   0 -12  -8 1086.95 768.912  17
   1   1 -19 13470.9 2258.19  15
   1  -1 -18 2379.07 1012.85  14
   1   1 -18 2323.94 1038.18  14
   1   1 -18 2878.25 1208.44  13
   1  -1 -18 2032.08 690.143  16
   1  -1 -17 8732.02 1920.12  16
   1  -1 -17 11078.1 2318.30  14
   1   1 -17 12754.1 2596.23  14
   1   1 -17 8221.94 1779.04  16
   1   1 -17 14629.6 3295.37  31
   1   1 -17 10248.0 2467.59  13
   1   1 -16 1177.12 697.362  14
   1  -1 -16 1909.28 1044.22  14
   1   1 -16 1266.41 778.135  13
   1  -1 -16 1515.36 1073.11  13
   1  -1 -16 1609.03 815.395  16
   1   1 -16 1149.87 825.853  31
   1   1 -16 1472.53 743.767  16
   1  -1 -15 4045.86 1453.15  16
   1   1 -15 5185.48 2031.23  31
   1   1 -15 5241.16 1779.34  13
   1   1 -15 4011.23 1417.54  14
   1  -1 -15 3365.30 1501.92  13
   1   1 -15 4255.13 1438.16  16
   1  -1 -15 5281.08 2127.78  31
   1   1 -14 4305.05 1333.19  14
   1  -1 -14 5001.50 1700.12  13
   1  -1 -14 3651.84 1316.05  16
   1   1 -14 3237.43 1238.38  13
   1   1 -14 4805.32 2001.69  31
   1   1 -14 3506.55 1240.66  16
   1  -1 -14 4426.45 2133.45  31
   1   1 -13 47586.9 6339.37  31
   1   1 -13 37084.7 4028.29  16
   1  -1 -13 47617.8 6558.51  31
   1   1 -13 42148.4 4527.12  13
   1  -1 -13 46417.9 4783.08  13
   1   1 -12-229.445 815.085  16
   1   1 -12-439.999 1041.74  38
   1  -1 -12 427.438 529.258  31
   1   1 -12 765.202 648.967  13
   1   1 -12 338.686 728.963  31
   1   1 -11 144341. 11047.8  38
   1  -1 -11 119746. 11990.0  33
   1  -1 -10 2476.09 1070.63  36
   1   1 -10 1270.67 934.002  36
   1   1 -10 1901.33 1056.22  38
   1  -1 -10 2184.61 1526.27  33
   1   1 -10 1044.81 840.024  37
   1   1  -9 121503. 9747.68  37
   1  -1  -9 135139. 10975.8  33
   1  -1  -9 217994. 9727.66  36
   1  -1  -9 183788. 10580.3  38
   1   1  -9 172003. 9842.22  38
   1   1  -9 140490. 8743.72  36
   1  -1  -8 484.396 549.627  36
   1  -1  -8 297.840 559.485  33
   1   1  -8 108.861 296.700  40
   1   1  -8-72.8500 420.055  37
  -1  -1   8 243.361 195.305   1
   1   1  -8 532.241 545.837  38
   1   1  -8 130.313 333.472  36
   1  -1  -8 396.084 552.161  38
   1   1  -7 65197.6 5137.78  38
   1  -1  -7 76098.7 5137.88  36
   1  -1  -7 43214.7 5355.82  33
   1   1  -7 39800.6 3068.48  40
  -1  -1   7 56859.4 2965.67   1
  -1   1   7 65509.8 3527.47   1
   1  -1  -7 45861.3 3526.54  40
   1   1  -7 33206.9 4364.07  37
   1  -1  -7 69934.3 5622.24  38
   1   1  -7 29656.8 3433.33  36
   1   1  -6 15905.4 3130.89  28
   1  -1  -6 24292.5 2306.46  40
   1  -1  -6 39731.7 3937.73  38
   1   1  -6 8846.15 1718.25  36
  -1  -1   6 28078.9 1867.78   1
  -1   1   6 34034.9 2404.21   1
   1  -1  -6 20873.8 3386.57  33
   1   1  -6 22527.1 2058.13  40
   1   1  -6 32949.8 3309.51  38
   1  -1  -6 40837.3 3328.37  36
  -1  -1   6 12657.2 2818.36  29
   1   1  -6 16015.1 2731.33  37
   1  -1  -5 17431.7 2843.86  33
  -1  -1   5 28886.0 1718.17   1
   1   1  -5 7349.05 1530.80  36
   1   1  -5 16433.5 814.471   2
   1   1  -5 22760.7 1845.28  40
   1   1  -5 10733.3 2230.31  28
   1   1  -5 29783.4 2858.24  38
  -1  -1   5 8998.41 2151.54  29
   1  -1  -5 28882.0 2279.40  40
   1  -1  -5 42373.6 3190.88  36
   1  -1  -5 38273.9 3628.34  38
   1   1  -4 23549.6 1629.51  40
   1   1  -4 16026.3 1940.60  36
  -1   1   4 20010.9 790.659   2
  -1  -1   4 22805.2 1343.18   1
   1   1  -4 9269.96 1887.01  28
   1   1  -4 19577.5 950.531   2
   1  -1  -4 33936.2 2445.50  36
   1  -1  -4 14364.7 2412.29  33
  -1   1   3 614915. 4634.62   2
   1   1  -3 552723. 9210.43  36
  -1  -1   3 543045. 5624.75   1
   1   1  -3 594151. 7012.07  40
   1  -1  -3 596238. 9036.26  36
   1  -1  -2 42.9740 215.657  33
  -1   1   2 662.497 154.772   2
   1   1  -2 604.497 175.913   2
   1   1  -2 84.4034 213.533  29
   1   1  -2 977.449 230.908  40
   1   1  -1 599949. 5029.22   2
  -1   1   1 657078. 5097.84   2
  -1   1   0 196916. 2941.07   2
   1   1   0 185304. 2770.64   2
   1   1   1 783533. 5662.10   2
  -1   1  -1 735435. 6051.91   2
  -1  -1  -1 692995. 16834.4  30
   1  -1   1 659130. 5242.87   1
  -1   1  -2 11847.3 821.674  40
  -1  -1  -2 10438.1 1698.61  33
   1   1   2 14928.3 802.022   2
   1  -1   2 12104.4 837.989   1
  -1   1  -2 12677.3 836.346   2
  -1   1  -3 247593. 8682.59  28
  -1   1  -3 387931. 7774.62  38
   1   1   3 375652. 4425.08   2
  -1   1  -3 254046. 8648.61  29
   1  -1   3 373508. 5506.86   1
  -1  -1  -3 309669. 9965.01  33
  -1   1  -3 314680. 5287.09  40
  -1   1  -3 354238. 8311.77  36
  -1   1  -3 330092. 4452.70   2
  -1   1  -4 1832.60 343.202   2
  -1   1  -4 3355.34 856.075  38
   1  -1   4 3846.91 637.713   1
  -1  -1  -4 4777.10 1064.99  36
   1  -1   4 1215.15 773.378  29
  -1   1  -4 1702.85 847.312  28
  -1  -1  -4 2769.83 1095.56  38
  -1  -1  -4 3124.83 1086.59  33
  -1   1  -4 1882.49 510.388  40
  -1   1  -4 1714.98 723.221  36
   1  -1   5 83471.0 6453.20  29
  -1  -1  -5 147122. 6547.15  38
  -1   1  -5 95980.8 3902.05  40
  -1   1  -5 78816.6 2191.67   2
  -1  -1  -5 141992. 6135.75  36
  -1   1  -5 122185. 5482.78  38
  -1  -1  -5 108650. 6921.43  33
  -1   1  -5 74560.3 4871.78  36
  -1   1  -5 91570.3 6525.65  28
   1  -1   5 121299. 3992.58   1
   1  -1   6 21350.1 1832.42   1
   1  -1   6 15996.8 3083.05  29
  -1   1  -6 16440.2 1791.64  40
  -1   1  -6 10814.2 2042.98  36
  -1   1  -6 16820.4 2645.62  37
  -1  -1  -6 27752.2 2991.24  36
  -1  -1  -6 28529.3 3107.37  38
  -1   1  -6 23639.0 2619.69  38
  -1   1  -6 19461.5 3251.10  28
  -1  -1  -6 21600.3 3318.75  33
  -1  -1  -7 50927.5 5620.89  33
   1   1   7 60966.6 4132.20   1
  -1  -1  -7 70397.2 5447.71  36
  -1   1  -7 39316.5 4529.24  37
   1  -1   7 54160.5 3232.47   1
  -1   1  -7 53246.4 4391.67  38
  -1  -1  -7 64287.2 5112.15  38
  -1   1  -8 479.726 500.346  36
   1   1   8 2483.48 866.016   1
  -1  -1  -8 2673.21 1238.05  36
  -1   1  -8 1835.68 1065.59  37
  -1   1  -8 1618.13 793.465  38
  -1  -1  -8 2434.42 1130.15  38
   1  -1   8 2479.33 735.676   1
  -1  -1  -8 2400.08 1264.93  33
  -1   1  -9 10212.5 2304.00  38
  -1   1  -9 5143.78 1850.77  36
  -1  -1  -9 14912.9 3035.01  36
   1  -1   9 9716.30 1595.52   1
  -1   1  -9 8409.08 2424.94  37
  -1  -1  -9 9065.43 2658.17  33
  -1  -1 -10 384.686 145.801  36
  -1   1 -10 526.006 134.082  38
  -1   1 -10-90.4209 279.464  36
  -1  -1 -10 447.442 117.405  33
  -1   1 -10 502.854 403.171  37
  -1  -1 -11 1252.04 1122.08  33
  -1   1 -11 3279.58 1443.18  38
  -1  -1 -11 2980.35 1295.89  36
  -1   1 -12 11674.3 2890.21  38
  -1  -1 -12 14192.9 3215.73  31
  -1  -1 -12 11939.7 2183.96  13
  -1   1 -12 16948.3 3202.41  31
  -1   1 -12 12007.9 2123.66  16
  -1   1 -12 13265.4 2322.43  13
  -1   1 -13 10518.4 2691.34  31
  -1   1 -13 7839.23 2013.60  13
  -1  -1 -13 8456.09 2077.45  13
  -1  -1 -13 8954.77 2613.93  31
  -1   1 -13 8244.68 1915.98  16
  -1   1 -14 245.715 145.309  13
  -1   1 -14-376.044 234.784  16
  -1  -1 -14 469.882 647.839  16
  -1  -1 -14 81.9588 247.105  13
  -1  -1 -14 239.246 425.855  31
  -1   1 -14 134.993 176.262  31
  -1   1 -15 24688.6 3393.68  16
  -1   1 -15 28182.7 4088.55  13
  -1   1 -15 27442.6 3801.75  14
  -1  -1 -15 27161.0 4657.93  31
  -1  -1 -15 25881.2 3505.56  16
  -1  -1 -15 27079.0 4033.02  13
  -1   1 -15 28914.2 4529.17  31
  -1   1 -16 2682.49 1497.01  31
  -1   1 -16 2705.72 1133.35  16
  -1  -1 -16 1664.29 615.351  14
  -1   1 -16 2191.59 804.420  14
  -1  -1 -16 2311.50 977.475  16
  -1   1 -16 1622.80 853.454  13
  -1   1 -17 4278.35 1651.79  31
  -1   1 -17 3543.22 1207.98  14
  -1  -1 -17 3951.04 1206.54  16
  -1   1 -17 3471.83 1383.26  13
  -1  -1 -17 3665.47 1359.00  14
  -1   1 -17 4611.08 1239.61  16
  -1   1 -18 2070.72 827.279  14
  -1   1 -18 2003.19 989.190  13
  -1  -1 -18 2607.34 1027.46  14
  -1  -1 -18 2810.45 869.648  16
   1  -3 -18-783.095 485.122  16
   1   3 -18 866.948 580.940  13
   1   3 -18 1065.16 784.130  15
   1   3 -18 685.140 722.904  31
   1  -3 -18 1066.31 685.418  14
   1  -3 -17 12898.8 2230.43  14
   1   3 -17 15481.3 3005.23  14
   1   3 -17 17595.6 3474.02  31
   1   3 -17 14611.2 2890.11  13
   1  -3 -17 9889.77 1922.04  16
   1   3 -17 13340.5 2669.21  15
   1  -3 -16 359.800 280.707  27
   1  -3 -16 636.610 698.928  16
   1   3 -16 486.136 459.188  13
   1   3 -16-146.279 600.959  14
   1   3 -16-227.682 390.965  31
   1   3 -15 1230.88 860.262  13
   1   3 -15 1917.45 1192.84  31
   1  -3 -15 1040.78 522.650  27
   1   3 -15 1951.92 1058.95  14
   1   3 -14 3540.49 1246.42  13
   1  -3 -14 4096.26 1147.40  27
   1   3 -14 3811.97 1661.35  31
   1   3 -14 4621.46 1519.42  14
   1   3 -14 2954.53 1181.32  16
   1   3 -13 26663.1 4620.75  31
   1  -3 -13 25487.7 2803.30  27
   1   3 -13 20028.4 3040.37  16
   1   3 -13 28954.1 3801.53  14
   1   3 -13 22819.0 3352.93  13
   1   3 -12 3594.93 1214.32  16
   1   3 -12 4154.04 1622.32  31
   1  -3 -12 3914.67 1056.70  27
   1   3 -12 4673.06 1382.09  14
   1   3 -12 3940.82 1244.98  13
   1   3 -11 70149.7 7570.41  38
   1   3 -11 42053.2 7162.45  37
   1  -3 -11 68297.4 10087.6  33
   1   3 -10 1449.01 1123.36  38
   1   3 -10 1057.04 828.542  37
   1  -3 -10-1591.12 1438.09  33
   1   3  -9 44562.3 5264.56  38
   1  -3  -9 35972.6 6779.90  33
   1   3  -9 22454.9 4092.42  36
   1   3  -9 41876.6 7129.55  28
   1   3  -9 36985.3 5939.88  37
   1   3  -8 416.384 679.314  36
   1   3  -8 1420.03 881.935  38
   1  -3  -8 174.930 251.305  33
   1   3  -8 866.356 846.204  28
  -1   3   8 928.966 499.195  35
   1   3  -7 55031.6 5777.94  36
   1   3  -7 49016.9 6875.98  28
  -1   3   7 56582.0 3446.41  35
   1   3  -7 70174.4 5920.86  38
   1  -3  -7 53117.7 7472.86  33
   1   3  -6 28398.4 3572.88  36
  -1   3   6 24609.2 2067.77  35
   1  -3  -6 22622.1 4593.26  33
   1   3  -6 30198.9 3705.50  38
   1   3  -6 19752.8 1760.52   2
   1   3  -6 20695.2 1877.31  40
   1  -3  -6 23070.7 4746.60  39
   1   3  -6 20085.5 4121.57  28
   1  -3  -5 72181.3 8196.24  39
  -1   3   5 60192.6 2625.00   2
   1  -3  -5 62769.0 7560.82  33
  -1   3   5 74144.0 3264.44  35
   1   3  -5 57808.5 2762.85  40
   1   3  -5 60217.5 3049.31   2
   1  -3  -4 12164.1 3173.54  33
   1   3  -4 13868.7 1155.13  40
  -1   3   4 17994.0 1464.33  35
   1   3  -4 13486.2 3153.59  29
   1  -3  -4 15941.1 3689.55  39
   1   3  -4 15198.9 1476.76   2
  -1   3   4 16330.9 1384.19   2
   1   3  -3 108272. 3869.97   2
  -1   3   3 128008. 3915.64   2
  -1   3   3 122594. 3539.98  35
   1  -3  -3 75656.0 9403.54  34
   1   3  -3 96459.8 2590.69  40
   1  -3  -3 83006.1 10214.9  30
  -1   3   2 9129.33 1052.53   2
   1   3  -2 7011.41 580.771  40
  -1   3   2 7736.38 812.660  35
   1   3  -2 7694.05 1011.13   2
   1  -3  -2 3333.33 2420.90  30
   1  -3  -2 3672.99 3184.79  34
   1   3  -1 296947. 6074.86   2
  -1   3   1 317015. 6270.62   2
  -1   3   0 895.916 354.913   2
   1   3   0 1173.32 364.472   2
  -1   3  -1 51536.1 2653.54   2
   1   3   1 55795.3 2598.57   2
  -1  -3  -2 85647.4 10026.9  34
   1   3   2 88336.2 3244.33   2
   1   3   2 87633.0 3100.40  35
  -1   3  -2 80727.4 3383.09   2
   1   3   3 3527.30 668.137  35
  -1  -3  -3 4059.77 1782.72  30
   1   3   3 3126.59 588.333   2
  -1   3  -3 3096.32 681.487   2
  -1  -3  -4 197740. 12670.7  39
   1   3   4 163208. 5008.76  35
  -1  -3  -4 176373. 12058.2  33
  -1   3  -4 195206. 11727.1  29
  -1   3  -4 132061. 4593.37   2
   1   3   4 137203. 3978.33   2
   1   3   5 64903.4 2843.82   2
  -1  -3  -5 91342.9 8660.30  39
   1   3   5 81493.0 3893.93  35
  -1   3  -5 60253.9 3201.85   2
  -1   3  -5 97644.0 5921.39  36
  -1  -3  -5 91709.1 8733.02  33
  -1  -3  -6 34088.9 5392.52  39
  -1   3  -6 36916.8 3801.23  38
  -1   3  -6 38611.2 5533.99  28
   1   3   6 31998.5 2664.75  35
  -1   3  -6 37246.1 4176.40  36
  -1  -3  -6 37988.3 5735.96  33
  -1   3  -6 26588.3 2175.18   2
  -1  -3  -7 44221.8 6472.62  33
   1   3   7 38847.6 3183.71  35
  -1   3  -7 42011.4 5107.00  36
  -1   3  -7 43692.6 4440.81  38
  -1   3  -7 47452.5 6460.53  28
   1   3   8 9023.91 1677.41  35
  -1   3  -8 10349.2 2217.83  38
  -1   3  -8 9280.01 2485.36  36
  -1   3  -8 10171.0 3104.52  28
  -1  -3  -8 10957.6 3363.02  33
  -1   3  -9 4846.48 2368.67  28
  -1  -3  -9 6603.87 2564.49  33
  -1   3  -9 4753.67 1962.70  37
  -1   3  -9 4597.75 1891.81  36
   1   3   9 4119.94 1236.83  35
  -1   3  -9 3991.24 1459.22  38
  -1   3 -10 149.177 518.455  36
  -1   3 -10 667.029 625.473  38
  -1  -3 -10 619.956 922.099  33
  -1   3 -10 845.738 791.832  37
  -1   3 -11 22256.3 3689.16  31
  -1  -3 -11 18153.8 2089.30  27
  -1  -3 -11 22341.7 4115.81  17
  -1   3 -11 15718.4 3213.01  38
  -1   3 -11 15669.7 2431.95  16
  -1   3 -11 16799.7 4383.12  37
  -1   3 -12-299.622 802.243  31
  -1   3 -12 743.960 653.166  14
  -1   3 -12-102.636 395.830  16
  -1   3 -12-7.01529 376.893  19
  -1  -3 -12 51.6409 199.455  27
  -1   3 -13 28024.0 3614.42  16
  -1   3 -13 40473.3 4535.18  14
  -1   3 -13 37115.7 5020.77  31
  -1   3 -13 31603.7 4080.74  13
  -1  -3 -13 38558.8 3474.25  27
  -1   3 -14 725.052 541.118  16
  -1   3 -14 1704.91 949.402  14
  -1  -3 -14 1214.62 593.013  27
  -1   3 -14 786.882 452.186  31
  -1   3 -14 1072.09 820.776  13
  -1   3 -15 10993.0 2574.21  13
  -1   3 -15 12281.3 2947.73  31
  -1   3 -15 11068.8 2646.98  14
  -1  -3 -15 12716.1 2142.44  27
  -1   3 -16 1474.85 924.063  13
  -1   3 -16 2170.98 1064.05  31
  -1  -3 -16 918.344 506.860  16
  -1  -3 -16 1340.97 586.764  27
  -1   3 -16 1887.94 937.078  14
  -1   3 -17 1298.45 778.435  14
  -1  -3 -17 1818.52 899.093  16
  -1   3 -17 1297.79 923.905  31
  -1  -3 -17 1647.54 892.465  14
  -1   3 -17 1475.58 860.216  13
  -1   3 -17 1446.58 674.456  15
  -1  -3 -18 1314.09 636.329  14
  -1   3 -18 628.278 548.392  13
  -1  -3 -18 453.676 74.9241  16
  -1   3 -18 1101.38 585.419  15
   1  -5 -17 4873.62 1090.25  14
   1  -5 -17 4582.11 1177.23  27
   1   5 -17 7153.00 1806.37  15
   1   5 -17 5971.86 1710.62  13
   1   5 -17 7097.57 1877.92  31
   1  -5 -17 2927.84 893.180  16
   1   5 -16 6416.47 2087.79  31
   1  -5 -16 4598.18 1196.89  14
   1  -5 -16 1643.74 783.295  16
   1   5 -16 4857.22 1574.01  13
   1   5 -16 4898.93 1592.23  15
   1  -5 -16 4072.84 1142.87  27
   1   5 -15 5110.37 2045.65  31
   1  -5 -15 4413.47 1172.33  27
   1   5 -15 4930.19 1454.40  13
   1   5 -15 4218.48 1610.65  15
   1   5 -14 9552.47 2344.51  15
   1   5 -14 9041.79 2080.65  13
   1  -5 -14 10918.6 1910.60  27
   1   5 -14 11043.7 2932.51  31
   1   5 -13 614.349 640.061  31
   1   5 -13-366.703 520.910  15
   1   5 -13 727.366 500.483  13
   1   5 -13 1178.39 751.665  14
   1  -5 -13 730.453 524.135  27
   1  -5 -12 351.066 812.111  17
   1   5 -12 507.246 660.015  14
   1  -5 -12-67.1970 221.459  27
   1   5 -12 46.5898 299.120  21
   1   5 -12 46.1083 281.610  13
   1  -5 -12 392.414 452.226  18
   1   5 -12-43.1642 335.256  15
   1   5 -12-359.728 798.485  31
   1  -5 -11 27157.2 3353.13  18
   1  -5 -11 31696.6 2953.71  27
   1   5 -11 31887.6 4157.59  15
   1   5 -11 31804.4 3770.64  21
   1   5 -11 37584.5 4426.98  14
   1  -5 -11 38910.9 6108.85  17
   1   5 -11 36486.3 5325.92  31
   1   5 -10 2810.78 1496.02  31
   1   5 -10 1940.04 792.170  21
   1   5 -10 2262.51 1370.94  38
   1   5 -10 2221.01 816.985  15
   1  -5 -10 2063.57 699.984  27
   1   5 -10 1871.33 876.500  14
   1  -5 -10 1183.46 485.809  18
   1   5  -9 100678. 12989.2  28
   1  -5  -9 74699.3 11409.9  33
   1   5  -9 108000. 9599.98  38
   1   5  -9 89887.0 10012.5  36
   1   5  -8 1896.65 1002.99  38
   1  -5  -8 2350.78 1860.54  33
   1   5  -8 1032.95 1209.27  28
   1   5  -8 707.977 616.617  36
   1  -5  -7 56649.7 9553.32  33
  -1   5   7 56398.0 3661.37  35
   1   5  -7 78206.1 7635.18  38
   1  -5  -7 53761.3 9188.06  39
   1   5  -7 82298.5 7827.15  36
   1   5  -6 280.273 90.0322   2
  -1   5   6 279.612 268.942  35
   1  -5  -6 1605.65 1484.76  33
   1  -5  -6-663.554 1857.29  39
  -1   5   5 5330.88 1071.28   2
   1   5  -5 5694.66 1247.48   2
  -1   5   5 6138.21 1058.56  35
   1  -5  -5 5836.81 3096.58  39
   1  -5  -5 4801.21 2521.01  33
  -1   5   4 8039.24 1323.73   2
   1   5  -4 8387.21 1484.30   2
  -1   5   4 8429.57 1160.92  35
   1   5  -3 68716.8 4196.19   2
  -1   5   3 67954.5 3921.08   2
  -1   5   3 72895.3 3347.91  35
  -1   5   2 12259.1 1663.51   2
  -1   5   2 12585.9 1365.88  35
   1   5  -2 12156.7 1692.04   2
  -1   5   1 42207.2 3145.00   2
   1   5  -1 43569.1 3223.80   2
  -1   5   0 41715.4 3140.49   2
   1   5   0 40904.3 3028.60   2
  -1   5  -1 24502.5 2488.13   2
   1   5   1 28512.8 2192.80  35
   1   5   1 23856.8 2323.67   2
  -1  -5  -1 22915.9 6949.17  34
   1   5   2 16718.4 1703.02  35
  -1  -5  -2 17536.9 6138.66  34
  -1   5  -2 15386.6 1971.73   2
   1   5   2 13903.6 1746.95   2
  -1   5  -3 4675.39 1113.42   2
   1   5   3 4993.21 949.504  35
   1   5   3 3724.50 880.248   2
  -1  -5  -3 7258.94 3585.55  34
  -1   5  -4 88523.9 5049.48   2
   1   5   4 84401.0 4264.98   2
  -1  -5  -5 110794. 12590.6  33
   1   5   5 69921.2 3862.86   2
  -1   5  -5 79381.2 4971.73   2
   1   5   5 92616.8 4681.83  35
  -1  -5  -5 114019. 12765.7  39
   1   5   6 56963.2 3839.49  35
  -1   5  -6 75518.1 6681.89  36
  -1   5  -6 47491.1 3976.78   2
  -1  -5  -6 59522.0 9170.60  39
  -1  -5  -6 59890.8 9240.44  33
  -1   5  -7 168694. 10403.1  38
  -1  -5  -7 161519. 15334.0  33
   1   5   7 141621. 6354.96  35
  -1  -5  -7 156817. 14915.3  39
  -1   5  -7 179577. 11537.4  36
  -1   5  -8 25498.4 6006.82  28
   1   5   8 18601.1 2437.14  35
  -1   5  -8 23802.9 3955.85  38
  -1  -5  -8 18725.2 5187.18  33
  -1   5  -8 23966.2 4749.82  36
  -1  -5  -9 64150.8 9887.88  33
  -1   5  -9 61813.7 8120.03  36
  -1   5  -9 66051.6 9958.91  28
  -1   5  -9 53497.2 6222.40  38
  -1  -5 -10 5180.38 1683.09  17
  -1  -5 -10 5004.72 1089.89  27
  -1   5 -10 7366.10 2219.77  31
  -1   5 -10 5051.32 1424.59  21
  -1  -5 -10 4675.02 1310.77  18
  -1  -5 -11 305.602 101.696  18
  -1   5 -11 717.121 654.634  15
  -1   5 -11 515.994 418.521  21
  -1  -5 -11-36.5578 1011.08  17
  -1   5 -11 634.279 609.778  31
  -1  -5 -11 614.230 399.923  27
  -1  -5 -12 273.657 472.394  18
  -1   5 -12 885.848 818.868  31
  -1  -5 -12 277.573 929.173  17
  -1   5 -12 87.7564 501.419  21
  -1  -5 -12 304.573 438.185  27
  -1   5 -12 447.878 642.862  15
  -1   5 -13 21294.2 3372.65  21
  -1   5 -13 20617.9 3474.44  15
  -1  -5 -13 23850.0 2739.83  27
  -1   5 -13 23723.9 3755.60  14
  -1   5 -13 20059.7 3263.13  13
  -1   5 -13 24922.1 4247.84  31
  -1  -5 -14 6167.50 1417.09  27
  -1   5 -14 6343.50 2071.92  31
  -1   5 -14 6504.21 1782.99  13
  -1   5 -14 6324.78 1935.21  15
  -1   5 -15 35327.0 4472.78  15
  -1   5 -15 33122.8 4261.34  13
  -1  -5 -15 38041.5 3557.74  27
  -1   5 -15 36299.5 4747.27  31
  -1   5 -16 11661.5 2429.82  13
  -1   5 -16 10464.5 2271.42  31
  -1   5 -16 11553.1 2308.06  15
  -1  -5 -16 7766.10 1822.66  16
  -1  -5 -16 9897.22 1729.38  27
  -1   5 -17 4240.20 1316.73  15
  -1   5 -17 3203.58 1023.19  31
  -1  -5 -17 2264.41 808.883  27
  -1   5 -17 2478.87 1088.65  13
  -1  -5 -17 2234.33 730.463  14
  -1  -5 -17 2234.23 771.054  16
   1  -7 -16 1277.56 578.222  27
   1   7 -16 1212.80 683.491  31
   1  -7 -16 121.791 97.1765  16
   1   7 -15 549.672 517.481  13
   1   7 -15 421.325 329.210  15
   1  -7 -15 130.904 270.679  27
   1   7 -15 101.412 175.897  31
   1  -7 -14 3446.55 1015.77  27
   1   7 -14 4609.65 1758.56  31
   1   7 -14 3446.49 1184.69  13
   1   7 -14 3480.66 1400.79  15
   1  -7 -13 7347.93 2643.17  17
   1   7 -13 3079.30 1080.82  13
   1  -7 -13 4215.30 1171.98  27
   1   7 -13 3950.70 1354.43  15
   1   7 -13 5317.87 1965.58  31
   1   7 -12 1369.24 798.716  15
   1  -7 -12 980.881 198.384  17
   1   7 -12 2278.10 1285.51  31
   1  -7 -12 980.985 404.286  18
   1  -7 -12 1457.58 621.265  27
   1   7 -12 1924.53 875.964  13
   1  -7 -11 18386.3 4341.94  17
   1   7 -11 15961.3 3798.96  31
   1  -7 -11 11451.2 2176.92  18
   1   7 -11 15380.2 3150.22  15
   1  -7 -11 13905.6 2048.88  27
   1   7 -10 7783.03 2226.56  15
   1   7 -10 9008.60 2812.62  31
   1  -7 -10 6362.70 1642.37  18
  -1  -7  10 7731.60 1758.65   9
   1  -7 -10 7073.90 1410.53  27
   1  -7 -10 5969.63 2523.09  17
   1  -7  -9 14725.1 1988.23  27
   1   7  -9 17726.4 4008.64  31
   1   7  -9 14731.6 2993.76  15
   1  -7  -9 18040.7 2081.57  11
   1  -7  -9 11586.5 2294.71  18
   1   7  -9 16899.7 2881.91  21
  -1  -7   9 14939.2 2408.54   9
   1   7  -8 3861.81 1314.76  21
  -1  -7   8 3857.32 1140.16   9
   1   7  -8 4161.30 1799.79  31
   1  -7  -8 3366.95 887.949  27
   1  -7  -8 4114.31 1047.47  11
   1   7  -8 3422.59 1450.64  15
   1   7  -7 573.167 362.956  36
   1   7  -7 1785.48 1267.83  31
   1   7  -7 864.710 370.309  15
   1  -7  -7 1285.82 559.715  27
  -1  -7   7 303.649 270.786   9
   1  -7  -7-551.001 2881.48  39
   1   7  -7 505.199 811.689  38
   1   7  -7 1189.30 662.598  21
   1  -7  -6 890.714 977.214  39
   1  -7  -6 1934.34 2085.59  33
   1   7  -6 2813.95 1204.13   2
  -1   7   5 38597.7 3186.66  35
   1  -7  -5 35455.0 9359.89  39
   1   7  -5 40865.3 4313.49   2
   1  -7  -5 31418.0 8417.60  33
   1   7  -4 6648.03 1652.20   2
  -1   7   4 6356.89 1470.63   2
  -1   7   3 36178.2 3661.27   2
   1   7  -3 35171.0 3818.96   2
   1   7  -2 1219.46 586.361   2
   1  -7  -2 3.72453 1179.04  34
  -1   7   2 1795.55 774.987   2
  -1   7   1 27758.2 3271.42   2
   1   7  -1 25965.4 3125.13   2
   1  -7   0 319.995 2586.86  34
   1   7   0 357.305 353.459   2
  -1   7   0 711.077 576.821   2
  -1  -7   0 707.385 1195.86  34
  -1  -7  -1 3416.37 2520.17  34
  -1   7  -1 2557.92 993.206   2
   1   7   1 2990.40 1082.65   2
   1   7   2 5210.82 1323.48   2
  -1  -7  -2 1926.84 1439.22  34
  -1   7  -2 5122.02 1476.21   2
  -1  -7  -3 4621.25 2630.91  34
   1   7   3 5263.27 1326.80   2
  -1   7  -3 6644.77 1630.29   2
   1   7   4 19454.7 2536.26   2
  -1   7  -4 21747.6 3212.81   2
   1   7   4 23556.7 2610.43  35
  -1   7  -5 37083.7 4288.16   2
  -1  -7  -5 37948.9 8875.90  39
  -1  -7  -5 38502.6 8603.27  33
   1   7   5 35731.1 3274.01  35
  -1   7  -6 20188.8 3178.76   2
   1   7   6 17937.5 2386.32  35
  -1  -7  -6 20505.6 6613.28  33
  -1   7  -6 32676.7 5247.97  36
  -1  -7  -6 21029.1 6406.21  39
   1  -7   7 15483.3 2348.45   9
  -1  -7  -7 19431.4 2103.90  27
  -1   7  -7 21900.9 3007.05  21
  -1   7  -7 15557.9 3822.35  38
  -1   7  -7 22616.0 4737.09  36
  -1   7  -7 20551.7 3334.39  15
  -1   7  -7 29441.8 4741.62  31
  -1  -7  -7 21534.1 6328.69  39
  -1   7  -8 21252.9 3952.82  31
  -1  -7  -8 16991.2 2035.94  27
  -1   7  -8 15842.8 3018.97  15
   1  -7   8 16987.5 2516.74   9
  -1   7  -8 16751.0 2736.12  21
  -1   7  -9 869.811 204.944  15
  -1   7  -9 1294.07 934.538  31
  -1  -7  -9 1359.57 779.730  18
  -1  -7  -9 1065.31 536.884  27
  -1   7  -9 1466.40 875.566  21
   1  -7   9 1087.23 597.761   9
  -1  -7 -10 1262.23 605.803  27
   1  -7  10 1148.38 625.937   9
  -1   7 -10 327.887 203.511  21
  -1   7 -10 2174.56 1342.43  31
  -1   7 -10 1405.10 1147.02  15
  -1  -7 -10 637.628 567.305  18
  -1  -7 -10 1276.84 906.169  17
  -1   7 -11 3912.36 1189.56  13
  -1  -7 -11 3751.32 1046.34  27
  -1   7 -11 3329.34 1352.87  15
  -1   7 -11 3926.05 1738.62  31
  -1  -7 -11 2191.03 887.718  18
  -1  -7 -11 3599.72 1693.14  17
  -1   7 -11 4247.21 1562.19  21
  -1  -7 -12 6362.23 1389.22  27
  -1   7 -12 5738.47 1507.40  13
  -1   7 -12 6110.82 1885.54  15
  -1  -7 -12 4678.04 1362.18  18
  -1  -7 -12 6057.99 2112.14  17
  -1   7 -12 7495.35 2323.43  31
  -1   7 -13 11156.8 2141.33  13
  -1  -7 -13 15710.1 2205.95  27
  -1   7 -13 15015.3 3100.75  31
  -1   7 -13 14598.9 2789.03  15
  -1  -7 -14 4076.26 1117.96  27
  -1   7 -14 4467.10 1396.03  15
  -1   7 -14 3775.72 1408.76  31
  -1   7 -14 3485.18 1168.09  13
  -1   7 -15 5321.63 1632.51  31
  -1   7 -15 4862.55 1382.50  13
  -1   7 -15 5322.61 1584.75  15
  -1  -7 -15 4934.02 1222.36  27
  -1  -7 -16 2025.33 703.035  27
   1   9 -14 544.316 493.049  31
   1  -9 -14 111.051 124.397  27
   1  -9 -13 276.177 256.671  27
   1   9 -13 40.6660 372.012  31
   1  -9 -12-42.0973 121.533  27
   1   9 -12 110.788 65.4305  31
   1  -9 -11 2053.03 791.204  27
   1  -9 -11 698.749 269.557  18
   1   9 -11 2888.17 1567.31  31
   1  -9 -11 1949.24 1569.19  17
  -1  -9  11 2072.36 948.494   9
  -1  -9  10 11065.3 2224.08   9
   1  -9 -10 11154.5 1819.95  27
   1  -9 -10 9075.07 2946.12  17
   1   9 -10 12000.5 3106.60  31
   1  -9 -10 5153.12 1302.09  18
  -1  -9   9 3630.96 1175.67   9
   1  -9  -9 3807.94 1004.40  11
   1   9  -9 3889.63 1807.53  31
   1  -9  -9 3919.03 1060.48  27
   1  -9  -9 1937.54 832.579  18
   1  -9  -8 4025.13 1041.14  11
   1   9  -8 3498.82 1863.34  31
   1  -9  -8 3665.80 996.371  27
  -1  -9   8 4019.25 1350.28   9
  -1  -9   7 13380.3 2387.81   9
   1  -9  -7 14595.1 2466.88  25
   1   9  -7 16401.0 3995.40  31
   1  -9  -7 15247.2 2109.34  11
   1  -9  -6 266.261 384.499  25
   1   9  -6 287.433 366.930  31
  -1  -9   6 23.3603 200.464   9
   1  -9  -6 105.934 269.779  11
   1  -9  -5 2297.92 950.067  25
  -1  -9   5 2750.23 1039.57   9
   1   9  -5 2966.44 1776.39  31
   1  -9  -5 3827.79 1123.22  11
   1  -9  -5 2985.94 1881.77   3
  -1  -9   4 12793.8 2255.60   9
   1  -9  -4 7929.58 3566.11   3
   1   9  -4 15034.4 3904.31  31
   1  -9  -4 17564.3 2540.06  11
   1  -9  -4 12708.5 2083.99  25
   1  -9  -3 8068.93 1667.54  25
  -1  -9   3 9186.29 1849.19   9
   1  -9  -3 12444.9 2287.20  11
   1   9  -3 8615.27 3054.26  31
   1  -9  -2 19058.9 2741.13  11
  -1  -9   2 18060.8 2616.46   9
   1  -9  -2 14518.1 2171.39  25
   1  -9  -1 9204.10 2039.94  11
   1  -9  -1 8670.01 1834.59   9
  -1  -9   1 7730.58 1522.13  25
  -1  -9   1 8362.57 1793.45   9
  -1  -9   0 6331.32 1377.94  25
   1  -9   0 6580.03 1452.35  24
   1  -9   0 7449.21 1708.49   9
  -1  -9   0 6997.47 1658.42   9
   1  -9   1 7749.40 1703.19   9
   1  -9   1 7424.26 1565.79  24
  -1  -9  -1 7165.43 1677.38   9
  -1  -9  -1 4877.06 1245.34  25
   1  -9   2 893.848 384.703   9
  -1  -9  -2 863.754 586.797  25
  -1  -9  -2-968.730 2807.19   3
  -1  -9  -2 1255.96 725.371  11
   1  -9   3 1181.47 696.969   9
  -1  -9  -3 1232.54 656.673   3
  -1   9  -3 1571.90 1083.85  31
  -1  -9  -3 1853.34 786.291  11
  -1  -9  -3 1220.17 639.894  25
   1  -9   4 7967.73 1790.39   9
  -1   9  -4 9951.18 3106.15  31
  -1  -9  -4 6921.02 1557.64  25
  -1  -9  -4 10218.1 1803.06  11
  -1  -9  -4 5943.29 2454.42   3
  -1   9  -5 8837.88 2957.98  31
  -1  -9  -5 7926.08 1717.31  25
   1  -9   5 8153.45 1828.77   9
  -1  -9  -5 6734.59 2652.64   3
  -1  -9  -5 10801.3 1774.26  11
   1  -9   6 5153.09 1493.88   9
  -1  -9  -6 5570.83 1458.44  25
  -1   9  -6 5273.47 2070.49  31
  -1  -9  -6 5272.75 1196.75  11
  -1  -9  -7 48168.2 4475.01  25
  -1   9  -7 58552.6 7025.86  31
  -1  -9  -7 58655.8 3896.99  11
   1  -9   7 50800.7 4920.81   9
  -1  -9  -7 51441.1 4570.10  26
   1  -9   8 25601.0 3472.17   9
  -1   9  -8 30253.0 4855.93  31
  -1  -9  -8 26477.8 2511.03  11
  -1   9  -9 27632.4 4579.46  31
  -1  -9  -9 14849.5 2325.44  18
  -1  -9  -9 22162.9 4687.79  17
   1  -9   9 26511.0 3508.10   9
  -1  -9  -9 29711.9 2919.32  27
  -1  -9 -10-346.638 562.831  17
  -1  -9 -10 2.31960 509.668  18
   1  -9  10 393.911 387.277   9
  -1  -9 -10 604.515 412.529  27
  -1   9 -10 905.373 650.500  31
  -1   9 -11 642.783 701.874  31
  -1  -9 -11 202.509 180.453  18
   1  -9  11 163.738 292.983   9
  -1  -9 -11 419.767 389.541  27
  -1  -9 -11-440.840 1011.64  17
  -1  -9 -12 827.090 122.461  17
  -1   9 -12 1578.96 898.781  31
  -1  -9 -12 1133.07 516.815  27
  -1   9 -13 961.237 617.018  31
  -1  -9 -13 1448.50 583.654  27
  -1  -9 -14 3715.58 868.625  27
   1 -11 -11-381.102 784.247  17
   1  11 -11 419.524 365.928  31
   1 -11 -10 2443.29 1263.64  17
   1 -11 -10 1706.69 508.514  18
   1 -11  -9-237.598 269.115  18
   1 -11  -9 713.017 348.917  17
   1  11  -9 803.893 610.974  31
   1 -11  -8 1276.43 675.764  17
   1  11  -8 2569.42 1231.68  31
   1 -11  -8 642.519 422.047  18
  -1 -11   7 2545.79 1078.30   9
   1 -11  -7 160.987 181.330  18
   1  11  -7 1786.48 1063.18  31
   1 -11  -7 1939.51 866.591  26
  -1 -11   6 310.766 453.855   9
   1  11  -6 438.739 946.134  31
   1 -11  -6 373.911 309.003  25
   1 -11  -6 622.560 379.152  26
   1 -11  -5 3970.01 1275.19  25
  -1 -11   5 3501.63 1269.52   9
   1  11  -5 2852.65 1543.30  31
   1 -11  -4 4143.12 1273.15  25
   1 -11  -4 1.60801 698.385   3
  -1 -11   4 4860.43 1508.20   9
   1  11  -4 3059.66 1612.73  31
   1 -11  -3 390.378 1203.27   3
   1  11  -3 6035.14 2279.99  31
  -1 -11   3 5956.58 1492.61  25
   1 -11  -3 6133.30 1571.17  25
  -1 -11   2 15521.1 2473.57  25
   1 -11  -2 15208.9 2468.07  25
   1  11  -2 11498.2 3472.62  31
   1 -11  -1 2515.03 977.877  25
   1  11  -1 2565.23 1892.74  31
   1 -11  -1-28.3250 1020.53   3
  -1 -11   1 2259.09 953.300  25
  -1 -11   0 5680.28 1502.00   6
  -1 -11   0 5732.32 1486.65  25
  -1 -11   0 1232.98 376.584   3
   1 -11   0 1353.02 1315.44   3
   1 -11   0 5289.87 1465.83  25
  -1 -11  -1 517.453 329.852  25
  -1 -11  -1 858.674 500.863   6
  -1 -11  -1-1385.50 2344.23   3
  -1  11  -1 933.953 1038.81  31
   1 -11   1 762.334 599.767  25
   1 -11   2 637.100 629.985   9
  -1 -11  -2-148.874 488.583  25
  -1 -11  -2-732.936 1575.89   3
  -1  11  -2 131.495 268.283  31
   1 -11   2-62.8028 477.044  25
  -1 -11  -3 14117.3 2397.70  25
  -1 -11  -3 6167.23 2611.56   3
  -1  11  -3 11387.5 3101.78  31
   1 -11   3 16866.0 2856.71   9
   1 -11   3 12354.2 2168.64  25
  -1 -11  -4-695.054 1234.04   3
   1 -11   4 1844.93 784.170  25
  -1 -11  -4 1844.19 879.502  25
  -1  11  -4 1699.72 1214.27  31
   1 -11   4 2203.86 1000.05   9
   1 -11   5 15357.3 2755.47   9
  -1  11  -5 11651.5 3041.08  31
  -1 -11  -5 13657.3 2346.67  25
  -1 -11  -6 6718.97 1550.54  26
  -1 -11  -6 7710.85 1771.04  25
  -1  11  -6 8095.19 2398.09  31
   1 -11   6 10374.5 2219.21   9
  -1 -11  -7 3975.21 1200.01  26
   1 -11   7 5034.84 1547.09   9
  -1  11  -7 4359.86 1580.47  31
  -1 -11  -7 1561.80 591.345  18
  -1  11  -8 5338.04 1748.16  31
  -1 -11  -8 2734.53 1278.46  17
   1 -11   8 7316.04 1785.50   9
  -1 -11  -8 1474.43 363.712  18
  -1 -11  -9 167.294 348.117  17
  -1 -11  -9 222.877 120.526  18
  -1 -11 -10-62.0536 93.0585  18
  -1  11 -10-194.097 416.224  31
  -1 -11 -10 132.264 569.656  17
   1  13  -5 159.084 187.132  31
  -1 -13   5 257.344 365.442   6
  -1  13   5-84.5830 174.533  31
  -1 -13   5-138.866 998.538   3
   1 -13  -4 1679.65 683.937  26
  -1 -13   4 1609.21 714.494   6
   1  13  -4 787.447 427.967  31
  -1 -13   4 79.0505 466.867   3
  -1  13   4-54.6665 131.378  31
   1 -13  -3 273.411 236.535  26
  -1  13   3 61.1017 357.113  31
   1  13  -3 571.713 497.670  31
  -1 -13   3-622.889 855.246   3
  -1 -13   3 159.250 273.870   6
   1  13  -2 1037.36 664.629  31
   1 -13  -2 3908.07 1071.62  25
  -1 -13   2 263.132 1127.00   3
  -1 -13   2 3673.47 1010.37   6
  -1  13   2 655.417 676.000  31
   1  13  -1 281.086 146.957  31
   1 -13  -1-486.776 383.152   3
  -1 -13   1 1556.83 662.286  25
  -1 -13   1 1438.88 684.691   6
   1 -13  -1 1763.47 796.547  25
  -1 -13   1-11.9345 110.975   3
  -1  13   1-256.181 417.207  31
   1 -13   0 2241.17 814.681  25
  -1  13   0 150.353 278.919  31
  -1 -13   0 2745.84 995.595  25
  -1 -13   0 301.898 497.654   3
   1 -13   0-881.257 918.806   3
   1  13   0 1279.35 857.487  31
  -1  13  -1-110.157 47.0438  31
   1 -13   1 665.706 543.265  25
   1  13   1 216.277 441.535  31
   1 -13   1 1655.12 1637.28   3
  -1 -13  -1 1125.91 1201.92   3
  -1 -13  -2 337.259 358.167  26
   1 -13   2-229.951 278.829  25
   1 -13   2-58.2191 277.237   6
  -1  13  -2 139.886 131.038  31
   1 -13   2-475.295 948.722   3
   1  13   2 565.387 666.708  31
   1 -13   3 1728.80 688.508   6
   1  13   3 554.087 499.043  31
  -1  13  -3 583.331 506.052  31
   1 -13   3 2465.36 1006.75   3
  -1 -13  -3 1451.35 627.575  26
  -1 -13  -4-58.6106 238.894  18
   1 -13   4-440.095 1202.92   3
   1  13   4-346.709 300.100  31
  -1  13  -4 668.126 592.668  31
  -1 -13  -4 623.268 391.889  26
   1 -13   4 487.495 315.713   6
  -1  13  -5 679.281 448.235  31
   1  13   5 442.017 416.315  31
   1 -13   5 591.726 806.346   3
   2   0 -19 149.953 117.834  14
   2   0 -18 14842.9 2648.10  14
   2   0 -18 15490.1 3119.57  13
   2   0 -18 12713.4 2193.86  16
   2   0 -17-508.804 754.792  14
   2   0 -17-704.074 593.587  13
   2   0 -17 329.699 444.703  16
   2   0 -16 2357.56 1074.78  14
   2   0 -16 1853.11 1134.20  13
   2   0 -16 2098.81 987.597  16
   2   0 -16 2130.84 1311.47  31
   2   0 -15 737.581 815.613  14
   2   0 -15-77.0375 149.295  13
   2   0 -15 68.7399 391.107  16
   2   0 -15-985.679 848.678  31
   2   0 -14 4563.17 1384.87  16
   2   0 -14 4530.22 1492.65  13
   2   0 -14 6107.65 2226.48  31
   2   0 -13-635.715 949.508  31
   2   0 -13 91.5320 429.282  13
   2   0 -13-59.7113 438.580  16
   2   0 -12 132135. 11142.7  38
   2   0 -12 139947. 10320.2  31
   2   0 -12 159458. 7717.16  16
   2   0 -11-429.244 704.125  38
   2   0 -10 39851.9 5349.82  38
   2   0  -9 458.695 461.694  36
   2   0  -9 61.7391 112.630  40
   2   0  -9 726.707 1005.49  33
   2   0  -9-14.4534 266.154  38
   2   0  -8 450.899 614.762  38
   2   0  -8 296.283 613.039  37
   2   0  -8 90.0591 395.731  33
   2   0  -8 290.111 420.206  36
   2   0  -8 19.7936 105.288  40
   2   0  -7 380.145 711.013  33
   2   0  -7 367.382 351.537  36
  -2   0   7 32.6682 132.200   1
   2   0  -7 212.229 312.983  37
   2   0  -7 676.690 582.700  38
   2   0  -7 204.294 358.638  40
   2   0  -6 1020.01 709.341  37
   2   0  -6 4068.49 1017.46  36
   2   0  -6 4394.18 937.056  40
   2   0  -6 6534.43 1539.36  38
  -2   0   6 1046.66 876.459  29
   2   0  -6 2311.74 1095.01  33
  -2   0   6 9278.03 945.500   1
   2   0  -5 317.602 358.251  38
  -2   0   5 285.965 145.820   1
   2   0  -5 286.987 208.783  40
   2   0  -5 80.9628 176.554  36
   2   0  -5 133.506 368.838  33
   2   0  -4 56692.4 2864.48  36
  -2   0   4 52436.5 1447.92  41
  -2   0   3 28.4694 13.0551   1
   2   0  -3-124.927 199.291  33
  -2   0   3 77.6322 63.0814  41
   2   0  -3 96.1155 84.1953  36
  -2   0   2 7439.13 382.301   1
   2   0  -2 2921.46 827.815  28
  -2   0   2 2594.47 398.196  41
   2   0  -2 6100.04 886.029  33
   2   0  -1 107.528 58.7422  33
   2   0  -1 29.1939 57.7963  28
  -2   0  -1-12.0143 64.0944  33
  -2   0  -1 21.7405 23.5118  28
  -2   0  -2 13411.4 1268.89  37
  -2   0  -2 15583.2 1434.44  33
  -2   0  -2 24560.0 1512.59  38
  -2   0  -2 24421.3 909.780  41
   2   0   3 265.520 237.391  29
  -2   0  -3 120.455 258.489  37
  -2   0  -3 7.69956 80.5480  38
  -2   0  -3 77.2496 196.602  33
   2   0   4 187325. 7951.12  29
   2   0   4 292747. 6945.57   1
  -2   0  -4 306457. 7594.29  38
  -2   0  -4 168093. 6534.06  37
  -2   0  -4 213209. 7669.10  33
  -2   0  -5 162.102 364.352  37
   2   0   5-1.72266 256.122  29
  -2   0  -5 5.48219 192.509  36
  -2   0  -5 190.646 30.4717  33
   2   0   5 10.3292 94.0156   1
  -2   0  -5-5.69174 174.857  38
   2   0   6 38713.1 4561.03  29
  -2   0  -6 96278.9 5367.49  38
  -2   0  -6 71289.1 5538.59  33
  -2   0  -6 61511.1 4933.25  37
  -2   0  -6 40800.0 4021.48  36
   2   0   6 92842.2 4551.87   1
  -2   0  -7 300.337 447.686  36
  -2   0  -7-133.890 437.337  33
  -2   0  -7 325.334 365.290  37
   2   0   7-12.5503 312.522   1
  -2   0  -7-29.4824 265.459  38
  -2   0  -8 2771.32 1129.68  38
  -2   0  -8 2032.21 1007.47  37
   2   0   8 2131.54 744.793   1
  -2   0  -8 1213.79 732.924  36
  -2   0  -8 998.307 614.430  33
  -2   0  -9 75.0294 352.815  36
  -2   0  -9 221.886 291.715  38
  -2   0 -10 65427.7 7093.30  36
  -2   0 -10 75908.2 6441.03  38
  -2   0 -11-291.675 487.287  36
  -2   0 -12 41101.0 5048.87  31
  -2   0 -12 37150.2 4003.28  13
  -2   0 -13-1.15831 321.419  16
  -2   0 -13-117.807 486.066  13
  -2   0 -13 353.137 415.664  31
  -2   0 -14 1346.33 965.982  31
  -2   0 -14 1345.75 861.199  13
  -2   0 -14 1239.97 721.022  16
  -2   0 -15-301.969 920.126  31
  -2   0 -15 264.866 429.306  16
  -2   0 -15 369.503 610.713  13
  -2   0 -16 22145.2 3762.10  31
  -2   0 -16 20363.0 3225.96  14
  -2   0 -16 23692.5 3212.92  16
  -2   0 -16 17340.1 3144.40  13
  -2   0 -17 105.671 430.767  14
  -2   0 -17 132.053 518.138  13
  -2   0 -17 60.3549 398.786  16
  -2   0 -18-28.4788 436.957  14
  -2   0 -18-57.8507 399.240  16
   2   2 -18 15867.2 3129.56  31
   2   2 -18 12945.9 2620.80  14
   2   2 -18 11097.1 2328.62  15
   2  -2 -18 8596.17 1733.24  16
   2   2 -18 11262.1 2680.66  13
   2  -2 -18 11994.6 2180.37  14
   2   2 -17-404.251 584.359  14
   2   2 -17 842.501 686.014  13
   2  -2 -17 118.676 346.244  14
   2  -2 -17 758.090 430.185  16
   2   2 -16-402.873 162.822  31
   2   2 -16-307.072 708.016  16
   2  -2 -16 107.502 237.158  14
   2  -2 -16 56.1742 271.227  16
   2   2 -16 46.8956 336.479  13
   2   2 -16-214.265 396.771  14
   2   2 -15 2529.08 1710.59  31
   2   2 -15 1632.35 990.209  16
   2  -2 -15 1113.31 783.684  16
   2   2 -15 1701.61 964.344  13
   2   2 -15 2039.07 1032.66  14
   2  -2 -14 22927.0 4940.61  31
   2   2 -14 25285.9 4843.60  31
   2   2 -14 21132.2 3136.65  16
   2   2 -14 24791.3 3465.76  14
   2   2 -14 21394.9 3397.26  13
   2  -2 -13 2097.09 764.598  27
   2  -2 -13 852.899 487.935  31
   2   2 -13 1732.74 865.334  13
   2   2 -13 1830.52 806.118  31
   2   2 -13 1316.43 565.773  14
   2   2 -13 1591.90 778.469  16
   2  -2 -12 163347. 11818.2  31
   2   2 -12 164120. 11148.6  31
   2   2 -12 166772. 8036.72  16
   2   2 -12 147322. 7844.57  13
   2  -2 -12 164637. 6562.51  27
   2  -2 -11-141.201 841.169  33
   2   2 -11 213.283 816.195  37
   2   2 -11 503.631 706.196  38
   2  -2 -10 106821. 11385.6  33
   2   2 -10 102763. 10233.9  37
   2   2  -9-10.3189 781.796  37
   2   2  -9 385.494 288.486  36
   2   2  -9 97.5547 190.806  40
   2   2  -9 0.81892 240.447  38
   2  -2  -9 1002.70 809.262  33
   2   2  -8 3556.97 1898.55  28
   2   2  -8 5254.38 1590.06  38
   2   2  -8 3024.27 1228.98  36
   2  -2  -8 3792.15 1763.54  33
   2   2  -8 3668.41 1664.21  37
   2   2  -8 4204.77 1043.80  40
   2   2  -7 515.678 538.427  36
   2   2  -7 201.814 1003.57  28
   2   2  -7 1663.15 873.626  38
   2   2  -7 1515.74 611.662  40
   2  -2  -7 1048.33 523.415  40
   2  -2  -7 394.190 566.238  33
   2   2  -6 7741.02 2323.63  28
   2  -2  -6 13278.0 3113.81  33
   2  -2  -6 18660.8 2148.81  40
   2   2  -6 16273.4 1715.69  40
   2   2  -6 23011.2 3021.78  38
   2   2  -6 14317.9 2422.14  36
   2   2  -5 2518.83 993.966  38
   2  -2  -5 813.577 1015.60  39
   2  -2  -5 1953.49 628.278  40
   2   2  -5 634.549 617.691  28
   2   2  -5 810.332 633.959  29
   2  -2  -5 1148.15 966.869  33
   2   2  -5 2716.61 931.858  36
  -2   2   5 295.393 226.794  30
  -2   2   5 2020.88 372.040   2
   2   2  -5 2001.84 529.680  40
   2   2  -5 1795.94 410.957   2
  -2   2   4 300757. 5390.85  35
   2   2  -4 289911. 5249.63   2
   2   2  -4 302636. 5893.79  40
  -2   2   4 302505. 4819.31   2
   2   2  -3 1505.10 780.844  29
   2   2  -3 3678.23 587.362  40
   2  -2  -3 4099.89 718.464  40
  -2   2   3 4821.86 589.401  35
   2   2  -3 3326.06 552.559   2
  -2   2   3 4783.20 647.022   2
   2  -2  -3 2374.84 1278.03  33
   2  -2  -2 305565. 15429.4  34
  -2   2   2 576569. 6858.80   2
  -2   2   2 451626. 4921.83  35
   2  -2  -2 343161. 17138.0  30
   2   2  -2 503774. 6640.03   2
   2  -2  -2 503947. 6805.67  40
   2   2  -1 134144. 3343.59   2
  -2   2   1 156916. 3696.23   2
   2  -2  -1 91624.7 9758.64  34
  -2   2   1 115569. 2245.15  35
   2  -2  -1 117233. 2628.59  40
  -2   2   0 121339. 3350.21   2
   2   2   0 115297. 3088.15   2
  -2  -2  -1 235079. 15185.8  30
  -2   2  -1 227067. 4761.69   2
   2   2   1 226987. 4248.14   2
  -2  -2  -2 564860. 18917.7  34
   2   2   2 521838. 6463.42   2
   2   2   3 25247.0 4814.50  30
   2  -2   3 30401.4 1842.87   1
  -2   2  -3 28633.3 1793.75   2
  -2  -2  -3 36962.9 4323.95  33
   2   2   3 38022.4 1778.69   2
  -2  -2  -3 39906.9 4412.97  39
  -2   2  -3 29408.9 3550.25  29
  -2   2  -4 129244. 3966.50   2
   2   2   4 176936. 4109.98   2
  -2   2  -4 154743. 8572.50  29
   2  -2   4 176568. 4898.42   1
  -2  -2  -4 186863. 9952.38  39
  -2   2  -4 176718. 6286.96  38
  -2  -2  -4 219536. 7203.15  36
   2   2   4 155947. 11371.5  30
  -2  -2  -4 194598. 10207.9  33
  -2   2  -4 181046. 7111.15  36
  -2   2  -5 6386.88 1810.02  28
  -2   2  -5 7421.46 1989.11  29
   2   2   5 7695.83 2596.72  30
   2  -2   5 9525.94 1263.24   1
  -2   2  -5 5525.53 1425.96  36
  -2  -2  -5 8155.75 2143.55  39
  -2  -2  -5 8239.12 2105.41  33
  -2   2  -5 5017.98 802.654   2
   2   2   5 6659.26 885.329   2
  -2  -2  -5 10140.7 1751.86  36
  -2   2  -5 7189.07 1378.97  38
  -2   2  -6 99931.7 6758.18  36
  -2  -2  -6 124922. 8926.74  33
  -2   2  -6 129187. 6316.38  38
  -2   2  -6 121861. 8507.97  28
   2  -2   6 121289. 4799.78   1
   2  -2   7 3139.79 818.668   1
  -2  -2  -7 5539.58 1930.89  33
  -2  -2  -7 4393.79 1499.64  36
  -2   2  -7 1903.59 963.281  36
  -2   2  -7 2534.07 929.200  38
  -2   2  -7 1722.53 920.252  37
  -2   2  -7 2206.30 1202.48  28
  -2  -2  -8 396.062 506.433  36
  -2   2  -8 160.123 735.346  28
  -2   2  -8 590.011 573.006  38
   2  -2   8-38.2600 178.998   1
  -2   2  -8 33.3892 487.028  37
  -2   2  -8 29.1187 226.053  36
  -2  -2  -8 654.360 690.619  33
  -2   2  -9 423.814 150.745  36
  -2  -2  -9 978.181 755.902  36
  -2  -2  -9 969.468 1077.50  33
  -2   2  -9 779.080 515.259  38
  -2   2  -9 606.202 438.620  37
  -2  -2 -10 81641.3 9057.14  33
  -2   2 -10 81236.5 8276.98  37
  -2   2 -10 86644.9 6991.65  38
  -2   2 -11 891.854 69.7292  38
  -2   2 -11 1509.96 1104.56  37
  -2  -2 -12 139021. 10222.4  31
  -2  -2 -12 129398. 5974.72  27
  -2   2 -12 131214. 8939.16  31
  -2   2 -12 126337. 7123.57  19
  -2   2 -13 4279.72 1470.18  14
  -2   2 -13 4088.99 1338.97  16
  -2  -2 -13 5833.34 1325.59  27
  -2  -2 -13 4265.19 1824.99  31
  -2   2 -13 4904.83 1700.51  31
  -2   2 -13 3512.65 1124.86  13
  -2   2 -13 3984.16 1239.98  19
  -2   2 -14 31084.8 4473.14  31
  -2  -2 -14 34832.4 3446.36  27
  -2   2 -14 25489.9 3666.77  14
  -2   2 -14 27069.3 3589.70  16
  -2   2 -14 29060.7 4017.32  13
  -2   2 -15-5.05335 277.822  14
  -2  -2 -15-132.308 393.945  16
  -2   2 -15 352.536 246.754  16
  -2   2 -15 69.3053 540.488  31
  -2   2 -15 340.636 414.842  13
  -2   2 -16 2165.34 1141.39  13
  -2   2 -16 1905.31 1203.52  14
  -2   2 -16 2196.11 765.693  16
  -2  -2 -16 2518.03 1109.00  16
  -2   2 -16 2737.01 1095.81  31
  -2   2 -17-351.553 449.665  14
  -2   2 -17 259.998 434.795  13
  -2  -2 -17 433.620 430.092  16
  -2  -2 -17-117.619 566.280  14
  -2   2 -17 99.2185 240.422  31
  -2   2 -18 3807.68 1228.18  14
  -2  -2 -18 3274.12 1004.06  16
  -2  -2 -18 2050.61 780.753  14
  -2   2 -18 4040.19 1350.91  13
  -2   2 -18 4026.43 1175.92  15
   2   4 -18 3550.94 1324.16  13
   2  -4 -18 1542.64 565.112  16
   2   4 -18 3583.83 1382.85  31
   2   4 -18 2496.44 1086.40  15
   2   4 -17 881.598 655.812  31
   2  -4 -17 124.745 247.166  16
   2  -4 -17 415.167 334.051  14
   2  -4 -17 358.632 507.922  27
   2   4 -17-54.6570 453.896  15
   2   4 -17 301.735 671.360  13
   2  -4 -16 713.722 361.326  16
   2   4 -16 17.1925 543.323  13
   2  -4 -16-22.3950 584.479  27
   2   4 -16 301.552 259.826  15
   2   4 -16 574.976 523.797  31
   2  -4 -15 478.766 332.569  27
   2   4 -15 1268.31 771.767  15
   2   4 -15 694.230 361.115  31
   2   4 -15 1141.46 762.905  14
   2   4 -15 214.364 355.076  13
   2   4 -14 2825.50 1131.15  13
   2   4 -14 3277.67 1319.74  14
   2   4 -14 3398.65 1728.70  31
   2  -4 -14 3084.20 1047.00  27
   2   4 -13 15030.9 3603.81  31
   2   4 -13 12431.9 2416.80  13
   2  -4 -13 11897.0 1939.02  27
   2   4 -13 16437.1 3021.78  14
   2   4 -12 15930.8 2575.65  13
   2   4 -12 17694.0 3788.60  31
   2   4 -12 20038.2 3048.98  14
   2  -4 -12 21670.2 4625.31  17
   2  -4 -12 16369.9 2150.05  27
   2   4 -11 4176.36 1204.61  16
   2  -4 -11 4442.37 1643.58  17
   2   4 -11 6526.74 1657.98  14
   2  -4 -11 4251.48 1017.97  27
   2  -4 -11 5470.17 1415.01  18
   2   4 -11 5366.11 2093.58  31
   2   4 -11 4951.65 1309.54  21
   2  -4 -10 37347.2 7779.88  33
   2   4 -10 56367.4 6905.55  38
   2   4 -10 52286.1 9245.76  28
   2   4 -10 29336.6 6179.64  37
   2   4  -9 11579.0 4176.31  28
   2  -4  -9 9451.05 3782.89  33
   2   4  -9 14279.6 3299.09  38
   2   4  -8 169.775 185.678  36
   2   4  -8-154.563 1385.10  28
   2   4  -8 820.965 770.932  38
   2   4  -7 89732.4 10641.2  28
   2   4  -7 138450. 9480.36  36
   2  -4  -7 85747.9 10762.6  39
   2  -4  -7 84189.9 10621.9  33
   2   4  -7 135298. 9499.99  38
  -2   4   7 111203. 4599.26  35
  -2   4   6 11545.3 1401.15  35
   2   4  -6 17665.8 2967.33  36
   2  -4  -6 8307.36 3428.77  39
   2   4  -6 10105.9 1483.71   2
   2  -4  -6 8487.08 3398.59  33
  -2   4   5 67896.1 3148.99  35
   2   4  -5 56605.3 3454.94   2
   2  -4  -5 54277.3 8435.27  39
  -2   4   5 57625.9 3156.02   2
   2   4  -4 161929. 5648.42   2
  -2   4   4 160048. 5278.14   2
  -2   4   3 2645.43 690.538   2
   2  -4  -3 2181.50 2540.54  34
   2   4  -3 2263.50 715.322   2
  -2   4   3 2611.54 571.390  35
  -2   4   2 29567.8 2300.83   2
   2   4  -2 28684.1 2299.35   2
  -2   4   2 25632.3 1635.79  35
  -2   4   1 35208.7 2514.68   2
   2   4  -1 35839.3 2485.92   2
   2   4   0 1217.60 499.704   2
  -2   4   0 1020.51 460.465   2
   2   4   0 1507.25 502.033  35
   2   4   1 2808.80 691.747  35
   2   4   1 3135.07 779.812   2
  -2   4  -1 2399.10 755.670   2
  -2  -4  -1 2195.18 2181.68  34
   2   4   2 68863.3 3335.05   2
  -2   4  -2 68717.7 3752.68   2
   2   4   3 54475.0 3034.31  35
   2   4   3 43165.5 2633.68   2
  -2   4  -3 43635.3 3061.02   2
  -2  -4  -3 59048.8 8902.66  34
   2   4   4 89453.6 3777.13   2
  -2   4  -4 93804.6 4632.56   2
   2   4   5 18017.3 1978.51  35
  -2  -4  -5 20050.6 4504.73  39
  -2  -4  -5 20386.5 4673.38  33
   2   4   5 14597.9 1572.25   2
  -2   4  -5 13240.0 1784.56   2
   2   4   6 59521.5 3913.91  35
  -2   4  -6 69095.9 5562.08  38
  -2  -4  -6 69704.7 8574.14  33
  -2   4  -6 48909.9 3586.92   2
  -2  -4  -6 70095.9 8535.85  39
  -2   4  -6 72548.7 6146.94  36
  -2  -4  -7 6831.38 2605.03  33
  -2  -4  -7 6037.60 2423.06  39
  -2   4  -7 6751.78 1789.86  38
   2   4   7 5097.85 1204.91  35
  -2   4  -7 7204.42 2164.70  36
  -2   4  -7 7472.52 2725.65  28
  -2   4  -8 39018.7 6510.98  28
  -2  -4  -8 37850.7 6669.67  33
   2   4   8 33394.6 3326.56  35
  -2   4  -8 34192.4 5206.77  36
  -2   4  -8 34339.5 4288.88  38
  -2   4  -9 2054.11 1419.95  37
  -2   4  -9 1878.50 1296.86  36
  -2   4  -9 1792.17 1087.87  38
  -2  -4  -9 788.170 875.737  33
   2   4   9 849.348 608.405  35
  -2   4  -9 1674.17 1206.14  28
  -2   4 -10 2010.99 833.593  38
  -2   4 -10 1875.12 1165.38  37
  -2   4 -10 3267.79 2096.11  28
  -2   4 -10 5144.11 2269.38  36
  -2  -4 -10 1898.75 1504.04  33
  -2  -4 -11-991.994 1494.28  17
  -2   4 -11 702.730 597.857  16
  -2  -4 -11 132.345 314.338  18
  -2   4 -11 613.724 425.358  19
  -2   4 -11 73.0792 557.479  31
  -2   4 -11-47.4452 345.179  21
  -2   4 -11 152.814 356.606  14
  -2  -4 -11 166.557 164.230  27
  -2   4 -12 33914.5 3965.73  21
  -2  -4 -12 38974.6 3363.40  27
  -2   4 -12 40619.5 4458.15  14
  -2   4 -12 39812.1 5083.27  31
  -2   4 -12 30827.7 3705.04  16
  -2   4 -13 381.391 389.764  13
  -2  -4 -13 1011.67 499.539  27
  -2   4 -13 1463.36 989.685  31
  -2   4 -13 1778.41 954.997  14
  -2   4 -14 22293.7 3685.27  31
  -2   4 -14 22184.0 3494.02  13
  -2  -4 -14 24214.9 2848.84  27
  -2   4 -14 22065.5 3442.64  14
  -2  -4 -15-283.615 438.958  27
  -2   4 -15 171.492 360.492  31
  -2   4 -15-809.752 752.359  14
  -2   4 -15-213.955 61.5665  13
  -2   4 -15 42.0631 294.635  15
  -2  -4 -16 1902.71 770.930  27
  -2  -4 -16 1984.59 799.677  16
  -2   4 -16 1826.20 829.219  15
  -2   4 -16 2135.99 942.714  31
  -2   4 -16 2403.17 1171.89  13
  -2   4 -17-369.763 612.951  15
  -2   4 -17-342.865 305.110  31
  -2  -4 -17 288.988 63.8429  14
  -2  -4 -17-480.705 476.641  27
  -2   4 -17 223.652 600.195  13
  -2  -4 -17-441.206 493.370  16
   2   6 -17 560.312 249.135  15
   2   6 -17-126.942 523.913  13
   2   6 -17 510.794 802.969  31
   2   6 -16 498.811 819.100  15
   2  -6 -16 210.867 475.704  16
   2   6 -16 789.784 640.330  13
   2  -6 -16 495.905 393.268  27
   2   6 -16 656.808 833.356  31
   2   6 -15-461.178 955.986  31
   2  -6 -15-146.278 63.0764  27
   2   6 -15 523.757 640.021  15
   2   6 -15-584.924 417.398  13
   2   6 -14 11125.4 2531.59  15
   2  -6 -14 12151.8 2027.40  27
   2   6 -14 13562.7 3224.71  31
   2   6 -14 11341.4 2362.99  13
   2  -6 -13 1800.00 735.149  27
   2   6 -13 1940.75 1132.12  31
   2   6 -13 1547.91 644.688  13
   2   6 -13 897.362 799.688  15
   2  -6 -13-94.5437 1267.38  17
   2  -6 -12 20044.3 4729.29  17
   2   6 -12 20229.1 3472.54  15
   2  -6 -12 17660.9 2388.02  27
   2  -6 -12 16942.4 2608.78  18
   2   6 -12 21385.4 4462.06  31
   2   6 -12 15685.7 2616.71  13
   2  -6 -11 2364.12 1008.32  18
   2   6 -11 2290.32 1159.98  31
   2   6 -11 2986.80 1414.03  15
   2  -6 -11 1071.15 318.073  17
   2   6 -11 2844.52 1007.61  13
   2  -6 -11 2274.82 740.237  27
   2   6 -10 28614.0 4945.35  31
   2  -6 -10 23305.9 3141.17  18
   2  -6 -10 26180.5 5392.49  17
   2   6 -10 25604.5 3438.01  21
   2  -6 -10 23755.6 2526.40  27
   2   6 -10 29044.3 3999.00  15
   2  -6  -9 910.130 410.947  11
   2   6  -9 738.890 860.083  31
   2   6  -9 1081.19 725.378  15
   2   6  -9 411.217 402.780  21
   2  -6  -9 997.475 709.588  18
   2  -6  -9 153.960 60.4479  27
   2  -6  -8 423.816 233.206  33
   2   6  -8-1758.83 1855.59  28
   2   6  -8 1442.08 1238.49  36
   2   6  -8-387.763 614.922  38
   2  -6  -8-1833.50 1910.00  39
   2   6  -7 15972.2 4041.86  38
   2  -6  -7 9929.68 4282.86  39
   2   6  -7 17600.1 3916.26  36
   2  -6  -7 8803.15 4169.20  33
   2   6  -6 82607.7 5574.53   2
  -2   6   6 84178.8 4218.37  35
   2  -6  -6 62255.4 11436.1  33
   2  -6  -6 75809.9 12421.4  39
   2  -6  -5 32475.8 8327.66  39
  -2   6   5 40534.5 2843.20  35
  -2   6   5 40331.9 3421.04   2
   2   6  -5 41358.6 3806.44   2
  -2   6   4 113737. 5865.61   2
   2   6  -4 109742. 6079.86   2
  -2   6   4 109503. 4624.79  35
  -2   6   3 61299.4 4320.84   2
   2   6  -3 57218.8 4250.35   2
   2   6  -2 6264.51 1357.15   2
  -2   6   2 7221.94 1456.88   2
   2  -6  -1 873.366 988.834  34
   2   6  -1 415.834 471.544   2
  -2   6   1 496.471 382.486   2
   2   6   0 863.382 470.081   2
  -2   6   0 1061.33 613.574   2
  -2   6  -1 74.1865 221.350   2
   2   6   1 123.596 160.973   2
   2   6   2 14729.6 1860.12  35
  -2   6  -2 12077.8 2026.78   2
   2   6   2 12056.4 1824.89   2
  -2  -6  -2 14247.8 5542.92  34
  -2  -6  -3 27162.5 7343.68  34
   2   6   3 22046.0 2299.18  35
   2   6   3 19232.0 2258.63   2
  -2   6  -3 21158.7 2767.62   2
   2   6   4 60102.4 3989.20   2
  -2   6  -4 71489.6 5263.15   2
   2   6   4 73969.2 4327.76  35
  -2  -6  -5-473.941 1555.55  33
   2   6   5 443.899 254.329   2
  -2   6  -5 772.786 561.591   2
  -2  -6  -5 814.362 1320.54  39
   2   6   5 734.804 415.771  35
  -2  -6  -6 70435.1 10619.9  33
  -2   6  -6 54103.9 4851.02   2
  -2   6  -6 75292.3 7228.53  36
  -2  -6  -6 69575.7 10518.2  39
   2   6   6 58101.0 4168.32  35
  -2   6  -7 13240.5 3269.08  36
  -2   6  -7 12510.2 2928.49  38
   2   6   7 8957.61 1700.99  35
  -2  -6  -7 9478.67 3704.69  39
  -2  -6  -7 8389.64 3822.64  33
  -2  -6  -8-419.738 2096.21  33
   2   6   8 799.625 369.089  35
  -2   6  -8 939.845 1614.51  28
  -2   6  -8 1334.67 818.276  36
  -2   6  -8 607.271 410.582  21
  -2  -6  -9 24186.6 4520.57  17
  -2  -6  -9 17286.5 2056.05  27
  -2   6  -9 18583.7 3498.17  31
  -2   6  -9 16121.0 2976.87  15
   2  -6   9 16601.7 2438.20   9
  -2   6  -9 17471.0 2757.86  21
  -2  -6  -9 20733.8 2979.73  18
  -2  -6 -10 11288.9 2149.29  18
  -2  -6 -10 12838.6 3338.75  17
  -2   6 -10 10634.4 2260.56  21
  -2   6 -10 10809.8 2483.14  15
  -2  -6 -10 10651.1 1673.42  27
  -2   6 -10 12612.6 2885.50  31
  -2  -6 -11 581.499 427.835  27
  -2   6 -11 1498.81 1128.59  15
  -2  -6 -11 179.551 186.212  18
  -2   6 -11-109.452 674.446  31
  -2   6 -11 331.656 493.029  21
  -2  -6 -11 1283.60 896.390  17
  -2  -6 -12 36913.7 3336.57  27
  -2   6 -12 34718.6 4408.20  21
  -2   6 -12 33417.9 4441.57  15
  -2   6 -12 36213.0 4882.44  31
  -2  -6 -12 32210.7 3627.63  18
  -2  -6 -12 35976.3 5341.67  17
  -2   6 -13 3306.07 1456.99  15
  -2   6 -13 2966.62 1340.79  31
  -2   6 -13 3226.56 1243.60  13
  -2  -6 -13 3107.05 982.997  27
  -2   6 -14 19402.6 3000.25  13
  -2   6 -14 25428.7 3723.19  15
  -2  -6 -14 25751.4 2835.59  27
  -2   6 -14 21164.6 3477.53  31
  -2   6 -15-363.194 777.227  31
  -2  -6 -15 531.759 389.638  27
  -2   6 -15 397.637 29.4416  15
  -2   6 -15 863.059 639.298  13
  -2   6 -16 49.3132 320.979  15
  -2  -6 -16 559.302 374.836  27
  -2  -6 -16 112.642 209.230  14
  -2   6 -16 595.277 587.345  31
  -2   6 -16-31.1838 474.369  13
  -2  -6 -16 123.152 263.766  16
   2  -8 -15 590.959 379.482  27
   2   8 -15-354.303 645.219  31
   2   8 -14 5946.12 2005.85  31
   2  -8 -14 3553.64 1014.99  27
   2   8 -13 3285.85 1549.83  31
   2   8 -13 2640.40 1121.09  15
   2  -8 -13 2372.85 1297.54  17
   2  -8 -13 2978.63 890.756  27
   2  -8 -12 3238.54 1039.48  18
   2  -8 -12 4972.34 1259.49  27
   2  -8 -12 4910.83 2105.33  17
   2   8 -12 4706.09 1685.19  15
   2   8 -12 6504.75 2340.91  31
   2   8 -11 14905.3 3697.86  31
   2  -8 -11 11785.7 1895.90  27
   2  -8 -11 8640.53 1751.85  18
   2  -8 -11 11307.5 3475.03  17
   2   8 -11 13463.4 2915.51  15
   2  -8 -10 1995.52 909.344  18
   2  -8 -10 3016.00 916.565  27
   2   8 -10 3845.06 1872.49  31
   2   8 -10 2379.28 1294.21  15
   2  -8 -10 3991.59 980.860  11
   2  -8 -10 1797.69 790.943  17
  -2  -8  10 2996.07 1123.35   9
   2  -8  -9 2858.19 896.531  27
   2  -8  -9 3084.82 910.211  11
   2   8  -9 2710.13 1251.51  15
  -2  -8   9 3365.40 1189.69   9
   2   8  -9 2960.65 1582.27  31
   2  -8  -9 2615.77 1064.58  18
   2  -8  -8 344.458 338.806  27
  -2  -8   8 24.3174 203.255   9
   2  -8  -8 14.1119 111.344  11
   2   8  -8-151.883 764.665  15
   2   8  -8-10.3026 851.278  31
  -2  -8   7 15916.8 2488.32   9
   2   8  -7 17327.1 3294.70  15
   2   8  -7 16178.6 4032.88  31
   2  -8  -7 14980.8 1926.36  27
   2  -8  -7 23387.3 2630.80  11
   2  -8  -7 14351.7 2282.72  25
   2  -8  -6 3179.87 1905.69   3
   2   8  -6 6275.76 2531.27  31
  -2  -8   6 4084.84 1194.41   9
   2  -8  -6 3999.08 1165.64  25
   2  -8  -6 6413.96 1556.89  11
   2  -8  -5 72463.4 4739.70  25
   2   8  -5 81959.4 9078.17  31
  -2  -8   5 82361.3 5404.22   9
  -2  -8   4 56555.7 4392.96   9
   2  -8  -4 29747.9 6978.37   3
   2   8  -4 41803.6 4582.56   2
   2   8  -4 57901.4 7684.59  31
   2  -8  -4 71485.0 4953.33  11
  -2   8   4 37101.4 4110.83   2
  -2   8   3 48936.2 4787.43   2
   2   8  -3 49101.8 4896.96   2
  -2   8   2 43460.0 4572.12   2
   2   8  -2 43468.7 4522.85   2
   2  -8  -1 4524.23 3204.65  34
  -2  -8   1 2394.78 1026.01  34
   2   8  -1 5069.64 1495.52   2
  -2   8   1 5001.29 1509.35   2
  -2  -8   0 5096.46 3678.59  34
   2  -8   0 5920.13 3422.97  34
  -2   8   0 11182.8 2334.97   2
   2   8   0 10703.3 2135.27   2
  -2  -8  -1 6101.97 3307.68  34
   2   8   1 6434.66 1670.74   2
  -2   8  -1 7584.19 1990.40   2
   2  -8   1 1397.40 2878.22  34
   2   8   2 1420.42 760.159   2
  -2   8  -2 1866.01 951.095   2
  -2  -8  -2 2567.39 3220.19  34
   2   8   3 6734.91 1620.91   2
  -2   8  -3 7377.74 1922.61   2
   2   8   4 37447.5 3911.09   2
   2  -8   4 57880.9 4577.07   9
  -2  -8  -4 42434.1 7796.78   3
  -2  -8  -4 76477.7 4506.16  11
  -2  -8  -4 58375.2 4171.41  25
  -2   8  -4 77072.4 8077.45  31
   2  -8   5 51244.0 4384.66   9
  -2   8  -5 52554.4 4725.25  21
  -2  -8  -5 54802.0 3756.27  11
  -2  -8  -5 55949.7 8446.99   3
  -2  -8  -5 50780.0 4041.81  25
  -2   8  -5 62231.8 7172.28  31
  -2  -8  -6 12034.6 1706.11  11
  -2   8  -6 10231.2 2175.97  21
  -2  -8  -6 9529.45 1817.48  25
  -2   8  -6 11501.2 3000.33  31
   2  -8   6 9241.92 1895.66   9
   2  -8   7 12480.4 2294.00   9
  -2  -8  -7 11522.9 2067.95  25
  -2   8  -7 11390.7 2666.69  15
  -2  -8  -7 14273.3 1775.51  11
  -2  -8  -7 12415.9 1745.23  27
  -2   8  -7 13082.2 2500.15  21
  -2  -8  -7 11241.2 2020.43  26
  -2   8  -7 13839.3 3238.31  31
  -2   8  -8 3309.61 1358.32  21
  -2   8  -8 5417.13 1989.83  31
   2  -8   8 4199.13 1314.79   9
  -2  -8  -8 4838.73 1135.75  27
  -2   8  -8 5292.90 1943.01  15
   2  -8   9 235.862 167.664   9
  -2   8  -9 931.921 692.876  15
  -2   8  -9 270.263 390.457  21
  -2  -8  -9 274.336 155.010  18
  -2  -8  -9 544.341 305.912  27
  -2   8  -9 177.103 493.662  31
  -2  -8 -10 397.530 607.323  17
   2  -8  10 20.6267 88.6824   9
  -2   8 -10 127.918 314.337  15
  -2  -8 -10 186.067 194.681  18
  -2  -8 -10 328.077 332.791  27
  -2   8 -10 546.602 574.858  31
  -2   8 -11 9341.52 2371.31  15
  -2  -8 -11 7321.66 2256.55  17
   2  -8  11 7212.19 1760.86   9
  -2  -8 -11 9126.94 1613.99  27
  -2   8 -11 8844.70 2372.71  31
  -2  -8 -11 6571.04 1479.38  18
  -2  -8 -12 3984.75 1108.06  18
  -2  -8 -12 4367.74 1622.14  17
  -2   8 -12 3851.15 1373.13  31
  -2  -8 -12 4096.18 1129.45  27
  -2   8 -12 5698.62 1801.66  15
  -2  -8 -13 5806.00 1310.02  27
  -2   8 -13 6355.71 1752.97  31
  -2  -8 -14 2904.78 914.768  27
  -2   8 -14 3224.87 1104.12  31
  -2  -8 -15 81.8542 129.072  27
   2  10 -12 3029.74 1218.54  31
   2 -10 -12 309.250 347.722  17
   2 -10 -12 3921.10 977.767  27
   2 -10 -11 1727.69 662.299  27
   2 -10 -11 764.813 432.219  18
   2  10 -11 1393.73 995.596  31
   2 -10 -11 1356.96 735.481  17
   2  10 -10-204.400 416.300  31
   2 -10 -10 72.8484 238.410  27
   2 -10 -10 61.4073 291.763  17
   2 -10 -10 196.982 366.125  18
   2 -10 -10 462.233 328.174  11
  -2 -10  10 54.7061 224.936   9
  -2 -10   9 1315.17 827.672   9
   2 -10  -9 362.594 226.742  11
   2 -10  -9-971.152 1393.19  17
   2 -10  -9 132.010 297.903  18
   2  10  -9 664.361 711.189  31
   2 -10  -8 1348.96 475.567  11
   2 -10  -8 642.200 452.107  18
   2 -10  -8 1376.97 803.162  25
   2  10  -8 2908.72 1545.17  31
  -2 -10   8 1762.05 837.762   9
   2 -10  -7 583.541 639.190  11
   2  10  -7 836.838 673.523  31
  -2 -10   7 486.999 328.181   9
   2 -10  -7 320.608 362.259  25
   2 -10  -6 2404.63 848.491  11
  -2 -10   6 2401.24 1018.16   9
   2 -10  -6 2164.86 933.481  25
   2  10  -6 2751.86 1839.06  31
  -2 -10   5 3901.25 1342.72   9
   2 -10  -5 2849.01 1095.94  25
   2 -10  -5 3290.54 1082.83  11
   2  10  -5 3033.14 1580.26  31
   2 -10  -5 555.556 391.255   3
  -2 -10   4 7458.95 1844.71   9
   2 -10  -4 3185.60 2814.20   3
   2 -10  -4 7299.27 1726.59  11
   2 -10  -4 6006.15 1536.29  25
   2  10  -4 7401.76 2814.55  31
   2 -10  -3 3252.70 1037.74  25
  -2 -10   3 3598.00 1118.40  25
   2 -10  -3 759.472 1143.04   3
   2  10  -3 4494.17 2181.07  31
  -2 -10   3 3504.03 1251.07   9
   2 -10  -3 3270.30 1144.48  11
   2 -10  -2 19364.2 2746.07  25
  -2 -10   2 18850.0 2565.36  25
  -2 -10   2 24307.7 3348.28   9
   2 -10  -1 747.555 494.696  25
  -2 -10   1 814.371 486.446  25
   2 -10  -1 1785.59 1213.82   3
  -2 -10   1 1159.46 600.560   9
  -2 -10   0 10091.3 1891.26  25
   2 -10   0 9285.56 1821.65  25
   2 -10   0 12455.5 2348.74   9
  -2 -10  -1 958.908 604.662  25
  -2 -10  -1-241.144 1690.69   3
   2 -10   1 19.9996 472.522   9
  -2 -10  -1 1043.76 571.158   6
  -2 -10  -2 146.146 141.951  25
  -2 -10  -2 1054.61 877.643   3
   2 -10   2-228.719 687.095   9
  -2  10  -3 104.906 867.666  31
   2 -10   3 143.462 510.224   9
  -2 -10  -3 1712.35 1828.42   3
  -2  10  -4 18222.1 3834.11  31
   2 -10   4 16054.1 2731.50   9
  -2 -10  -4 8507.44 2776.95   3
   2 -10   4 14686.8 2282.67  25
  -2 -10  -4 15540.0 2487.17  25
  -2 -10  -5 7830.90 1754.35  25
   2 -10   5 9270.79 2097.87   9
  -2  10  -5 7768.49 2371.09  31
  -2 -10  -6 6319.59 1512.60  26
  -2 -10  -6 6099.32 1604.69  25
   2 -10   6 6735.34 1791.29   9
  -2  10  -6 6491.57 2230.83  31
  -2 -10  -7 1706.48 859.985  26
   2 -10   7 2195.88 1051.93   9
  -2  10  -7 871.444 272.778  31
  -2 -10  -8 256.747 164.753  18
  -2 -10  -8 1456.13 878.865  26
  -2  10  -8 1320.31 979.891  31
  -2  10  -9 907.318 679.605  31
  -2 -10  -9 587.858 727.529  17
  -2 -10  -9 960.847 340.387  18
   2 -10   9 1046.67 818.987   9
  -2  10 -10 1174.53 796.318  31
  -2 -10 -10 514.608 459.868  17
  -2 -10 -10 252.026 80.1712  18
   2 -10  10 1274.52 774.892   9
  -2 -10 -11 1396.39 532.531  18
   2 -10  11 2619.14 1031.41   9
  -2 -10 -11 2846.71 818.186  27
  -2  10 -11 1808.54 777.400  31
  -2 -10 -11 1246.07 880.698  17
  -2  10 -12 3577.84 1094.65  31
  -2 -10 -12 2698.26 749.920  27
   2 -12  -9 753.780 666.223  17
   2  12  -9 1378.59 698.741  31
   2  12  -8 1305.93 681.778  31
   2 -12  -8 286.464 324.660  17
  -2 -12   7-226.042 300.966   6
   2 -12  -7-41.1348 313.395  17
   2  12  -7 155.721 202.429  31
  -2 -12   6 6065.92 1396.88   6
   2 -12  -6 2807.82 686.685  18
   2  12  -6 4501.02 1603.66  31
   2 -12  -6 6445.39 1470.60  26
  -2 -12   5 3569.81 1062.52   6
   2 -12  -5 3612.93 1098.30  26
   2  12  -5 2408.55 1228.40  31
   2 -12  -5 3529.21 1115.15  25
  -2 -12   4 11041.2 1964.65   6
   2 -12  -4 13012.6 2230.02  25
   2  12  -4 8519.40 2452.06  31
   2 -12  -3 10426.9 1976.41  25
  -2 -12   3 9593.60 1844.86   6
   2  12  -3 5688.70 2082.65  31
  -2 -12   3 10398.0 1923.42  25
  -2 -12   2 5632.52 1433.00  25
   2 -12  -2 282.545 1272.88   3
   2 -12  -2 6011.53 1532.74  25
   2  12  -2 4340.22 2032.40  31
  -2 -12   2 5863.04 1464.25   6
  -2 -12   2-542.486 1809.19   3
  -2  12   1 1762.93 1201.02  31
  -2 -12   1 3453.63 1141.05   6
  -2 -12   1 3379.94 1106.84  25
   2  12  -1 1848.06 1090.25  31
   2 -12  -1 2737.66 1055.88  25
  -2 -12   1 950.265 1351.04   3
   2 -12  -1 1380.89 1002.44   3
  -2 -12   0 1116.71 692.312   6
   2 -12   0 398.719 321.879  25
  -2 -12   0 414.293 451.973  25
  -2  12   0-15.1224 422.360  31
   2 -12   0 893.320 1518.76   3
   2  12   0-94.9702 766.377  31
  -2 -12   0 1889.71 1895.74   3
   2  12   1 556.618 646.796  31
  -2 -12  -1 1182.56 1560.88   3
   2 -12   1 1476.17 782.584  25
  -2  12  -1 1179.94 871.411  31
  -2 -12  -1 2039.84 837.171  25
   2 -12   1-706.471 1538.17   3
   2 -12   1 1483.12 644.595   6
   2 -12   2 1872.92 1851.32   3
   2 -12   2 4451.82 1279.41  25
  -2 -12  -2 3669.63 1184.61  25
  -2  12  -2 2218.77 1276.48  31
  -2 -12  -2 936.169 952.815   3
   2 -12   2 4251.81 1324.78   6
   2 -12   3 1792.17 1424.32   3
   2 -12   3 11617.8 2043.66  25
  -2  12  -3 5818.14 2089.75  31
  -2 -12  -3 13049.9 2221.07  25
  -2 -12  -4 11282.0 1948.80  26
  -2  12  -4 9864.89 2411.28  31
  -2  12  -5 5561.06 1761.24  31
  -2 -12  -5 7740.95 1585.39  26
  -2 -12  -6 1342.32 498.186  18
  -2  12  -6 4122.00 1353.75  31
  -2 -12  -6 3767.61 1093.59  26
  -2 -12  -7 194.136 220.064  18
  -2 -12  -7-188.735 308.549  17
  -2 -12  -7 921.340 528.280  26
  -2  12  -7 619.838 613.417  31
  -2  12  -8-29.2119 195.550  31
  -2 -12  -8-193.621 483.919  17
   2 -12   8-94.9447 352.187   6
  -2 -12  -8 286.530 257.841  18
   3  -1 -19 12645.2 2139.09  14
   3   1 -19 10085.7 2058.47  15
   3   1 -18 341.107 304.807  14
   3  -1 -18 1208.81 866.388  14
   3  -1 -18 734.501 518.994  16
   3   1 -18 610.049 521.495  13
   3   1 -17-606.440 721.861  31
   3  -1 -17-510.223 533.377  14
   3   1 -17 79.8774 271.000  16
   3   1 -17 508.163 388.168  13
   3  -1 -17 554.978 393.198  13
   3  -1 -17-304.115 544.064  16
   3   1 -17 155.474 252.734  14
   3  -1 -16 619.322 126.692  16
   3  -1 -16 652.043 465.133  13
   3   1 -16 1734.25 1014.22  31
   3  -1 -16 952.621 497.228  14
   3   1 -16 1895.73 1012.14  13
   3   1 -16 296.708 284.023  16
   3   1 -16 1224.95 847.872  14
   3  -1 -15 53843.5 5830.72  13
   3   1 -15 51805.3 7366.10  31
   3   1 -15 54717.3 5226.08  16
   3  -1 -15 51759.1 5043.59  16
   3   1 -15 57704.3 5481.40  14
   3  -1 -15 48617.0 7213.46  31
   3   1 -15 50420.8 5534.99  13
   3   1 -14 3016.62 1488.11  31
   3  -1 -14 2452.16 892.426  16
   3   1 -14 3426.52 1305.87  13
   3   1 -14 3295.62 1199.28  16
   3  -1 -14 4330.56 1912.17  31
   3   1 -14 3441.88 1297.45  14
   3  -1 -14 3179.21 1082.89  13
   3   1 -13 15884.2 3820.83  31
   3   1 -13 15572.9 2688.14  13
   3   1 -13 18107.1 2675.25  14
   3  -1 -13 13109.1 3671.86  31
   3  -1 -13 17226.7 2868.91  13
   3   1 -13 17433.9 2656.31  16
   3   1 -12 861.988 481.675  13
   3   1 -12-1138.96 1051.81  38
   3   1 -12 383.446 553.736  31
   3   1 -12 509.323 639.125  16
   3  -1 -12 485.528 472.741  31
   3  -1 -11 13244.5 4279.76  33
   3   1 -11 13590.7 3974.23  37
   3   1 -11 23417.2 4496.81  38
   3  -1 -10 3720.75 1894.32  33
   3   1 -10 5962.83 1974.88  38
   3   1 -10 4056.08 1288.59  40
   3  -1 -10 4786.37 1930.33  38
   3   1 -10 3121.99 1750.75  37
   3   1  -9 23238.4 3870.57  38
   3  -1  -9 15128.9 3858.72  33
   3  -1  -9 16961.8 2581.06  40
   3  -1  -9 23393.1 3848.22  38
   3   1  -9 22952.4 3133.07  36
   3   1  -9 16585.8 2389.81  40
   3  -1  -9 23245.1 2874.68  36
   3   1  -9 11062.7 3128.03  37
   3  -1  -8 2713.81 903.261  40
   3   1  -8 2985.02 921.189  40
   3   1  -8 4031.43 1257.12  36
   3  -1  -8 4030.41 1510.30  38
   3   1  -8 4587.46 1517.96  38
   3  -1  -8 1455.34 1186.21  33
   3   1  -8 1160.37 871.233  37
   3  -1  -8 4291.56 1138.71  36
   3  -1  -7 77147.0 4517.78  36
   3   1  -7 73011.0 4880.44  36
   3  -1  -7 61734.0 4069.17  40
   3   1  -7 75844.8 6016.29  38
   3  -1  -7 99662.4 7043.90  38
   3  -1  -7 32808.5 4686.97  33
   3   1  -7 56661.4 3695.64  40
   3   1  -7 18473.1 3229.11  37
   3   1  -6 597.725 519.578  28
   3   1  -6 346.121 344.153  37
  -3  -1   6 292.827 365.526  29
   3  -1  -6 1934.94 958.621  38
   3   1  -6 1197.93 570.310  36
   3  -1  -6 1211.57 508.244  40
   3  -1  -6 38.5663 454.203  33
   3  -1  -6 1984.19 614.737  36
  -3   1   6 1652.14 378.671   1
   3   1  -6 1273.37 715.669  38
   3   1  -6 1238.72 495.437  40
   3   1  -5 9272.44 2115.70  28
   3   1  -5 13234.0 1765.57  36
   3  -1  -5 30582.6 2379.48  40
   3   1  -5 27376.4 1260.18   2
  -3  -1   5 27646.9 1051.61  41
  -3  -1   5 9173.31 2191.86  29
   3   1  -5 31925.4 3263.93  38
   3  -1  -5 41616.2 4002.36  38
  -3   1   5 33455.1 1721.33   1
   3  -1  -5 16952.2 2818.75  33
   3  -1  -5 35025.0 2249.96  36
   3   1  -5 29399.8 2144.85  40
  -3   1   5 26977.9 1954.62  41
   3   1  -4 26806.7 1250.09   2
   3   1  -4 13143.0 2192.51  28
   3   1  -4 31606.3 2015.93  40
  -3  -1   4 22346.3 992.967  41
   3   1  -4 9568.10 1354.40  36
  -3   1   4 27216.1 1025.36   2
   3  -1  -4 26195.2 1678.77  36
   3  -1  -4 16757.8 2640.74  33
   3  -1  -3 13360.2 2125.92  33
  -3  -1   3 20799.4 1046.34  41
   3   1  -3 9738.87 1758.82  29
   3   1  -3 18008.5 1016.64   2
   3   1  -3 28002.8 1683.55  40
  -3   1   3 26186.3 1121.67   2
   3   1  -2 43015.3 3219.47  29
   3  -1  -2 40292.5 3339.15  33
  -3   1   2 44362.0 1059.62  35
   3   1  -2 49816.4 1662.77   2
  -3  -1   2 54399.5 1748.76  41
   3  -1  -1 53866.1 4510.60  34
   3   1  -1 62790.7 1891.82   2
   3  -1  -1 64702.2 5201.68  30
   3   1   0 11521.8 822.745   2
   3  -1   0 10820.7 660.965   1
  -3  -1  -1 620496. 5705.17  41
   3  -1   1 716618. 6841.80   1
  -3  -1  -1 658014. 13478.1  34
   3   1   1 781356. 7161.52   2
  -3  -1  -1 830262. 16049.9  30
   3  -1   2 5950.58 748.910   1
  -3  -1  -2 6995.59 1248.26  33
   3   1   2 7275.72 1621.22  30
  -3   1  -2 3731.13 893.874  29
   3   1   2 9643.77 864.426   2
  -3   1  -2 5235.91 716.015  38
  -3  -1  -2 6590.08 1257.45  39
  -3  -1  -2 6815.58 575.349  41
  -3  -1  -3 374233. 10462.3  39
  -3   1  -3 334886. 9504.64  29
  -3   1  -3 339278. 9548.89  28
  -3  -1  -3 381769. 10408.9  33
  -3   1  -3 428425. 7583.68  38
   3  -1   3 416479. 7151.07   1
   3   1   3 415152. 6377.49   2
  -3   1  -4 2211.20 635.239  38
  -3  -1  -4 2074.24 913.558  33
  -3   1  -4 1761.20 683.738  36
  -3  -1  -4 2951.06 911.467  36
   3  -1   4 2177.12 577.608   1
  -3   1  -4 1378.99 295.622  41
  -3   1  -4 1911.00 763.812  28
   3  -1   5 55569.6 3181.39   1
  -3   1  -5 36332.3 3466.50  37
  -3   1  -5 40858.5 3841.05  36
  -3  -1  -5 51102.2 4559.14  33
  -3  -1  -5 55024.6 4294.17  36
  -3   1  -5 38206.3 2033.25   2
  -3   1  -5 47731.7 3218.15  38
  -3   1  -5 43598.3 4284.90  28
  -3   1  -6 8953.01 1563.21  38
  -3  -1  -6 7965.52 1929.56  33
  -3   1  -6 9440.48 2171.91  28
  -3   1  -6 7461.27 1699.05  37
  -3   1  -6 8004.40 1844.19  36
  -3  -1  -6 9463.54 1915.94  36
   3  -1   6 10348.0 1461.55   1
  -3   1  -7 7110.17 1478.66  38
   3  -1   7 9575.85 1496.63   1
  -3  -1  -7 7214.93 2041.68  33
  -3   1  -7 5670.59 1660.51  36
  -3   1  -7 6525.83 1758.72  37
  -3  -1  -7 7174.37 1884.56  36
   3   1   7 5803.13 1462.36   1
  -3   1  -8 308.474 286.148  37
   3   1   8 774.243 518.689   1
  -3   1  -8 518.551 506.780  36
  -3  -1  -8 1077.39 802.338  36
  -3   1  -8 974.374 575.237  38
  -3  -1  -8 940.230 792.297  33
   3  -1   8 716.393 467.123   1
  -3   1  -9 110905. 8518.96  37
   3  -1   9 131179. 6565.04   1
  -3   1  -9 130380. 8026.88  38
  -3  -1  -9 127084. 9690.74  33
  -3   1 -10-308.307 1013.48  36
  -3   1 -10 371.781 614.718  38
  -3  -1 -10 826.272 700.868  33
  -3  -1 -10-56.5859 391.379  36
  -3   1 -10 135.573 409.807  37
  -3   1 -11 64068.9 6060.78  38
  -3  -1 -11 65812.9 7758.41  36
  -3   1 -12 4456.06 1582.86  31
  -3   1 -12 2801.80 1091.78  16
  -3  -1 -12 3152.19 1492.07  31
  -3   1 -12 2805.14 991.749  19
  -3   1 -13 31176.3 3644.44  16
  -3   1 -13 27506.6 4051.22  31
  -3  -1 -13 32687.2 4652.57  31
  -3   1 -13 28141.1 3811.59  13
  -3   1 -14 17011.2 3041.21  13
  -3  -1 -14 19913.2 3038.62  16
  -3   1 -14 17680.1 2808.24  16
  -3  -1 -14 16242.2 3348.86  31
  -3   1 -14 19253.8 3383.87  31
  -3   1 -15 251.229 522.813  16
  -3   1 -15-130.770 573.394  13
  -3  -1 -15 617.744 602.514  16
  -3   1 -15-43.3499 96.2934  31
  -3  -1 -16-288.313 431.018  16
  -3   1 -16 536.882 594.828  16
  -3   1 -16 631.524 335.764  31
  -3   1 -16-33.0010 334.889  14
  -3   1 -16-47.4843 376.216  13
  -3  -1 -17 534.126 598.124  16
  -3  -1 -17 161.980 286.305  14
  -3   1 -17 893.465 757.892  14
  -3   1 -17 581.079 550.085  13
  -3   1 -17 9.84507 530.293  16
  -3   1 -18 630.980 294.341  14
  -3  -1 -18-210.360 399.541  14
  -3   1 -18-163.272 413.365  13
  -3  -1 -18 238.968 364.043  16
   3   3 -18-460.970 800.752  13
   3   3 -18 593.390 703.101  31
   3   3 -18-186.679 448.291  15
   3  -3 -18-90.1483 208.896  16
   3  -3 -18 919.771 649.979  14
   3   3 -17 1114.31 622.045  15
   3  -3 -17 1626.67 818.417  16
   3  -3 -17 1364.41 548.700  14
   3   3 -17 1117.91 828.088  13
   3   3 -17 1970.46 967.918  31
   3   3 -17 1307.45 711.235  14
   3   3 -16 3892.40 1535.49  14
   3  -3 -16 2360.50 1081.03  16
   3   3 -16 3894.34 1493.89  13
   3   3 -16 2669.74 1501.97  31
   3  -3 -16 3029.30 1064.51  14
   3  -3 -16 1863.59 718.269  27
   3   3 -15 11110.9 2559.53  13
   3  -3 -15 10534.0 1946.63  27
   3   3 -15 13271.0 2830.43  14
   3   3 -15 13879.8 3661.22  31
   3   3 -14 15218.7 2634.14  16
   3   3 -14 16125.5 3906.54  31
   3  -3 -14 16489.0 2330.94  27
   3   3 -14 19072.6 3192.23  14
   3   3 -14 14814.0 2761.27  13
   3   3 -13 42875.0 4582.10  13
   3  -3 -13 49326.9 3884.17  27
   3   3 -13 44907.8 4584.58  16
   3   3 -13 55649.8 5145.22  14
   3   3 -13 45231.8 6384.00  31
   3   3 -12 10884.0 2060.25  13
   3   3 -12 15355.2 2425.94  16
   3   3 -12 15336.7 3521.43  31
   3   3 -12 17860.0 2675.47  14
   3  -3 -12 14891.2 1988.45  27
   3   3 -11 24410.7 5791.03  37
   3  -3 -11 24501.4 6170.76  33
   3  -3 -10 2095.60 1217.09  33
   3   3 -10 1927.98 1369.50  37
   3   3 -10 3600.20 1558.90  38
   3  -3  -9 2141.84 1700.75  33
   3   3  -9 678.246 602.621  28
   3   3  -9 2312.76 1096.57  38
   3   3  -9 106.887 697.815  37
   3  -3  -8 190.987 983.814  33
   3   3  -8 1678.33 963.396  38
   3   3  -8 567.031 619.337  28
   3   3  -8 626.546 621.005  36
   3   3  -7 152233. 9418.51  36
  -3   3   7 185451. 5469.37  35
   3  -3  -7 103754. 10656.7  33
   3   3  -7 148884. 5852.23  40
   3   3  -7 73371.2 8644.05  28
   3  -3  -7 178938. 7885.64  40
   3   3  -7 223704. 11301.2  38
   3   3  -6 35735.5 4297.39  38
   3  -3  -6 17445.0 4381.87  39
   3  -3  -6 30808.6 2959.33  40
  -3   3   6 28415.3 1920.45  35
   3   3  -6 26188.9 1978.27   2
   3   3  -6 24999.8 2138.05  40
   3  -3  -6 16032.5 4010.72  33
   3   3  -6 35483.5 3911.77  36
   3   3  -6 13530.5 3553.30  28
   3   3  -5 88643.3 3658.57  40
   3   3  -5 88678.4 3611.16   2
  -3   3   5 88895.3 3312.46   2
   3  -3  -5 75075.6 8534.50  33
  -3   3   5 94601.2 3193.68  35
   3  -3  -5 104804. 4991.23  40
   3  -3  -5 70175.1 8340.62  39
   3   3  -4 83193.2 3435.75   2
   3  -3  -4 95821.5 4322.25  40
  -3   3   4 86387.5 2794.30  35
  -3   3   4 88230.7 3334.98   2
   3   3  -4 85774.1 3242.88  40
   3  -3  -4 80724.3 8662.23  33
   3  -3  -4 74474.9 8602.41  39
   3   3  -4 76093.5 7797.58  29
   3  -3  -3 29621.4 6305.41  30
   3  -3  -3 28687.5 5808.90  34
   3  -3  -3 32218.5 2206.45  40
   3   3  -3 32848.7 1871.39  40
  -3   3   3 28610.9 1476.39  35
  -3   3   3 33177.1 2101.49   2
   3   3  -3 30201.0 2040.62   2
   3  -3  -2 60767.4 2653.88  40
  -3   3   2 67279.1 3001.13   2
   3  -3  -2 63738.5 9385.73  34
   3   3  -2 62168.6 2854.86   2
   3  -3  -2 74707.2 10625.3  30
  -3   3   2 52727.3 1900.64  35
  -3   3   1 14486.7 1420.75   2
   3  -3  -1 14245.0 4507.12  34
   3   3  -1 13693.1 1306.73   2
  -3   3   0 110122. 4013.86   2
   3   3   0 116743. 3808.42   2
  -3   3  -1 274966. 6531.65   2
  -3  -3  -1 262374. 17093.0  34
   3   3   1 277934. 5787.34   2
  -3   3  -2 38124.0 2484.98   2
   3   3   2 41772.8 2381.63  35
   3   3   2 39133.9 2169.95   2
   3   3   3 620564. 8750.55   2
   3   3   3 644437. 10339.4  35
   3   3   4 811.005 342.658   2
  -3  -3  -4 1949.00 1022.50  39
  -3  -3  -4 1913.55 1348.21  33
   3   3   4 1333.41 547.009  35
  -3   3  -4 668.149 356.382   2
  -3   3  -4 795.309 432.296  29
   3   3   5 242488. 7465.17  35
  -3   3  -5 275848. 10212.1  36
  -3  -3  -5 308094. 15065.2  33
  -3  -3  -5 292170. 14505.2  39
  -3   3  -5 251919. 8776.50  38
   3   3   5 221294. 5703.12   2
  -3   3  -5 194032. 6225.46   2
   3   3   6 5154.86 1152.09  35
  -3  -3  -6 5807.23 2096.35  39
  -3  -3  -6 4744.10 1951.71  33
  -3   3  -6 4348.06 930.807   2
  -3   3  -6 7178.46 1854.83  36
  -3   3  -6 6170.84 1398.89  38
  -3   3  -6 6559.03 2150.82  28
  -3   3  -7 4062.34 1231.18  38
   3   3   7 3314.97 995.772  35
  -3  -3  -7 4746.58 1950.83  33
  -3   3  -7 3958.46 1485.57  36
  -3   3  -7 4261.02 1807.32  28
  -3   3  -8 355.918 550.233  36
  -3  -3  -8 237.263 542.827  33
  -3   3  -8 539.378 561.098  38
  -3   3  -8 270.722 632.044  28
   3   3   8 411.449 307.406  35
  -3   3  -8 53.6081 139.521  37
  -3   3  -9 15515.7 3902.59  28
  -3  -3  -9 15404.2 3784.48  33
  -3   3  -9 15011.7 3379.16  37
  -3   3  -9 14343.4 2640.73  38
   3   3   9 11012.2 2093.28  35
  -3   3  -9 15803.2 3584.63  36
   3   3  10 5695.67 1682.94  35
  -3   3 -10 9658.05 2913.92  37
  -3   3 -10 7922.86 2672.66  36
  -3  -3 -10 9934.84 3255.91  33
  -3   3 -11 109054. 7697.22  31
  -3  -3 -11 102274. 5038.00  27
  -3   3 -11 83793.3 9058.87  37
  -3   3 -11 108901. 6659.09  19
  -3   3 -11 79579.5 9013.02  36
  -3   3 -11 103028. 6409.17  14
  -3   3 -12 2553.34 1052.53  14
  -3  -3 -12 2878.90 923.270  27
  -3   3 -12 2462.34 1022.58  19
  -3   3 -12 2717.69 1291.73  31
  -3   3 -12 1446.10 658.417  16
  -3   3 -13 66699.1 5651.64  19
  -3   3 -13 65108.7 5688.16  14
  -3   3 -13 62851.2 5348.32  16
  -3  -3 -13 74770.7 4836.02  27
  -3   3 -13 60725.8 5955.78  31
  -3   3 -14 528.799 372.311  31
  -3   3 -14 928.271 809.308  14
  -3  -3 -14 751.538 523.312  27
  -3   3 -14 641.008 418.455  16
  -3   3 -14 370.212 466.466  13
  -3   3 -15 718.413 742.839  14
  -3   3 -15-190.555 674.309  31
  -3  -3 -15 138.916 310.425  27
  -3   3 -15-450.229 488.468  13
  -3  -3 -16-33.8330 92.0402  27
  -3   3 -16-34.8443 386.074  31
  -3   3 -16 163.342 205.773  14
  -3  -3 -16 345.561 555.042  16
  -3   3 -16 375.467 449.254  13
  -3   3 -17 5848.69 1445.58  31
  -3  -3 -17 6089.16 1382.53  16
  -3   3 -17 4561.01 1553.51  13
  -3   3 -17 6702.58 1710.98  14
  -3  -3 -17 3437.73 1128.87  14
  -3   3 -17 5305.32 1367.31  15
  -3  -3 -18 1673.90 680.065  16
  -3   3 -18 129.183 192.711  13
  -3   3 -18 1365.50 674.999  15
  -3  -3 -18 559.913 376.409  14
   3  -5 -17 2632.77 879.858  27
   3  -5 -17 2939.12 969.601  16
   3   5 -17 6311.37 2166.83  31
   3   5 -17 4855.45 1575.96  15
   3   5 -17 4858.83 1487.81  13
   3   5 -16 5880.92 1820.93  15
   3   5 -16 6614.35 1901.86  13
   3   5 -16 6434.98 2278.36  31
   3  -5 -16 3472.78 1238.06  16
   3  -5 -16 4934.39 1281.70  27
   3  -5 -15 11072.2 1942.99  27
   3   5 -15 13433.4 3495.40  31
   3   5 -15 10441.7 2420.24  15
   3   5 -15 12734.2 2542.91  13
   3  -5 -14 5607.58 1352.86  27
   3   5 -14 6022.63 1770.46  15
   3   5 -14 5045.35 1646.32  13
   3   5 -14 8817.86 2828.11  31
   3   5 -13 2641.04 1177.01  15
   3   5 -13 5176.33 2225.79  31
   3   5 -13 2786.68 1095.63  13
   3  -5 -13 3494.59 1043.42  27
   3  -5 -12 818.934 643.269  17
   3   5 -12 1325.72 743.403  13
   3  -5 -12 2097.71 857.639  27
   3   5 -12 1828.49 1180.14  15
   3   5 -12 1373.96 747.168  14
   3   5 -12 2343.70 1525.72  31
   3  -5 -11 220.606 334.407  17
   3   5 -11 834.967 933.294  31
   3   5 -11 536.794 350.086  14
   3   5 -11 445.884 491.622  15
   3   5 -11 232.798 35.3471  13
   3   5 -11 177.326 311.941  21
   3  -5 -11 351.466 269.428  27
   3  -5 -11 531.457 579.641  18
   3   5 -10 5310.57 1413.48  21
   3   5 -10 6898.29 2691.60  38
   3  -5 -10 5081.31 1121.60  27
   3  -5 -10 5833.15 1405.49  18
   3   5 -10 5216.80 2120.18  31
   3   5 -10 8113.99 1895.11  14
   3   5 -10 6906.09 1779.69  15
   3  -5 -10 6907.11 2496.68  17
   3   5  -9 5354.86 2346.97  38
   3   5  -9 3187.81 2517.27  28
   3  -5  -9 4104.47 2748.68  33
   3   5  -8 32242.1 7309.40  28
   3   5  -8 56758.2 7180.40  38
   3   5  -8 49898.8 6802.67  36
   3  -5  -8 28320.4 7056.52  39
   3  -5  -8 21554.6 6090.21  33
   3   5  -7 130346. 10707.4  38
   3  -5  -7 64103.4 10661.0  39
   3  -5  -7 51604.3 9790.12  33
   3   5  -7 144409. 10536.7  36
   3  -5  -6 7006.01 3179.09  33
   3  -5  -6 8482.14 3616.70  39
  -3   5   6 15175.1 1570.94  35
   3   5  -6 14838.0 2017.55   2
  -3   5   5 86583.5 4576.18   2
   3  -5  -5 71620.9 11107.6  33
   3  -5  -5 65013.1 10895.5  39
   3   5  -5 78583.3 4579.98   2
  -3   5   5 83768.4 3521.97  35
  -3   5   4 745.908 309.226  35
  -3   5   4 760.305 406.227   2
   3   5  -4 672.046 384.808   2
  -3   5   3 18481.2 2097.84   2
   3  -5  -3 19272.1 6625.32  34
   3   5  -3 16956.3 2027.78   2
  -3   5   3 17513.5 1542.82  35
  -3   5   2 9550.85 1525.59   2
   3  -5  -2 10341.9 4969.40  34
   3   5  -2 8712.06 1411.77   2
   3  -5  -1 65953.7 12649.4  34
   3   5  -1 70701.8 3976.65   2
  -3   5   1 78881.1 4431.98   2
  -3   5   0 1221.71 493.343   2
   3   5   0 1160.32 487.029   2
   3   5   1 62940.7 3660.45   2
  -3   5  -1 68616.3 4322.37   2
   3   5   1 77652.2 3922.53  35
  -3  -5  -1 64454.8 10844.9  34
  -3  -5  -2 3718.01 2459.86  34
  -3   5  -2 1367.29 603.370   2
   3   5   2 1451.51 565.114   2
   3   5   2 1831.04 662.433  35
   3   5   3 22518.3 2245.03  35
   3   5   3 15764.0 1841.29   2
  -3   5  -3 16848.3 2259.26   2
   3   5   4 3173.77 935.080  35
   3   5   4 2312.94 685.867   2
  -3   5  -4 2733.43 914.814   2
  -3   5  -5 538.126 410.891   2
   3   5   5 719.516 407.033   2
   3   5   5 1370.50 618.253  35
  -3  -5  -5 2072.20 1427.45  33
  -3  -5  -5 1110.52 621.675  39
  -3  -5  -6 4041.66 2041.00  39
   3   5   6 4301.61 1105.71  35
  -3   5  -6 5291.35 1742.24  36
  -3  -5  -6 4611.83 2285.09  33
  -3   5  -6 3925.53 1420.60  38
  -3   5  -6 3432.35 1098.18   2
   3   5   7 3697.12 1132.58  35
  -3   5  -7 5064.01 1852.22  36
  -3  -5  -7 3347.41 2076.94  39
  -3  -5  -7 1245.76 719.420  33
  -3   5  -7 5083.28 2404.87  28
  -3   5  -7 4544.89 1563.82  38
  -3   5  -8 4470.57 1594.99  38
  -3   5  -8 4532.34 2020.68  36
  -3   5  -8 5815.92 2635.89  28
  -3  -5  -8 3986.15 2276.55  33
   3   5   8 3935.70 1208.08  35
  -3   5  -9 11031.1 3705.13  28
  -3  -5  -9 10234.8 3430.36  33
  -3   5  -9 11113.9 3363.91  36
   3   5   9 9661.56 1995.47  35
  -3  -5 -10 491.766 1406.44  17
  -3   5 -10 150.606 597.346  31
  -3   5 -10 422.969 136.042  21
  -3  -5 -10 522.515 328.685  27
  -3  -5 -10 833.115 611.042  18
  -3  -5 -11 29806.0 2913.84  27
  -3   5 -11 31554.6 4361.00  31
  -3   5 -11 30062.9 4065.83  15
  -3  -5 -11 34217.3 4998.02  17
  -3   5 -11 27889.1 3655.31  21
  -3  -5 -11 36522.0 3794.19  18
  -3  -5 -12 1516.94 721.262  27
  -3  -5 -12 1702.60 851.367  18
  -3  -5 -12 585.853 406.731  17
  -3   5 -12 737.176 537.422  21
  -3   5 -12 1859.35 1097.54  15
  -3   5 -12 359.455 245.995  31
  -3  -5 -13 10514.9 1788.22  27
  -3   5 -13 8854.55 2025.04  13
  -3   5 -13 8351.90 2094.15  21
  -3   5 -13 10422.5 2455.97  15
  -3   5 -13 9015.05 2273.33  31
  -3   5 -14 5978.04 1633.20  15
  -3   5 -14 4740.05 1545.85  13
  -3  -5 -14 5203.95 1304.08  27
  -3   5 -14 3622.33 1301.46  31
  -3   5 -15-200.077 236.420  13
  -3  -5 -15 226.403 306.662  27
  -3   5 -15 526.574 566.145  31
  -3   5 -16 4004.32 1163.09  31
  -3   5 -16 4131.46 1243.06  15
  -3  -5 -16 5168.80 1282.30  16
  -3  -5 -16 4389.05 1173.22  27
  -3   5 -16 3311.58 1282.52  13
  -3   5 -17 4478.27 1377.76  13
  -3  -5 -17 5818.98 1192.79  16
  -3   5 -17 7291.87 1505.80  15
   3   7 -16 1983.74 893.660  15
   3  -7 -16 2436.63 812.960  27
   3   7 -16 3430.85 1423.10  31
   3   7 -15 10793.5 2761.44  31
   3  -7 -15 8559.86 1602.30  27
   3   7 -15 8214.15 2058.85  15
   3   7 -15 9736.26 1978.58  13
   3   7 -14 6120.38 1804.27  15
   3   7 -14 7404.14 2441.56  31
   3   7 -14 6378.27 1622.92  13
   3  -7 -14 6160.51 1366.36  27
   3   7 -13 27292.9 5003.69  31
   3   7 -13 24338.3 3138.32  13
   3  -7 -13 26381.3 2933.06  27
   3   7 -13 25346.6 3912.70  15
   3  -7 -13 19864.5 4397.02  17
   3  -7 -12 6156.16 2231.60  17
   3   7 -12 7918.77 2776.83  31
   3  -7 -12 7458.81 1543.22  27
   3   7 -12 7252.82 2153.93  15
   3  -7 -12 5858.64 1391.84  18
   3  -7 -11 11249.2 1841.32  27
   3  -7 -11 12225.8 3782.10  17
   3   7 -11 13003.9 2857.37  15
   3   7 -11 12761.6 3542.17  31
   3  -7 -11 11503.7 2130.05  18
   3  -7 -10 603.256 1086.06  17
   3  -7 -10 1928.62 767.743  27
   3   7 -10 3279.64 1973.69  31
   3   7 -10 1945.99 1226.05  15
   3  -7 -10 2085.08 837.701  18
   3  -7 -10 2839.90 843.516  11
   3   7  -9 2138.46 868.625  31
   3   7  -9 3294.30 1308.13  15
   3  -7  -9 3228.73 946.563  11
  -3  -7   9 2727.00 985.741   9
   3  -7  -9 1703.16 782.879  18
   3  -7  -9 2103.63 748.632  27
   3  -7  -8 11103.0 1669.48  27
   3   7  -8 11529.9 2403.70  15
  -3  -7   8 12927.4 2094.25   9
   3   7  -8 11941.7 3361.64  31
   3  -7  -8 18251.1 2258.16  11
   3  -7  -7 5995.46 3636.45  39
   3   7  -7 7794.17 2815.79  31
   3   7  -7 14949.7 4104.02  36
  -3  -7   7 10724.6 1821.77   9
   3   7  -7 8065.24 3525.72  38
   3  -7  -7 16167.0 2256.44  11
   3   7  -7 13338.0 2639.81  15
   3  -7  -6 23235.9 7528.63  33
   3  -7  -6 24757.9 7520.19  39
   3   7  -6 46862.4 4516.77   2
   3  -7  -5 38567.6 9988.95  33
   3  -7  -5 36332.6 9442.25  39
   3   7  -5 66928.9 5381.07   2
   3   7  -4 46930.3 4339.25   2
  -3   7   4 46811.1 4290.22   2
   3   7  -3 35961.2 3678.88   2
  -3   7   3 39299.7 3931.86   2
   3  -7  -2 18399.4 6816.39  34
  -3   7   2 19080.9 2773.54   2
   3   7  -2 16551.5 2461.19   2
   3   7  -1 1414.75 742.601   2
   3  -7  -1 976.440 814.719  34
  -3   7   1 1748.86 877.238   2
   3   7   0 4889.95 1256.23   2
  -3   7   0 6519.43 1627.54   2
  -3  -7   0 3602.43 3659.55  34
   3  -7   0 1527.30 3130.20  34
  -3   7  -1 25743.4 3365.89   2
  -3  -7  -1 26158.3 7567.77  34
   3   7   1 21670.0 2741.22   2
   3   7   2 345.062 325.536   2
  -3  -7  -2 417.291 1596.07  34
  -3   7  -2 282.345 329.978   2
   3   7   3 31093.7 3124.26  35
  -3   7  -3 30259.5 3800.07   2
  -3  -7  -3 35136.0 8374.03  34
   3   7   3 24573.9 2861.00   2
   3   7   4 105.016 89.3969  35
  -3   7  -4 60.4537 319.475   2
   3   7   4 402.539 313.923   2
  -3  -7  -5 56608.2 10150.4  33
  -3  -7  -5 53193.0 9995.93  39
   3   7   5 52427.2 4219.73  35
  -3   7  -5 53133.8 5341.60   2
  -3   7  -6 13161.1 3288.96  36
  -3  -7  -6 6826.43 3738.64  33
   3   7   6 7869.95 1620.08  35
  -3  -7  -6 8728.45 3898.73  39
   3  -7   7 409.765 408.681   9
  -3   7  -7 396.328 96.9826  15
  -3  -7  -7 93.2927 219.870  26
  -3   7  -7 460.325 213.896  31
  -3  -7  -7 430.397 270.550  25
  -3   7  -7 42.0790 312.858  21
  -3  -7  -7 645.177 363.672  27
   3  -7   8 1546.92 789.497   9
  -3   7  -8 756.828 325.152  15
  -3   7  -8 1379.08 779.790  21
  -3  -7  -8 1512.45 611.777  27
  -3   7  -8 1098.04 725.468  31
  -3  -7  -9 14059.2 3468.76  17
   3  -7   9 12580.3 2292.52   9
  -3   7  -9 11741.7 2426.48  21
  -3   7  -9 12803.3 2880.88  31
  -3   7  -9 14327.7 2933.14  15
  -3  -7  -9 14818.8 2566.47  18
  -3  -7  -9 13246.3 1873.52  27
  -3   7 -10 5751.47 1697.11  21
   3  -7  10 6097.76 1649.70   9
  -3   7 -10 7396.61 2183.46  31
  -3  -7 -10 6618.09 1580.89  18
  -3  -7 -10 7101.82 1417.89  27
  -3  -7 -10 6322.09 2154.80  17
  -3   7 -10 7310.25 2021.40  15
   3  -7  11 20209.5 2962.91   9
  -3  -7 -11 27409.7 2913.02  27
  -3  -7 -11 30878.9 3497.94  18
  -3   7 -11 28833.9 4035.85  15
  -3  -7 -11 31427.1 4791.54  17
  -3   7 -11 26577.8 4093.10  31
  -3   7 -11 27787.9 3963.15  21
  -3   7 -12 10037.9 2444.30  31
  -3  -7 -12 12092.4 1883.47  27
  -3   7 -12 9159.31 1953.30  13
  -3  -7 -12 8280.48 2323.59  17
  -3  -7 -12 9255.14 1800.81  18
  -3   7 -12 11280.2 2474.66  15
  -3   7 -13 6035.91 1592.04  13
  -3  -7 -13 8831.20 1598.95  27
  -3   7 -13 8251.50 2025.29  15
  -3   7 -13 7776.41 1980.60  31
  -3  -7 -14-9.66799 259.900  27
  -3   7 -14 60.9470 95.4459  15
  -3   7 -14-116.238 212.854  13
  -3   7 -14-680.966 780.268  31
  -3   7 -15-60.0137 376.022  31
  -3   7 -15 884.573 516.920  15
  -3   7 -15 509.531 472.419  13
  -3  -7 -15 439.593 369.319  27
   3  -9 -14 4572.37 1063.34  27
   3   9 -14 6309.03 1818.93  31
   3   9 -13 6060.24 1989.68  31
   3  -9 -13 6175.62 1274.98  27
   3   9 -12 1036.43 555.957  31
   3  -9 -12 1707.53 671.292  27
   3  -9 -12 1813.92 1355.02  17
   3  -9 -11 306.432 357.528  27
   3  -9 -11 563.987 934.120  17
  -3  -9  11 263.059 102.640   9
   3   9 -11 829.354 730.750  31
   3  -9 -11 353.773 281.212  11
   3  -9 -11-272.795 410.667  18
   3  -9 -10 354.673 1386.72  17
   3  -9 -10 1156.13 521.077  18
  -3  -9  10 1839.77 910.250   9
   3  -9 -10 1488.61 603.945  11
   3  -9 -10 1241.29 605.071  27
   3   9 -10 1279.17 761.011  31
   3  -9  -9 8367.15 1551.54  27
   3  -9  -9 9974.57 1695.61  11
   3   9  -9 10391.8 3151.61  31
  -3  -9   9 10205.4 2140.00   9
   3  -9  -9 5687.96 1233.13  18
   3  -9  -8 5619.28 1296.30  11
   3  -9  -8 4790.87 1138.80  27
  -3  -9   8 4520.74 1376.97   9
   3  -9  -8 3082.27 1124.63  18
   3   9  -8 5314.09 2393.77  31
   3   9  -7 18049.3 4287.93  31
   3  -9  -7 20642.2 2675.38  11
  -3  -9   7 16457.1 2669.04   9
   3  -9  -7 18525.2 2755.36  25
  -3  -9   6 8963.68 1924.80   9
   3   9  -6 9619.42 3201.30  31
   3  -9  -6 12464.5 2136.31  11
   3  -9  -6 9187.42 1841.00  25
   3  -9  -5 10479.1 1939.41  25
   3  -9  -5 6275.90 3886.45   3
   3  -9  -5 16189.5 2539.89  11
   3   9  -5 14178.9 3935.18  31
  -3  -9   5 11886.2 2249.63   9
  -3  -9   4 27632.2 3334.07   9
   3  -9  -4 25707.1 2997.01  25
   3   9  -4 29839.2 5637.30  31
   3  -9  -4 38219.9 3912.25  11
  -3  -9   3 39939.2 4001.42   9
  -3  -9   3 35828.3 3339.46  25
   3  -9  -3 37453.2 3558.07  24
   3  -9  -3 51892.4 4684.52  11
   3   9  -3 48603.7 7262.11  31
  -3  -9   2 56.2586 150.640  25
   3  -9  -2 1153.22 2718.82   3
   3  -9  -2-1506.75 803.517  11
   3  -9  -2 282.719 248.236  24
  -3  -9   2-57.2062 31.2819   9
   3  -9  -1 5934.32 1731.64  11
  -3  -9   1 4565.65 1174.72  25
  -3  -9   1 5327.16 1400.35   9
   3  -9  -1 4052.56 1145.06  24
   3  -9   0 10247.4 2221.27  11
  -3  -9   0 8719.46 1634.39  25
   3  -9   0 10993.5 2045.15   9
  -3  -9   0 11095.2 2084.42   9
   3  -9   0 9798.92 1778.16  24
  -3  -9  -1 3741.93 1085.81  25
   3  -9   1 4505.42 1210.53  24
   3  -9   1 4492.78 1281.24   9
  -3  -9  -2 7241.27 1522.64  25
   3  -9   2 8658.72 1702.56  24
   3  -9   2 8637.49 1813.24   9
  -3  -9  -2 5148.05 2672.37   3
  -3   9  -3 4119.29 1926.20  31
   3  -9   3 3117.94 1112.86   9
  -3  -9  -3 2851.85 988.582  25
  -3  -9  -3 2825.73 1420.74   3
   3  -9   3 3281.58 1108.23  24
  -3  -9  -3 4695.04 1225.12  11
  -3  -9  -4 1194.28 636.018  25
  -3  -9  -4 1059.13 127.257   3
  -3  -9  -4 1117.45 503.521  11
   3  -9   4 883.350 599.249   9
  -3   9  -4 1564.52 1003.76  31
  -3   9  -5-42.3768 835.589  31
  -3  -9  -5 834.022 327.757  11
  -3  -9  -5 908.798 545.547  25
   3  -9   5 470.843 455.919   9
  -3  -9  -5 1248.29 406.910   3
  -3   9  -6 1238.28 695.000  31
   3  -9   6 1350.88 690.021   9
  -3  -9  -6 1411.75 565.210  11
  -3  -9  -6 1327.76 667.271  25
  -3   9  -7 13749.8 3129.44  31
  -3  -9  -7 11668.8 1598.35  11
  -3  -9  -7 11503.6 2183.93  25
   3  -9   7 11019.8 2266.04   9
  -3  -9  -7 11194.8 2135.88  26
  -3   9  -8 5041.80 1893.15  31
  -3  -9  -8 4283.29 1245.05  26
   3  -9   8 4797.68 1472.36   9
  -3   9  -9 7707.10 2154.58  31
   3  -9   9 7152.62 1794.93   9
  -3  -9  -9 8567.10 1567.25  27
  -3  -9  -9 6763.11 2277.76  17
  -3  -9  -9 7282.32 1627.90  18
  -3   9 -10 3329.66 1365.23  31
  -3  -9 -10 2104.46 799.400  18
   3  -9  10 2050.62 935.245   9
  -3  -9 -10-647.473 1151.37  17
  -3  -9 -10 3170.93 940.355  27
  -3   9 -11-361.110 521.886  31
  -3  -9 -11 194.536 295.070  27
  -3  -9 -11 557.326 261.914  18
   3  -9  11 364.802 511.362   9
  -3  -9 -12 1951.25 682.048  27
   3  -9  12 1520.41 823.676   9
  -3   9 -12 1660.52 818.320  31
  -3  -9 -12 1856.30 919.954  17
  -3   9 -13 366.945 395.373  31
  -3  -9 -13 268.299 246.627  27
   3 -11 -11 2317.79 1219.83  17
   3  11 -11 2781.32 1113.50  31
   3  11 -10 142.624 84.4579  31
  -3 -11  10 245.800 286.224   6
   3 -11  -9-104.582 290.262  18
   3 -11  -9 101.811 231.453  17
   3  11  -9 474.154 570.536  31
   3 -11  -8 1313.77 1097.39  17
   3 -11  -8 606.740 252.581  18
   3  11  -8 1804.38 1203.58  31
   3 -11  -7 4542.49 1357.48  26
   3 -11  -7 3726.96 1194.05  25
   3  11  -7 3996.61 1744.08  31
   3 -11  -7 1567.33 488.748  18
   3 -11  -6 3950.51 1254.73  25
   3  11  -6 3138.70 1589.15  31
   3 -11  -5 14751.6 2492.63  25
   3  11  -5 13794.7 3366.63  31
   3 -11  -4 2284.77 992.692  25
   3 -11  -4 393.737 1190.79   3
   3  11  -4 2665.69 1579.04  31
  -3 -11   3 22885.2 2963.25  25
   3  11  -3 21567.8 4341.59  31
   3 -11  -3 23185.5 3098.84  25
  -3 -11   2-202.315 308.487  25
   3 -11  -2-1313.69 2344.57   3
   3 -11  -2 332.930 371.238  25
  -3 -11   2 303.010 427.211   6
   3  11  -2 203.421 598.577  31
   3 -11  -1 5211.07 1411.69  25
  -3 -11   1 5329.34 1449.17  25
   3 -11  -1 2104.77 811.752   3
  -3 -11   1 5357.70 1420.05   6
   3  11  -1 5527.65 2318.13  31
   3 -11   0 1382.63 1592.62   3
  -3 -11   0 1420.50 703.605  25
   3 -11   0 1518.89 746.053  25
  -3 -11   0 844.930 1553.75   3
  -3 -11   0 1486.54 694.620   6
  -3  11  -1 1615.65 1126.99  31
  -3 -11  -1-378.359 1011.52   3
  -3 -11  -1 1912.26 851.255  25
  -3 -11  -1 1490.26 824.387   6
   3 -11   1 1502.48 794.077   9
   3 -11   1 824.592 429.393  25
  -3 -11  -2 4906.77 1343.93  25
   3 -11   2 5098.66 1403.25  25
  -3 -11  -2 2088.04 488.858   3
  -3  11  -2 4212.16 1938.86  31
   3 -11   2 5897.42 1713.97   9
  -3 -11  -3 10694.8 2072.57  25
   3 -11   3 10599.8 2011.48  25
  -3 -11  -3 5392.45 2517.04   3
   3 -11   3 12106.7 2420.34   9
  -3  11  -3 9852.64 2682.08  31
   3 -11   4 7363.94 1910.44   9
  -3 -11  -4 5440.00 1494.63  25
  -3 -11  -4 3874.73 1877.96   3
  -3  11  -4 4273.09 1623.87  31
   3 -11   4 5986.35 1483.38  25
   3 -11   5 9573.63 2131.72   9
  -3  11  -5 7356.32 2062.41  31
  -3 -11  -5 7297.47 1554.90  26
  -3 -11  -5 7639.47 1745.58  25
  -3 -11  -6 391.572 370.728  26
  -3  11  -6-251.144 252.399  31
   3 -11   6 338.240 343.653   9
  -3 -11  -7 189.624 99.8344  18
  -3  11  -7 71.6673 335.410  31
  -3 -11  -7 480.473 423.245  26
   3 -11   7-46.9412 192.984   9
  -3  11  -8 3468.05 1294.14  31
  -3 -11  -8 2533.00 1000.09  26
  -3 -11  -8 1496.15 632.103  17
   3 -11   8 5557.13 1563.99   9
  -3 -11  -8 2574.10 730.941  18
   3 -11   9 4254.42 1298.19   9
  -3 -11  -9 2476.12 1028.48  17
  -3 -11  -9 2415.66 658.373  18
  -3  11  -9 2839.58 1006.59  31
  -3 -11 -10 1915.70 935.770  17
  -3 -11 -10 1762.97 470.532  18
  -3  11 -10 3142.00 973.807  31
  -3 -13   5-370.719 956.081   3
  -3  13   5 155.637 212.447  31
   3  13  -5 856.965 612.566  31
  -3 -13   5 968.231 489.125   6
  -3 -13   4 274.307 923.909   3
  -3  13   4 139.121 360.401  31
   3  13  -4 899.209 536.146  31
  -3 -13   4 4156.74 1084.15   6
   3 -13  -4 3261.57 947.086  26
  -3  13   3-239.068 375.026  31
  -3 -13   3 584.911 380.975   3
  -3 -13   3 1622.63 627.705  26
   3 -13  -3 1380.77 649.273  25
   3  13  -3 416.486 75.6293  31
  -3 -13   3 961.536 503.783   6
  -3  13   2-313.167 328.536  31
   3  13  -2 258.491 321.937  31
   3 -13  -2 708.941 494.159  25
  -3 -13   2 1080.78 1147.53   3
  -3 -13   2 871.131 518.991   6
  -3 -13   1 393.497 386.799  26
   3  13  -1 73.4277 199.340  31
   3 -13  -1 95.6214 267.310  25
  -3 -13   1 231.730 136.712   3
  -3 -13   1-82.1645 217.441   6
  -3 -13   0 1381.29 887.960   3
   3  13   0 20.0863 378.537  31
   3 -13   0 64.8344 535.710   3
   3 -13   0 1706.61 742.194  25
  -3  13   0 232.654 145.913  31
  -3 -13   0 2039.76 732.281  26
  -3  13  -1-134.965 234.843  31
   3  13   1-87.9750 281.938  31
   3 -13   1 298.911 332.482  25
   3 -13   1-918.147 1268.17   3
  -3 -13  -1 269.422 184.217  26
   3 -13   2 8547.12 1569.70   6
   3 -13   2 11467.7 1877.93  25
   3  13   2 1547.33 841.966  31
   3 -13   2 2390.63 1520.81   3
  -3 -13  -2 11580.6 1743.84  26
  -3  13  -2 2965.62 1097.77  31
   3  13   3 36.8158 161.437  31
   3 -13   3 446.384 395.467  25
  -3  13  -3-296.317 459.865  31
   3 -13   3 502.634 330.486   3
   3 -13   3 105.642 134.619   6
  -3 -13  -3-35.7915 261.712  26
   3 -13   4 12500.3 1846.82   6
  -3 -13  -4 2243.51 484.807  18
  -3 -13  -4 13330.3 1805.45  26
  -3  13  -4 6045.84 1393.40  31
   3 -13   4 2622.74 1359.29   3
  -3 -13  -5 71.3480 579.329  17
   4   0 -19 1000.22 925.895  14
   4   0 -18 8352.71 2415.40  13
   4   0 -18 7634.72 1758.12  16
   4   0 -18 9081.99 2156.58  14
   4   0 -17 568.107 833.543  16
   4   0 -17-446.779 575.175  14
   4   0 -17-461.608 1298.36  31
   4   0 -17 1016.37 1243.22  13
   4   0 -16 11465.1 2694.89  13
   4   0 -16 10394.2 2067.39  16
   4   0 -16 11453.1 2364.51  14
   4   0 -16 10999.6 3472.18  31
   4   0 -15 20.3895 814.268  31
   4   0 -15 316.170 387.589  13
   4   0 -15 503.745 713.384  16
   4   0 -15 498.805 405.580  14
   4   0 -14 111670. 7837.93  13
   4   0 -14 95704.1 9867.92  31
   4   0 -14 116686. 7306.99  16
   4   0 -14 116992. 7093.28  14
   4   0 -13 257.660 441.737  13
   4   0 -13 587.978 628.954  16
   4   0 -13 193.058 216.726  31
   4   0 -12 6549.46 2305.62  38
   4   0 -12 9328.57 2709.65  31
   4   0 -11-424.133 617.163  38
   4   0 -10 188696. 12791.1  38
   4   0 -10 122692. 7410.91  40
   4   0  -9 543.226 942.720  33
   4   0  -9-24.1424 296.958  40
   4   0  -9 138.203 320.410  38
   4   0  -8 67880.3 6843.27  33
   4   0  -8 130389. 6417.98  40
   4   0  -8 186611. 10261.1  38
   4   0  -8 189592. 7370.30  36
   4   0  -8 41392.0 5171.25  37
   4   0  -7 95.6411 232.999  40
   4   0  -7 49.0503 382.315  37
   4   0  -7 63.7794 267.280  38
   4   0  -7-953.987 977.923  33
   4   0  -7 3.85075 207.504  36
   4   0  -6 940.349 820.589  37
   4   0  -6 3139.34 789.439  36
  -4   0   6 5354.55 584.810   1
   4   0  -6 1711.80 888.226  33
   4   0  -6 3260.83 1164.45  38
  -4   0   6 795.293 743.147  29
   4   0  -6 3099.68 810.528  40
  -4   0   5 68.9512 55.8058  41
   4   0  -5 169.132 100.469  33
   4   0  -5-235.436 316.014  38
   4   0  -5-3.23431 107.891  40
  -4   0   5 199.785 90.3375   1
   4   0  -5 91.9455 244.942  37
  -4   0   5-133.501 522.925  29
   4   0  -5 5.97329 71.3750  36
   4   0  -4 49965.2 3810.87  33
  -4   0   4 62782.6 2635.26  41
   4   0  -3 44.4378 27.2986  36
   4   0  -3 120.132 136.003  33
   4   0  -3 32.3069 187.255  37
  -4   0   3-64.7966 58.2631  41
   4   0  -2 194467. 5019.74  33
   4   0  -2 231394. 5346.44  37
   4   0  -1-1.60649 38.1300  38
   4   0  -1 65.7476 93.6448  37
  -4   0   0 999999. 8862.14  36
   4   0   1 94.3275 86.8039  29
  -4   0  -1 60.4344 9.00478  41
  -4   0  -1-47.2718 47.6331  33
  -4   0  -1 101.434 65.1290  37
  -4   0  -2 545730. 8303.51  33
  -4   0  -2 532425. 6999.98  41
   4   0   2 521717. 8919.42  29
  -4   0  -3-17.5432 166.328  38
   4   0   3 29.4294 89.2372  29
  -4   0  -3 90.8211 92.6148  41
  -4   0  -3-128.154 248.341  33
  -4   0  -3 75.4228 138.719  37
   4   0   4 153909. 7065.24  29
  -4   0  -4 149988. 6559.00  36
  -4   0  -4 171562. 6624.57  33
  -4   0  -4 141658. 5971.76  37
  -4   0  -4 124367. 2282.01  41
  -4   0  -5 26.8032 235.447  36
  -4   0  -5 242.151 252.760  33
   4   0   5 67.7037 139.902  29
  -4   0  -5 241.095 232.590  38
  -4   0  -5 96.0860 314.909  37
   4   0   5 209.788 274.932   1
  -4   0  -6 28479.6 3318.82  33
   4   0   6 26098.5 3634.73  29
  -4   0  -6 23876.3 3015.08  37
  -4   0  -6 18002.1 2867.93  36
   4   0   6 29469.2 2979.00   1
  -4   0  -6 36943.9 3291.50  38
  -4   0  -7-57.6649 448.682  33
   4   0   7-10.5496 159.955   1
  -4   0  -7 104.586 233.953  38
  -4   0  -7 3.85966 420.894  36
  -4   0  -7-25.8735 322.023  37
  -4   0  -8 163709. 7874.95  38
   4   0   8 170737. 7731.25   1
  -4   0  -9-53.2415 316.861  38
   4   0   9 49.9719 284.457   1
  -4   0  -9-67.5192 210.159  36
  -4   0 -10 34479.9 5370.85  36
  -4   0 -11 688.437 942.496  36
  -4   0 -12 1022.50 601.209  13
  -4   0 -12 331.176 610.670  31
  -4   0 -13 107.978 414.346  13
  -4   0 -13-223.834 666.743  31
  -4   0 -13-19.0035 97.1478  16
  -4   0 -14 6913.77 1937.53  13
  -4   0 -14 6732.59 1864.61  31
  -4   0 -14 7413.36 1841.04  16
  -4   0 -15 59.9749 248.077  16
  -4   0 -15-438.913 760.817  31
  -4   0 -15 427.778 411.636  13
  -4   0 -16 12246.7 2507.92  13
  -4   0 -16 16583.2 2836.18  14
  -4   0 -17-191.823 129.170  14
  -4   0 -17 99.6523 61.4783  16
  -4   0 -18 2488.33 732.823  16
  -4   0 -18 2934.49 1008.16  14
   4   2 -18 798.094 373.519  15
   4   2 -18 1567.19 1246.25  13
   4   2 -18 717.980 289.176  31
   4  -2 -18 372.348 437.560  14
   4  -2 -18 201.873 335.727  16
   4   2 -17 1603.64 1206.82  14
   4   2 -17 2012.74 1082.36  13
   4  -2 -17 1306.11 748.171  16
   4  -2 -17 1896.77 1009.66  14
   4   2 -17 1061.66 879.983  31
   4   2 -16 6781.02 1973.85  13
   4   2 -16 6692.62 1731.90  16
   4   2 -16 10326.0 3264.82  31
   4  -2 -16 7951.31 1944.87  16
   4  -2 -16 7473.42 1711.95  14
   4   2 -16 8306.98 2110.43  14
   4   2 -15 14776.0 2838.32  14
   4   2 -15 11902.6 2538.91  13
   4  -2 -15 14637.7 2681.06  16
   4   2 -15 11629.4 2352.90  16
   4   2 -15 14032.6 3904.22  31
   4  -2 -14 11028.3 3508.59  31
   4   2 -14 15810.0 2778.44  14
   4   2 -14 13813.8 3763.75  31
   4   2 -14 14338.2 2443.30  16
   4   2 -14 14091.1 2672.53  13
   4  -2 -14 15297.8 3019.85  13
   4  -2 -13 4849.64 1585.32  13
   4  -2 -13 3610.95 1837.49  31
   4   2 -13 4637.89 1389.15  13
   4   2 -13 4423.69 1336.73  16
   4  -2 -13 4458.18 1110.01  27
   4   2 -13 5565.75 1536.57  14
   4   2 -13 4635.68 2115.30  31
   4   2 -12 842.401 507.563  13
   4   2 -12 745.941 965.220  31
   4   2 -12 1514.84 605.499  16
   4  -2 -12-821.814 1285.72  31
   4   2 -12 1242.57 566.727  14
   4   2 -11 5595.00 2245.38  38
   4   2 -11 3293.11 2127.96  37
   4  -2 -11 3406.41 2140.54  33
   4   2 -10 41012.5 6655.69  37
   4   2 -10 95524.0 8853.45  38
   4   2 -10 74869.5 5589.56  40
   4  -2 -10 53004.0 8100.41  33
   4  -2  -9 31908.3 3717.87  40
   4  -2  -9 15922.4 4249.01  33
   4   2  -9 29887.9 3236.25  40
   4   2  -9 13159.2 3497.01  37
   4   2  -9 35964.7 4987.87  38
   4  -2  -8 116346. 6471.72  40
   4  -2  -8 66359.6 7900.16  33
   4   2  -8 143095. 9147.89  38
   4   2  -8 105271. 5564.85  40
   4   2  -8 47177.9 6766.74  28
   4   2  -8 40515.7 5567.50  37
   4   2  -8 126734. 7524.88  36
   4  -2  -7 16498.7 3709.07  33
   4   2  -7 16993.0 2628.90  36
   4  -2  -7 22591.6 2592.94  40
   4   2  -7 12897.8 3180.94  28
   4   2  -7 20272.5 2205.12  40
   4   2  -7 25596.0 3736.97  38
   4  -2  -6 90398.4 8214.11  33
   4   2  -6 78858.3 7364.79  28
   4   2  -6 123577. 3694.79   2
   4   2  -6 104859. 4589.34  40
   4   2  -6 116225. 7183.98  38
   4  -2  -6 113989. 5369.41  40
   4  -2  -5 44047.3 5377.94  33
   4   2  -5 43346.4 2721.96  40
   4   2  -5 39233.6 3297.97  36
   4   2  -5 35394.1 4679.58  29
   4  -2  -5 37046.7 4993.94  39
  -4   2   5 49317.4 2097.82  35
   4   2  -5 38454.6 3854.49  38
   4   2  -5 34751.5 4566.15  28
   4  -2  -5 43729.3 3010.21  40
  -4   2   5 42407.0 1827.50   2
   4   2  -5 42431.3 2124.84   2
   4   2  -4 33648.2 2162.01  40
  -4   2   4 32498.7 1681.21   2
   4   2  -4 30466.7 3959.72  29
  -4  -2   4 31090.7 1585.63  41
  -4   2   4 25014.1 1240.14  35
  -4   2   4 20508.7 4164.91  30
   4  -2  -4 26420.6 4023.84  39
   4  -2  -4 30912.0 4337.88  33
   4  -2  -4 31462.9 2277.28  40
   4   2  -4 28801.2 1668.07   2
  -4   2   3 34195.2 1285.52  35
  -4  -2   3 34721.9 1670.88  41
   4  -2  -3 37506.4 4746.72  39
   4   2  -3 34701.2 1825.86   2
   4  -2  -3 36617.6 2152.78  40
  -4   2   3 32454.6 5333.89  30
  -4   2   3 44571.6 2167.85   2
   4   2  -3 41186.4 4504.19  29
   4  -2  -3 42832.1 4932.40  33
   4  -2  -2 13512.3 3419.58  34
  -4  -2   2 13948.9 1056.09  41
   4  -2  -2 9218.34 942.498  40
  -4   2   2 8388.77 569.848  35
   4  -2  -2 14642.0 3407.73  30
   4   2  -2 15645.0 1213.18   2
  -4   2   2 13611.6 1214.09   2
   4  -2  -1 109.689 976.022  30
   4  -2  -1-194.563 780.321  34
   4  -2  -1 64.6437 65.9426  40
  -4   2   1 204.497 124.274   2
   4   2  -1 130.485 129.593   2
  -4   2   0 22529.4 1700.90   2
   4   2   0 17900.8 1265.53   2
  -4  -2  -1 33848.5 4519.98  34
  -4  -2  -1 31292.7 1636.07  41
  -4   2  -1 34632.7 2207.43   2
   4   2   1 39347.0 1904.42   2
   4  -2   1 32000.1 1709.94   1
  -4   2  -2 623453. 9650.44   2
   4  -2   2 641478. 8592.54   1
  -4   2  -3 57381.5 2978.51   2
   4   2   3 51048.3 6667.38  30
   4   2   3 66280.4 2682.44   2
  -4   2  -3 59389.8 4735.58  29
  -4  -2  -3 68801.5 5388.90  33
   4  -2   3 62629.3 2971.84   1
  -4  -2  -3 69410.9 5416.69  39
  -4  -2  -4 25468.5 3415.36  39
   4   2   4 27702.1 1899.94   2
  -4   2  -4 25240.2 2732.05  36
  -4   2  -4 23519.6 3128.01  29
   4   2   4 22878.2 4386.00  30
  -4   2  -4 23274.4 2088.97  38
   4  -2   4 23479.9 1956.21   1
  -4  -2  -4 32640.4 3081.75  36
  -4   2  -4 19787.0 1780.40   2
  -4  -2  -4 29004.8 3649.77  33
  -4  -2  -5 100064. 6056.85  36
  -4   2  -5 57536.9 3127.21   2
  -4   2  -5 69645.1 5745.38  28
  -4  -2  -5 86347.2 6572.61  33
   4  -2   5 81650.9 4000.72   1
   4   2   5 68185.2 7798.27  30
  -4   2  -5 67793.1 5147.59  36
  -4   2  -5 70177.0 3985.98  38
  -4  -2  -6 8523.78 2140.62  33
  -4  -2  -6 9168.74 2062.04  36
   4  -2   6 8984.98 1446.87   1
  -4   2  -6 6469.28 1706.59  36
  -4   2  -6 6233.22 1251.23  38
  -4   2  -6 5994.67 1751.49  28
  -4   2  -6 5209.42 918.935   2
   4  -2   7 49581.9 3697.54   1
  -4   2  -7 44125.8 4678.19  37
  -4  -2  -7 54694.0 5897.52  33
  -4   2  -7 49596.0 5162.58  36
  -4   2  -7 48078.3 3886.11  38
  -4  -2  -7 58399.5 5350.04  36
  -4   2  -7 48049.7 5564.52  28
  -4  -2  -8 77157.0 7389.08  33
  -4   2  -8 79096.8 7082.90  36
  -4   2  -8 68726.4 6315.16  37
   4  -2   8 72667.7 4793.13   1
  -4   2  -8 67836.9 4959.67  38
  -4  -2  -8 88857.4 7124.83  36
  -4  -2  -9 15752.9 3511.83  33
  -4  -2  -9 14678.9 3242.89  36
   4  -2   9 12359.0 2059.55   1
  -4   2  -9 14953.1 3334.27  36
  -4   2  -9 13160.9 2342.17  38
  -4   2  -9 13893.1 3015.93  37
  -4  -2 -10 62132.4 7286.30  33
  -4   2 -10 57309.0 6551.77  37
  -4   2 -10 57966.4 7178.05  36
  -4  -2 -10 65576.9 6835.89  36
  -4   2 -11 561.572 453.837  16
  -4   2 -11-215.032 420.157  37
  -4  -2 -11-520.478 683.716  33
  -4   2 -12 15234.4 2552.93  19
  -4   2 -12 16627.6 2517.41  16
  -4  -2 -12 16858.1 3160.50  31
  -4  -2 -12 18031.1 2246.84  27
  -4   2 -12 14571.4 2721.47  31
  -4   2 -13-464.443 704.758  31
  -4  -2 -13 141.801 70.6185  27
  -4   2 -13 464.536 592.192  16
  -4   2 -13 443.686 583.933  19
  -4   2 -14 8523.35 2090.05  13
  -4   2 -14 8722.56 2113.30  14
  -4   2 -14 10276.6 2034.20  16
  -4  -2 -14 10541.8 1957.82  27
  -4   2 -14 8974.91 2004.69  19
  -4   2 -14 7531.45 1948.83  31
  -4   2 -15 2884.33 889.507  13
  -4   2 -15 4791.88 1257.15  16
  -4  -2 -15 4348.91 1235.72  27
  -4   2 -15 3828.82 1248.45  31
  -4  -2 -15 5883.60 1605.25  16
  -4   2 -15 4445.88 1595.33  14
  -4   2 -16 6365.60 1480.45  16
  -4   2 -16 4227.13 1350.50  14
  -4  -2 -16 7493.94 1702.70  16
  -4   2 -16 3631.96 1371.25  13
  -4   2 -16 6024.03 1646.02  31
  -4   2 -17 166.781 480.063  13
  -4   2 -17 502.173 359.910  14
  -4  -2 -17-222.468 544.596  14
  -4  -2 -17 28.9317 376.805  16
  -4   2 -18 4507.03 1265.37  14
  -4  -2 -18 3524.40 864.221  16
  -4   2 -18 3637.10 1034.29  15
  -4  -2 -18 1240.55 542.241  14
   4   4 -18 11615.0 2268.89  15
   4  -4 -18 8985.37 1560.17  16
   4   4 -18 13698.1 2691.92  13
   4   4 -18 16007.5 3286.90  31
   4  -4 -17 1537.41 685.015  16
   4   4 -17 2337.20 1501.65  31
   4   4 -17 1279.27 755.540  13
   4   4 -17 2178.56 1186.83  15
   4  -4 -17 1862.88 783.054  27
   4  -4 -17 943.506 298.729  14
   4   4 -16 31978.0 4359.58  15
   4   4 -16 36232.4 5891.47  31
   4  -4 -16 27712.7 3361.19  16
   4   4 -16 29295.8 4140.53  13
   4  -4 -16 34242.1 3544.33  27
   4  -4 -16 28698.5 3125.07  14
   4   4 -15 9512.60 3014.82  31
   4   4 -15 9757.58 2449.68  14
   4   4 -15 8927.73 2167.88  13
   4  -4 -15 7746.93 1659.34  27
   4   4 -15 9727.56 2366.47  15
   4   4 -14 11661.3 2405.71  13
   4   4 -14 14533.9 2899.63  14
   4   4 -14 14847.4 3924.19  31
   4  -4 -14 11696.2 2016.63  27
   4   4 -13 9862.07 3091.61  31
   4  -4 -13 9187.03 1704.19  27
   4   4 -13 11825.0 2483.27  14
   4   4 -13 9115.75 2007.63  13
   4   4 -12 41.5532 76.1171  13
   4  -4 -12-44.2854 130.262  27
   4   4 -12 442.057 534.730  14
   4  -4 -12 331.109 1300.28  17
   4   4 -12-104.276 435.289  31
   4  -4 -11 5261.60 1150.82  27
   4  -4 -11 2682.51 943.343  17
   4   4 -11 7986.34 1836.81  14
   4   4 -11 3607.78 1711.92  31
   4   4 -11 5537.30 1464.01  21
   4  -4 -11 6342.66 1387.33  18
   4   4 -11 4665.97 1262.28  13
   4   4 -10 16265.8 4812.47  37
   4   4 -10 27079.0 5048.42  38
   4   4 -10 16626.1 5279.11  28
   4  -4 -10 14583.3 5129.47  33
   4   4  -9 186.652 577.600  28
   4   4  -9-241.784 984.479  38
   4  -4  -9 191.199 819.609  33
   4  -4  -8 66783.0 10176.3  33
   4   4  -8 63191.1 9354.93  28
   4  -4  -7 2251.18 2070.39  39
   4  -4  -7-570.951 737.148  33
   4   4  -7 852.840 922.310  36
   4   4  -7 352.774 188.913  28
   4   4  -7 588.964 700.009  38
   4  -4  -6 125293. 13320.2  39
  -4   4   6 144344. 4354.94  35
   4  -4  -6 139749. 13951.1  33
   4   4  -6 130291. 5207.18   2
  -4   4   5 1497.23 438.579  35
   4  -4  -5 615.957 1088.18  33
   4  -4  -5 1308.52 890.071  39
   4   4  -5 1165.22 513.689   2
  -4   4   5 1111.56 475.432   2
   4   4  -4 609.335 359.606   2
  -4   4   4 998.957 496.139   2
  -4   4   4 940.114 354.919  35
   4  -4  -3 1086.31 423.221  34
   4   4  -3 441.286 371.541   2
  -4   4   3 640.188 419.252   2
  -4   4   3 649.170 331.431  35
  -4   4   2 78497.3 3958.79   2
   4   4  -2 72923.2 3588.56   2
  -4   4   1 31045.6 2497.64   2
   4   4  -1 31767.0 2311.27   2
   4  -4  -1 34355.4 8263.12  34
   4   4   0 408097. 8249.65   2
  -4   4   0 401568. 9191.75   2
  -4  -4  -1 2102.31 1422.62  30
   4   4   1 1628.57 579.752  35
   4   4   1 1725.92 571.727   2
  -4   4  -1 1272.72 570.177   2
  -4  -4  -1 1965.03 1738.41  34
   4   4   2 258377. 6946.68  35
  -4   4  -2 197593. 6761.08   2
  -4  -4  -2 286295. 18554.8  34
   4   4   2 195099. 5537.78   2
   4   4   3 1286.98 575.228  35
   4   4   3 935.830 370.671   2
  -4  -4  -3 2248.67 1341.50  34
  -4   4  -3 705.821 421.874   2
   4   4   4 59439.5 3212.84   2
   4   4   4 77568.8 4250.62  35
  -4  -4  -4 91339.2 8945.90  39
  -4  -4  -4 86067.8 8756.45  33
  -4   4  -4 60331.9 3986.05   2
  -4   4  -5 4319.35 1287.63  36
   4   4   5 5383.37 1244.11  35
  -4   4  -5 3814.72 1032.99   2
  -4  -4  -5 6838.34 2422.99  39
  -4  -4  -5 5227.71 2081.50  33
   4   4   5 3588.58 840.089   2
  -4   4  -6 11930.3 2085.42  38
  -4   4  -6 9109.35 1619.22   2
  -4  -4  -6 10428.7 3102.13  39
  -4   4  -6 12996.3 2572.47  36
  -4  -4  -6 12655.7 3378.53  33
   4   4   6 11078.3 1804.78  35
  -4   4  -7 1714.93 755.169  38
   4   4   7 992.553 538.364  35
  -4  -4  -7 2610.36 1454.21  33
  -4   4  -7 1832.16 976.991  36
  -4   4  -7 2584.03 1532.24  28
  -4   4  -8 50285.8 4717.79  38
  -4   4  -8 64492.9 7806.04  28
   4   4   8 49841.0 4333.14  35
  -4   4  -8 57292.7 6733.42  36
  -4  -4  -8 58165.4 7619.24  33
  -4   4  -9 3238.01 1565.24  36
  -4   4  -9 3282.42 1591.08  37
   4   4   9 2004.10 869.959  35
  -4   4  -9 2483.50 1590.22  28
  -4  -4  -9 1394.50 837.117  33
  -4  -4 -10 9874.65 1534.89  27
  -4   4 -10 10418.7 2062.74  19
  -4   4 -10 8529.52 2666.42  37
  -4  -4 -10 13219.5 2089.82  18
  -4   4 -10 9572.46 1980.38  21
  -4   4 -10 9710.39 3024.91  36
   4   4  10 7719.04 1895.10  35
  -4   4 -10 7578.77 1704.50  16
  -4  -4 -11 7373.38 1386.53  27
  -4   4 -11 7600.58 1988.15  31
  -4  -4 -11 9653.56 1817.18  18
  -4   4 -11 6644.57 1737.05  21
  -4   4 -11 7114.98 1737.35  16
  -4  -4 -11 9056.79 2622.53  17
  -4   4 -11 8161.96 1949.11  19
  -4  -4 -12 5218.27 1247.10  27
  -4   4 -12 5724.01 1578.31  16
  -4   4 -12 4424.33 1448.85  21
  -4   4 -12 5617.50 1759.03  31
  -4   4 -13 828.348 499.111  14
  -4   4 -13 441.980 234.563  21
  -4  -4 -13 1422.40 635.691  27
  -4   4 -13 490.273 349.409  31
  -4   4 -14 6762.19 1887.98  13
  -4   4 -14 6284.03 1799.59  31
  -4   4 -14 5510.86 1638.63  14
  -4  -4 -14 6744.31 1482.99  27
  -4   4 -15 2921.43 1078.13  13
  -4  -4 -15 3178.85 1015.19  27
  -4   4 -15 4585.87 1489.47  15
  -4   4 -15 4267.72 1409.92  14
  -4   4 -15 3449.04 1249.98  31
  -4  -4 -16 15223.7 2176.06  27
  -4   4 -16 16580.1 2474.28  31
  -4   4 -16 21622.9 2999.78  15
  -4  -4 -16 22104.2 2758.03  16
  -4   4 -16 14750.3 2784.92  13
  -4  -4 -17 2331.07 776.022  16
  -4   4 -17 2045.30 825.694  15
  -4  -4 -17 857.827 519.121  14
  -4  -4 -17 566.435 222.047  27
  -4   4 -17 1623.51 812.428  13
   4  -6 -17 7874.69 1508.67  27
   4   6 -17 11173.7 2134.08  13
   4   6 -17 11146.0 2598.02  31
   4   6 -17 8973.87 1903.57  15
   4   6 -16 10107.0 2257.79  15
   4   6 -16 14545.2 3379.30  31
   4   6 -16 11032.0 2192.91  13
   4  -6 -16 12367.1 1973.65  27
   4  -6 -16 7060.29 1428.66  16
   4   6 -15 13197.0 3535.35  31
   4   6 -15 12234.6 2356.61  13
   4  -6 -15 11349.1 1919.22  27
   4   6 -15 12839.0 2635.05  15
   4  -6 -14 4114.14 1214.53  27
   4   6 -14 4773.10 2068.97  31
   4   6 -14 3415.60 1203.21  13
   4   6 -14 3821.38 1520.29  15
   4   6 -13 2870.71 1105.62  13
   4  -6 -13 3051.32 1000.82  27
   4   6 -13 2988.89 1109.42  15
   4   6 -13 3306.32 1873.64  31
   4  -6 -13 3186.83 1338.47  17
   4   6 -12 1047.52 1145.78  31
   4  -6 -12 1279.48 577.531  18
   4   6 -12 1539.53 770.681  13
   4   6 -12 1525.29 1056.61  15
   4  -6 -12-512.518 1262.23  17
   4  -6 -12 803.144 488.098  27
   4   6 -11 2255.23 857.116  13
   4  -6 -11 2194.76 795.716  11
   4  -6 -11 2440.00 801.784  18
   4  -6 -11 1934.65 721.218  27
   4  -6 -11 1758.55 953.135  17
   4   6 -11 2932.64 1295.29  15
   4   6 -11 1118.45 339.656  31
   4  -6 -10 1015.98 540.314  27
   4  -6 -10 1460.13 709.258  11
   4   6 -10 1666.09 1022.18  15
   4   6 -10 73.1268 455.132  31
   4  -6 -10 803.483 411.696  18
   4  -6 -10 86.7095 801.893  17
   4  -6  -9 6646.98 1301.53  27
   4  -6  -9 16980.8 2201.83  11
   4   6  -9 8104.48 2701.91  31
   4   6  -9 15256.5 2683.59  15
   4  -6  -9 12905.9 2167.43  18
   4  -6  -8 13867.7 5683.98  39
   4  -6  -8 10029.2 4701.48  33
   4   6  -8 20270.9 4842.28  38
   4   6  -8 15236.6 5598.85  28
   4  -6  -7 7847.91 4527.02  39
   4   6  -7 9276.28 2690.03  36
   4  -6  -7 3327.46 1753.87  33
   4   6  -7 8853.44 3143.43  38
   4  -6  -6 62034.8 11569.5  33
   4  -6  -6 66396.1 12177.2  39
   4   6  -6 81253.9 5319.88   2
   4  -6  -5 4568.93 2749.43  33
   4  -6  -5 3831.38 2631.38  39
   4   6  -5 4526.43 1222.77   2
  -4   6   5 5489.29 1326.96   2
  -4   6   4 34764.6 3362.40   2
   4   6  -4 32848.4 3258.65   2
   4   6  -3 89.4819 151.521   2
   4  -6  -3-9.86665 1499.20  34
  -4   6   3 28.8603 207.194   2
   4   6  -2 11332.5 1817.77   2
  -4   6   2 13596.2 2120.78   2
   4  -6  -2 18986.6 7395.23  34
   4  -6  -1 1915.44 1756.75  34
   4   6  -1 1832.26 705.994   2
  -4   6   1 1618.65 712.669   2
   4   6   0 51365.9 3705.25   2
  -4   6   0 61238.4 4609.69   2
  -4  -6   0 47486.5 9579.18  34
  -4   6  -1 19943.3 2675.33   2
   4   6   1 20696.8 2317.33  35
   4   6   1 16607.0 2098.68   2
  -4  -6  -1 18238.5 5788.12  34
   4   6   2 4265.73 1029.53   2
   4   6   2 5849.21 1299.30  35
  -4  -6  -2 8227.86 3270.59  34
  -4   6  -2 4978.44 1352.51   2
   4   6   3 808.192 526.291  35
  -4  -6  -3 1754.05 2143.60  34
   4   6   3 216.697 174.559   2
  -4   6  -3 801.209 558.762   2
   4   6   4 1601.01 636.440   2
   4   6   4 3275.04 995.806  35
  -4   6  -4 2621.94 1065.12   2
  -4  -6  -5 6874.27 3059.96  39
  -4  -6  -5 6203.71 2663.40  33
   4   6   5 6376.73 1384.70  35
  -4   6  -5 5445.08 1568.38   2
  -4  -6  -6 2134.56 1667.85  39
  -4   6  -6 237.331 441.919  36
   4   6   6 242.880 279.148  35
  -4   6  -6 532.761 733.667   2
  -4  -6  -6-112.073 1258.30  33
  -4   6  -7 22828.6 5480.99  28
  -4  -6  -7 20283.0 5082.85  39
  -4  -6  -7 17226.6 4709.61  33
  -4   6  -7 20998.1 4211.40  36
   4   6   7 16168.6 2496.37  35
   4  -6   8 15699.9 2371.11   9
  -4   6  -8 17026.7 3057.69  31
   4   6   8 11385.7 2189.75  35
  -4   6  -8 19668.5 4484.60  36
  -4  -6  -8 10537.5 1525.37  27
  -4   6  -8 16838.8 2860.31  15
  -4   6  -8 15076.5 2516.55  21
  -4  -6  -9 6882.75 1321.93  27
  -4   6  -9 7663.78 2075.51  31
   4  -6   9 7839.75 1787.37   9
  -4   6  -9 8590.34 2182.91  15
  -4  -6  -9 9780.81 2011.86  18
  -4   6  -9 6958.95 1791.85  21
  -4  -6  -9 4725.70 1124.33  17
  -4   6 -10 34308.1 4334.59  15
  -4   6 -10 26632.2 3900.19  31
   4  -6  10 24047.2 3139.83   9
  -4  -6 -10 38298.3 3827.44  18
  -4  -6 -10 29398.5 2830.22  27
  -4  -6 -10 34327.3 4882.55  17
  -4   6 -10 26430.5 3682.79  21
  -4  -6 -11 1517.19 623.932  27
  -4  -6 -11 2287.04 941.985  18
  -4   6 -11 2496.78 1246.31  31
  -4   6 -11 1104.44 382.944  21
  -4   6 -11 1990.70 1015.53  15
  -4  -6 -11 1999.02 1030.67  17
  -4  -6 -12 13667.3 2006.73  27
  -4   6 -12 14421.2 2740.07  15
  -4  -6 -12 18155.0 2639.54  18
  -4   6 -12 11230.6 2471.37  31
  -4  -6 -12 14441.2 3018.48  17
  -4   6 -12 12130.8 2573.75  21
  -4  -6 -13 524.403 395.647  27
  -4   6 -13-84.4845 457.895  13
  -4   6 -13 940.021 744.703  15
  -4   6 -13 244.896 456.361  31
  -4   6 -13 138.325 199.842  21
  -4   6 -14 2592.66 1092.18  13
  -4  -6 -14 2159.18 805.110  27
  -4   6 -14 2741.39 1006.06  31
  -4   6 -14 2832.21 1135.88  15
  -4   6 -15 5898.35 1620.66  13
  -4   6 -15 8719.37 1823.55  15
  -4  -6 -15 8271.72 1548.90  27
  -4   6 -15 7877.68 1649.08  31
  -4   6 -16 10009.2 1722.88  15
  -4   6 -16 6961.94 1624.18  13
  -4  -6 -16 7213.76 1324.97  16
  -4  -6 -16 6233.77 1262.38  27
   4   8 -15 5460.88 1813.59  31
   4  -8 -15 5047.49 1172.79  27
   4  -8 -14 11342.2 1821.65  27
   4   8 -14 11566.7 2910.73  31
   4  -8 -13 4627.90 1185.00  27
   4  -8 -13 3459.83 1513.26  17
   4   8 -13 4818.08 1631.51  15
   4   8 -13 5859.74 2251.15  31
   4  -8 -12 1040.28 476.875  27
   4   8 -12 1545.74 903.180  15
   4  -8 -12 1024.55 1068.34  17
   4  -8 -12 343.917 308.146  18
   4   8 -12-17.1893 1156.94  31
   4  -8 -11 672.683 483.874  27
   4  -8 -11 1438.31 1049.35  17
   4   8 -11 707.545 360.047  31
   4  -8 -11 102.312 359.819  18
   4   8 -11 991.823 621.803  15
   4  -8 -11 1335.87 586.568  11
   4  -8 -10 507.378 405.557  27
   4  -8 -10 484.146 389.848  11
   4  -8 -10 172.602 359.907  18
  -4  -8  10 383.652 435.780   9
   4   8 -10 710.646 912.829  31
   4  -8 -10-78.8722 698.684  17
   4   8 -10 639.529 594.939  15
  -4  -8   9 1480.47 805.813   9
   4   8  -9 460.239 991.609  31
   4  -8  -9 892.136 545.807  11
   4  -8  -9 907.510 465.631  18
   4   8  -9 816.829 185.365  15
   4  -8  -9 919.723 539.243  27
   4  -8  -8 12925.6 1880.58  27
   4   8  -8 13696.3 3783.54  31
  -4  -8   8 14788.7 2396.73   9
   4   8  -8 17061.4 3176.89  15
   4  -8  -8 21492.5 2663.66  11
   4  -8  -7 7073.43 1576.38  25
  -4  -8   7 7107.37 1642.04   9
   4  -8  -7 8806.43 1730.89  11
   4  -8  -7 6046.23 1234.18  27
   4   8  -7 8852.48 3044.97  31
   4  -8  -6 8609.09 1656.57  25
   4  -8  -6 8879.04 4536.95   3
  -4  -8   6 10058.1 1906.69   9
   4  -8  -6 16308.0 2422.28  11
   4   8  -6 13670.8 3736.06  31
   4  -8  -5 6473.33 1383.21  24
   4  -8  -5 6669.83 2040.49   3
  -4  -8   5 5058.23 1299.10   9
   4   8  -5 5191.81 2181.59  31
   4  -8  -5 11017.4 2124.04  11
   4   8  -4 146.006 628.733  31
  -4  -8   4 422.086 227.313   9
   4  -8  -4 326.537 355.235  24
   4  -8  -4 1860.62 1014.84   3
  -4   8   4 253.142 638.962   2
   4   8  -4 798.277 641.690   2
   4  -8  -4 727.470 423.224  11
   4   8  -3 2710.61 1052.83   2
   4  -8  -3 3478.72 3236.62  34
  -4   8   3 3078.87 1216.13   2
   4   8  -2 5902.20 1558.55   2
   4  -8  -2 1328.83 1560.29  34
  -4   8   2 7477.77 2015.37   2
  -4  -8   1-109.105 2272.70  34
   4  -8  -1 467.585 589.235  34
   4   8  -1 1448.35 783.817   2
  -4   8   1 1738.53 1052.88   2
  -4   8   0 18534.1 3161.13   2
   4  -8   0 16134.3 6943.27  34
   4   8   0 16319.3 2540.58   2
  -4  -8   0 16861.5 6107.81  34
  -4  -8  -1 8781.89 4517.70  34
   4   8   1 7499.04 1731.31   2
   4  -8   1 6087.57 4199.95  34
  -4   8  -1 9958.84 2302.86   2
   4  -8   2 8365.39 4117.04  34
   4   8   2 19321.0 2790.52   2
  -4  -8  -2 20888.4 6499.22  34
  -4   8  -2 24365.5 3781.33   2
  -4  -8  -3 764.181 531.122  25
   4   8   3 587.177 344.411   2
   4  -8   3 715.375 412.784   9
  -4   8  -3 718.929 679.045   2
   4  -8   4-177.390 460.855   9
  -4   8  -4 121.945 183.276  21
  -4  -8  -4 584.581 452.259  25
  -4  -8  -4 262.811 363.540  11
  -4   8  -4 659.529 698.947  31
  -4  -8  -5 600.403 408.154  25
  -4  -8  -5 499.481 1067.92   3
  -4   8  -5 763.534 519.252  21
  -4  -8  -5 320.576 97.3531  11
   4  -8   5 419.826 420.053   9
  -4   8  -5 1015.08 353.827  31
  -4  -8  -6 5969.34 1434.85  25
  -4   8  -6 5867.62 1637.61  21
   4  -8   6 5274.68 1453.76   9
  -4   8  -6 6697.34 2095.84  31
  -4  -8  -7 1105.18 517.465  27
  -4   8  -7 2029.60 1245.60  15
  -4  -8  -7 1055.10 628.495  26
   4  -8   7 1028.32 710.068   9
  -4   8  -7 1213.71 737.348  31
  -4  -8  -7 870.666 524.131  25
  -4   8  -7 894.568 547.287  21
   4  -8   8 43487.6 4502.66   9
  -4  -8  -8 48208.9 3601.72  27
  -4   8  -8 43007.2 4834.97  21
  -4  -8  -8 45491.1 4413.96  26
  -4   8  -8 53610.8 5700.52  15
  -4   8  -8 44578.2 5330.43  31
  -4  -8  -9 7772.20 1448.67  27
  -4   8  -9 7935.46 2149.67  31
  -4  -8  -9 7604.83 1717.58  18
   4  -8   9 7205.32 1853.08   9
  -4   8  -9 7910.20 2069.04  15
  -4  -8  -9 6007.33 2090.64  17
  -4   8  -9 7877.88 2107.71  21
  -4  -8 -10 14302.0 2071.75  27
  -4   8 -10 14543.0 2869.31  21
   4  -8  10 11733.1 2326.77   9
  -4  -8 -10 16973.2 2474.95  18
  -4  -8 -10 16051.2 3367.13  17
  -4   8 -10 17032.7 3090.49  15
  -4   8 -10 14272.8 2878.21  31
   4  -8  11 4221.96 1303.12   9
  -4   8 -11 5211.73 1611.38  31
  -4  -8 -11 6578.24 1468.73  18
  -4  -8 -11 6892.67 1442.49  27
  -4  -8 -11 5372.51 1594.11  17
  -4   8 -11 6995.01 1810.11  15
  -4  -8 -12 918.687 493.074  18
  -4   8 -12 737.624 450.329  13
  -4   8 -12 67.1310 283.213  31
  -4   8 -12 896.728 759.442  15
  -4  -8 -12 450.933 339.797  17
  -4  -8 -12 898.612 462.854  27
  -4  -8 -13 1187.21 584.853  27
  -4   8 -13 180.662 357.139  31
  -4   8 -13 564.159 305.724  13
  -4   8 -14 1605.67 595.108  31
  -4  -8 -14 1810.72 684.178  27
  -4   8 -14 2185.58 806.776  13
   4  10 -13 150.407 131.732  31
   4 -10 -12 1678.19 795.303  17
   4 -10 -12 2524.09 737.931  27
   4  10 -12 2046.46 1091.66  31
   4 -10 -11 467.486 328.216  17
   4 -10 -11 771.939 358.379  11
  -4 -10  11 797.188 535.851   6
   4 -10 -11 575.458 384.312  27
   4  10 -11 249.066 460.518  31
   4 -10 -10-945.955 996.673  17
   4 -10 -10 406.427 356.225  18
   4 -10 -10-208.742 229.957  27
   4  10 -10 1331.10 1223.58  31
   4 -10 -10 266.624 280.047  11
   4  10  -9 2199.95 1394.83  31
  -4 -10   9 3987.37 1302.84   9
   4 -10  -9 3650.62 986.135  11
   4 -10  -9 3170.25 1752.57  17
   4 -10  -9 1929.50 730.901  18
   4 -10  -8 9410.37 1701.29  11
   4 -10  -8 4414.02 1008.47  18
  -4 -10   8 9061.46 1994.97   9
   4  10  -8 8853.20 2828.51  31
   4 -10  -7 20496.2 2962.44  25
  -4 -10   7 24425.8 3378.31   9
   4  10  -7 22151.7 4607.44  31
   4 -10  -7 25353.5 2958.15  11
   4  10  -6 15002.6 3718.37  31
   4 -10  -6 13306.8 2312.44  11
   4 -10  -6 12107.6 2226.32  25
  -4 -10   6 13282.0 2485.81   9
   4 -10  -5 996.615 671.179  11
   4 -10  -5 764.204 558.005  25
  -4 -10   5 401.100 410.638   9
   4 -10  -5-217.187 1834.22   3
   4  10  -5 1793.47 1856.37  31
   4 -10  -4 85.9010 96.3000  25
   4 -10  -4-248.552 523.459  11
   4 -10  -4-234.016 2488.94   3
  -4 -10   4-336.751 551.928   9
   4  10  -4 412.154 1014.14  31
  -4 -10   3 2516.12 935.173  25
   4 -10  -3 2207.98 929.997  11
   4 -10  -3 1740.40 870.130  25
  -4 -10   3 2646.25 1102.86   9
   4  10  -3 2994.37 1914.27  31
   4 -10  -3 11.9374 1729.05   3
   4 -10  -2 5574.16 1556.01  11
  -4 -10   2 3418.37 1084.24  25
   4 -10  -2 1788.33 1022.82   3
  -4 -10   1 28637.8 3211.44  25
   4 -10  -1 8545.63 3456.51   3
  -4 -10   0 12230.8 2083.07   6
   4 -10   0 15972.9 2683.33   9
  -4 -10   0 12899.1 2192.10  25
   4 -10   0 14597.0 2384.19  24
  -4 -10  -1 11212.4 2070.14   6
  -4 -10  -1 9192.35 1836.02  25
   4 -10   1 11791.9 2138.02  24
   4 -10   1 11733.7 2289.71   9
  -4  10  -2 3691.66 1554.68  31
  -4 -10  -2 3894.94 1202.75  25
   4 -10   2 4259.90 1355.76   9
  -4 -10  -2-451.386 2587.18   3
  -4 -10  -3 137.521 206.151  25
  -4  10  -3 329.249 424.758  31
   4 -10   3 185.749 363.108   9
  -4 -10  -3-642.510 1724.05   3
  -4 -10  -4 257.058 432.969  25
  -4 -10  -4-109.778 1357.26   3
   4 -10   4-134.497 495.946   9
  -4  10  -4 158.079 597.901  31
   4 -10   5 3419.43 1282.39   9
  -4  10  -5 3008.39 1430.15  31
  -4 -10  -5 3233.17 1152.94  25
  -4  10  -6 8473.41 2282.44  31
  -4 -10  -6 7835.48 1712.81  26
   4 -10   6 8566.15 1999.43   9
  -4 -10  -7 11193.8 2119.49  26
  -4  10  -7 12928.3 2770.06  31
   4 -10   7 13327.4 2562.59   9
  -4  10  -8 17307.3 3032.73  31
  -4 -10  -8 10868.9 2094.50  26
  -4 -10  -8 15069.8 2148.43  18
   4 -10   8 20147.9 3090.22   9
  -4 -10  -9 6192.04 1892.86  17
   4 -10   9 11588.0 2296.81   9
  -4 -10  -9 8458.06 1503.53  18
  -4  10  -9 10669.9 2282.10  31
  -4 -10 -10 6008.16 1691.60  17
   4 -10  10 7477.40 1816.25   9
  -4  10 -10 6972.59 1697.96  31
  -4 -10 -10 6394.03 1192.18  18
  -4 -10 -11 2174.96 999.379  17
  -4 -10 -11 1072.14 465.987  18
   4 -10  11 1943.58 851.677   9
  -4  10 -11 2261.24 825.772  31
   4  12  -9 1590.38 839.257  31
   4 -12  -9 365.063 217.652  17
  -4 -12   8 285.919 255.198   6
   4 -12  -8-310.829 856.733  17
   4  12  -8 1294.79 801.682  31
   4  12  -7 2832.96 1251.61  31
  -4 -12   7 2726.92 877.774   6
   4 -12  -7 939.205 537.967  17
  -4 -12   6 1460.43 676.212   6
   4 -12  -6 1709.02 774.600  25
   4 -12  -6 910.503 403.478  26
   4  12  -6 1507.73 991.790  31
   4 -12  -5 1580.12 778.998  25
  -4 -12   5 1815.44 764.356   6
   4  12  -5 769.753 391.456  31
   4  12  -4 470.597 286.672  31
   4 -12  -4 676.168 487.022  25
  -4 -12   4 858.148 553.775   6
   4  12  -3-43.9068 536.412  31
  -4 -12   3 431.824 464.434  25
  -4 -12   3 185.440 196.102   6
  -4 -12   3 455.449 1043.49   3
   4 -12  -3 219.676 371.737  25
  -4 -12   2 1831.40 794.917   6
  -4 -12   2 1527.47 768.495  25
   4 -12  -2 1412.44 719.930  25
   4 -12  -2-401.308 585.371   3
  -4 -12   2 1322.97 1673.11   3
   4  12  -2 439.800 460.054  31
  -4  12   1-63.4517 311.965  31
   4 -12  -1 460.465 661.917   3
  -4 -12   1 558.559 345.173  25
   4 -12  -1 655.831 597.218  25
   4  12  -1 387.499 336.445  31
  -4 -12   1 776.829 402.823   6
  -4 -12   1 784.260 938.061   3
   4 -12   0 144.372 159.271  25
  -4 -12   0-28.6850 324.614  25
   4 -12   0-84.6639 1803.82   3
   4  12   0 966.403 873.699  31
  -4  12   0 141.939 983.831  31
  -4 -12   0 2034.94 2189.75   3
  -4 -12   0 294.076 383.704   6
  -4  12  -1 3425.43 1600.17  31
   4 -12   1 766.106 1092.25   3
   4 -12   1 6895.06 1616.70  25
   4 -12   1 6491.61 1497.27   6
  -4 -12  -1 3540.81 1966.56   3
   4  12   1 2745.53 1351.90  31
  -4 -12  -1 8997.75 1836.21  25
  -4 -12  -2 285.270 334.202  25
   4 -12   2 210.173 200.624  25
  -4 -12  -2 1036.15 1211.05   3
   4 -12   2 1542.00 2232.02   3
  -4  12  -2-697.893 599.344  31
   4 -12   3 9188.48 1789.22  25
   4 -12   3 2718.27 1404.11   3
  -4  12  -3 6729.18 1976.71  31
  -4 -12  -3 8804.56 1620.04  26
  -4 -12  -4-44.6577 255.549  26
   4 -12   4-3.94956 590.873   3
  -4  12  -4 125.527 196.727  31
  -4 -12  -5 1198.28 608.726  26
  -4  12  -5 792.362 568.547  31
   4 -12   5 1234.58 783.472   9
  -4  12  -6 4.71746 253.212  31
  -4 -12  -6 493.471 436.869  26
  -4 -12  -6-179.163 209.066  18
  -4 -12  -7 337.190 298.535  26
  -4 -12  -7 422.216 134.967  18
  -4 -12  -7 535.193 220.048  17
  -4  12  -7 633.300 516.681  31
  -4 -12  -8 509.122 91.7170  18
   5   1 -19 10860.8 2060.05  15
   5   1 -19 11992.0 2790.17  13
   5  -1 -19 11261.7 2033.89  14
   5   1 -18 705.095 442.315  13
   5  -1 -18 1187.82 797.416  16
   5   1 -18 1168.23 611.993  14
   5  -1 -18 1034.48 642.447  14
   5  -1 -18 951.177 854.984  13
   5   1 -17 19640.4 3572.62  13
   5  -1 -17 17867.1 2666.74  16
   5  -1 -17 19289.1 2902.70  14
   5   1 -17 17785.8 2774.25  16
   5   1 -17 19161.9 4547.52  31
   5   1 -17 21444.9 3438.42  14
   5  -1 -17 19467.2 3832.75  13
   5   1 -16 2313.54 1163.85  14
   5  -1 -16 1953.69 1075.16  13
   5   1 -16 2934.32 1310.23  13
   5  -1 -16 1138.71 1174.33  31
   5  -1 -16 1984.99 844.049  16
   5   1 -16 2152.72 856.580  16
   5  -1 -16 2355.39 1006.47  14
   5   1 -16 2582.46 1424.34  31
   5  -1 -15 4198.67 1604.42  13
   5  -1 -15 3304.22 1039.63  14
   5  -1 -15 5581.90 1619.71  16
   5   1 -15 4753.27 1501.01  14
   5  -1 -15 4030.92 1936.71  31
   5   1 -15 3795.31 1429.77  13
   5   1 -15 3945.21 1248.44  16
   5   1 -15 3743.10 1885.01  31
   5  -1 -14 4913.12 2412.44  31
   5   1 -14 10913.4 2142.73  16
   5  -1 -14 9004.27 2126.37  13
   5   1 -14 7094.24 2834.71  31
   5   1 -14 9322.74 1993.78  14
   5  -1 -14 10481.1 2117.68  16
   5   1 -14 8674.57 2107.62  13
   5  -1 -13 1220.08 1084.98  31
   5   1 -13 3938.13 1259.80  14
   5  -1 -13 3349.65 1130.59  16
   5   1 -13 3080.87 1114.34  13
   5  -1 -13 4714.33 1587.25  13
   5   1 -13 2870.37 929.591  16
   5   1 -13 1558.49 1352.59  31
   5   1 -12 639.679 167.312  13
   5  -1 -12-408.332 450.208  31
   5   1 -12 543.449 921.493  38
   5   1 -12 337.989 348.375  14
   5   1 -12 41.0201 891.501  31
   5  -1 -11 176406. 10102.8  40
   5   1 -11 168305. 9483.37  40
   5  -1 -11 209170. 14191.1  38
   5   1 -11 59000.4 8653.00  37
   5   1 -11 211803. 14845.1  38
   5  -1 -11 87940.9 10958.4  33
   5  -1 -10 4689.51 1489.39  40
   5   1 -10 5281.48 1965.10  38
   5  -1 -10-187.892 1046.53  33
   5  -1 -10 5012.73 1969.76  38
   5   1 -10 4908.45 1408.54  40
   5   1 -10 2669.42 1746.34  37
   5  -1  -9 252917. 10100.1  40
   5   1  -9 297388. 14223.3  38
   5   1  -9 129523. 10606.7  37
   5  -1  -9 297312. 15125.6  38
   5   1  -9 249199. 9677.73  40
   5  -1  -9 186572. 13078.8  33
   5   1  -8 5140.60 1275.52  40
   5  -1  -8 5693.47 2014.90  38
   5   1  -8 3825.80 1643.27  37
   5  -1  -8 3189.42 1435.64  33
   5  -1  -8 5433.99 1325.99  40
   5   1  -8 6737.08 1958.39  38
   5   1  -7 7063.44 1347.45  40
   5  -1  -7 5789.54 1971.94  33
   5  -1  -7 7001.65 1411.90  40
   5   1  -7 7028.61 1838.70  38
   5   1  -7 4289.70 1546.82  37
   5   1  -7 9519.97 1499.87  36
   5  -1  -7 8803.57 2355.89  38
  -5  -1   6 26707.4 4007.28  29
   5   1  -6 29437.9 4124.25  28
   5  -1  -6 32231.8 2750.49  40
   5   1  -6 24359.8 3316.39  37
   5   1  -6 41695.2 2923.62  36
   5   1  -6 31523.5 2625.41  40
   5  -1  -6 25609.0 3467.08  38
   5   1  -6 27096.6 3275.87  38
   5  -1  -6 28595.2 4000.61  33
  -5  -1   5 2178.94 1055.25  29
   5  -1  -5 3295.86 791.604  40
   5   1  -5 3482.06 761.959  36
   5   1  -5 1850.40 781.390  38
   5   1  -5 3361.84 781.302  40
  -5  -1   5 3166.92 495.913  41
  -5   1   5 2927.54 754.556  41
   5   1  -5 3731.40 1263.21  28
  -5   1   5 2843.67 386.806   2
   5  -1  -5 2738.47 1198.67  33
   5  -1  -5 2062.57 938.046  38
   5  -1  -4 111559. 6036.66  38
  -5  -1   4 223113. 4540.21  41
   5   1  -4 245585. 6128.76  40
   5   1  -4 199989. 4431.24   2
   5   1  -4 180006. 8109.67  28
   5  -1  -4 213484. 8900.72  33
  -5   1   4 215979. 5965.19  41
   5  -1  -3 11088.1 1838.28  33
  -5   1   3 9189.99 450.150  35
   5   1  -3 12740.0 1946.27  29
   5  -1  -3 10427.1 1844.12  39
   5   1  -3 12639.7 1089.35   2
  -5  -1   3 16389.1 1263.11  41
   5   1  -3 12953.5 1938.28  28
  -5   1   2 12588.8 2149.98  30
  -5  -1   2 12914.5 1212.25  41
   5  -1  -2 10056.6 1629.80  33
   5   1  -2 10531.7 1013.98   2
   5  -1  -2 9327.77 1585.68  39
   5  -1  -1 20838.9 2702.87  30
   5   1  -1 17067.5 946.955  35
   5   1  -1 16979.7 1261.27   2
   5  -1  -1 15848.1 818.013   1
   5  -1  -1 21035.6 2486.56  34
   5   1   0 50608.5 2206.88   2
   5  -1   0 47332.7 1814.70   1
   5   1   0 48869.0 1975.55  35
   5  -1   1 893960. 9621.67   1
  -5  -1  -1 876910. 9140.91  41
   5   1   1 900873. 9720.19   2
  -5   1  -2 55510.2 3185.55  29
   5  -1   2 68932.7 3049.81   1
  -5  -1  -2 60440.6 3415.49  39
  -5  -1  -2 62026.9 2355.69  41
  -5   1  -2 68546.5 2643.88  41
   5   1   2 56994.2 4835.61  30
  -5   1  -2 68996.2 2284.71  38
  -5  -1  -2 61530.3 3526.39  33
   5  -1   3 18268.3 1765.88   1
  -5   1  -3 14083.7 1847.10  28
   5   1   3 13485.7 2406.40  30
  -5   1  -3 12736.5 1207.93  41
  -5  -1  -3 13637.8 1866.19  33
  -5   1  -3 15385.2 1306.66  38
  -5  -1  -3 12951.9 1001.83  41
   5  -1   4 2314.38 712.617   1
  -5   1  -4 907.668 352.768  41
  -5   1  -4 1596.46 719.645  28
  -5  -1  -4 1376.02 740.215  36
  -5  -1  -4 1073.60 580.631  33
  -5   1  -4 1292.30 677.427  36
  -5   1  -4 1376.63 478.702  38
  -5  -1  -4 1329.23 322.005  41
   5  -1   5 172885. 6430.05   1
  -5   1  -5 127133. 6253.61  37
  -5   1  -5 174901. 8030.89  36
  -5  -1  -5 117140. 6701.35  36
  -5   1  -5 153771. 7675.00  28
  -5   1  -5 162189. 5670.29  38
  -5  -1  -5 150904. 7358.24  33
   5  -1   6 98803.8 5142.77   1
  -5   1  -6 73220.1 5202.26  37
  -5   1  -6 105216. 6817.26  36
  -5  -1  -6 87444.6 6143.58  33
  -5   1  -6 92334.5 4681.92  38
  -5  -1  -6 66973.4 5491.40  36
  -5   1  -7 109022. 6873.88  37
  -5   1  -7 124183. 6089.59  38
  -5  -1  -7 87671.6 6887.65  36
  -5  -1  -7 124373. 7844.63  33
  -5   1  -7 144243. 8739.12  36
   5  -1   7 144044. 6625.08   1
  -5   1  -8 12217.9 2456.56  37
  -5   1  -8 15595.0 2387.40  38
   5   1   8 8711.57 2017.88   1
  -5  -1  -8 8268.41 2416.50  36
  -5  -1  -8 14067.0 2852.69  33
   5  -1   8 14074.2 2227.23   1
  -5   1  -8 15138.0 3044.79  36
  -5  -1  -9 46254.2 5841.27  36
  -5   1  -9 69567.2 7178.21  36
  -5  -1  -9 67963.7 6598.55  33
   5   1   9 55714.8 5278.75   1
   5  -1   9 68431.5 5143.26   1
  -5   1  -9 61728.1 6113.86  37
  -5   1  -9 66530.3 5172.16  38
  -5   1 -10 6494.41 2175.75  36
   5  -1  10 4998.64 1415.01   1
  -5  -1 -10 4703.16 1985.80  36
  -5  -1 -11-169.782 371.381  36
  -5   1 -11 820.882 660.015  36
  -5  -1 -12-188.595 459.935  27
  -5   1 -12 69.8101 345.159  16
  -5   1 -12 73.6444 432.743  31
  -5  -1 -12-870.095 775.757  31
  -5   1 -12 45.6461 235.618  19
  -5  -1 -13 48472.9 5315.65  31
  -5   1 -13 52530.2 4925.28  19
  -5   1 -13 58820.3 4962.64  16
  -5   1 -13 52565.9 5200.26  31
  -5   1 -13 43088.1 4828.53  13
  -5   1 -14 132.168 295.779  16
  -5   1 -14 800.202 830.903  13
  -5   1 -14-153.148 537.034  19
  -5   1 -14-95.8230 717.543  31
  -5  -1 -14 167.321 178.494  16
  -5  -1 -15 18072.5 2744.11  16
  -5   1 -15 16547.4 2567.60  16
  -5   1 -15 11177.2 2356.65  14
  -5   1 -15 13839.9 2524.94  31
  -5   1 -15 11307.1 2493.03  13
  -5   1 -16 542.378 439.633  31
  -5   1 -16 821.808 647.924  14
  -5   1 -16 1666.89 738.000  16
  -5  -1 -16 1289.22 500.079  16
  -5   1 -16 384.551 335.564  13
  -5   1 -17 6415.23 1803.75  13
  -5   1 -17 9112.39 1586.21  16
  -5  -1 -17 5422.62 1493.10  14
  -5  -1 -17 9070.18 1539.25  16
  -5   1 -17 8031.68 1782.94  14
  -5  -1 -18 322.637 288.537  14
  -5  -1 -18-316.745 358.795  16
  -5   1 -18-125.766 350.009  14
   5  -3 -18 1255.93 543.511  14
   5  -3 -18 1639.56 651.184  16
   5   3 -18 374.345 525.933  31
   5   3 -18 612.330 429.181  15
   5   3 -18 1173.91 700.836  13
   5   3 -17 15292.0 3842.56  31
   5  -3 -17 11132.2 1991.92  14
   5   3 -17 13157.4 2653.80  15
   5  -3 -17 12481.2 2163.78  16
   5   3 -17 14801.8 2977.87  13
   5   3 -16-185.344 590.408  14
   5   3 -16-282.038 710.927  13
   5  -3 -16-293.276 454.938  16
   5  -3 -16-205.204 338.513  14
   5   3 -16-546.736 1230.52  31
   5  -3 -15 691.535 376.693  27
   5   3 -15 785.238 489.870  14
   5  -3 -15 818.207 276.943  16
   5   3 -15 523.088 420.205  13
   5   3 -15 1319.38 1121.37  31
   5   3 -14-221.519 536.432  13
   5  -3 -14 26.2876 101.453  27
   5   3 -14 31.7601 1043.50  31
   5   3 -14 79.7917 358.754  16
   5   3 -14 352.907 562.240  14
   5   3 -13 6224.92 1686.92  13
   5   3 -13 6844.49 1550.42  16
   5  -3 -13 6940.44 1477.52  27
   5   3 -13 9028.73 2021.00  14
   5   3 -13 4536.90 2303.77  31
   5   3 -12 159.769 226.172  13
   5   3 -12 102.805 261.217  14
   5   3 -12-27.5091 624.604  31
   5  -3 -12 606.703 471.146  27
   5   3 -12 237.877 43.1771  16
   5   3 -11 22637.4 5623.04  37
   5  -3 -11 20566.8 5790.30  33
   5   3 -11 26725.7 5324.72  38
   5   3 -10 444.455 690.889  37
   5  -3 -10 280.089 105.597  33
   5   3  -9 79560.0 10183.1  28
   5   3  -9 74182.2 8773.74  37
   5  -3  -9 123586. 7804.67  40
   5  -3  -9 85171.4 10657.0  33
   5   3  -9 132159. 10366.5  38
   5   3  -8 7435.03 2981.78  28
   5  -3  -8 10056.1 3571.00  33
   5  -3  -8 8851.83 1978.46  40
   5   3  -8 10374.6 2687.80  38
   5   3  -8 8207.10 1601.32  40
   5  -3  -7 44607.2 7016.44  33
   5   3  -7 43092.5 3284.62  40
   5  -3  -7 50484.4 4146.17  40
   5   3  -7 47063.4 6852.25  28
   5   3  -7 51665.1 5754.49  38
   5   3  -6 173784. 12787.7  28
   5   3  -6 145143. 5649.52  40
   5   3  -6 159345. 5185.29   2
   5   3  -6 160278. 8200.11  36
   5  -3  -6 146775. 12252.3  39
   5   3  -6 131418. 8724.06  38
  -5   3   6 156496. 3887.50  35
   5  -3  -6 157672. 6749.57  40
   5  -3  -6 182035. 13588.5  33
  -5   3   5 2461.15 615.105   2
   5  -3  -5 5084.04 2359.04  39
   5  -3  -5 5164.69 2321.64  33
   5  -3  -5 2192.52 764.171  40
   5   3  -5 2271.33 686.870  40
   5   3  -5 2239.01 575.875   2
  -5   3   5 3264.52 547.404  35
  -5   3   4 7845.71 727.999  35
   5   3  -4 6835.47 984.884   2
   5  -3  -4 9650.43 3181.31  39
   5   3  -4 11118.0 2976.59  29
   5  -3  -4 7532.98 1221.73  40
   5  -3  -4 12084.2 3336.68  33
   5   3  -4 8039.62 1204.82  40
  -5   3   4 9643.55 1208.50   2
  -5   3   3 66870.5 1998.20  35
  -5  -3   3 81605.2 3249.29  41
   5   3  -3 75414.8 3224.44   2
  -5   3   3 90926.3 3750.97   2
   5  -3  -3 76585.4 3405.36  40
   5  -3  -2 47571.8 8098.74  30
   5   3  -2 30544.9 2034.12   2
   5  -3  -2 21110.0 1538.35  40
   5  -3  -2 42684.1 7344.21  34
  -5  -3   2 30957.6 2040.04  41
  -5   3   2 32006.4 2287.75   2
   5   3  -1 182141. 4859.39   2
  -5   3   1 207228. 5911.91   2
   5   3  -1 199083. 4793.17  35
  -5  -3   1 177874. 4878.03  41
  -5   3   0 27465.0 2244.18   2
   5   3   0 32573.5 2059.30  35
   5   3   0 33882.3 2093.28   2
  -5  -3  -1 36257.5 5666.28  34
  -5   3  -1 34688.4 2549.85   2
  -5  -3  -1 42096.2 6446.46  30
   5   3   1 37881.7 2363.78  35
   5   3   1 33534.7 2066.69   2
  -5  -3  -2 41541.9 5792.40  30
  -5   3  -2 34007.3 2597.73   2
   5   3   2 36220.6 2466.90  35
  -5  -3  -2 41350.5 5485.78  34
   5   3   2 33323.6 2106.40   2
   5   3   3 11379.0 1494.86  35
   5   3   3 10715.3 1218.07   2
  -5   3  -3 10565.6 1497.03   2
   5   3   4 6728.74 1309.83  35
  -5   3  -4 4168.88 1022.95   2
   5   3   4 7435.25 1136.27   2
   5  -3   4 6562.20 1187.39   1
  -5  -3  -4 11163.8 2529.01  33
  -5   3  -4 4632.40 1257.79  36
  -5  -3  -4 8882.08 2223.25  39
  -5   3  -4 3304.41 1381.98  29
   5   3   5 61066.4 3287.43   2
  -5   3  -5 50277.3 3497.07   2
  -5  -3  -5 62399.5 6210.26  39
   5  -3   5 60231.2 3752.77   1
  -5   3  -5 60804.6 3878.80  38
   5   3   5 49886.5 3705.22  35
  -5  -3  -5 64672.9 6381.77  33
  -5   3  -5 64577.2 5046.76  36
  -5   3  -6 36435.6 4751.31  28
   5  -3   6 33604.8 2995.67   1
  -5   3  -6 31299.5 2793.65   2
   5   3   6 28592.0 2951.86  35
  -5  -3  -6 39722.5 5144.80  33
  -5   3  -6 36462.7 4314.22  36
  -5   3  -6 37160.5 3252.52  38
  -5   3  -7 12270.8 2900.04  28
   5   3   7 7494.34 1661.56  35
  -5   3  -7 9766.48 1713.14  38
  -5  -3  -7 12230.4 2910.71  33
  -5   3  -7 10006.6 2384.50  36
  -5   3  -8 11723.0 3001.26  28
   5   3   8 7737.94 1822.83  35
  -5   3  -8 10339.9 2466.62  37
  -5   3  -8 12879.5 2983.51  36
  -5  -3  -8 12603.9 3076.11  33
  -5   3  -9 8342.05 2460.81  36
   5   3   9 4467.57 1443.05  35
  -5  -3  -9 7837.75 2501.58  33
  -5   3  -9 6002.82 1990.11  37
  -5   3 -10 4167.56 1803.47  37
  -5  -3 -10 1256.17 565.437  33
   5   3  10 1196.55 692.925  35
  -5   3 -10 5295.02 2339.46  36
  -5  -3 -11 2724.08 802.822  27
  -5   3 -11 2758.66 999.812  19
  -5   3 -11 2639.44 876.023  16
  -5   3 -11 2479.68 1087.01  31
  -5   3 -11 1538.82 663.883  14
  -5   3 -12 123.233 652.506  14
  -5   3 -12 1076.94 651.185  19
  -5   3 -12 957.607 554.689  16
  -5  -3 -12 1502.19 739.951  27
  -5   3 -12 1230.04 735.963  31
  -5   3 -13 15619.4 2787.05  19
  -5   3 -13 14885.0 2491.38  16
  -5   3 -13 12664.7 2516.26  31
  -5  -3 -13 16771.5 2315.53  27
  -5   3 -13 12419.9 2483.41  14
  -5   3 -14 1593.90 738.420  13
  -5  -3 -14 2145.23 837.777  27
  -5   3 -14 1923.27 924.828  16
  -5   3 -14 1562.67 819.056  31
  -5   3 -14 1489.10 701.022  14
  -5  -3 -15 8704.86 1729.38  27
  -5   3 -15 9222.18 2130.30  14
  -5   3 -15 9526.47 1995.88  31
  -5   3 -15 7240.74 2031.11  13
  -5   3 -16-82.6521 737.212  13
  -5  -3 -16-292.294 274.113  16
  -5   3 -16-193.962 469.852  14
  -5  -3 -16 476.812 395.991  27
  -5   3 -16-517.905 610.877  31
  -5  -3 -17 16235.0 2097.73  16
  -5   3 -17 16427.9 2428.54  14
  -5  -3 -17 6250.41 1471.25  14
  -5   3 -17 13420.1 2088.01  15
  -5   3 -17 7638.41 1884.43  13
   5  -5 -17 16185.0 2314.80  27
   5  -5 -17 13293.8 1889.05  16
   5   5 -17 21689.9 4133.40  31
   5   5 -17 17067.9 2906.28  13
   5   5 -17 17403.2 2872.77  15
   5   5 -16 5138.16 1960.78  31
   5  -5 -16 3708.00 1069.11  27
   5  -5 -16 3511.94 1158.02  16
   5   5 -16 4706.14 1550.27  13
   5   5 -16 5496.44 1700.70  15
   5   5 -15 8959.83 3007.43  31
   5  -5 -15 9777.89 1837.62  27
   5   5 -15 10769.3 2485.12  15
   5   5 -15 9683.28 2214.52  13
   5   5 -14 7254.65 1765.69  13
   5   5 -14 10340.7 2278.20  15
   5   5 -14 10006.1 3352.12  31
   5  -5 -14 9338.27 1813.75  27
   5  -5 -13 1129.03 622.308  27
   5   5 -13 971.795 594.359  15
   5  -5 -13 1023.59 936.882  17
   5   5 -13 1454.79 833.127  13
   5   5 -13 968.675 723.407  31
   5   5 -12 556.938 451.100  13
   5  -5 -12 686.219 439.914  17
   5   5 -12 848.232 597.376  15
   5  -5 -12 742.409 519.084  27
   5   5 -12 922.269 1245.87  31
   5  -5 -11 13056.6 1932.41  27
   5  -5 -11 10788.2 3361.93  17
   5  -5 -11 16821.3 2397.98  18
   5  -5 -11 19818.9 2519.25  11
   5   5 -11 16885.9 2955.45  15
   5   5 -11 13733.4 2207.72  13
   5   5 -11 22510.5 3391.22  14
   5   5 -11 9296.55 2862.16  31
   5   5 -10 497.819 628.517  14
   5  -5 -10 387.503 362.883  27
   5   5 -10-201.841 1016.54  38
   5   5 -10-52.9792 806.654  31
   5  -5 -10 330.156 1415.94  17
   5   5 -10 550.934 565.322  13
   5   5 -10 132.507 246.697  15
   5   5  -9 54653.9 10134.7  28
   5  -5  -9 40586.5 8934.08  33
   5   5  -8 1938.59 1949.23  28
   5   5  -8 1155.66 583.741  38
   5  -5  -8 336.672 1072.50  39
   5  -5  -8 41.4599 863.160  33
   5  -5  -7 103050. 13472.5  33
   5  -5  -7 108866. 14138.1  39
   5   5  -7 139779. 11701.3  38
   5  -5  -6 596.514 914.410  39
   5  -5  -6 1718.33 1826.10  33
   5   5  -6 358.198 201.465   2
   5  -5  -5 17482.7 5691.25  39
   5   5  -5 12964.8 1800.11   2
   5  -5  -5 20305.4 5628.93  33
  -5   5   5 14817.1 1951.41   2
   5   5  -4 6972.46 1266.78   2
  -5   5   4 9286.94 1556.34   2
  -5   5   3 45886.9 3501.10   2
   5   5  -3 38424.2 2969.62   2
   5   5  -2 16964.8 1932.21   2
  -5   5   2 19449.7 2295.36   2
   5  -5  -2 25246.9 7214.21  34
  -5   5   1 95931.3 5234.09   2
   5   5  -1 84210.1 4300.78   2
  -5   5   0 25629.2 2731.19   2
   5   5   0 29732.6 2523.68  35
   5   5   0 21011.0 2088.01   2
   5   5   1 145850. 5645.04  35
  -5   5  -1 119052. 6017.43   2
   5   5   1 104867. 4638.71   2
  -5  -5  -1 135699. 14007.3  34
  -5   5  -2 40675.4 3600.45   2
   5   5   2 34958.7 2702.55   2
   5   5   2 47390.6 3287.14  35
  -5  -5  -2 48095.1 8030.80  34
  -5  -5  -3-176.442 397.896  34
   5   5   3 315.886 281.208   2
  -5   5  -3 187.475 202.009   2
   5   5   3 375.884 393.847  35
   5   5   4 2681.97 760.494   2
  -5  -5  -4 4056.36 2027.72  33
   5   5   4 3654.16 982.415  35
  -5   5  -4 3287.78 1035.48   2
  -5   5  -5 76271.2 6064.80  36
   5   5   5 54403.9 3595.08   2
  -5   5  -5 60344.9 4831.34   2
  -5  -5  -5 79262.5 8902.49  39
   5   5   5 74585.5 4826.28  35
  -5  -5  -5 79226.6 9018.51  33
  -5   5  -6 17939.3 2684.87   2
  -5  -5  -6 24874.4 4975.60  33
  -5   5  -6 27770.5 3987.22  36
  -5  -5  -6 26746.1 5116.60  39
   5   5   6 21957.5 2716.19  35
  -5   5  -7 75633.6 8742.81  28
  -5  -5  -7 62088.9 7989.72  39
  -5   5  -7 67684.3 6989.48  36
   5   5   7 63380.7 4883.07  35
  -5  -5  -7 63556.6 8243.41  33
  -5   5  -8 59010.4 7956.88  28
  -5   5  -8 52447.6 6707.86  36
   5   5   8 47378.6 4505.81  35
  -5  -5  -8 49345.6 7360.03  33
  -5   5  -9 40675.0 4162.48  21
  -5   5  -9 34857.7 5549.65  37
  -5   5  -9 45437.4 6589.80  36
  -5  -5  -9 61435.3 4647.01  18
  -5  -5  -9 54797.5 5783.42  17
  -5   5  -9 48802.8 4512.52  19
  -5  -5  -9 43567.2 3227.98  27
   5   5   9 35244.9 4067.41  35
   5  -5   9 36201.1 3639.95   9
  -5   5  -9 40840.2 4373.36  31
  -5   5 -10 7595.46 1912.85  15
  -5   5 -10 5259.62 1549.03  21
  -5  -5 -10 8426.09 1729.16  18
  -5  -5 -10 7514.30 2123.78  17
  -5  -5 -10 6343.27 1294.21  27
  -5   5 -10 5950.08 1622.13  31
  -5   5 -11 2768.39 1268.03  15
  -5  -5 -11 2063.67 761.458  27
  -5  -5 -11 2172.22 483.136  17
  -5   5 -11 2766.11 1133.33  31
  -5   5 -11 1693.18 895.423  21
  -5  -5 -11 4008.23 1205.17  18
  -5   5 -12 315.841 685.667  21
  -5  -5 -12 161.066 278.609  27
  -5   5 -12-144.685 383.262  15
  -5   5 -12-357.292 243.653  31
  -5   5 -13 5728.57 1795.93  21
  -5   5 -13 4318.33 1378.03  31
  -5  -5 -13 5615.06 1303.99  27
  -5   5 -13 5019.29 1535.89  15
  -5   5 -14 724.241 620.879  31
  -5   5 -14 860.406 724.197  13
  -5  -5 -14 950.059 539.360  27
  -5   5 -14 683.404 450.951  21
  -5   5 -14 1902.28 985.405  15
  -5   5 -15 25746.6 3623.08  13
  -5  -5 -15 36910.6 3329.73  27
  -5   5 -15 40907.5 4065.65  15
  -5   5 -15 27185.6 3128.49  31
  -5   5 -16 1435.03 712.978  13
  -5  -5 -16 1070.56 517.613  27
  -5  -5 -16 2237.07 742.104  16
  -5   5 -16 3451.93 1056.02  15
   5  -7 -16 661.056 435.672  27
   5   7 -16 645.256 1021.93  31
   5  -7 -15 2854.93 966.583  27
   5   7 -15 2568.77 790.615  13
   5   7 -15 2869.27 1221.68  15
   5   7 -15 3732.00 1849.01  31
   5   7 -14-538.937 1283.52  31
   5  -7 -14 19.6665 37.5147  27
   5   7 -14 692.543 870.131  15
   5   7 -13 1593.58 876.242  15
   5  -7 -13-255.443 1534.61  17
   5   7 -13 1769.94 1593.76  31
   5  -7 -13 1690.42 673.249  27
   5  -7 -12 578.230 472.698  27
   5  -7 -12 400.155 32.4376  11
   5  -7 -12 317.444 276.962  18
   5   7 -12 740.240 440.427  15
   5  -7 -12-620.550 1626.58  17
   5   7 -12 494.240 820.971  31
   5   7 -11 1902.28 966.586  15
   5  -7 -11 2013.81 713.149  11
   5   7 -11 1621.35 1039.42  31
   5  -7 -11 1465.10 1155.90  17
   5  -7 -11 1729.93 690.369  27
   5  -7 -11 1035.97 473.330  18
   5  -7 -10 921.413 524.924  18
   5   7 -10 1423.96 957.125  31
   5   7 -10 627.451 597.104  15
   5  -7 -10 1170.07 604.931  27
   5  -7 -10 2033.74 815.745  11
   5  -7 -10 147.199 1202.49  17
   5  -7  -9 1012.13 549.875  27
   5  -7  -9 1093.18 540.810  18
  -5  -7   9 432.499 327.293   9
   5   7  -9 1111.90 610.208  15
   5  -7  -9 711.372 651.154  11
   5   7  -9 458.918 818.641  31
   5  -7  -8 563.094 446.805  27
   5  -7  -8 277.525 151.835  11
  -5  -7   8 435.657 403.052   9
   5   7  -8 127.753 173.392  31
   5   7  -8 889.817 705.694  15
   5  -7  -7 2910.39 874.361  27
   5  -7  -7 4872.71 1376.70  11
   5   7  -7 5319.00 1571.78  15
  -5  -7   7 3691.45 1059.11   9
   5  -7  -7 4202.19 3621.31  39
   5   7  -7 5274.94 2461.14  31
   5  -7  -6-186.551 2130.22  33
   5  -7  -6 306.781 858.919  39
   5   7  -6 120.949 259.163   2
   5  -7  -5 5918.80 4063.13  39
   5   7  -5 4875.15 1348.38   2
   5  -7  -5 5383.06 3031.93  33
  -5   7   4 7026.65 1680.47   2
   5   7  -4 5807.27 1440.76   2
  -5   7   3 48607.7 4593.27   2
   5  -7  -3 49478.1 11524.6  34
   5   7  -3 41939.6 3878.20   2
  -5   7   2 41932.6 4254.59   2
   5  -7  -2 42286.9 10531.9  34
   5   7  -2 36192.3 3517.71   2
   5  -7  -1 88183.5 15229.8  34
  -5   7   1 79595.8 6020.61   2
   5   7  -1 64640.1 4651.75   2
   5  -7   0 9093.60 4275.94  34
  -5  -7   0 7150.82 3499.02  34
  -5   7   0 12760.5 2387.60   2
   5   7   0 9916.00 1749.47   2
  -5   7  -1 2940.46 1163.41   2
  -5  -7  -1 3836.50 2389.70  34
   5   7   1 2217.94 841.308   2
  -5   7  -2-3.32861 390.515   2
   5   7   2-221.059 479.411  35
   5   7   2 44.2338 106.332   2
  -5  -7  -2 611.722 1512.68  34
  -5   7  -3 338.944 544.988   2
   5   7   3 114.228 408.431  35
   5   7   3 3.06303 259.145   2
   5   7   4 16457.2 2465.62  35
   5   7   4 14773.0 2210.77   2
  -5  -7  -4 16253.4 4965.44  33
  -5   7  -4 17178.5 3034.56   2
   5   7   5 12058.4 2146.06  35
  -5   7  -5 15485.9 3189.39  36
  -5  -7  -5 6815.72 3229.94  39
  -5   7  -5 11170.7 2534.35   2
  -5  -7  -5 13458.9 4217.67  33
   5   7   6 11066.8 2015.09  35
   5  -7   6 18010.1 2563.62   9
  -5   7  -6 23019.7 3558.60  31
  -5  -7  -6 10872.2 3986.19  39
  -5   7  -6 16844.0 3680.32  36
  -5   7  -6 10098.0 2001.93  21
  -5  -7  -7 9636.62 1493.64  27
  -5   7  -7 8737.13 1946.42  21
   5  -7   7 7536.00 1705.40   9
  -5   7  -7 11965.5 2560.88  15
  -5  -7  -7 8286.94 1690.18  26
  -5   7  -7 8885.59 2256.35  31
  -5  -7  -8 2228.67 743.893  27
   5  -7   8 1818.55 859.661   9
  -5   7  -8 1883.01 977.595  31
  -5   7  -8 1849.04 922.240  21
  -5   7  -8 2526.59 934.426  15
  -5  -7  -9 6714.73 1352.24  27
  -5   7  -9 6702.97 1862.96  21
   5  -7   9 4848.67 1448.94   9
  -5  -7  -9 7972.98 1793.06  18
  -5   7  -9 8769.12 2289.92  15
  -5   7  -9 6396.51 1870.34  31
  -5  -7  -9 8089.21 2316.89  17
  -5  -7 -10 4433.10 1850.56  17
  -5   7 -10 3966.91 1499.98  15
  -5  -7 -10 3939.67 1065.15  27
  -5  -7 -10 5130.42 1373.80  18
  -5   7 -10 3212.42 1141.58  21
  -5   7 -10 3001.42 1107.21  31
   5  -7  10 3467.14 1241.46   9
  -5  -7 -11 83.0626 279.500  27
   5  -7  11 206.931 271.354   9
  -5   7 -11 308.810 581.866  21
  -5  -7 -11 465.654 535.637  18
  -5  -7 -11 1351.82 919.438  17
  -5   7 -11-152.163 725.578  15
  -5   7 -11 383.183 256.017  31
  -5  -7 -12 1604.26 718.929  27
  -5  -7 -12 1498.54 988.029  17
  -5   7 -12 960.292 701.672  21
  -5   7 -12 1161.55 681.046  15
  -5  -7 -12 2174.81 889.936  18
  -5   7 -12 521.820 298.295  31
  -5  -7 -13 1566.05 723.355  27
  -5   7 -13 1204.94 659.324  13
  -5   7 -13 2473.04 1116.49  15
  -5   7 -13 1229.08 607.841  31
  -5  -7 -14 280.031 222.482  27
  -5   7 -14-150.552 287.560  15
  -5   7 -14-88.8941 380.653  31
  -5   7 -14-163.123 524.129  13
  -5   7 -15 2737.76 1080.51  13
  -5  -7 -15 3257.88 873.271  27
   5  -9 -14 749.301 319.502  27
   5   9 -14 354.584 363.207  31
   5  -9 -13 18.2088 369.667  27
   5   9 -13 118.495 560.063  31
   5  -9 -12-296.425 1374.89  17
   5  -9 -12-26.8368 47.3744  11
   5  -9 -12 472.505 343.215  27
   5   9 -12-523.081 820.118  31
   5  -9 -11 7190.17 1490.06  27
   5  -9 -11 6322.54 1262.04  11
   5  -9 -11 5141.85 1106.38  18
   5   9 -11 7271.72 2567.36  31
   5  -9 -10 7494.05 1489.74  11
   5  -9 -10 7470.15 1441.20  27
   5  -9 -10 5083.12 1138.15  18
  -5  -9  10 9300.88 2036.45   9
   5  -9 -10 1833.60 1265.80  17
   5   9 -10 9222.75 3004.66  31
   5  -9  -9 3865.67 1057.51  27
   5   9  -9 4009.66 2014.01  31
   5  -9  -9 3371.25 1037.12  18
  -5  -9   9 4194.48 1350.02   9
   5  -9  -9 5346.22 1335.39  11
   5  -9  -8-101.509 462.417  18
  -5  -9   8 170.244 280.632   9
   5  -9  -8-0.38611 261.181  27
   5   9  -8-323.154 814.702  31
   5  -9  -8 138.708 120.955  11
   5  -9  -7 13364.6 2314.78  25
   5  -9  -7 16416.5 2497.75  11
  -5  -9   7 14157.3 2474.47   9
   5   9  -7 16260.0 4125.58  31
   5  -9  -6 1344.42 744.180  11
   5  -9  -6 580.822 349.230  25
  -5  -9   6 886.899 557.743   9
   5   9  -6 1023.96 974.309  31
   5  -9  -5 1371.91 702.174  25
   5  -9  -5 918.030 2512.51   3
   5  -9  -5 1890.39 912.930  11
  -5  -9   5 1836.05 752.684   9
   5   9  -5 1918.29 1022.77  31
   5  -9  -4 11294.5 2246.41  11
   5  -9  -4 3894.63 2357.75   3
  -5  -9   4 8292.49 1771.96   9
   5  -9  -4 7445.53 1588.60  24
   5   9  -4 11094.8 3369.39  31
  -5  -9   3 71380.6 4743.01  25
   5  -9  -3 53717.2 9339.41   3
   5  -9  -3 69152.8 4935.16  24
  -5  -9   3 79830.0 5725.69   9
   5  -9  -3 84374.9 6298.00  11
   5   9  -3 102221. 10272.3  31
   5  -9  -2 14159.5 2595.41  11
  -5  -9   2 12109.5 1917.83  25
   5  -9  -2 7096.17 1928.84   3
  -5  -9   2 14675.8 2418.68   9
   5  -9  -2 12574.8 2042.93  24
   5  -9  -1 35167.4 4227.68  11
  -5  -9   1 35363.4 3335.33  25
   5  -9  -1 33353.4 3424.90  24
   5  -9   0 17258.2 2970.74  11
  -5  -9   0 21326.5 2618.18  25
   5  -9   0 22474.5 2730.29  24
   5  -9   0 23385.7 3014.86   9
  -5  -9  -1 8841.17 1665.11   6
  -5  -9  -1 8164.91 1599.11  25
   5  -9   1 8889.44 1721.72  24
   5  -9   1 9282.31 1902.56   9
   5  -9   2 5587.81 1376.29  24
  -5  -9  -2 5116.04 1287.90  25
  -5  -9  -2 5145.91 1327.69   6
  -5  -9  -2 4927.71 2005.70   3
   5  -9   2 5661.38 1517.14   9
   5  -9   3-41.5613 297.281  24
  -5  -9  -3-52.0760 297.252  25
  -5  -9  -3 1018.73 408.474   3
  -5   9  -3 78.6874 439.750  31
   5  -9   3 117.956 353.501   9
  -5  -9  -4 1846.52 831.025  25
  -5  -9  -4 1035.59 429.137   3
   5  -9   4 1614.81 812.907   9
  -5   9  -4 2981.77 1491.61  31
  -5  -9  -5 14583.6 3565.55   3
  -5  -9  -5 19459.8 2733.03  25
   5  -9   5 18837.2 2926.70   9
  -5   9  -5 20765.6 3743.12  31
  -5  -9  -6 11234.5 2120.35  25
  -5   9  -6 10970.8 2343.58  21
   5  -9   6 11083.2 2262.89   9
  -5   9  -6 11816.4 2720.34  31
  -5  -9  -6 10396.2 1938.50  26
  -5   9  -7 64322.2 6222.70  31
  -5  -9  -7 61971.7 5009.27  26
   5  -9   7 66533.8 5740.12   9
  -5  -9  -8 13304.5 2179.27  18
   5  -9   8 15691.4 2754.88   9
  -5  -9  -8 10963.3 2159.96  26
  -5   9  -8 14869.9 2843.88  31
  -5  -9  -9 36255.4 3217.18  27
  -5  -9  -9 23497.5 3934.20  17
  -5  -9  -9 32909.9 3371.89  18
  -5   9  -9 28227.9 3771.06  31
   5  -9   9 30431.1 3854.50   9
   5  -9  10 3761.57 1340.26   9
  -5  -9 -10 3819.63 1011.33  27
  -5   9 -10 2766.91 1059.92  31
  -5  -9 -10 4627.72 1156.76  18
  -5  -9 -10 2667.83 1026.69  17
  -5  -9 -11 1523.50 640.763  18
  -5  -9 -11 1341.59 561.279  27
  -5   9 -11 1214.36 735.279  31
  -5  -9 -11 1315.60 628.209  17
   5  -9  11 1161.47 730.417   9
  -5  -9 -12 63.9268 162.892  27
  -5   9 -12 292.739 320.999  31
   5  -9  12-414.599 478.621   9
  -5  -9 -13 1693.95 598.198  27
   5  11 -11 401.968 408.562  22
   5  11 -11 465.282 645.153  31
   5 -11 -11-373.278 280.469  17
   5  11 -10 4177.44 1512.65  31
  -5 -11  10 4930.70 1216.72   6
  -5 -11   9 283.748 337.991   6
   5  11  -9 41.1699 274.654  31
   5 -11  -8 6164.78 1283.64  11
  -5 -11   8 6671.72 1496.17   6
   5 -11  -8 1352.71 764.390  17
   5  11  -8 6552.67 2041.01  31
   5 -11  -7 2146.50 969.470  25
  -5 -11   7 1751.45 726.587   6
   5 -11  -7 1769.24 724.164  11
   5  11  -7 1099.88 813.211  31
   5  11  -6 4193.13 1914.00  31
   5 -11  -6 3967.77 1296.96  25
   5 -11  -6 4776.42 1320.98  11
   5 -11  -5 360.787 397.601  11
   5  11  -5 138.360 379.268  31
   5 -11  -5 866.976 569.352  25
   5 -11  -4 1983.26 927.150  25
   5 -11  -4 1029.11 974.238   3
  -5 -11   4 2020.32 872.893   6
   5  11  -4 2809.33 1288.25  31
  -5 -11   3 12484.6 2148.48  25
   5 -11  -3 11950.4 2213.96  25
   5 -11  -3 3168.48 1052.81   3
   5  11  -3 11769.0 3248.57  31
  -5 -11   3 10936.0 1942.03   6
  -5 -11   2 10055.1 1882.33   6
  -5 -11   2 9741.88 1894.08  25
   5  11  -2 8844.36 3024.41  31
   5 -11  -2 9572.70 1996.34  25
   5 -11  -2 3426.90 1219.81   3
  -5 -11   1 1941.78 856.944  25
   5 -11  -1 2458.07 976.699  25
  -5 -11   1 2597.32 1012.60   6
   5  11  -1 1055.15 730.108  31
   5 -11  -1 1662.68 683.597   3
  -5 -11   0 8431.99 1797.82  25
   5 -11   0 8762.75 1887.25  25
   5 -11   0 10241.0 2204.63   9
   5 -11   0 1892.58 1013.91   3
  -5 -11   0 1162.68 1038.15   3
  -5 -11   0 9211.17 1855.00   6
   5 -11   1-176.310 327.526  25
  -5 -11  -1 502.570 467.630  25
   5 -11   1 366.600 363.953   9
   5 -11   1-618.566 1904.22   3
  -5  11  -1 370.966 631.158  31
  -5 -11  -1 1633.56 1988.36   3
  -5 -11  -1 1156.04 708.941   6
  -5 -11  -2 793.665 574.812  25
   5 -11   2 608.501 496.898  25
   5 -11   2 587.513 211.552   9
  -5 -11  -2 1271.28 1844.52   3
  -5  11  -2 1225.07 886.591  31
  -5  11  -3-851.978 1104.12  31
  -5 -11  -3-389.120 482.342  25
   5 -11   3 291.809 357.219  25
  -5 -11  -3-299.455 1483.22   3
   5 -11   3-326.779 538.963   9
  -5  11  -4 94.4804 173.520  31
  -5 -11  -4 751.757 470.760  26
   5 -11   4 457.093 341.812  25
   5 -11   4 1082.95 760.939   9
  -5 -11  -5 1576.95 702.642  26
   5 -11   5 1637.08 914.170   9
  -5  11  -5 1947.81 1038.19  31
  -5  11  -6 6368.56 1794.76  31
   5 -11   6 7675.47 1913.10   9
  -5 -11  -6 5188.01 1345.49  26
  -5 -11  -7 2662.37 746.486  18
   5 -11   7 4346.85 1417.34   9
  -5 -11  -7 1771.51 683.197  26
  -5  11  -7 3584.41 1259.59  31
  -5 -11  -8 1894.63 821.177  26
  -5 -11  -8 4209.58 905.656  18
   5 -11   8 6004.94 1628.49   9
  -5 -11  -8 3934.11 1234.34  17
  -5  11  -8 4275.39 1188.74  31
  -5 -11  -9 1185.62 407.649  18
   5 -11   9 2082.64 883.453   9
  -5 -11  -9 2126.13 846.682  17
  -5  11  -9 2047.12 758.966  31
   5 -11  10 1986.49 942.148   9
  -5 -11 -10 691.635 235.446  18
  -5 -13   5-256.760 199.450   3
  -5  13   5 99.7924 96.9750  31
   5  13  -5-13.8433 188.253  31
  -5  13   4 415.922 386.201  31
   5 -13  -4 1060.11 583.005  25
  -5 -13   4 420.775 787.865   3
   5 -13  -4 245.072 222.872  26
  -5 -13   4 340.849 229.464   6
   5  13  -4 33.8398 205.226  31
  -5  13   3 458.465 433.740  31
   5 -13  -3 2461.47 858.742  25
  -5 -13   3 2161.82 796.151   6
  -5 -13   3-665.624 1252.98   3
  -5 -13   3 2544.80 706.996  26
   5  13  -3 614.593 474.096  31
  -5 -13   2 2217.06 778.514   6
   5 -13  -2 2002.10 779.431  25
  -5 -13   2-314.523 520.497   3
   5  13  -2 125.422 351.618  31
  -5 -13   2 2589.53 779.583  26
  -5  13   2 808.997 528.140  31
  -5 -13   1 3478.79 1063.55   6
  -5 -13   1 215.773 326.160   3
   5 -13  -1 4187.23 1147.50  25
   5  13  -1 653.651 492.083  31
  -5 -13   1 4335.96 1024.61  26
  -5  13   1 723.836 636.052  31
   5 -13   0 669.429 479.026  25
   5 -13   0-633.793 632.374   3
  -5 -13   0 398.365 795.816   3
   5  13   0-171.700 77.2337  31
  -5  13   0 170.096 192.986  31
  -5 -13   0 817.360 411.176  26
   5 -13   1 134.041 528.891   3
   5 -13   1 1806.61 741.153  25
   5  13   1 336.290 324.726  31
  -5 -13  -1 3008.46 898.998  26
  -5  13  -1 1515.34 768.029  31
   5 -13   2-386.066 331.397  25
   5 -13   2 241.096 194.086   3
  -5 -13  -2 553.528 382.986  26
   5  13   2-289.237 444.621  31
  -5  13  -2 435.074 408.350  31
   5  13   3 164.633 162.546  31
  -5  13  -3 127.317 132.326  31
  -5 -13  -4 228.438 160.751  26
  -5 -13  -4 299.498 277.719  18
   6   0 -19-332.998 210.200  15
   6   0 -18 14160.8 2334.36  16
   6   0 -18 15632.0 2687.00  14
   6   0 -18 15686.9 3364.44  13
   6   0 -17-291.206 366.544  13
   6   0 -17-23.4056 236.691  14
   6   0 -17 341.682 268.036  16
   6   0 -16 16422.7 2629.90  16
   6   0 -16 15803.9 2651.35  14
   6   0 -16 12276.0 3716.86  31
   6   0 -16 16392.0 3274.18  13
   6   0 -15-172.924 482.027  13
   6   0 -15 685.960 1244.52  31
   6   0 -15-232.960 417.057  14
   6   0 -15 1.11255 399.508  16
   6   0 -14 253.398 250.375  14
   6   0 -14 652.050 202.279  16
   6   0 -14-823.091 1554.07  31
   6   0 -14 644.975 518.099  13
   6   0 -13 81.8186 647.033  31
   6   0 -13 262.487 166.305  16
   6   0 -13 235.034 500.991  13
   6   0 -13-147.723 216.996  14
   6   0 -12 23299.6 4849.71  38
   6   0 -12 12972.0 3127.93  31
   6   0 -12 25382.0 4063.31  40
   6   0 -11 378.743 704.124  38
   6   0 -11 376.473 451.189  40
   6   0 -10 232618. 14807.7  38
   6   0 -10 200826. 9753.90  40
   6   0  -9 161.398 400.907  38
   6   0  -9 464.126 544.153  33
   6   0  -9-36.3620 121.381  40
   6   0  -8 33680.8 4519.01  38
   6   0  -8 36066.0 4854.30  37
   6   0  -8 40286.5 3669.39  40
   6   0  -8 28941.2 4439.05  33
   6   0  -7-103.847 502.123  33
   6   0  -7 58.3642 116.072  40
   6   0  -7-325.478 408.400  37
   6   0  -7-54.2956 185.373  38
  -6   0   6 4678.96 814.712  41
   6   0  -6 2553.43 1120.27  38
   6   0  -6 5027.84 1152.78  40
   6   0  -6 2092.82 1108.03  37
   6   0  -6 5609.43 1555.94  33
  -6   0   6 3373.50 1262.03  29
   6   0  -6 3811.53 823.276  36
  -6   0   5-65.3802 35.1188  29
  -6   0   5 138.131 186.791  41
   6   0  -5-13.4986 81.9174  40
   6   0  -5-2.66092 75.2534  36
   6   0  -5 207.202 420.472  33
   6   0  -5 55.0427 196.150  37
   6   0  -5 77.2866 102.823  38
   6   0  -4 1903.77 754.930  38
  -6   0   4 9201.49 1770.12  29
   6   0  -4 6669.71 1452.03  37
   6   0  -4 10038.2 1699.12  33
  -6   0   4 4730.78 929.304  41
  -6   0   3 95.9231 208.141  41
   6   0  -3-91.5130 168.113  33
  -6   0   3 62.9635 121.963  29
   6   0  -3-162.666 203.034  37
   6   0  -3-51.5038 216.627  38
  -6   0   2 207201. 5501.59  29
   6   0  -2 200411. 4910.03  37
  -6   0   1 65.1060 70.0418  36
   6   0  -1-50.8428 76.9603  37
  -6   0   1 26.5546 66.6175  29
   6   0  -1 2.81952 47.7283  38
  -6   0   0 138759. 3988.54  36
  -6   0  -1-100.904 124.211  36
  -6   0  -1 131.345 172.086  41
  -6   0  -2 421754. 6944.40  33
  -6   0  -2 396693. 6765.10  37
   6   0   2 407211. 7558.97  29
   6   0   3 325.235 334.959  29
  -6   0  -3-38.6872 131.437  41
  -6   0  -3 60.5666 105.342  38
  -6   0  -3-69.4547 106.552  37
  -6   0  -3-443.114 378.908  33
  -6   0  -4 183916. 4349.77  41
  -6   0  -4 158307. 6000.36  37
  -6   0  -4 241001. 8813.89  36
  -6   0  -4 214807. 5941.58  38
   6   0   4 167661. 6945.95  29
  -6   0  -4 169079. 6223.84  33
  -6   0  -5 11.4035 50.9154  37
   6   0   5-208.072 121.515  29
  -6   0  -5-67.2404 294.883  33
  -6   0  -5-121.108 286.445  36
  -6   0  -5 187.231 224.271  38
   6   0   5-6.88161 149.860   1
  -6   0  -6 292801. 10271.4  33
   6   0   6 280680. 11507.3  29
   6   0   6 209156. 8837.56   1
  -6   0  -6 378408. 13191.4  36
  -6   0  -6 340127. 9032.92  38
   6   0   7 58.1864 211.056   1
  -6   0  -7-97.6377 591.018  36
  -6   0  -7 281.841 361.746  38
   6   0   8 39718.9 4125.38   1
  -6   0  -8 48276.2 5519.17  36
   6   0   9 105.877 186.141   1
  -6   0  -9-479.646 589.384  36
  -6   0 -10 1446.42 1045.71  36
   6   0  10 1953.64 899.489   1
  -6   0 -11 524.471 968.901  36
  -6   0 -12 56907.5 5047.30  19
  -6   0 -12 50927.1 4861.81  31
  -6   0 -12 62630.4 4974.18  16
  -6   0 -13-387.004 821.658  31
  -6   0 -13-282.154 40.8730  19
  -6   0 -13-72.6953 350.396  16
  -6   0 -13 155.278 403.495  13
  -6   0 -14 29897.2 4025.41  13
  -6   0 -14 42335.1 4488.39  31
  -6   0 -15-226.976 421.138  16
  -6   0 -15-1104.55 758.392  13
  -6   0 -16 8521.09 1881.74  14
  -6   0 -16 16875.7 2362.44  16
  -6   0 -17 447.483 400.045  16
  -6   0 -17-551.966 457.178  14
  -6   0 -18 822.399 588.043  14
   6   2 -19-4.14594 81.1543  13
   6   2 -18 18149.9 3344.51  13
   6   2 -18 15289.5 3761.61  31
   6  -2 -18 13807.3 2139.65  16
   6   2 -18 13562.7 2636.73  15
   6  -2 -18 14883.3 2367.15  14
   6   2 -17 444.724 108.825  13
   6   2 -17 205.842 227.527  14
   6  -2 -17-40.1669 371.414  14
   6  -2 -17 136.516 91.0571  16
   6   2 -17 330.084 1002.26  31
   6  -2 -16 2363.81 1039.33  13
   6   2 -16 1590.59 694.000  14
   6  -2 -16 1529.60 799.331  16
   6  -2 -16 1777.38 918.779  14
   6   2 -16 1294.23 518.244  16
   6   2 -16 2446.19 1305.59  13
   6   2 -16 1630.45 1080.59  31
   6  -2 -15 1452.05 1228.69  13
   6   2 -15 501.751 515.809  13
   6  -2 -15 602.106 316.277  14
   6  -2 -15 1038.71 679.433  16
   6   2 -15 703.525 108.290  16
   6   2 -15 391.133 370.124  14
   6   2 -15 291.258 857.336  31
   6  -2 -14 17274.3 3213.87  13
   6   2 -14 15158.1 2583.23  16
   6   2 -14 16811.8 2788.82  14
   6   2 -14 12958.2 2553.40  13
   6  -2 -14 5377.05 2936.97  31
   6   2 -14 6943.30 2573.40  31
   6  -2 -14 17816.5 2712.78  16
   6   2 -13 2507.48 990.929  13
   6  -2 -13 819.959 1151.91  31
   6  -2 -13 3000.25 1162.39  13
   6   2 -13 2588.65 936.884  14
   6   2 -13 3308.66 1142.88  16
   6   2 -13 1200.07 1071.89  31
   6  -2 -12 27830.4 5164.64  31
   6  -2 -12 61249.8 5312.49  13
   6   2 -12 65418.4 4648.85  16
   6   2 -12 34611.3 5344.86  31
   6   2 -12 69131.4 4947.36  14
   6   2 -12 52768.5 4481.03  13
   6   2 -11 6988.68 1899.37  40
   6  -2 -11 4376.43 2801.62  33
   6   2 -11 4147.27 2081.62  37
   6   2 -11 6896.61 2485.03  38
   6  -2 -10 65360.8 9147.40  33
   6  -2 -10 88360.1 6844.63  40
   6   2 -10 59895.4 8045.34  37
   6   2 -10 91854.0 9118.61  38
   6   2 -10 80282.0 5991.91  40
   6  -2  -9 16451.2 2691.04  40
   6   2  -9 15032.5 2329.55  40
   6   2  -9 16851.5 3578.57  38
   6   2  -9 13016.1 3439.90  37
   6  -2  -9 14009.6 4028.45  33
   6   2  -8 12322.3 3422.57  28
   6   2  -8 10782.2 1855.14  40
   6  -2  -8 11048.8 2018.76  40
   6  -2  -8 8451.03 2671.57  33
   6   2  -8 8917.11 2366.37  38
   6   2  -8 10733.4 2856.84  37
   6  -2  -7 13150.5 3337.20  33
   6  -2  -7 10224.3 1786.70  40
   6   2  -7 9525.42 1602.67  40
   6   2  -7 11368.8 3200.02  28
   6   2  -7 8045.14 2152.92  38
  -6   2   6 47718.9 3546.37  41
   6  -2  -6 36582.8 3148.50  40
   6  -2  -6 50398.1 6017.95  33
   6   2  -6 35125.5 3302.12  36
   6   2  -6 45534.6 5526.84  28
   6   2  -6 47020.5 2659.94   2
  -6  -2   6 44810.3 2118.08  41
   6   2  -6 39004.1 3054.73  40
   6   2  -5 125984. 8678.28  29
   6   2  -5 123755. 8508.21  28
   6  -2  -5 99388.7 8034.49  39
  -6   2   5 93163.1 3188.09   2
   6   2  -5 99053.8 3604.25   2
   6  -2  -5 108315. 8154.49  33
   6   2  -5 47169.5 4453.93  38
   6  -2  -5 93708.1 4536.35  40
  -6   2   5 72207.9 7922.14  30
   6   2  -5 97853.5 4451.14  40
  -6   2   5 77576.0 2033.02  35
   6   2  -5 52152.8 3580.87  36
  -6  -2   5 91778.4 3044.72  41
  -6   2   4 193148. 5171.46   2
   6   2  -4 233769. 10836.2  29
   6  -2  -4 168204. 5590.21  40
  -6  -2   4 173343. 4278.52  41
   6  -2  -4 243178. 11556.4  33
   6   2  -4 164550. 4452.22   2
  -6   2   4 146487. 2403.64  35
  -6   2   4 180826. 11879.8  30
   6  -2  -4 225520. 11442.3  39
  -6   2   3 9830.92 2787.78  30
  -6   2   3 8478.41 510.032  35
   6  -2  -3 11481.9 1301.47  40
   6   2  -3 17305.6 2759.46  29
  -6   2   3 13763.2 1386.30   2
   6  -2  -3 14607.5 2701.42  39
   6   2  -3 12188.4 1205.61   2
   6  -2  -3 14394.4 2658.54  33
  -6  -2   3 13212.7 1230.19  41
   6  -2  -2 264648. 13609.3  30
  -6  -2   2 197853. 4779.28  41
   6  -2  -2 173343. 4491.55  40
   6   2  -2 175510. 4476.51   2
   6  -2  -2 263077. 12747.3  34
   6  -2  -1 19846.3 3928.23  34
   6   2  -1 13904.8 1256.43   2
   6  -2  -1 21529.9 4211.76  30
   6   2  -1 14627.9 1150.03  35
   6   2   0 46107.2 2284.39   2
   6  -2   0 51154.5 2202.07   1
   6   2   0 48388.1 2327.19  35
   6   2   1 485484. 7564.22   2
   6  -2   1 478109. 7506.56   1
  -6  -2  -1 456732. 14616.5  34
  -6  -2  -1 449158. 7151.51  41
   6   2   2 37504.2 2194.75   2
  -6   2  -2 41857.2 2835.93  36
  -6  -2  -2 43323.7 3139.03  36
   6  -2   2 44119.4 2542.08   1
  -6  -2  -3 3681.15 1146.73  39
   6  -2   3 3307.14 742.103   1
  -6   2  -3 2575.51 908.704  29
  -6   2  -3 3293.56 649.922  38
  -6   2  -3 2990.36 856.723  36
  -6  -2  -3 3400.42 1008.88  36
  -6  -2  -3 3059.85 621.477  41
  -6  -2  -3 4003.64 1156.80  33
   6   2   3 3498.32 722.734   2
   6   2   4 197875. 12644.6  30
  -6  -2  -4 241161. 9656.33  33
  -6  -2  -4 257664. 9713.77  36
   6  -2   4 253278. 7195.10   1
  -6   2  -4 225946. 5982.75  38
  -6   2  -4 234265. 9396.19  29
  -6   2  -4 237697. 9477.36  28
  -6  -2  -4 223911. 9296.86  39
  -6   2  -4 233365. 8786.05  36
  -6   2  -4 204975. 5143.91  41
   6   2   5 3583.72 1661.65  30
   6  -2   5 2630.34 786.495   1
  -6  -2  -5 3163.31 1276.52  36
  -6   2  -5 1264.15 534.081   2
  -6   2  -5 2480.15 1007.55  28
  -6   2  -5 1697.62 804.161  36
  -6   2  -5 1649.88 537.811  38
  -6  -2  -5 2670.20 1012.22  33
  -6   2  -6 170555. 9097.96  28
  -6  -2  -6 175738. 9206.31  36
  -6   2  -6 181558. 9295.90  36
   6  -2   6 183216. 7143.26   1
  -6   2  -6 152353. 5929.75  38
  -6   2  -6 147769. 7526.31  37
  -6  -2  -6 180053. 9331.65  33
  -6   2  -6 149575. 5913.49   2
  -6   2  -7 34052.1 4397.14  28
  -6   2  -7 36396.5 4442.06  36
  -6   2  -7 31033.1 2901.16  38
  -6   2  -7 31596.1 3745.95  37
  -6  -2  -7 29153.4 4013.77  36
   6  -2   7 33214.2 3257.39   1
  -6  -2  -7 34589.3 4291.93  33
  -6   2  -8 827.758 692.459  36
  -6  -2  -8 847.226 677.342  36
  -6   2  -8 976.073 710.997  37
  -6  -2  -8 1131.86 688.491  33
   6  -2   8 901.793 557.679   1
  -6   2  -9 5789.14 1832.68  37
   6   2   9 1003.53 899.895   1
  -6  -2  -9 6223.54 2144.18  33
  -6   2  -9 7011.98 2114.70  36
  -6  -2  -9 4788.06 2010.66  36
   6  -2   9 5551.80 1473.02   1
  -6  -2 -10 13820.7 3203.66  36
  -6   2 -10 17253.4 3350.54  37
  -6   2 -10 20480.6 4221.98  36
  -6  -2 -10 12435.9 2947.46  33
   6  -2  10 12568.0 2305.34   1
  -6   2 -11 1130.88 510.128  31
  -6  -2 -11 615.350 339.500  27
  -6  -2 -11 951.737 781.755  31
  -6   2 -11 587.732 553.391  19
  -6   2 -11 345.931 277.196  16
  -6  -2 -12 105205. 5669.23  27
  -6   2 -12 97152.5 6921.96  19
  -6   2 -12 109694. 6452.44  16
  -6  -2 -13 1124.91 659.156  27
  -6   2 -13 340.532 427.840  16
  -6   2 -13 2056.52 1105.51  19
  -6   2 -13 842.172 480.028  31
  -6  -2 -14 64618.6 4743.45  27
  -6   2 -14 46804.6 4842.88  14
  -6   2 -14 59401.7 5428.75  19
  -6   2 -14 70685.7 5294.74  16
  -6   2 -14 51247.0 4767.42  31
  -6   2 -14 47968.8 5260.85  13
  -6   2 -15 2148.49 905.513  13
  -6  -2 -15 1875.77 825.263  27
  -6   2 -15 1789.44 847.318  31
  -6   2 -15 2072.15 957.016  14
  -6  -2 -15 3585.34 1142.63  16
  -6   2 -15 2589.30 862.478  16
  -6   2 -16 744.033 539.609  13
  -6  -2 -16 2478.61 880.494  16
  -6   2 -16 2492.84 1122.77  14
  -6   2 -17-39.4665 220.001  13
  -6  -2 -17-561.075 539.618  14
  -6  -2 -17 56.6498 258.975  16
   6   4 -18 24176.2 3241.02  15
   6   4 -18 28937.2 4832.98  31
   6   4 -18 29795.8 4010.11  13
   6   4 -17 508.674 400.470  13
   6   4 -17 820.562 452.356  15
   6  -4 -17 725.080 388.882  27
   6  -4 -17 273.698 324.228  16
   6   4 -17 519.646 303.631  31
   6  -4 -16 1647.91 738.771  27
   6   4 -16 620.451 1073.52  31
   6   4 -16 2170.82 1182.98  13
   6  -4 -16 791.186 536.507  16
   6   4 -16 1896.22 966.804  15
   6   4 -15 2406.10 1144.72  13
   6  -4 -15 2460.52 888.697  27
   6   4 -15 1779.95 926.637  15
   6   4 -15 2579.38 1732.84  31
   6   4 -14 1757.67 735.052  13
   6   4 -14 2184.68 1228.54  14
   6   4 -14 1810.55 967.755  15
   6  -4 -14 1812.78 815.106  27
   6   4 -14 1949.23 1621.66  31
   6   4 -13 2398.03 968.222  13
   6  -4 -13 2354.00 931.095  27
   6   4 -13 1254.99 1227.45  31
   6   4 -13 3436.74 1253.14  14
   6  -4 -12 11949.5 1875.22  27
   6  -4 -12 14214.7 3979.80  17
   6   4 -12 16786.1 2764.85  14
   6   4 -12 12533.0 2190.43  13
   6   4 -12 11266.4 3316.51  31
   6   4 -11 5331.87 1357.93  13
   6  -4 -11 5198.63 1179.91  27
   6  -4 -11 7334.91 2514.53  17
   6   4 -11 3417.02 1112.47  14
   6   4 -11 3897.24 1830.50  31
   6  -4 -10 15831.6 5276.27  33
   6   4 -10 18159.6 4895.84  37
   6   4 -10 17364.7 4330.33  38
   6   4 -10 19142.4 5759.29  28
   6   4  -9 1119.16 1607.73  28
   6   4  -9 755.797 1127.54  38
   6  -4  -9 84.8361 584.287  33
   6   4  -8 25872.8 5976.94  28
   6  -4  -8 18572.2 5358.34  33
   6   4  -8 19336.4 4088.92  38
   6   4  -7 22732.1 5368.52  28
   6  -4  -7 17784.8 4996.31  39
   6  -4  -7 18090.0 2707.90  40
   6  -4  -7 19358.6 5142.69  33
   6   4  -7 13155.1 3221.11  38
   6  -4  -6 2809.56 980.331  40
   6  -4  -6 3146.55 1859.55  33
   6   4  -6 1942.97 630.315   2
   6  -4  -6 3859.11 2124.55  39
  -6   4   5 42374.8 2966.43   2
   6  -4  -5 62266.4 8722.68  33
   6  -4  -5 53181.3 3865.15  40
   6   4  -5 41529.6 2926.38   2
   6  -4  -5 64200.2 9067.12  39
  -6   4   4 44714.2 1939.76  35
  -6   4   4 53938.6 3421.44   2
   6   4  -4 61791.0 3556.70  40
   6  -4  -4 58025.9 3688.27  40
   6   4  -4 49529.0 3075.65   2
  -6   4   3 3092.80 810.596   2
   6   4  -3 2796.10 681.735   2
   6  -4  -3 3696.12 789.606  40
   6  -4  -3 5956.71 2939.23  34
   6   4  -2 43692.4 2744.63   2
  -6   4   2 48321.3 3311.69   2
   6  -4  -2 49438.2 2599.82  40
   6  -4  -1 40674.0 8914.00  30
  -6   4   1 36299.6 2934.49   2
   6   4  -1 40254.7 2649.68  35
   6  -4  -1 42080.3 8587.00  34
   6   4  -1 31018.7 2294.81   2
   6   4   0 9155.29 1289.54  35
   6   4   0 8221.82 1183.91   2
  -6   4   0 6523.10 1280.47   2
  -6  -4  -1 99776.3 10826.8  30
  -6   4  -1 95533.1 5002.56   2
   6   4   1 110446. 4677.13  35
   6   4   1 91271.1 3975.55   2
  -6  -4  -1 95544.5 9848.74  34
  -6  -4  -2 27151.3 4987.36  34
   6   4   2 22235.3 1962.97   2
   6   4   2 27271.5 2464.84  35
  -6   4  -2 22737.9 2507.92   2
   6   4   3 566.026 396.714  35
   6   4   3 370.708 245.998   2
  -6   4  -3 292.396 318.593   2
  -6   4  -4 106344. 5741.05   2
  -6   4  -4 128065. 6730.74  36
   6   4   4 105201. 4494.69   2
   6   4   4 116847. 5660.79  35
  -6  -4  -4 128021. 9588.95  33
  -6  -4  -4 124812. 9374.22  39
  -6   4  -5 63510.5 5222.02  36
  -6   4  -5 53087.7 4157.73   2
  -6   4  -5 61851.7 4219.68  38
   6   4   5 53827.3 4037.17  35
  -6  -4  -5 61796.8 6750.09  33
   6   4   5 52405.6 3384.57   2
  -6  -4  -5 60062.9 6545.56  39
  -6   4  -6 73551.0 7400.90  28
   6   4   6 56715.8 4324.78  35
  -6   4  -6 56516.0 4382.71   2
  -6  -4  -6 69724.2 7246.39  39
  -6  -4  -6 68983.4 7212.39  33
  -6   4  -6 71382.3 6232.67  36
  -6   4  -7 752.776 1014.98  28
  -6   4  -7 1215.37 1002.42  36
   6   4   7 586.931 289.878  35
  -6  -4  -7 1083.61 1132.07  33
  -6   4  -8 15884.0 3623.29  28
   6   4   8 12347.6 2242.52  35
  -6   4  -8 14530.4 3289.49  36
  -6  -4  -8 15717.3 3618.22  33
  -6   4  -9 3731.17 1785.56  36
   6   4   9 1476.77 838.869  35
  -6   4  -9 3319.01 1598.96  37
  -6  -4  -9 833.494 864.277  33
  -6   4  -9 3395.56 1687.44  28
  -6  -4 -10 386.203 345.935  27
  -6   4 -10 593.005 327.630  16
  -6  -4 -10-245.915 274.123  18
  -6   4 -10 352.237 265.736  19
  -6   4 -10 603.304 626.608  31
  -6  -4 -11 673.728 385.948  27
  -6   4 -11 550.262 599.964  16
  -6   4 -11 121.075 378.189  19
  -6  -4 -11 1128.65 391.192  18
  -6   4 -11 714.500 752.701  21
  -6   4 -11 847.863 453.155  31
  -6   4 -12 17325.8 2717.76  31
  -6   4 -12 20391.1 3258.67  21
  -6  -4 -12 26537.7 2819.22  27
  -6   4 -12 24191.9 3477.24  19
  -6  -4 -13 736.541 459.193  27
  -6   4 -13 228.553 124.604  21
  -6   4 -13 807.031 650.513  31
  -6  -4 -14 31744.2 3205.87  27
  -6   4 -14 25087.0 3163.56  31
  -6   4 -14 24404.4 3722.15  13
  -6   4 -15 3294.43 1260.67  13
  -6  -4 -15 3784.88 1031.31  27
  -6   4 -15 5224.27 1342.89  15
  -6  -4 -16 21620.0 2552.57  16
  -6  -4 -16 7710.11 1516.84  27
  -6   4 -16 10944.3 2237.10  13
  -6   4 -16 17091.2 2371.11  15
  -6  -4 -17 2120.50 652.710  16
  -6   4 -17 2266.85 743.709  15
  -6   4 -17 1172.29 661.328  13
  -6  -4 -17 1187.82 506.072  14
   6  -6 -17 497.653 389.607  27
   6   6 -17 1233.56 1128.19  31
   6   6 -17 49.5196 382.089  13
   6   6 -17 20.9569 104.278  15
   6   6 -16 260.273 380.706  13
   6   6 -16 808.631 952.016  31
   6   6 -16 630.676 528.107  15
   6  -6 -16 244.978 151.288  27
   6  -6 -16 566.188 322.983  16
   6   6 -15 1566.01 658.327  13
   6   6 -15 1361.91 1117.72  31
   6   6 -15 1338.23 719.613  15
   6  -6 -15 1626.34 728.828  27
   6  -6 -14 11814.6 2055.78  27
   6   6 -14 9116.23 1974.52  13
   6   6 -14 10682.4 3366.40  31
   6   6 -14 11920.7 2500.39  15
   6  -6 -13 701.856 420.603  27
   6   6 -13 1630.33 855.567  15
   6   6 -13 964.301 1099.60  31
   6   6 -13 1243.88 694.136  13
   6  -6 -13-3.14164 1013.53  17
   6   6 -12 27003.5 3899.06  15
   6  -6 -12 25064.4 2724.32  11
   6   6 -12 21003.8 4737.13  31
   6  -6 -12 13257.6 3953.70  17
   6  -6 -12 21932.0 2705.33  27
   6   6 -12 20802.6 2823.08  13
   6   6 -11 1880.59 1721.29  31
   6  -6 -11 1683.72 736.426  27
   6  -6 -11 2377.76 998.032  11
   6  -6 -11 2332.52 848.137  18
   6  -6 -11 1019.08 587.900  17
   6   6 -11 2221.75 971.604  15
   6  -6 -10 12053.6 1848.47  27
   6   6 -10 17731.5 2821.25  15
   6  -6 -10 11821.2 3608.24  17
   6  -6 -10 14342.4 2082.47  18
   6  -6 -10 19860.5 2633.93  11
   6   6 -10 13781.7 3670.44  31
   6   6  -9 4185.95 1688.52  31
   6   6  -9 9120.00 2049.35  15
   6  -6  -9 9485.65 1851.72  11
   6  -6  -9 3755.43 976.948  27
   6   6  -8 6410.40 3603.35  28
   6  -6  -8-4373.75 3072.64  39
   6   6  -8 3428.26 2113.45  38
   6  -6  -8 5319.64 2943.58  33
   6  -6  -7 5.64952 975.947  39
   6  -6  -7 1348.04 1256.97  33
   6  -6  -6 4034.72 2033.77  39
   6   6  -6 4323.35 1233.48   2
   6  -6  -6 4985.19 3338.28  33
  -6   6   5 11742.6 1987.03   2
   6  -6  -5 11415.8 3970.78  33
   6   6  -5 9744.04 1760.96   2
   6  -6  -5 14607.0 5359.97  39
  -6   6   4 67401.6 4897.53   2
   6   6  -4 57651.1 4194.41   2
   6   6  -3 21150.6 2459.53   2
   6  -6  -3 29694.2 7934.06  34
  -6   6   3 26083.3 3037.47   2
  -6   6   2 82363.2 5504.78   2
   6   6  -2 69711.1 4407.90   2
  -6   6   1 33237.0 3496.99   2
   6  -6  -1 32592.0 8577.05  34
   6   6  -1 25733.0 2636.03   2
   6  -6   0 22728.3 6738.77  34
  -6   6   0 31026.2 3460.60   2
   6   6   0 24997.6 2552.59   2
  -6  -6   0 27372.7 6518.63  34
  -6   6  -1 10245.5 2025.45   2
   6   6   1 8155.33 1449.77   2
   6   6   1 11488.2 1837.85  35
  -6  -6  -1 12965.7 4495.89  34
  -6   6  -2 23216.9 3115.76   2
   6   6   2 17999.8 2208.38   2
   6   6   2 25098.5 2700.93  35
  -6  -6  -2 24743.3 5728.76  34
   6   6   3 1514.12 664.246   2
  -6   6  -3 2593.23 1061.29   2
   6   6   3 2679.70 856.375  35
  -6   6  -4 77919.6 6076.01   2
   6   6   4 65741.8 4288.76   2
   6   6   4 85149.3 5433.02  35
  -6  -6  -4 89402.1 10092.8  33
  -6   6  -5 10300.9 2210.73   2
  -6  -6  -5 6867.62 2807.54  33
  -6  -6  -5 6235.60 2601.58  39
   6   6   5 10685.9 2006.00  35
  -6   6  -5 12025.5 2581.75  36
  -6   6  -6 37380.6 4434.55   2
  -6  -6  -6 35477.1 6229.97  39
  -6   6  -6 43824.8 5353.42  36
  -6  -6  -6 35370.4 6166.83  33
   6   6   6 37223.5 3893.10  35
  -6   6  -7 16826.3 4371.88  28
  -6   6  -7 13860.2 3352.68  36
   6   6   7 12939.9 2408.38  35
  -6  -6  -7 13220.6 3866.92  33
  -6  -6  -7 11910.9 3520.55  39
  -6  -6  -8 626.220 526.734  18
  -6  -6  -8 768.105 413.342  27
  -6   6  -8 366.710 422.361  21
   6  -6   8 660.574 414.206   9
  -6   6  -8 1690.41 921.735  15
  -6   6  -8 656.913 684.227  31
  -6  -6  -9 13947.3 1888.64  27
  -6   6  -9 15077.4 2768.14  15
  -6  -6  -9 14717.1 2957.22  17
  -6  -6  -9 18137.7 2560.78  18
  -6   6  -9 11426.0 2342.44  21
   6  -6   9 10843.7 2123.51   9
  -6   6  -9 11125.8 2249.24  31
  -6  -6 -10 1503.88 646.155  27
  -6  -6 -10 2540.71 949.946  18
  -6  -6 -10 1916.56 1092.43  17
  -6   6 -10 2116.01 1036.29  21
   6  -6  10 1237.29 716.830   9
  -6   6 -10 977.402 674.399  15
  -6   6 -10 1391.02 494.853  31
  -6  -6 -11 750.460 532.676  27
  -6   6 -11 517.276 492.729  21
  -6  -6 -11 531.262 317.882  18
  -6  -6 -11 130.482 600.916  17
  -6   6 -11 279.240 378.055  15
  -6   6 -11 861.456 754.810  31
  -6  -6 -12 7633.75 1523.33  27
  -6   6 -12 6549.80 1928.90  21
  -6   6 -12 7832.98 1926.18  15
  -6  -6 -12 9630.15 1804.19  18
  -6   6 -12 5660.69 1557.36  31
  -6  -6 -13 736.280 490.201  27
  -6   6 -13 1165.31 725.907  15
  -6   6 -13 484.338 614.442  21
  -6   6 -13 760.840 529.951  31
  -6  -6 -14 7886.89 1484.88  27
  -6   6 -14 6433.74 1738.36  13
  -6   6 -14 8920.34 1845.94  15
  -6   6 -14 5992.42 1377.55  31
  -6   6 -15 1055.22 654.074  13
  -6  -6 -15 748.529 450.908  27
  -6   6 -15 923.299 396.239  15
  -6   6 -16 2086.58 937.554  13
  -6  -6 -16 1417.25 567.358  27
  -6  -6 -16 2067.94 649.783  16
   6  -8 -15 4704.02 1077.45  27
   6   8 -15 5933.77 2036.36  31
   6  -8 -14 2053.80 838.042  27
   6   8 -14 2839.44 1267.66  22
   6   8 -14 2155.87 1414.85  31
   6  -8 -13 9588.63 1740.33  27
   6  -8 -13 5361.80 2117.26  17
   6   8 -13 6916.83 2543.40  31
   6  -8 -12 10200.5 1797.42  27
   6  -8 -12 9744.09 1546.10  11
   6  -8 -12 5041.51 2478.42  17
   6   8 -12 11454.8 3422.99  31
   6   8 -12 10145.1 2362.28  15
   6  -8 -11 1406.76 599.235  17
   6  -8 -11 1532.56 660.054  27
   6  -8 -11 1785.07 745.044  11
   6   8 -11 1892.31 971.891  15
   6  -8 -11 1200.33 544.781  18
   6   8 -11 2091.56 1604.65  31
   6  -8 -10 22132.6 2675.97  11
  -6  -8  10 22284.5 3030.43   9
   6  -8 -10 13448.7 4061.78  17
   6   8 -10 22430.1 3540.77  15
   6  -8 -10 19840.8 2521.35  27
   6   8 -10 20802.8 4724.54  31
   6  -8 -10 16082.3 2185.16  18
   6   8  -9-1.36437 859.034  31
   6  -8  -9 240.584 318.234  11
  -6  -8   9-4.94287 302.602   9
   6  -8  -9 556.104 431.279  27
   6   8  -9 329.420 362.002  15
   6  -8  -8 242.709 91.6446  27
   6  -8  -8 164.176 211.943  11
   6   8  -8 454.860 847.446  31
  -6  -8   8 131.084 172.669   9
   6  -8  -7 9903.28 1597.22  27
   6  -8  -7 16654.4 2547.10  11
  -6  -8   7 11312.7 2072.47   9
   6   8  -7 16074.7 3900.41  31
   6  -8  -6 15130.2 2485.43  11
   6  -8  -6 9708.11 3802.58   3
   6  -8  -6 10001.5 1752.37  24
  -6  -8   6 10710.5 1943.76   9
   6   8  -6 18444.2 4302.28  31
   6  -8  -5 35315.7 3767.08  11
   6  -8  -5 25666.8 2748.04  24
   6  -8  -5 30366.4 7010.94   3
  -6  -8   5 18666.8 2540.48   9
   6   8  -5 38650.1 6129.02  31
  -6   8   4 57126.2 5492.03   2
   6  -8  -4 77726.2 4734.94  24
   6  -8  -4 75331.5 11013.7   3
  -6  -8   4 84277.4 5400.03   9
   6   8  -4 71325.4 8426.16  31
  -6  -8   3 40753.1 3666.65   9
   6   8  -3 28394.0 3537.50   2
  -6   8   3 32723.5 4248.36   2
  -6   8   2 46390.8 5119.21   2
   6   8  -2 44123.0 4388.39   2
   6  -8  -2 51824.8 11713.2  34
   6  -8  -1 6144.31 3744.11  34
   6   8  -1 5989.79 1528.21   2
  -6  -8   1 6345.96 3233.13  34
  -6   8   1 7816.78 2083.19   2
   6  -8   0 7423.15 3602.44  34
  -6  -8   0 6393.12 3530.09  34
   6   8   0 6815.46 1668.05   2
  -6   8   0 8391.56 2152.50   2
   6   8   1 5594.78 1434.59   2
  -6  -8  -1 6108.82 3941.06  34
   6  -8   1 4494.90 2658.07  34
  -6   8  -1 8558.39 2275.97   2
  -6  -8  -2 945.330 1521.94  34
  -6  -8  -2 1410.34 668.118  25
   6   8   2 665.458 483.242   2
  -6  -8  -3 11105.3 1583.25  11
  -6  -8  -3 8603.62 1592.43  25
  -6  -8  -3 9373.00 3021.78   3
   6  -8   3 9330.54 1817.68   9
   6  -8   3 8215.41 1555.62  24
  -6   8  -3 11750.6 2632.45  31
  -6   8  -4 11419.4 2564.31  31
  -6   8  -4 9825.34 2031.25  21
   6  -8   4 10262.4 2015.66   9
  -6  -8  -4 10746.4 1865.78  25
  -6  -8  -4 11497.9 1530.26  11
  -6  -8  -4 12451.9 3292.41   3
  -6  -8  -5 25034.3 2956.41  25
  -6  -8  -5 20875.1 4402.04   3
  -6   8  -5 25561.9 3769.49  31
  -6   8  -5 22903.4 3188.17  21
   6  -8   5 22978.6 3128.15   9
  -6  -8  -6 25746.3 3101.73  25
  -6   8  -6 25120.1 3504.27  21
   6  -8   6 25152.5 3361.25   9
  -6  -8  -6 25010.1 2924.73  26
  -6   8  -6 26649.6 3790.64  31
   6  -8   7 2314.48 1009.24   9
  -6  -8  -7 2973.94 1078.61  26
  -6   8  -7 2507.83 1138.61  21
  -6   8  -7 3325.11 1330.38  31
  -6  -8  -8 17397.5 2198.72  27
  -6   8  -8 14856.6 2755.35  31
  -6  -8  -8 11214.5 2190.43  26
  -6   8  -8 15413.5 2858.18  21
   6  -8   8 14511.4 2623.26   9
  -6   8  -8 19840.9 3231.99  15
  -6  -8  -9 197.205 239.275  27
  -6  -8  -9 706.038 637.075  17
   6  -8   9-0.62957 415.804   9
  -6   8  -9 449.398 527.906  15
  -6   8  -9 558.875 485.580  21
  -6  -8  -9 405.040 474.377  18
  -6   8  -9-493.068 711.463  31
  -6  -8 -10 840.660 546.740  27
   6  -8  10 277.996 532.364   9
  -6  -8 -10 391.991 437.025  18
  -6   8 -10-251.596 383.690  21
  -6   8 -10 643.441 256.933  15
  -6   8 -10-216.667 90.2099  31
  -6  -8 -11 204.537 239.799  27
  -6  -8 -11 249.134 280.425  18
  -6  -8 -11 1135.51 777.971  17
  -6   8 -11 392.129 434.005  21
   6  -8  11 480.935 590.645   9
  -6   8 -11 622.861 284.624  15
  -6   8 -11-71.0073 192.262  31
  -6   8 -12 1660.58 891.279  13
  -6  -8 -12 1297.44 579.849  27
   6  -8  12 956.206 606.418   9
  -6   8 -12 1232.65 764.526  31
  -6  -8 -13 881.626 435.337  27
  -6   8 -13 406.713 322.541  13
  -6   8 -14 1453.52 645.025  13
  -6  -8 -14 1394.17 580.213  27
   6  10 -13 1486.09 941.648  31
   6 -10 -12 6664.74 1270.34  27
   6 -10 -12 6011.80 989.414  11
   6  10 -12 7703.60 1717.72  22
   6 -10 -12 2641.60 1196.05  17
   6  10 -12 6427.85 1926.27  31
   6 -10 -11 4558.88 975.908  11
  -6 -10  11 4495.13 1179.72   6
   6  10 -11 4235.04 1606.45  31
   6 -10 -11 4492.95 1087.11  27
  -6 -10  10 6172.61 1428.98   6
   6 -10 -10 5712.42 1228.43  27
   6 -10 -10 5894.11 1218.63  11
   6 -10 -10 2651.17 1182.06  17
   6  10 -10 7712.58 2528.81  31
   6 -10  -9 5783.20 1302.42  11
   6 -10  -9 2603.73 786.285  17
   6  10  -9 5982.84 2111.58  31
   6  10  -8 564.209 465.499  31
   6 -10  -8 152.144 182.589  11
   6 -10  -7-239.285 411.111  25
   6  10  -7-1109.07 1245.16  31
   6 -10  -7 91.4846 241.206  11
   6 -10  -6 5904.79 1492.36  11
   6 -10  -6 4819.35 1412.41  25
   6  10  -6 5814.76 2248.19  31
   6 -10  -5 1187.24 680.741  11
   6 -10  -5 1159.50 1996.35   3
   6 -10  -5 439.517 465.922  25
   6  10  -5-65.0089 1139.36  31
   6 -10  -4 4817.64 2564.92   3
   6 -10  -4 6013.50 1532.28  25
   6 -10  -4 8270.40 1950.44  11
   6  10  -4 9484.64 3080.84  31
   6  10  -3 23979.6 4817.81  31
  -6 -10   3 20966.0 2736.02  25
   6 -10  -3 10477.3 3772.13   3
   6 -10  -3 20690.4 2851.12  24
   6 -10  -3 17987.0 2929.62  11
  -6 -10   2 31240.6 3373.33  25
   6 -10  -2 29384.8 3964.36  11
   6 -10  -2 34004.1 3649.93  24
  -6 -10   2 31546.6 3278.92   6
   6  10  -2 40466.0 6173.30  31
  -6 -10   1 25054.4 2996.72  25
   6 -10  -1 24907.4 3112.37  24
  -6 -10   1 22845.0 2854.01   6
   6 -10   0 5033.16 1389.47  24
   6 -10   0 6234.19 1664.49   9
  -6 -10   0 4967.81 1301.23  25
  -6 -10   0 6248.72 1478.99   6
   6 -10   1 6912.18 1617.40  24
  -6 -10  -1 3017.42 1406.37   3
   6 -10   1 6644.40 1718.84   9
  -6 -10  -1 6481.56 1556.42  25
  -6 -10  -1 6905.90 1620.10   6
  -6  10  -2-13.2254 521.618  31
  -6 -10  -2 24.3506 196.527  25
   6 -10   2-70.9128 42.7759  24
  -6 -10  -2 223.059 257.900   6
   6 -10   2 92.0182 231.339   9
  -6 -10  -2 949.467 920.613   3
  -6 -10  -3 285.954 1362.22   3
  -6 -10  -3 728.716 567.323  25
   6 -10   3 624.547 465.357   9
   6 -10   3 417.062 384.550  24
  -6  10  -3 997.425 943.461  31
  -6 -10  -4 841.284 649.990   3
  -6  10  -4 1195.17 779.637  31
   6 -10   4 2095.81 1014.67   9
  -6 -10  -4 1357.58 745.084  25
  -6 -10  -5 4635.98 1279.31  26
   6 -10   5 4822.04 1478.01   9
  -6  10  -5 3900.11 1485.72  31
  -6 -10  -6 6308.32 1529.65  26
   6 -10   6 8195.06 1983.64   9
  -6  10  -6 6977.51 1923.95  31
  -6 -10  -7 4803.22 1300.78  26
  -6  10  -7 6377.40 1690.38  31
   6 -10   7 7212.66 1868.38   9
  -6 -10  -8 4274.39 1103.88  18
  -6  10  -8 3744.72 1250.10  31
  -6 -10  -8 1122.21 539.982  26
  -6 -10  -8 2364.95 1095.04  17
   6 -10   8 4169.73 1414.77   9
  -6 -10  -9 487.685 228.709  17
   6 -10   9 2403.74 1079.87   9
  -6 -10  -9 1811.81 573.700  18
  -6  10  -9 1313.67 585.496  31
  -6 -10 -10 379.431 205.524  18
  -6 -10 -10 333.758 560.811  17
   6 -10  10-200.439 360.050   9
  -6  10 -10-155.535 404.634  31
  -6  10 -11-131.457 85.0571  31
   6 -10  11 226.891 399.407   9
  -6 -10 -11 436.222 237.308  18
   6  12  -9 1776.17 748.294  22
   6 -12  -9-305.299 635.976  17
   6  12  -9 812.841 612.357  31
  -6 -12   8 216.030 292.562   6
   6 -12  -8-316.371 614.861  17
   6  12  -8 169.257 318.492  22
   6  12  -8-249.442 600.556  31
  -6 -12   7 544.894 378.691   6
   6  12  -7 77.4418 60.3153  22
   6  12  -7 401.936 175.785  31
   6 -12  -6 4598.91 1269.28  25
  -6 -12   6 4514.48 1196.78   6
   6  12  -6 3818.56 1014.29  22
   6 -12  -6 4310.32 1195.42  26
   6  12  -6 2744.94 1203.41  31
   6 -12  -5 5925.40 1482.56  25
   6  12  -5 3645.32 1574.57  31
  -6 -12   5 5508.82 1333.23   6
   6  12  -5 5033.47 1161.18  22
  -6 -12   4 5336.70 1291.99   6
   6 -12  -4 5364.42 1396.59  25
   6  12  -4 4716.22 1726.27  31
   6 -12  -3 6675.06 1591.05  25
  -6 -12   3 6094.17 1417.35   6
   6  12  -3 4420.28 1618.09  31
   6 -12  -2 7260.55 1655.36  25
  -6 -12   2 6994.11 1560.79   6
  -6 -12   2 2316.73 1706.10   3
   6 -12  -2 1187.58 1143.14   3
   6  12  -2 3455.49 1567.79  31
  -6 -12   1-669.946 1042.05   3
   6 -12  -1 835.096 489.542  25
   6 -12  -1 492.346 1266.63   3
  -6  12   1 227.634 471.469  31
  -6 -12   1 726.495 466.953   6
   6  12  -1 460.438 375.293  31
  -6  12   0-32.4527 158.310  31
   6  12   0 228.917 577.624  31
   6 -12   0 264.097 1099.22   3
  -6 -12   0 939.918 847.721   3
   6 -12   0 397.634 357.216  25
  -6 -12   0 744.183 518.992   6
  -6 -12  -1 1640.79 752.875   6
  -6 -12  -1 2324.67 842.909  26
  -6 -12  -1 1172.80 510.936   3
   6 -12   1 1092.79 1461.19   3
   6 -12   1 1899.19 865.540  25
  -6  12  -1 1181.10 846.648  31
   6  12   1 1166.65 840.153  31
  -6 -12  -2 307.383 405.671  26
   6 -12   2 161.069 311.964  25
   6 -12   2 1385.55 1613.01   3
   6  12   2-21.2946 229.439  31
  -6  12  -2 319.739 396.456  31
  -6 -12  -3 5041.25 1204.10  26
   6 -12   3 5180.90 1340.07  25
   6 -12   3 6310.24 1651.07   9
  -6  12  -3 3050.42 1150.49  31
  -6 -12  -4 2628.38 809.644  26
   6 -12   4 4328.66 1392.86   9
   6 -12   4 1246.10 1532.76   3
  -6  12  -4 887.600 600.417  31
  -6 -12  -5 3163.99 940.395  26
   6 -12   5 5037.27 1449.64   9
   6 -12   5 2647.69 1509.85   3
  -6  12  -5 2134.47 826.486  31
  -6 -12  -6 1584.62 579.810  26
  -6 -12  -6 565.376 317.960  17
  -6 -12  -6 1087.69 281.178  18
   6 -12   6-212.614 486.065   3
   6 -12   6 2587.87 946.882   9
  -6  12  -6 1631.23 718.719  31
  -6 -12  -7 224.397 114.563  18
  -6 -12  -7 128.342 460.386  17
  -6 -12  -7 212.524 260.602  26
   7   1 -19 5228.53 1352.49  15
   7   1 -19 5110.25 1687.19  13
   7   1 -18 1735.04 1050.42  13
   7  -1 -18 1667.56 946.605  14
   7   1 -18 335.995 299.349  14
   7  -1 -18 794.594 597.701  13
   7  -1 -18 1834.01 814.666  16
   7   1 -18 2935.02 1926.54  31
   7   1 -17 165.744 144.138  16
   7  -1 -17 2022.14 1392.66  13
   7   1 -17 13.2108 353.791  13
   7  -1 -17-4.50454 136.539  16
   7   1 -17 1513.67 1321.40  31
   7   1 -17-30.0890 467.347  14
   7  -1 -17 619.818 485.931  14
   7   1 -16-167.333 527.558  13
   7   1 -16-146.539 438.656  16
   7  -1 -16-55.4157 121.966  31
   7  -1 -16-487.574 641.359  14
   7  -1 -16-504.264 629.089  16
   7   1 -16-280.590 789.321  14
   7  -1 -16 31.5040 945.799  13
   7   1 -16 912.148 1019.24  31
   7   1 -15 2093.96 659.101  13
   7  -1 -15 2606.10 1047.09  14
   7  -1 -15 1804.67 1342.39  13
   7  -1 -15 2319.39 929.666  16
   7   1 -15 2428.19 945.747  16
   7   1 -15 1925.50 924.337  14
   7  -1 -15 445.714 223.058  31
   7   1 -15 1273.17 948.318  31
   7   1 -14 586.631 577.395  13
   7   1 -14-216.310 1295.01  31
   7   1 -14 519.407 526.979  16
   7  -1 -14 912.910 511.545  14
   7  -1 -14 417.094 332.141  13
   7  -1 -14 512.432 367.665  16
   7   1 -14 1023.12 628.379  14
   7  -1 -14 513.672 662.795  31
   7   1 -13 10689.6 3215.97  31
   7  -1 -13 20495.7 2613.77  16
   7   1 -13 19875.3 2638.38  16
   7   1 -13 19171.4 2645.49  14
   7  -1 -13 17679.2 2919.21  13
   7   1 -13 17341.6 2784.25  13
   7  -1 -13 13301.3 3585.24  31
   7   1 -12 747.585 519.732  13
   7   1 -12 1004.01 632.809  14
   7  -1 -12-134.736 745.266  40
   7  -1 -12-529.685 598.081  31
   7   1 -12 1186.42 712.467  40
   7   1 -12-344.862 925.313  31
   7   1 -12-488.453 788.164  38
   7   1 -11 32209.9 6204.70  37
   7  -1 -11 22116.2 5438.80  33
   7   1 -11 32909.9 5897.20  38
   7  -1 -11 35528.7 4602.16  40
   7   1 -11 32926.7 4283.19  40
   7  -1 -11 27963.2 5331.66  38
   7   1 -10 4016.09 1705.49  38
   7  -1 -10 4532.38 2359.14  33
   7  -1 -10 5593.40 1653.70  40
   7   1 -10 5330.59 1605.60  40
   7  -1 -10 3761.17 1765.98  38
   7   1 -10 5240.99 2143.15  37
   7   1  -9 856.054 847.721  38
   7   1  -9 1353.24 660.179  40
   7  -1  -9 1724.38 893.271  40
   7  -1  -9 868.891 600.852  38
   7  -1  -9 680.604 996.970  33
   7   1  -9 2035.99 1194.12  37
   7   1  -8 968.966 689.919  37
   7   1  -8 582.388 468.216  38
   7  -1  -8 834.022 630.222  40
   7   1  -8 668.662 473.544  40
   7  -1  -8 563.093 900.235  38
   7  -1  -8 1432.89 972.635  33
   7  -1  -7 114152. 5928.65  40
   7  -1  -7 50299.6 5419.47  38
   7   1  -7 117015. 5904.68  40
   7   1  -7 54578.0 5297.74  38
   7   1  -7 133502. 8633.30  37
   7  -1  -7 126199. 8903.86  33
   7   1  -6 13074.2 2827.53  28
   7   1  -6 12014.5 1765.28  40
   7  -1  -6 15868.2 2863.51  33
   7   1  -6 5228.17 1573.11  38
   7   1  -6 11577.4 2391.18  37
   7  -1  -6 4066.76 1624.78  38
  -7  -1   6 15949.7 1392.32  41
  -7   1   6 9051.60 1566.33  41
   7  -1  -6 11607.1 1788.50  40
   7   1  -5 384713. 13041.9  28
   7  -1  -5 313888. 8395.66  40
  -7  -1   5 382315. 7258.75  41
   7   1  -5 326424. 10805.8  37
   7   1  -5 327076. 5462.07  36
   7   1  -5 344574. 8708.00  40
   7  -1  -5 374485. 12548.7  33
  -7   1   5 290144. 8652.83  41
  -7   1   4 31366.3 2625.70  41
   7   1  -4 31003.6 3252.75  28
   7   1  -4 22904.3 1310.86  36
  -7  -1   4 32155.7 2245.92  41
   7   1  -4 21101.9 2422.23  38
   7  -1  -4 27269.2 2260.88  40
   7  -1  -4 13459.8 2098.79  38
   7  -1  -4 29155.4 3124.79  33
  -7   1   3 447250. 13394.5  30
   7   1  -3 425429. 10617.3  28
   7  -1  -3 427390. 8575.32  40
   7  -1  -3 414407. 10860.4  39
   7  -1  -3 430644. 10725.4  33
  -7   1   3 431568. 9053.36  41
  -7   1   2 10528.6 1945.04  30
   7  -1  -2 11911.5 662.591   1
   7   1  -2 8019.95 1169.86   2
   7  -1  -2 12057.8 1664.83  39
   7   1  -2 4885.59 1087.15  29
   7  -1  -2 2218.38 677.527  38
   7  -1  -2 11491.5 1536.95  33
   7   1  -2 11147.8 777.376  35
   7   1  -1 563.287 230.972  35
   7  -1  -1 211.874 136.398   1
   7   1  -1 228.659 221.976   2
   7   1   0 27259.2 1781.11  35
  -7  -1   0 31563.2 2331.59  36
  -7   1   0 33170.3 1983.66  36
   7  -1   0 28338.5 1762.33   1
  -7  -1  -1 479518. 10235.6  36
   7  -1   1 545262. 8901.19   1
  -7  -1  -1 553416. 8593.62  33
  -7   1  -1 482641. 7631.95  29
  -7   1  -1 497205. 9192.88  41
  -7   1  -1 560669. 9778.48  36
  -7  -1  -1 518983. 7980.12  39
  -7  -1  -1 619140. 9797.42  41
   7   1   2 359078. 12388.6  30
  -7   1  -2 397623. 7947.11  28
  -7   1  -2 357885. 7472.10  41
  -7  -1  -2 292201. 9005.98  36
   7  -1   2 387614. 8358.28   1
  -7  -1  -2 456292. 7970.26  41
  -7   1  -2 379600. 4769.38  38
  -7   1  -2 379798. 9293.13  36
  -7  -1  -2 382738. 8049.48  33
  -7   1  -3 20621.8 2086.15  28
  -7  -1  -3 14569.4 2177.87  36
  -7   1  -3 19816.3 2315.24  36
   7  -1   3 19516.2 2099.54   1
  -7  -1  -3 24576.1 1767.07  41
  -7   1  -3 23783.9 1507.75  38
   7   1   3 19962.7 2862.01  30
  -7   1  -3 18552.9 1705.58  41
  -7  -1  -3 19761.6 2024.93  33
   7   1   4 1515.04 948.556  30
  -7   1  -4 1703.57 664.869  28
   7  -1   4 1701.62 707.607   1
  -7   1  -4 1822.47 493.334  38
  -7  -1  -4 1755.72 665.917  33
  -7  -1  -4 1445.30 757.854  36
  -7   1  -4 2392.15 712.564  37
  -7  -1  -4 1478.26 399.497  41
  -7   1  -4 1846.54 823.395  36
  -7   1  -4 1758.04 526.110  41
  -7  -1  -5 128968. 7532.73  36
   7  -1   5 139974. 6437.32   1
   7   1   5 111686. 7923.57  30
  -7   1  -5 159008. 5312.17  38
  -7   1  -5 124834. 5825.61  37
  -7  -1  -5 139378. 6657.44  33
  -7  -1  -6 322.774 243.684  33
  -7   1  -6 675.149 669.101  36
   7  -1   6 147.097 302.446   1
  -7   1  -6 474.944 364.038  38
  -7   1  -6 428.910 444.799  37
  -7  -1  -6 471.943 599.878  36
  -7   1  -7 60535.8 4825.29  37
   7  -1   7 65743.0 5049.24   1
  -7  -1  -7 67285.5 6330.59  36
  -7  -1  -7 69685.3 5459.73  33
  -7  -1  -8 15291.1 3454.16  36
  -7   1  -8 17318.7 2777.37  37
   7   1   8 8093.66 2210.45   1
  -7  -1  -8 17076.8 2807.62  33
   7  -1   8 17127.8 2647.71   1
  -7   1  -9 23916.1 4242.09  36
   7   1   9 6586.82 2117.30   1
   7  -1   9 14727.0 2598.25   1
  -7  -1  -9 16153.6 3029.82  33
  -7  -1  -9 15331.9 3562.66  36
  -7   1 -10 569.916 799.607  36
  -7  -1 -10 1140.70 893.525  36
   7  -1  10 134.914 135.429   1
  -7  -1 -11 86642.4 4980.65  27
  -7   1 -11 80956.9 6139.07  19
  -7   1 -11 87407.5 5459.94  16
  -7  -1 -12-138.111 170.051  27
  -7   1 -12-528.340 615.840  19
  -7   1 -12-462.640 673.675  16
  -7  -1 -13 40038.2 3680.33  27
  -7   1 -13 53422.8 4461.81  16
  -7   1 -13 41601.5 4537.52  19
  -7   1 -14 1394.22 789.106  13
  -7   1 -14 2058.82 759.724  16
  -7   1 -15 1004.16 216.630  13
  -7   1 -15 3746.77 1083.78  16
  -7   1 -15 2145.79 1197.30  14
  -7   1 -15 1872.13 845.971  19
  -7  -1 -15 3141.46 989.774  16
  -7   1 -16 707.849 537.735  13
  -7  -1 -16 1464.01 679.400  16
  -7   1 -16 1429.44 720.099  14
  -7   1 -16 1042.49 442.329  16
  -7   1 -17 1253.37 766.711  13
  -7  -1 -17 460.379 356.283  14
  -7  -1 -17 1441.59 586.147  16
  -7   1 -17 2311.83 914.073  14
   7   3 -18-315.885 622.686  13
   7   3 -18 404.057 277.711  15
   7   3 -18 16.1906 1290.43  31
   7  -3 -18 258.636 224.385  16
   7  -3 -18 709.769 375.279  14
   7  -3 -17 802.176 582.269  14
   7   3 -17 1314.53 1054.98  13
   7   3 -17 1169.33 412.519  15
   7  -3 -17 1020.13 610.206  16
   7   3 -17-807.691 1611.44  31
   7   3 -16 4906.70 1659.17  13
   7   3 -16 4327.08 1443.81  15
   7  -3 -16 4215.70 1259.88  16
   7   3 -16 6711.65 1935.82  14
   7   3 -16 4809.53 2497.71  31
   7  -3 -16 5191.22 1320.48  14
   7  -3 -15 8322.78 1663.92  14
   7   3 -15 8301.49 2080.10  13
   7  -3 -15 7645.79 1667.74  27
   7   3 -15 11657.8 2471.41  14
   7  -3 -15 9405.08 2017.36  16
   7   3 -15 7927.46 3195.83  31
   7   3 -14 5513.16 1617.87  13
   7   3 -14 6726.89 1746.60  14
   7   3 -14 4073.55 2016.46  31
   7  -3 -14 5440.80 1335.59  27
   7  -3 -13 25426.6 2850.19  27
   7   3 -13 20723.3 4521.79  31
   7   3 -13 24195.1 3245.79  13
   7   3 -13 27352.5 3152.02  16
   7   3 -13 30675.0 3751.37  14
   7   3 -12 24780.3 2876.60  16
   7  -3 -12 21687.9 2459.60  27
   7  -3 -12 23253.1 2597.15  10
   7   3 -12 14783.4 3635.08  31
   7   3 -12 20148.3 2752.98  13
   7   3 -12 19175.5 2747.52  14
   7   3 -11 11194.2 3592.31  38
   7   3 -11 12194.4 4169.92  37
   7  -3 -11 7712.71 3433.85  33
   7   3 -10 41486.7 7090.02  37
   7   3 -10 38064.4 6142.42  38
   7  -3 -10 45797.8 5255.92  40
   7  -3 -10 39452.2 7611.82  33
   7   3  -9 427.351 1242.86  28
   7  -3  -9 1146.52 867.958  40
   7   3  -9 995.630 862.273  38
   7   3  -9 1324.91 1398.86  37
   7  -3  -9 2446.68 1879.58  33
   7   3  -9 705.684 448.181  40
   7   3  -8 647.721 78.8443  28
   7   3  -8 563.741 554.634  38
   7   3  -8 405.740 334.603  40
   7  -3  -8 670.631 581.546  33
   7  -3  -8 398.628 432.336  40
   7   3  -7 61646.8 7753.81  28
   7   3  -7 40870.3 3517.59  40
   7  -3  -7 45320.8 4078.42  40
   7   3  -7 24282.7 4248.98  38
   7  -3  -7 63821.7 8148.29  33
   7   3  -6 153057. 11485.7  28
   7   3  -6 95132.9 5004.02  40
   7   3  -6 70294.0 6578.66  38
   7  -3  -6 113773. 10540.8  39
   7   3  -6 99787.7 4388.31   2
   7  -3  -6 98701.9 5489.64  40
   7   3  -6 60504.4 4805.83  36
   7  -3  -6 121235. 10482.1  33
   7  -3  -5 47247.3 6448.65  39
   7  -3  -5 32041.9 2863.18  40
  -7   3   5 30467.5 2310.71   2
   7   3  -5 34440.2 2862.08  40
  -7  -3   5 37682.9 2509.10  41
   7   3  -5 32010.2 2383.72   2
   7  -3  -5 48012.3 6356.53  33
   7   3  -4 130466. 9566.81  29
  -7  -3   4 80822.3 3493.01  41
  -7   3   4 84408.7 3914.12   2
   7  -3  -4 113488. 9962.55  39
   7  -3  -4 76542.7 3939.99  40
   7   3  -4 76648.2 3534.04   2
   7  -3  -4 111429. 9341.18  33
  -7   3   3 101504. 4430.33   2
  -7  -3   3 97604.8 3794.65  41
   7   3  -3 88751.1 3649.98   2
   7  -3  -3 83930.2 3747.73  40
   7  -3  -2 36561.0 5885.65  34
   7  -3  -2 20676.6 1645.75  40
   7  -3  -2 33027.7 6016.26  30
  -7   3   2 26167.9 2294.43   2
  -7  -3   2 22979.6 1875.68  41
   7   3  -2 22037.9 1815.52   2
   7   3  -2 26211.3 1882.27  35
   7  -3  -1 12654.9 1117.62  40
   7  -3  -1 18208.8 4629.77  30
  -7   3   1 17306.9 1931.03   2
   7   3  -1 15464.6 1464.40  35
   7   3  -1 13338.5 1377.36   2
   7  -3  -1 19967.4 4705.17  34
  -7  -3   1 14253.9 1449.43  41
  -7  -3   0 487.199 272.107  41
   7   3   0 674.855 377.918  35
   7   3   0 518.174 260.958   2
  -7   3   0 427.562 280.866   2
  -7  -3  -1 288747. 14611.4  30
  -7  -3  -1 268190. 6674.64  41
  -7   3  -1 299417. 8575.96   2
   7   3   1 289796. 7251.17  35
   7   3   1 273299. 6347.57   2
  -7  -3  -1 262242. 13028.6  34
  -7  -3  -2 2619.26 1262.04  30
  -7  -3  -2 3214.11 1217.46  34
   7   3   2 2803.72 672.492   2
   7   3   2 2041.14 643.068  35
  -7   3  -2 1298.88 530.665   2
  -7  -3  -2 1813.70 636.715  41
   7  -3   2 1274.71 472.711   1
  -7   3  -3 487371. 14759.3  29
  -7  -3  -3 446524. 14565.9  33
  -7   3  -3 435174. 10883.8   2
   7  -3   3 455046. 9704.44   1
   7   3   3 452263. 8710.00   2
  -7   3  -3 452242. 11047.3  36
  -7  -3  -3 435284. 14127.7  39
   7   3   4 7591.20 1204.65   2
   7   3   4 5256.98 1154.29  35
   7  -3   4 6719.60 1242.96   1
  -7  -3  -4 6965.28 1802.29  39
  -7   3  -4 6953.66 1120.52  38
  -7   3  -4 6789.01 1497.62  36
  -7   3  -4 6467.63 1308.85   2
  -7  -3  -4 8561.00 2014.92  33
  -7   3  -5 210002. 10282.1  28
  -7  -3  -5 193207. 9982.83  39
  -7   3  -5 195293. 9142.42  36
  -7   3  -5 175788. 7208.71   2
  -7  -3  -5 201070. 10190.8  33
   7  -3   5 196877. 7398.34   1
  -7   3  -6 847.123 581.160  28
  -7   3  -6 549.351 263.264   2
   7   3   6 501.258 344.133  35
   7  -3   6 713.609 405.125   1
  -7   3  -6 662.388 267.888  36
  -7  -3  -6 1212.62 717.711  33
  -7   3  -7 6906.83 1992.50  28
  -7  -3  -7 9134.79 2290.95  33
  -7   3  -7 6325.19 1718.06  37
   7  -3   7 5957.58 1510.16   1
   7   3   7 6491.70 1601.16  35
  -7   3  -7 7972.50 2184.19  36
  -7   3  -8 666.839 478.880  28
  -7  -3  -8 1263.44 670.147  33
   7  -3   8 263.287 432.953   1
  -7   3  -8-38.6002 761.650  36
  -7   3  -8 348.158 180.561  37
   7   3   8 319.052 294.939  35
   7   3   9 16364.8 2889.47  35
  -7   3  -9 24303.4 4326.10  36
  -7  -3  -9 16067.7 3327.33  33
  -7  -3 -10 4627.79 1041.71  27
  -7   3 -10 4506.89 1272.97  19
  -7  -3 -10 3413.35 898.281  18
  -7   3 -10 3035.22 1261.72  36
   7   3  10 3009.23 1288.89  35
  -7   3 -11 76391.2 5152.32  16
  -7  -3 -11 73133.1 4458.06  27
  -7   3 -11 67895.5 5745.70  19
  -7  -3 -12 17590.6 2251.85  27
  -7   3 -12 14782.2 2680.42  21
  -7   3 -12 14945.1 2758.58  19
  -7   3 -12 17281.7 2478.79  16
  -7  -3 -13 51610.8 4070.24  27
  -7   3 -13 42368.7 4436.47  14
  -7   3 -13 58732.6 4711.07  16
  -7   3 -13 48949.6 5093.69  19
  -7   3 -14 825.706 611.686  13
  -7  -3 -14 1409.15 657.407  27
  -7   3 -14 1993.07 632.794  16
  -7   3 -14 1080.66 627.281  14
  -7  -3 -15 2534.82 878.335  27
  -7   3 -15 3585.63 1232.83  14
  -7   3 -15 2314.19 1058.14  13
  -7  -3 -15 5676.98 1514.16  16
  -7   3 -16 5322.79 1582.88  13
  -7  -3 -16 6368.53 1361.50  27
  -7   3 -16 10016.9 1790.93  15
  -7   3 -17 1280.72 700.462  13
  -7  -3 -17 938.878 426.182  14
  -7  -3 -17 2497.99 712.921  16
  -7   3 -17 2036.93 625.711  15
   7   5 -18 2384.05 1521.12  31
   7   5 -17-502.170 658.070  13
   7  -5 -17-177.207 217.485  27
   7   5 -17-62.7332 472.294  31
   7   5 -17-110.739 617.324  15
   7   5 -16 3274.65 1180.94  13
   7   5 -16 3977.42 1227.99  15
   7  -5 -16 3445.88 1089.17  27
   7  -5 -16 2325.49 836.126  16
   7   5 -16 3805.01 2027.30  31
   7  -5 -15 15246.7 2385.54  27
   7   5 -15 17902.8 3092.56  15
   7   5 -15 13220.7 2555.09  13
   7   5 -15 14622.0 3878.50  31
   7   5 -14 5061.67 1463.39  13
   7  -5 -14 5074.36 1333.54  27
   7   5 -14 6230.53 1832.50  15
   7   5 -14 6220.58 2547.60  31
   7  -5 -13 4172.15 1658.16  17
   7   5 -13 5694.20 1578.69  13
   7  -5 -13 5469.75 1358.42  27
   7  -5 -13 7272.52 1520.52  11
   7   5 -13 5709.17 2227.30  31
   7   5 -13 8091.93 1924.07  15
   7  -5 -12 1884.69 1198.35  17
   7  -5 -12 4572.65 1225.68  27
   7   5 -12 3613.51 1117.61  13
   7   5 -12 5572.82 1595.76  15
   7  -5 -12 5231.90 1326.44  11
   7   5 -12 3398.23 1901.45  31
   7  -5 -11 2258.05 819.146  27
   7  -5 -11 2210.21 790.447  18
   7  -5 -11 1255.10 904.981  17
   7   5 -11 2553.52 1100.91  15
   7   5 -11 3487.57 1117.92  13
   7   5 -11 3897.25 1874.48  31
   7  -5 -10 26031.5 5072.36  17
   7  -5 -10 18706.9 2225.75  27
   7   5 -10 16136.1 3720.80  31
   7   5 -10 25678.0 3204.77  15
   7   5 -10 17665.0 2254.86  13
   7   5  -9 1151.22 660.261  28
   7  -5  -9 722.339 1161.40  33
   7   5  -9 1416.66 1361.76  38
   7   5  -8-110.314 664.204  28
   7   5  -8 4.48191 1016.27  38
   7  -5  -8 838.542 291.366  33
   7  -5  -7 31184.2 7329.41  39
   7   5  -7 14714.8 4004.13  38
   7  -5  -7 26016.9 6373.94  33
   7   5  -6 609.225 317.088   2
   7  -5  -6 963.277 903.216  39
   7  -5  -6 1192.34 1414.83  33
   7   5  -5 36121.6 3124.79   2
  -7   5   5 39907.7 3415.38   2
   7  -5  -5 57468.8 9669.39  39
   7  -5  -5 52683.5 9004.54  33
  -7   5   4 4186.73 1089.07   2
   7   5  -4 3682.31 920.825   2
   7   5  -3 49823.3 3408.48   2
  -7   5   3 62025.9 4338.68   2
  -7   5   2 2552.31 883.805   2
   7  -5  -2 3102.80 2600.53  34
   7   5  -2 1864.87 658.609   2
   7   5  -1 437.418 219.721   2
  -7   5   1 1008.94 502.365   2
   7   5  -1 1112.66 512.294  35
   7  -5  -1 952.806 1390.73  34
  -7   5   0 537.612 434.667   2
   7   5   0 518.254 321.100   2
   7   5   0 892.211 429.741  35
  -7   5  -1 21468.2 2719.85   2
   7   5   1 22636.4 2349.51  35
   7   5   1 17203.3 1910.95   2
  -7  -5  -1 16637.9 4198.88  34
  -7   5  -2 4186.17 1197.32   2
   7   5   2 5006.66 1152.21  35
   7   5   2 3721.68 890.233   2
  -7  -5  -2 3879.88 1902.94  34
  -7   5  -3 57016.1 4666.10   2
   7   5   3 65456.7 4530.83  35
  -7   5  -4 14955.6 2405.09   2
  -7  -5  -4 11268.5 2981.29  39
   7   5   4 14101.0 1820.55   2
  -7   5  -4 18312.3 2696.85  36
   7   5   4 15907.9 2303.65  35
  -7  -5  -4 13644.2 3327.28  33
  -7  -5  -5 12528.3 3134.90  39
   7   5   5 8430.53 1480.57   2
  -7   5  -5 10895.0 2282.03  36
   7   5   5 12305.2 2129.00  35
  -7  -5  -5 13806.7 3379.56  33
  -7   5  -5 9323.49 1993.78   2
  -7   5  -6 34.6533 160.849   2
   7   5   6 33.0916 93.7283  35
  -7  -5  -6 182.133 676.778  39
  -7   5  -6 254.747 387.162  36
  -7   5  -7 1664.86 1211.78  28
  -7  -5  -7 445.550 427.126  33
  -7   5  -7 1588.47 1160.20  36
   7   5   7 818.125 305.400  35
  -7   5  -8 76.4873 426.697  28
   7   5   8-52.5407 469.144  35
  -7   5  -8 621.904 860.856  36
  -7  -5  -8 488.361 450.213  33
  -7  -5  -9 7189.05 1283.75  27
  -7  -5  -9 9309.28 1651.52  18
   7  -5   9 9639.62 1993.25   9
  -7   5  -9 6401.63 1584.51  19
  -7   5  -9 11930.7 2177.88  15
  -7  -5 -10 1488.17 622.000  27
  -7   5 -10 2416.95 1131.60  15
  -7   5 -10 1175.80 644.715  21
   7  -5  10 1036.77 606.403   9
  -7   5 -10 1237.00 856.851  19
  -7   5 -10 792.866 475.764  31
  -7  -5 -10 2115.35 764.720  18
  -7   5 -11 4159.54 1273.10  15
  -7  -5 -11 4178.05 1082.02  27
  -7   5 -11 3915.60 1457.09  21
  -7  -5 -11 5669.69 1330.66  18
  -7   5 -11 3801.08 1180.03  31
  -7  -5 -12 392.046 353.096  27
  -7   5 -12 886.056 721.506  21
  -7   5 -12 99.9786 278.159  15
  -7   5 -12 45.3456 362.805  31
  -7   5 -13 6082.75 1753.08  21
  -7  -5 -13 10128.5 1752.70  27
  -7   5 -13 9011.40 1963.39  15
  -7   5 -14 405.049 225.562  13
  -7  -5 -14 227.427 275.591  27
  -7   5 -14-169.756 640.635  21
  -7   5 -14 327.806 464.161  15
  -7   5 -15 1953.16 953.736  13
  -7  -5 -15 1979.93 714.053  27
  -7   5 -15 3536.68 1067.91  15
  -7   5 -16 1193.90 566.887  13
  -7   5 -16 2144.34 704.774  15
  -7  -5 -16 2207.22 752.159  16
  -7  -5 -16 893.010 479.503  27
   7  -7 -16 3129.90 1000.37  27
   7   7 -16 2946.17 1261.94  31
   7  -7 -15 21784.2 2667.83  27
   7   7 -15 20080.4 3111.81  15
   7   7 -15 18329.0 3864.43  31
   7  -7 -14 18742.5 2503.24  27
   7   7 -14 19902.1 3211.06  15
   7   7 -14 18789.1 4210.24  31
   7   7 -13 60376.1 5763.80  15
   7  -7 -13 54052.0 4360.58  27
   7   7 -13 48401.9 7131.21  31
   7  -7 -13 56777.0 3965.62  11
   7  -7 -12 3654.34 1121.06  27
   7  -7 -12 3749.36 1048.84  11
   7  -7 -12 1794.40 1689.48  17
   7   7 -12 4066.34 1498.55  15
   7   7 -12 3881.38 2142.59  31
   7  -7 -11 26154.1 3000.04  11
   7  -7 -11 19237.8 2503.93  27
   7  -7 -11 17471.2 4343.30  17
   7   7 -11 24134.2 3568.26  15
   7   7 -11 23171.4 4893.85  31
   7  -7 -10 46.0307 95.3187  27
   7  -7 -10 205.034 343.080  11
   7   7 -10 298.988 392.367  15
   7   7 -10-364.858 1027.95  31
   7  -7 -10-156.139 1186.74  17
   7  -7  -9 5852.92 1287.85  27
   7  -7  -9 9548.52 1864.93  11
  -7  -7   9 7473.73 1618.82   9
   7   7  -9 8820.95 1953.78  15
   7   7  -9 9028.40 2876.67  31
   7  -7  -8 1613.46 665.979  27
   7  -7  -8 2066.08 906.643  11
   7   7  -8 1171.06 934.906  31
   7   7  -8 1767.20 705.954  15
  -7  -7   8 2230.88 874.442   9
   7  -7  -7 18085.1 2108.01  27
  -7  -7   7 23237.7 2719.77   9
   7  -7  -7 28732.7 3308.98  11
   7   7  -7 26015.3 3334.13  15
   7   7  -7 19009.9 4083.44  31
   7  -7  -6 2443.30 2316.10  33
   7  -7  -6 2098.16 2616.26  39
   7   7  -6 1245.41 678.788   2
   7   7  -5 41865.2 4112.46   2
   7  -7  -5 51649.3 11320.5  39
   7  -7  -5 53691.1 10629.4  33
  -7   7   4 13672.2 2477.98   2
   7   7  -4 13319.5 2249.11   2
  -7   7   3 22978.8 3276.20   2
   7   7  -3 17870.5 2527.70   2
   7  -7  -3 23320.2 7096.31  34
   7  -7  -2 28605.8 8133.10  34
  -7   7   2 26510.2 3544.17   2
   7   7  -2 19642.9 2617.51   2
  -7  -7   1 2268.13 878.842  34
   7   7  -1 2872.78 949.832   2
   7  -7  -1 2193.20 977.616  34
  -7   7   1 3968.10 1425.67   2
  -7   7   0 1141.63 607.974   2
   7   7   0 1135.82 612.112   2
  -7  -7   0 445.386 1333.58  34
   7  -7   0-1297.09 1783.94  34
   7   7   1 11139.9 1901.75   2
  -7  -7  -1 8711.93 3457.17  34
  -7   7  -1 14882.5 2793.07   2
   7  -7   1 7917.41 3753.09  34
  -7   7  -2 18023.6 3106.46   2
   7   7   2 17109.5 2530.30  35
   7   7   2 13037.7 2073.52   2
  -7  -7  -2 14692.8 4533.67  34
  -7   7  -3 79304.1 6832.64   2
   7   7   3 60145.7 4482.15   2
   7   7   3 74789.5 5516.72  35
   7   7   4 4459.49 1215.27   2
  -7  -7  -4 1378.64 1359.02  39
   7   7   4 4226.58 1208.67  35
  -7  -7  -4 3729.98 2234.30  33
  -7   7  -4 5972.06 1874.93   2
  -7   7  -5 33533.1 4654.27   2
  -7   7  -5 36963.1 4961.45  36
   7  -7   5 44198.8 4093.83   9
  -7  -7  -5 20704.8 5323.97  39
  -7  -7  -5 34597.7 6429.17  33
   7   7   5 21108.8 2975.27  35
  -7  -7  -6 1779.30 689.352  26
   7  -7   6 1186.11 668.161   9
  -7   7  -6 1970.15 958.145  21
  -7   7  -6 2051.44 992.551  31
  -7  -7  -6 252.890 531.204  39
  -7  -7  -7 508.048 361.782  27
  -7  -7  -7 148.318 31.9153  26
   7  -7   7 540.482 470.303   9
  -7   7  -7 52.4779 444.979  21
  -7   7  -7-436.781 443.713  31
  -7  -7  -8 7945.04 1634.38  18
  -7  -7  -8 7857.92 1423.80  27
  -7  -7  -8 4346.45 1289.38  26
  -7   7  -8 6352.47 1776.48  21
   7  -7   8 6574.71 1700.81   9
  -7   7  -8 6774.80 1775.62  31
  -7  -7  -9 12368.5 1826.65  27
  -7  -7  -9 10631.3 2451.31  17
  -7   7  -9 10330.8 2340.15  21
  -7  -7  -9 13782.6 2207.16  18
   7  -7   9 9286.29 2078.89   9
  -7   7  -9 15540.3 2786.80  15
  -7   7  -9 10353.5 2155.48  31
  -7  -7 -10 8019.46 1481.28  27
  -7  -7 -10 9733.35 1750.50  18
   7  -7  10 6824.37 1791.49   9
  -7   7 -10 8094.29 2092.15  21
  -7  -7 -10 7010.80 1916.06  17
  -7   7 -10 10927.4 2349.82  15
  -7   7 -10 6840.17 1706.47  31
  -7   7 -11 12607.0 2662.46  21
  -7  -7 -11 16372.5 2176.86  27
   7  -7  11 8482.07 1928.20   9
  -7   7 -11 16716.3 2750.87  15
  -7  -7 -11 18537.1 2330.74  18
  -7   7 -11 10897.1 2077.91  31
  -7  -7 -12 3791.04 1061.26  27
  -7   7 -12 3803.86 1437.85  21
  -7   7 -12 5707.61 1519.89  15
  -7   7 -12 3400.62 985.395  31
  -7   7 -13 3154.43 1221.76  13
  -7  -7 -13 3516.01 998.027  27
  -7   7 -13 3271.31 978.662  15
  -7  -7 -14 1236.61 539.469  27
  -7   7 -14 1656.93 714.430  15
  -7   7 -14 937.656 542.194  13
  -7   7 -15-196.964 561.495  13
  -7  -7 -15-174.652 300.338  27
   7  -9 -14 8046.30 1440.23  27
   7   9 -14 10642.5 2524.54  31
   7  -9 -13 8217.49 1527.18  27
   7   9 -13 8426.34 1829.15  22
   7  -9 -13 8683.38 1263.41  11
   7   9 -13 8846.26 2490.16  31
   7  -9 -12 7802.40 1515.94  27
   7  -9 -12 7196.84 1299.89  11
   7  -9 -12 5959.54 2425.50  17
   7   9 -12 7305.85 2469.25  31
   7  -9 -11 2785.35 983.107  27
   7  -9 -11 3967.41 1039.45  11
   7  -9 -11 1226.95 1141.43  17
   7   9 -11 1787.29 1242.32  31
   7  -9 -10-706.120 2008.28  17
   7  -9 -10 139.982 155.204  11
   7  -9 -10 527.979 400.276  27
   7   9 -10-46.5795 1143.95  31
   7  -9  -9-117.616 479.533  11
   7  -9  -9 334.374 300.533  27
   7   9  -9 496.014 495.292  31
   7  -9  -8 343.925 335.282  27
   7  -9  -8 28.1432 269.404  11
   7   9  -8-330.003 1034.65  31
  -7  -9   8 9.38026 349.386   9
   7  -9  -7 7831.60 1755.82  25
  -7  -9   7 8141.90 1845.61   9
   7  -9  -7 8797.89 1871.82  11
   7   9  -7 10694.8 3193.29  31
  -7  -9   6 10252.2 2078.68   9
   7   9  -6 12187.1 3403.44  31
   7  -9  -6 8516.60 1832.64  25
   7  -9  -6 9586.23 2028.30  11
   7  -9  -5 5066.27 1311.81  24
  -7  -9   5 5812.25 1567.01   9
   7  -9  -5 2746.44 2002.89   3
   7   9  -5 7748.88 2709.36  31
   7  -9  -5 6596.06 1713.81  11
   7  -9  -4 18659.0 2996.18  11
   7  -9  -4 9906.18 3340.43   3
   7   9  -4 20840.5 4410.52  31
  -7  -9   4 18481.0 2764.82   9
   7  -9  -4 15856.8 2352.61  24
   7  -9  -3 5636.68 1715.37  11
  -7  -9   3 4495.96 1182.41  25
   7  -9  -3 3533.36 1088.13  24
   7   9  -3 5635.14 2121.77  31
   7  -9  -3 3928.07 2708.16   3
   7  -9  -2 3409.28 1059.73  24
  -7  -9   2 3102.90 984.308  25
   7  -9  -2 1065.19 1037.90   3
   7  -9  -2 2885.14 1161.32  11
   7  -9  -1 2620.48 1179.35  11
  -7  -9   1 2729.13 927.410  25
  -7  -9   1 2619.81 852.856   6
   7  -9  -1 3367.72 1088.73  24
   7  -9   0 335.489 310.734  11
  -7  -9   0 1995.47 782.974  25
  -7  -9   0 2111.08 720.927   6
   7  -9   0 1945.66 804.937  24
   7  -9   0 1983.51 802.106   9
   7  -9   1 1599.46 833.916  24
   7  -9   1 1189.06 676.216   9
  -7  -9  -1 1265.65 614.857  25
  -7  -9  -1 1093.01 521.947   6
  -7  -9  -2 8563.57 1704.18  25
  -7  -9  -2 7647.30 1623.79   6
   7  -9   2 9478.01 1837.40  24
  -7  -9  -2 6837.77 2635.34   3
   7  -9   2 8652.90 1844.31   9
  -7  -9  -3 546.654 478.186  25
   7  -9   3 549.781 286.514  24
   7  -9   3-16.0606 403.622   9
  -7  -9  -3 811.443 134.944   3
  -7   9  -3 277.643 335.000  31
  -7  -9  -4 947.776 569.637  25
  -7  -9  -4 417.910 1488.72   3
  -7   9  -4 1048.52 673.302  31
   7  -9   4 1569.90 887.172   9
   7  -9   5 275.605 446.405   9
  -7  -9  -5 478.655 378.350  26
  -7   9  -5 455.531 503.470  21
  -7   9  -5 887.421 720.236  31
  -7   9  -6 1660.63 847.930  31
  -7   9  -6 1637.94 889.240  21
  -7  -9  -6 1636.08 776.254  26
   7  -9   6 1991.09 1008.17   9
  -7   9  -7-26.5381 388.416  21
   7  -9   7 110.181 169.484   9
  -7  -9  -7 433.407 483.704  26
  -7   9  -7-401.022 599.481  31
  -7   9  -8 1506.58 658.467  31
  -7   9  -8 368.881 501.245  21
  -7  -9  -8 440.445 424.371  18
   7  -9   8 146.854 45.8557   9
  -7  -9  -8 730.595 599.458  26
  -7  -9  -8 215.519 503.846  17
  -7  -9  -9 1181.93 577.634  27
  -7  -9  -9-179.758 613.161  26
   7  -9   9 749.355 533.360   9
  -7  -9  -9 799.636 405.453  18
  -7   9  -9 939.966 574.162  31
  -7  -9  -9-310.574 760.185  17
  -7  -9 -10 2160.43 778.085  27
  -7  -9 -10 1125.54 389.627  18
   7  -9  10 1682.28 839.899   9
  -7  -9 -10 64.2135 499.764  17
  -7   9 -10 1900.28 841.895  31
  -7  -9 -11 1492.08 585.123  27
   7  -9  11 1468.19 782.683   9
  -7  -9 -11 2015.42 606.007  18
  -7   9 -11 1766.33 688.357  31
  -7  -9 -12 1195.50 536.230  27
   7  -9  12 859.644 537.463   9
   7  11 -11 14392.9 2146.72  22
   7  11 -11 9151.68 2046.42  31
  -7 -11  10 709.762 447.396   6
   7  11 -10 320.588 49.2935  22
   7  11 -10 698.224 540.365  31
  -7 -11   9 1342.71 666.650   6
   7 -11  -9 666.781 532.415  17
   7 -11  -9 1748.63 655.712  11
   7  11  -9 1273.31 813.112  31
   7  11  -8 1017.16 828.692  31
   7 -11  -8 1476.12 644.877  11
   7 -11  -8 328.239 119.758  17
  -7 -11   8 1420.66 640.113   6
   7 -11  -7 3646.72 1066.02  11
   7 -11  -7 3641.70 1180.72  25
  -7 -11   7 4456.84 1235.91   6
   7  11  -7 4240.61 1642.63  31
   7  11  -6 8798.02 2539.93  31
  -7 -11   6 7413.30 1555.38   6
   7 -11  -6 7051.18 1587.10  11
   7 -11  -6 5856.17 1536.14  25
   7  11  -5 21528.6 4097.73  31
   7 -11  -5 17837.6 2736.36  11
   7 -11  -5 21634.8 3019.46  25
  -7 -11   5 19355.9 2642.00   6
   7 -11  -4 3440.36 1181.18  11
  -7 -11   4 5171.67 1283.49   6
   7 -11  -4 5267.27 1446.96  25
   7  11  -4 6484.73 2221.40  31
  -7 -11   3 2361.97 957.231  25
   7 -11  -3 2737.61 1036.10  25
  -7 -11   3 2126.13 823.825   6
   7 -11  -3-172.050 1502.25   3
   7  11  -3 1928.68 963.030  31
   7  11  -2 3695.41 1654.89  31
  -7 -11   2 4333.95 1242.69  25
  -7 -11   2 3566.79 1063.68   6
   7 -11  -2 4355.97 1306.23  25
   7 -11  -2 979.099 1312.73   3
  -7 -11   1 656.730 490.846  25
  -7 -11   1 280.009 123.955   6
   7 -11  -1 606.109 491.587  25
   7 -11  -1-26.1001 1315.71   3
  -7 -11   1-234.744 749.253   3
   7  11  -1 177.227 274.420  31
  -7  11   0 931.428 653.430  31
  -7 -11   0 626.630 376.856   6
  -7 -11   0 256.426 124.856  25
   7 -11   0 885.146 1390.46   3
  -7 -11   0-6.98056 940.033   3
  -7 -11  -1 2064.96 1078.03   3
   7 -11   1 1608.72 1939.91   3
   7 -11   1 3121.78 1181.39   9
  -7 -11  -1 2011.11 819.379   6
  -7 -11  -1 2408.51 925.405  25
  -7  11  -1 1970.19 1164.44  31
  -7 -11  -2 2097.48 991.542   6
  -7 -11  -2-8.25782 1145.73   3
   7 -11   2 2571.10 991.171   9
  -7  11  -2 1667.15 918.408  31
  -7  11  -3 4709.27 1563.00  31
   7 -11   3 6670.51 1803.93   9
  -7 -11  -3 2208.12 1421.78   3
  -7 -11  -3 7185.90 1534.10  26
  -7 -11  -4 4267.40 1172.51  26
   7 -11   4 4609.52 1283.88  25
   7 -11   4 4711.84 1454.92   9
  -7  11  -4 3897.45 1311.92  31
   7 -11   5 5342.45 1536.57   9
  -7 -11  -5 4133.24 1162.51  26
  -7  11  -5 3242.10 1109.40  31
  -7  11  -6 1434.90 678.206  31
   7 -11   6 2124.83 969.377   9
  -7 -11  -6 1006.49 636.884  26
  -7 -11  -7 189.963 218.550  26
   7 -11   7 483.815 503.275   9
  -7 -11  -7 112.975 192.983  18
  -7 -11  -7-38.4025 463.152  17
  -7  11  -7 71.0925 109.295  31
  -7 -11  -8 33.8485 125.941  18
   7 -11   8 232.988 124.763   9
  -7 -11  -8 450.801 282.042  17
  -7  11  -8 410.323 366.876  31
  -7 -11  -9 2355.41 528.139  18
   7 -11   9 2394.45 935.507   9
  -7 -11 -10 629.270 251.346  18
  -7 -13   5 313.612 208.558   6
   7 -13  -4 3973.85 1074.09  25
  -7 -13   4 3462.63 963.582   6
  -7 -13   4 885.762 798.245   3
   7  13  -4 1834.60 777.341  31
  -7  13   4 221.718 310.186  31
   7 -13  -3 245.026 229.142  25
   7  13  -3 515.960 444.308  31
  -7  13   3 400.048 366.327  31
  -7 -13   3 517.030 361.549   6
  -7 -13   3-17.6073 659.189   3
  -7  13   2 139.939 406.300  31
  -7 -13   2-374.095 394.075   6
  -7 -13   2 63.9827 224.960  26
   7 -13  -2-157.536 240.139  25
  -7 -13   2 277.827 544.930   3
   7  13  -2-24.2466 143.025  31
  -7 -13   1 562.592 312.091  26
   7 -13  -1 360.166 327.692  25
  -7 -13   1-174.676 373.560   3
  -7  13   1 270.788 257.631  31
  -7 -13   1 230.220 354.493   6
   7  13  -1-470.525 378.291  31
   7  13   0 353.789 373.912  31
   7 -13   0 2037.31 818.503  25
  -7 -13   0 2052.51 656.920  26
   7 -13   1 73.3333 935.962   3
   7 -13   1 407.526 365.492  25
   7  13   1-167.130 258.804  31
  -7  13  -1-146.812 85.2384  31
  -7 -13  -1 515.084 299.157  26
  -7 -13  -2 5475.01 1084.05  26
   7 -13   2 4973.71 1140.52  25
   7 -13   2 1442.71 710.059   3
  -7  13  -2 1219.13 543.548  31
  -7 -13  -3 74.5620 181.723  26
   8   0 -19-117.399 409.654  13
   8   0 -18 7891.74 1868.57  14
   8   0 -18 8715.15 2647.32  13
   8   0 -17-477.089 443.749  16
   8   0 -17 561.036 741.080  14
   8   0 -17 646.839 790.970  31
   8   0 -17-727.497 880.071  13
   8   0 -16 11871.6 2716.42  13
   8   0 -16 12497.9 2344.12  14
   8   0 -16 8129.76 3401.67  31
   8   0 -16 12004.2 2160.88  16
   8   0 -15-328.025 678.155  13
   8   0 -15-501.551 748.113  31
   8   0 -15-217.290 541.236  16
   8   0 -15-282.480 566.763  14
   8   0 -14 43457.7 4002.67  16
   8   0 -14 41081.8 3939.36  14
   8   0 -14 34240.8 6071.27  31
   8   0 -14 42607.0 4770.17  13
   8   0 -13 65.9221 323.376  13
   8   0 -13 591.275 584.047  16
   8   0 -13-438.992 660.097  32
   8   0 -13-128.620 469.247  14
   8   0 -13 798.906 652.529  31
   8   0 -12 822.025 847.760  40
   8   0 -12 1849.08 832.116  13
   8   0 -12 1048.89 1250.49  38
   8   0 -12 2512.78 1657.38  31
   8   0 -11 299.698 570.044  40
   8   0 -11-568.211 818.889  38
   8   0 -10 2460.86 1567.56  38
   8   0 -10 4628.13 1515.37  40
   8   0  -9 19.3597 220.761  40
   8   0  -9-397.354 748.912  38
   8   0  -9-844.622 942.590  33
   8   0  -8 266182. 9979.25  40
   8   0  -8 291593. 13663.2  37
   8   0  -8 267859. 13082.6  33
   8   0  -7-467.486 477.250  38
   8   0  -7 145.995 218.654  37
   8   0  -7-565.361 596.747  33
   8   0  -7-58.9281 286.774  40
  -8   0   6 449706. 15276.4  29
  -8   0   6 350654. 8855.49  41
   8   0  -6 402084. 10631.4  40
   8   0  -6 424691. 13306.8  37
   8   0  -6 369608. 12447.5  33
  -8   0   5-166.172 257.021  29
   8   0  -5 62.4742 378.507  40
   8   0  -5-7.74122 168.367  38
   8   0  -5 19.5035 198.679  37
  -8   0   5 52.0784 149.282  41
   8   0  -5 273.719 452.591  33
  -8   0   4 5565.14 1225.09  41
   8   0  -4 7628.41 1397.37  37
   8   0  -4 7172.47 1344.14  38
  -8   0   4 10285.2 1784.13  29
   8   0  -4 10801.2 1647.92  33
  -8   0   3-125.563 200.109  29
  -8   0   3-92.7865 198.484  41
   8   0  -3 4.64194 238.377  38
   8   0  -3 19.3624 93.0171  37
   8   0  -3 28.8667 98.7612  33
  -8   0   2 634178. 9078.94  29
   8   0  -2 612652. 3631.95  35
   8   0  -2 604913. 8193.25  37
   8   0  -2 570235. 8558.90  38
   8   0  -2 575892. 7572.05  33
  -8   0   1-25.2221 87.7898  30
   8   0  -1-16.5029 100.566  38
  -8   0   1 65.3447 118.051  36
  -8   0   0 333406. 7166.40  36
   8   0   1-15.8691 64.0118  30
  -8   0  -1 48.5687 94.5974  41
  -8   0  -1 38.3576 226.769  36
  -8   0  -2 176286. 6594.05  36
  -8   0  -2 141147. 5199.75  41
   8   0   3 109.527 136.690  29
  -8   0  -3-8.45839 105.778  41
  -8   0  -3-17.2924 164.930  36
   8   0   4 172612. 6896.18  29
  -8   0  -4 159887. 5103.52  41
   8   0   5-68.5614 351.738  29
  -8   0  -5-44.9059 410.190  36
   8   0   5-26.8081 229.445   1
   8   0   6 38.4716 177.047   1
  -8   0  -6-225.594 530.250  36
   8   0   7 144.604 202.589   1
  -8   0  -7-103.332 457.211  36
   8   0   8 1706.38 1144.37   1
  -8   0  -8 5944.28 2028.84  36
   8   0   9 281.177 643.017   1
  -8   0  -9-286.082 420.523  36
   8   0  10 11764.1 2614.95   1
  -8   0 -10 41540.5 6298.31  36
  -8   0 -11 908.542 872.286  19
  -8   0 -12 9405.83 1797.17  16
  -8   0 -12 7045.79 1822.88  19
  -8   0 -13 11.8978 496.586  13
  -8   0 -13-343.119 610.585  16
  -8   0 -13 777.650 576.419  19
  -8   0 -14 16215.1 2297.63  16
  -8   0 -14 12074.2 2326.40  19
  -8   0 -15-445.794 404.102  16
  -8   0 -16 30850.9 2847.00  16
  -8   0 -16 25937.5 3237.71  14
  -8   0 -17 9.82771 146.255  14
  -8   0 -17-113.935 229.415  16
   8   2 -19-810.503 804.888  13
   8   2 -18 169.117 452.127  13
   8  -2 -18 968.435 508.548  16
   8   2 -18 796.234 670.210  15
   8  -2 -18 758.180 596.614  14
   8   2 -18-417.246 560.697  31
   8   2 -17-379.482 816.361  13
   8  -2 -17-60.7633 181.405  14
   8  -2 -17-764.697 666.254  13
   8   2 -17-168.056 596.967  14
   8  -2 -17-190.090 466.965  16
   8   2 -17 296.297 1154.53  31
   8  -2 -16 12129.6 3034.81  13
   8   2 -16 7228.22 2727.32  31
   8   2 -16 11522.7 2442.08  14
   8   2 -16 10652.0 2488.10  13
   8  -2 -16 9306.65 1851.00  14
   8  -2 -16 9714.02 1846.52  16
   8   2 -15 2.18724 203.758  13
   8   2 -15 971.601 1302.52  31
   8  -2 -15 283.993 307.398  16
   8   2 -15 174.688 288.535  16
   8  -2 -15 575.300 506.318  13
   8  -2 -15 167.448 307.025  14
   8   2 -15 459.143 497.123  14
   8   2 -14 9683.95 1823.16  16
   8   2 -14 10055.5 2210.38  13
   8   2 -14 10146.3 2079.24  14
   8  -2 -14 10203.1 1879.39  16
   8  -2 -14 10293.1 1836.41  14
   8  -2 -14 7136.93 2841.13  31
   8   2 -14 9282.00 3153.17  31
   8  -2 -14 11116.4 2547.72  13
   8  -2 -13 919.981 611.954  13
   8  -2 -13 1200.46 573.524  10
   8   2 -13 1155.32 684.734  32
   8   2 -13 870.136 474.471  16
   8   2 -13 544.614 572.190  13
   8   2 -13 496.103 317.492  14
   8  -2 -13 775.479 712.913  31
   8   2 -13 657.238 303.368  31
   8   2 -12 5708.94 1464.28  13
   8  -2 -12 4102.61 1021.85  27
   8   2 -12 3011.04 1440.35  40
   8  -2 -12 5730.90 1569.24  13
   8  -2 -12 4898.22 1150.36  10
   8   2 -12 6008.28 1449.87  14
   8   2 -12 5826.07 1316.78  16
   8   2 -12 4662.34 1528.90  32
   8   2 -12 3930.61 1752.87  31
   8  -2 -12 4371.69 2084.93  31
   8   2 -11 20554.2 5089.73  37
   8   2 -11 16556.3 2993.54  40
   8  -2 -11 18606.0 3443.48  40
   8   2 -11 13897.7 3961.19  38
   8  -2 -11 13767.9 4341.63  33
   8  -2 -10 7163.49 2835.31  33
   8   2 -10 5574.83 1700.09  40
   8   2 -10 6778.62 2721.79  37
   8  -2 -10 5802.53 1788.48  40
   8   2 -10 3030.25 1556.08  38
   8   2  -9 2560.43 986.965  40
   8  -2  -9 2234.84 1011.88  40
   8   2  -9 1378.96 1019.92  38
   8   2  -9 3017.44 1547.47  37
   8  -2  -9 779.620 687.356  33
   8   2  -8 159486. 12230.3  28
   8   2  -8 111183. 6428.79  40
   8   2  -8 146173. 10504.6  37
   8  -2  -8 133533. 10804.4  33
   8  -2  -8 116028. 6922.06  40
   8   2  -7 878.534 698.029  28
   8   2  -7 633.594 523.964  38
   8   2  -7 454.318 355.822  40
   8  -2  -7 1054.26 836.899  33
   8  -2  -7 702.199 498.575  40
   8   2  -7 369.858 471.187  37
   8   2  -6 456958. 17058.8  28
   8  -2  -6 331955. 9950.84  40
   8   2  -6 333920. 9808.81  40
   8   2  -6 303454. 12412.3  38
   8  -2  -6 432984. 16770.4  33
  -8  -2   6 389539. 7252.74  41
  -8   2   6 392726. 11261.2  41
  -8   2   5 20655.2 4027.81  30
   8   2  -5 23848.1 3572.21  28
   8   2  -5 15616.0 1771.69  36
   8   2  -5 18215.6 2860.54  38
  -8   2   5 20144.8 2293.97  41
   8   2  -5 20695.3 2393.84  40
  -8  -2   5 26151.0 1954.98  41
   8  -2  -5 24371.7 3642.37  33
  -8   2   5 21722.5 1866.94   2
   8   2  -5 18608.5 1847.85   2
   8  -2  -5 16821.2 2061.02  40
   8  -2  -4 295387. 11866.6  33
  -8   2   4 234588. 13274.2  30
   8   2  -4 328399. 12286.5  29
  -8  -2   4 262375. 6436.22  41
   8  -2  -4 220325. 6878.70  40
   8   2  -4 235342. 6086.00   2
   8  -2  -4 298105. 12319.3  39
   8   2  -3 17863.8 2669.01  29
   8  -2  -3 12426.5 1501.12  40
   8  -2  -3 16084.9 2776.77  39
   8   2  -3 17202.0 1628.12   2
   8  -2  -3 17610.8 2727.98  33
  -8  -2   3 21701.7 1899.24  41
  -8  -2   2 47795.1 2847.15  41
   8   2  -2 40214.3 2394.02   2
   8   2  -2 43352.2 2126.95  35
   8  -2  -1 47258.6 5241.50  30
   8  -2  -1 40020.6 1910.25   1
   8   2  -1 48041.0 2634.90   2
   8   2  -1 48450.3 2441.91  35
   8  -2  -1 47435.7 5021.32  34
   8  -2   0 10672.9 1115.59   1
   8   2   0 10046.1 1217.08   2
  -8  -2   0 10728.0 1347.04  41
   8   2   0 9524.44 1162.23  35
  -8  -2  -1 52267.9 4410.22  30
   8   2   1 54367.0 2861.03   2
  -8  -2  -1 60807.3 3111.42  41
  -8   2  -1 64840.6 3354.51  36
   8   2   1 47778.9 2913.90  35
   8  -2   1 60296.5 2951.50   1
  -8  -2  -1 50711.4 4196.08  34
  -8   2  -2 473102. 10889.5  29
  -8  -2  -2 510494. 8889.91  41
   8  -2   2 509341. 9509.70   1
  -8  -2  -2 440960. 10680.4  39
  -8   2  -2 420250. 5751.53  38
  -8   2  -2 491792. 10593.6  36
  -8  -2  -2 469902. 11571.3  36
  -8  -2  -2 443626. 11090.2  33
   8   2   2 485085. 8922.50   2
   8  -2   3 81022.7 4121.00   1
  -8  -2  -3 75459.5 3357.04  41
  -8   2  -3 71840.9 2702.14  38
  -8   2  -3 70793.6 4416.11  29
  -8   2  -3 78403.9 4741.23  36
  -8  -2  -3 66844.2 4826.07  36
  -8   2  -3 72572.4 3381.58  41
  -8  -2  -3 74663.9 4622.30  33
  -8  -2  -3 65672.8 4295.79  39
  -8   2  -4 72652.0 4787.32  28
  -8  -2  -4 59477.3 5102.48  36
  -8   2  -4 59792.0 3226.49  41
  -8   2  -4 67143.3 4835.30  36
  -8  -2  -4 78221.3 3495.58  41
  -8  -2  -4 73270.1 4889.10  33
   8  -2   4 73554.6 4268.22   1
   8   2   5 13451.9 3202.53  30
  -8   2  -5 25103.7 3022.27  28
  -8   2  -5 25154.8 3233.86  36
  -8  -2  -5 17286.3 2957.82  36
   8  -2   5 25339.7 2705.26   1
  -8  -2  -5 23087.3 2897.12  33
  -8   2  -6 836.455 615.731  28
   8  -2   6 12.9784 238.362   1
  -8  -2  -6 675.303 114.602  33
  -8   2  -6-152.261 386.071   2
  -8  -2  -6 204.670 481.057  36
  -8   2  -6 400.628 482.533  37
  -8   2  -6-163.154 361.952  36
   8  -2   7 5039.00 1408.70   1
  -8   2  -7 5145.70 1434.76  37
  -8   2  -7 7131.57 1927.16  36
  -8  -2  -7 3420.62 1530.86  36
  -8  -2  -7 5964.54 1639.09  33
   8  -2   8 16004.2 2671.23   1
  -8  -2  -8 9818.04 2839.08  36
  -8  -2  -9 394.222 337.289  36
   8   2   9-401.378 587.412   1
  -8   2  -9 24.1580 358.344  36
   8  -2   9 247.431 125.374   1
   8  -2  10 29731.9 3980.47   1
  -8  -2 -10 26240.7 4860.59  36
  -8  -2 -11 24497.5 2607.95  27
  -8   2 -11 24815.1 2848.86  16
  -8   2 -11 18205.9 2855.95  19
  -8   2 -12 29778.3 3961.87  19
  -8  -2 -12 30247.9 3038.35  27
  -8   2 -12 35127.5 3516.28  16
  -8   2 -13 2307.30 1034.52  19
  -8  -2 -13 2713.19 964.890  27
  -8   2 -13 2347.49 914.581  16
  -8   2 -14 3786.57 1378.71  13
  -8   2 -14 2891.09 1095.39  19
  -8   2 -14 3556.34 1208.06  14
  -8  -2 -14 4665.82 1328.49  16
  -8  -2 -14 2452.18 921.384  27
  -8   2 -14 3621.75 1034.20  16
  -8  -2 -15 4100.96 1115.25  27
  -8   2 -15 4687.23 1656.98  13
  -8  -2 -15 11503.2 1873.49  16
  -8   2 -15 10027.3 1591.79  16
  -8   2 -15 10839.6 2106.05  14
  -8   2 -16 8659.52 1960.86  13
  -8  -2 -16 15643.7 2047.01  16
  -8   2 -16 14791.5 2251.91  14
  -8   2 -17 1030.82 427.493  13
  -8  -2 -17 2092.12 589.697  16
  -8  -2 -17 1890.36 754.328  14
  -8   2 -17 1377.22 532.160  15
  -8   2 -17 2268.23 752.564  14
   8   4 -18 6778.72 1847.86  13
   8   4 -18 7334.90 1806.33  15
   8   4 -18 6264.70 2406.37  31
   8  -4 -17 767.072 360.915  27
   8   4 -17 1411.14 942.573  13
   8   4 -17 543.606 658.636  31
   8   4 -17 736.143 140.403  15
   8  -4 -16 20155.5 2776.74  27
   8  -4 -16 19250.3 2399.48  16
   8   4 -16 22168.9 3313.09  15
   8   4 -16 18755.6 3146.18  13
   8   4 -16 19315.0 4557.83  31
   8  -4 -15 2960.98 997.316  16
   8  -4 -15 2904.88 969.022  27
   8   4 -15 3617.04 1253.96  13
   8   4 -15 3691.45 1488.14  15
   8   4 -15 3033.49 1935.10  31
   8   4 -14 22470.6 3305.76  15
   8  -4 -14 20291.9 2678.57  27
   8   4 -14 22129.8 4859.24  31
   8   4 -14 19254.3 3023.29  13
   8  -4 -13 15986.5 2326.30  27
   8   4 -13 17928.4 4264.17  31
   8   4 -13 19780.4 2993.37  15
   8   4 -13 22025.4 3365.81  14
   8   4 -13 14962.8 2865.00  32
   8   4 -13 17215.7 2671.78  13
   8   4 -12 822.240 510.275  13
   8  -4 -12 467.951 662.619  12
   8  -4 -12 22.2738 264.748  27
   8  -4 -12 173.375 1340.91  17
   8   4 -12 492.071 362.105  31
   8   4 -12 553.894 359.808  14
   8  -4 -11 49516.1 4878.31  12
   8   4 -11 43357.6 4205.59  14
   8  -4 -11 47105.5 3647.82  27
   8  -4 -11 61996.2 4393.41  10
   8  -4 -11 61272.9 7905.21  17
   8   4 -11 36372.8 5554.23  31
   8   4 -11 45248.4 3858.71  13
   8   4 -10 19461.2 5780.25  28
   8   4 -10 16636.7 4849.22  37
   8  -4 -10 15273.0 5058.39  33
   8   4 -10 10380.6 3389.42  38
   8   4  -9 3665.95 2460.72  28
   8  -4  -9 2435.64 1112.51  40
   8   4  -9 2202.49 1677.41  38
   8  -4  -9 2302.01 1554.73  33
   8   4  -8 80507.2 10252.4  28
   8  -4  -8 56014.8 5281.94  40
   8  -4  -8 63613.6 9296.74  33
   8  -4  -7 63480.6 9064.39  39
   8   4  -7 50151.5 6603.52  38
   8  -4  -7 50730.0 4620.96  40
   8  -4  -7 59001.6 8616.22  33
   8   4  -6 82637.4 4448.06   2
   8  -4  -6 114256. 11453.9  33
   8  -4  -6 123144. 12245.2  39
   8  -4  -6 93622.3 5719.47  40
   8  -4  -5 1605.54 1086.74  39
   8  -4  -5 1922.78 725.676  40
  -8   4   5 1639.44 674.311   2
   8   4  -5 1739.89 604.718   2
   8   4  -5 1367.68 553.447  40
   8  -4  -5 2437.16 1556.87  33
  -8   4   4 523.642 302.532   2
   8  -4  -4 447.593 316.029  40
   8   4  -4 429.932 265.032   2
   8  -4  -4-47.4618 943.508  33
  -8   4   3 1300.90 564.234   2
   8   4  -3 1609.99 581.720   2
   8  -4  -3 974.500 438.306  40
  -8   4   2 5871.38 1236.36   2
  -8  -4   2 5646.87 1110.89  41
   8   4  -2 4296.72 877.540   2
   8  -4  -2 8182.88 2971.72  34
   8   4  -1 2183.40 647.908  35
   8  -4  -1 2489.94 1819.39  30
  -8   4   1 1824.25 635.392   2
   8  -4  -1 1595.42 945.839  34
  -8  -4   1 2208.37 767.498  41
   8   4  -1 1628.38 560.601   2
  -8   4   0 222783. 8115.17   2
   8   4   0 238046. 7038.98  35
  -8   4  -1 33951.7 3238.76   2
   8   4   1 29950.7 2342.41   2
   8   4   1 36333.5 2932.68  35
  -8  -4  -1 27997.7 4708.57  34
   8   4   2 343758. 9428.53  35
  -8   4  -2 323273. 10316.7   2
  -8  -4  -2 345884. 15838.1  34
  -8   4  -3 5564.84 1352.45   2
   8   4   3 5161.00 1034.48   2
   8   4   3 5917.92 1276.85  35
  -8   4  -3 6209.77 1328.30  36
  -8   4  -4 69888.6 5071.57   2
  -8  -4  -4 67203.6 6221.95  39
  -8   4  -4 76887.9 5353.14  36
   8   4   4 69876.3 3893.58   2
   8   4   4 62464.7 4401.15  35
  -8  -4  -4 72983.8 6593.79  33
   8   4   5 334.839 315.990   2
  -8  -4  -5 35.2822 129.459  39
  -8   4  -5 136.412 157.154  36
   8   4   5 469.331 491.112  35
  -8  -4  -5 672.527 652.868  33
  -8   4  -6 7757.65 2113.87  28
  -8   4  -6 8214.95 1814.20   2
  -8   4  -6 9174.78 2232.58  36
   8   4   6 5458.56 1410.44  35
  -8  -4  -6 7817.10 2223.81  33
  -8   4  -7 4112.05 1588.82  28
  -8   4  -7 3688.79 1542.27  36
  -8  -4  -7 3601.09 1433.67  33
   8   4   7 2512.39 986.406  35
  -8   4  -8 17014.6 3469.08  28
  -8   4  -8 19352.6 3791.07  36
   8   4   8 13237.8 2401.02  35
  -8  -4  -9 16066.0 1939.66  27
  -8   4  -9 16025.3 2623.67  19
  -8  -4  -9 18876.6 2246.14  18
  -8   4  -9 15905.8 3538.83  36
   8   4   9 8762.94 2095.84  35
  -8  -4 -10 7847.50 1419.34  27
  -8   4 -10 7010.89 1816.17  19
  -8   4 -10 9574.52 1783.96  16
  -8  -4 -10 11576.4 1819.70  18
  -8   4 -11 28995.0 3838.81  19
  -8  -4 -11 34715.8 3090.93  27
  -8  -4 -11 38937.5 3387.03  18
  -8  -4 -12 699.464 472.404  27
  -8   4 -12 813.423 557.045  19
  -8   4 -12 426.866 46.1508  21
  -8  -4 -13 5567.96 1292.79  27
  -8   4 -13 4603.93 1560.17  21
  -8   4 -14 117.913 431.146  13
  -8  -4 -14 241.842 273.549  27
  -8   4 -14 600.796 638.998  21
  -8   4 -14 942.085 578.541  15
  -8   4 -15-180.518 559.464  13
  -8   4 -15 80.6646 52.2611  15
  -8  -4 -15 823.311 480.755  27
  -8   4 -16 2949.07 1132.03  13
  -8  -4 -16 5469.36 1165.32  16
  -8  -4 -16 3566.10 985.239  27
  -8   4 -16 5311.63 1152.88  15
   8  -6 -17 4604.82 1135.42  27
   8   6 -17 4965.08 1363.96  15
   8   6 -17 5595.43 2014.09  31
   8  -6 -16 16468.3 2385.57  27
   8   6 -16 13873.5 2464.70  15
   8   6 -16 16371.1 2661.28  13
   8   6 -16 14048.2 3610.09  31
   8   6 -15 4578.35 1402.28  13
   8  -6 -15 4853.59 1291.38  27
   8   6 -15 4696.43 1406.40  15
   8   6 -15 6603.72 2563.42  31
   8  -6 -14 28833.6 3197.79  27
   8  -6 -14 27084.1 2756.87  11
   8   6 -14 29322.4 3877.63  15
   8   6 -14 26863.4 3403.67  13
   8   6 -14 29136.7 5755.36  31
   8   6 -13 2953.77 1093.84  13
   8  -6 -13 3284.73 1062.52  27
   8  -6 -13 4659.26 1210.64  11
   8  -6 -13 2879.30 1899.07  17
   8   6 -13 3596.27 1276.81  15
   8   6 -13 3163.80 1591.73  31
   8   6 -12 5701.43 1620.04  15
   8  -6 -12 6299.40 1511.37  11
   8  -6 -12 4545.22 2208.69  17
   8   6 -12 5289.68 2092.14  31
   8  -6 -12 5107.37 1294.94  27
   8  -6 -11 527.171 445.942  27
   8  -6 -11 101.478 1207.09  17
   8  -6 -11 843.049 718.121  11
   8   6 -11 843.317 661.051  31
   8   6 -11 968.170 655.974  15
   8  -6 -10 6441.21 1380.68  27
   8  -6 -10 11121.1 2086.98  11
   8  -6 -10 7979.09 3195.70  17
   8   6 -10 8182.46 1820.25  15
   8   6 -10 10119.1 3086.55  31
   8  -6  -9 803.930 512.659  27
   8  -6  -9 430.790 533.365  11
   8   6  -9 724.990 502.572  15
   8   6  -9 739.035 708.342  31
   8   6  -8 27716.8 7206.54  28
   8  -6  -8 19890.8 6428.80  39
   8   6  -8 14763.4 4308.70  38
   8  -6  -8 23065.5 6599.72  33
   8  -6  -7-3778.07 2709.16  39
   8  -6  -7 1135.30 1680.29  33
   8  -6  -6 55971.3 10389.1  39
   8   6  -6 40871.4 3855.90   2
   8  -6  -6 48248.4 9365.55  33
   8   6  -5 815.113 575.367   2
   8  -6  -5 1197.74 1607.04  39
   8  -6  -5 2152.36 1979.88  33
  -8   6   5 484.382 357.167   2
  -8   6   4 30497.6 3469.68   2
   8   6  -4 27781.9 2969.36   2
  -8   6   3 1673.80 858.509   2
   8   6  -3 1324.76 652.038   2
   8  -6  -3 2225.63 666.261  34
  -8   6   2 6646.68 1639.97   2
   8   6  -2 5880.70 1259.00   2
   8  -6  -2 10490.5 4628.56  34
  -8   6   1 7444.23 1734.07   2
   8   6  -1 5865.60 1239.35   2
   8  -6  -1 5264.24 2483.24  34
  -8   6   0 35237.3 3932.80   2
   8   6   0 26899.5 2704.88   2
   8   6   0 39586.5 3544.23  35
  -8  -6   0 24793.9 5710.49  34
   8  -6   0 26106.5 6604.94  34
  -8  -6  -1 36331.5 6655.95  34
  -8   6  -1 47472.4 4635.02   2
   8   6   1 34007.9 3037.04   2
   8   6   1 47928.0 3946.15  35
   8   6   2 61578.4 4124.24   2
  -8   6  -2 80679.6 6305.38   2
   8   6   2 87233.5 5444.27  35
  -8  -6  -2 88293.4 10134.6  34
  -8   6  -3 6151.18 1755.10   2
   8   6   3 4180.38 1084.46   2
   8   6   3 6293.25 1460.15  35
  -8   6  -4 15614.7 2847.32   2
  -8  -6  -4 15756.5 3767.00  33
  -8  -6  -4 9600.01 2955.30  39
   8   6   4 11873.7 1855.80   2
  -8   6  -4 14907.7 2698.67  36
   8   6   4 16792.1 2551.11  35
  -8   6  -5 22443.1 3548.98   2
   8   6   5 22959.6 3113.07  35
  -8  -6  -5 22920.1 4558.23  33
  -8  -6  -5 16738.5 3809.70  39
  -8   6  -5 24846.4 3765.11  36
  -8  -6  -6 207.358 580.967  39
   8   6   6 102.001 398.948  35
  -8  -6  -6-273.828 641.435  33
  -8   6  -6 542.433 561.840  36
  -8  -6  -7 24377.7 2342.87  27
  -8  -6  -7 18257.0 2537.36  26
   8  -6   7 14751.1 2408.12   9
   8   6   7 16187.4 2793.41  35
  -8  -6  -8 31847.1 2836.23  27
  -8   6  -8 25549.6 3535.50  21
   8  -6   8 27441.8 3457.74   9
  -8  -6  -8 33648.8 3275.72  18
  -8  -6  -9 5460.49 1178.92  27
   8  -6   9 4830.14 1501.75   9
  -8   6  -9 4820.97 1556.00  21
  -8  -6  -9 6638.51 1392.20  18
  -8  -6 -10 35488.0 3191.28  27
  -8   6 -10 30399.0 4100.00  21
   8  -6  10 24122.6 3335.96   9
  -8   6 -10 40114.2 4236.91  15
  -8  -6 -10 44457.7 3673.04  18
  -8  -6 -11 4355.67 1127.90  27
   8  -6  11 1902.48 834.725   9
  -8  -6 -11 5105.96 1178.68  18
  -8   6 -11 2960.04 1204.41  21
  -8   6 -11 4482.11 1244.21  15
  -8  -6 -12 5158.71 1284.09  27
  -8   6 -12 3908.52 1428.22  21
  -8   6 -12 6394.45 1545.58  15
  -8  -6 -13 2091.19 779.916  27
  -8   6 -13 2215.15 843.333  15
  -8   6 -13 1469.51 702.431  21
  -8   6 -14-125.259 594.285  13
  -8   6 -14 628.923 466.533  15
  -8  -6 -14 34.1593 248.359  27
  -8  -6 -15 395.021 360.192  27
  -8   6 -15 125.084 143.438  13
   8  -8 -15 7560.45 1456.43  27
   8   8 -15 9845.89 2579.17  31
   8  -8 -14 13573.6 2074.98  27
   8   8 -14 15751.7 2704.10  22
   8   8 -14 14492.0 3449.33  31
   8  -8 -13 16926.5 2381.90  27
   8  -8 -13 17885.2 2100.33  11
   8   8 -13 18199.3 4059.29  31
   8   8 -13 18500.4 2922.82  22
   8  -8 -13 8932.47 2736.73  17
   8  -8 -12 10066.9 1848.53  27
   8  -8 -12 10625.6 1765.52  11
   8  -8 -12 6260.51 2179.81  17
   8   8 -12 12965.7 3584.53  31
   8  -8 -11 3026.35 966.488  27
   8  -8 -11 4582.67 1223.49  11
   8  -8 -11 2365.49 2004.75  17
   8   8 -11 3707.09 1930.36  31
   8  -8 -10 615.933 399.264  27
   8  -8 -10 1438.52 787.723  11
   8  -8 -10 908.852 606.878  17
   8   8 -10 640.494 791.718  31
   8   8  -9-174.755 757.788  31
   8  -8  -9 287.084 293.693  27
   8  -8  -9 559.502 452.186  11
  -8  -8   9-123.298 461.499   9
   8  -8  -8 612.654 359.867  27
   8  -8  -8 929.952 628.818  11
   8   8  -8 535.238 447.290  31
  -8  -8   8 934.078 659.855   9
   8   8  -7 1309.22 1428.24  31
   8  -8  -7 679.813 658.807  11
   8  -8  -7 298.765 227.898  27
  -8  -8   7 616.979 421.554   9
   8   8  -6 7213.22 2609.90  31
   8  -8  -6 2465.48 783.066  27
   8  -8  -6 4343.00 1486.43  11
   8  -8  -6 3327.97 1020.06  24
  -8  -8   6 4353.53 1264.15   9
   8  -8  -5 15340.2 2657.71  11
   8  -8  -5 10838.9 1808.67  24
   8  -8  -5 14204.2 4080.69   3
  -8  -8   5 13401.1 2211.36   9
   8   8  -5 19548.6 4030.14  31
   8  -8  -4 651.482 458.060  24
   8  -8  -4 101.892 1332.67   3
  -8  -8   4 718.697 533.749   9
   8  -8  -4-18.2498 241.296  11
   8   8  -4 2432.25 1557.75  31
   8  -8  -3 11321.1 2331.67  11
   8  -8  -3 16579.6 2206.90  24
  -8  -8   3 19266.6 2579.65   9
   8  -8  -3 16361.8 4571.71   3
   8  -8  -2 2054.19 750.400  24
   8  -8  -2 1785.52 932.910  11
   8  -8  -2 1034.83 1586.50  34
  -8  -8   2 2430.09 1882.37  34
   8  -8  -1 177.005 315.945  24
  -8  -8   1-1047.36 1279.91  34
   8  -8  -1-2933.22 3644.53  34
   8  -8   0 13762.6 2021.06  24
  -8  -8   0 12225.4 1855.55  25
  -8  -8   0 8965.22 4074.26  34
   8  -8   0 11271.0 5149.56  34
   8  -8   1 17003.4 2261.20  24
  -8  -8  -1 23000.6 2566.03  25
  -8  -8  -1 12446.7 4258.87  34
   8  -8   1 9703.31 4140.52  34
  -8  -8  -2 10034.1 1793.84   6
  -8  -8  -2 11133.2 1834.47  25
   8  -8   2 11322.7 2041.59   9
  -8  -8  -2 8368.85 2183.25   3
   8  -8   2 9059.03 1679.70  24
  -8  -8  -3 29502.8 3294.97   6
  -8  -8  -3 29968.8 3096.34  25
   8  -8   3 27409.1 2956.06  24
  -8  -8  -3 24949.1 4576.92   3
   8  -8   3 30668.8 3477.39   9
  -8   8  -3 28068.6 3810.05  31
  -8  -8  -4 478.915 351.623  25
  -8  -8  -4-395.648 1289.59   3
   8  -8   4 953.584 630.473   9
  -8   8  -4 830.064 651.813  21
  -8   8  -4 1012.11 692.929  31
  -8   8  -5 320.473 299.425  31
  -8  -8  -5 36.3045 40.8413  26
   8  -8   5-94.0890 220.790   9
  -8   8  -5-130.703 147.149  21
  -8  -8  -6 383.989 414.015  26
   8  -8   6 295.463 307.811   9
  -8   8  -6 497.596 432.333  21
  -8   8  -6-68.6180 174.451  31
  -8   8  -7 929.338 585.951  31
  -8   8  -7 1084.28 741.161  21
   8  -8   7 1009.99 602.997   9
  -8  -8  -7 1849.29 913.057  26
  -8  -8  -8 23316.6 2618.28  27
  -8  -8  -8 10598.9 2123.53  26
  -8   8  -8 19492.3 3278.16  21
   8  -8   8 17585.9 2970.38   9
  -8   8  -8 16601.9 2623.80  31
  -8  -8  -8 23388.4 2783.18  18
  -8  -8  -8 15785.8 2787.81  17
  -8  -8  -9 20485.8 2426.74  27
  -8   8  -9 17704.3 3150.23  21
  -8  -8  -9 20549.8 2436.28  18
   8  -8   9 15058.1 2722.84   9
  -8   8  -9 14598.3 2361.10  31
  -8  -8 -10 15485.9 2096.30  27
  -8   8 -10 13916.1 2757.89  21
   8  -8  10 11938.0 2347.39   9
  -8  -8 -10 17724.5 2189.46  18
  -8   8 -10 11984.9 2052.26  31
  -8  -8 -11 9790.10 1619.17  27
  -8   8 -11 8651.44 2161.27  21
   8  -8  11 4812.03 1400.08   9
  -8  -8 -11 9366.83 1497.08  18
  -8   8 -12 2368.00 935.341  13
  -8  -8 -12 2968.32 857.842  27
   8  -8  12 1313.79 502.132   9
  -8  -8 -13 1401.43 569.385  27
  -8   8 -13 1509.06 695.890  13
  -8  -8 -14 6.18744 76.6001  27
   8  10 -13 1985.56 979.754  31
   8 -10 -12 5378.81 1143.81  27
   8 -10 -12 5863.19 1053.72  11
   8 -10 -12 1106.60 440.918  17
   8  10 -12 6473.17 1572.72  22
   8  10 -12 7272.15 2080.69  31
   8 -10 -11 781.928 417.038  27
   8 -10 -11 430.245 339.224  11
   8  10 -11 471.132 393.838  22
   8 -10 -11-231.539 1132.62  17
   8  10 -11 474.705 688.062  31
   8 -10 -10 444.981 312.526  27
   8 -10 -10-547.012 1264.69  17
  -8 -10  10 471.775 368.170   6
   8 -10 -10 117.280 193.436  11
   8  10 -10 448.748 407.281  31
  -8 -10   9 6669.61 1526.07   6
   8 -10  -9 6114.42 1322.67  27
   8  10  -9 7154.62 2398.70  31
   8 -10  -9 6055.27 1381.85  11
   8 -10  -9 3052.41 1539.68  17
   8 -10  -8 981.648 569.788  11
  -8 -10   8 988.548 569.234   6
   8  10  -8 970.580 661.240  31
  -8 -10   7 6831.84 1500.95   6
   8  10  -7 10047.9 2915.67  31
   8 -10  -7 7190.50 1720.95  25
   8 -10  -7 7796.21 1770.74  11
   8 -10  -6 1538.72 613.651  25
   8  10  -6 2750.10 1418.24  31
   8 -10  -6 1375.11 587.454  11
   8 -10  -5 2318.72 958.664  11
   8 -10  -5 2704.84 1087.83  25
   8  10  -5 3224.22 1435.38  31
  -8 -10   5 2450.81 891.127   6
   8 -10  -4 128.107 365.187  11
  -8 -10   4 485.406 395.709   6
   8 -10  -4-1554.31 2123.46   3
   8 -10  -4-278.586 331.937  24
   8  10  -4 204.198 698.302  31
   8 -10  -3 369.370 422.181  11
  -8 -10   3 1879.65 845.116  25
  -8 -10   3 1585.12 735.144   6
   8 -10  -3 2047.13 939.571  24
   8 -10  -3 1257.43 1351.59   3
   8  10  -3 2157.26 1333.41  31
   8  10  -2 6849.47 2187.43  31
  -8 -10   2 7410.75 1569.26   6
   8 -10  -2 2545.90 1273.40  11
   8 -10  -2 8704.27 1846.20  24
   8 -10  -2 2728.77 1611.41   3
  -8 -10   2 8282.32 1701.71  25
  -8 -10   1 7295.66 1586.61   6
  -8 -10   1 7512.02 1636.88  25
   8 -10  -1 7037.36 1657.84  24
   8 -10  -1 2223.81 1888.67   3
  -8 -10   0 3587.11 1139.51  25
  -8 -10   0 3861.97 1146.19   6
   8 -10   0 471.454 929.802   3
  -8 -10   0 1938.04 231.606   3
   8 -10   0 4057.07 1273.85  24
   8 -10   1 5020.71 1470.31   9
  -8 -10  -1 3930.32 1220.01   6
  -8 -10  -1 3144.83 1074.81  25
   8 -10   1 3979.16 1231.04  24
  -8 -10  -1 2075.75 1344.67   3
  -8  10  -2 1532.60 919.742  31
  -8 -10  -2 1628.71 780.545  25
   8 -10   2 1862.88 808.703  24
   8 -10   2 1096.07 649.437   9
  -8 -10  -2 1285.68 1433.13   3
  -8 -10  -2 830.755 543.869   6
   8 -10   3 1261.87 707.406  24
  -8 -10  -3 1201.84 652.677  26
  -8 -10  -3 27.5555 1284.55   3
   8 -10   3 1180.71 781.025   9
  -8  10  -3 1078.01 777.607  31
   8 -10   4 165.375 368.278   9
  -8 -10  -4 0.43723 279.101  26
  -8  10  -4-129.978 271.348  31
   8 -10   5 71.0571 301.749   9
  -8 -10  -5 382.894 374.537  26
  -8  10  -5-43.7614 341.542  31
  -8 -10  -6 1669.13 759.465  26
   8 -10   6 2108.23 1004.68   9
  -8  10  -6 1712.95 870.591  31
  -8 -10  -7 3798.12 1181.21  26
  -8 -10  -7 5865.95 1280.64  18
   8 -10   7 6885.46 1840.45   9
  -8  10  -7 5184.28 1390.45  31
   8 -10   8 8737.58 1974.64   9
  -8 -10  -8 5924.78 1556.84  17
  -8  10  -8 7366.05 1549.57  31
  -8 -10  -8 10656.1 1569.97  18
   8 -10   9 4555.02 1403.18   9
  -8 -10  -9 5042.45 1003.70  18
   8 -10  10 7925.74 1763.20   9
  -8 -10 -10 14040.4 1506.70  18
   8 -10  11 232.470 297.106   9
  -8 -12   8 319.090 272.789   6
   8  12  -8 516.852 583.421  31
   8  12  -8 594.110 513.049  22
   8 -12  -8 629.730 630.052  17
   8 -12  -7 3120.70 1019.17  25
  -8 -12   7 4906.57 1196.50   6
   8  12  -7 3067.23 1163.29  31
   8  12  -7 4545.33 1088.01  22
   8 -12  -7 1613.09 786.786  17
  -8 -12   6 2121.90 813.419   6
   8 -12  -6 1537.74 700.506  25
   8  12  -6 1683.15 622.865  22
   8  12  -6 1236.04 820.778  31
   8 -12  -5 6506.82 1586.27  25
  -8 -12   5 6674.76 1436.13   6
   8  12  -5 7239.68 1384.88  22
   8  12  -5 4558.07 1514.93  31
  -8 -12   4 1345.68 611.528   6
   8 -12  -4 1269.38 651.214  25
  -8 -12   4 679.716 1272.45   3
   8  12  -4 2122.28 1022.08  31
  -8 -12   3 273.511 247.783  26
  -8 -12   3-66.1983 213.428   6
  -8 -12   3 176.218 681.810   3
   8 -12  -3 412.801 262.683  25
   8  12  -3 553.410 546.087  31
   8  12  -2 511.032 502.506  31
  -8 -12   2 350.329 202.971   6
   8 -12  -2 1180.01 723.576   3
   8 -12  -2 808.505 547.525  25
  -8  12   2 629.902 661.339  31
  -8 -12   2 342.744 586.494   3
  -8 -12   2 870.900 439.069  26
   8  12  -1-148.517 300.824  31
  -8  12   1 295.660 338.807  31
   8 -12  -1 735.574 536.735  25
  -8 -12   1 547.715 326.881  26
   8 -12  -1-185.697 228.236   3
  -8 -12   1 337.745 60.5624   6
  -8 -12   1-493.875 383.752   3
  -8  12   0 156.465 186.828  31
   8  12   0 1010.50 577.211  31
  -8 -12   0 2660.16 953.474   6
  -8 -12   0 2103.52 752.341  26
   8 -12   0 2032.60 870.097  25
   8 -12   0 390.701 917.028   3
  -8 -12   0 426.033 710.172   3
  -8  12  -1 1755.78 875.328  31
  -8 -12  -1 3774.88 1012.25  26
   8  12   1 864.524 675.897  31
  -8 -12  -1 2085.61 841.593   6
  -8 -12  -1 112.721 599.697   3
   8 -12   1 997.584 776.870   3
   8 -12   1 3489.10 1155.30  25
   8  12   2 267.820 227.568  31
   8 -12   2 787.084 558.356  25
   8 -12   2 604.444 365.006   3
  -8  12  -2-40.4546 310.359  31
  -8 -12  -2 616.843 490.617  26
  -8 -12  -3 5396.51 1235.69  26
   8 -12   3-112.442 901.342   3
   8 -12   3 5337.29 1493.60   9
   8 -12   3 5151.83 1311.90  25
   8  12   3 269.341 381.785  31
  -8  12  -3 2384.84 937.251  31
   8  12   4-186.301 247.540  31
   8 -12   4-124.280 413.717  25
   8 -12   4 684.495 615.626   9
  -8 -12  -4 117.335 259.902  26
   8 -12   4 395.593 218.210   3
  -8  12  -4-41.6910 118.499  31
  -8  12  -5 1031.34 466.710  31
   8 -12   5 412.080 290.617   3
   8 -12   5 1886.25 830.612   9
  -8 -12  -5 1597.00 467.325  18
  -8 -12  -5 1194.22 517.969  26
   8 -12   6-83.7013 316.741   9
  -8 -12  -6-60.6841 223.197  26
  -8 -12  -6-53.4615 176.695  18
  -8 -12  -7-119.213 117.426  18
   8 -12   7 226.821 308.872   9
   9   1 -19 22867.1 3879.00  13
   9   1 -18 1090.95 676.364  13
   9  -1 -18 1418.68 491.908  16
   9   1 -18 1017.80 580.493  15
   9  -1 -18 2148.32 1172.36  14
   9  -1 -18 749.885 365.867  13
   9  -1 -17 22523.7 2689.32  16
   9   1 -17 25101.7 3569.62  14
   9  -1 -17 20908.6 2911.14  14
   9  -1 -17 23513.1 4117.93  13
   9   1 -17 26089.8 4115.54  13
   9   1 -17 21550.7 5066.30  31
   9   1 -16 165.109 449.045  14
   9   1 -16 2.44631 481.910  13
   9  -1 -16-1168.39 1565.10  31
   9   1 -16 841.589 474.560  16
   9  -1 -16-107.503 452.002  16
   9  -1 -16 299.414 380.181  14
   9   1 -16-649.376 1092.42  31
   9  -1 -16-166.810 623.333  13
   9   1 -15 11839.2 2275.26  14
   9  -1 -15 12822.4 2090.10  16
   9   1 -15 13225.1 2139.13  16
   9  -1 -15 10973.0 2045.93  14
   9  -1 -15 14655.8 3044.46  13
   9  -1 -15 12564.2 3791.60  31
   9   1 -15 13341.3 3819.36  31
   9   1 -15 12945.6 2684.40  13
   9  -1 -14 4106.66 1473.13  13
   9   1 -14 4883.14 1497.13  13
   9  -1 -14 3750.47 1063.52  14
   9  -1 -14 4992.97 1247.19  16
   9   1 -14 4301.28 1395.14  32
   9   1 -14 3886.90 1262.34  14
   9   1 -14 3837.01 951.810  16
   9  -1 -14 4548.31 2104.19  31
   9   1 -14 5145.73 2496.33  31
   9   1 -13 14604.4 3619.67  31
   9   1 -13 11047.6 2174.06  13
   9   1 -13 11613.3 1866.72  16
   9  -1 -13 10992.9 1779.23  16
   9   1 -13 11486.6 1967.30  14
   9  -1 -13 11228.1 1815.60  14
   9   1 -13 11716.3 2299.28  32
   9  -1 -13 12274.1 2420.32  13
   9  -1 -13 15071.7 3849.32  31
   9  -1 -12 1686.09 802.944  13
   9   1 -12 2288.90 940.207  13
   9  -1 -12 1207.76 951.827  31
   9  -1 -12 1584.15 1028.58  40
   9   1 -12 1404.30 953.741  40
   9   1 -12 1583.40 621.185  14
   9   1 -12 151.365 1384.98  38
   9   1 -12 1544.09 1146.58  31
   9   1 -11 7682.43 2831.17  38
   9  -1 -11 19349.5 3516.54  40
   9  -1 -11 4910.06 2210.29  38
   9   1 -11 15500.2 3058.16  40
   9  -1 -11 13540.0 4109.95  33
   9  -1 -10 1066.79 734.159  33
   9   1 -10-229.561 635.910  38
   9   1 -10 755.642 580.442  40
   9  -1 -10 582.666 581.628  40
   9  -1 -10 285.240 261.007  38
   9   1 -10-317.834 240.181  37
   9   1  -9 155949. 11210.0  37
   9  -1  -9 72740.4 7581.47  38
   9   1  -9 125505. 7522.64  40
   9   1  -9 62708.8 6971.89  38
   9  -1  -9 134461. 10504.5  33
   9  -1  -9 129149. 7863.38  40
   9  -1  -8 46150.0 4326.40  40
   9  -1  -8 31129.8 4621.99  38
   9   1  -8 57070.6 6067.66  37
   9  -1  -8 48478.3 5838.29  33
   9   1  -8 30976.6 4502.74  38
   9   1  -8 46933.2 4317.67  40
   9   1  -7 174063. 7748.87  40
   9  -1  -7 169889. 7806.71  40
   9   1  -7 147579. 8793.63  38
   9  -1  -7 134203. 8884.98  38
   9  -1  -7 170818. 9938.31  33
  -9   1   6 732.100 562.104  41
   9   1  -6 673.452 612.606  38
   9   1  -6 412.959 629.465  40
   9  -1  -6 323.909 558.111  38
   9   1  -6 829.950 616.199  37
  -9  -1   6 1610.78 636.894  41
   9  -1  -6 2506.82 1121.77  33
   9  -1  -6 658.488 499.009  40
   9   1  -5 42279.4 4192.36  28
   9   1  -5 38376.4 3284.90  40
   9  -1  -5 34073.9 2997.52  40
  -9  -1   5 38078.0 2808.61  41
   9   1  -5 36516.3 3653.05  38
   9  -1  -5 33433.5 3628.33  38
  -9   1   5 32910.6 3166.69  41
   9  -1  -5 32939.6 3469.89  33
   9   1  -5 37487.0 3548.61  37
  -9   1   4 62704.2 5383.64  30
   9   1  -4 73920.3 4841.74  28
  -9   1   4 61955.3 4093.90  41
  -9  -1   4 64105.9 3792.08  41
   9   1  -4 64703.6 4364.56  38
   9  -1  -4 66591.8 4615.55  38
   9  -1  -4 62923.2 3894.17  40
   9  -1  -4 60861.8 4214.21  33
  -9   1   3 56324.9 4616.32  30
   9   1  -3 59657.9 3705.38  28
  -9   1   3 55427.0 3641.71  41
  -9  -1   3 48699.4 3333.69  41
   9   1  -3 60088.4 3775.86  38
   9  -1  -3 55697.0 3605.31  38
   9  -1  -3 55760.8 3520.63  33
   9   1  -2 45678.9 2724.62  28
   9  -1  -2 35049.1 2357.71  33
   9   1  -2 43110.3 1738.04  35
   9  -1  -2 34120.8 2445.49  39
  -9   1   2 38888.9 1754.00  36
   9  -1  -2 42974.1 1686.36   1
   9  -1  -1 241612. 5257.68   1
   9  -1  -1 225634. 5452.05  39
  -9   1   1 259643. 5485.69  36
   9   1  -1 254092. 5160.09  35
   9   1  -1 252995. 5224.28  29
   9  -1  -1 214060. 4970.32  33
   9  -1   0 7084.46 1031.97  30
  -9  -1   0 7456.53 1368.35  41
  -9   1   0 8519.63 1302.15  41
   9  -1   0 5555.62 954.808   1
   9  -1   0 6000.31 970.889  34
  -9   1   0 9032.56 1234.62  36
  -9  -1   0 5410.68 1175.91  36
  -9   1  -1 30334.6 1650.44  28
  -9   1  -1 34912.8 2676.46  36
   9  -1   1 20465.4 2136.45   1
  -9   1  -1 31675.9 2516.14  41
  -9  -1  -1 24058.9 2636.81  36
  -9  -1  -1 34770.7 2728.90  41
  -9  -1  -1 24164.0 1518.74  33
  -9   1  -2 3501.37 648.015  28
  -9  -1  -2 3448.72 788.887  41
  -9   1  -2 3461.80 814.084  41
   9  -1   2 2116.58 750.926   1
  -9   1  -2 4112.60 1027.72  36
  -9  -1  -2 3783.32 1081.80  36
  -9  -1  -2 2693.29 588.306  33
   9   1   3 17705.5 2709.43  30
  -9   1  -3 27705.3 2281.68  28
   9  -1   3 15896.8 2083.27   1
  -9   1  -3 35543.7 2626.20  41
  -9   1  -3 23650.3 1885.25  37
  -9   1  -3 33758.9 3141.88  36
  -9  -1  -3 35963.9 3585.21  36
  -9  -1  -3 22804.7 1996.39  33
  -9  -1  -3 29759.3 2310.94  41
   9   1   4 77264.7 5979.17  30
  -9  -1  -4 117877. 4369.47  41
   9  -1   4 59911.5 4436.20   1
  -9   1  -4 139934. 5273.53  41
   9   1   4 98950.1 5104.22  29
  -9   1  -4 91731.0 4267.91  37
  -9   1  -4 143376. 7034.93  36
  -9  -1  -4 144639. 7758.17  36
  -9  -1  -4 91188.1 4553.24  33
   9   1   5 13632.1 2562.19  30
   9  -1   5 12277.4 2082.05   1
  -9   1  -5 19514.9 2175.19  37
  -9   1  -5 33469.3 3731.37  36
  -9  -1  -5 32260.4 3932.17  36
  -9  -1  -5 18545.4 2219.44  33
  -9   1  -6 15843.2 2805.98  36
  -9  -1  -6 13618.8 2751.71  36
  -9   1  -7 188478. 10264.7  36
  -9  -1  -7 163393. 10265.9  36
   9   1   8 4550.35 1632.17   1
   9  -1   8 2537.02 1212.38   1
  -9   1  -8 6416.47 2059.82  36
  -9  -1  -8 7331.76 2405.37  36
   9   1   9 9395.10 2532.24   1
   9  -1   9 6934.20 1983.43   1
  -9   1  -9 21180.1 4256.80  36
  -9  -1  -9 21706.7 4721.39  36
   9  -1  10 754.572 689.846   1
  -9   1 -10 4843.80 1962.92  36
   9   1  10 979.078 663.710   1
  -9  -1 -10 4050.20 2160.84  36
  -9  -1 -11 2770.18 901.893  27
  -9   1 -11 3856.58 1124.06  16
  -9   1 -11 2641.55 1131.34  19
  -9  -1 -12 334.504 193.410  27
  -9   1 -12 907.866 629.005  19
  -9  -1 -12 333.121 425.110  19
  -9   1 -12 502.364 239.741  16
  -9  -1 -13 6714.57 1530.49  27
  -9  -1 -13 10441.6 2216.72  19
  -9   1 -13 10024.2 2199.44  19
  -9  -1 -13 17072.9 2378.29  16
  -9   1 -13 15325.0 2213.59  16
  -9   1 -14 2588.65 900.465  16
  -9  -1 -14 3400.18 982.918  16
  -9   1 -14 1577.51 856.814  19
  -9  -1 -15 61304.0 4200.10  16
  -9   1 -15 29679.8 3519.01  19
  -9   1 -15 52681.5 3825.91  16
  -9   1 -15 45393.2 4338.59  14
  -9   1 -15 18882.8 2929.18  13
  -9   1 -16 1741.71 881.116  13
  -9   1 -16 4253.68 1249.82  14
  -9   1 -16 2229.33 678.880  16
  -9  -1 -16 3382.20 898.064  16
  -9  -1 -17 26110.8 2087.95  16
  -9   1 -17 28266.0 2769.05  14
  -9  -1 -17 26377.7 2719.96  14
   9   3 -18 2812.59 1255.57  13
   9   3 -18 2788.90 1016.65  15
   9   3 -18 1925.85 1308.42  31
   9   3 -17 19154.8 4692.06  31
   9   3 -17 18730.5 2843.84  15
   9   3 -17 17386.6 3093.81  13
   9   3 -16 2810.75 1217.18  13
   9  -3 -16 3609.35 1083.65  16
   9   3 -16 2692.43 1281.85  15
   9   3 -16 2810.10 1782.90  31
   9  -3 -15 17251.9 2508.85  27
   9   3 -15 19008.2 3107.16  13
   9  -3 -15 18745.9 2445.56  16
   9   3 -15 22939.5 3528.78  14
   9   3 -15 23961.6 5158.18  31
   9  -3 -14-195.617 486.677  12
   9  -3 -14 111.135 258.662  27
   9   3 -14 657.020 703.102  32
   9   3 -14-68.8063 224.726  13
   9   3 -14-74.1743 153.296  14
   9  -3 -14 50.4951 193.978  16
   9   3 -14 179.902 628.054  31
   9  -3 -13 4976.05 1644.87  13
   9   3 -13 3167.53 1094.87  13
   9  -3 -13 2452.43 814.242  12
   9  -3 -13 2957.96 945.453  27
   9  -3 -13 3957.61 1086.79  10
   9   3 -13 2853.20 1361.83  32
   9   3 -13 4695.11 1464.51  14
   9   3 -13 4983.39 2269.08  31
   9  -3 -12 4887.64 1605.98  13
   9   3 -12 4870.91 1321.46  13
   9  -3 -12 1849.57 978.868  12
   9  -3 -12 2447.99 793.381  27
   9  -3 -12 4949.93 1274.82  10
   9   3 -12 4486.63 1087.90  16
   9   3 -12 5317.08 1396.23  14
   9   3 -12 4673.25 2018.08  31
   9  -3 -11 10778.0 4059.52  33
   9  -3 -11 10119.6 2620.05  40
   9   3 -11 6423.97 2882.10  38
   9   3 -11 13743.3 4407.32  37
   9  -3 -10 8080.43 2218.62  40
   9   3 -10 4244.93 2000.74  38
   9   3 -10 10545.0 3457.86  37
   9  -3 -10 10955.6 3794.26  33
   9   3  -9 147091. 13539.6  28
   9   3  -9 88227.3 6246.61  40
   9  -3  -9 98894.3 7227.55  40
   9   3  -9 68295.2 8045.71  38
   9   3  -9 133898. 11629.1  37
   9  -3  -9 104691. 11135.0  33
   9   3  -8 5049.13 2204.19  28
   9   3  -8 2599.91 1282.03  38
   9   3  -8 2639.85 976.786  40
   9  -3  -8 3699.22 1290.72  40
   9  -3  -8 3603.51 1988.30  33
   9  -3  -7 124090. 10684.6  33
   9   3  -7 98191.6 5903.11  40
   9  -3  -7 96961.8 6128.59  40
   9   3  -7 114656. 9126.02  38
   9   3  -6 2754.09 1359.36  28
   9   3  -6 2213.07 1261.37  38
   9   3  -6 1340.93 702.080  40
  -9  -3   6 1802.09 592.111  41
   9  -3  -6 1595.53 751.246  40
   9  -3  -6 1778.86 1378.26  39
   9   3  -6 1361.40 552.080   2
   9  -3  -6 2451.60 1382.69  33
  -9   3   6 1670.99 707.740  41
  -9   3   5 17748.1 1959.47   2
   9  -3  -5 17914.9 2229.34  40
   9   3  -5 17733.0 1915.12   2
   9  -3  -5 22540.3 4258.37  39
  -9  -3   5 19947.2 1896.40  41
   9  -3  -5 22830.3 3999.19  33
   9   3  -4 3289.82 774.086   2
   9  -3  -4 4602.87 1811.61  39
  -9  -3   4 3796.73 839.596  41
  -9   3   4 4070.54 956.879   2
   9  -3  -4 3632.54 907.878  40
   9   3  -4 5874.66 1853.34  29
   9  -3  -4 5173.37 1701.43  33
   9   3  -3 64565.1 6074.49  29
   9  -3  -3 59032.9 6002.31  33
  -9  -3   3 50894.6 3108.61  41
   9  -3  -3 39865.8 2811.78  40
  -9   3   3 52015.4 3611.05   2
   9   3  -3 45808.8 2845.93   2
   9  -3  -2 905.073 83.3201  30
   9   3  -2 678.597 323.543  35
  -9  -3   2 883.111 426.642  41
  -9   3   2 775.011 384.002   2
   9  -3  -2 713.891 359.636  40
   9  -3  -2 41.9732 1280.09  34
   9   3  -2 713.696 361.696   2
   9  -3  -1 91610.9 9056.81  30
   9   3  -1 80487.1 3731.83   2
  -9  -3   1 83421.4 4023.86  41
   9   3  -1 84516.1 3748.27  35
   9  -3  -1 98191.5 8832.67  34
  -9  -3   0 6235.44 1146.95  41
   9   3   0 7147.89 1114.85   2
   9   3   0 7243.58 1219.60  35
  -9  -3   0 4619.86 1557.58  34
  -9  -3  -1 29797.4 4077.89  30
  -9  -3  -1 26850.4 3617.30  34
   9  -3   1 32091.1 2400.14   1
   9   3   1 30043.3 2522.20  35
   9   3   1 32142.3 2375.06   2
  -9  -3  -1 33479.5 2505.57  41
  -9  -3  -2 24987.8 2230.85  41
   9   3   2 23950.2 2099.10   2
  -9   3  -2 27553.1 2571.35  36
   9  -3   2 24989.2 2289.72   1
   9   3   2 21155.2 2239.64  35
  -9   3  -3 83256.6 5484.17  29
  -9  -3  -3 98550.4 4548.85  41
  -9  -3  -3 77238.1 5310.67  39
   9   3   3 93380.0 4295.30   2
  -9   3  -3 99407.0 5901.24   2
  -9   3  -3 90359.2 5157.08  36
   9   3   3 62801.2 4132.23  35
   9  -3   3 90022.0 4686.51   1
  -9  -3  -3 83052.6 5607.25  33
   9  -3   4 8158.71 1516.15   1
  -9   3  -4 6361.01 1071.85  41
  -9   3  -4 8081.99 1725.77   2
  -9  -3  -4 7911.23 1729.15  39
  -9   3  -4 7449.95 1622.17  36
   9   3   4 7227.08 1489.60  35
  -9  -3  -4 9315.86 1899.72  33
  -9   3  -5 2677.74 1090.29  28
  -9   3  -5 2683.53 993.004   2
  -9  -3  -5 2270.17 964.301  33
  -9   3  -5 2703.47 1069.80  36
   9  -3   5 2279.90 847.714   1
   9   3   5 2032.25 812.018  35
  -9   3  -6 1202.45 666.035  28
   9   3   6 1670.13 783.097  35
  -9   3  -6 947.809 535.556   2
  -9   3  -6 1443.77 817.532  36
   9  -3   6 1182.71 655.329   1
  -9   3  -7 32483.0 4149.14  28
   9   3   7 36055.5 3844.39  35
   9  -3   7 25112.8 3245.96   1
  -9   3  -7 35268.0 4482.32  36
   9  -3   8 1093.32 733.481   1
  -9   3  -8 2030.09 1136.50  36
   9   3   8 1999.39 964.316  35
   9   3   9 8160.52 2574.03   1
  -9   3  -9 9251.38 2699.41  36
   9   3   9 8666.26 2099.97  35
  -9  -3 -10 15640.5 1995.84  27
  -9   3 -10 13869.1 2539.01  19
  -9   3 -10 14795.5 2075.12  16
  -9  -3 -10 16945.1 2058.06  18
  -9  -3 -11 602.024 355.623  27
  -9   3 -11 233.096 380.752  19
  -9   3 -11 269.683 374.292  16
  -9  -3 -12 12396.9 1899.22  27
  -9   3 -12 13322.1 2015.97  16
  -9   3 -12 10026.5 2214.13  19
  -9  -3 -13 8878.29 1703.03  27
  -9   3 -13 7981.10 2015.73  19
  -9   3 -13 11507.6 1847.74  16
  -9   3 -14 164.077 463.931  13
  -9  -3 -14-71.5604 320.091  27
  -9   3 -14-440.444 530.523  19
  -9   3 -15 4159.83 1368.75  13
  -9  -3 -15 3626.05 1048.27  27
  -9   3 -16 695.032 569.964  13
  -9  -3 -16 808.084 409.531  27
  -9  -3 -16 1244.89 518.998  16
  -9   3 -16 745.470 465.691  15
  -9  -3 -17 12366.6 1714.88  14
   9  -5 -17 30918.8 3326.62  27
   9   5 -17 34728.4 4074.17  13
   9   5 -17 34699.0 5636.41  31
   9   5 -17 27758.2 3371.25  15
   9   5 -16 2353.04 945.385  13
   9  -5 -16 2637.70 987.833  27
   9   5 -16 2699.54 1166.61  15
   9   5 -16 3614.80 1978.99  31
   9  -5 -15 16690.8 2502.27  27
   9   5 -15 18187.5 2952.53  15
   9   5 -15 16143.1 2688.98  13
   9   5 -15 18670.5 4450.41  31
   9   5 -14-104.989 261.127  13
   9  -5 -14 360.909 480.863  27
   9   5 -14 802.680 794.426  32
   9  -5 -14-95.9642 418.928  11
   9   5 -14 440.766 576.177  31
   9   5 -14-460.755 362.794  15
   9   5 -13 723.390 649.591  13
   9   5 -13-60.5665 421.971  15
   9  -5 -13 1286.87 728.393  11
   9  -5 -13 115.010 257.072  27
   9   5 -13-156.960 992.350  31
   9   5 -12 302.833 217.349  13
   9  -5 -12 794.231 600.073  12
   9  -5 -12 646.758 378.246  27
   9  -5 -12 1188.42 1268.52  17
   9   5 -12 484.851 654.352  15
   9   5 -12 2284.53 1564.36  31
   9  -5 -11 51470.9 4016.36  27
   9  -5 -11 60343.1 5361.53  12
   9   5 -11 72891.2 8096.94  31
   9  -5 -11 58867.3 7744.69  17
   9   5 -11 62303.0 5010.69  15
   9   5 -11 48525.7 3988.89  13
   9  -5 -10 7846.65 1901.09  12
   9   5 -10 6287.46 1470.32  15
   9  -5 -10 6750.25 1512.93  10
   9  -5 -10 5579.25 1268.38  27
   9  -5 -10 9083.01 2720.89  17
   9   5 -10 7660.92 2403.63  31
   9   5  -9 59416.2 8935.99  38
   9  -5  -9 78878.8 11617.2  33
   9   5  -8 20587.1 5592.02  28
   9   5  -8 11846.0 3634.73  38
   9  -5  -8 13191.5 4531.46  33
   9   5  -7 51533.6 8658.08  28
   9  -5  -7 35752.8 7554.35  39
   9   5  -7 40641.0 6670.35  38
   9  -5  -7 37489.6 7400.05  33
   9   5  -6 4024.36 1102.17   2
   9  -5  -6 2369.91 1431.46  39
   9  -5  -6 4791.29 2393.43  33
  -9   5   5 10611.9 1881.96   2
   9  -5  -5 15048.6 4638.80  39
   9   5  -5 9316.80 1607.55   2
   9  -5  -5 14985.9 4268.52  33
   9   5  -4 40335.7 3260.71   2
  -9   5   4 46556.1 3982.75   2
   9   5  -3 12925.3 1768.32   2
  -9   5   3 16098.1 2375.24   2
  -9   5   2 58142.1 4544.95   2
   9   5  -2 46634.0 3359.66   2
   9  -5  -2 67322.9 9696.15  34
  -9   5   1 67048.2 4995.01   2
   9   5  -1 76866.3 4608.69  35
   9   5  -1 54180.9 3615.23   2
   9  -5  -1 73085.7 10451.7  34
   9   5   0 28133.3 2580.42   2
  -9   5   0 34086.3 3570.47   2
   9   5   0 35543.8 3112.03  35
  -9  -5   0 22398.0 4625.40  34
   9  -5   0 28515.4 6473.93  34
  -9   5  -1 286008. 10766.8   2
   9   5   1 306996. 9374.83  35
  -9  -5  -1 269769. 15667.6  34
  -9   5  -2 4325.24 1343.72   2
   9   5   2 3554.89 903.461   2
   9   5   2 4469.91 1161.04  35
  -9  -5  -2 3711.84 1697.55  34
  -9   5  -3 4707.57 1421.24   2
   9   5   3 5194.98 1328.16  35
   9   5   3 4341.57 1028.37   2
  -9   5  -4 374.439 479.739   2
  -9   5  -4 526.784 470.673  36
  -9  -5  -4-513.259 574.072  39
   9   5   4 177.406 193.225   2
   9   5   4 7.36211 195.352  35
  -9  -5  -4 92.0326 483.267  33
  -9   5  -5 42064.2 4574.83   2
   9   5   5 33980.9 3645.73  35
  -9   5  -5 40818.9 4483.33  36
  -9  -5  -5 36016.7 4965.75  33
  -9  -5  -5 32406.7 4591.96  39
  -9   5  -6 16172.3 3321.87  28
  -9   5  -6 17267.7 3284.84  36
  -9  -5  -6 8171.51 2341.49  39
   9   5   6 11407.2 2177.31  35
  -9   5  -7 62729.3 6644.06  36
   9   5   7 44566.7 4497.31  35
  -9  -5  -8 30136.8 2671.67  27
  -9   5  -8 27738.3 3440.04  19
   9   5   8 27633.3 3714.02  35
  -9  -5  -8 34127.0 3015.65  18
  -9  -5  -9 51395.2 3648.02  27
   9  -5   9 40206.2 4256.92   9
  -9   5  -9 48153.3 4798.43  19
  -9  -5 -10 18364.1 2220.48  27
  -9  -5 -10 21722.5 2445.40  18
   9  -5  10 9974.40 2154.99   9
  -9   5 -10 14023.3 2687.57  19
  -9  -5 -11 749.049 524.656  27
  -9   5 -11 491.151 515.745  21
  -9  -5 -11 867.523 503.277  18
  -9   5 -11 176.520 316.573  19
  -9  -5 -12 2721.49 896.450  27
  -9   5 -12 2622.69 1105.96  21
  -9   5 -12 3909.02 1288.28  15
  -9  -5 -13 5270.80 1302.54  27
  -9   5 -13 5053.69 1624.60  21
  -9   5 -13 7264.48 1581.83  15
  -9   5 -14 348.340 511.210  13
  -9  -5 -14-25.2312 154.732  27
  -9   5 -14 223.688 163.138  21
  -9   5 -14 335.153 386.204  15
  -9   5 -15 3002.33 1135.37  13
  -9  -5 -15 2828.84 834.400  27
  -9   5 -16-200.166 431.142  13
  -9  -5 -16 304.991 141.345  27
  -9  -5 -16 272.953 193.145  16
   9  -7 -16 2087.40 774.298  27
   9   7 -16 2115.55 1043.63  31
   9  -7 -15 4383.81 1174.40  27
   9   7 -15 4397.37 1797.24  31
   9   7 -15 5001.19 1416.90  15
   9   7 -14 1374.76 743.499  32
   9  -7 -14 806.833 357.411  27
   9  -7 -14 1232.99 536.176  11
   9   7 -14 1087.09 676.375  15
   9   7 -14 1195.27 720.882  31
   9  -7 -13-306.576 442.707  11
   9   7 -13 276.108 399.382  22
   9  -7 -13 355.790 348.951  27
   9  -7 -13-274.272 689.562  17
   9   7 -13 478.681 707.087  15
   9   7 -13 496.792 601.170  31
   9  -7 -12-21.8498 96.9312  27
   9  -7 -12-41.6243 135.446  11
   9   7 -12-283.594 422.326  15
   9   7 -12-314.679 658.046  31
   9  -7 -11 1986.62 792.213  27
   9  -7 -11 2653.59 1098.11  11
   9  -7 -11 1844.89 998.843  17
   9   7 -11 1832.28 1003.34  15
   9   7 -11 3698.27 2014.97  31
   9  -7 -10 9223.09 1737.50  27
   9  -7 -10 14145.8 2386.68  11
   9  -7 -10 10180.2 3164.86  17
   9   7 -10 12539.2 2364.94  15
   9   7 -10 14938.9 3807.85  31
   9  -7  -9 6170.12 1618.21  11
   9  -7  -9 4579.56 1180.82  27
   9   7  -9 6126.56 1649.87  15
   9   7  -9 8109.63 2714.70  31
   9  -7  -8 5502.04 1259.26  27
   9  -7  -8 6644.71 1723.25  11
  -9  -7   8 6494.60 1500.27   9
   9   7  -8 7331.11 1650.78  15
   9   7  -8 9077.71 2766.55  31
   9  -7  -7 620.580 491.665  27
  -9  -7   7 131.899 249.548   9
   9  -7  -7 90.3957 224.283  11
   9   7  -7 904.258 331.778  31
   9   7  -7 384.863 160.156  15
   9  -7  -6 168.887 342.711  11
   9   7  -6 754.355 498.794   2
   9  -7  -6 2443.35 2164.37  33
   9   7  -5 454.218 406.632   2
   9  -7  -5-952.621 2316.38  33
  -9   7   4 3357.61 1307.37   2
   9  -7  -4 1470.90 492.477  33
   9   7  -4 2899.09 977.254   2
   9   7  -3 4762.27 1280.04   2
  -9   7   3 5775.23 1670.53   2
  -9   7   2 8709.09 2107.79   2
   9   7  -2 6516.29 1498.32   2
   9  -7  -2 8350.56 4112.01  34
   9   7  -1 24493.4 2862.67   2
  -9   7   1 33414.8 4260.84   2
   9  -7  -1 32109.0 7474.74  34
  -9  -7   1 20982.1 5489.69  34
  -9   7   0 11943.5 2565.28   2
   9   7   0 7676.44 1611.05   2
  -9  -7   0 9919.91 3661.54  34
   9  -7   0 9255.45 4252.33  34
  -9   7  -1 16572.6 3113.95   2
   9   7   1 12275.0 2034.38   2
   9   7   1 16121.5 2616.50  35
  -9  -7  -1 15633.5 4381.73  34
   9  -7   1 11268.6 4592.15  34
   9   7   2 14014.0 2402.49  35
  -9   7  -2 15538.8 3080.47   2
   9   7   2 10870.6 1910.31   2
  -9  -7  -2 11709.4 3746.39  34
  -9   7  -3 7187.69 2120.37   2
   9   7   3 5361.21 1510.33  35
   9   7   3 5691.59 1395.57   2
  -9   7  -4 1191.37 806.708   2
   9   7   4 708.677 428.533   2
  -9   7  -4 358.139 188.043  36
   9   7   4 931.599 543.664  35
  -9  -7  -5 7403.30 1463.81  26
   9  -7   5 7533.75 1769.12   9
  -9   7  -5 7794.94 1788.66  21
  -9  -7  -6 23565.8 2798.89  26
  -9   7  -6 25775.8 3450.15  21
   9  -7   6 22680.7 3171.65   9
  -9  -7  -7 2468.16 850.205  27
  -9   7  -7 1265.27 709.930  21
   9  -7   7 2039.22 988.878   9
  -9  -7  -7 1398.30 636.425  26
  -9  -7  -8 6900.47 1424.35  27
   9  -7   8 5442.58 1597.51   9
  -9  -7  -8 2998.04 1100.32  26
  -9   7  -8 6048.91 1747.49  21
  -9  -7  -8 6629.35 1297.66  18
  -9  -7  -9 23653.1 2590.70  27
  -9   7  -9 19722.7 3334.22  21
   9  -7   9 16525.2 2829.15   9
  -9  -7  -9 25092.8 2711.00  18
  -9  -7 -10 4961.36 1207.37  27
   9  -7  10 3443.13 1281.28   9
  -9   7 -10 5708.36 1748.03  21
  -9  -7 -10 6370.38 1285.75  18
  -9  -7 -11 4397.58 1126.13  27
   9  -7  11 2796.85 1104.10   9
  -9   7 -11 4664.88 1689.06  21
  -9  -7 -11 5917.93 1154.04  18
  -9  -7 -12 836.579 482.039  27
   9  -7  12-217.288 566.946   9
  -9   7 -12 833.841 804.052  21
  -9   7 -13-351.762 540.310  13
  -9   7 -13 5.77990 443.422  21
  -9  -7 -13 359.434 264.081  27
  -9   7 -14-286.017 483.079  13
  -9  -7 -14 141.300 133.760  27
   9  -9 -14 1994.88 675.851  27
   9   9 -14 2451.12 1247.33  31
   9  -9 -13-183.655 260.351  27
   9  -9 -13 344.720 16.5013  11
   9   9 -13-283.425 399.524  22
   9   9 -13-174.660 435.610  31
   9  -9 -12 436.004 420.785  11
   9  -9 -12 83.0126 190.070  27
   9   9 -12 698.975 464.570  22
   9  -9 -12 150.883 791.186  17
   9   9 -12 527.232 652.220  31
   9  -9 -11 2491.41 853.831  11
   9  -9 -11 1524.51 1377.58  17
   9  -9 -11 2487.52 871.410  27
   9   9 -11 2196.04 1256.51  31
   9  -9 -10 4527.18 1202.64  27
   9  -9 -10 5878.60 1476.41  11
  -9  -9  10 4668.02 1202.52   6
   9  -9 -10 2499.12 1320.13  17
   9   9 -10 6032.45 2067.79  31
   9  -9  -9 7436.06 1487.06  27
   9  -9  -9 10680.3 2078.29  11
   9   9  -9 11280.8 3112.06  31
   9  -9  -9 5943.30 2314.88  17
   9  -9  -8 1806.94 731.537  27
   9  -9  -8 1629.66 768.617  11
   9   9  -8 3337.64 1544.74  31
   9  -9  -7 6309.92 1353.18  27
   9  -9  -7 7673.00 1869.12  11
   9  -9  -7 5883.18 1532.89  25
   9   9  -7 10647.3 2980.21  31
   9  -9  -6 1741.05 799.906  24
   9  -9  -6 1058.95 701.297  11
   9   9  -6 1210.62 1032.57  31
   9   9  -5 1375.86 943.049  31
   9  -9  -5 121.628 320.049  11
   9  -9  -5 1773.15 710.356   3
   9  -9  -5 234.778 166.204  24
   9   9  -4 655.012 644.114  31
   9  -9  -4 162.008 127.732  11
   9  -9  -4-955.847 2336.96   3
   9  -9  -4 374.544 455.744  24
  -9  -9   3 13134.2 2010.65   6
   9  -9  -3 7227.28 1944.86  11
  -9  -9   3 15777.4 2268.66  25
   9  -9  -3 14200.2 2234.23  24
   9  -9  -3 8322.49 2715.96   3
   9   9  -3 21636.1 4170.18  31
  -9  -9   2 7511.38 1497.92   6
   9  -9  -2 3443.63 1290.00  11
   9  -9  -2 4005.07 1496.73   3
  -9  -9   2 8171.28 1637.43  25
   9  -9  -2 8727.24 1751.63  24
  -9  -9   1 40324.8 3556.40   6
  -9  -9   1 40040.7 3718.53  25
   9  -9  -1 37401.3 3649.11  24
  -9  -9   0 24015.1 2796.02   6
  -9  -9   0 24950.5 2880.41  25
   9  -9   0 25472.0 3232.79   9
   9  -9   0 23603.0 2945.40  24
  -9  -9  -1 14517.7 2227.45   6
  -9  -9  -1 13181.7 2152.19  25
   9  -9   1 13256.5 2224.25  24
   9  -9   1 13306.7 2368.07   9
  -9  -9  -1 6016.42 1415.14   3
  -9  -9  -2 13792.6 2255.26   6
  -9  -9  -2 15705.9 2361.91  25
   9  -9   2 13863.8 2275.55  24
  -9  -9  -2 6396.10 1926.47   3
   9  -9   2 14438.7 2487.97   9
  -9   9  -2 11733.0 2449.36  31
  -9   9  -3 383.546 442.770  31
  -9  -9  -3 857.006 453.476   6
  -9  -9  -3 569.718 423.055  26
  -9  -9  -3 656.027 458.996  25
   9  -9   3 1073.75 691.536  24
  -9  -9  -3-447.073 712.474   3
   9  -9   3 451.478 290.134   9
  -9   9  -4 517.053 632.604  31
  -9  -9  -4-28.6372 225.757  26
   9  -9   4 217.314 225.352   9
  -9  -9  -4 84.5238 1083.34   3
  -9  -9  -5 12072.4 2040.38  26
  -9   9  -5 12942.1 2550.19  21
   9  -9   5 12435.3 2444.14   9
  -9   9  -5 11839.2 2264.94  31
  -9  -9  -6 13868.1 2243.55  26
  -9   9  -6 17969.4 3075.20  21
   9  -9   6 16245.8 2844.81   9
  -9   9  -6 14022.6 2380.67  31
  -9  -9  -7 12870.2 2212.67  26
  -9   9  -7 21392.2 3445.13  21
   9  -9   7 19564.7 3152.53   9
  -9   9  -7 15885.9 2408.03  31
  -9   9  -8 14643.1 2797.75  21
   9  -9   8 12036.2 2442.12   9
  -9  -9  -8 15024.3 1959.44  18
  -9  -9  -9 19936.3 2339.83  27
  -9   9  -9 19639.5 3261.91  21
   9  -9   9 14162.2 2588.86   9
  -9  -9  -9 23550.9 2398.51  18
   9  -9  10 1140.01 651.580   9
  -9  -9 -10 2153.28 758.630  27
  -9  -9 -10 1909.43 612.922  18
   9  -9  11 1348.83 653.872   9
  -9  -9 -11 2384.97 749.085  27
  -9  -9 -12 311.745 95.9688  27
   9  -9  12-403.712 364.398   9
   9 -11 -11 570.200 364.857  17
   9  11 -11 165.534 47.7714  22
   9  11 -11 314.286 571.503  31
   9 -11 -10 2182.98 684.837  11
  -9 -11  10 3200.58 913.901   6
   9  11 -10 3718.98 1052.30  22
   9 -11 -10 306.107 423.716  17
   9  11 -10 2450.16 948.630  31
   9 -11  -9-217.398 375.927  11
  -9 -11   9 348.689 407.319   6
   9 -11  -9-773.050 785.921  17
   9  11  -9 413.114 398.549  22
   9  11  -9 767.781 864.692  31
   9 -11  -8 4627.94 1178.58  11
   9  11  -8 6718.50 1394.68  22
  -9 -11   8 6832.43 1503.62   6
   9 -11  -8 1992.87 756.088  17
   9  11  -8 6944.86 2019.62  31
   9 -11  -7-152.998 222.949  11
   9 -11  -7 107.905 131.222  25
  -9 -11   7-73.1593 256.980   6
   9  11  -7-29.7460 228.564  22
   9 -11  -6 1952.79 851.096  11
   9 -11  -6 2141.50 909.357  25
  -9 -11   6 1919.95 732.824   6
   9  11  -6 1712.72 1066.79  31
   9 -11  -5 97.3652 380.355  11
   9 -11  -5 216.560 25.0168  25
  -9 -11   5 1.36280 95.5152   6
   9  11  -5 383.874 254.773  22
   9  11  -5 7.27047 284.225  31
   9 -11  -4 1037.07 565.000  25
   9  11  -4 868.871 443.764  22
   9 -11  -4 709.960 741.448  11
  -9 -11   4 776.341 579.110   6
   9  11  -4 1289.28 938.360  31
   9  11  -3 816.376 261.233  31
  -9 -11   3 2012.47 814.531   6
   9 -11  -3 2454.08 973.609  25
   9 -11  -3-94.0936 1647.26   3
   9  11  -2 7732.15 2166.20  31
  -9 -11   2 9413.36 1832.20   6
   9 -11  -2 3905.53 1584.35   3
  -9 -11   1 5650.45 1417.99   6
   9  11  -1 3690.74 1575.54  31
   9 -11  -1 2463.59 1752.56   3
  -9 -11   1 2809.55 1336.49   3
  -9 -11   0 4977.50 1216.09  26
  -9 -11   0 4942.95 1358.29   6
   9 -11   0 3656.17 1580.22   3
  -9 -11   0 684.249 305.097   3
  -9  11   0 3768.05 1464.98  31
   9  11   0 2937.69 1390.16  31
  -9  11  -1 1031.35 702.393  31
  -9 -11  -1 2017.63 864.465   6
  -9 -11  -1 2778.20 924.959  26
  -9 -11  -1 662.566 266.678   3
   9 -11   1 480.659 581.646   3
   9 -11   1 1611.12 770.005   9
  -9 -11  -2 696.257 698.926   6
  -9  11  -2 886.030 752.809  31
  -9 -11  -2 920.652 519.967  26
  -9 -11  -2 2419.28 1722.57   3
   9 -11   2 207.503 1779.70   3
   9 -11   2 1157.22 657.586   9
  -9 -11  -3 1307.33 681.989  26
   9 -11   3 885.868 655.855   9
  -9  11  -3 466.834 506.187  31
  -9 -11  -4 228.535 344.204  26
  -9  11  -4 248.893 380.988  31
   9 -11   4 120.023 382.888   9
  -9 -11  -5 67.7733 124.893  26
   9 -11   5-101.911 313.569   9
  -9  11  -5 384.769 329.050  31
  -9 -11  -6 962.131 532.998  26
   9 -11   6 2685.37 1075.53   9
  -9 -11  -6 2794.53 672.009  18
  -9  11  -6 1585.25 684.831  31
  -9 -11  -7 330.254 497.270  26
   9 -11   7 1028.93 673.319   9
  -9 -11  -7 917.164 450.562  18
  -9 -11  -8 2627.56 612.709  18
   9 -11   8 2180.26 953.153   9
  -9 -11  -9 1380.47 355.994  18
   9 -11   9 422.734 417.312   9
  -9 -13   4 420.224 377.244   6
   9 -13  -4 278.426 290.605  25
  -9 -13   3 1757.77 702.941   6
   9 -13  -3 1993.44 788.998  25
  -9 -13   2 487.787 418.500   6
   9 -13  -2 314.778 277.471  25
  -9 -13   2 45.1885 113.280   3
  -9 -13   2 618.509 363.518  26
  -9 -13   1 1032.55 593.289   6
  -9 -13   1 2748.94 728.316  26
   9 -13  -1 3508.44 991.351  25
  -9 -13   0 1494.47 604.026  26
   9 -13   0 1746.77 676.030  25
  -9 -13  -1 1003.95 465.708  26
   9 -13   1 583.613 397.526  25
  -9 -13  -2 729.455 397.648  26
  10   0 -19-313.144 1063.82  13
  10   0 -18 45933.2 5817.52  13
  10   0 -17 301.798 768.374  13
  10   0 -17-157.595 245.605  16
  10   0 -17 96.6972 256.589  14
  10   0 -17-31.9430 1092.25  31
  10   0 -16 11241.4 2576.66  13
  10   0 -16 9683.39 1738.09  16
  10   0 -16 10972.2 2073.88  14
  10   0 -16 12248.6 3555.48  31
  10   0 -15-516.059 484.536  13
  10   0 -15 189.767 112.408  16
  10   0 -15-275.784 389.816  14
  10   0 -15 1.41926 651.527  31
  10   0 -14 171.843 210.297  13
  10   0 -14 433.074 515.658  14
  10   0 -14 276.316 218.184  16
  10   0 -14 37.8644 564.855  31
  10   0 -13-44.1203 425.292  13
  10   0 -13-74.2074 205.436  14
  10   0 -13-14.0273 360.351  16
  10   0 -13-188.537 567.973  32
  10   0 -13 32.3900 641.989  31
  10   0 -12 3183.00 1095.63  13
  10   0 -12 2104.86 966.641  32
  10   0 -12 3295.66 956.605  14
  10   0 -12 2228.25 1338.62  40
  10   0 -12 1369.43 1657.08  38
  10   0 -12 2745.61 1395.21  31
  10   0 -11 183.393 437.948  38
  10   0 -11-61.8701 671.603  40
  10   0 -10 54234.6 5563.72  40
  10   0 -10 39287.0 6311.53  38
  10   0  -9 87.0534 338.596  40
  10   0  -9 21.7446 632.882  38
  10   0  -8 165124. 8432.39  40
  10   0  -8 155721. 10193.9  38
  10   0  -8 152498. 9489.68  33
  10   0  -7-149.011 65.8775  40
  10   0  -7 84.2367 299.267  37
  10   0  -7 222.741 273.822  38
  10   0  -7-182.305 522.674  33
 -10   0   6 3574.19 1310.63  29
  10   0  -6 3797.70 1266.68  40
 -10   0   6 647.860 539.848  41
  10   0  -6 2477.62 1122.94  38
  10   0  -6 2844.15 1174.90  37
 -10   0   5-41.7181 371.976  29
 -10   0   5-19.0060 145.796  41
  10   0  -5-8.27124 138.989  40
  10   0  -5-638.336 453.637  38
  10   0  -5-46.9690 82.2959  37
  10   0  -5 8.43631 101.538  33
 -10   0   4 249204. 8199.36  29
  10   0  -4 260150. 8142.78  38
  10   0  -4 227661. 7233.43  37
  10   0  -4 207772. 6597.90  33
 -10   0   4 232521. 8174.19  41
 -10   0   3 143.516 168.586  29
  10   0  -3 202.587 226.749  38
 -10   0   3-171.373 197.892  41
  10   0  -2 438952. 7497.20  38
  10   0  -2 382073. 4203.89  35
  10   0  -1-262.267 135.389  38
 -10   0   1 96.8609 131.146  36
 -10   0   0 142421. 5772.79  41
 -10   0   0 136178. 5050.68  36
 -10   0  -1 125.466 204.017  36
 -10   0  -1-89.9548 218.491  41
 -10   0  -2 83348.9 4754.25  36
 -10   0  -2 77134.9 4285.46  41
 -10   0  -3 178.867 172.446  36
 -10   0  -3-155.386 221.262  41
 -10   0  -4 255007. 9818.18  36
 -10   0  -4 98898.9 4665.13  41
  10   0   5 105.810 220.734   1
 -10   0  -5-95.7671 372.237  36
  10   0   6 160421. 8660.77   1
 -10   0  -6 273962. 12057.6  36
  10   0   7 30.6021 197.820   1
 -10   0  -7 381.740 436.058  36
  10   0   8 65449.1 6234.08   1
 -10   0  -8 175964. 11471.4  36
  10   0   9-505.839 718.503   1
 -10   0  -9-193.681 641.118  36
 -10   0 -10 15056.4 3771.97  36
 -10   0 -11-131.297 498.766  19
 -10   0 -11-764.954 466.060  16
 -10   0 -12 4312.36 1107.46  16
 -10   0 -12 3059.73 1297.30  19
 -10   0 -13 84.7730 288.149  19
 -10   0 -13-154.129 217.674  16
 -10   0 -14 61819.0 5473.13  19
 -10   0 -14 96794.1 5389.94  16
 -10   0 -15-36.2918 148.456  16
 -10   0 -15 533.123 309.533  19
 -10   0 -16 52619.4 3299.55  16
 -10   0 -16 53149.6 4237.54  14
 -10   0 -17-617.929 360.596  14
  10   2 -19 1739.86 963.170  13
  10   2 -18 25651.3 3033.12  15
  10   2 -18 29593.2 5451.17  31
  10  -2 -18 22619.9 2676.41  14
  10   2 -18 28353.6 4267.11  13
  10  -2 -17-35.9021 174.353  13
  10   2 -17 656.494 270.349  13
  10   2 -17 552.858 416.509  15
  10  -2 -17 308.739 239.208  14
  10   2 -17-584.042 1336.04  31
  10   2 -16 10694.6 2476.14  13
  10  -2 -16 8654.40 1618.03  16
  10   2 -16 11287.9 2397.60  14
  10  -2 -16 8569.65 1678.75  14
  10   2 -16 12078.6 3701.55  31
  10  -2 -16 12987.7 3198.99  13
  10  -2 -15 7331.79 2176.27  13
  10   2 -15 6149.33 1783.38  13
  10  -2 -15 5104.20 1683.40  12
  10   2 -15 6732.32 1747.52  14
  10   2 -15 8936.33 3117.62  31
  10  -2 -15 5575.22 1298.29  16
  10  -2 -15 5963.21 1350.76  14
  10   2 -15 6012.44 1641.56  32
  10  -2 -14 1077.27 299.802  13
  10   2 -14 1449.99 875.093  13
  10  -2 -14 1269.15 495.085  14
  10  -2 -14 1872.61 769.991  10
  10   2 -14 1565.48 700.217  16
  10   2 -14 1715.02 863.158  14
  10   2 -14 1366.10 929.494  32
  10  -2 -14 161.742 1070.58  31
  10  -2 -14 2022.61 1150.30  12
  10   2 -14 1304.36 437.892  31
  10  -2 -13 4121.08 1459.70  13
  10  -2 -13 2774.97 964.830  10
  10   2 -13 2446.49 996.635  13
  10   2 -13 3464.20 969.681  16
  10   2 -13 3767.02 1124.85  14
  10   2 -13 2524.85 1055.46  32
  10  -2 -13 3474.01 1750.49  31
  10   2 -13 4427.81 2046.52  31
  10  -2 -13 2294.49 732.854  14
  10  -2 -12 9701.97 2108.05  13
  10  -2 -12 7036.70 1396.56  10
  10   2 -12 3797.98 1151.48  13
  10   2 -12 6556.51 1315.71  16
  10   2 -12 6927.40 1483.57  14
  10   2 -12 3436.57 1226.70  32
  10  -2 -12 10280.5 2898.60  31
  10   2 -12 9797.51 2740.47  31
  10   2 -11 4478.92 1685.87  40
  10  -2 -11 3907.22 1672.10  40
  10   2 -11 2294.90 1551.47  38
  10   2 -11 4826.09 2378.71  37
  10  -2 -11 3281.48 1976.32  33
  10   2 -10 38877.1 4624.91  40
  10   2 -10 29663.1 5442.54  38
  10   2 -10 51249.3 7206.21  37
  10  -2 -10 41170.6 4976.06  40
  10  -2 -10 32149.6 5955.82  33
  10   2  -9 20086.2 3081.36  40
  10  -2  -9 20509.6 3254.72  40
  10   2  -9 26573.4 4723.45  37
  10  -2  -9 20933.2 4391.43  33
  10   2  -9 19315.8 4003.70  38
  10   2  -8 42791.5 4284.24  40
  10  -2  -8 42364.7 4344.81  40
  10   2  -8 44417.8 5592.51  38
  10   2  -8 55234.6 6210.56  37
  10  -2  -8 41596.5 5733.38  33
  10   2  -7 44111.5 5651.01  28
  10   2  -7 33263.6 3526.12  40
  10  -2  -7 32047.0 3534.19  40
  10   2  -7 38976.3 4908.42  38
  10   2  -7 41221.6 4895.38  37
  10  -2  -7 35474.9 4879.74  33
  10   2  -6 89628.0 7224.68  28
 -10  -2   6 79360.7 3920.20  41
  10  -2  -6 67399.0 4758.37  40
  10   2  -6 73640.1 5024.12  40
  10   2  -6 96146.8 7047.32  38
 -10   2   6 67695.7 5038.73  41
  10  -2  -6 69513.6 6229.95  33
 -10   2   5 63896.5 6879.42  30
  10   2  -5 110681. 7260.89  28
  10   2  -5 116143. 7210.13  38
 -10  -2   5 97576.0 4538.27  41
  10  -2  -5 78292.4 4774.25  40
  10  -2  -5 78620.5 6131.72  33
 -10   2   5 85766.2 5173.70  41
 -10   2   4 85095.0 7596.87  30
  10   2  -4 135301. 7507.04  29
  10   2  -4 146340. 7631.48  28
 -10   2   4 121987. 5775.50  41
 -10  -2   4 143351. 5615.99  41
  10  -2  -4 123034. 7332.84  39
  10   2  -4 117267. 4898.82   2
  10  -2  -4 114741. 6794.84  33
  10  -2  -4 105725. 5195.75  40
  10   2  -3 57242.3 4365.27  29
  10  -2  -3 46735.8 3303.79  40
  10   2  -3 42451.9 2880.22   2
  10  -2  -3 47897.6 4248.23  39
 -10  -2   3 54684.6 3497.44  41
  10  -2  -3 43774.4 3826.62  33
 -10   2   3 52893.5 3495.08  41
  10   2  -2 43920.6 3511.02  29
 -10   2   2 38458.1 2857.29  41
  10   2  -2 35067.0 2094.91  35
  10  -2  -2 35349.0 3438.51  39
  10   2  -2 35271.0 2542.96   2
  10  -2  -2 31153.4 3040.25  33
 -10  -2   2 40387.4 3006.74  41
  10  -2  -1 40941.2 2226.65   1
  10  -2  -1 40507.3 3899.69  30
 -10   2   1 42161.5 2850.33  41
  10   2  -1 39988.3 2462.86  35
  10  -2  -1 39353.5 3753.60  34
  10   2  -1 36203.7 2548.37   2
 -10  -2   1 42329.7 3076.88  41
 -10  -2   0 31723.7 3250.04  30
  10  -2   0 50128.7 4703.53  30
  10   2   0 43394.1 2768.17  35
  10   2   0 52017.7 3110.06   2
 -10   2   0 52013.2 2903.14  36
  10  -2   0 52275.2 2781.96   1
 -10  -2   0 34398.0 3174.31  34
  10  -2   0 46639.0 4607.04  34
 -10  -2   0 59522.1 3630.51  41
 -10   2   0 51211.4 3125.32  41
  10   2   1 403.601 178.222  35
  10  -2   1 643.058 403.193   1
 -10   2  -1 327.846 280.393  41
 -10  -2  -1 1155.96 538.377  41
 -10   2  -1 146.567 174.076  36
 -10  -2  -1 213.496 305.134  36
 -10   2  -2 8852.00 1289.18  29
  10  -2   2 10426.7 1517.17   1
 -10   2  -2 10374.0 1435.95  41
 -10  -2  -2 13200.0 1643.26  41
 -10  -2  -2 8330.59 1288.23  39
 -10   2  -2 11822.8 1758.70  36
 -10  -2  -2 6478.59 1554.98  36
 -10  -2  -2 9396.50 1383.66  33
 -10   2  -3 2352.69 724.878  28
 -10   2  -3 1889.69 599.709  41
 -10  -2  -3 4935.17 1039.41  41
  10  -2   3 2500.94 871.445   1
 -10   2  -3 2347.64 786.155  36
 -10  -2  -3 2196.22 1002.62  36
 -10  -2  -3 3508.13 890.485  33
 -10   2  -4 75610.3 4521.93  28
 -10   2  -4 74931.4 5219.66  36
 -10  -2  -4 72613.0 5964.83  36
 -10   2  -4 68936.3 3878.16  41
  10  -2   4 62167.8 4326.94   1
 -10   2  -5 2356.84 906.543  28
  10  -2   5 1399.83 635.849   1
 -10   2  -5 2341.12 946.701  36
 -10  -2  -5 2320.57 1110.93  36
 -10   2  -6 110604. 6764.70   2
 -10  -2  -6 121436. 8392.09  36
 -10   2  -6 130724. 7968.69  36
  10  -2   7 2521.62 1083.21   1
 -10   2  -7 5866.01 1747.44  36
 -10  -2  -7 6046.52 1966.44  36
  10   2   8 8659.29 2376.74   1
 -10   2  -8 6798.88 2101.02  36
 -10  -2  -8 6479.50 2188.58  36
  10  -2   8 2287.95 1156.29   1
  10   2   9 917.060 542.898   1
 -10  -2  -9 1356.98 1127.56  36
  10  -2   9 993.124 837.824   1
 -10   2  -9 2311.27 1405.84  36
 -10  -2 -10 5786.04 1235.97  27
 -10   2 -10 5221.28 1553.24  19
 -10  -2 -11 1795.70 665.617  27
 -10   2 -11 1323.92 882.330  19
 -10   2 -11 1431.53 595.372  16
 -10  -2 -12 18399.5 2364.80  27
 -10   2 -12 17794.8 3045.91  19
 -10   2 -12 24313.3 2731.96  16
 -10  -2 -12 15956.8 3047.01  19
 -10  -2 -13 89.5990 199.233  27
 -10   2 -13 451.032 204.684  19
 -10   2 -13-224.016 345.060  16
 -10  -2 -14 15286.3 2251.83  27
 -10   2 -14 23552.0 3424.46  19
 -10   2 -14 32161.8 2913.38  16
 -10  -2 -14 40703.0 3557.71  16
 -10   2 -14 32829.9 3654.60  14
 -10   2 -14 12434.2 2420.39  13
 -10   2 -15-33.0874 301.227  13
 -10  -2 -15-436.810 399.060  27
 -10  -2 -15 73.5861 136.037  16
 -10   2 -15-145.231 467.896  14
 -10   2 -16 1935.30 962.923  13
 -10  -2 -16 2695.02 735.180  16
 -10  -2 -17-151.601 361.765  14
  10   4 -18 41770.6 6048.42  31
  10   4 -18 34818.5 3436.23  15
  10   4 -18 42762.0 4795.68  13
  10   4 -17 4257.54 1486.79  13
  10   4 -17 3548.48 1198.16  15
  10   4 -17 5401.21 2545.38  31
  10  -4 -16 15809.8 2416.77  27
  10   4 -16 20558.5 3201.86  13
  10   4 -16 19061.2 2867.04  15
  10   4 -16 26289.1 5386.87  31
  10  -4 -15 12535.9 2173.10  27
  10  -4 -15 14108.3 2146.06  11
  10   4 -15 12513.7 2300.57  15
  10   4 -15 12129.7 2500.87  32
  10   4 -15 12952.5 2516.39  13
  10   4 -15 17178.3 4342.38  31
  10   4 -14 760.116 546.071  13
  10  -4 -14 549.329 418.426  27
  10   4 -14 214.990 274.416  32
  10  -4 -14-82.8258 296.672  12
  10   4 -14 332.331 187.871  15
  10   4 -14 1538.83 1449.35  31
  10  -4 -13 9030.95 1783.60  27
  10  -4 -13 8533.31 2078.78  12
  10   4 -13 9422.64 1895.48  15
  10   4 -13 5811.75 1848.87  32
  10   4 -13 8993.35 1883.21  13
  10   4 -13 12599.7 3405.71  31
  10  -4 -12 17854.5 2404.64  27
  10  -4 -12 10464.5 2243.85  12
  10  -4 -12 23371.9 2909.65  10
  10  -4 -12 27520.2 5253.84  17
  10   4 -12 23871.9 2980.87  15
  10   4 -12 28562.4 5055.72  31
  10   4 -12 18071.9 2559.30  13
  10   4 -11 760.177 378.087  13
  10  -4 -11 1560.74 876.933  12
  10  -4 -11 630.334 268.732  27
  10  -4 -11 945.314 555.216  10
  10   4 -11 1732.71 1175.68  31
  10  -4 -11 614.886 473.536  17
  10   4 -11 965.581 389.097  15
  10   4 -10 118082. 13768.4  28
  10   4 -10 69061.5 9143.42  38
  10  -4 -10 84928.9 7803.63  40
  10   4 -10 109052. 11963.2  37
  10  -4 -10 73643.8 10263.5  33
  10   4  -9 7241.19 3089.63  28
  10  -4  -9 4821.27 1634.36  40
  10   4  -9 7900.29 3024.67  37
  10   4  -9 6680.10 2770.58  38
  10  -4  -9 4005.48 1828.08  33
  10   4  -8 49053.3 7667.20  28
  10  -4  -8 33678.6 4168.83  40
  10  -4  -8 34063.5 6362.70  33
  10   4  -8 39806.9 6233.18  38
  10   4  -7 2705.13 1550.37  28
 -10   4   7 3158.94 1271.62  41
  10   4  -7 2888.48 1614.91  38
  10  -4  -7 1534.51 765.068  40
  10  -4  -7 2435.69 1277.99  33
  10   4  -6 5009.42 2283.25  28
  10   4  -6 2259.79 753.091   2
  10   4  -6 2394.39 896.104  40
  10  -4  -6 3390.08 1831.88  39
  10  -4  -6 2932.79 1675.92  33
  10  -4  -6 2610.88 956.130  40
 -10   4   5 15127.8 2050.34   2
  10  -4  -5 19543.2 4327.15  39
  10   4  -5 14367.7 1875.15   2
  10  -4  -5 16298.6 2262.86  40
 -10  -4   5 17176.2 2112.74  41
  10  -4  -5 17207.8 3740.42  33
 -10   4   4 12823.9 1951.14   2
 -10  -4   4 15784.4 2126.49  41
  10  -4  -4 10898.7 1696.28  40
  10  -4  -4 17764.2 4026.44  39
  10  -4  -4 14579.7 3314.18  33
  10   4  -4 12765.4 1733.26   2
 -10   4   3 34308.0 3285.33   2
 -10  -4   3 36818.5 3025.75  41
  10  -4  -3 30423.7 2561.81  40
  10   4  -3 31304.7 2585.35   2
 -10  -4   2 134518. 5832.26  41
 -10   4   2 123557. 6383.59   2
  10   4  -2 143118. 5732.22  35
  10  -4  -2 138063. 11511.5  34
 -10  -4   1 37433.3 3030.93  41
 -10   4   1 38413.1 3626.76   2
  10   4  -1 31541.6 2554.51   2
  10   4  -1 35442.2 2807.33  35
  10  -4  -1 37447.6 6069.43  34
 -10  -4   0 19505.5 3966.04  30
 -10   4   0 42236.2 3909.04   2
 -10  -4   0 44007.3 3385.03  41
  10   4   0 40358.6 2845.37   2
  10   4   0 40191.9 3146.17  35
 -10  -4   0 24880.0 4082.16  34
  10  -4   0 30984.7 5830.08  34
  10   4   1 8703.05 1350.52   2
 -10   4  -1 8753.98 1814.65   2
  10   4   1 9837.40 1633.55  35
 -10  -4  -1 7073.68 2072.91  34
 -10  -4  -1 11037.1 1713.55  41
 -10   4  -2 8606.55 1803.23   2
  10   4   2 7280.77 1242.66   2
 -10   4  -2 8136.28 1450.75  36
  10   4   2 7161.35 1417.56  35
 -10   4  -3 729.130 505.584   2
  10   4   3 537.513 342.931   2
 -10  -4  -3 982.634 547.521  39
 -10   4  -3 755.190 562.535  36
  10   4   3 296.774 167.674  35
 -10  -4  -3 1203.20 671.056  33
  10   4   4 53057.5 3635.19   2
 -10   4  -4 52573.4 4818.76   2
 -10  -4  -4 44752.3 4536.63  39
 -10   4  -4 52699.6 4530.13  36
  10   4   4 41290.5 3776.28  35
 -10   4  -5 1287.49 804.755  28
 -10   4  -5 1022.56 699.518   2
 -10  -4  -5 1785.71 923.333  39
 -10   4  -5 608.215 406.473  36
  10   4   5 1772.23 890.069  35
 -10   4  -6 96390.7 6852.95   2
 -10   4  -6 91679.6 7107.21  36
  10   4   6 89192.4 6007.65  35
 -10   4  -7 350.730 488.603  36
  10   4   7 1294.29 833.292  35
 -10   4  -8 37287.7 5127.66  36
  10   4   8 24528.9 3460.44  35
 -10  -4  -9 5595.84 1189.04  27
 -10   4  -9 5889.77 1443.41   7
 -10   4  -9 3038.16 1059.14  19
 -10  -4 -10 3.91139 137.183  27
 -10  -4 -10 405.013 240.865  18
  10  -4  10 143.775 490.628   9
 -10   4 -10-80.4131 504.788  19
 -10  -4 -11 1353.07 599.086  27
 -10   4 -11 1284.84 778.145  19
 -10  -4 -12 19293.9 2401.98  27
 -10   4 -12 15374.2 2886.38  21
 -10   4 -12 16880.7 2975.07  19
 -10  -4 -13 795.982 472.505  27
 -10   4 -13 630.824 692.309  21
 -10   4 -13 1083.68 792.082  19
 -10   4 -13 1281.81 448.053  15
 -10  -4 -14 11145.2 1803.46  27
 -10   4 -14 12914.3 2406.84  21
 -10   4 -14 9800.08 2176.47  13
 -10   4 -15 63.0939 523.491  13
 -10  -4 -15-124.078 119.672  16
 -10  -4 -15 37.2377 152.662  27
 -10   4 -16 2165.44 825.053  13
 -10  -4 -16 2758.97 710.981  27
 -10  -4 -16 3336.37 714.406  16
  10  -6 -17 1971.38 756.832  27
  10   6 -17 2337.92 1217.52  31
  10   6 -16 1249.69 720.752  13
  10  -6 -16 911.474 501.332  27
  10   6 -16 699.898 427.547  15
  10   6 -16 794.515 656.347  31
  10   6 -15-482.390 757.331  13
  10  -6 -15 152.047 207.663  27
  10  -6 -15-96.3934 247.905  11
  10   6 -15-386.845 625.403  15
  10   6 -15-126.253 412.512  31
  10   6 -14 4397.18 1299.80  13
  10   6 -14 2204.20 900.196  32
  10  -6 -14 4684.48 1263.16  11
  10  -6 -14 3341.26 1093.30  27
  10   6 -14 3406.59 1188.82  15
  10   6 -14 6028.32 2619.07  31
  10  -6 -13 7227.41 1613.41  27
  10  -6 -13 6774.49 1521.63  11
  10   6 -13 7704.70 1845.39  22
  10  -6 -13 5473.52 2515.08  17
  10   6 -13 7455.56 1774.62  15
  10   6 -13 10827.8 3212.01  31
  10  -6 -12 25573.5 3021.15  27
  10  -6 -12 29297.8 3481.89  11
  10   6 -12 29884.1 3642.85  15
  10  -6 -12 27884.5 5341.57  17
  10   6 -12 36111.4 6013.00  31
  10   6 -11 44664.3 6409.36  31
  10  -6 -11 35762.2 3890.81  11
  10  -6 -11 28581.1 3094.20  27
  10  -6 -11 31387.9 5837.05  17
  10   6 -11 32949.8 3729.55  15
  10  -6 -10 22268.0 2678.08  27
  10  -6 -10 28255.8 3475.59  11
  10  -6 -10 30386.1 5485.61  17
  10   6 -10 28704.6 3348.90  15
  10   6 -10 36041.7 5553.06  31
  10  -6  -9 37631.4 3975.81  11
  10  -6  -9 39695.8 6148.92  17
  10   6  -9 39415.9 3770.48  15
  10   6  -9 54177.7 6483.48  31
  10  -6  -8 900.822 477.127  27
  10  -6  -8 510.160 481.469  11
  10   6  -8 2517.37 2050.26  38
  10   6  -8 1352.75 644.638  15
  10   6  -8 2875.18 1509.76  31
  10   6  -7 5341.29 2527.90  28
  10  -6  -7 4324.31 2485.13  39
  10  -6  -7 3370.40 1556.00  33
  10   6  -7 5125.81 2453.59  38
  10   6  -6 6616.14 1570.98   2
  10  -6  -6 9347.76 3803.99  39
  10  -6  -6 9682.12 3822.56  33
 -10   6   5 579.342 404.532   2
  10   6  -5 114.302 155.211   2
  10  -6  -5-531.881 1069.78  39
  10  -6  -5-707.198 1954.36  33
 -10   6   4 7218.20 1775.63   2
  10   6  -4 5326.87 1279.31   2
  10  -6  -4 9704.57 3630.21  33
 -10   6   3 19219.5 2977.54   2
  10   6  -3 13125.3 1989.68   2
 -10   6   2 37498.5 4178.21   2
  10   6  -2 27121.0 2813.15   2
  10  -6  -2 40552.1 7902.71  34
 -10   6   1 35246.7 4074.61   2
  10   6  -1 28256.0 2853.11   2
  10  -6  -1 29615.9 6575.05  34
 -10   6   0 14367.9 2639.88   2
  10   6   0 11454.4 1795.45   2
  10   6   0 15147.3 2397.48  35
 -10  -6   0 12398.5 3476.11  34
  10  -6   0 9904.34 3608.26  34
 -10   6  -1 35386.4 4258.32   2
  10   6   1 32587.8 3434.69  35
 -10  -6  -1 25602.8 4929.77  34
  10  -6   1 21811.9 5759.78  34
  10   6   1 26765.6 2747.71   2
 -10   6  -2 258.803 424.598   2
  10   6   2 257.614 179.333   2
  10   6   2 393.409 71.8854  35
 -10   6  -3 4073.46 1564.48   2
 -10   6  -3 3317.72 1236.75  36
  10   6   3 2253.22 829.884   2
  10   6   3 3352.08 1140.13  35
 -10   6  -4 13453.9 2841.23   2
  10   6   4 8910.85 1676.25   2
  10   6   4 9860.39 2013.21  35
 -10   6  -4 11165.3 2413.63  36
 -10   6  -5 2258.11 1186.16   2
 -10   6  -5 1458.94 793.924  36
  10   6   5 1322.71 691.621  35
  10  -6   6 47356.9 4473.99   9
 -10   6  -6 38865.2 5200.35  36
 -10  -6  -7 43742.3 3326.63  27
  10  -6   7 38393.9 4151.93   9
 -10   6  -7 41367.8 4248.07  19
 -10  -6  -8 3354.39 925.881  27
 -10  -6  -8 1035.72 592.277  26
 -10  -6  -8 4377.96 1067.21  18
  10  -6   8 1993.31 995.114   9
 -10  -6  -9 424.604 273.031  27
 -10   6  -9 619.494 602.321  21
  10  -6   9 776.859 658.340   9
 -10  -6  -9 1058.34 420.240  18
 -10  -6 -10 200.752 173.185  27
 -10   6 -10 250.531 321.865  21
 -10  -6 -10 353.812 291.767  18
  10  -6  10 175.038 414.709   9
 -10  -6 -11 4532.82 1119.81  27
 -10   6 -11 4085.59 1488.52  21
 -10  -6 -11 4889.46 1094.41  18
  10  -6  11 2613.80 1021.51   9
 -10  -6 -12 8732.48 1580.56  27
 -10   6 -12 8796.12 2167.66  21
 -10  -6 -13 1209.39 517.264  27
 -10   6 -13 1391.97 865.042  21
 -10   6 -14 2447.85 1008.37  13
 -10  -6 -14 1898.10 679.385  27
 -10   6 -14 2551.18 1001.88  21
 -10   6 -15 245.060 255.067  13
 -10  -6 -15-10.8869 132.946  27
 -10  -6 -15-149.188 148.810  16
  10  -8 -15 364.813 294.976  27
  10   8 -15-420.790 386.625  31
  10  -8 -14 115.587 127.769  11
  10   8 -14-298.554 290.910  22
  10  -8 -14 282.644 289.171  27
  10   8 -14 402.091 379.823  32
  10   8 -14-26.5615 936.927  31
  10  -8 -13 8731.94 1738.13  27
  10  -8 -13 8921.98 1593.35  11
  10   8 -13 8760.44 1981.47  22
  10   8 -13 11274.3 3048.89  31
  10  -8 -12 11530.7 1984.84  27
  10  -8 -12 11531.4 2002.92  11
  10  -8 -12 10250.8 2901.54  17
  10   8 -12 15114.4 3614.67  31
  10  -8 -11 7488.44 1611.28  27
  10  -8 -11 9343.07 1874.67  11
  10  -8 -11 5286.21 2594.05  17
  10   8 -11 10680.4 3010.90  31
  10  -8 -10 16816.6 2366.87  27
  10  -8 -10 15798.4 4063.70  17
  10   8 -10 26010.6 4812.83  31
  10  -8 -10 19180.5 2800.48  11
  10  -8  -9 7012.49 1664.34  11
  10  -8  -9 6514.25 1431.01  27
  10  -8  -9 5958.79 2184.10  17
  10   8  -9 10689.1 3014.93  31
  10  -8  -8 4106.80 1105.37  27
  10  -8  -8 4802.33 1495.46  11
  10   8  -8 7916.14 2603.03  31
  10  -8  -7 1887.52 768.328  27
  10  -8  -7 1812.12 888.067  11
  10  -8  -7 1141.57 673.307  24
  10   8  -7 2472.26 1521.29  31
  10  -8  -6 317.184 288.027  27
  10  -8  -6 636.560 426.423  11
  10  -8  -6 871.952 533.424  24
  10   8  -6 987.632 633.875  31
  10  -8  -5 10250.0 2201.17  11
  10  -8  -5 10734.1 1882.50  24
  10  -8  -5 11853.6 4009.49   3
  10   8  -5 19605.5 3798.98  31
  10  -8  -4 13305.8 2490.43  11
  10  -8  -4 23254.7 4808.47   3
  10  -8  -4 24274.2 2799.44  24
  10   8  -3 8416.45 2243.82  31
  10  -8  -3 2844.74 1180.57  11
  10  -8  -3 6976.68 1485.94  24
  10  -8  -3 4129.78 1747.67   3
 -10  -8   2 47349.3 3633.64   6
 -10  -8   2 54364.8 4006.68  25
  10  -8  -2 43944.9 6922.24   3
  10  -8  -2 50486.0 4006.62  24
  10  -8  -1 107.383 390.294  11
 -10  -8   1 2003.92 797.897  25
 -10  -8   1 1694.06 627.644   6
  10  -8  -1 1977.08 796.072  24
 -10  -8   0 22812.9 2600.87   6
 -10  -8   0 20424.2 2473.91  25
  10  -8   0 13775.6 2117.28  24
  10  -8   0 9338.95 2092.25  11
 -10  -8  -1-33.5939 274.755   6
 -10  -8  -1 69.1481 137.302  25
  10  -8   1-882.853 523.706  24
  10  -8   1-117.233 379.602   9
 -10  -8  -2 356.161 273.634  25
  10  -8   2 0.85770 144.930  24
 -10  -8  -2 166.147 312.444   6
  10  -8   2-101.871 302.365   9
 -10  -8  -3 186.169 255.835   6
 -10  -8  -3-71.3889 301.835  26
 -10  -8  -3-86.4466 297.978  25
  10  -8   3-44.9794 286.219  24
  10  -8   3-71.1098 349.001   9
 -10  -8  -4 2744.95 869.573  26
 -10   8  -4 2162.35 918.088  21
  10  -8   4 3111.77 1154.08   9
 -10  -8  -5 4323.97 1154.88  26
 -10   8  -5 4904.01 1532.98  21
  10  -8   5 3895.93 1314.65   9
 -10  -8  -6 18840.7 2600.02  26
 -10   8  -6 21152.4 3364.99  21
  10  -8   6 19207.8 3084.00   9
 -10  -8  -7 3386.00 1151.04  26
 -10   8  -7 5008.19 1672.23  21
  10  -8   7 5036.69 1588.09   9
 -10  -8  -8 9184.17 1614.47  27
 -10   8  -8 6971.19 1962.40  21
 -10  -8  -8 9877.84 1648.05  18
  10  -8   8 5874.16 1750.76   9
 -10  -8  -9 791.157 560.743  27
  10  -8   9 341.921 141.734   9
 -10   8  -9 486.414 137.743  21
 -10  -8  -9 712.537 401.356  18
 -10  -8 -10 918.374 545.598  27
 -10  -8 -10 1024.79 407.287  18
 -10   8 -10 804.801 751.998  21
  10  -8  10 644.854 630.270   9
 -10  -8 -11 1647.53 612.126  27
 -10  -8 -11 2949.54 777.619  18
 -10   8 -11 2979.50 1208.30  21
  10  -8  11 1167.21 770.428   9
 -10   8 -12 123.424 238.736  13
 -10  -8 -12 175.593 203.902  27
  10  -8  12-164.760 427.508   9
 -10   8 -13 179.740 200.120  13
 -10  -8 -13-26.5942 127.704  27
  10 -10 -12 6817.78 1308.50  27
  10 -10 -12 6166.02 1130.73  11
  10  10 -12 8133.43 1703.22  22
  10 -10 -12 5083.25 1558.41  17
  10  10 -12 9209.03 2116.18  31
  10 -10 -11 6118.74 1274.76  27
  10 -10 -11 5554.34 1158.83  11
  10  10 -11 6686.70 1529.05  22
  10 -10 -11 2515.25 1133.56  17
  10  10 -11 7833.89 2056.60  31
 -10 -10  10 6408.09 1454.17   6
  10 -10 -10 5713.91 1230.92  27
  10 -10 -10 4573.06 1141.55  11
  10  10 -10 5139.43 1359.73  22
  10 -10 -10 2740.41 1426.74  17
  10  10 -10 7308.83 2126.28  31
  10 -10  -9 5101.22 1199.66  27
  10 -10  -9 5121.53 1338.60  11
 -10 -10   9 5351.36 1352.05   6
  10 -10  -9 1623.47 663.091  17
  10  10  -9 6174.52 2061.76  31
  10 -10  -8 4617.30 1253.08  11
 -10 -10   8 4297.64 1174.62   6
  10  10  -8 8302.98 2475.17  31
  10 -10  -7-138.856 305.815  11
  10 -10  -7 432.992 348.599  25
 -10 -10   7 454.061 332.354   6
  10  10  -7 292.798 301.052  31
  10 -10  -6 912.278 618.530  25
 -10 -10   6 591.970 358.531   6
  10 -10  -6 608.443 450.921  11
  10  10  -6 974.885 780.062  31
  10 -10  -5 617.849 426.216  24
 -10 -10   5 575.883 366.692   6
  10  10  -5 1607.92 1114.88  31
  10 -10  -5-190.950 511.707  11
  10 -10  -4 1995.35 1087.54  11
  10 -10  -4 2413.07 2003.84   3
 -10 -10   4 3233.65 1083.12   6
  10 -10  -4 2818.41 1031.16  24
  10  10  -4 3721.69 1782.79  31
 -10 -10   3 20942.9 2659.45   6
  10 -10  -3 6287.98 1827.72  11
  10 -10  -3 20688.3 2856.36  24
  10 -10  -3 10001.8 3047.35   3
  10  10  -3 24716.4 3984.24  31
 -10 -10   2 38699.8 3715.67   6
  10 -10  -2 14986.7 2846.04  11
 -10 -10   2 42981.3 4028.27  25
  10 -10  -2 38158.8 3979.13  24
  10 -10  -2 17364.9 4199.96   3
  10  10  -2 36775.4 4851.07  31
 -10 -10   1 19122.6 2587.19   6
 -10 -10   1 22254.8 2882.23  25
  10 -10  -1 20909.4 2921.01  24
  10  10  -1 20848.0 3591.67  31
  10 -10   0 2191.40 1858.40   3
 -10 -10   0 2338.44 1079.26   3
  10 -10   0 8950.68 1936.02  24
 -10 -10   0 8620.16 1789.19   6
 -10  10  -1 2612.58 1082.74  31
 -10 -10  -1 4362.24 1260.27   6
 -10 -10  -1 4121.56 1061.24  26
  10 -10   1 4398.71 1323.98  24
 -10 -10  -1 2979.26 1870.56   3
  10 -10   1 4738.26 1420.17   9
 -10  10  -2-205.578 400.422  31
 -10 -10  -2 579.393 480.570   6
 -10 -10  -2-152.116 336.510  26
  10 -10   2-77.5040 264.671  24
 -10 -10  -2-628.060 1091.10   3
  10 -10   2 8.57414 283.106   9
 -10 -10  -3-80.8808 429.032   6
 -10 -10  -3 1202.19 1108.83   3
  10 -10   3 676.114 457.265  24
 -10  10  -3 1366.42 744.894  31
  10 -10   3 872.718 668.991   9
 -10 -10  -3 511.474 293.156  26
 -10 -10  -4 13.6468 82.6710  26
 -10  10  -4-122.423 404.143  31
  10 -10   4 485.763 418.793   9
 -10 -10  -5 7707.56 1593.64  26
  10 -10   5 8983.74 2078.82   9
 -10  10  -5 6151.31 1444.02  31
 -10 -10  -6 524.598 472.498  26
  10 -10   6 1215.36 850.213   9
 -10 -10  -7 7575.62 1264.84  18
  10 -10   7 6555.66 1755.83   9
 -10 -10  -8 2556.15 652.840  18
  10 -10   8 1799.30 914.353   9
 -10 -10  -9 2634.11 619.551  18
  10 -10   9 1147.71 639.502   9
  10 -10  10-218.867 238.569   9
 -10 -10 -10 206.925 127.867  18
  10  12  -8 617.080 510.822  22
 -10 -12   8-226.430 394.807   6
 -10 -12   7-146.802 246.495   6
  10  12  -7 119.359 158.573  22
  10 -12  -7 400.369 355.117  17
  10  12  -7 685.812 487.849  31
 -10 -12   6 59.9383 62.4148   6
  10 -12  -6 13.2227 225.425  25
  10  12  -6 527.417 387.244  22
  10 -12  -6 761.728 319.185  17
  10  12  -6 168.435 110.041  31
 -10 -12   5 1065.89 590.764   6
  10 -12  -5 618.502 477.507  25
 -10 -12   5 526.643 529.333   3
  10  12  -5 682.079 358.706  31
 -10 -12   4 1091.33 583.953   6
  10 -12  -4 1249.91 686.432  25
 -10 -12   4 595.548 259.165   3
  10  12  -4 1037.31 725.825  31
 -10  12   3 712.917 535.444  31
 -10 -12   3 3571.74 1082.81   6
 -10 -12   3 3806.12 968.009  26
  10 -12  -3 2709.78 966.203  25
 -10 -12   3 1407.91 1204.84   3
  10  12  -3 1303.69 650.804  31
 -10  12   2 991.398 637.584  31
 -10 -12   2 3273.48 1019.70   6
  10 -12  -2 3039.82 1065.12  25
 -10 -12   2 3525.66 969.786  26
  10  12  -2 1835.98 864.212  31
 -10 -12   2 451.276 312.560   3
  10  12  -1 499.908 406.070  31
 -10  12   1-115.486 353.175  31
 -10 -12   1 1066.01 475.142   6
 -10 -12   1 1636.65 588.153  26
  10 -12  -1 252.595 191.295   3
 -10 -12   1-87.2809 744.216   3
  10 -12  -1 1682.23 766.722  25
 -10  12   0 575.043 510.228  31
  10  12   0 235.348 284.165  31
 -10 -12   0 684.622 332.915   6
 -10 -12   0 1710.41 632.748  26
  10 -12   0 1621.37 1115.16   3
 -10 -12   0 9.64452 695.355   3
  10 -12   0 1855.83 793.729  25
  10  12   1-100.680 420.446  31
 -10 -12  -1-524.768 467.684   6
 -10 -12  -1 9.64689 31.0179  26
  10 -12   1 269.911 317.784  25
  10 -12   1-483.355 503.734   3
 -10  12  -1-64.7147 19.8494  31
 -10  12  -2 272.697 358.922  31
 -10 -12  -2 38.8432 96.0676  26
  10 -12   2 248.309 31.0142  25
  10 -12   2 285.960 248.674   9
  10 -12   3 1519.80 749.318  25
 -10  12  -3 1178.73 579.866  31
  10 -12   3 936.725 588.463   9
 -10 -12  -3 1360.05 527.534  26
 -10 -12  -4 683.693 486.351  26
  10 -12   4 372.246 328.237  25
  10 -12   4 362.312 385.021   9
 -10 -12  -5 477.199 357.730  26
  10 -12   5 1210.88 639.931   9
 -10 -12  -5 1287.62 351.373  18
  10 -12   6 348.001 323.326   9
 -10 -12  -6 261.703 197.765  18
  11   1 -19 19178.1 3660.38  13
  11   1 -18 783.231 934.739  13
  11   1 -18 121.098 246.639  15
  11  -1 -18-659.214 920.312  13
  11   1 -17 1703.66 1128.88  13
  11  -1 -17 481.480 360.924  14
  11   1 -17 1850.06 1011.80  31
  11  -1 -17 1752.02 1200.64  13
  11  -1 -16 213.831 310.807  13
  11   1 -16 4.79361 395.155  13
  11  -1 -16-91.3944 824.633  12
  11   1 -16 449.955 371.695  14
  11  -1 -16 390.897 709.921  14
  11   1 -16-72.6852 641.548  31
  11  -1 -15 1910.65 1148.96  13
  11   1 -15 2826.47 1176.94  13
  11   1 -15 2758.36 959.975  16
  11   1 -15 2698.03 1067.98  14
  11  -1 -15 3048.88 1029.45  14
  11  -1 -15 1481.63 1622.51  31
  11   1 -15 2324.39 1294.54  31
  11  -1 -14 2229.14 1149.78  13
  11   1 -14 2426.72 985.707  13
  11   1 -14 3150.69 1307.42  32
  11   1 -14 2294.45 844.867  16
  11   1 -14 2331.33 863.886  14
  11  -1 -14 2707.61 858.021  14
  11  -1 -14 3353.30 1625.71  31
  11   1 -14 2764.01 1357.78  31
  11  -1 -13 29204.8 3017.22  10
  11   1 -13 30554.8 2854.61  16
  11   1 -13 28855.8 3150.93  14
  11  -1 -13 27395.0 2807.07  14
  11  -1 -13 39460.9 5891.91  31
  11   1 -13 37754.5 5794.84  31
  11  -1 -13 31225.3 4009.57  13
  11   1 -13 28244.5 3537.12  13
  11   1 -13 16882.7 2988.53  32
  11   1 -12 15755.1 3543.12  31
  11  -1 -12 11377.5 1840.74  10
  11   1 -12 10697.9 1741.75  14
  11  -1 -12 8963.14 1470.10  14
  11   1 -12 4662.90 1590.65  32
  11  -1 -12 11533.5 2254.86  13
  11   1 -12 9720.68 1921.85  13
  11  -1 -12 12556.8 3152.25  31
  11  -1 -11 336.635 190.495  38
  11   1 -11-168.651 770.416  40
  11  -1 -11 668.414 591.813  40
  11   1 -11-1285.71 1205.61  38
  11  -1 -10 2537.25 1434.11  33
  11   1 -10 4085.81 1536.32  40
  11  -1 -10 5053.67 1753.02  40
  11   1 -10 4036.01 1811.37  38
  11  -1 -10 4737.87 2132.52  38
  11   1 -10 5715.91 2242.83  37
  11   1  -9 146.612 276.985  40
  11  -1  -9-13.3700 314.613  38
  11  -1  -9 174.102 325.474  40
  11   1  -9 450.640 204.190  38
  11   1  -9 352.325 432.919  37
  11  -1  -9-374.091 934.928  33
  11  -1  -8 23241.6 3982.28  38
  11   1  -8 24902.7 4043.48  38
  11   1  -8 21630.4 3149.41  40
  11  -1  -8 21039.2 3116.00  40
  11   1  -8 25085.8 3921.74  37
  11  -1  -8 17934.3 3311.86  33
 -11   1   7 5698.98 1475.57  41
  11   1  -7 8256.80 1845.80  40
  11   1  -7 10226.8 2267.35  37
  11  -1  -7 7691.55 1821.38  40
  11   1  -7 12438.6 2618.87  38
  11  -1  -7 9058.40 2323.58  38
  11  -1  -7 9321.47 2176.99  33
 -11   1   6 26239.3 4174.51  30
 -11  -1   6 35056.0 3067.60  41
 -11   1   6 37955.8 3786.27  41
  11  -1  -6 43690.1 4505.73  38
  11  -1  -6 36930.6 3634.24  40
  11   1  -6 37634.7 3747.71  40
  11   1  -6 41423.8 4218.04  38
  11   1  -6 39481.7 3937.98  37
  11  -1  -6 34045.6 3779.30  33
 -11   1   5 317056. 12800.7  30
 -11   1   5 434010. 12293.4  41
  11  -1  -5 396435. 11265.1  40
  11  -1  -5 489209. 13944.7  38
  11   1  -5 407385. 11167.6  37
 -11  -1   5 333807. 9817.13  41
  11   1  -5 511277. 13825.0  38
  11  -1  -5 361646. 10822.5  33
 -11   1   4 16400.4 2609.76  30
  11   1  -4 23915.9 2601.92  28
 -11  -1   4 11816.1 1871.28  41
  11   1  -4 26001.4 2735.77  38
  11  -1  -4 25761.3 2731.16  38
  11   1  -4 19788.6 2127.18  37
 -11   1   4 20407.0 2514.43  41
  11  -1  -4 15747.3 1921.16  33
 -11   1   3 154124. 7473.79  30
  11   1  -3 213765. 6615.04  28
  11  -1  -3 242678. 7182.13  38
 -11  -1   3 122352. 5996.03  41
  11  -1  -3 189718. 3160.25   1
  11   1  -3 249185. 7661.48  38
  11   1  -3 186495. 5643.54  37
  11  -1  -3 152951. 5256.00  33
 -11   1   3 187006. 7250.81  41
  11   1  -2 22618.5 1693.05  28
 -11   1   2 21840.8 2385.24  41
 -11  -1   2 14258.9 2084.07  41
  11  -1  -2 18244.5 1364.94   1
 -11   1   2 19533.0 1487.52  36
  11   1  -2 21170.4 1404.96  35
  11  -1  -2 15891.2 1327.94  33
 -11  -1   1 8641.25 1343.21  36
  11  -1  -1 9212.71 1240.21   1
 -11  -1   1 16319.4 2162.11  41
 -11   1   1 18433.8 1673.55  36
  11   1  -1 17347.2 1497.73  35
  11  -1  -1 8030.51 647.842  33
 -11   1   1 18339.3 2119.74  41
  11  -1   0 1328.89 585.982   1
 -11   1   0 2557.61 749.074  41
 -11  -1   0 2125.25 802.833  41
 -11   1   0 2682.71 693.619  36
 -11  -1   0 1668.35 721.641  36
  11   1   0 2884.72 666.518  35
  11  -1   1 30861.9 1858.96  30
  11  -1   1 47883.0 3476.10   1
 -11   1  -1 70959.0 4029.12  36
 -11   1  -1 70265.2 4125.86  41
 -11  -1  -1 84315.8 5006.10  36
 -11  -1  -1 43344.6 3360.50  41
 -11   1  -2 17697.3 2048.45  41
  11  -1   2 13588.3 1934.73   1
 -11   1  -2 17196.5 2156.27  36
 -11  -1  -2 24544.5 2875.18  36
 -11  -1  -2 8988.74 1500.55  41
 -11   1  -3 444143. 10241.0  41
  11  -1   3 264687. 9267.63   1
 -11  -1  -3 540923. 14612.1  36
 -11   1  -3 428640. 11559.1  36
  11  -1   4 923.800 513.255   1
 -11   1  -4 2372.11 777.599  41
 -11   1  -4 1941.97 856.693  36
 -11  -1  -4 2538.43 1019.05  36
 -11  -1  -4 999.430 423.456  41
 -11   1  -5 316090. 11727.1  36
 -11  -1  -5 340594. 13125.6  36
  11  -1   6 329.373 357.598   1
 -11   1  -6 1028.67 792.218  36
 -11  -1  -6 783.369 582.238  36
  11   1   7 64152.9 6017.45   1
 -11   1  -7 75227.8 6670.45  36
 -11  -1  -7 81187.4 7392.65  36
  11   1   8 9211.12 2385.60   1
  11  -1   8 2995.36 1325.80   1
 -11  -1  -8 12194.4 3098.61  36
 -11   1  -8 9636.94 2633.55  36
  11   1   9 1757.14 1070.03   1
  11  -1   9 638.595 576.863   1
 -11   1  -9 549.129 652.950  36
 -11  -1  -9 777.664 996.814  36
 -11  -1 -10 7582.71 1479.57  27
 -11   1 -10 5475.10 1126.36  20
 -11  -1 -10 6977.52 1423.04  20
 -11   1 -10 8207.08 2049.90  19
 -11  -1 -11 2798.33 916.685  27
 -11   1 -11 3896.40 1009.55  16
 -11   1 -11 2777.20 1123.45  19
 -11  -1 -12 351.285 201.439  27
 -11  -1 -12 1415.87 903.134  19
 -11   1 -12 1612.00 987.329  19
 -11   1 -12 1925.23 743.035  16
 -11  -1 -13 11548.2 1985.66  27
 -11   1 -13 14720.1 2752.33  19
 -11   1 -13 21242.6 2352.19  16
 -11  -1 -13 21767.7 2491.44  16
 -11  -1 -13 13620.1 2573.49  19
 -11   1 -14-189.535 549.208  13
 -11   1 -14 215.806 212.582  16
 -11  -1 -14 750.962 578.734  19
 -11  -1 -14 417.465 329.179  16
 -11   1 -14 443.857 437.621  19
 -11   1 -15 12744.2 1556.72  16
 -11  -1 -15 14158.1 1745.79  16
 -11   1 -15 13324.0 2110.82  14
 -11   1 -15 7939.70 1823.39  19
 -11   1 -15 8316.41 1907.96  13
 -11  -1 -16 307.035 186.769  16
 -11   1 -16 885.840 291.269  14
 -11  -1 -16 526.062 398.467  14
  11   3 -18 356.424 396.743  13
  11   3 -18 468.613 293.226  15
  11   3 -18 1317.28 1440.71  31
  11   3 -17 4859.60 1548.35  13
  11   3 -17 4136.19 1230.08  15
  11   3 -17 5040.33 2248.96  31
  11   3 -16 11678.9 2584.41  13
  11   3 -16 12323.5 2192.49  15
  11   3 -16 18967.1 4431.70  31
  11   3 -15 5386.14 1654.18  13
  11  -3 -15 7200.48 1952.21  12
  11  -3 -15 4448.58 1254.58  27
  11   3 -15 5244.93 1417.99  15
  11   3 -15 6124.96 1835.07  32
  11   3 -15 7517.48 2676.18  31
  11  -3 -15 5856.75 1815.50  13
  11  -3 -14 18037.5 2525.89  27
  11  -3 -14 10391.2 2414.51  12
  11   3 -14 31836.2 5639.67  31
  11   3 -14 21407.6 2850.18  15
  11   3 -14 14019.9 2809.04  32
  11  -3 -14 29335.7 4591.09  13
  11   3 -14 20339.2 3019.42  13
  11  -3 -13 44425.1 3853.36  27
  11  -3 -13 18877.3 3362.80  12
  11  -3 -13 47558.8 4206.18  10
  11   3 -13 59870.3 7418.49  31
  11   3 -13 53938.4 4840.76  14
  11   3 -13 28734.8 4196.97  32
  11  -3 -13 65912.6 6608.01  13
  11   3 -13 46029.3 4406.84  13
  11   3 -12 1535.17 715.025  13
  11  -3 -12 739.420 453.446  12
  11  -3 -12 1511.88 700.080  27
  11  -3 -12 1521.53 635.946  10
  11   3 -12 1913.24 679.064  14
  11   3 -12 2100.52 1329.78  31
  11  -3 -12 2519.85 1181.52  13
  11  -3 -11 19995.6 2357.49  27
  11  -3 -11 22030.9 3420.54  12
  11  -3 -11 25982.8 2883.97  10
  11  -3 -11 28418.7 4703.08  17
  11   3 -11 32372.4 4725.05  31
  11  -3 -11 20773.0 3896.24  40
  11   3 -11 22346.5 5452.93  38
  11   3 -11 25203.7 5612.65  37
  11   3 -11 27736.5 3064.31  14
  11   3 -11 17636.6 2308.90  13
  11  -3 -10 6969.04 2160.25  40
  11   3 -10 7783.84 2922.09  38
  11   3 -10 11597.6 3560.50  37
  11  -3 -10 6482.17 2721.41  33
  11   3 -10 7072.36 1962.50  40
  11   3  -9 4081.40 2132.08  28
  11   3  -9 4655.46 2152.99  37
  11  -3  -9 3243.48 1302.69  40
  11   3  -9 3978.78 1925.87  38
  11   3  -9 2784.79 1163.86  40
  11  -3  -9 1894.59 1179.60  33
  11   3  -8 115.080 167.049  40
  11   3  -8 285.415 509.731  28
  11   3  -8 259.388 350.385  38
  11   3  -8 365.977 426.873  37
  11  -3  -8 177.158 359.749  40
  11  -3  -8 937.405 813.459  33
  11   3  -7 24378.1 4391.20  28
  11  -3  -7 16150.8 3529.17  33
 -11   3   7 15390.8 2659.69  41
  11   3  -7 15680.1 2583.14  40
  11  -3  -7 15972.6 2607.96  40
  11   3  -7 23407.6 4104.72  38
  11   3  -6 75872.6 7208.55  28
  11   3  -6 53698.5 4679.10  40
  11   3  -6 84401.4 7379.04  38
 -11  -3   6 55236.1 3599.84  41
  11  -3  -6 51414.3 4355.46  40
  11   3  -6 50066.7 3717.28   2
 -11   3   6 57779.9 4739.38  41
  11  -3  -6 51846.9 6000.45  33
 -11  -3   5 103965. 4909.44  41
 -11   3   5 91983.9 5037.92   2
 -11   3   5 102687. 5794.94  41
  11  -3  -5 86774.3 5284.83  40
  11  -3  -5 101623. 8177.66  39
  11  -3  -5 95618.9 7703.67  33
  11   3  -5 86842.5 4606.37   2
 -11  -3   4 55851.4 3650.84  41
  11   3  -4 47633.5 3291.83   2
 -11   3   4 56752.7 4132.69   2
  11  -3  -4 49538.4 3715.60  40
  11  -3  -4 57949.8 5860.97  39
  11  -3  -4 50105.1 5206.98  33
  11   3  -3 117442. 7454.82  29
  11  -3  -3 97024.8 7372.73  39
  11  -3  -3 84149.7 4531.88  40
  11   3  -3 89471.6 4426.41   2
  11  -3  -3 95419.6 6807.97  33
 -11  -3   3 111736. 5145.93  41
  11   3  -2 1077.28 482.540   2
  11   3  -2 1226.89 419.771  35
 -11  -3   2 1223.18 548.139  41
  11  -3  -2 967.829 467.935  40
  11  -3  -1 18438.5 3315.46  30
 -11  -3   1 23265.9 2401.21  41
  11   3  -1 20824.4 2099.12   2
  11   3  -1 22221.5 2087.03  35
  11  -3  -1 19268.0 3127.29  34
  11  -3   0 3864.84 1561.22  30
  11   3   0 4968.94 1008.37   2
 -11  -3   0 6382.59 1220.66  41
  11   3   0 5732.00 1126.81  35
 -11  -3   0 3157.12 1246.96  34
  11  -3   0 5606.52 1901.95  34
 -11  -3  -1 123840. 5437.05  41
  11  -3   1 110860. 4846.56   1
 -11   3  -1 110157. 4954.61  36
  11   3   1 118827. 4975.48   2
  11   3   2 42342.5 3051.03   2
 -11   3  -2 34763.5 2690.62  41
  11  -3   2 37703.5 3076.97   1
 -11  -3  -2 29488.0 2925.17  39
 -11   3  -2 36688.7 3119.97  36
  11   3   2 35717.3 3086.13  35
 -11  -3  -2 46953.1 3357.80  41
  11  -3   3 173846. 7061.65   1
 -11  -3  -3 240202. 7654.85  41
 -11   3  -3 190166. 7942.60  36
 -11   3  -3 174340. 6193.83  41
  11   3   3 220014. 8124.75  35
 -11   3  -4 64.7573 320.920   2
 -11   3  -4 251.414 64.2538  36
  11   3   4 865.975 533.945  35
 -11   3  -4 485.643 375.071  41
  11  -3   4 327.475 251.420   1
 -11  -3  -4 410.070 439.434  41
 -11   3  -5 113359. 7230.58   2
 -11   3  -5 100700. 6684.80  36
 -11   3  -6 1538.52 825.718  36
  11  -3   6 378.968 222.694   1
 -11   3  -7 15859.4 2926.53  36
  11   3   7 20077.8 2926.37  35
 -11   3  -8 15066.1 3158.28  36
  11   3   8 11476.1 2357.19  35
 -11  -3  -9 3462.32 905.614  27
 -11   3  -9 2468.45 939.986  19
 -11  -3  -9 3911.76 906.704  18
 -11   3  -9 3596.37 1333.25   7
 -11  -3 -10 7424.44 1407.80  27
 -11   3 -10 7408.55 1757.05   7
 -11   3 -10 7030.73 1853.84  19
 -11  -3 -11 19853.0 2406.78  27
 -11   3 -11 14470.3 2727.30  19
 -11  -3 -12 2052.88 781.904  27
 -11   3 -12 2127.37 1065.86  19
 -11   3 -13 6517.37 1737.41  21
 -11   3 -13 8382.57 2050.07  19
 -11  -3 -13 7604.41 1570.80  27
 -11  -3 -14 1554.68 611.104  27
 -11   3 -14 3849.76 1421.84  13
 -11   3 -14 4544.00 1441.14  19
 -11  -3 -14 6526.12 1307.63  16
 -11   3 -15 2038.98 941.969  13
 -11  -3 -15 2344.81 764.906  27
 -11  -3 -15 4130.97 969.992  16
 -11   3 -16 938.797 573.612  13
 -11  -3 -16 1290.62 491.827  27
 -11  -3 -16 1416.92 501.559  16
  11   5 -17 7668.30 1831.23  13
  11  -5 -17 7028.03 1557.04  27
  11   5 -17 7868.05 1627.92  15
  11   5 -17 10522.0 2925.03  31
  11   5 -16 1591.02 761.181  13
  11  -5 -16 1069.61 569.709  27
  11   5 -16 1646.76 725.517  15
  11   5 -16 1282.67 1084.29  31
  11   5 -15 94.9408 159.269  13
  11  -5 -15 689.392 583.529  27
  11  -5 -15 110.731 299.882  11
  11   5 -15 718.986 614.134  15
  11   5 -15 490.755 515.444  32
  11   5 -15 1099.53 1042.63  31
  11   5 -14 7490.08 1780.04  13
  11  -5 -14 6087.40 1486.30  27
  11  -5 -14 7581.47 1709.21  11
  11   5 -14 7716.45 1763.49  15
  11   5 -14 6414.45 2004.28  32
  11   5 -14 9534.79 3032.38  31
  11   5 -13 8809.02 1835.69  13
  11  -5 -13 9812.29 1899.65  27
  11   5 -13 9332.17 1888.91  15
  11  -5 -13 12027.8 2236.81  11
  11  -5 -13 8297.16 1993.31  12
  11   5 -13 15432.2 3859.78  31
  11   5 -12 6064.28 1529.44  13
  11  -5 -12 6241.76 1457.07  27
  11  -5 -12 3265.42 1098.87  12
  11  -5 -12 8111.10 2874.24  17
  11   5 -12 7025.26 1679.85  15
  11   5 -12 8252.89 2616.36  31
  11  -5 -11 28958.3 3085.23  27
  11  -5 -11 34196.7 3706.92  10
  11  -5 -11 35724.8 5949.85  17
  11   5 -11 32484.4 3358.12  15
  11  -5 -10 10901.8 1803.14  27
  11  -5 -10 14643.1 2304.25  10
  11  -5 -10 13823.2 3188.10  17
  11   5 -10 12365.4 2012.20  15
  11   5 -10 17907.1 3628.78  31
  11   5  -9 5766.28 2956.26  28
  11  -5  -9 5044.76 1158.30  27
  11   5  -9 7479.27 3111.00  38
  11  -5  -9 3698.66 2354.25  33
  11   5  -8 24009.6 5822.77  28
  11   5  -8 25460.9 5510.67  38
  11  -5  -8 15342.6 4540.29  33
  11   5  -7 26591.4 5682.62  28
 -11   5   7 22668.9 3377.57  41
  11  -5  -7 18767.3 4897.38  39
  11   5  -7 27062.2 5417.14  38
  11  -5  -7 17255.5 4618.56  33
  11   5  -6 474.457 368.983   2
  11  -5  -6-292.991 1477.85  39
  11  -5  -6 47.7500 689.577  33
 -11   5   5 31171.5 3475.80   2
  11  -5  -5 37434.1 6525.90  39
  11   5  -5 25621.1 2807.86   2
  11  -5  -5 34478.4 5969.40  33
 -11   5   4 156.839 140.743   2
  11  -5  -4 814.220 1049.72  39
  11   5  -4-35.6850 174.628   2
  11  -5  -4-363.499 788.969  33
 -11   5   3 14144.5 2365.08   2
  11   5  -3 12448.8 1814.52   2
 -11   5   2 874.665 583.627   2
  11  -5  -2 1353.50 385.929  34
  11   5  -2 421.536 327.550   2
 -11   5   1 16333.7 2652.20   2
  11   5  -1 14440.1 1923.93   2
  11   5  -1 16222.6 2250.94  35
  11  -5  -1 12290.5 3681.68  34
 -11   5   0 9399.44 2035.45   2
  11   5   0 7353.19 1343.34   2
  11   5   0 8076.62 1548.82  35
 -11  -5   0 5893.93 2215.35  34
  11  -5   0 6491.22 2682.68  34
 -11   5  -1 1101.96 689.616   2
  11   5   1 748.761 376.498   2
 -11  -5  -1 299.074 242.012  34
  11   5   1 1235.10 612.711  35
  11   5   2 142.124 170.592   2
 -11   5  -2 200.642 180.711  36
  11   5   2 465.828 149.168  35
 -11   5  -2 62.8464 248.149   2
 -11   5  -3 5351.23 1680.32   2
  11   5   3 5513.91 1249.19   2
 -11   5  -3 5512.21 1451.73  36
  11   5   3 5073.94 1360.74  35
 -11   5  -4 3841.19 1363.51   2
  11   5   4 2658.00 879.638   2
 -11   5  -4 3894.93 1308.55  36
  11   5   4 2663.79 983.762  35
 -11   5  -5 34683.6 4533.01   2
 -11   5  -5 32204.5 4139.13  36
  11   5   5 31153.7 3653.39  35
 -11   5  -6 2078.67 1115.85  36
  11   5   6 2185.02 1081.09  35
 -11  -5  -7 16374.6 1976.86  27
 -11   5  -7 16529.0 2536.01   7
 -11   5  -7 14518.2 2379.58  19
 -11   5  -7 11087.5 2650.27  36
  11   5   7 13795.1 2586.38  35
 -11  -5  -8 2258.20 767.080  27
 -11   5  -8 2041.18 928.556  19
 -11  -5  -8 2715.86 788.701  18
 -11   5  -8 2720.87 959.183   7
 -11  -5  -9 6061.52 1210.15  18
 -11  -5  -9 5686.38 1199.81  27
 -11   5  -9 5020.56 1542.05  19
  11  -5   9 3309.29 1271.37   9
 -11  -5 -10 1090.44 497.921  27
 -11  -5 -10 1983.75 691.392  18
  11  -5  10 825.276 621.150   9
 -11   5 -10 1320.68 312.900  19
 -11  -5 -11 14889.2 2059.43  27
 -11   5 -11 11716.0 2579.51  21
 -11   5 -11 13842.5 2690.01  19
  11  -5  11 5728.43 1670.29   9
 -11  -5 -12 5182.94 1208.72  27
 -11   5 -12 3131.77 1226.32  21
 -11  -5 -13 7577.26 1492.02  27
 -11   5 -13 8600.32 2070.42  21
 -11  -5 -14 2373.21 766.177  27
 -11   5 -14 2263.90 929.628  13
 -11   5 -14 2777.86 1052.15  21
 -11   5 -15 1004.84 687.616  13
 -11  -5 -15 1222.32 542.306  27
 -11  -5 -15 1754.06 563.502  16
  11  -7 -16-25.2472 65.5103  27
  11   7 -16 474.443 351.323  31
  11  -7 -15 7875.56 1620.75  27
  11  -7 -15 7090.63 1260.82  11
  11   7 -15 8454.71 1800.30  32
  11   7 -15 11953.4 3060.57  31
  11  -7 -14 14698.1 2254.22  27
  11  -7 -14 14225.1 2014.73  11
  11   7 -14 12452.2 2520.20  32
  11   7 -14 19059.0 3998.01  31
  11  -7 -13 23943.5 2958.99  27
  11  -7 -13 22081.9 2804.93  11
  11   7 -13 23763.4 3258.69  22
  11   7 -13 22895.0 3092.76  15
  11   7 -13 30382.9 5240.11  31
  11  -7 -12 22017.3 2818.53  27
  11  -7 -12 22172.9 2991.39  11
  11  -7 -12 19113.0 4319.80  17
  11   7 -12 21581.1 3050.47  15
  11   7 -12 29763.9 5139.46  31
  11  -7 -11 21225.1 2756.94  27
  11  -7 -11 25444.7 3299.14  11
  11  -7 -11 24153.2 4646.56  17
  11   7 -11 25283.2 3224.25  15
  11   7 -11 35621.8 5635.72  31
  11  -7 -10 6119.19 1441.96  27
  11  -7 -10 5850.40 1521.40  11
  11  -7 -10 6738.36 2375.05  17
  11   7 -10 6680.03 1664.74  15
  11   7 -10 9095.48 2842.52  31
  11  -7  -9 7455.52 1551.03  27
  11  -7  -9 7679.78 1845.81  11
  11  -7  -9 10859.4 3252.69  17
  11   7  -9 8910.59 1824.04  15
  11   7  -9 11550.4 2932.03  31
  11  -7  -8 4260.65 1100.01  27
  11  -7  -8 5082.93 1626.46  11
  11   7  -8 5514.64 1354.59  15
  11   7  -8 7841.69 2475.08  31
  11  -7  -7 9997.43 1710.66  27
  11  -7  -7 9448.55 2159.48  11
  11  -7  -6 6169.77 1243.07  27
  11  -7  -6 5008.32 1557.43  11
  11  -7  -6 6137.52 1317.34  24
  11  -7  -6 3943.19 2583.90  39
  11   7  -6 9246.91 2400.49  31
  11   7  -5 15379.6 2491.32   2
  11  -7  -5 17924.0 5487.24  39
  11  -7  -5 20255.3 5640.08  33
 -11   7   4 11688.1 2595.80   2
  11  -7  -4 9192.54 3489.58  39
  11   7  -4 9898.45 1962.68   2
  11  -7  -4 9795.21 3406.55  33
 -11   7   3 26102.2 3843.89   2
  11   7  -3 17746.3 2510.82   2
 -11   7   2 5881.41 1886.85   2
  11   7  -2 3730.03 1091.89   2
  11  -7  -2 3817.49 1796.13  34
 -11  -7   2 4019.34 2539.24  34
 -11   7   1 2707.04 1116.65   2
  11   7  -1 1968.47 797.564   2
  11  -7  -1 1429.81 1092.17  34
 -11  -7   1-430.186 1082.83  34
 -11   7   0 1760.25 1018.47   2
  11   7   0 823.819 513.378   2
  11  -7   0 328.880 1398.39  34
 -11   7  -1 12184.9 2791.61   2
  11   7   1 7076.19 1559.29   2
  11   7   1 8651.09 2006.94  35
  11  -7   1 8105.73 3593.89  34
 -11   7  -2 629.924 733.157   2
  11   7   2 260.477 406.119   2
  11   7   2 511.065 327.401  35
 -11   7  -3 32211.4 4765.88   2
 -11  -7  -3 35152.8 2978.80  26
  11   7   3 24473.7 2958.72   2
  11   7   3 26911.2 3523.80  35
 -11  -7  -4 3069.82 958.915  26
  11  -7   4 3287.78 1170.06   9
 -11  -7  -5 14599.9 2129.01  26
  11  -7   5 15378.4 2653.47   9
 -11  -7  -6 197.518 47.0870  26
 -11   7  -6 110.773 321.901  21
  11  -7   6 193.233 136.290   9
 -11  -7  -7 12171.5 1806.51  27
 -11  -7  -7 4009.17 1155.48  26
 -11   7  -7 9183.32 2164.35  21
  11  -7   7 8679.15 2070.96   9
 -11  -7  -8 5873.72 1264.80  27
 -11  -7  -8 932.809 619.657  26
 -11   7  -8 4082.34 1495.16  21
  11  -7   8 3167.68 1251.70   9
 -11  -7  -8 4890.35 1110.39  18
 -11  -7  -9 12968.2 1907.66  27
  11  -7   9 7548.33 1954.98   9
 -11   7  -9 10640.9 2456.70  21
 -11  -7  -9 14514.9 1826.94  18
 -11   7 -10 14573.9 2821.93  21
  11  -7  10 9235.05 2107.51   9
 -11  -7 -10 16591.5 2117.61  27
 -11  -7 -10 17534.8 1967.06  18
 -11  -7 -11 13190.6 1949.88  27
 -11   7 -11 12960.2 2647.70  21
 -11  -7 -11 17785.0 1923.75  18
 -11  -7 -12 4845.16 1113.02  27
  11  -7  12 1177.51 678.731   9
 -11   7 -12 5244.23 1587.79  21
 -11   7 -13 3139.30 1083.60  13
 -11   7 -13 3922.99 1292.19  21
 -11  -7 -13 1964.89 661.633  27
 -11   7 -14-309.663 276.146  13
 -11  -7 -14 228.122 232.598  27
  11  -9 -14 3863.09 1008.37  27
  11   9 -14 4879.70 1588.80  31
  11  -9 -13 3033.56 925.359  27
  11  -9 -13 2794.51 783.234  11
  11   9 -13 3979.48 1284.46  22
  11   9 -13 3754.92 1496.70  31
  11  -9 -12 11924.0 1929.70  27
  11  -9 -12 9784.84 1662.79  11
  11  -9 -12 9284.76 2466.43  17
  11   9 -12 11439.2 2108.85  22
  11   9 -12 14841.8 3141.50  31
  11  -9 -11 8334.93 1599.66  27
  11   9 -11 9087.13 1877.30  22
  11  -9 -11 5382.29 1933.08  17
  11  -9 -11 8359.54 1687.22  11
  11   9 -11 12043.3 2832.34  31
  11  -9 -10 3597.33 1048.99  27
  11  -9 -10 2248.63 962.351  11
 -11  -9  10 3305.16 1033.75   6
  11  -9 -10 1574.61 959.040  17
  11   9 -10 3604.28 1522.70  31
 -11  -9   9 7022.32 1537.22   6
  11  -9  -9 6498.15 1453.91  27
  11  -9  -9 6574.73 1677.91  11
  11  -9  -9 3813.46 1547.83  17
  11  -9  -8 109.430 110.398  27
 -11  -9   8 324.055 283.433   6
  11  -9  -8 292.243 223.507  11
  11  -9  -7 576.975 497.992  27
  11  -9  -7-179.995 352.124  11
  11  -9  -7 193.093 137.362  25
  11  -9  -7-90.7945 311.610  24
 -11  -9   7-0.85277 227.102   6
  11   9  -7 740.776 807.659  31
 -11  -9   6 6027.65 1370.06   6
  11  -9  -6 3555.84 1338.47  11
  11  -9  -6 6875.24 1583.12  24
  11   9  -6 8658.75 2458.91  31
  11  -9  -5 1211.93 722.515  11
 -11  -9   5 4948.38 1253.39   6
  11   9  -5 6271.04 2030.37  31
  11  -9  -5 4217.57 1283.39  24
  11   9  -4 8372.77 2324.12  31
 -11  -9   4 5713.92 1362.43   6
  11  -9  -4 1283.32 864.120  11
  11  -9  -4 4474.82 2348.54   3
  11  -9  -4 5806.91 1432.49  24
 -11  -9   3 18328.1 2396.91   6
  11  -9  -3 7482.31 1944.64  11
  11  -9  -3 17157.0 2552.98  24
  11  -9  -3 10618.2 3168.51   3
  11   9  -3 20115.9 3735.98  31
  11   9  -2 1326.54 865.158  31
  11  -9  -2 444.960 355.690  11
 -11  -9   2 1971.30 849.996  25
 -11  -9   2 1307.21 633.224   6
  11  -9  -2 1534.04 724.228  24
  11  -9  -2 919.018 829.781   3
 -11  -9   1 12698.5 2032.98   6
  11  -9  -1 10436.4 2330.25  11
 -11  -9   1 14198.8 2228.82  25
  11  -9  -1 10463.1 2005.32  24
  11  -9  -1 6837.97 2543.96   3
 -11  -9   0 163.843 12.2520  25
 -11  -9   0-120.363 338.625   6
  11  -9   0-74.6823 103.485  24
  11  -9   1 3957.76 1214.34  24
 -11  -9  -1 3596.92 1114.81   6
  11  -9   1 2927.60 1041.90   9
 -11  -9  -2 1949.55 834.130   6
 -11  -9  -2 1944.30 749.247  26
  11  -9   2 2189.03 905.430  24
  11  -9   2 2038.12 970.909   9
 -11  -9  -3 595.393 531.640   6
 -11  -9  -3 176.478 178.898  26
  11  -9   3 58.1695 309.814  24
 -11  -9  -4 2492.29 920.953  26
  11  -9   4 2551.65 1169.27   9
 -11  -9  -5 687.856 496.073  26
 -11   9  -5 241.869 274.491  21
  11  -9   5 226.893 194.853   9
 -11  -9  -6 1873.34 801.094  26
  11  -9   6 2914.63 1175.07   9
 -11   9  -6 3735.28 1373.42  21
  11  -9   7 519.237 503.657   9
 -11   9  -7 915.317 523.316  21
 -11  -9  -7 1351.44 540.307  18
 -11  -9  -7 99.3069 266.458  26
  11  -9   8 147.662 493.379   9
 -11   9  -8-361.121 630.640  21
 -11  -9  -8-477.247 427.186  18
 -11   9  -9-272.209 559.511  21
  11  -9   9 20.0629 187.369   9
 -11  -9  -9 224.174 165.525  18
 -11  -9 -10 1205.51 507.473  27
  11  -9  10 843.659 582.960   9
 -11  -9 -10 2245.24 584.315  18
 -11  -9 -11 1831.07 631.348  27
  11  -9  11 258.471 313.056   9
  11   9  12 3320.66 699.046   4
  11  11 -11 8595.52 1568.71  22
  11 -11 -10 619.750 306.122  11
 -11 -11  10 2053.17 795.120   6
  11  11 -10 1252.38 519.223  22
  11 -11 -10 1437.43 806.825  17
  11  11 -10 688.738 593.299  31
  11 -11  -9-20.1547 366.951  11
 -11 -11   9 1889.36 769.952   6
  11  11  -9 1689.33 719.595  22
  11 -11  -9 1155.39 768.399  17
  11  11  -9 1169.11 601.810  31
  11 -11  -8-121.709 372.728  11
 -11 -11   8-148.096 380.162   6
  11  11  -8 57.3287 120.339  22
  11 -11  -8-87.7538 611.365  17
  11  11  -8 101.734 209.924  31
  11  11  -7-145.380 61.3305  31
  11 -11  -7-278.434 363.061  11
 -11 -11   7 23.7472 86.1400   6
  11 -11  -7 545.400 588.945  25
  11  11  -7-82.7893 293.656  22
  11 -11  -7-364.374 736.916  17
  11 -11  -6 126.327 244.297  11
  11  11  -6 2521.30 1155.12  31
 -11 -11   6 1767.27 732.128   6
  11 -11  -6 2054.28 913.209  25
  11  11  -6 2137.27 758.687  22
 -11 -11   5 7041.56 1538.13   6
  11  11  -5 5952.33 1762.91  31
  11 -11  -5 2766.14 1099.57  11
  11 -11  -5 5544.20 1490.54  25
  11  11  -5 6778.87 1365.27  22
  11 -11  -4 2774.33 1009.56  11
 -11 -11   4 4191.61 1148.78   6
  11 -11  -4 3239.84 1133.40  25
  11  11  -4 3150.61 1292.21  31
  11  11  -3 574.137 608.335  31
 -11 -11   3 586.715 370.189  26
 -11 -11   3 1343.46 674.635   6
  11  11  -2 6030.00 1719.72  31
 -11 -11   2 8543.57 1516.59  26
  11 -11  -2 9520.90 1933.24  24
  11 -11  -2 3040.87 1591.05   3
 -11 -11   2 1219.44 823.573   3
 -11 -11   2 7867.03 1654.14   6
  11  11  -1-55.6537 338.002  31
 -11  11   1-194.756 195.616  31
 -11 -11   1 805.175 460.304  26
  11 -11  -1 730.005 574.502  24
  11 -11  -1 191.421 287.668   3
 -11 -11   1-908.293 1353.78   3
 -11 -11   1 488.921 491.137   6
 -11  11   0 237.596 231.671  31
  11  11   0 483.164 512.683  31
 -11 -11   0 584.916 590.479   6
 -11 -11   0 691.643 456.974  26
  11 -11   0 497.447 277.956  24
  11 -11   0 303.251 268.745   3
 -11 -11   0 740.369 636.724   3
 -11  11  -1 1439.05 778.788  31
 -11 -11  -1 2833.26 1038.89   6
 -11 -11  -1 2851.64 890.446  26
  11 -11   1 3583.11 1203.63  24
  11 -11   1 679.564 1172.30   3
  11 -11   1 3524.18 1206.01   9
 -11  11  -2 1735.48 820.209  31
 -11 -11  -2 3005.77 909.099  26
 -11 -11  -2 1164.98 754.040   6
  11 -11   2 3110.80 1064.93  24
  11 -11   2 2414.55 988.989   9
  11 -11   3 2285.56 1036.81   9
 -11 -11  -3 2217.14 857.309  26
 -11 -11  -4 4123.94 1115.41  26
  11 -11   4 3679.02 1244.90   9
 -11 -11  -5 80.6768 212.452  26
  11 -11   5 552.325 435.722   9
 -11 -11  -6 415.889 393.236  26
  11 -11   6 393.950 262.040   9
  11 -11   7-407.355 361.274   9
 -11 -11  -7-254.962 164.567  18
 -11 -11  -8 335.968 214.732  18
  11 -11   8 120.749 234.416   9
  11 -13  -3 313.350 261.161  25
  11 -13  -2 1316.26 606.835  25
  11 -13  -1 1167.60 559.854  25
  11 -13   0 19.6606 107.306  25
  12   0 -19-1808.43 1369.54  13
  12   0 -18 8914.77 2300.14  13
  12   0 -17-1138.17 1193.07  13
  12   0 -17-2396.48 1285.59  12
  12   0 -16 49876.0 7152.72  31
  12   0 -16 44576.4 4199.21  14
  12   0 -16 49241.6 5620.92  13
  12   0 -15-148.500 207.839  13
  12   0 -15-33.8198 372.560  14
  12   0 -15-353.947 723.638  31
  12   0 -14 33427.9 3403.80  14
  12   0 -14 43921.4 6452.79  31
  12   0 -14 35074.0 4362.58  13
  12   0 -13-184.493 378.346  13
  12   0 -13-116.873 488.290  32
  12   0 -13 279.775 82.7374  14
  12   0 -13-253.758 475.084  31
  12   0 -12 2291.75 1009.59  13
  12   0 -12 1624.23 645.461  10
  12   0 -12 1437.85 520.765  14
  12   0 -12 681.588 477.425  32
  12   0 -12 3268.01 1514.07  31
  12   0 -11-872.793 776.885  40
  12   0 -11-26.8630 1026.45  38
  12   0 -10 6998.32 2078.70  40
  12   0 -10 9549.34 2987.33  38
  12   0  -9-64.3863 158.324  40
  12   0  -9 152.393 429.945  38
  12   0  -8 9802.27 2579.29  38
  12   0  -8 8197.78 2007.82  40
  12   0  -7-34.2686 494.902  40
  12   0  -7 326.526 527.275  38
 -12   0   7-515.114 430.083  41
 -12   0   6 16461.9 2755.84  29
  12   0  -6 24577.0 3246.58  38
  12   0  -6 18394.7 2767.68  40
 -12   0   5 211.618 317.345  29
 -12   0   5 212.883 410.945  41
  12   0  -5 186.034 428.265  38
 -12   0   4 199772. 8280.03  41
  12   0  -4 200590. 7213.15  38
  12   0  -3-54.6596 210.047  38
 -12   0   3 37.9348 201.749  41
  12   0  -2 22002.8 1657.01  38
 -12   0   2 27695.7 2920.14  41
  12   0  -1-22.2464 74.1777  38
 -12   0   1 33.2444 249.666  41
 -12   0   1-7.41790 129.629  36
 -12   0   0 313602. 9398.52  41
 -12   0   0 279104. 7868.29  36
 -12   0  -1 106.481 79.8052  41
 -12   0  -1-149.393 297.242  36
 -12   0  -2 811026. 15735.9  36
 -12   0  -2 750104. 14676.5  41
 -12   0  -3-1.48610 10.0850  41
 -12   0  -3-222.252 480.428  36
  12   0   4 184947. 8565.36   1
 -12   0  -4 213292. 9409.32  36
  12   0   5-906.514 618.864   1
 -12   0  -5-79.8349 377.060  36
  12   0   6 22840.0 3349.77   1
 -12   0  -6 33244.6 4276.32  36
  12   0   7 110.636 462.307   1
 -12   0  -7-5.84167 271.836  36
 -12   0  -8 1348.22 960.312  36
  12   0   8 381.360 260.049   1
  12   0   9 529.304 550.930   1
 -12   0  -9 63.2013 481.513  36
 -12   0 -10-19.6042 183.963  27
 -12   0 -10 737.622 277.643  20
 -12   0 -11-57.4464 319.626  27
 -12   0 -11 235.346 479.075  19
 -12   0 -11 70.1586 126.238  20
 -12   0 -11-260.342 421.834  16
 -12   0 -12 1731.76 797.050  19
 -12   0 -12 3582.55 977.501  16
 -12   0 -13-187.756 496.255  19
 -12   0 -13-110.216 158.511  16
 -12   0 -14 460.981 137.629  16
 -12   0 -14 100.123 377.832  19
 -12   0 -15-190.472 199.300  19
 -12   0 -15-292.925 302.967  16
 -12   0 -16 2216.44 554.829  16
 -12   0 -16 2555.10 793.678  14
  12   2 -19 1280.00 1170.73  13
  12   2 -18 1593.75 946.184  12
  12   2 -18 1258.24 1180.24  31
  12  -2 -18 1079.81 1039.84  13
  12   2 -18 1803.03 1060.27  13
  12   2 -17 3908.14 1386.01  13
  12   2 -17 3913.62 1180.31  15
  12   2 -17 5329.50 1974.30  31
  12  -2 -17 5292.09 1992.82  13
  12   2 -16 35101.4 5989.15  31
  12   2 -16 28336.6 4022.41  13
  12  -2 -16 17993.3 3162.06  12
  12   2 -16 24152.4 2953.11  15
  12  -2 -16 31890.9 4933.49  13
  12   2 -15-298.773 447.568  13
  12  -2 -15 63.2049 382.438  12
  12   2 -15 534.300 186.733  14
  12   2 -15-150.004 271.967  31
  12   2 -15 559.581 575.799  32
  12  -2 -15 341.787 314.339  13
  12  -2 -14 24749.2 3945.39  12
  12  -2 -14 33611.5 3449.89  10
  12   2 -14 33163.9 3678.03  14
  12   2 -14 16264.8 3047.37  32
  12   2 -14 43639.0 6317.66  31
  12  -2 -14 37081.9 4816.39  13
  12   2 -14 29173.6 3724.93  13
  12  -2 -13-40.9202 311.566  13
  12   2 -13 516.228 503.124  13
  12  -2 -13 95.8289 236.447  12
  12  -2 -13 910.406 1126.00  31
  12  -2 -13 354.152 267.313  10
  12   2 -13 455.962 188.717  16
  12   2 -13-89.9775 123.183  14
  12   2 -13 230.437 135.579  32
  12   2 -13 812.513 955.173  31
  12  -2 -12 37302.6 3538.93  10
  12   2 -12 37311.2 3516.03  14
  12   2 -12 33413.9 4336.26  32
  12  -2 -12 48242.9 6088.36  31
  12   2 -12 50879.7 6058.13  31
  12  -2 -12 41106.9 4553.83  13
  12   2 -12 33727.7 3521.58  13
  12   2 -11 5943.55 2060.80  40
  12  -2 -11 6134.65 2062.91  40
  12   2 -11 8097.30 3086.22  38
  12   2 -11 8178.47 2902.30  37
  12  -2 -11 4191.99 2230.79  33
  12  -2 -10 7485.45 2251.88  40
  12   2 -10 6471.10 2013.35  40
  12   2 -10 8363.34 2919.02  38
  12   2 -10 8046.39 2692.18  37
  12  -2 -10 6373.43 2381.89  33
  12   2  -9 4707.92 1555.68  40
  12  -2  -9 4313.45 1548.96  40
  12   2  -9 8905.40 2775.59  38
  12   2  -9 5380.85 2022.91  37
  12  -2  -9 3680.09 1724.90  33
  12   2  -8 66826.9 5826.49  40
  12   2  -8 92937.0 8119.31  38
  12   2  -8 84509.2 7327.45  37
  12  -2  -8 67073.0 5815.04  40
  12  -2  -8 66035.0 6775.19  33
  12   2  -7 751.698 731.038  28
 -12   2   7 1412.45 940.442  41
  12   2  -7 661.700 456.046  40
  12   2  -7 935.697 490.181  38
  12   2  -7 955.718 596.330  37
  12  -2  -7 685.990 514.941  40
  12  -2  -7 311.203 267.708  33
  12   2  -6 328904. 13069.0  28
 -12  -2   6 273276. 8540.99  41
  12  -2  -6 245900. 9778.23  40
 -12   2   6 226392. 9790.12  41
  12   2  -6 276287. 11069.3  40
  12   2  -6 357815. 13612.6  38
  12   2  -6 285058. 11076.4  37
  12  -2  -6 217211. 10204.6  33
 -12   2   5 683.502 50.7621  30
  12   2  -5 1474.81 717.500  28
  12  -2  -5 1577.35 711.952  40
 -12  -2   5 1771.94 721.106  41
  12   2  -5 2910.21 1074.20  38
  12  -2  -5 1437.07 687.224  33
 -12   2   5 1604.24 733.918  41
  12  -2  -4 299235. 9746.11  40
 -12   2   4 310173. 9911.79  41
 -12  -2   4 314284. 9399.87  41
  12   2  -3 5426.79 1211.00  29
  12   2  -3 7242.93 1401.47  28
  12  -2  -3 3407.17 962.398  39
 -12  -2   3 4217.99 1140.31  41
  12  -2  -3 3415.99 884.154  33
 -12   2   3 5056.76 1183.72  41
  12  -2  -2 7385.63 919.474   1
 -12   2   2 7356.73 1351.02  41
 -12   2   2 6768.41 941.640  36
  12   2  -2 6500.60 973.146  35
  12  -2  -2 4659.05 983.396  33
 -12  -2   2 6251.78 1351.11  41
 -12   2   1 4587.02 1060.48  41
 -12   2   1 3924.48 793.551  36
  12  -2  -1 3492.62 718.979   1
  12   2  -1 4308.94 886.743  35
 -12  -2   1 3737.57 1047.12  41
  12  -2  -1 2077.39 502.213  33
  12  -2   0 4529.30 989.676  30
 -12   2   0 7467.78 1336.81  41
 -12   2   0 6797.35 1116.89  36
  12   2   0 6918.91 1196.76  35
 -12  -2   0 8544.57 1554.61  41
  12  -2   0 6225.34 1047.58   1
 -12  -2  -1 21144.3 2401.60  41
 -12   2  -1 23961.5 2458.79  36
 -12  -2  -1 11039.3 2003.00  36
  12   2   1 26618.8 2464.13  35
  12  -2   1 14733.7 1807.88   1
 -12   2  -1 22351.8 2280.38  41
 -12   2  -2 170151. 6371.60  41
 -12  -2  -2 206074. 7317.72  41
 -12   2  -2 183150. 7269.52  36
 -12  -2  -2 196836. 8567.41  36
  12   2   2 263093. 8347.54  35
  12  -2   2 117116. 5583.44   1
 -12   2  -3 3644.15 898.653  41
 -12  -2  -3 3915.20 1016.37  41
  12  -2   3 1436.95 673.453   1
 -12   2  -3 3478.18 1051.31  36
 -12  -2  -3 4718.21 1426.89  36
 -12  -2  -4 66423.2 3921.78  41
 -12   2  -4 68585.0 4144.94  41
 -12   2  -4 69731.7 5153.84  36
 -12   2  -5 29437.0 3541.79  36
 -12  -2  -5 36293.8 4488.18  36
  12  -2   6 1993.81 971.043   1
 -12  -2  -6 9112.41 2378.34  36
 -12   2  -6 6359.30 1726.58  36
  12  -2   7 740.026 687.438   1
 -12   2  -7 3671.06 1382.00  36
 -12  -2  -7 4144.52 1637.53  36
  12  -2   8 2253.88 1199.14   1
  12   2   8 10886.0 2495.81   1
 -12   2  -8 8661.70 2321.80  36
 -12  -2  -8 10620.8 2816.43  36
 -12  -2  -9 1355.94 997.454  36
 -12  -2  -9 1117.20 584.395  27
 -12   2  -9 1394.22 720.371  19
 -12   2  -9 1677.28 1108.28  36
 -12  -2 -10 26777.7 2799.37  27
 -12   2 -10 22517.6 3477.82  19
 -12   2 -10 23683.1 3086.74   7
 -12  -2 -11-38.5165 349.787  27
 -12   2 -11 289.805 279.368  19
 -12  -2 -12 8026.45 1583.52  27
 -12   2 -12 10532.2 2295.93  19
 -12  -2 -12 12616.1 2596.11  19
 -12  -2 -13 444.443 262.758  27
 -12  -2 -13 1071.89 454.994  16
 -12   2 -13 1063.21 762.490  19
 -12  -2 -13 1228.10 721.477  19
 -12   2 -14 829.603 476.753  13
 -12  -2 -14 2155.54 768.695  27
 -12  -2 -14 2509.25 803.454  16
 -12   2 -14 1197.18 465.138  19
 -12   2 -15 2343.71 684.208  13
 -12  -2 -15 3424.22 867.246  27
 -12  -2 -15 4500.67 946.017  16
 -12   2 -16 3129.31 993.278  13
 -12  -2 -16 2761.15 620.180  16
  12   4 -18 2777.76 1349.75  31
  12   4 -18 3049.02 1284.61  13
  12   4 -17 155.809 511.954  13
  12   4 -17 388.548 724.039  31
  12   4 -17-7.35979 233.266  15
  12   4 -16 3966.33 1421.62  13
  12  -4 -16 3425.38 1196.59  27
  12  -4 -16 4870.48 1237.38  11
  12   4 -16 3581.50 1256.86  32
  12   4 -16 3699.51 1150.49  15
  12   4 -16 4892.64 2147.29  31
  12   4 -15 2177.73 984.149  13
  12   4 -15 2133.53 1154.69  32
  12  -4 -15 1794.62 758.745  27
  12  -4 -15 1813.49 766.867  12
  12   4 -15 1936.79 778.307  15
  12   4 -15 4499.28 1730.37  31
  12  -4 -14 22883.0 2920.13  27
  12  -4 -14 14638.4 2841.19  12
  12   4 -14 25831.3 3099.32  15
  12   4 -14 18955.0 3557.38  32
  12   4 -14 20832.8 3018.37  13
  12   4 -13 4771.45 1353.61  13
  12  -4 -13 1964.13 1203.54  12
  12  -4 -13 5296.65 1364.73  27
  12  -4 -13 6703.71 1631.96  10
  12   4 -13 6903.26 2117.66  32
  12   4 -13 5413.84 1365.13  15
  12   4 -13 9616.66 2868.37  31
  12  -4 -12 12214.8 2039.24  27
  12  -4 -12 5972.42 1970.50  12
  12  -4 -12 14457.8 2347.34  10
  12   4 -12 12749.3 2087.59  15
  12   4 -12 11658.0 2023.89  13
  12   4 -11 1414.27 610.878  13
  12  -4 -11 180.008 445.696  12
  12  -4 -11 1283.60 586.569  27
  12  -4 -11 2213.31 897.511  10
  12  -4 -11 1323.29 956.803  17
  12   4 -11 1701.57 713.580  15
  12   4 -11 1772.59 931.638  31
  12  -4 -10 203.091 518.659  12
  12  -4 -10 656.743 376.434  27
  12  -4 -10 1431.20 687.417  10
  12  -4 -10 1722.78 1327.42  40
  12   4 -10 487.832 658.743  38
  12   4 -10 1482.74 1471.30  37
  12  -4 -10 626.291 1079.12  33
  12   4  -9 757.063 1078.52  28
  12  -4  -9 600.965 443.911  40
  12   4  -9 2983.58 1846.54  38
  12   4  -9 1041.60 800.287  37
  12  -4  -9 391.035 1146.50  33
  12   4  -8 59196.7 7960.25  28
  12  -4  -8 43946.6 4931.28  40
  12   4  -8 66529.7 8154.09  38
  12  -4  -8 35976.6 6149.59  33
  12   4  -7 926.905 757.741  28
 -12   4   7 1194.10 797.361  41
  12   4  -7 656.061 450.347  40
  12   4  -7 1421.81 1068.36  38
  12  -4  -7 333.719 545.694  40
  12  -4  -7 2729.17 1748.93  33
  12   4  -6 39090.7 3480.07   2
 -12   4   6 49485.9 4548.28  41
  12   4  -6 45389.3 4581.47  40
  12  -4  -6 42034.2 4153.17  40
  12  -4  -6 43842.3 6267.66  39
  12  -4  -6 41000.6 5738.81  33
 -12  -4   6 49592.6 3964.04  41
 -12   4   5 4152.84 1199.41   2
 -12  -4   5 4916.52 1218.12  41
  12   4  -5 3255.83 925.624   2
  12  -4  -5 3952.53 1741.39  39
  12  -4  -5 4282.78 1200.87  40
  12  -4  -5 3729.64 1527.60  33
  12  -4  -4 1061.35 504.509  40
 -12   4   4 248.265 109.202   2
 -12  -4   4 1894.96 800.773  41
  12   4  -4 681.526 411.923   2
  12  -4  -4 1386.25 966.699  39
  12  -4  -4 151.580 434.503  33
 -12   4   3 1189.30 661.190   2
  12   4  -3 797.496 475.506   2
 -12  -4   3 1309.18 632.482  41
  12  -4  -3 1414.86 952.856  33
 -12   4   2 7396.83 1688.02   2
 -12  -4   2 8373.34 1561.95  41
  12   4  -2 6180.36 1205.19   2
  12   4  -2 7489.30 1349.19  35
 -12   4   1 825.580 605.503   2
 -12  -4   1 1243.73 630.614  41
  12   4  -1 920.893 483.494   2
  12   4  -1 925.608 443.419  35
  12  -4  -1 252.142 453.276  34
 -12   4   0 41967.5 4319.02   2
 -12  -4   0 45007.4 3627.16  41
  12   4   0 37472.4 2963.64   2
  12   4   0 34484.5 3107.82  35
  12  -4   0 29172.2 4570.20  34
  12   4   1 18316.1 2076.56   2
 -12   4  -1 17065.5 2086.12  36
 -12   4  -1 22431.8 3215.49   2
 -12  -4  -1 20277.6 2456.46  41
  12   4   1 15838.9 2216.27  35
 -12   4  -2 103951. 7100.38   2
 -12   4  -2 86292.0 5144.64  36
  12   4   2 82395.9 5213.93  35
  12   4   2 90220.4 4755.31   2
 -12  -4  -2 111227. 6081.15  41
 -12   4  -3 50892.2 3524.35  41
 -12   4  -3 63673.9 5661.25   2
 -12   4  -3 52591.5 4314.34  36
  12   4   3 57337.8 4455.45  35
 -12   4  -4 34324.6 4235.69   2
 -12   4  -4 32019.8 3733.50  36
 -12   4  -4 26535.5 2619.12  41
  12   4   4 38452.4 3745.41  35
 -12   4  -5-349.809 735.589   2
  12   4   5 633.214 476.917  35
 -12   4  -5-101.154 406.194  36
 -12   4  -6 6006.43 1775.54  36
  12   4   6 7381.22 1771.30  35
 -12   4  -7 41865.7 4982.41  36
  12   4   7 49503.6 4799.09  35
 -12  -4  -8 1613.79 650.435  27
 -12  -4  -8 666.005 341.115  18
 -12   4  -8 175.843 359.991  19
 -12   4  -8 1468.84 713.447   7
 -12  -4  -9 33365.2 3004.03  27
 -12   4  -9 24206.4 3459.27  19
 -12  -4  -9 30881.6 2557.52  18
 -12   4  -9 27944.6 3503.21   7
 -12  -4 -10 15341.0 2075.02  27
 -12  -4 -10 15894.8 1832.99  18
 -12   4 -10 10777.6 2340.88  19
 -12  -4 -11 1669.11 678.980  27
 -12   4 -11 1178.92 687.539  19
 -12  -4 -12 3578.30 1050.54  27
 -12   4 -12 3361.34 1327.67  21
 -12   4 -12 4986.14 1645.81  19
 -12   4 -13 2023.53 979.305  21
 -12   4 -13 2239.46 940.631  19
 -12  -4 -13 1609.16 626.079  27
 -12   4 -14 284.669 366.386  13
 -12   4 -14 96.0624 368.017  21
 -12  -4 -14 288.614 330.146  27
 -12  -4 -15 4842.82 1026.99  27
 -12   4 -15 4319.60 1256.72  13
 -12  -4 -15 6608.59 1055.66  16
  12   6 -17-1230.83 1201.05  31
  12  -6 -16 374.037 426.235  27
  12  -6 -16 462.944 267.304  11
  12   6 -16 886.269 520.763  15
  12   6 -16 952.095 844.748  31
  12  -6 -15 591.609 525.355  27
  12  -6 -15 106.570 157.692  11
  12   6 -15 228.406 220.356  15
  12   6 -15-269.772 376.059  32
  12   6 -15 461.676 497.751  31
  12  -6 -14 15492.5 2439.60  27
  12  -6 -14 15874.0 2439.12  11
  12   6 -14 15557.7 3063.34  32
  12   6 -14 13979.9 2270.98  15
  12   6 -14 22765.7 4457.00  31
  12  -6 -13 1455.22 654.395  27
  12  -6 -13 2320.91 979.202  11
  12   6 -13 1223.43 777.442  22
  12   6 -13 1222.56 758.948  15
  12   6 -13 2434.93 1562.55  31
  12  -6 -12 21553.1 2807.04  27
  12  -6 -12 22593.3 3167.04  11
  12   6 -12 21857.7 3013.35  22
  12  -6 -12 26530.4 4979.97  17
  12   6 -12 21494.0 2866.39  15
  12   6 -12 31333.7 5161.71  31
  12  -6 -11-268.026 456.533  27
  12  -6 -11-134.068 293.466  11
  12  -6 -11 665.518 495.769  17
  12   6 -11 290.578 406.768  15
  12   6 -11 1130.79 1142.51  31
  12  -6 -10 618.448 506.212  27
  12  -6 -10 118.271 415.727  11
  12  -6 -10-304.528 1417.34  17
  12   6 -10 247.458 509.301  15
  12   6 -10 1890.97 1368.45  31
  12  -6  -9 1007.35 584.546  27
  12  -6  -9 1675.99 940.304  11
  12  -6  -9 494.721 488.521  17
  12   6  -9 1464.63 485.870  15
  12   6  -9 2665.80 1326.91  31
  12   6  -8 26625.8 2833.05  15
  12  -6  -8 13991.2 2030.00  27
  12  -6  -8 16420.1 2791.31  11
  12  -6  -8 29601.6 3349.54  10
  12   6  -8 33903.7 4578.79  31
  12   6  -7 1160.40 870.009  28
  12  -6  -7-862.949 1116.72  39
  12  -6  -7-1883.23 1590.52  33
  12   6  -7 1701.07 1287.65  38
  12  -6  -6 56698.3 8739.85  39
  12   6  -6 55900.1 4721.51   2
  12  -6  -6 60830.2 8700.15  33
 -12   6   5 188.489 441.539   2
  12   6  -5 673.103 575.486   2
  12  -6  -5-32.6859 859.794  39
  12  -6  -5 3.21136 1337.03  33
 -12   6   4 21417.6 3340.32   2
  12   6  -4 15959.3 2334.84   2
  12  -6  -4 21812.7 4809.65  33
  12  -6  -4 18968.4 4864.61  39
 -12   6   3 17142.4 2975.89   2
  12   6  -3 13316.5 2063.90   2
 -12   6   2 414.130 163.626   2
  12   6  -2 827.059 565.156   2
  12  -6  -2 503.742 633.083  34
 -12   6   1 6704.62 1924.46   2
  12   6  -1 4341.71 1121.61   2
  12  -6  -1 4605.58 2123.87  34
 -12   6   0 5777.31 1855.38   2
  12   6   0 3227.51 964.430   2
  12   6   0 3812.62 1209.72  35
  12  -6   0 5500.09 2380.83  34
  12   6   1 853.663 611.713  35
 -12   6  -1 1144.68 738.999   2
  12   6   1 625.677 434.001   2
 -12   6  -2 34623.6 4703.65   2
  12   6   2 25177.1 2825.25   2
 -12   6  -2 25455.4 3196.86  36
  12   6   2 24551.1 3185.25  35
 -12   6  -3 338.934 675.931   2
  12   6   3-213.760 547.201  35
 -12   6  -3-240.301 450.641  36
  12   6   3-183.357 325.301   2
 -12   6  -4 29132.4 4472.89   2
  12   6   4 23321.6 2840.99   2
 -12   6  -4 25440.0 3577.51  36
  12   6   4 22793.0 3241.72  35
 -12   6  -5 108.826 91.8189   2
 -12  -6  -5 213.417 310.530  26
  12   6   5-62.4640 183.333  35
 -12   6  -5 44.3976 507.302  36
 -12   6  -5 106.699 504.048   7
 -12  -6  -6 1504.79 606.227  27
 -12  -6  -6 122.574 184.198  26
 -12   6  -6 625.788 485.224  19
  12  -6   6 628.289 539.298   9
 -12   6  -6 660.963 533.331   7
 -12  -6  -7 7072.58 1392.58  27
 -12  -6  -7 1966.51 849.605  26
 -12   6  -7 6273.27 1694.61  19
 -12  -6  -7 6775.29 1165.16  18
  12  -6   7 5464.60 1612.71   9
 -12  -6  -8 9360.19 1657.92  27
  12  -6   8 6752.47 1879.25   9
 -12   6  -8 7507.60 1852.30  19
 -12  -6  -8 10855.5 1599.24  18
 -12  -6  -9 8435.80 1514.86  27
  12  -6   9 4592.50 1496.17   9
 -12  -6  -9 8895.61 1404.87  18
 -12  -6 -10 58833.6 4082.12  27
 -12   6 -10 51317.1 5414.38  21
 -12  -6 -11 3797.49 1034.70  27
 -12   6 -11 4723.10 1559.32  21
  12  -6  11 1139.40 712.029   9
 -12   6 -12 7312.48 1930.32  21
 -12  -6 -12 6588.10 1323.72  27
 -12  -6 -13 1620.50 624.133  27
 -12   6 -13 2563.69 1044.50  21
 -12   6 -14-69.9237 159.836  13
 -12  -6 -14-59.6297 163.609  27
 -12   6 -14 247.824 472.659  21
  12   8 -15 8834.27 2106.87  31
  12  -8 -15 5081.75 1191.06  27
  12  -8 -14 4346.23 1146.65  27
  12  -8 -14 3651.71 899.876  11
  12   8 -14 6732.44 1761.96  22
  12   8 -14 5192.16 1526.03  32
  12   8 -14 7324.72 2130.89  31
  12  -8 -13 16450.7 2363.26  27
  12  -8 -13 13945.0 2059.52  11
  12   8 -13 18521.4 2866.28  22
  12   8 -13 22197.3 3918.05  31
  12  -8 -12 4606.04 1355.23  11
  12   8 -12 4589.79 1342.41  22
  12  -8 -12 5354.06 1358.95  27
  12  -8 -12 5884.74 2221.04  17
  12   8 -12 8104.56 2421.66  31
  12  -8 -11 4455.61 1224.51  27
  12  -8 -11 4461.07 1374.67  11
  12   8 -11 4358.99 1322.77  22
  12  -8 -11 3391.71 1712.81  17
  12   8 -11 4946.44 1899.74  31
  12  -8 -10 301.492 274.484  27
  12  -8 -10 373.675 355.180  11
  12  -8 -10 630.644 1335.48  17
  12   8 -10 1200.73 762.679  31
  12  -8  -9 2932.18 957.203  27
  12  -8  -9 2096.20 1097.68  11
 -12  -8   9 3397.56 1076.61   6
  12   8  -9 5147.15 2114.75  31
  12  -8  -9 1981.12 660.909  17
  12  -8  -8 691.542 538.571  27
  12  -8  -8 209.334 354.747  11
 -12  -8   8 1039.38 568.472   6
  12   8  -8 526.986 620.851  31
  12  -8  -7 3671.41 1050.61  27
  12  -8  -7 529.866 405.042  11
 -12  -8   7 3054.44 960.835   6
  12  -8  -7 3662.40 1084.11  24
  12   8  -7 5737.94 1910.39  31
 -12  -8   6 14934.6 2092.14   6
  12  -8  -6 15899.7 2161.67  27
  12  -8  -6 16642.2 2374.41  24
 -12  -8   5 18020.1 2231.16   6
  12  -8  -5 19209.7 2553.21  24
  12   8  -5 25661.8 3969.12  31
 -12  -8   4 7013.40 1376.42   6
  12  -8  -4 2854.33 1225.04  11
  12  -8  -4 6456.14 1452.39  24
  12  -8  -4 4259.22 1700.25   3
  12  -8  -3 3124.00 1105.16  11
 -12  -8   3 4627.16 1152.12   6
  12  -8  -3 4113.72 1173.50  24
  12  -8  -2 590.010 480.188  11
 -12  -8   2 342.555 235.161  25
 -12  -8   2 127.946 246.610   6
  12  -8  -2 370.828 251.738  24
 -12  -8   1 6957.44 1417.91   6
  12  -8  -1 4972.88 1414.74  11
 -12  -8   1 7728.16 1528.01  25
  12  -8  -1 6857.99 1524.81  24
 -12  -8   0 11388.1 1872.68   6
 -12  -8   0 12156.6 1980.32  25
  12  -8   0 9484.96 1797.90  24
 -12  -8  -1 9990.39 1804.86   6
 -12  -8  -1 11180.1 1664.37  26
  12  -8   1 10976.2 1971.57  24
  12  -8   1 11219.8 2100.26   9
 -12  -8  -2 6874.18 1563.42   6
 -12  -8  -2 7308.58 1408.57  26
  12  -8   2 7042.02 1568.14  24
  12  -8   2 7759.38 1774.99   9
 -12  -8  -3 17741.5 2262.60  26
  12  -8   3 16802.8 2462.01  24
  12  -8   3 18273.4 2863.63   9
 -12  -8  -3 12194.9 2191.57   6
 -12  -8  -4 596.798 542.037   6
 -12  -8  -4 5359.11 1277.93  26
 -12   8  -4 5323.54 1605.71  21
  12  -8   4 5225.37 1577.84   9
  12  -8   5 3101.50 1251.39   9
 -12  -8  -5 2635.08 815.908  26
 -12   8  -5 3656.82 1400.18  21
 -12  -8  -6 228.592 248.951  26
  12  -8   6-120.753 409.677   9
 -12   8  -6-13.3751 427.276  21
 -12  -8  -7 69.1566 215.708  26
 -12   8  -7 319.204 97.6643  21
  12  -8   7-71.5676 210.749   9
 -12  -8  -7 75.9328 116.828  18
 -12  -8  -8 2752.86 880.861  27
 -12   8  -8 2441.37 1132.27  21
  12  -8   8 1602.04 957.122   9
 -12  -8  -8 2874.09 785.860  18
 -12  -8  -9 10591.3 1708.96  27
 -12   8  -9 12531.7 2597.34  21
 -12  -8  -9 14723.0 1707.11  18
 -12  -8 -10 7250.63 1370.06  27
 -12   8 -10 8598.41 2089.13  21
 -12  -8 -10 13181.4 1510.37  18
 -12  -8 -11 6546.17 1229.10  27
 -12   8 -11 10506.6 2231.38  21
 -12  -8 -12 4789.58 1001.86  27
 -12   8 -12 4759.54 1262.44  13
  12 -10 -12 1349.14 629.251  27
  12 -10 -12 827.945 407.672  11
  12  10 -12 1438.83 652.715  22
  12  10 -12 1604.89 835.794  31
  12 -10 -11 155.390 117.596  27
  12 -10 -11-252.461 418.367  11
  12  10 -11-35.6774 300.031  22
  12 -10 -11-989.245 840.084  17
  12  10 -11-365.975 268.449  31
  12 -10 -10 343.741 272.241  27
 -12 -10  10 1132.28 549.922   6
  12  10 -10 1292.92 671.702  22
  12 -10 -10 1013.84 576.445  17
  12  10 -10 747.665 501.971  31
  12 -10  -9 587.355 314.861  27
  12 -10  -9 140.353 173.425  11
 -12 -10   9 774.203 549.606   6
  12  10  -9 493.508 364.883  22
  12 -10  -9-453.705 929.259  17
  12  10  -9 805.539 637.603  31
  12 -10  -8-75.2622 114.865  11
 -12 -10   8 383.733 374.609   6
  12  10  -8 355.021 377.814  22
[truncated: 347,427 more chars]
